# Supplementary material for: Binding specificities of human RNA-binding proteins toward structured and linear RNA sequences
Source: PubMed Central journal article supplement — Genome Res. 2020 Jul;30(7):962–73. doi: 10.1101/gr.258848.119 (PMC7397871; doi:10.1101/gr.258848.119), 2020-07

# Meta-plots of the motif match enrichment near splice donor, acceptor, TSS, start and stop codon positions (y-axis scaled separately)

## Table of contents

*(Click line to access the first page of each section)*

|                                                    |                                      |
|----------------------------------------------------|--------------------------------------|
| <b>Splice acceptor, linear motifs</b>              | <b><a href="#">Pages 1-17</a></b>    |
| <b>Splice acceptor, structured motifs</b>          | <b><a href="#">Pages 18-24</a></b>   |
| <b>Splice donor, linear motifs</b>                 | <b><a href="#">Pages 25-41</a></b>   |
| <b>Splice donor, structured motifs</b>             | <b><a href="#">Pages 42-48</a></b>   |
| <b>Transcription start site, linear motifs</b>     | <b><a href="#">Pages 49-65</a></b>   |
| <b>Transcription start site, structured motifs</b> | <b><a href="#">Pages 66-72</a></b>   |
| <b>Start codon, linear motifs</b>                  | <b><a href="#">Pages 73-89</a></b>   |
| <b>Start codon, structured motifs</b>              | <b><a href="#">Pages 90-96</a></b>   |
| <b>Stop codon, linear motifs</b>                   | <b><a href="#">Pages 97-113</a></b>  |
| <b>Stop codon, structured motifs</b>               | <b><a href="#">Pages 114-120</a></b> |

ACCEPTOR

ZC3H8-GCUUGC

•• antisense — sense    • antisense • sense

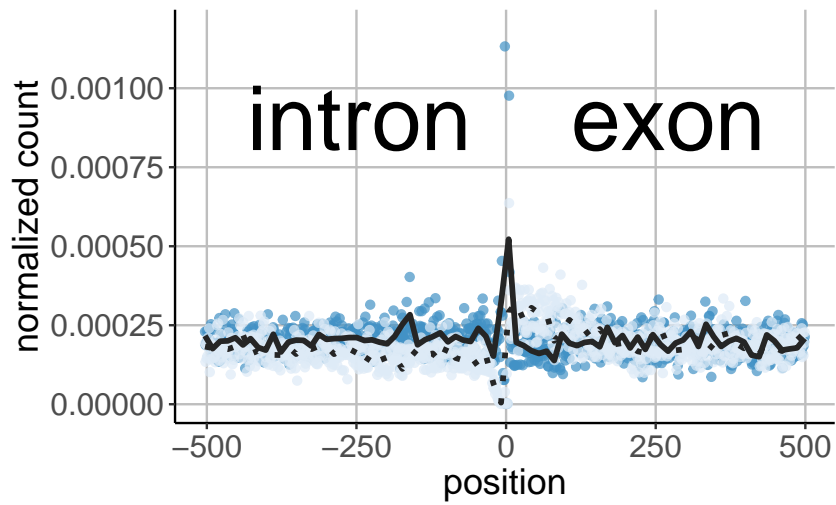

ESRP1\_3-GGUGUUGGUG

•• antisense — sense    • antisense • sense

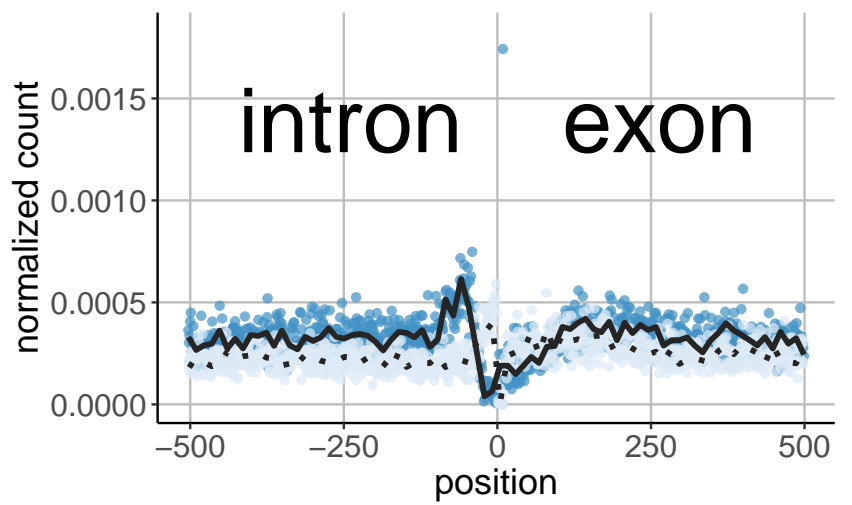

ELAVL3-GUUUUUG

•• antisense — sense    • antisense • sense

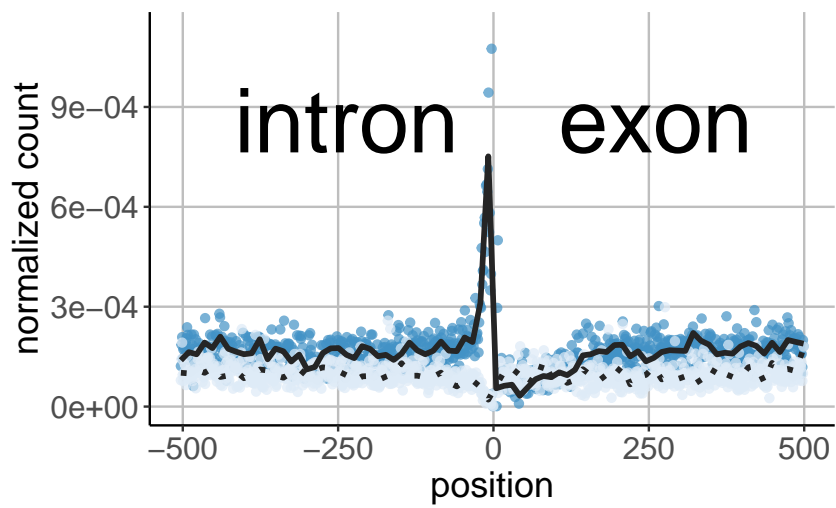

PUM1-NUGUAAAUAG

•• antisense — sense    • antisense • sense

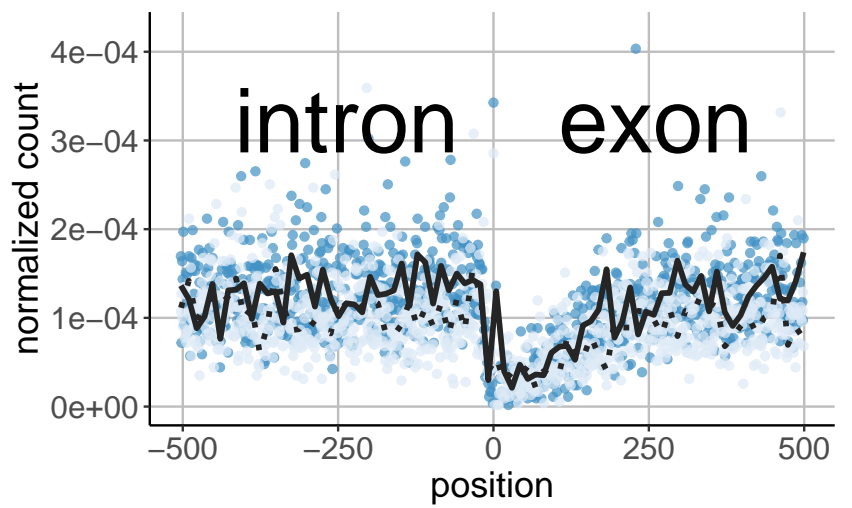

QKI-NUACUAACAWN

•• antisense — sense    • antisense • sense

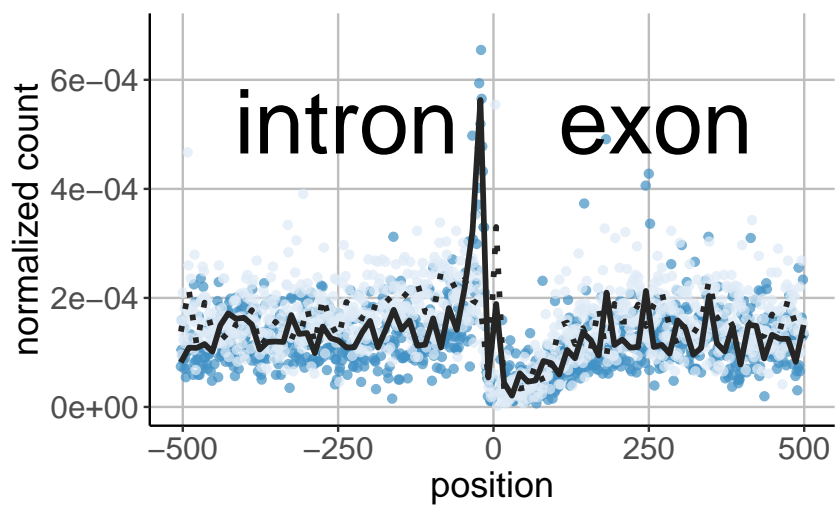

MCM3AP-CGCCAGUGCG

•• antisense — sense    • antisense • sense

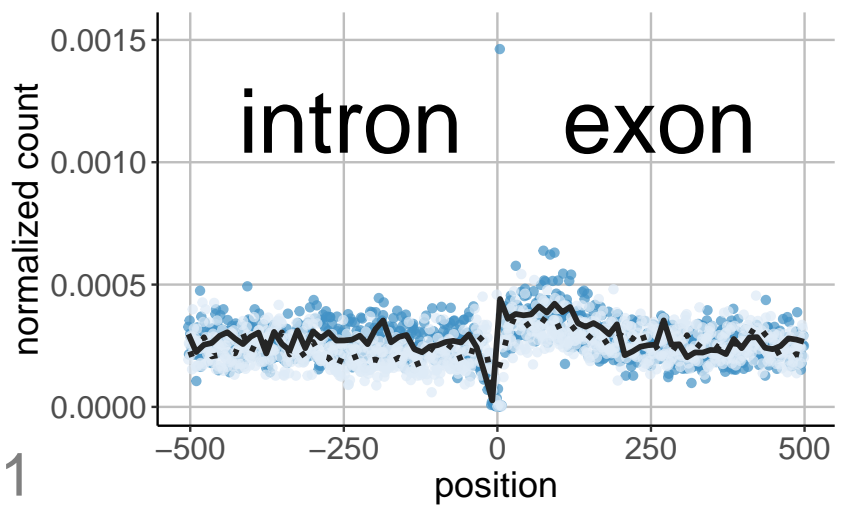

ACCEPTOR

HNRNPC-UUUUUGGUGG

•• antisense — sense    • antisense • sense

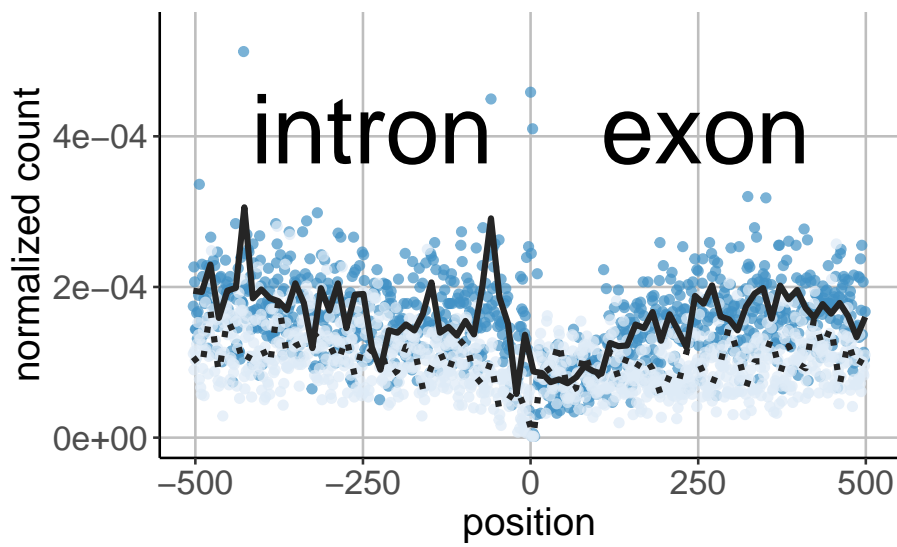

PABPC5-NUAKAAAKUURCN

•• antisense — sense    • antisense • sense

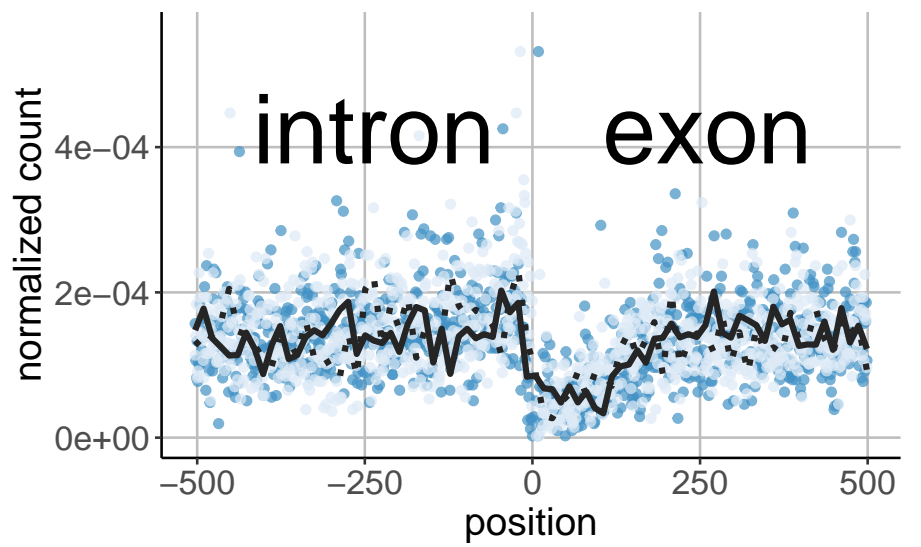

PABPC5-NUAKAAAUUACUACAN

•• antisense — sense    • antisense • sense

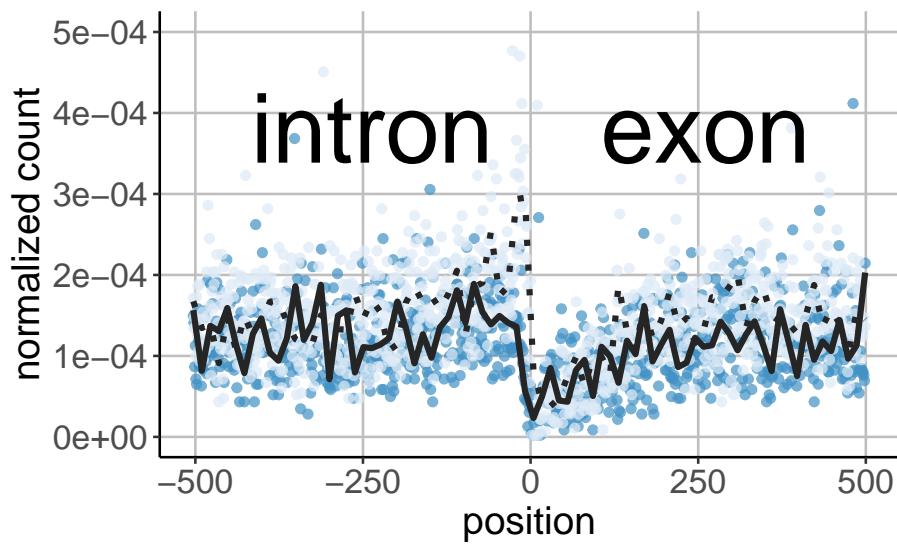

LARP7\_4-GRUCGUGAUGN

•• antisense — sense    • antisense • sense

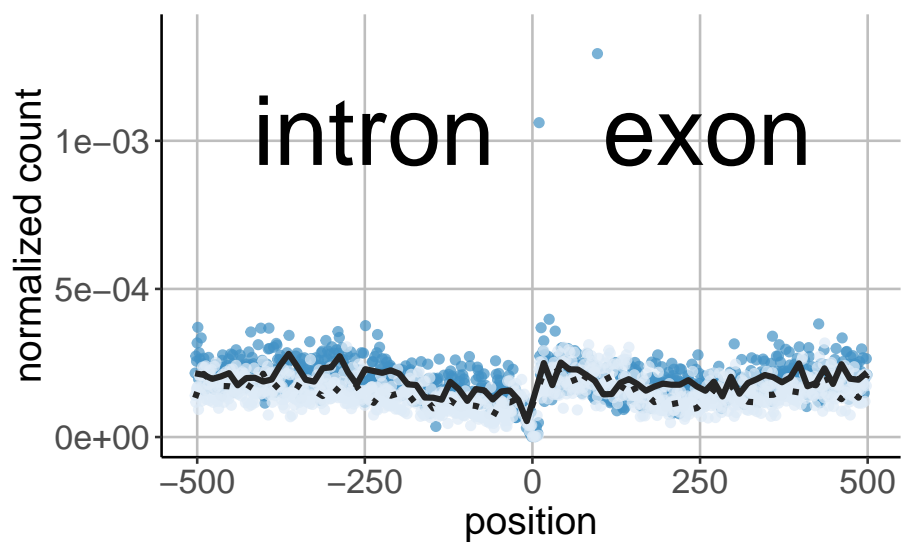

ZCRB1-GUAUUAAGGG

•• antisense — sense    • antisense • sense

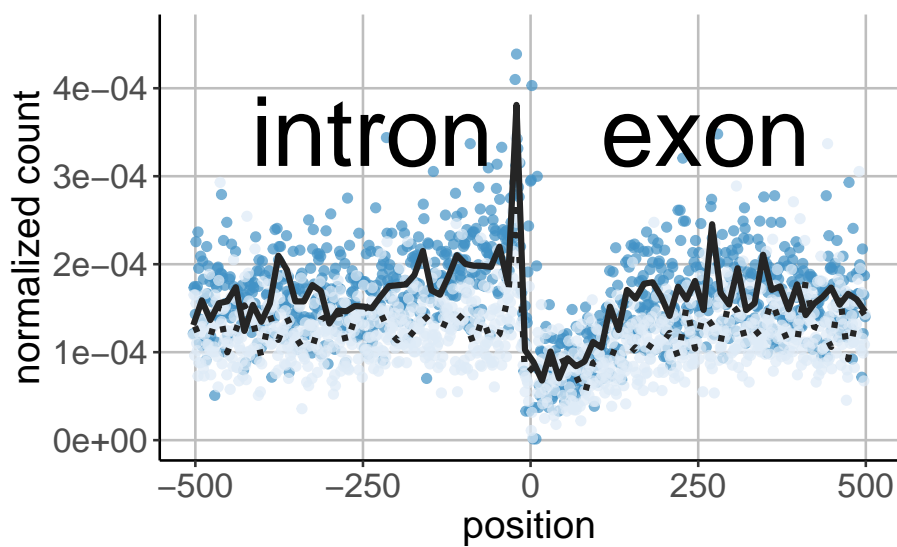

ZCRB1-GUGGACUUAANN

•• antisense — sense    • antisense • sense

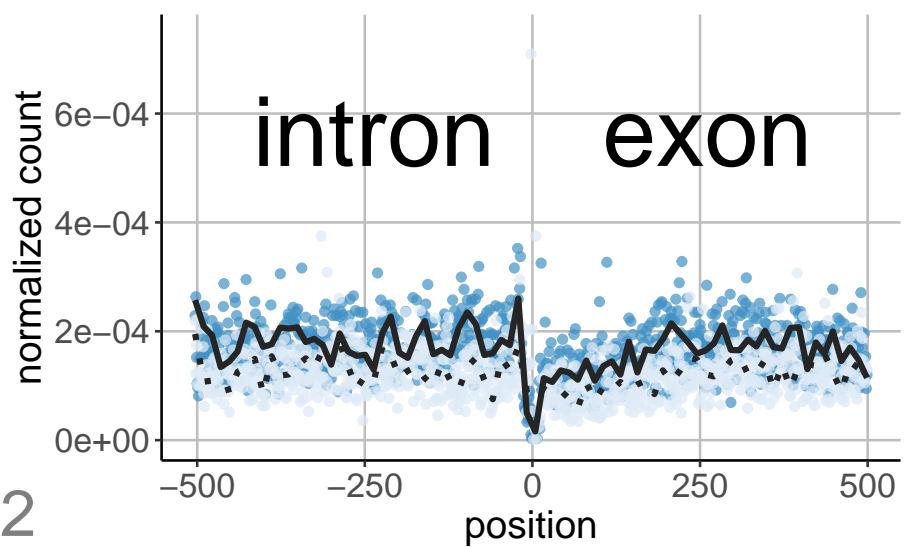

ACCEPTOR

RBM42-NGGAACUAAN

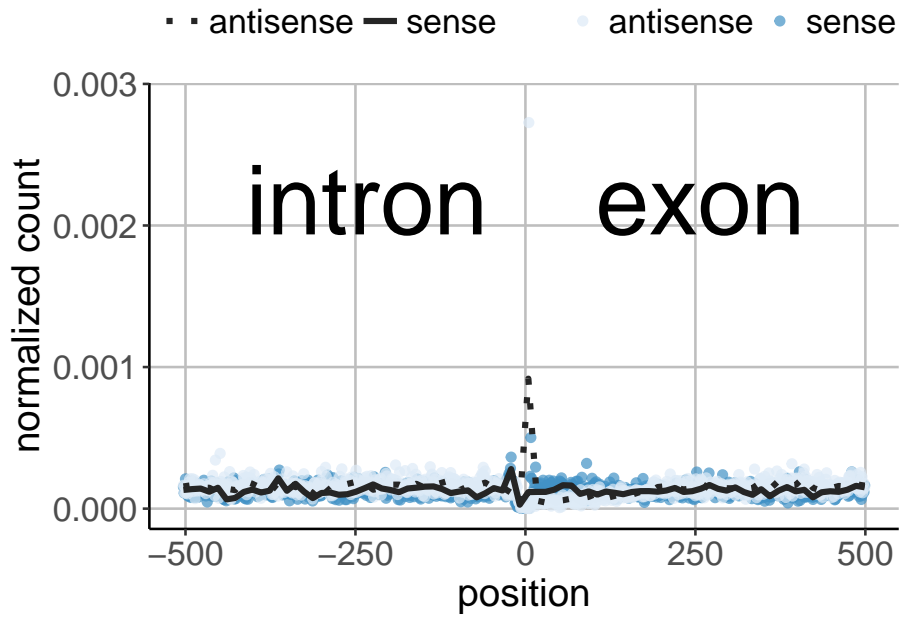

KHDRBS1-UAAUAGN

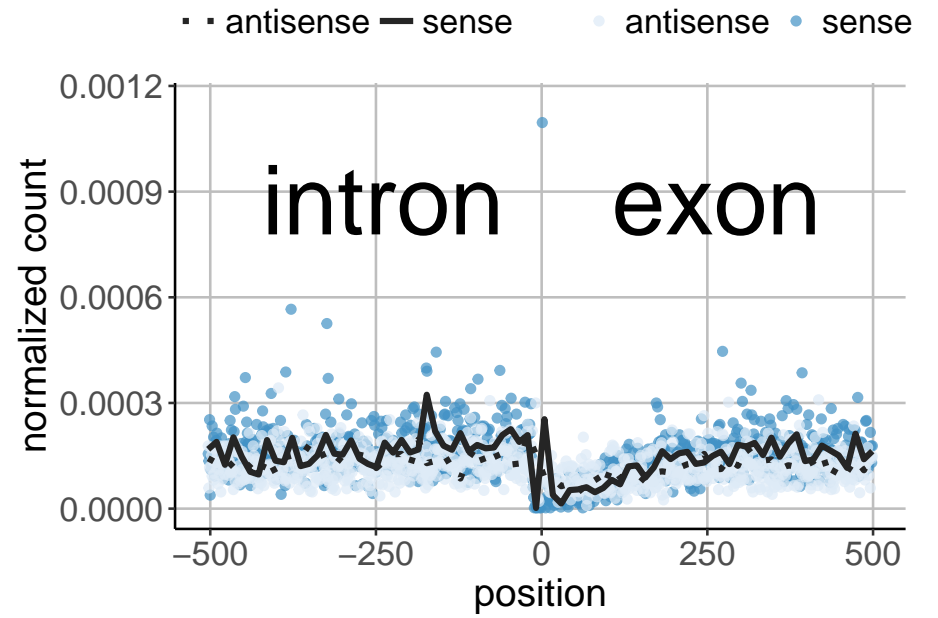

HNRNPCL1-GUUUUUUGGG

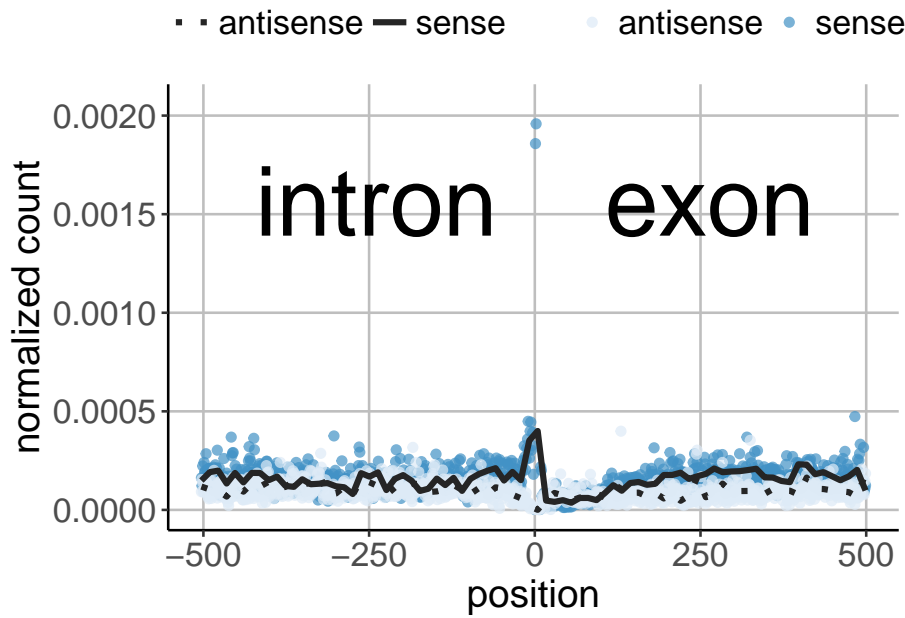

ZFR\_4-GUGACGGAUG

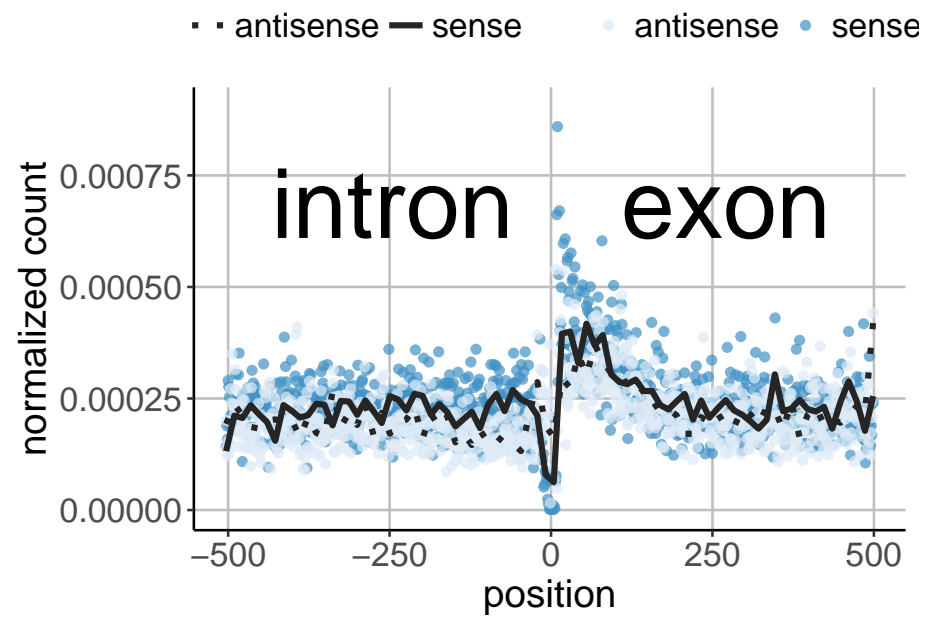

ZFR\_4-GUGC GGAUGN

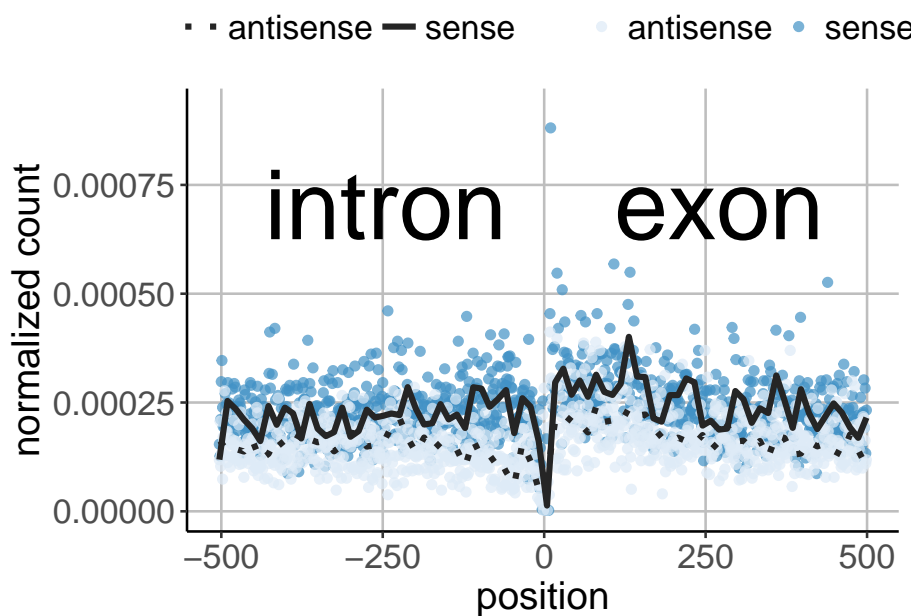

HNRPLL-GCAURCAYCC

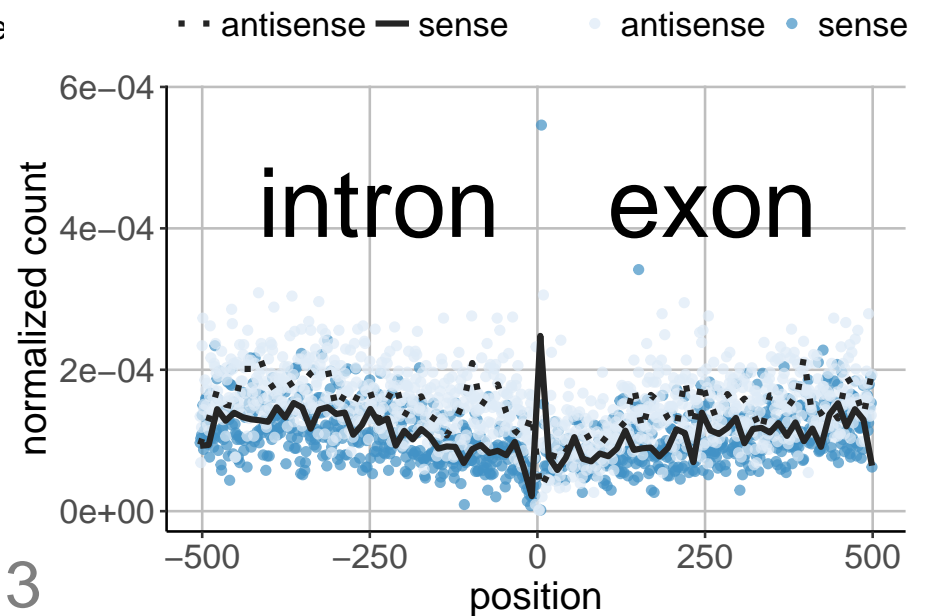

**ACCEPTOR**

ZC3H12C-NUGCGNCAGUCGGUAGC

• antisense — sense    • antisense • sense

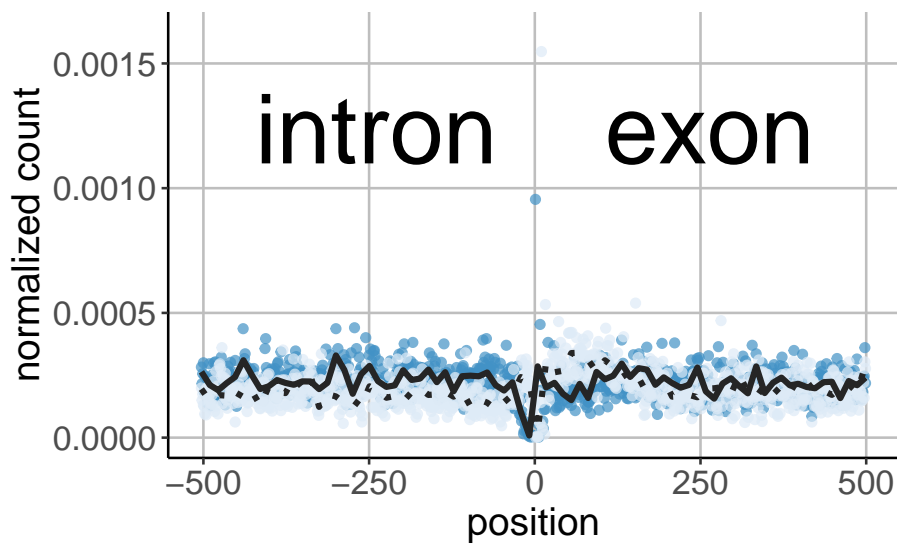

HNRNPL\_2-ACAUWWCAUW

• antisense — sense    • antisense • sense

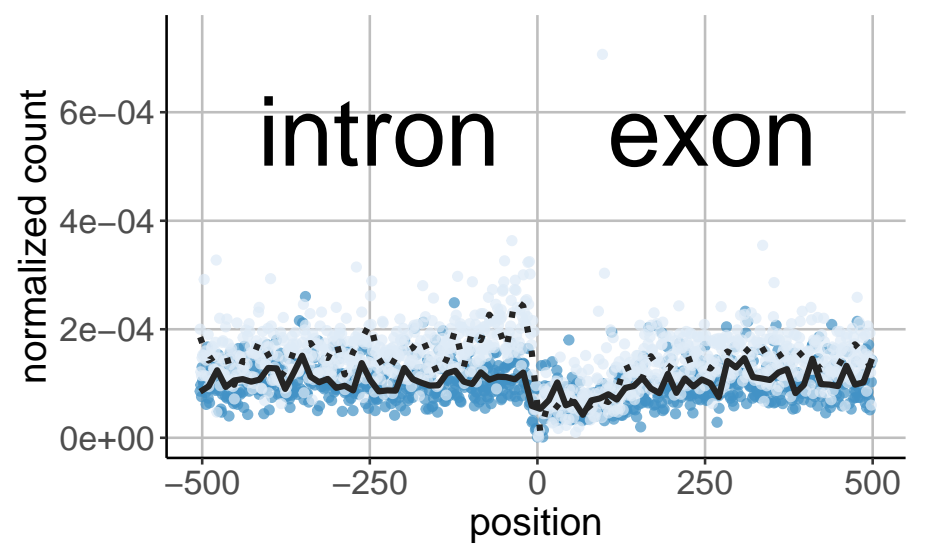

RBMS2-CAGUGAUUGG

• antisense — sense    • antisense • sense

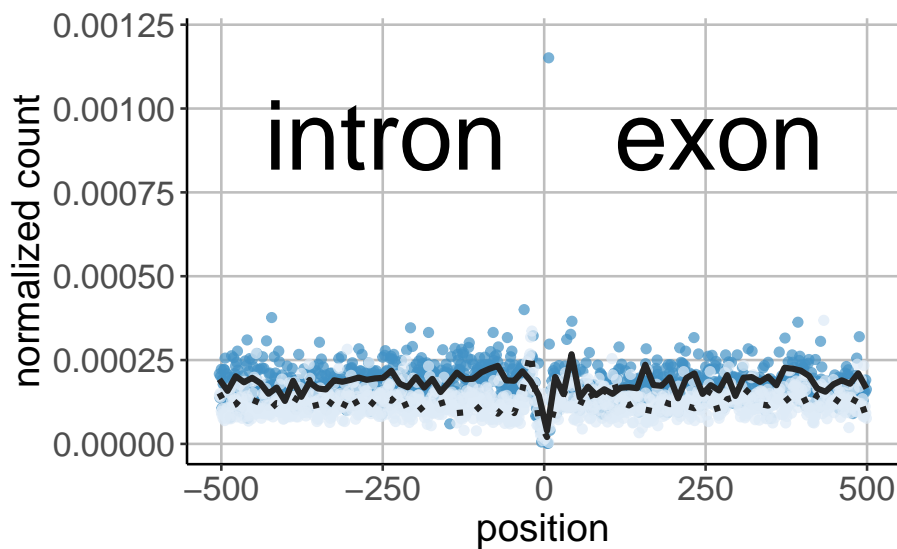

RBM14-GGKUGCGUCG

• antisense — sense    • antisense • sense

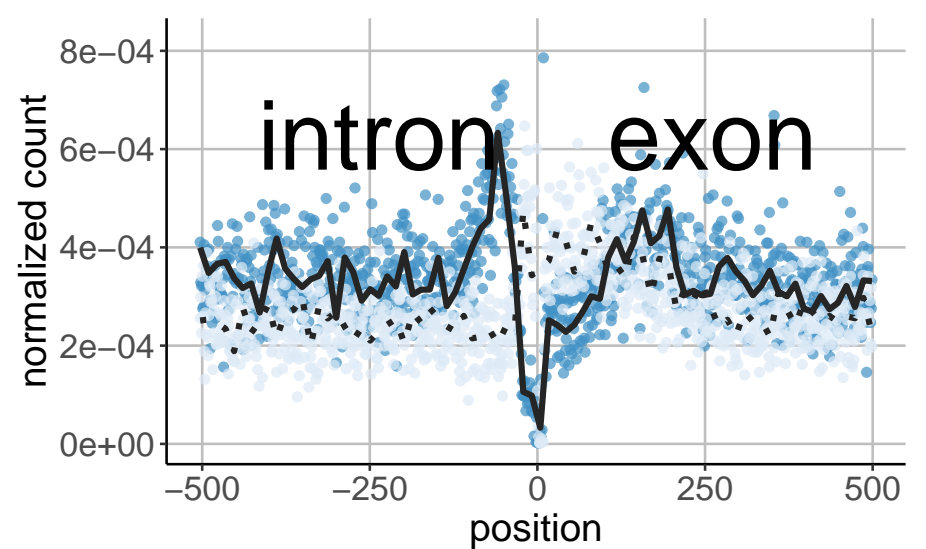

RBMS2-CGUAUAUAG

• antisense — sense    • antisense • sense

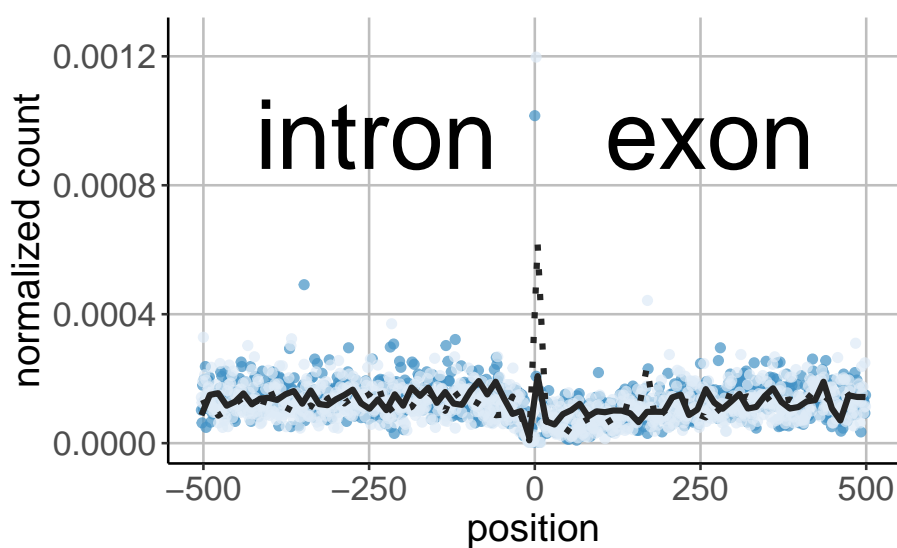

RBMS1-GUAUUUAKNGGG

• antisense — sense    • antisense • sense

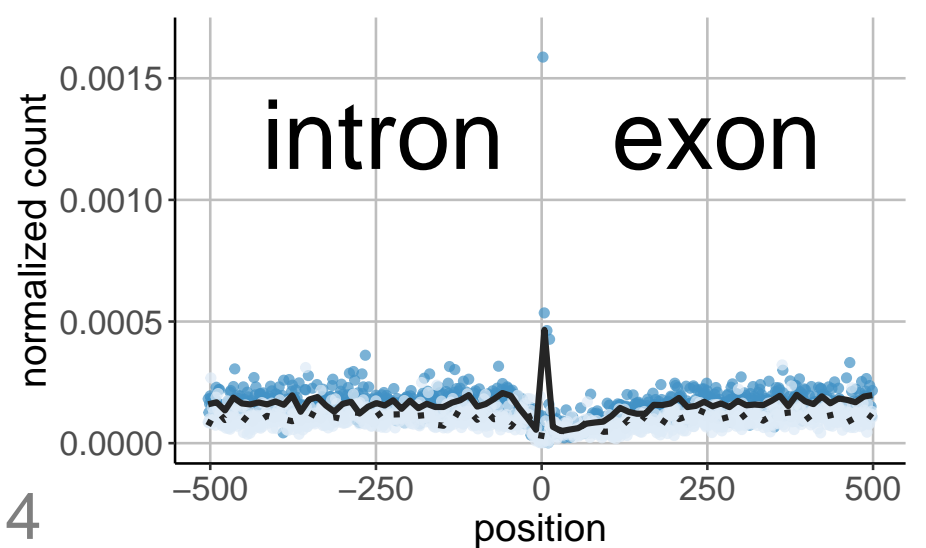

ACCEPTOR

RBMS1-UUAUAAUCAAC

•• antisense — sense    • antisense • sense

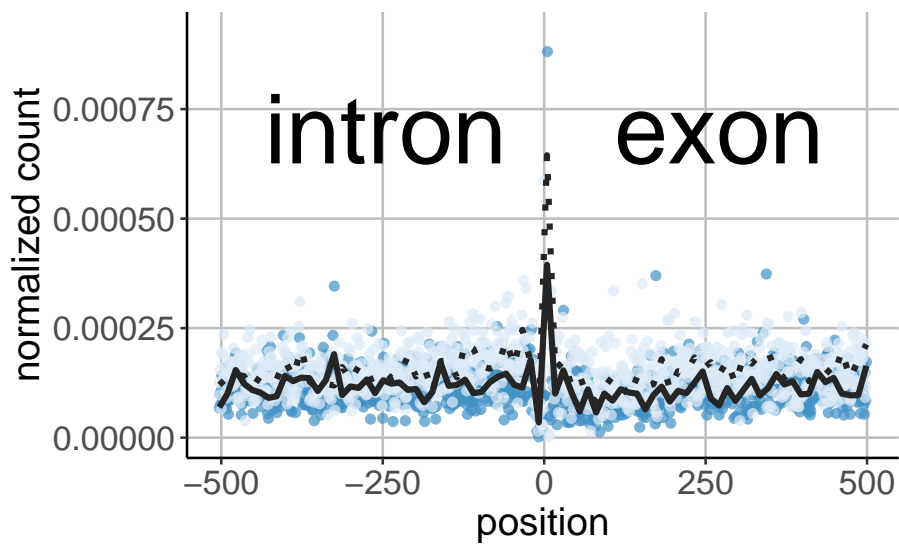

NOVA2\_3-UCAUUCAU

•• antisense — sense    • antisense • sense

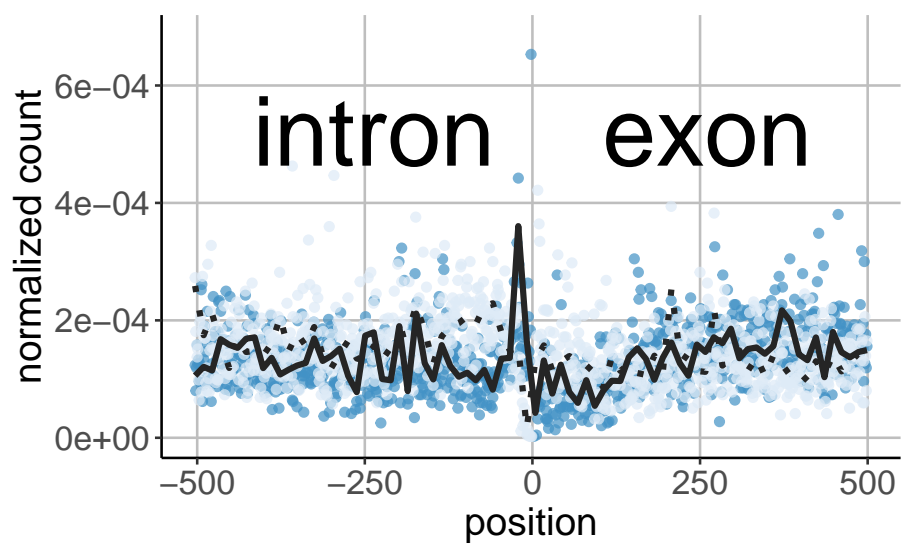

ZFP36-KUAUUUAUGGUGG

•• antisense — sense    • antisense • sense

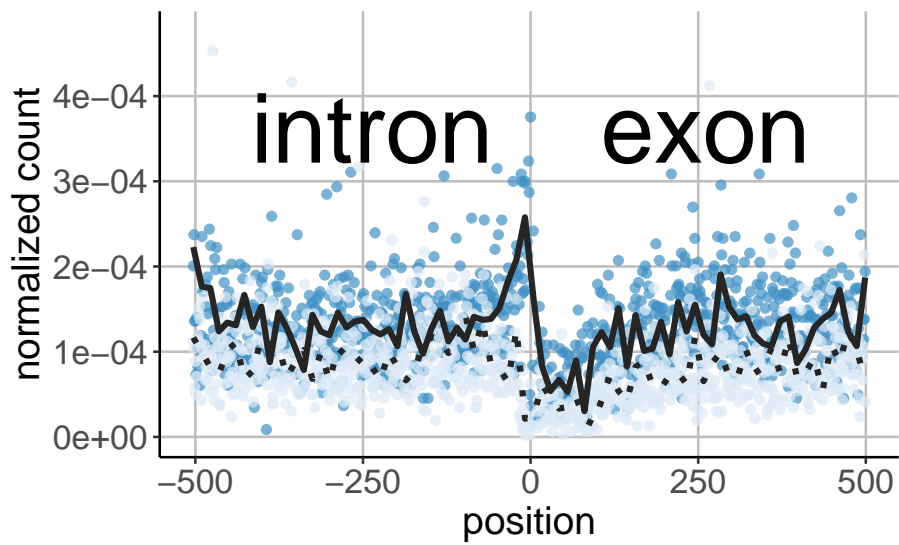

ZFP36-UUAUUUUAUU

•• antisense — sense    • antisense • sense

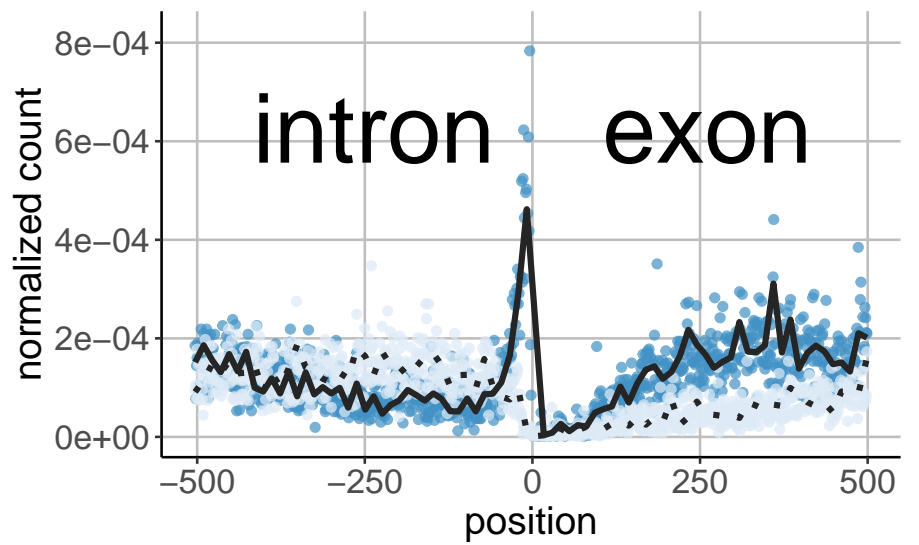

ELAVL4-UUUUAUUUUUG

•• antisense — sense    • antisense • sense

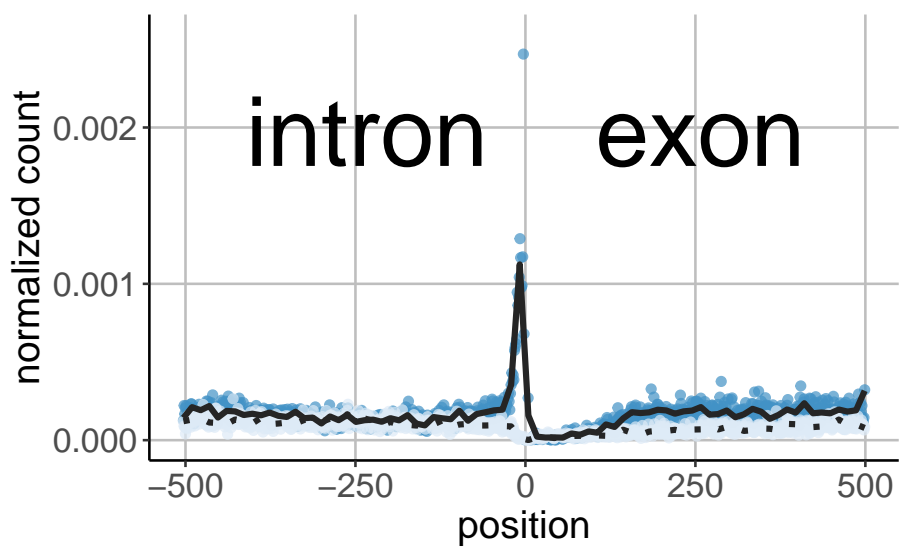

QKI-ACUAACANNACUAACA

•• antisense — sense    • antisense • sense

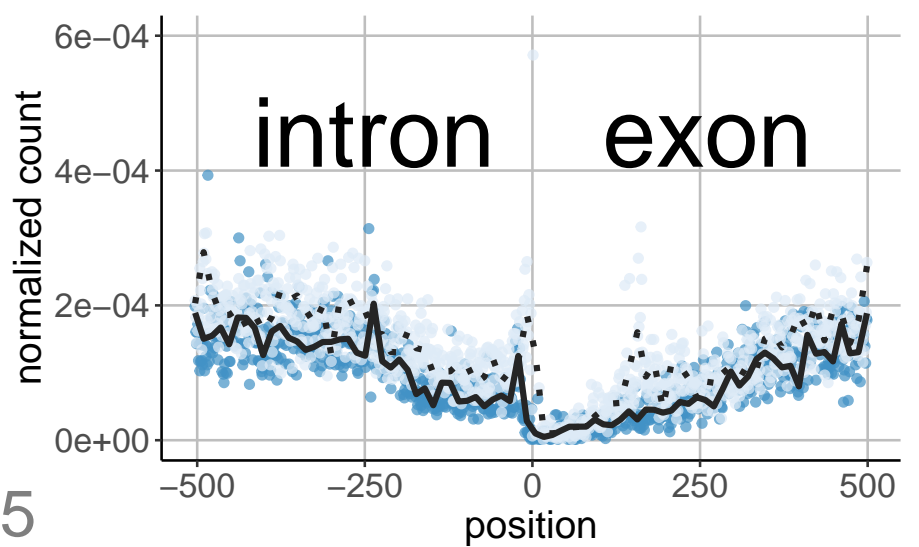

ACCEPTOR

TARDBP-GUGUGAAUGG

•• antisense — sense    • antisense • sense

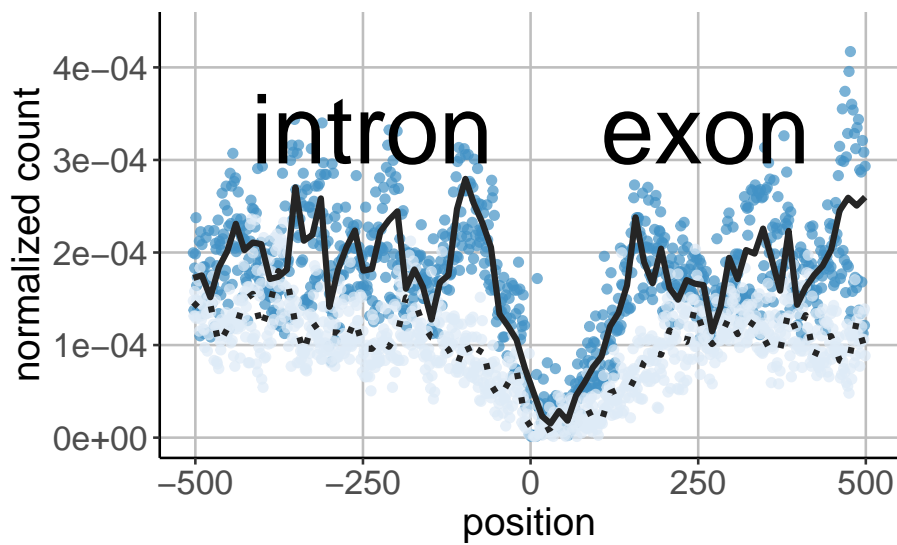

TARDBP-GUGUGNGUGUG

•• antisense — sense    • antisense • sense

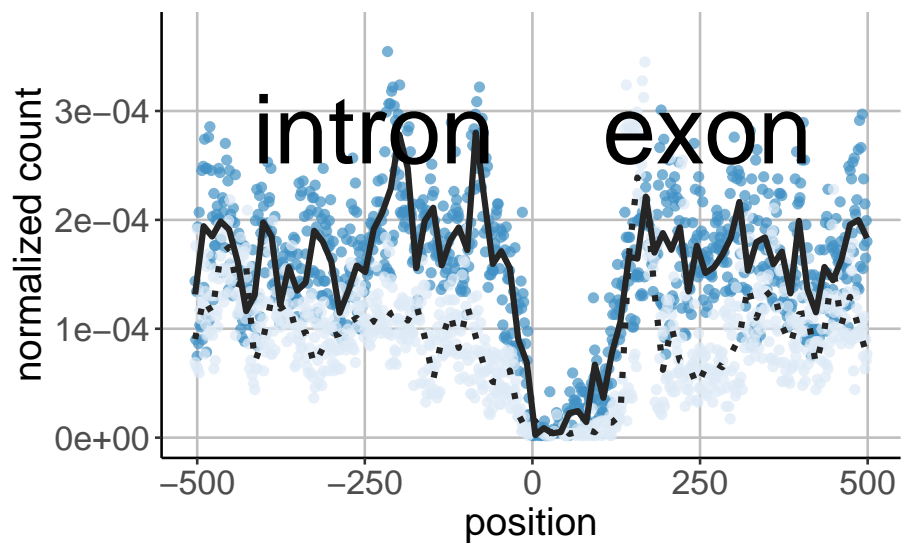

PUM2-NNUGUAYAGK

•• antisense — sense    • antisense • sense

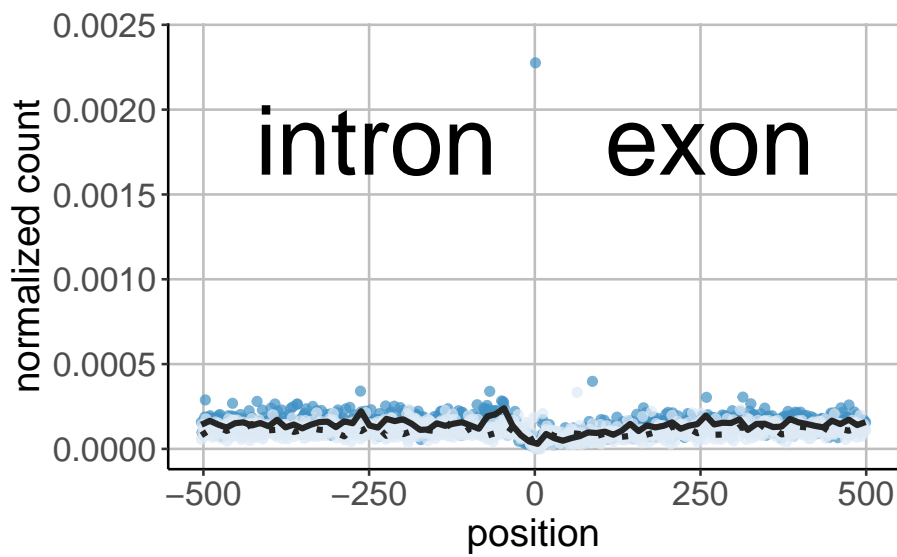

PUM2-NUGUAAAUAAGKN

•• antisense — sense    • antisense • sense

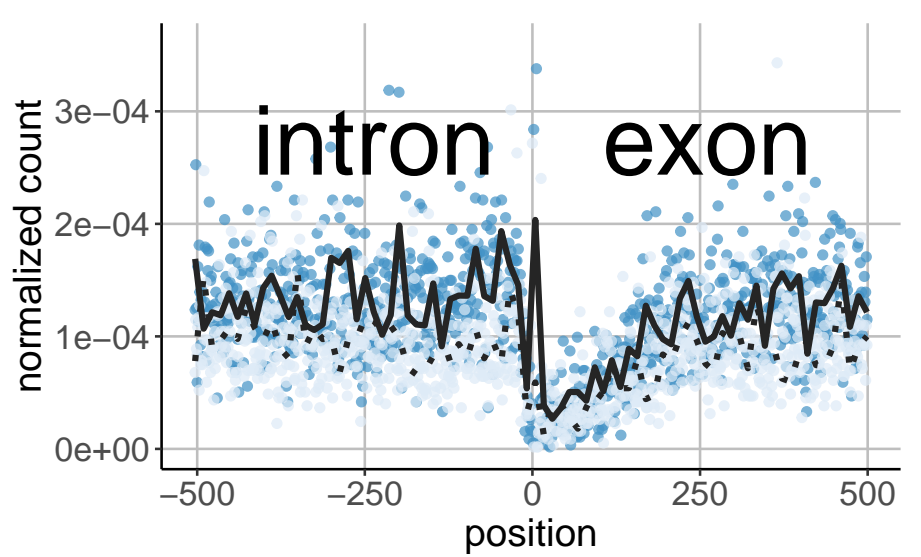

KHDRBS3-UAAANNNNNNUAAA

•• antisense — sense    • antisense • sense

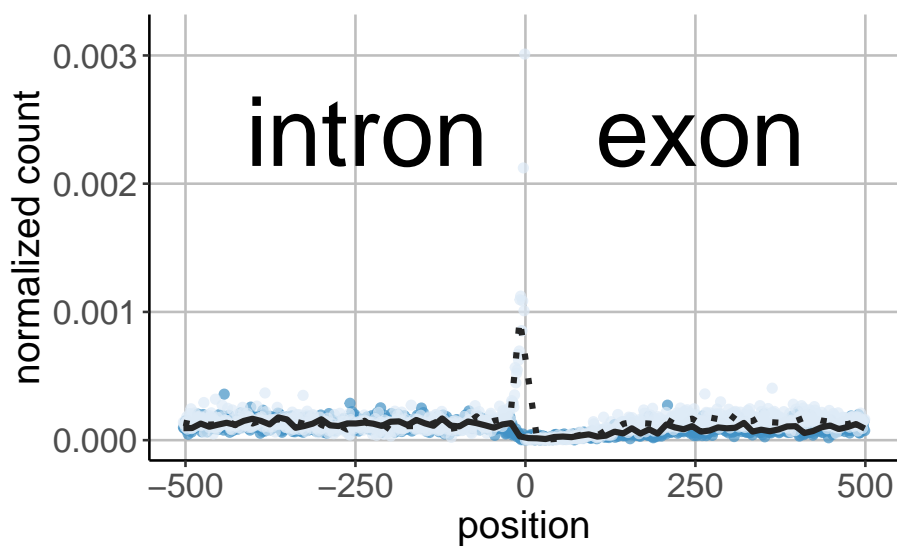

THUMPD1-UUCGUGGCUUG

•• antisense — sense    • antisense • sense

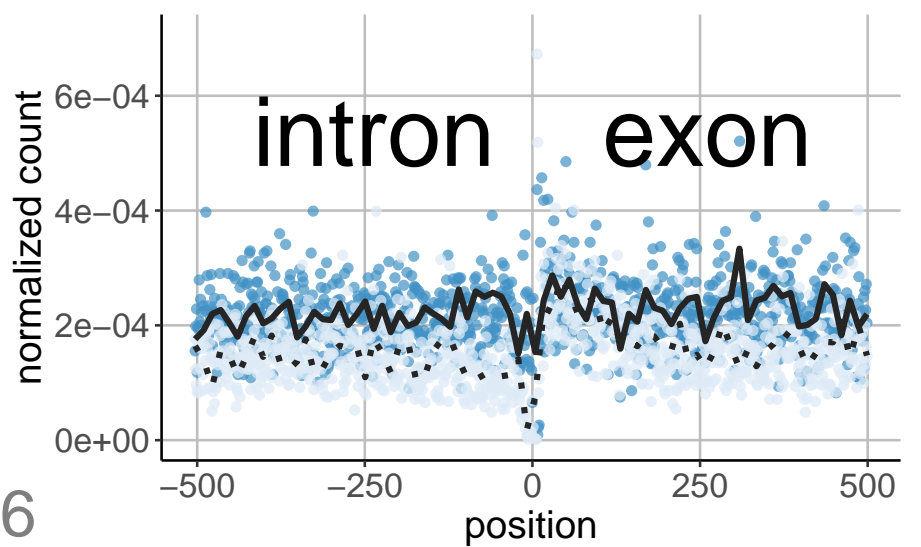

ACCEPTOR

THUMPD1-WGCGCGGUYUU

•• antisense — sense    • antisense • sense

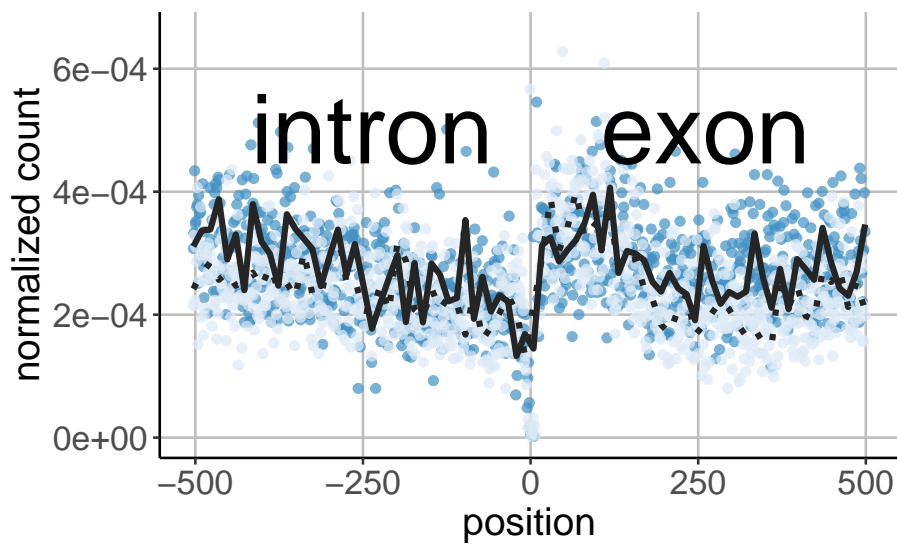

ZFR\_4-GGCACGGAUG

•• antisense — sense    • antisense • sense

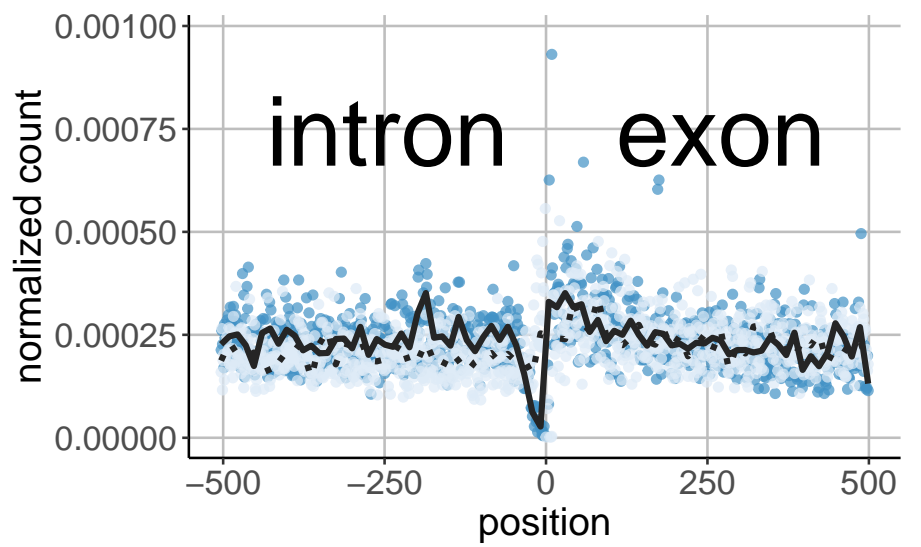

ZFR\_4-UUGCCGGAUGYCGU

•• antisense — sense    • antisense • sense

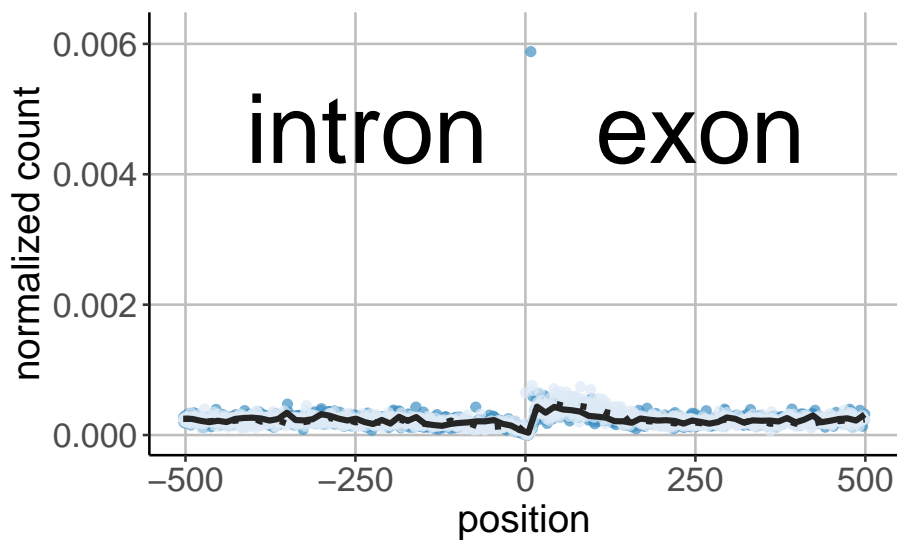

PCBP1-UCCUUNNCCUU

•• antisense — sense    • antisense • sense

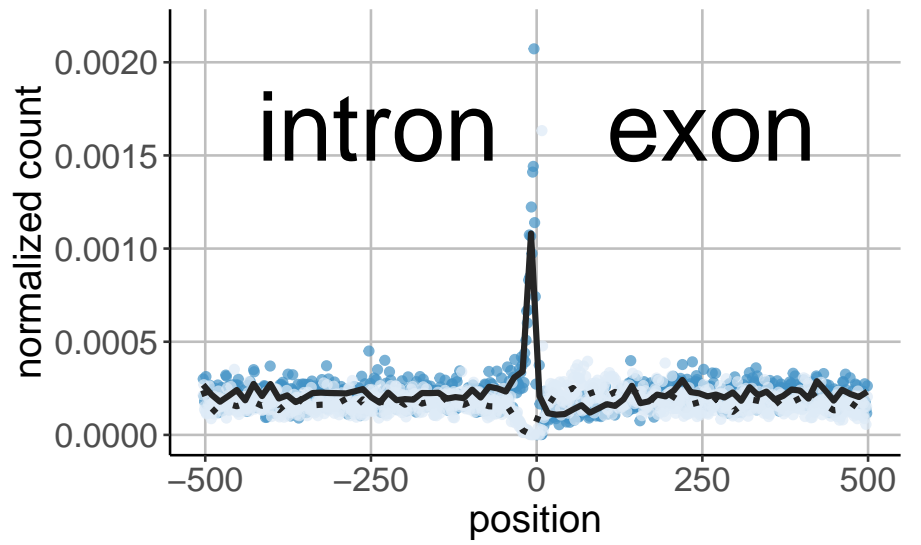

HNRNPA3-UAGGUUAGGG

•• antisense — sense    • antisense • sense

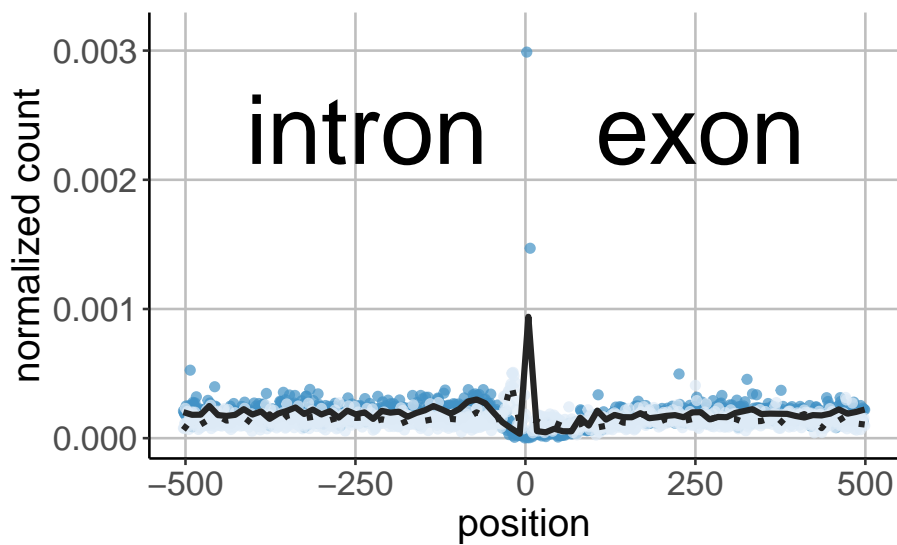

RBM38-KKGUGUGUGUGUKK

•• antisense — sense    • antisense • sense

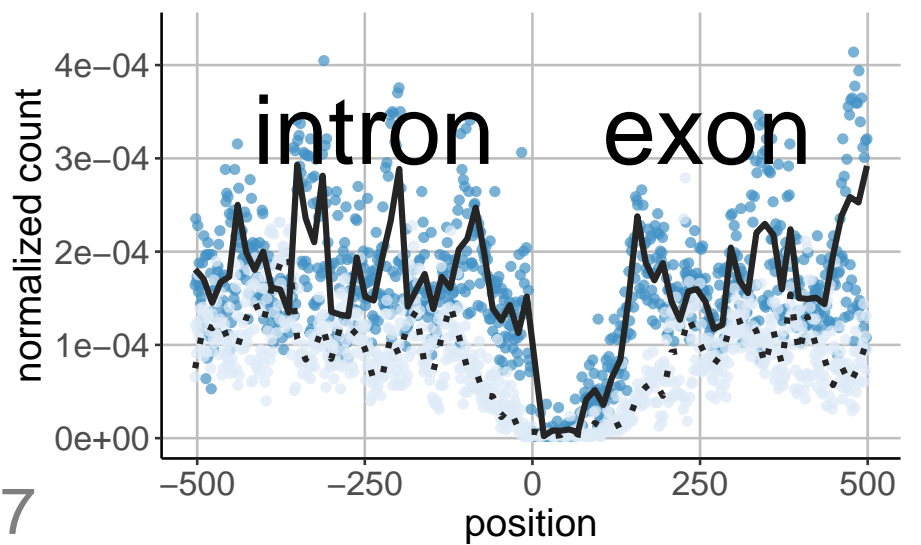



ACCEPTOR

MEX3D-UNURUUUAUU

• antisense — sense    • antisense • sense

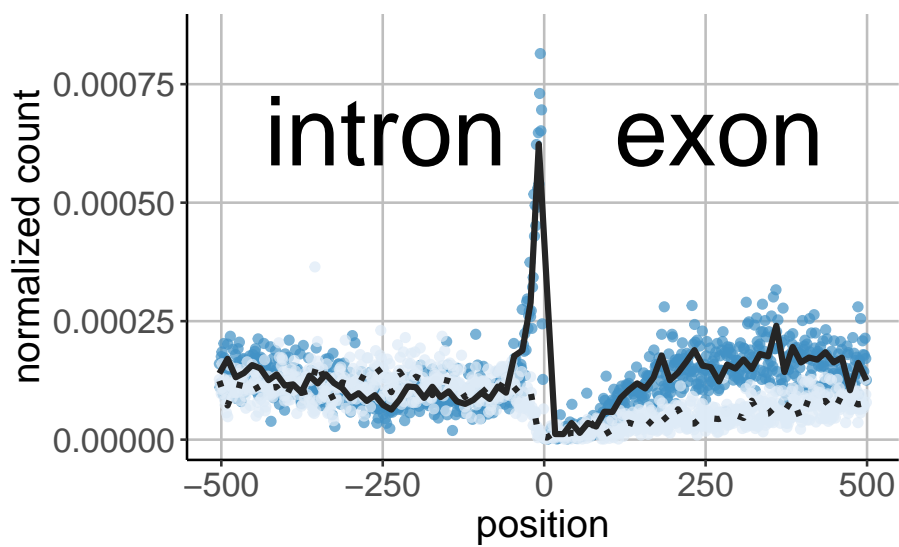

RBPMS2-CACAGNGCACA

• antisense — sense    • antisense • sense

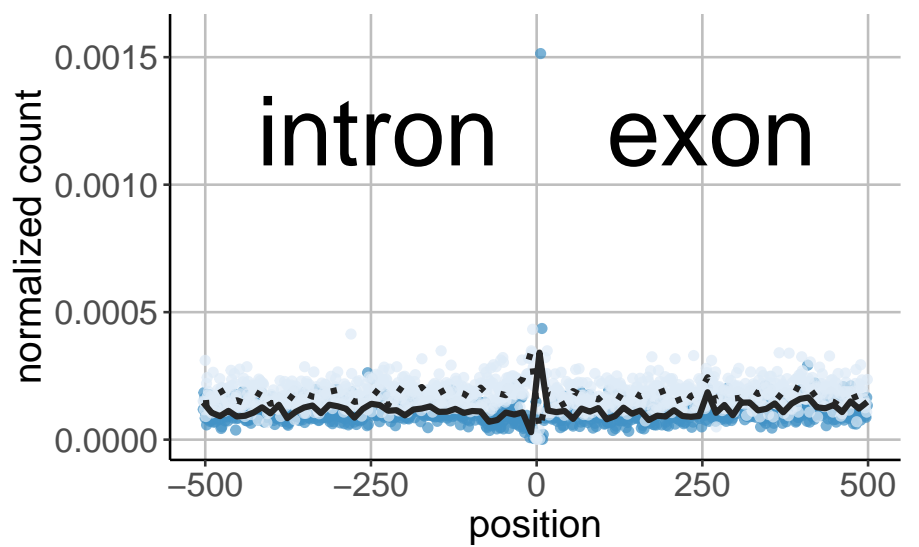

RBPMS2-UCACRUGCACA

• antisense — sense    • antisense • sense

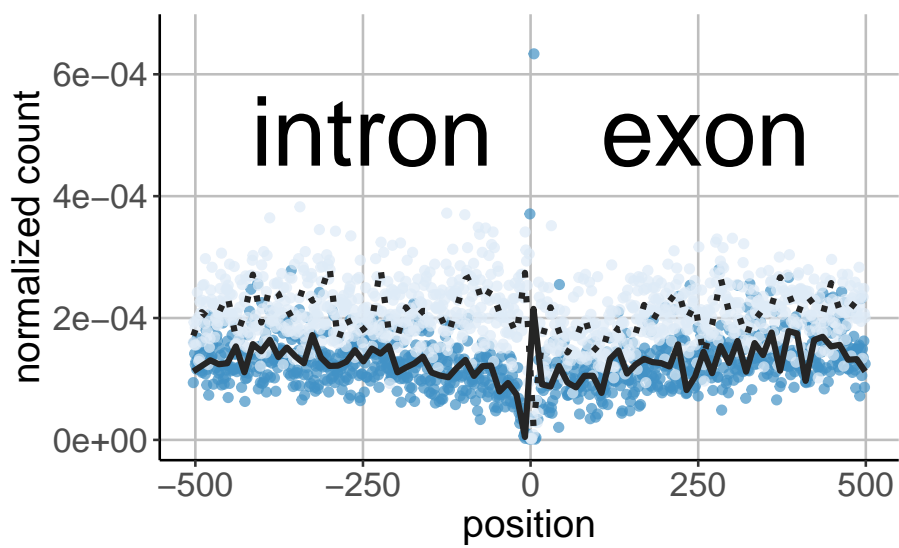

RBPMS2-UGCACA

• antisense — sense    • antisense • sense

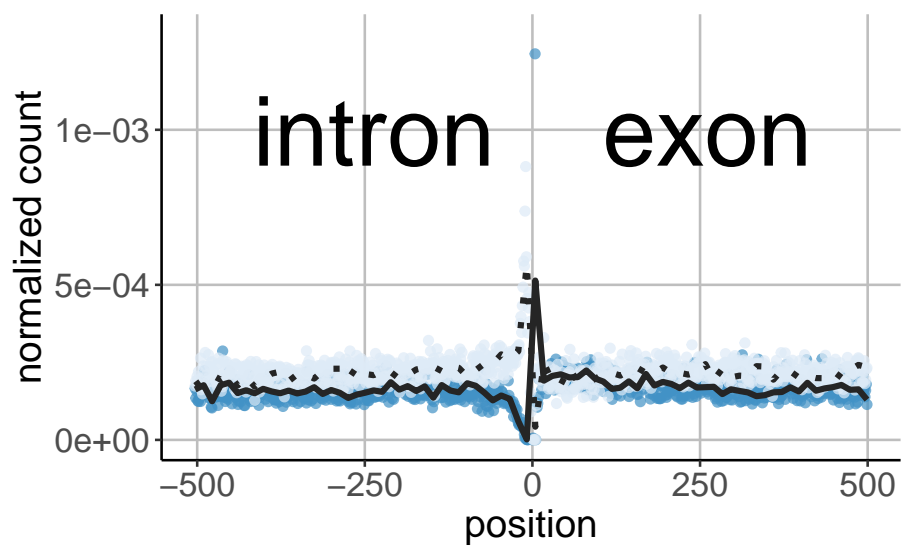

YBX2-GCCAUNNNAUCGC

• antisense — sense    • antisense • sense

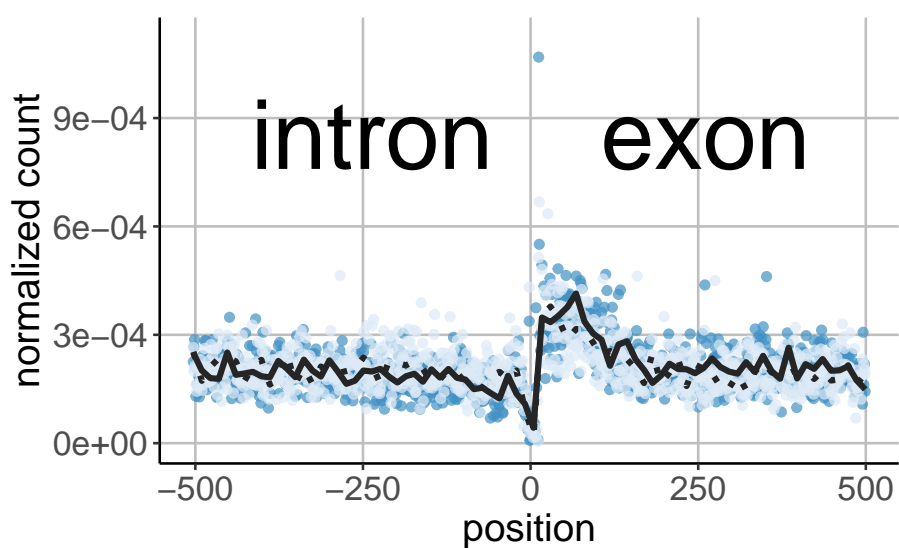

YBX2-NUAACAUCNN

• antisense — sense    • antisense • sense

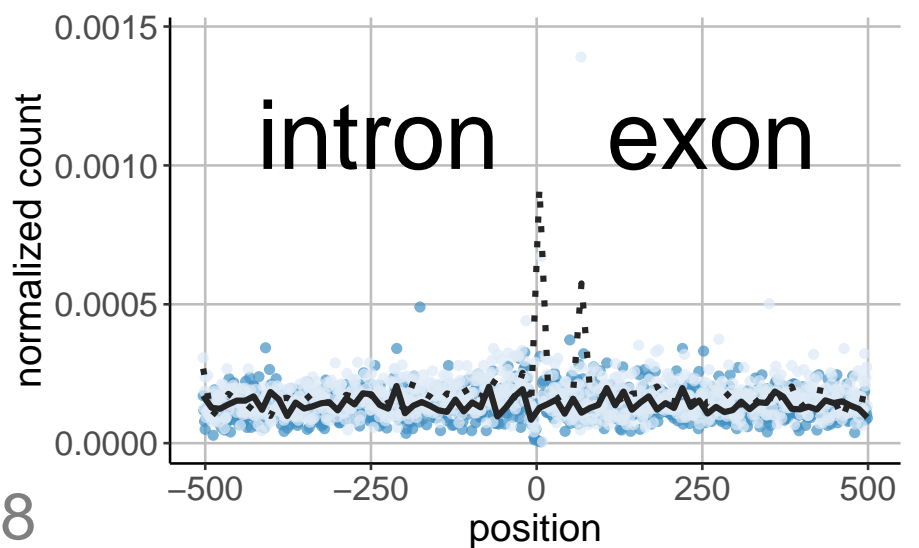

ACCEPTOR

CSTF2T-CGUAGCGUCU

•• antisense — sense    • antisense • sense

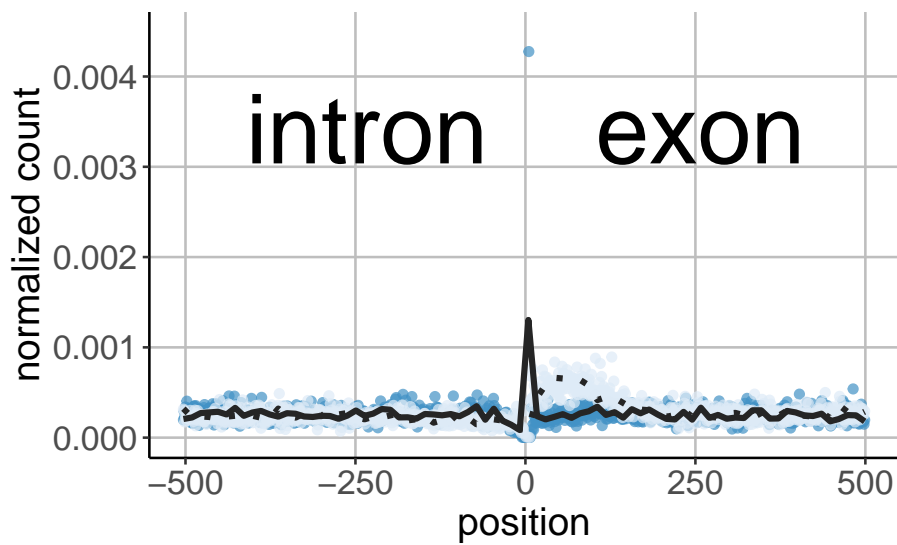

SNRNP70-GNUCANGNNG

•• antisense — sense    • antisense • sense

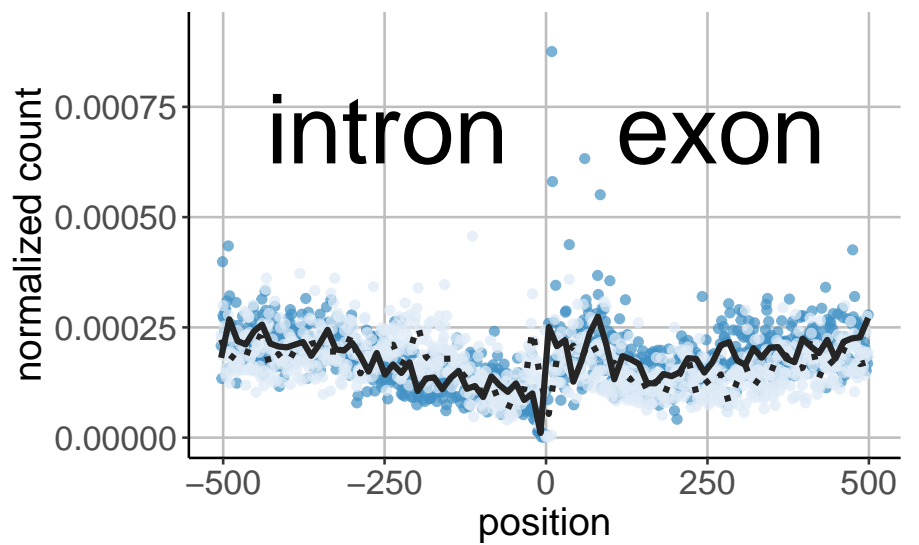

SNRNP70-GUUCAAGGUG

•• antisense — sense    • antisense • sense

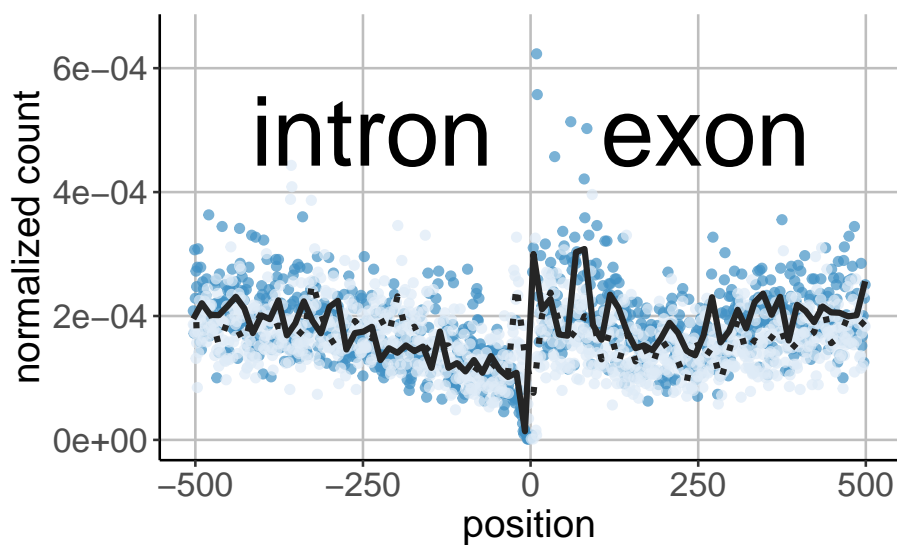

DAZ4-GYUCUAGUUAGYAUC

•• antisense — sense    • antisense • sense

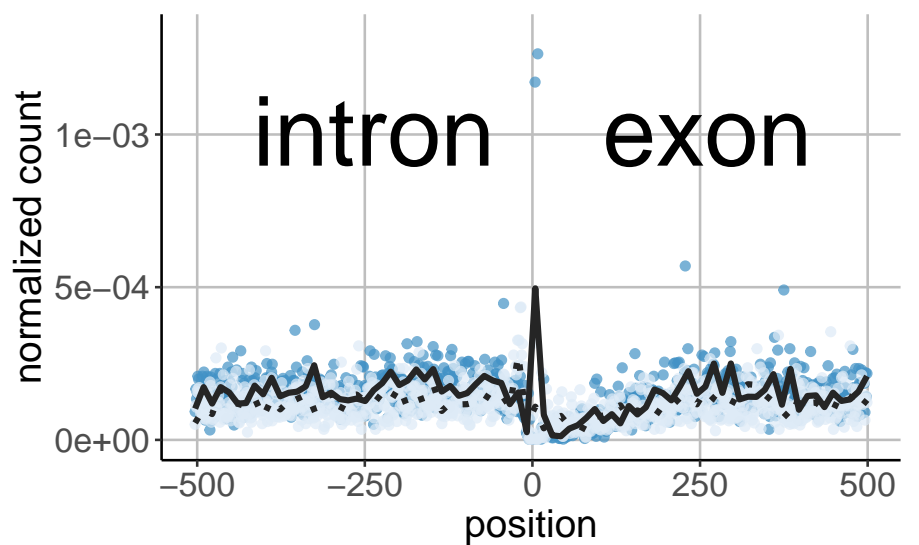

IGF2BP1-CAGNUWCA

•• antisense — sense    • antisense • sense

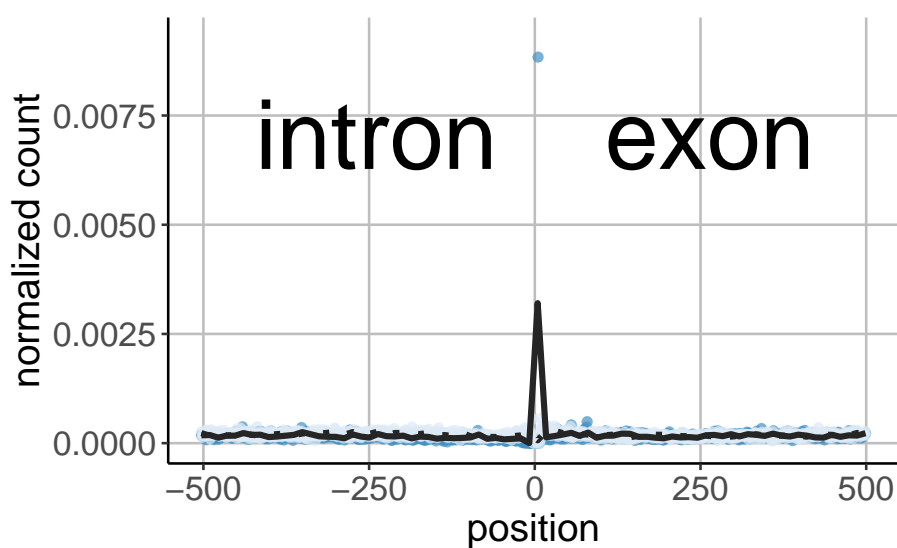

HEXIM2-NGCGACGGKN

•• antisense — sense    • antisense • sense

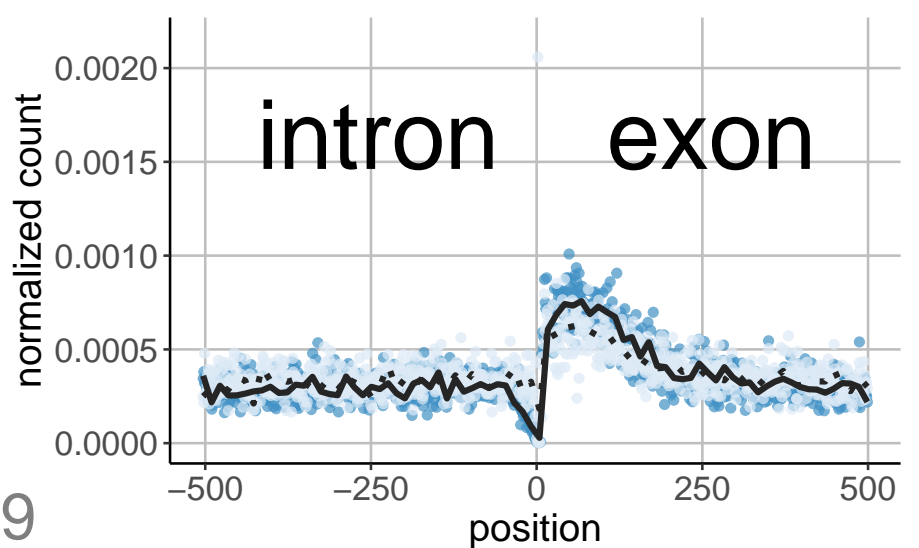

ACCEPTOR

YBX1-NUAACAUCGGG

• antisense — sense    • antisense • sense

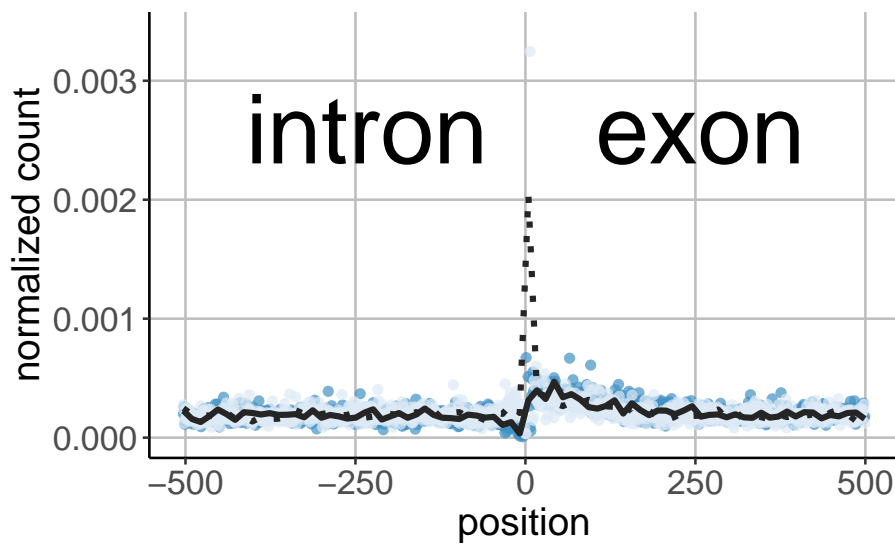

RBM24-GUGUGNGUGUG

• antisense — sense    • antisense • sense

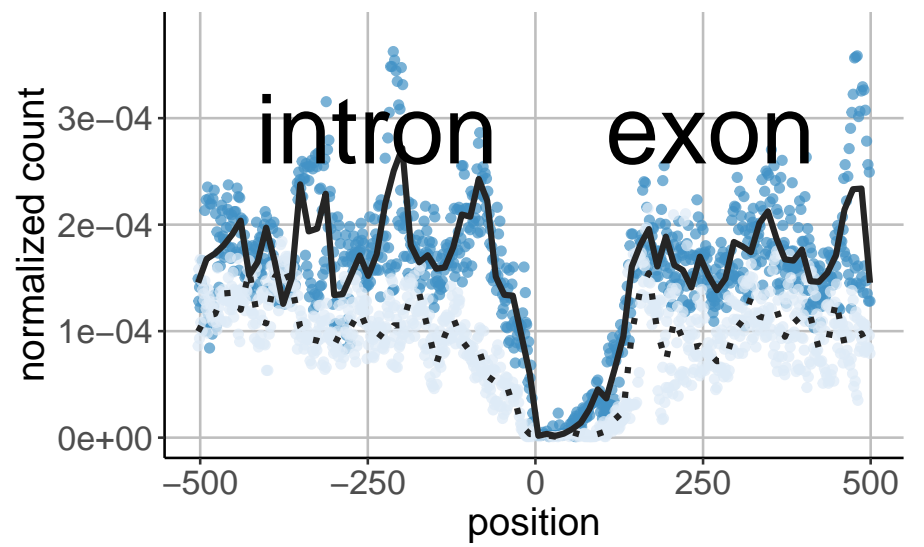

CSDA-UAACAUCA

• antisense — sense    • antisense • sense

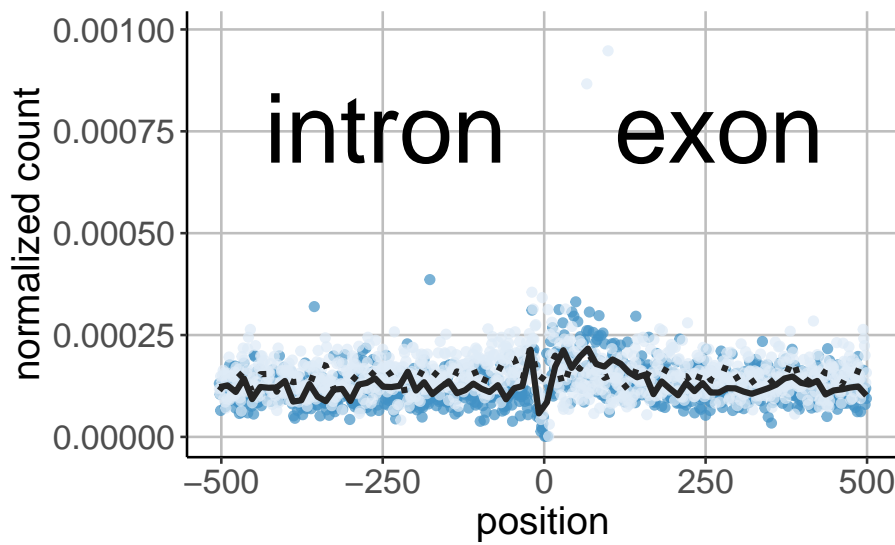

HNRNPA1L2-NUAGGUUAGGGW

• antisense — sense    • antisense • sense

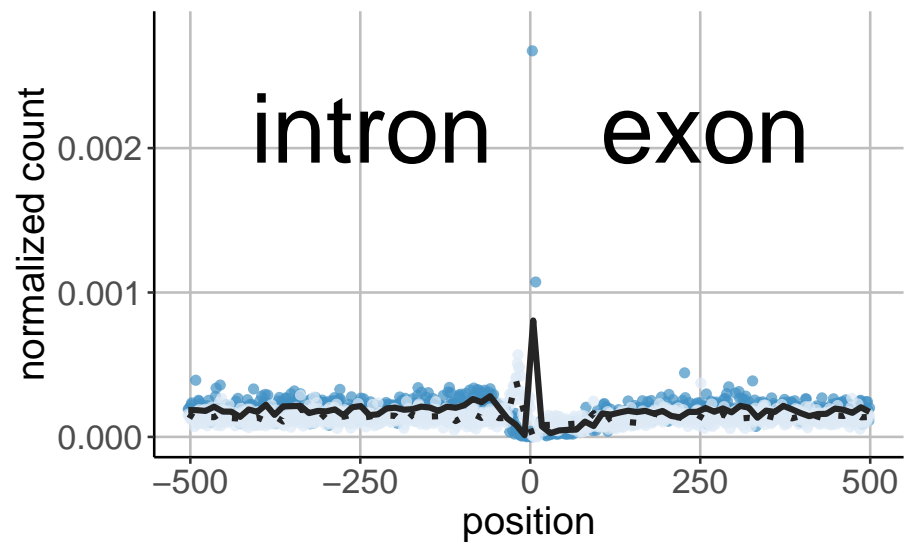

ZC3H12B-NGCGNCAGUCGGUAGCN

• antisense — sense    • antisense • sense

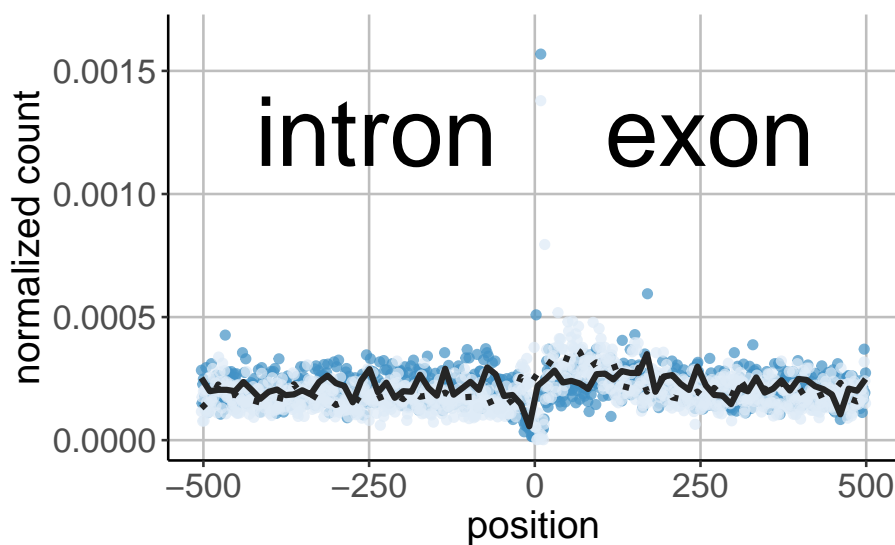

ZC3H12A-NUUGCCAWAGUKU

• antisense — sense    • antisense • sense

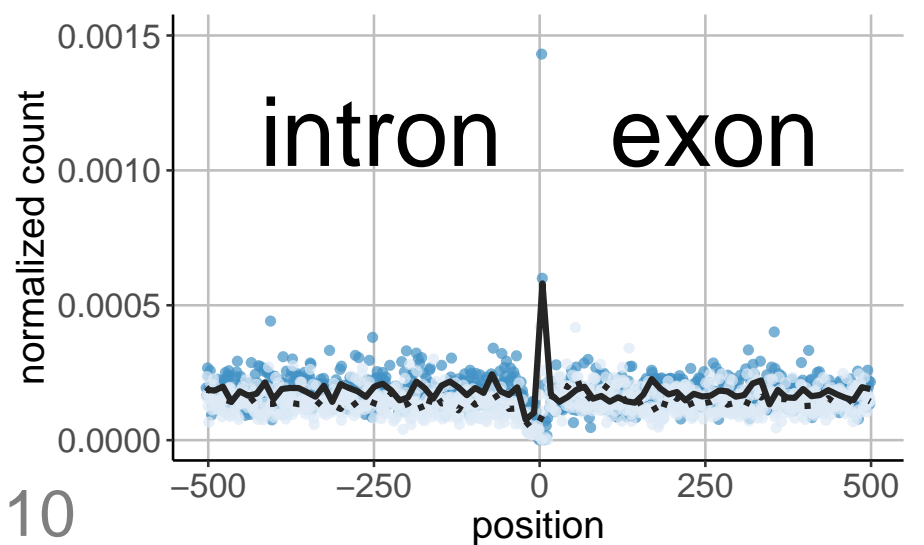

10

ACCEPTOR

DAZAP1-UUAGGUUAGG

• antisense — sense    • antisense • sense

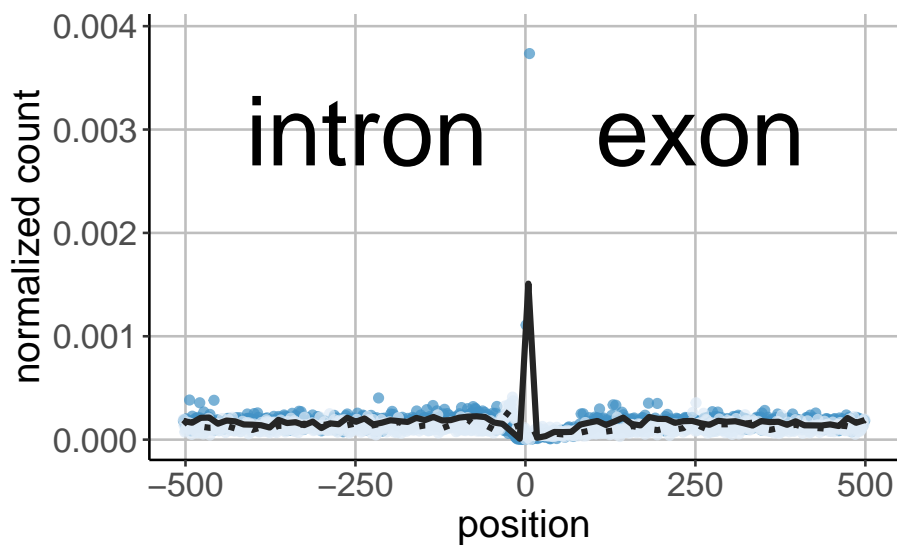

CARHSP1-GCCAUGAUGAU

• antisense — sense    • antisense • sense

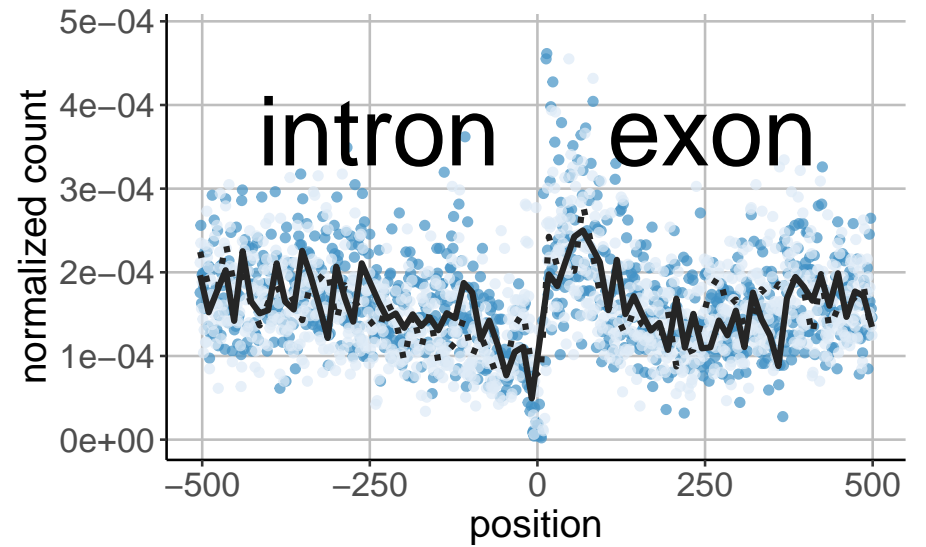

CARHSP1-UUGCCUUGUCCCGAU

• antisense — sense    • antisense • sense

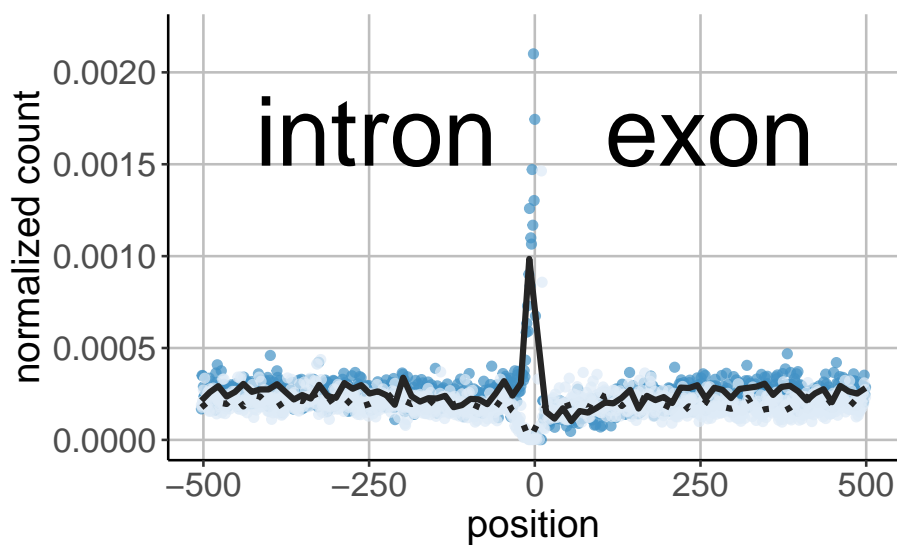

RNPC3-GGGUSUACGGGGU

• antisense — sense    • antisense • sense

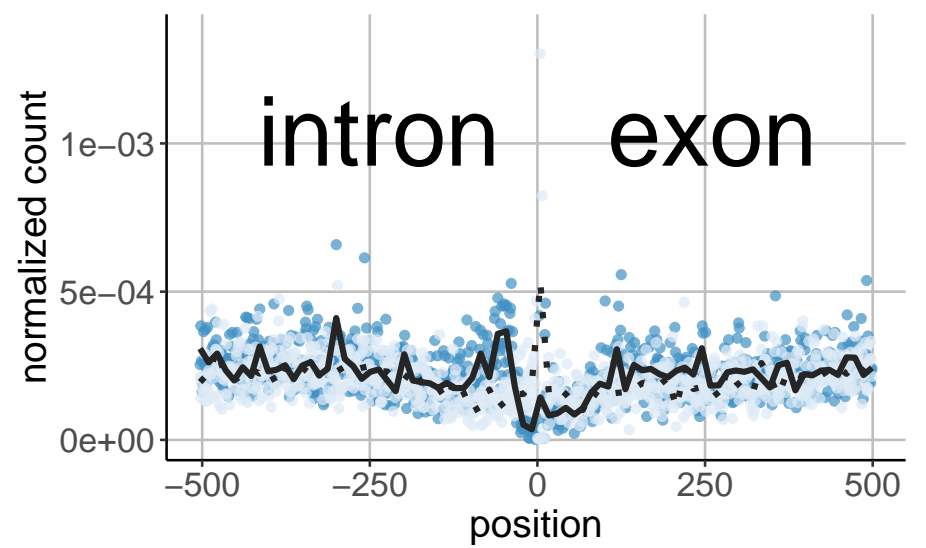

ELAVL1-UUUAUGNUUU

• antisense — sense    • antisense • sense

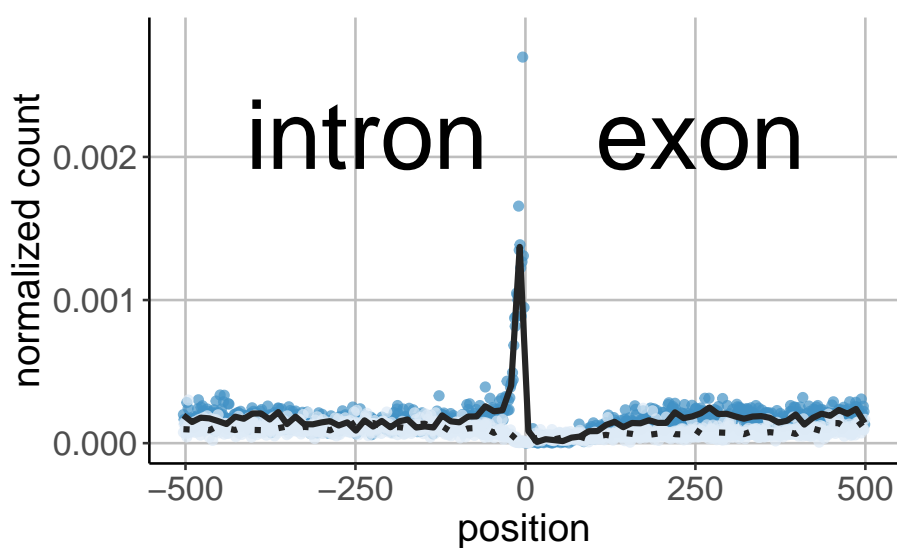

RBM46-GUGAUUG

• antisense — sense    • antisense • sense

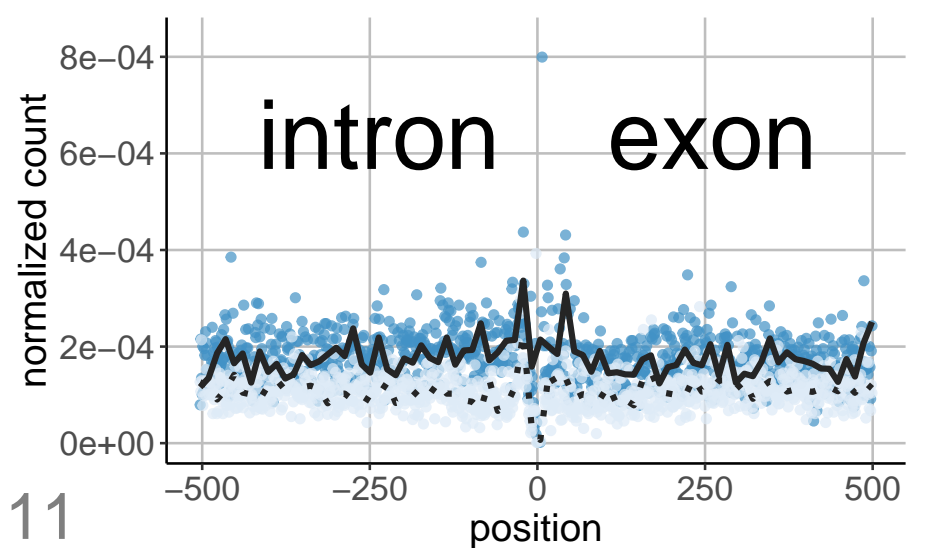

ACCEPTOR

ESRP1\_3-GGUGUGGUGU

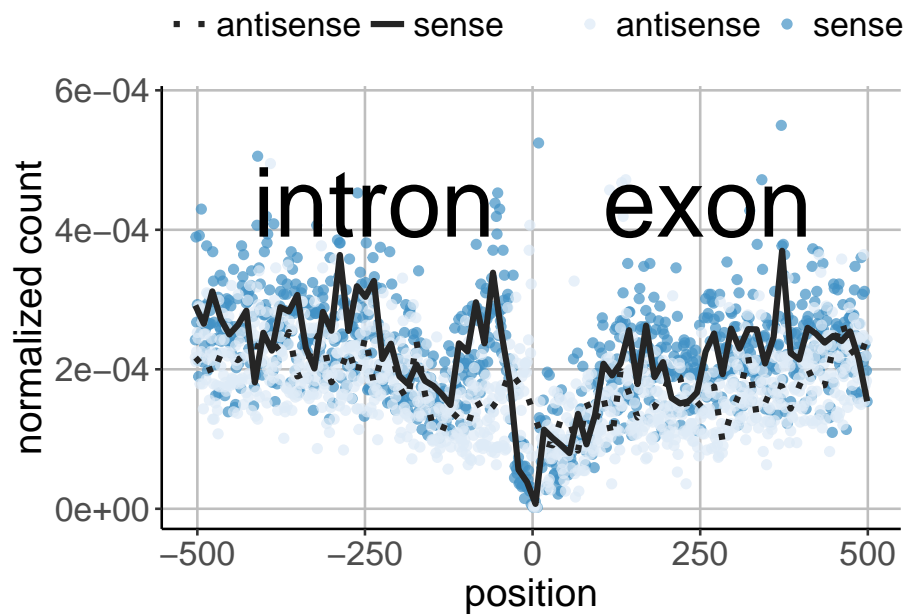

SNRPB2-GGGUGUGCAC

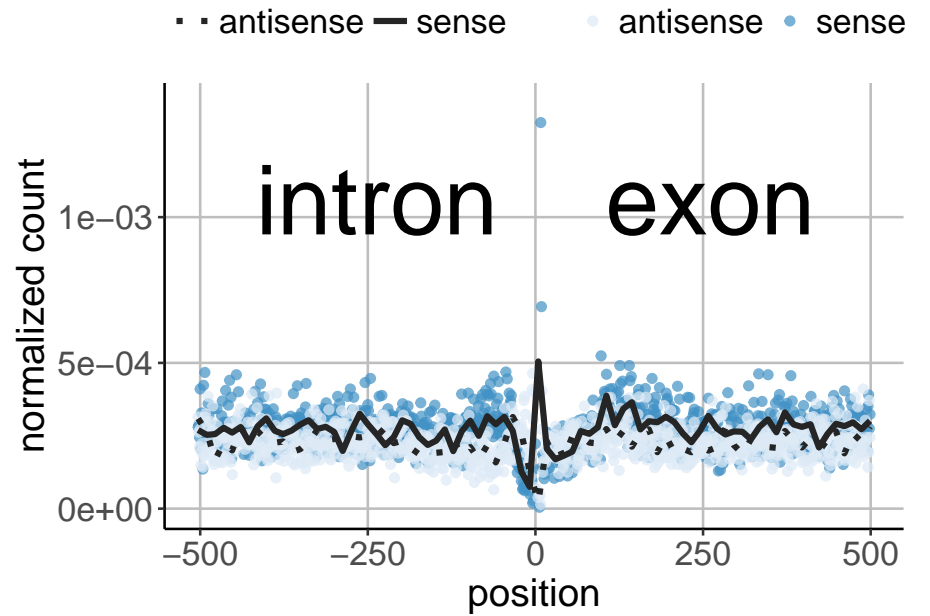

SNRPB2-NNCAUUGCACN

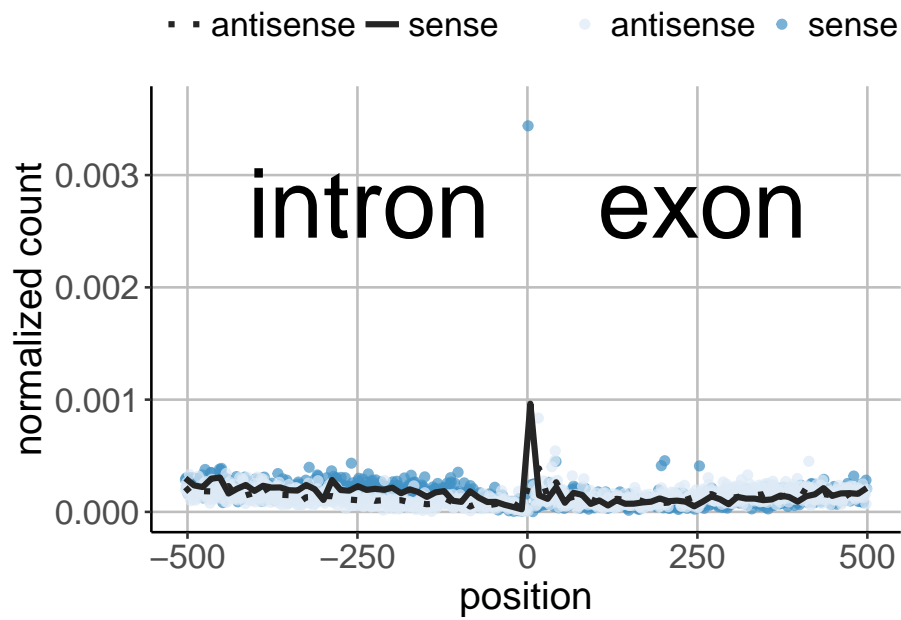

MEX3C-NNAGAGUUUAUNN

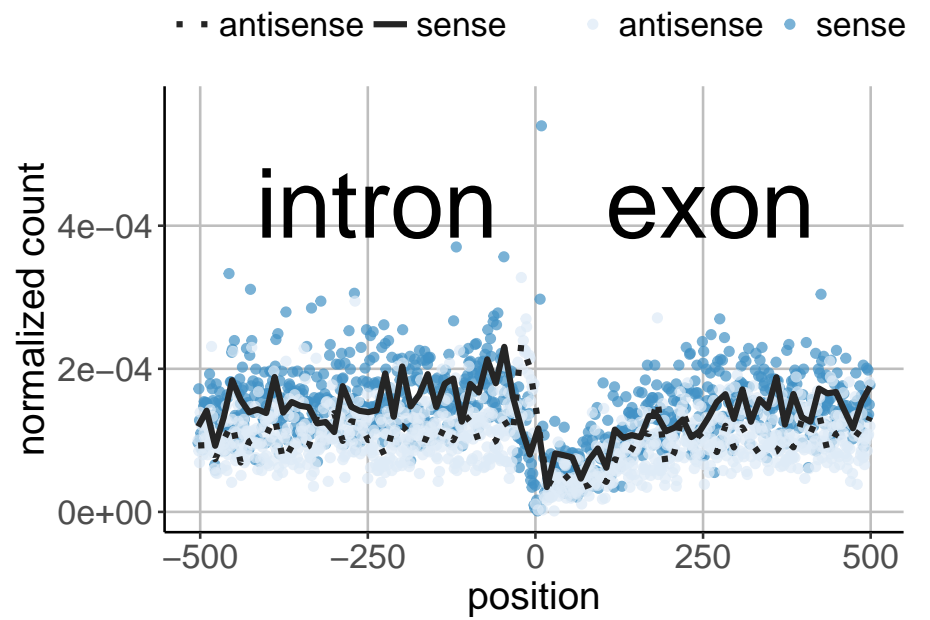

HNRNPA0-KUAGKUUAGGK

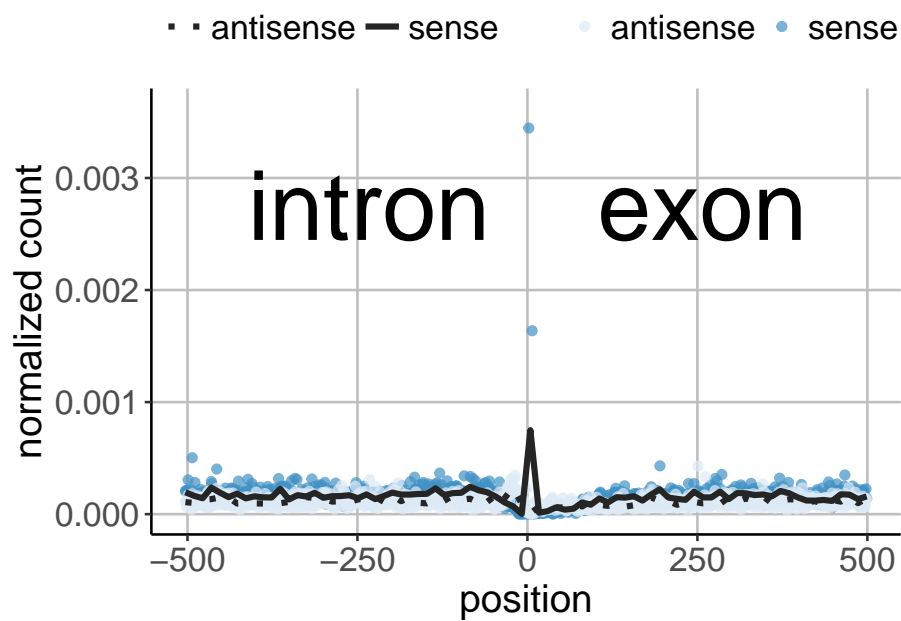

HNRNPA0-KUAGKUUUAGGK

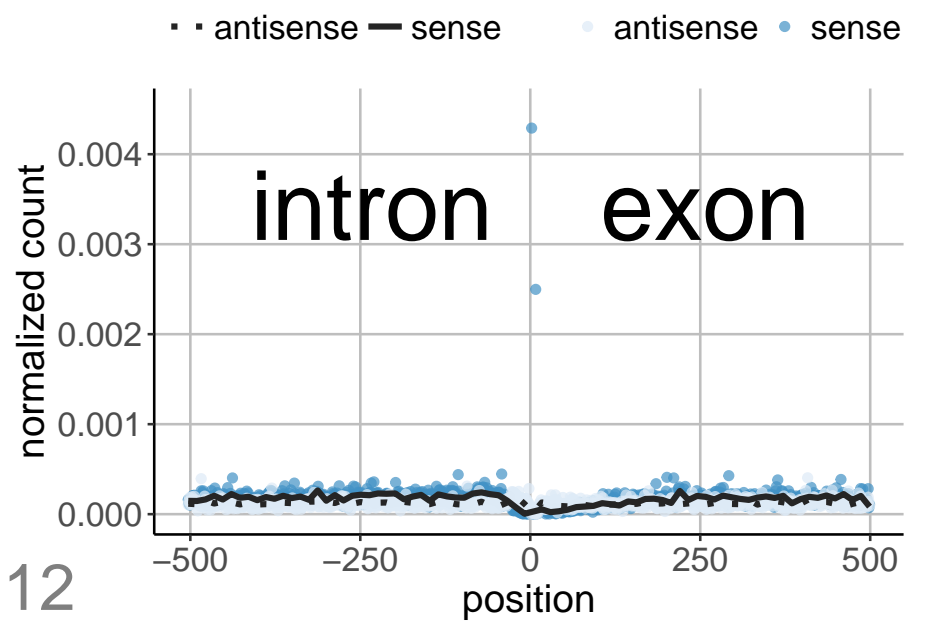

ACCEPTOR

SNRPA-CAUUGCACN

•• antisense — sense    • antisense • sense

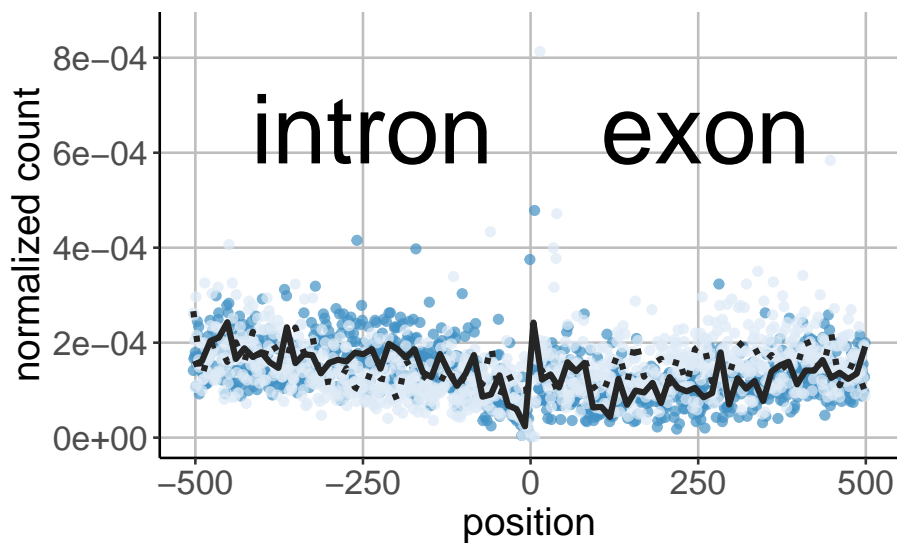

SNRPA-NUGCACR

•• antisense — sense    • antisense • sense

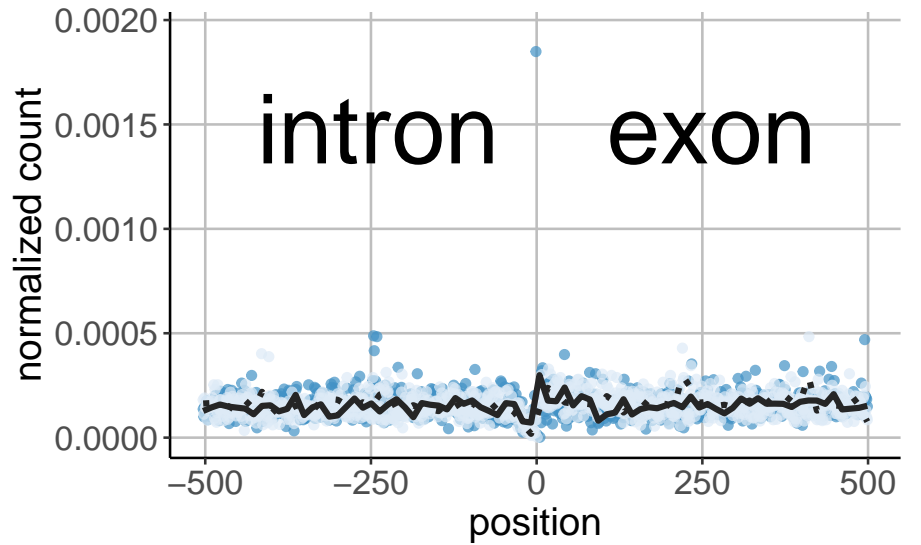

MEX3B\_3-UAGAGUUUUAU

•• antisense — sense    • antisense • sense

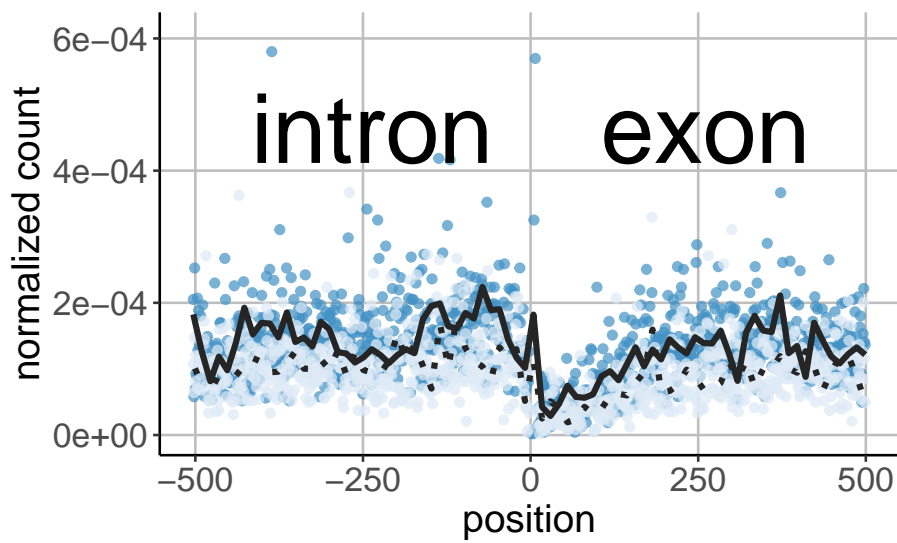

MEX3B\_3-UAUUUUAU

•• antisense — sense    • antisense • sense

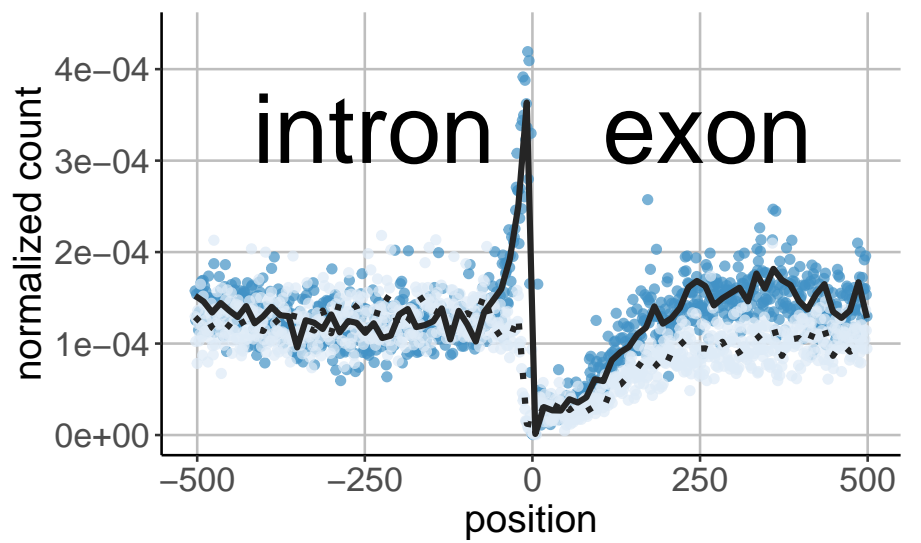

KHDRBS2-UAAACAAUAA

•• antisense — sense    • antisense • sense

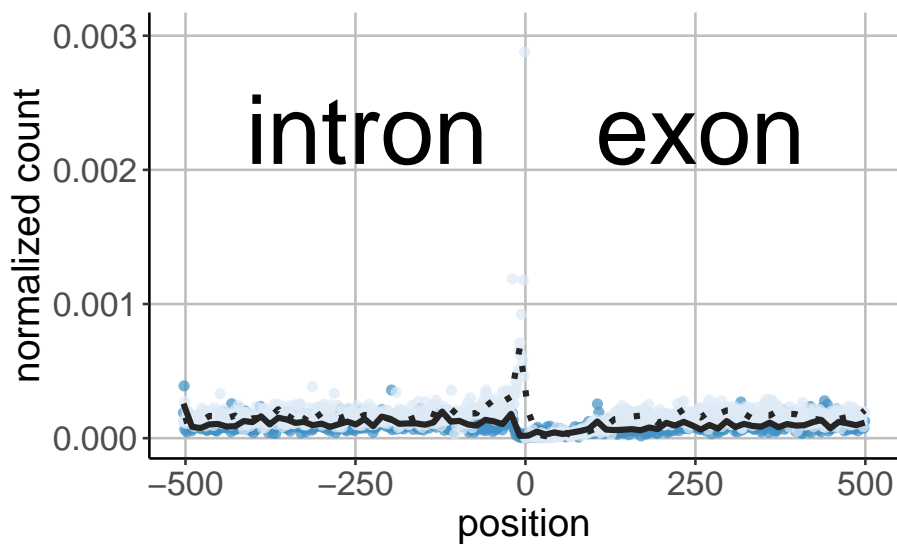

CELF3\_2-UGUGUNUGUGU

•• antisense — sense    • antisense • sense

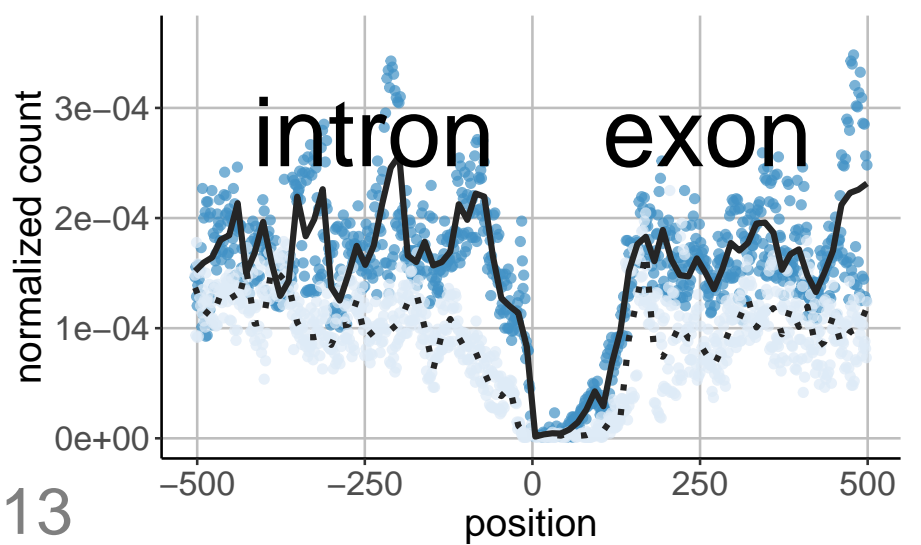

ACCEPTOR

RNPC3-GGGDDGGGDKUACKKGGK

•• antisense — sense    • antisense • sense

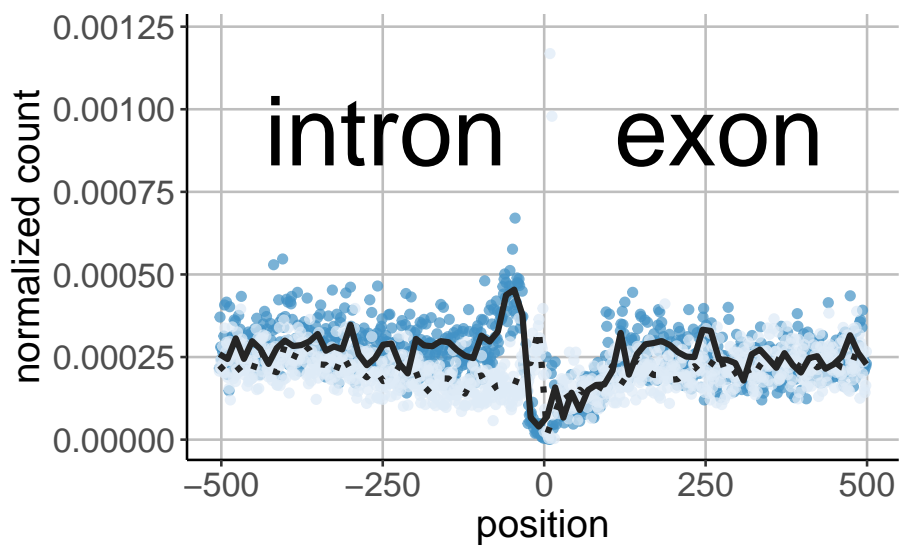

RBM14-UGCGUCG

•• antisense — sense    • antisense • sense

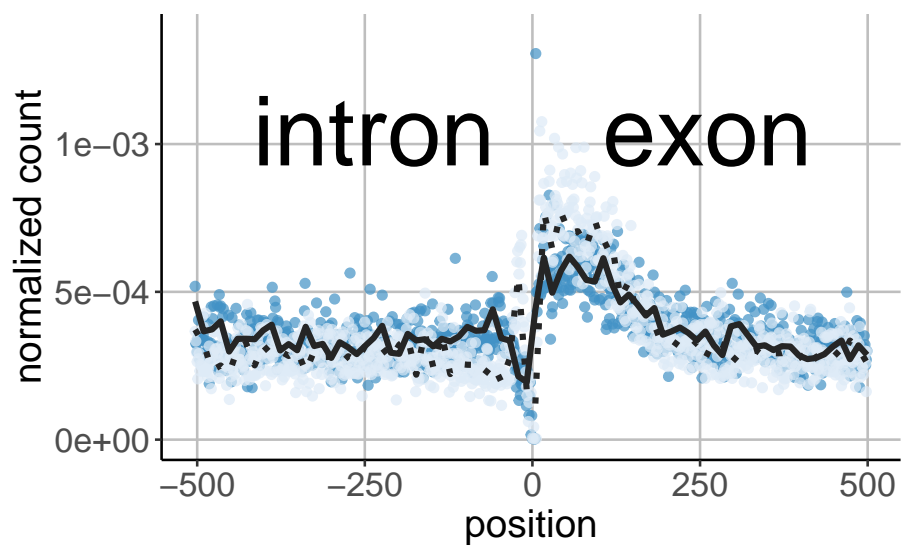

CELF4-UGUGUUGUGU

•• antisense — sense    • antisense • sense

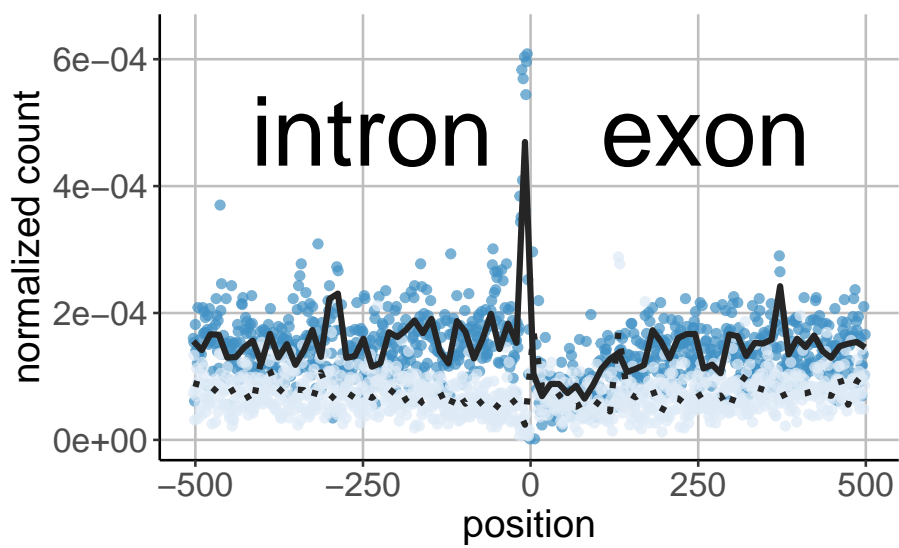

ZRANB2-NNNGGUAAGGUNN

•• antisense — sense    • antisense • sense

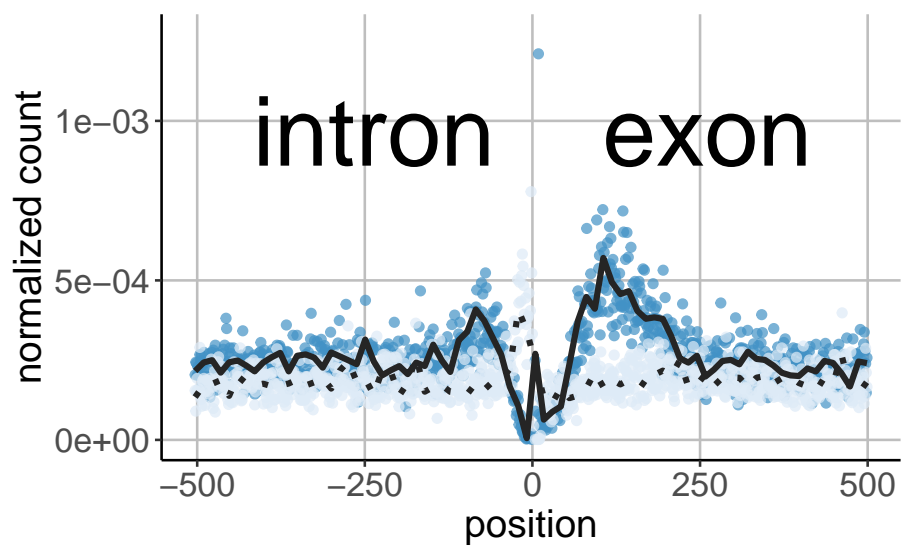

RBM4-CGGGGURUGN

•• antisense — sense    • antisense • sense

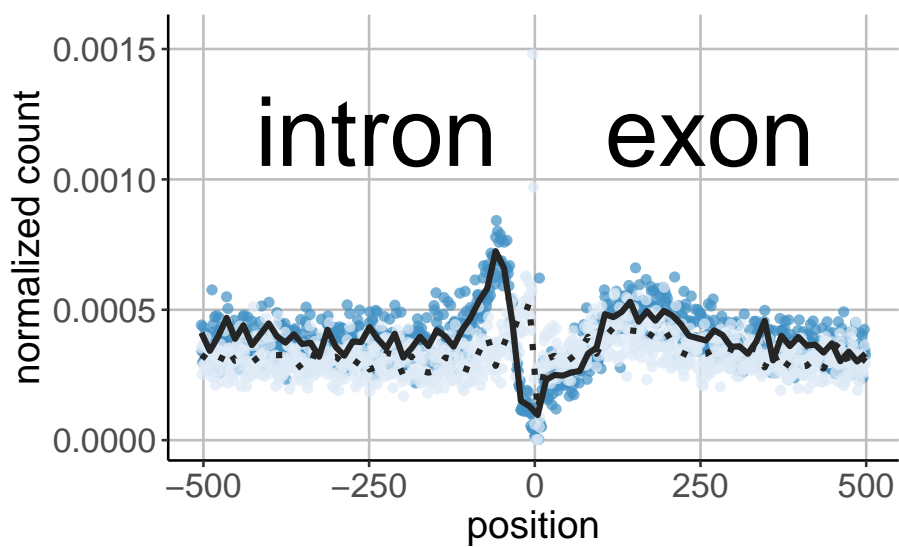

RBPM5-NAGGCACR

•• antisense — sense    • antisense • sense

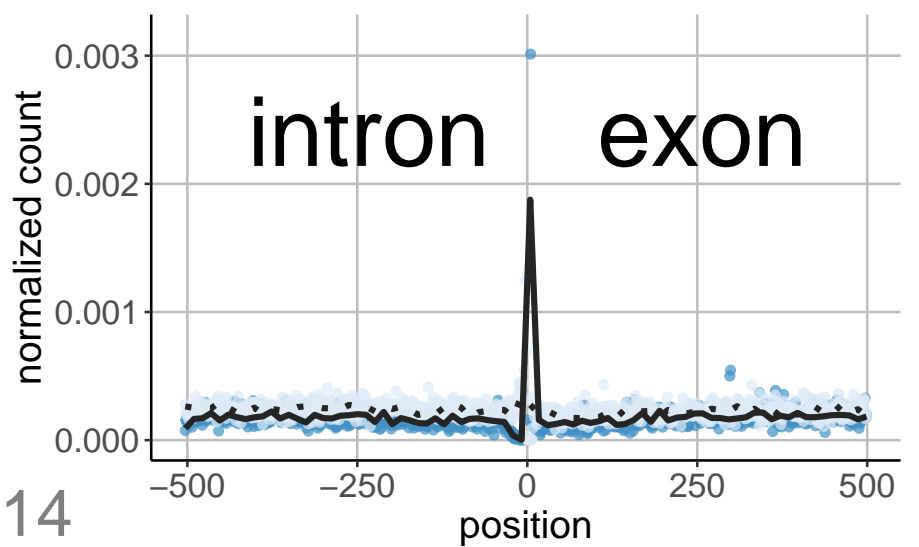

ACCEPTOR

RBPMS-UCACGNGCACN

•• antisense — sense    • antisense • sense

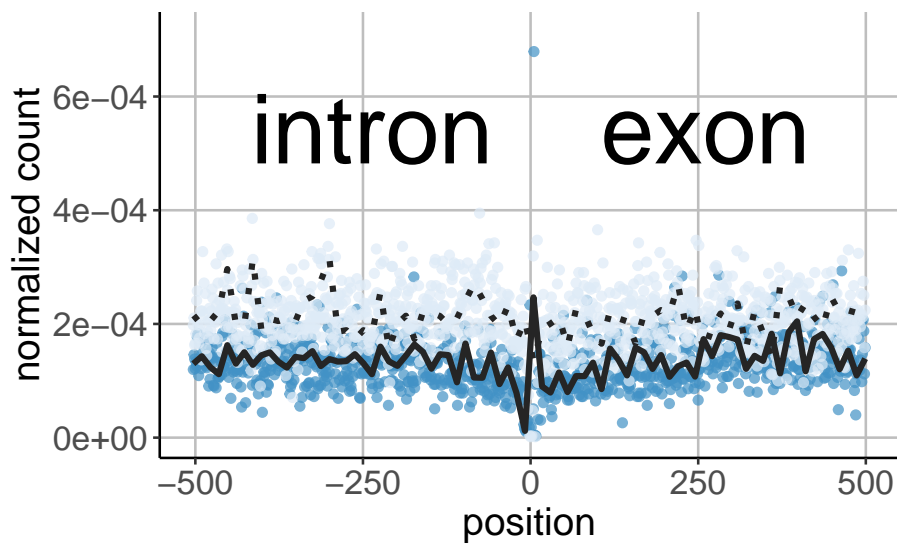

CELF1\_2-UGUGUNUGUGU

•• antisense — sense    • antisense • sense

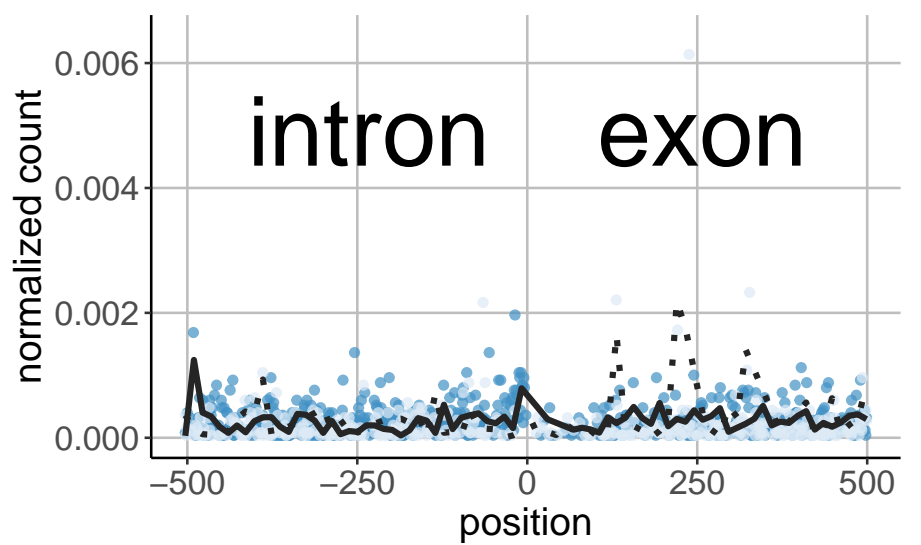

CSTF2-RRGGCGUAGCGUNN

•• antisense — sense    • antisense • sense

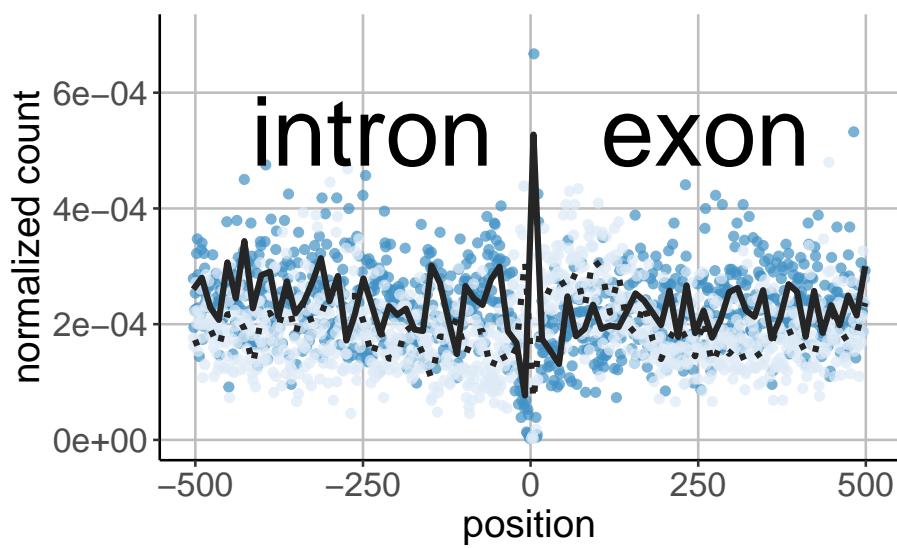

RBM28-GRGGCCGNGCGGUGG

•• antisense — sense    • antisense • sense

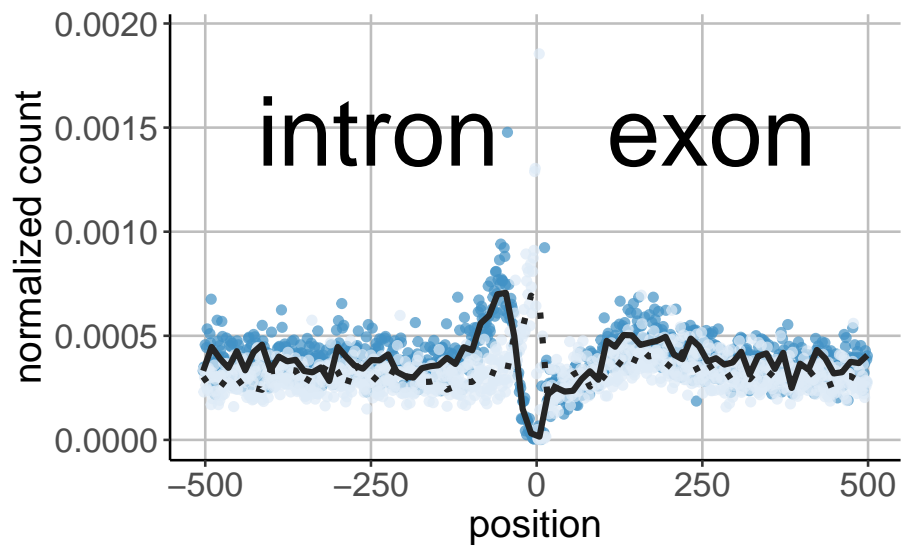

RBM28-GUGGGUCUCGG

•• antisense — sense    • antisense • sense

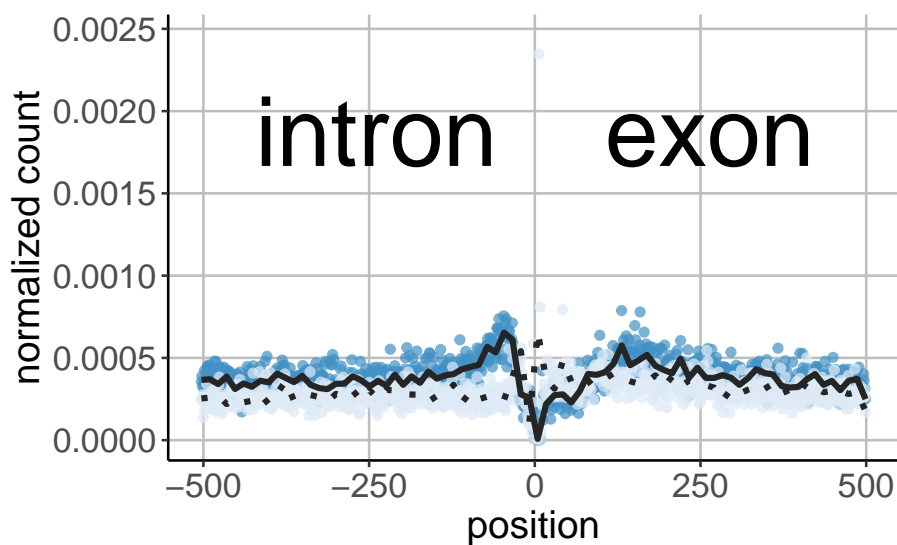

ZC3H10-GCGCAUGCGNN

•• antisense — sense    • antisense • sense

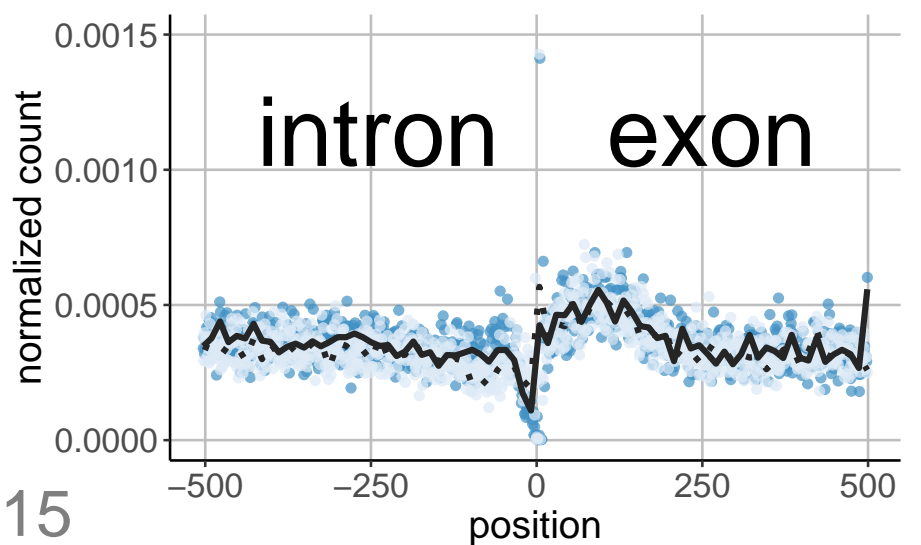



ACCEPTOR

ZC3H10-NGCGCAGCGUN

•• antisense — sense    • antisense • sense

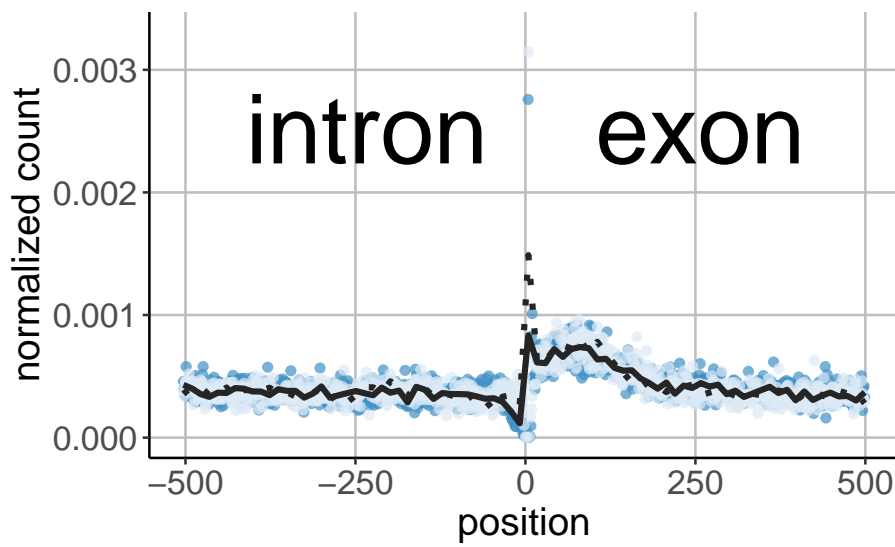

RBFOX1\_2-GCAUGNNGCAUG

•• antisense — sense    • antisense • sense

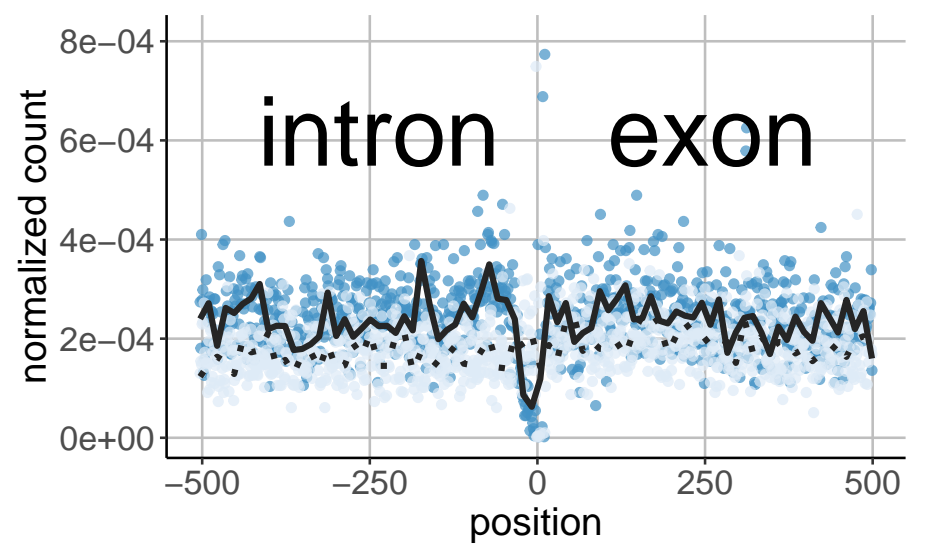

MSI1-KUAGUWKUAGK

•• antisense — sense    • antisense • sense

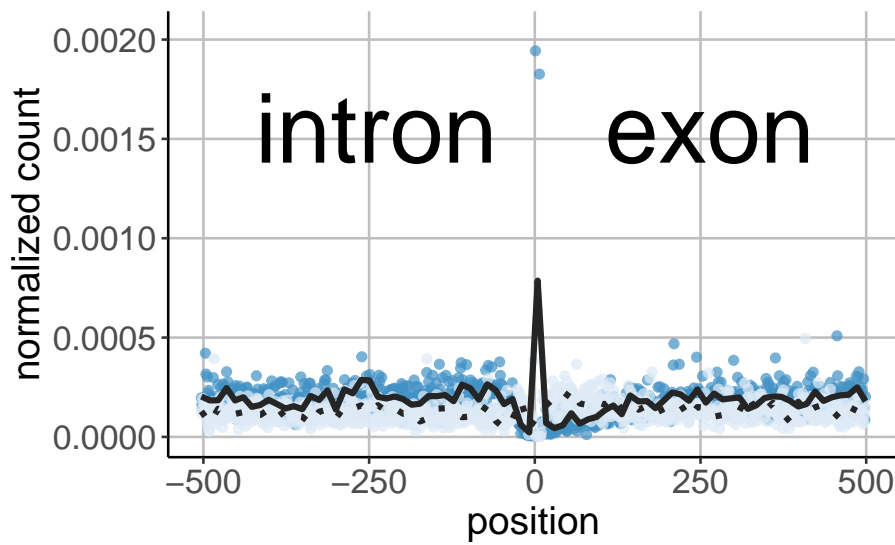

HEXIM1-GKDKCGACGGK

•• antisense — sense    • antisense • sense

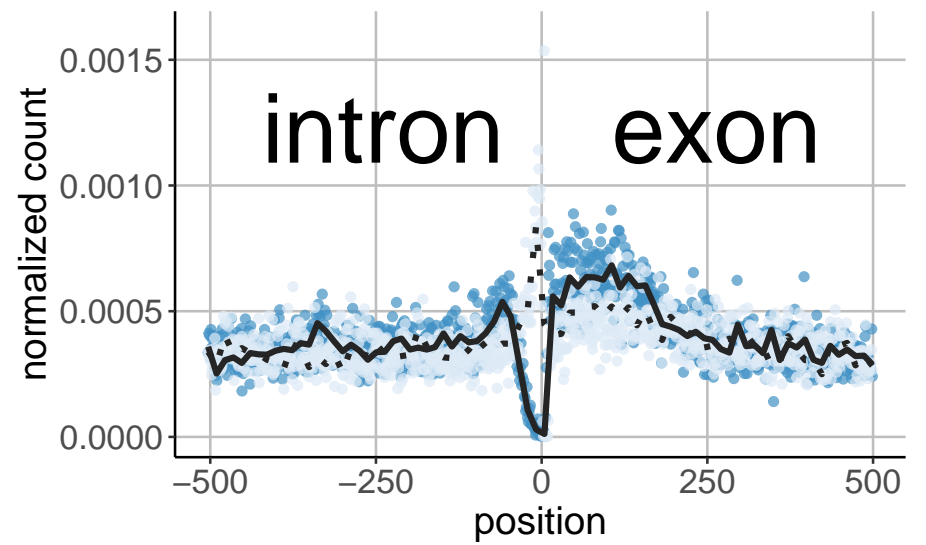

SART3-NGUUAGCRK

•• antisense — sense    • antisense • sense

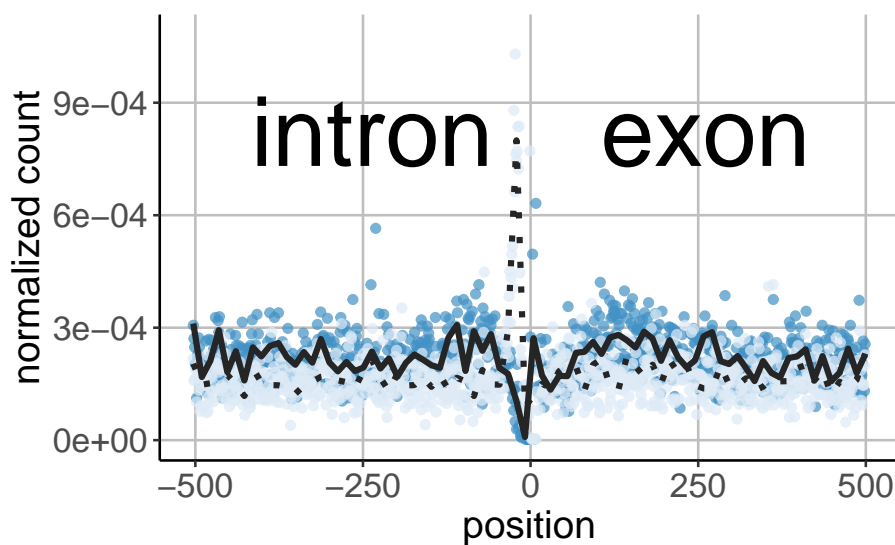

MSI2-GUAGUGDGUAGK

•• antisense — sense    • antisense • sense

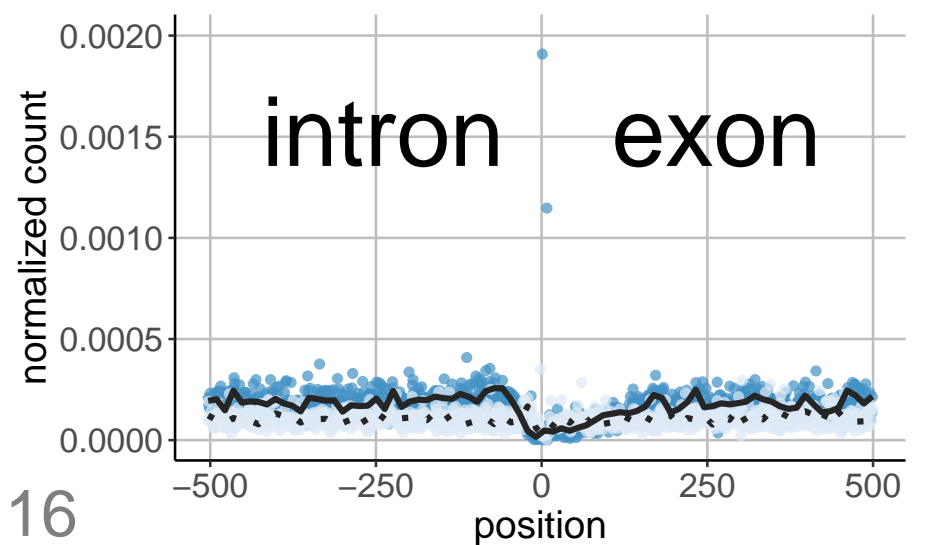

ACCEPTOR

MSI2-GUAGUNNNGUAGK

•• antisense — sense    • antisense • sense

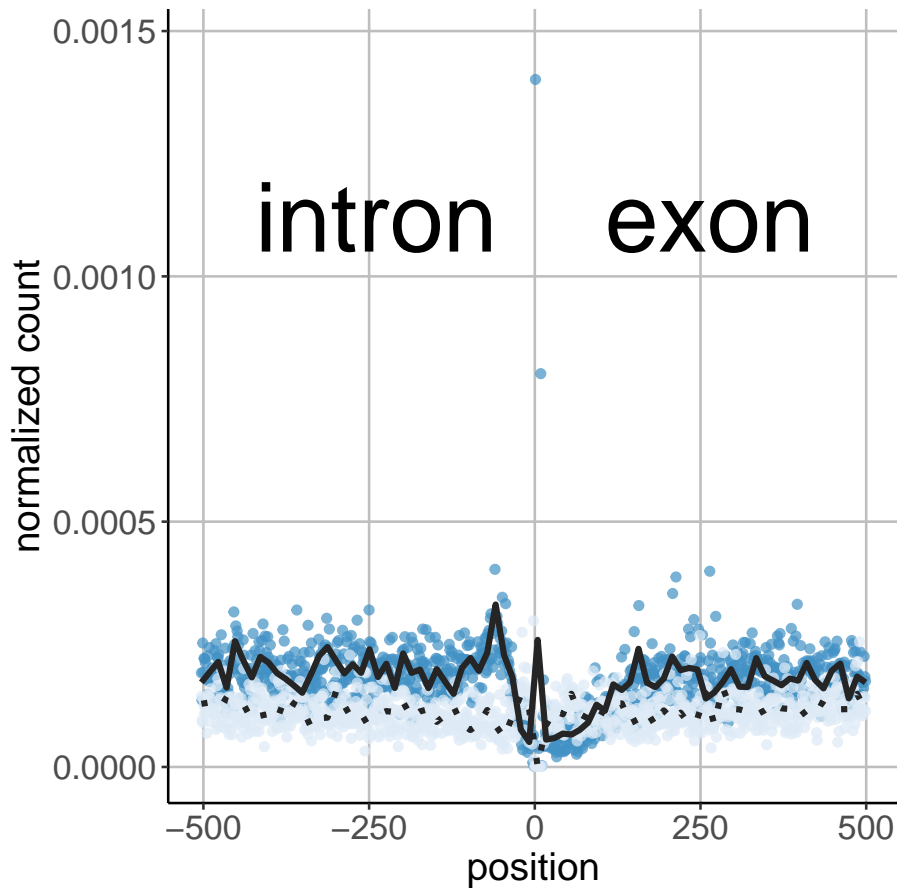

ZCRB1-GNNUUAACK

•• antisense — sense    • antisense • sense

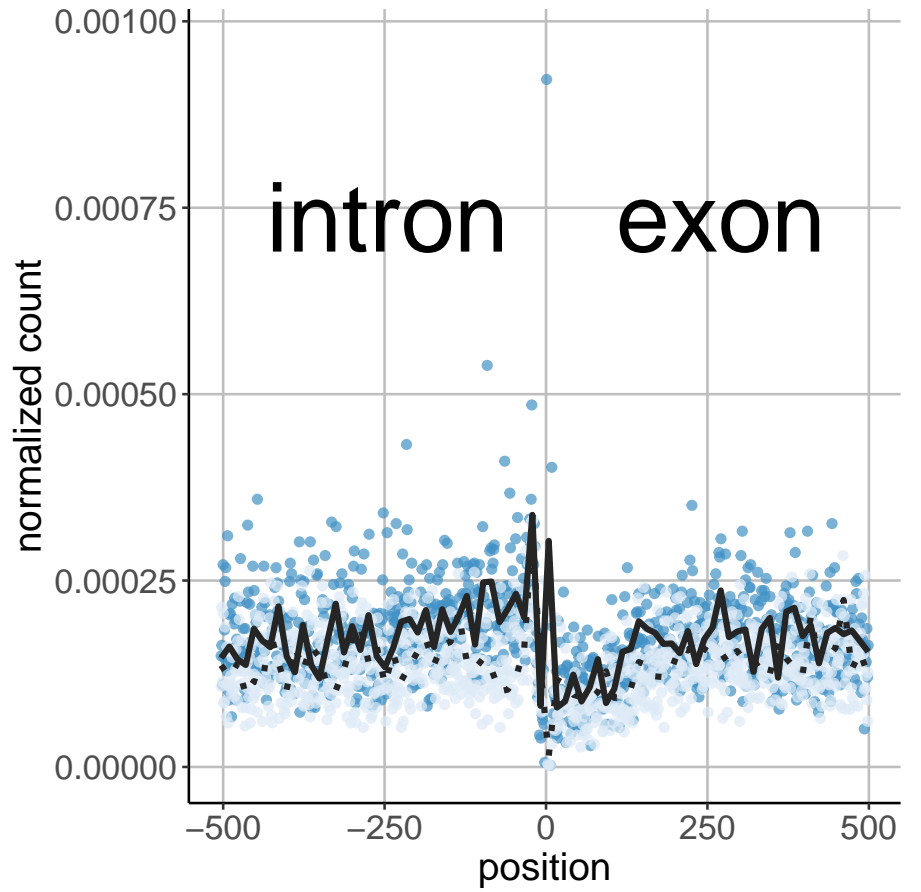

ZCRB1-GUGGACUUA

•• antisense — sense    • antisense • sense

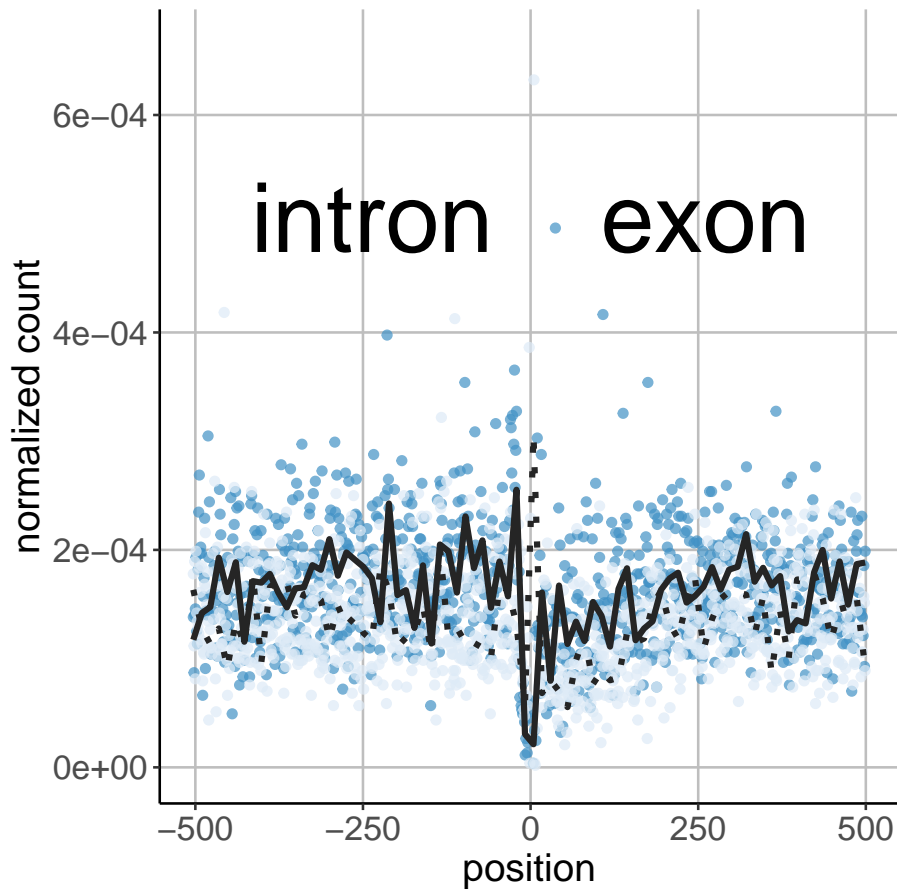

LARP6-GUGUCNNNNNNNNNGAAGUCN

•• antisense — sense    • antisense • sense

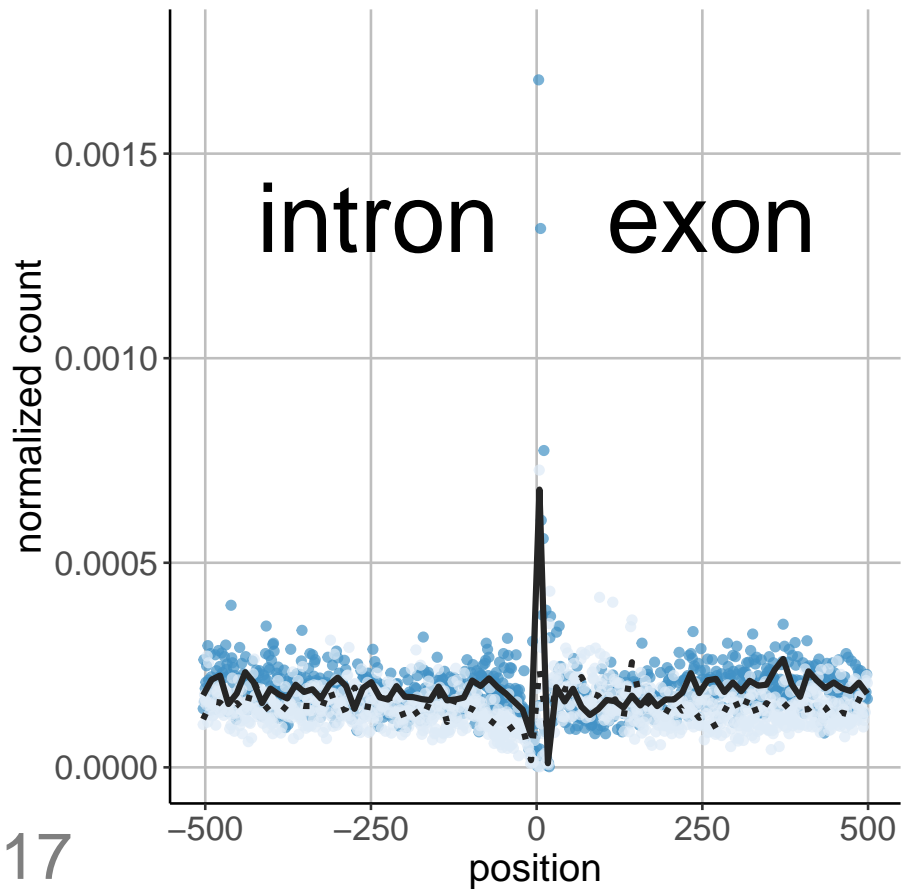

ACCEPTOR

DAZ1\_2-NNUGUGUGSGUUUCCGSN

•• antisense — sense    • antisense • sense

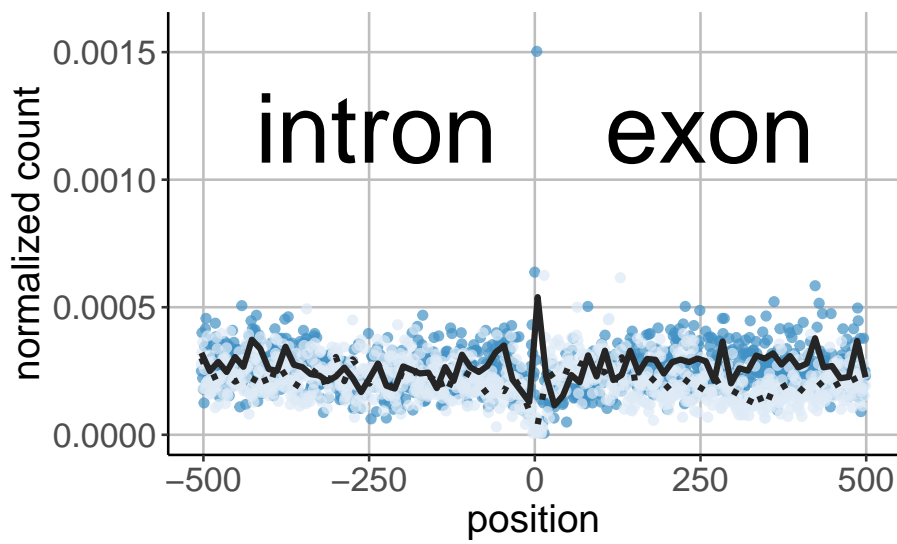

DAZ1\_2-NUGKUGUUGUAGN

•• antisense — sense    • antisense • sense

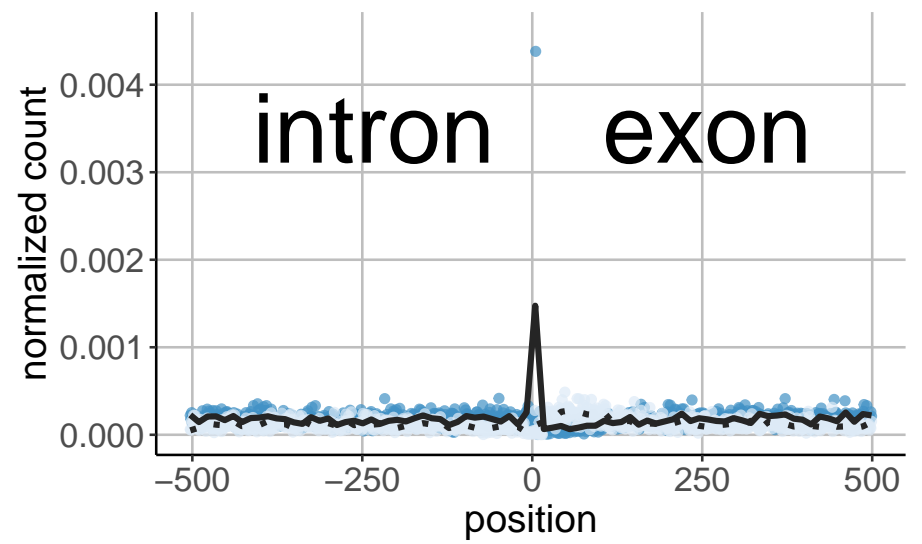

DAZ1\_2-CRNAAUGUUAGUAGN

•• antisense — sense    • antisense • sense

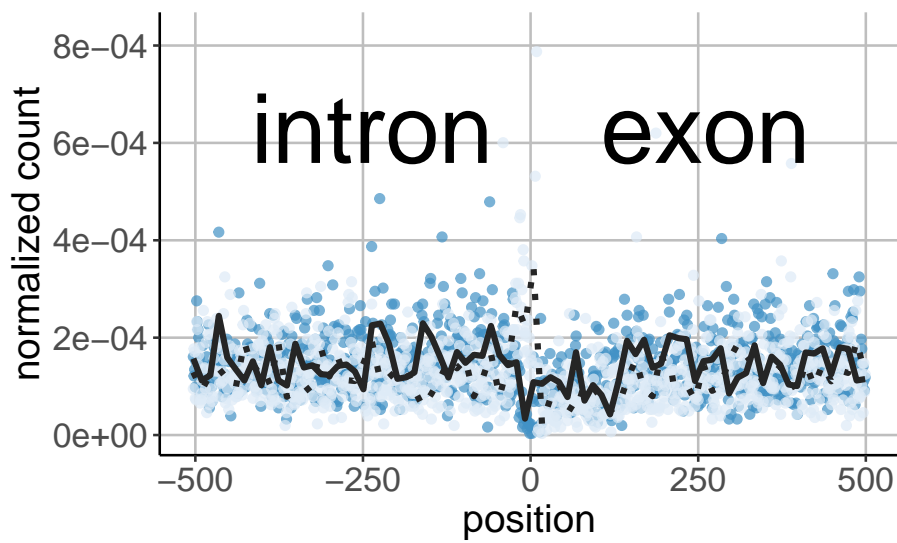

DAZ3-NNUGUGUGSGUUUCCGSN

•• antisense — sense    • antisense • sense

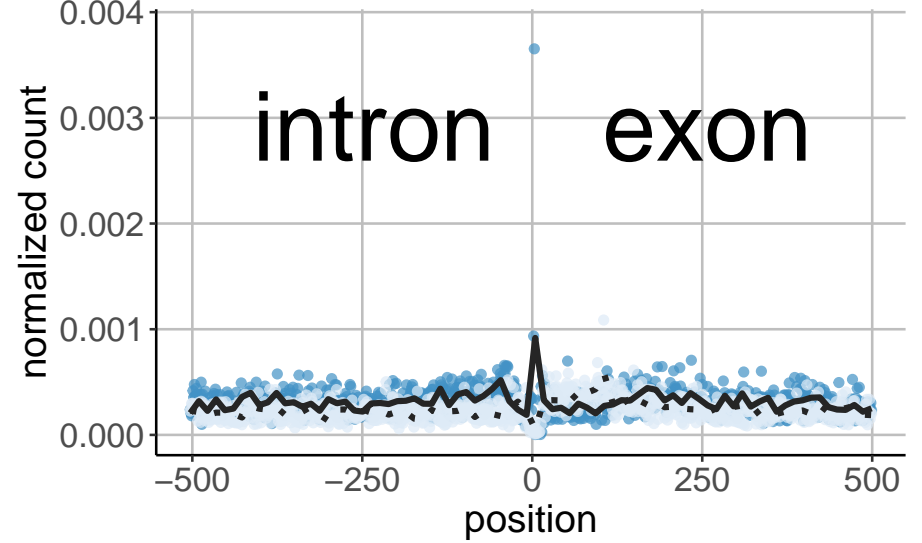

DAZ4-NNUGUGUGSGUUUCCGSN

•• antisense — sense    • antisense • sense

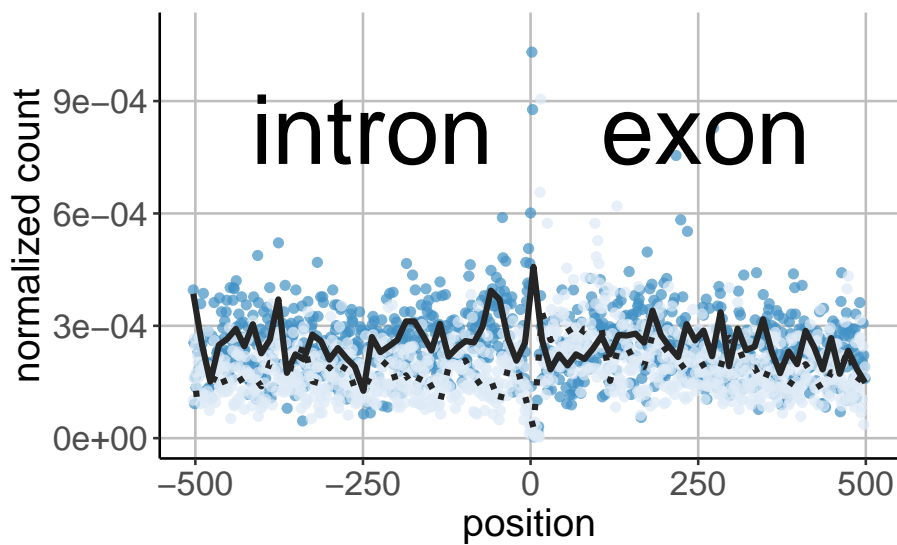

DAZ4-CUGKUGUUGUAGG

•• antisense — sense    • antisense • sense

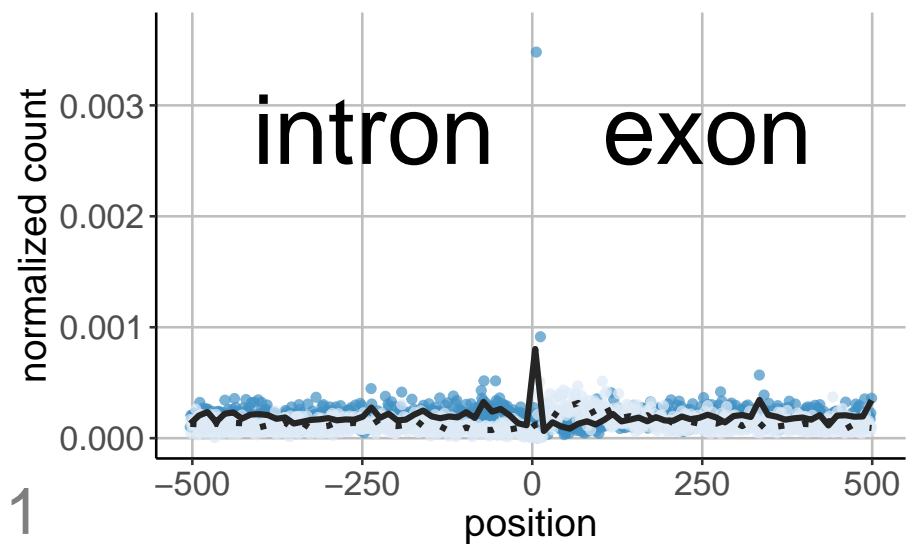

1

ACCEPTOR

DAZL-NNUGYGUGCGUUUCCGSN

• antisense — sense    • antisense • sense

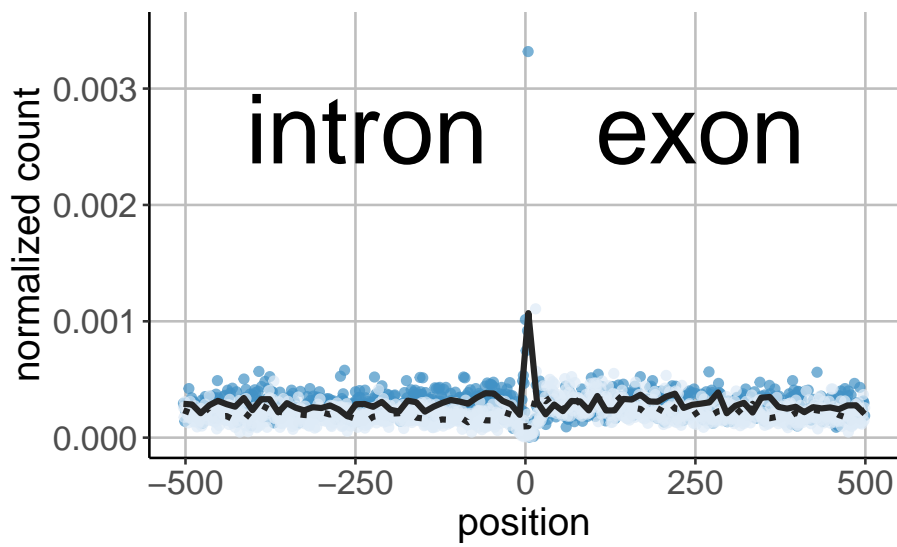

HNRNPA1-NGCAGUUUUAGGGCN

• antisense — sense    • antisense • sense

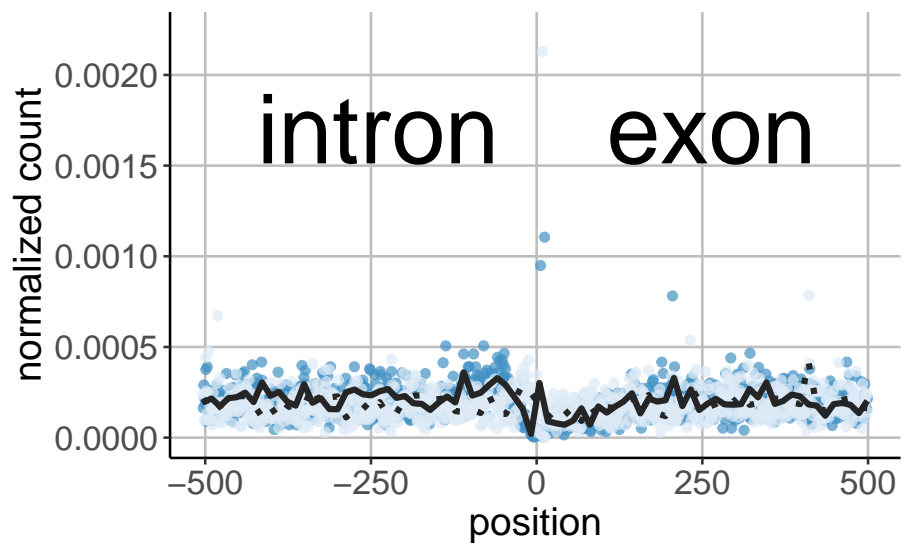

HNRNPC-NGGGUCUNAUUUUUUAAN

• antisense — sense    • antisense • sense

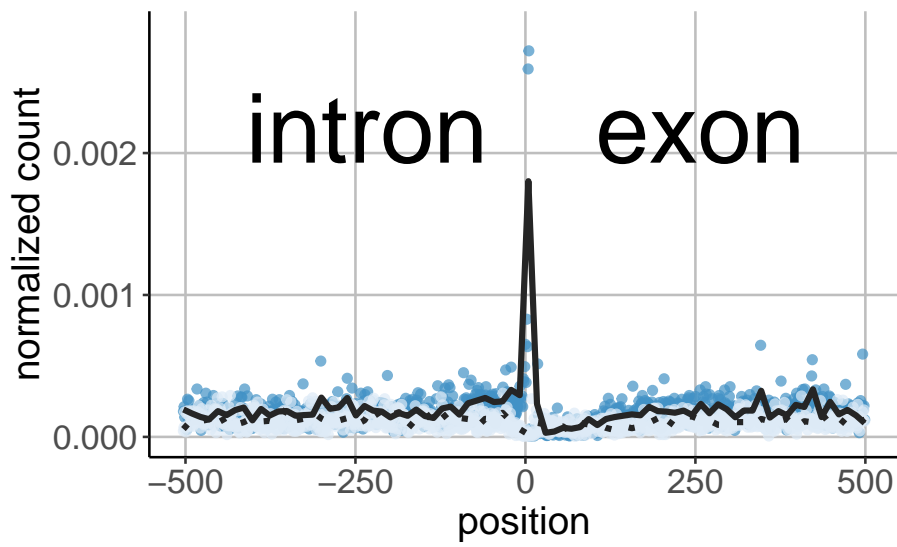

HNRNPCL1-NGGGUCUNAUUUUUUAAN

• antisense — sense    • antisense • sense

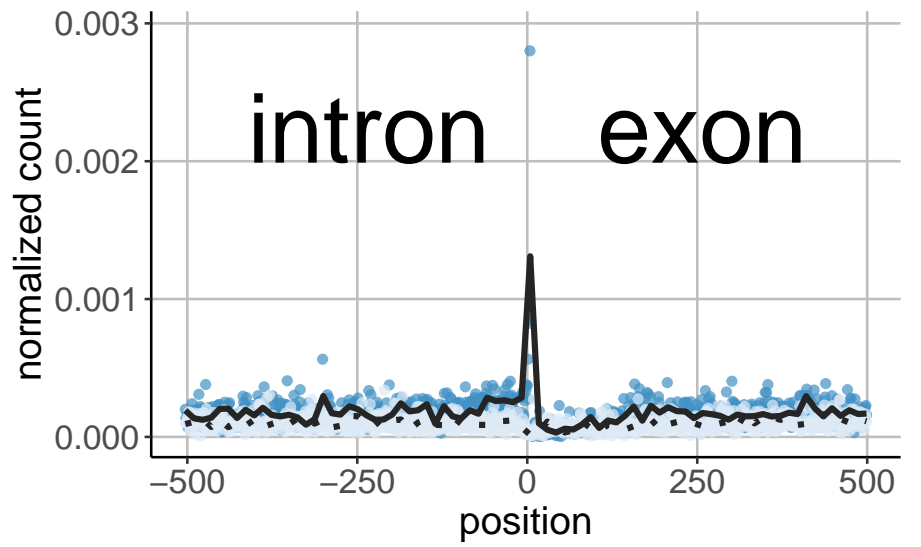

MKRN1-NYGUAAAKUGUAGN

• antisense — sense    • antisense • sense

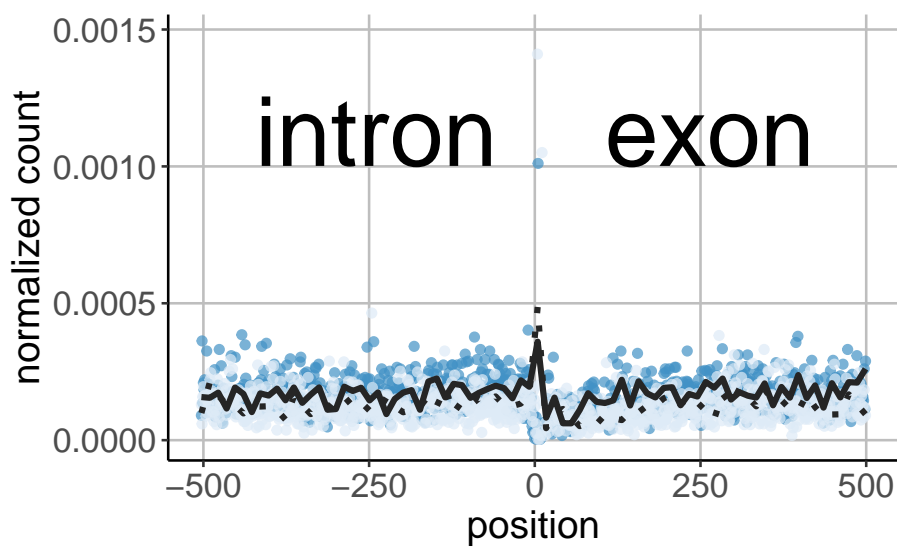

RALY-GGGUCUWUUUUUAA

• antisense — sense    • antisense • sense

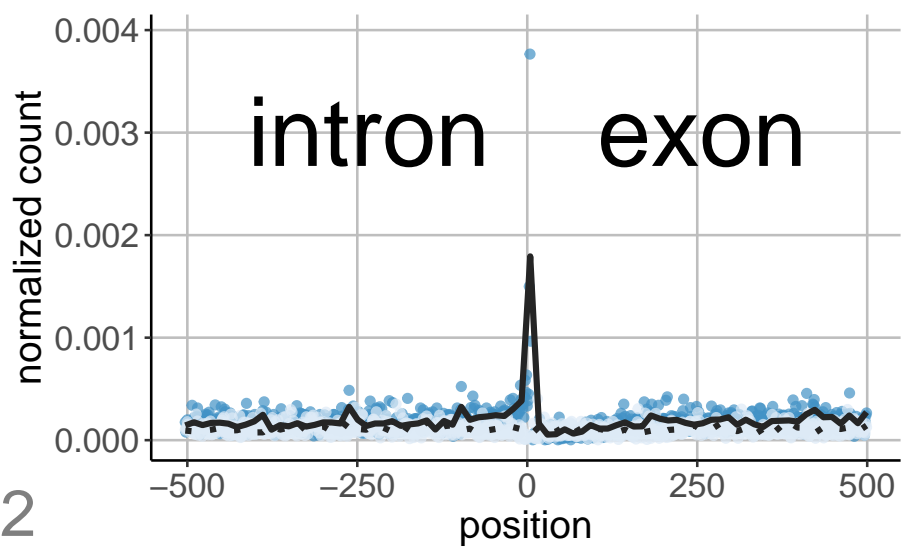

2

ACCEPTOR

RBFOX1\_4-GKUGCAUGUG

•• antisense — sense    • antisense • sense

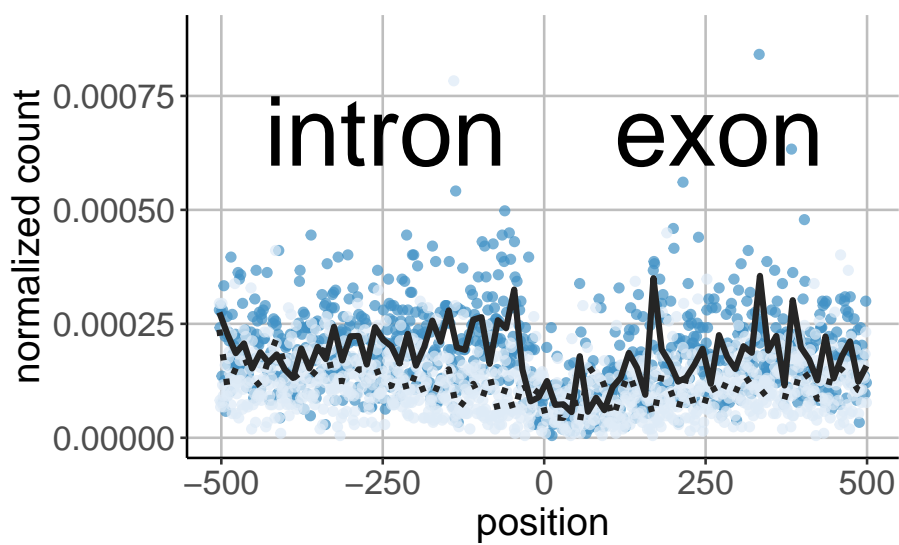

RBFOX3-GUWGCAUGUG

•• antisense — sense    • antisense • sense

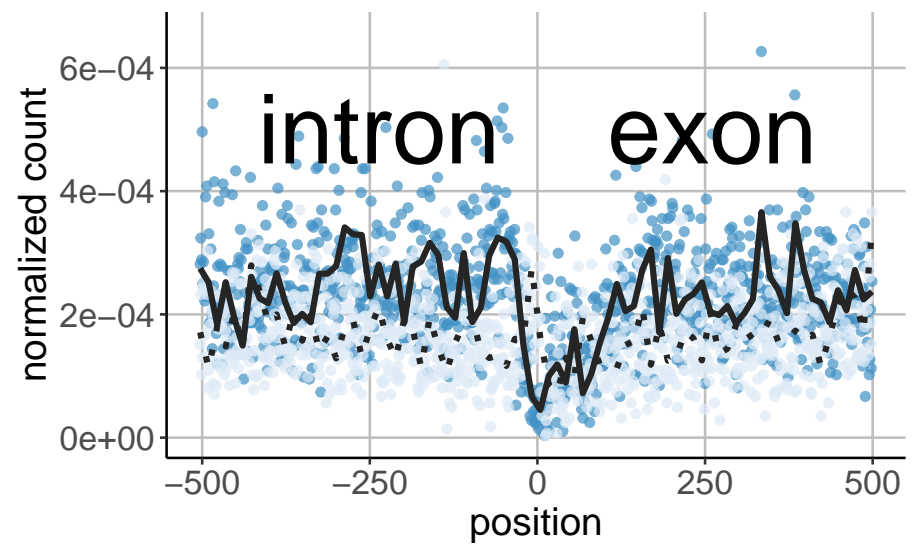

RBM4-KGUUGCGCGGG

•• antisense — sense    • antisense • sense

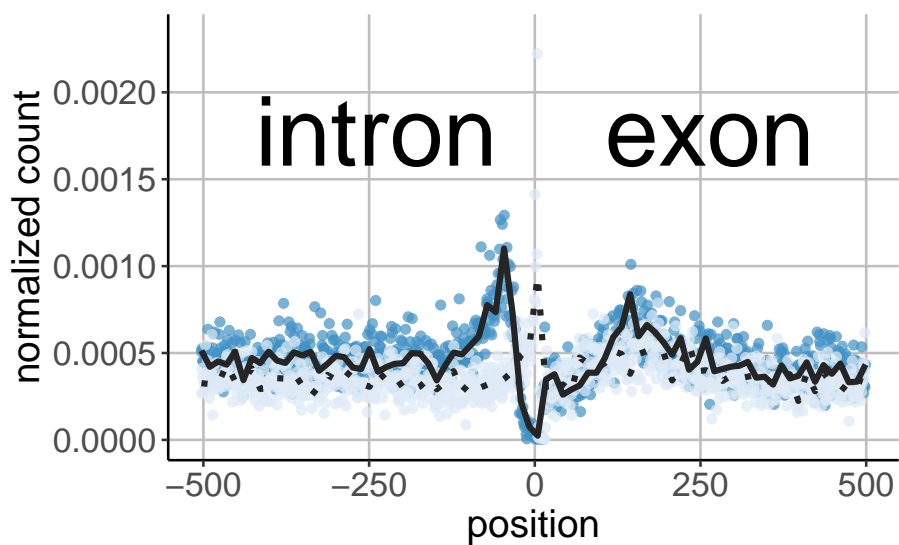

RBM4-UGAGUGCGGUAG

•• antisense — sense    • antisense • sense

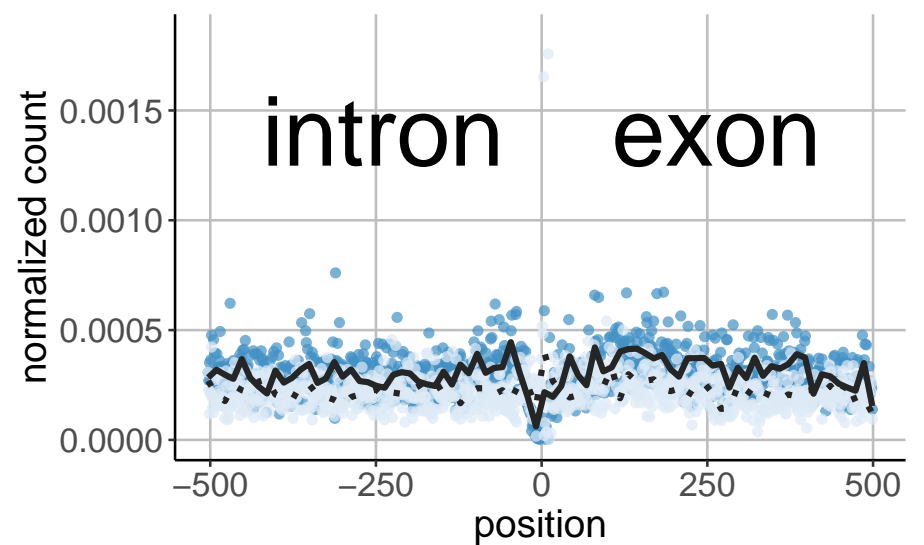

RBM4B-KGUUGCGCGGG

•• antisense — sense    • antisense • sense

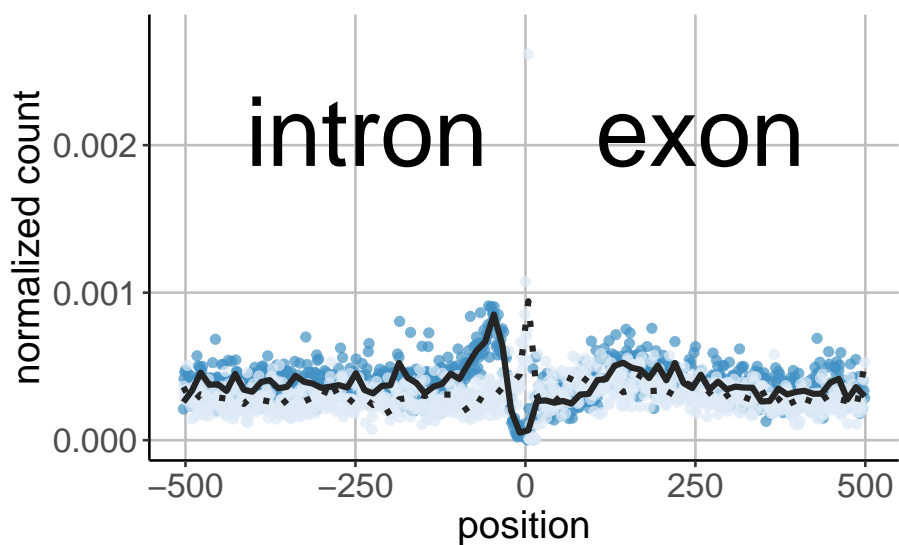

RBM4B-UGAGUGCGGUAG

•• antisense — sense    • antisense • sense

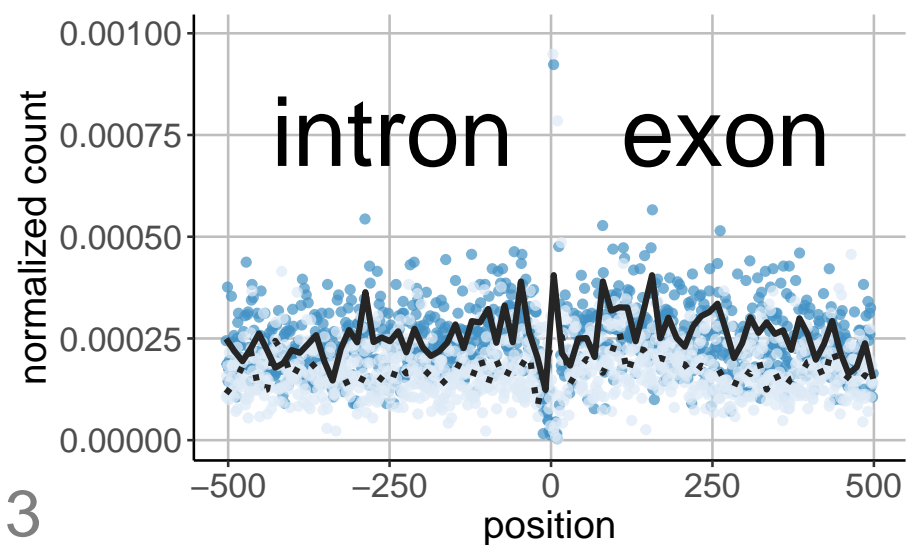

3

ACCEPTOR

RBM6-YRCGCUCCUNGCY

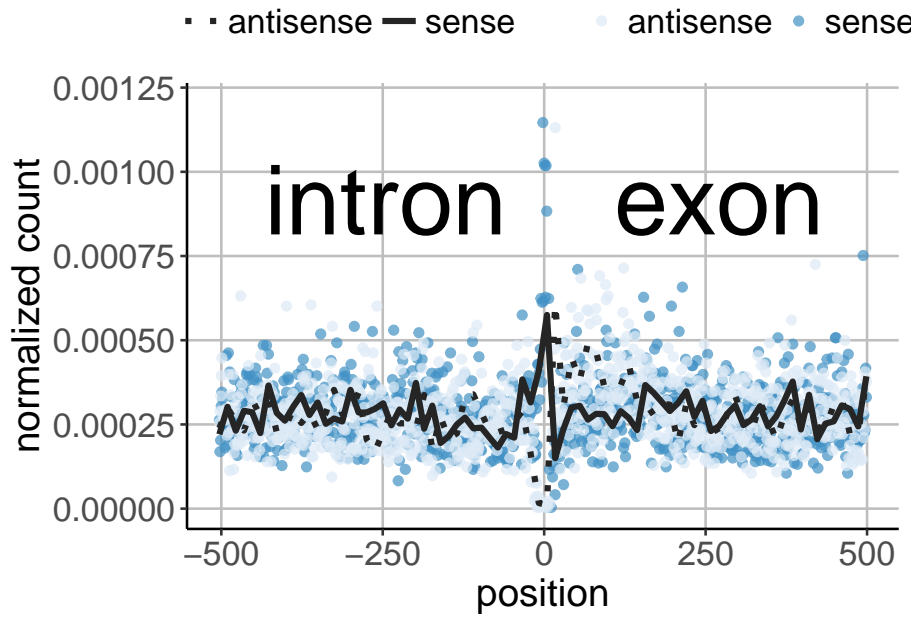

RBM6-YRYGCUCGUGCYN

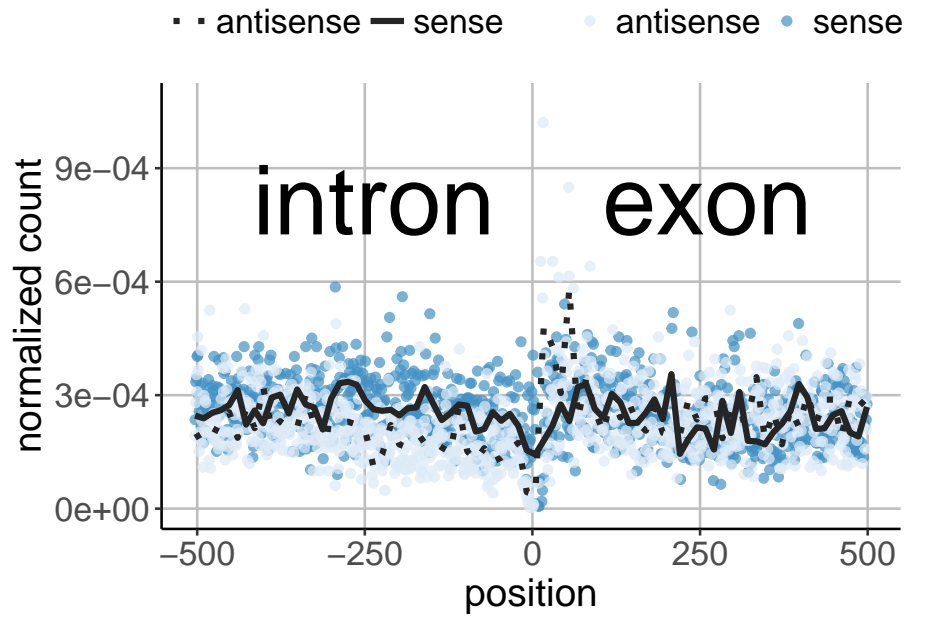

RBMS1-SGUGCAUAAKGCN

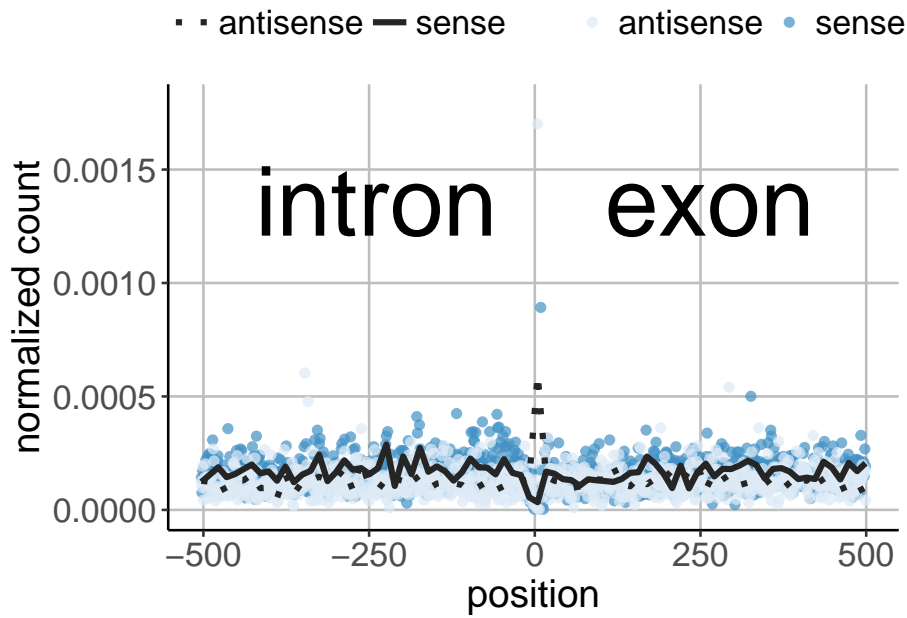

RBMS2-NUGCAUAAUGN

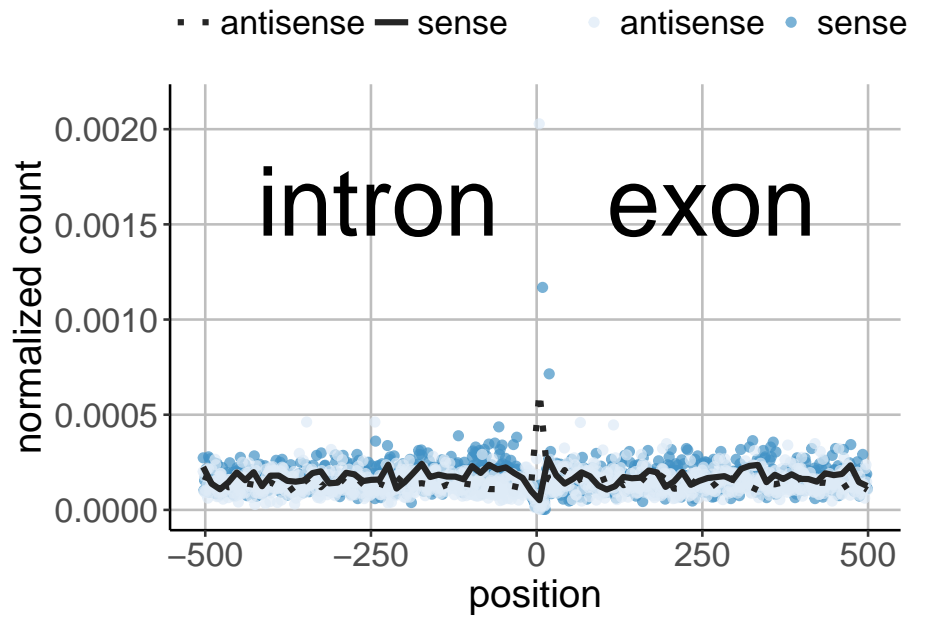

RBMS3-NUGCAUAAUGN

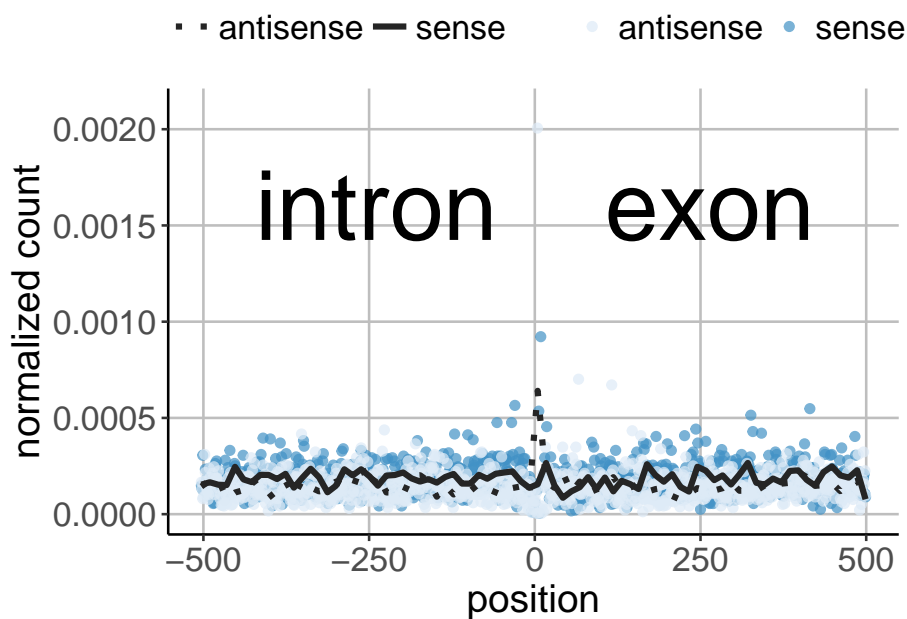

RBMS3-SAUGYAURAKKUG

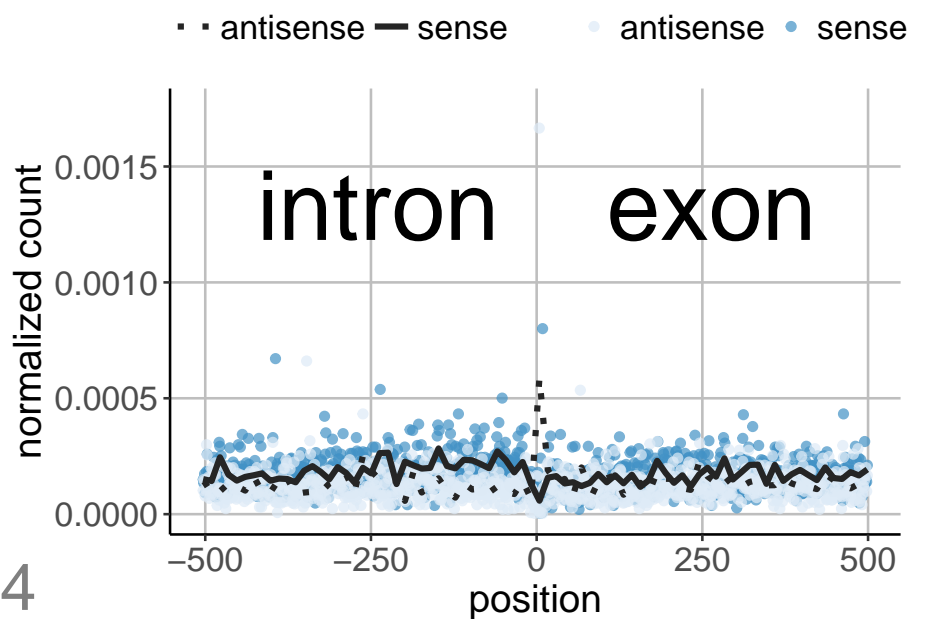

4

ACCEPTOR

RBMY1E-NGCUUCGNGCN

•• antisense — sense    • antisense • sense

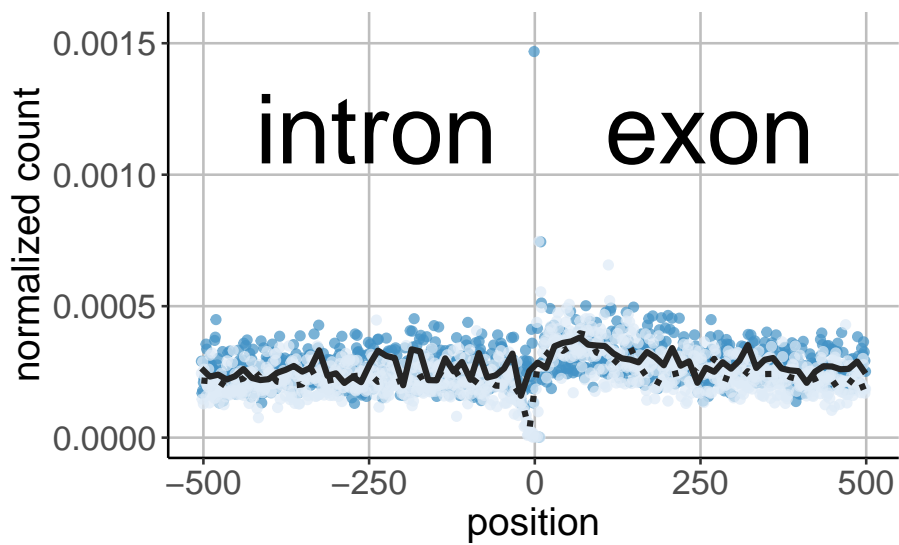

RBMY1E-NAGCUUNGUGCUN

•• antisense — sense    • antisense • sense

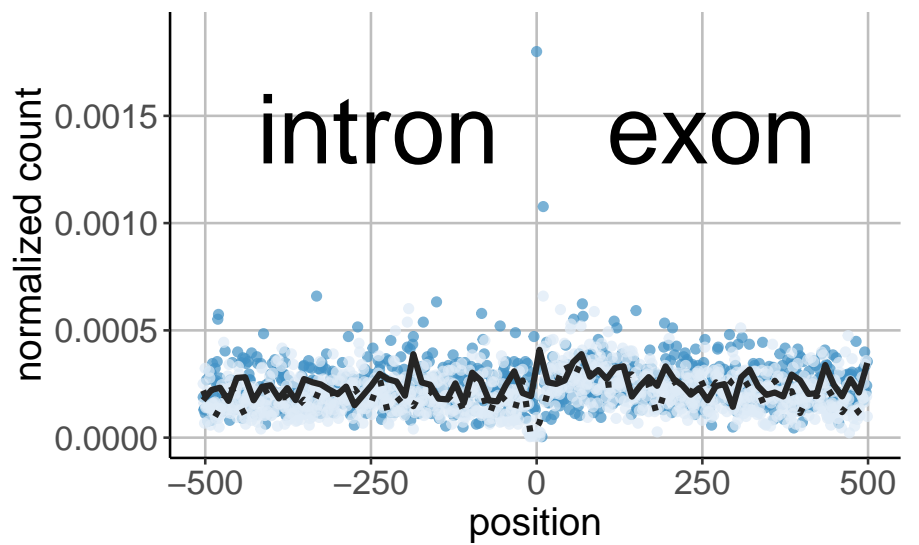

RBMY1F-NGCCUCAAGGYN

•• antisense — sense    • antisense • sense

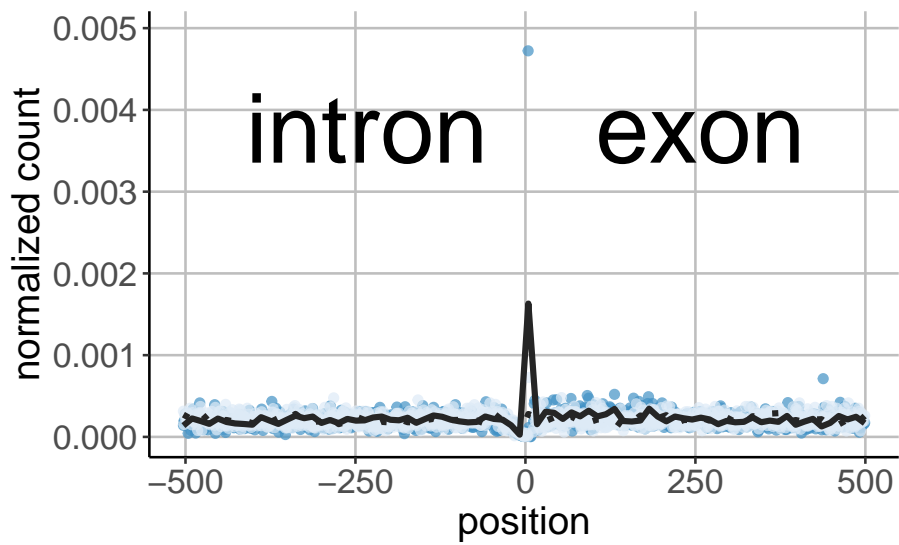

RBMY1F-GCGCAAGAGC

•• antisense — sense    • antisense • sense

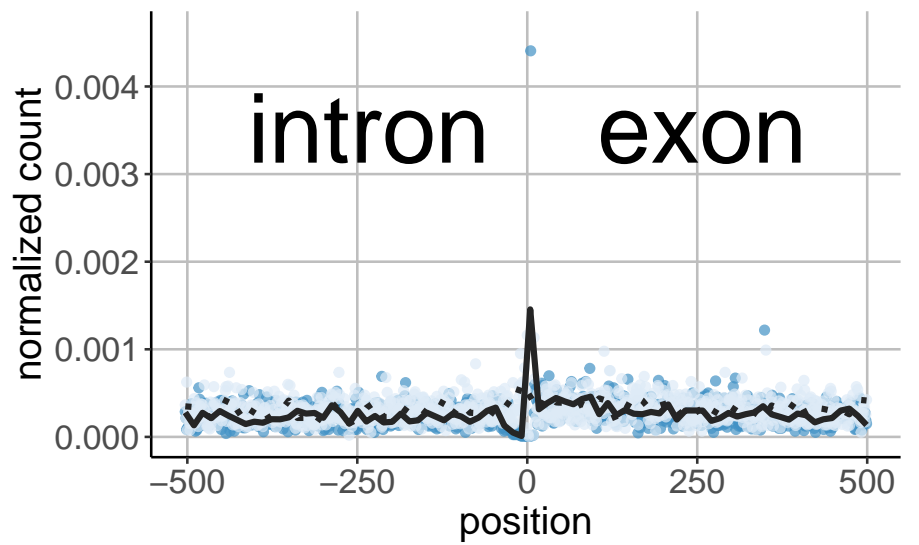

RBMY1J-NGCCUCAAGGYN

•• antisense — sense    • antisense • sense

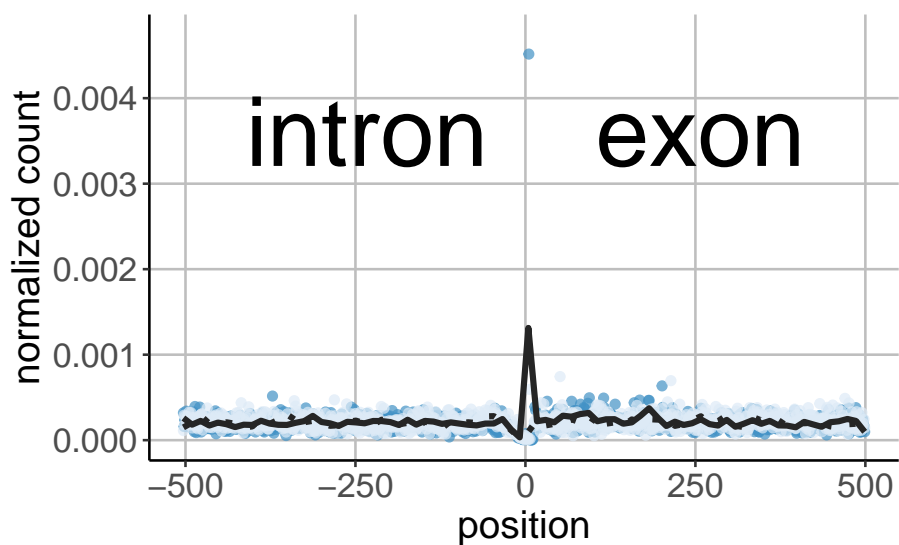

RBMY1J-GCGCAAGAGC

•• antisense — sense    • antisense • sense

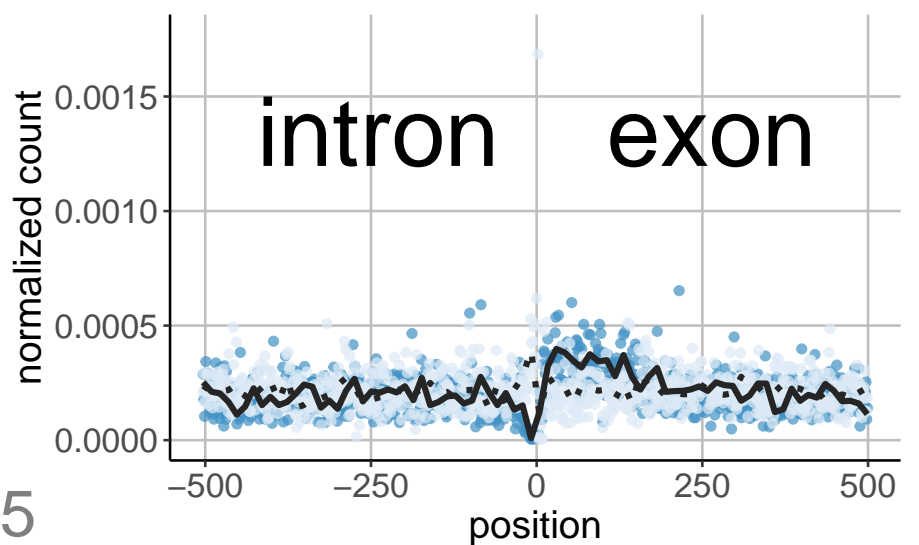

5

ACCEPTOR

RBM1J-NGCGUCGUGGCN

• antisense — sense    • antisense • sense

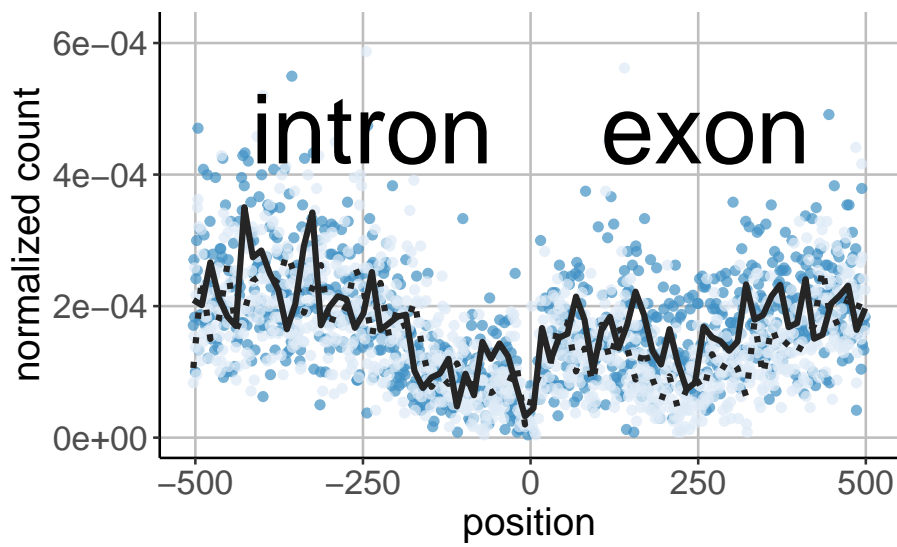

RBM1J-UGAAUUCGUCN

• antisense — sense    • antisense • sense

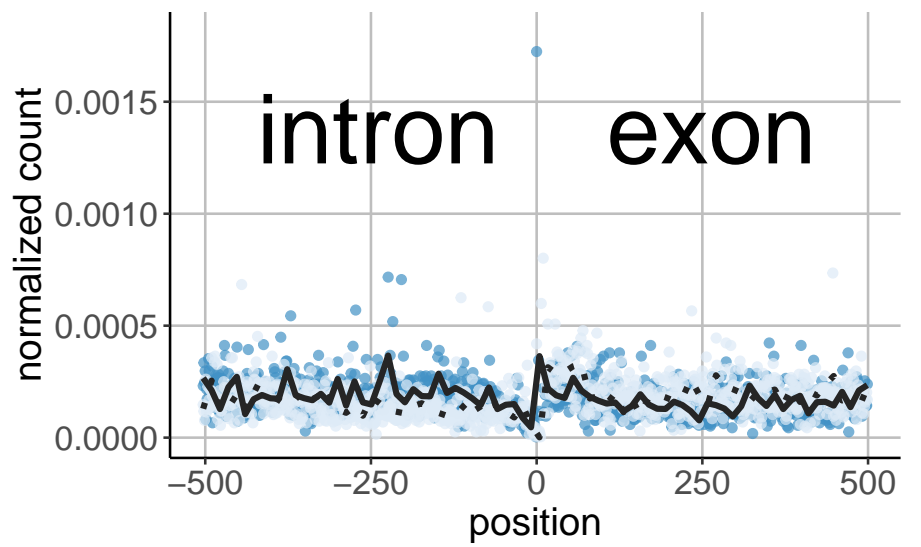

RC3H1\_2-YRCGUUUUAGKR

• antisense — sense    • antisense • sense

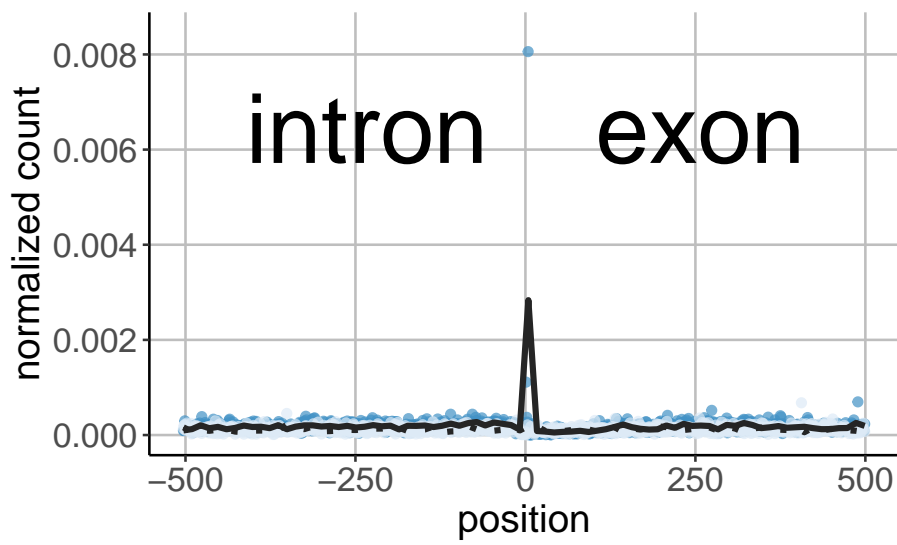

RC3H2-CURCGUUUUAGKAG

• antisense — sense    • antisense • sense

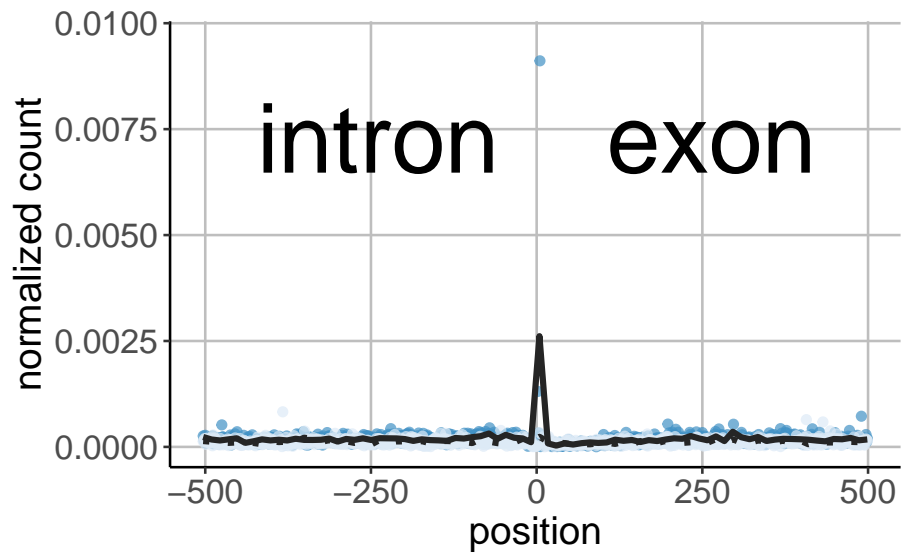

RC3H2-CUCGUAUCGAG

• antisense — sense    • antisense • sense

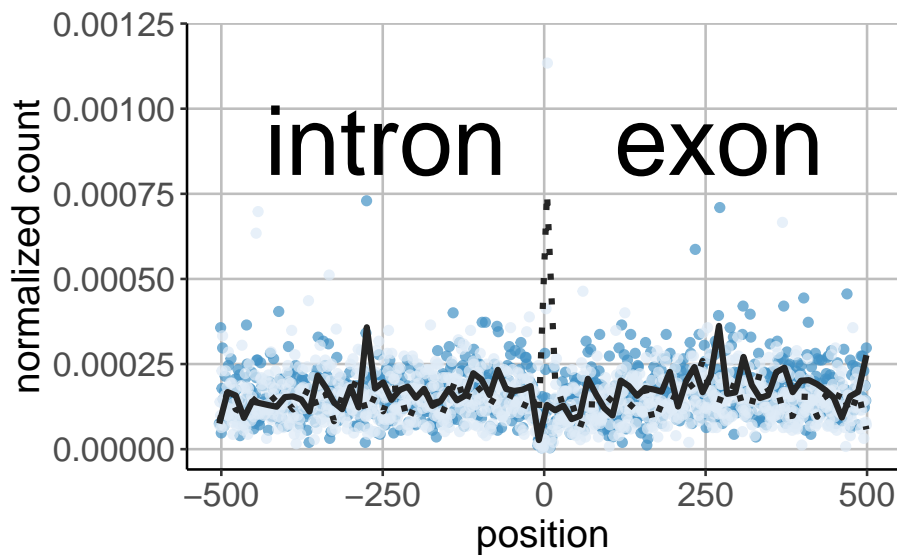

RC3H2-CCUCUNUGAGG

• antisense — sense    • antisense • sense

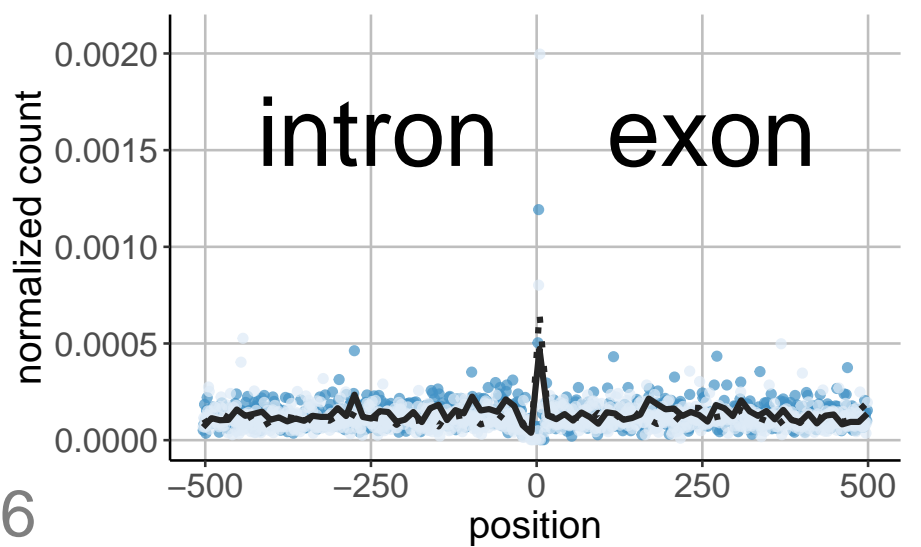

6



ACCEPTOR

RNPC3-GCAGUKUUAGGGY

•• antisense — sense    • antisense • sense

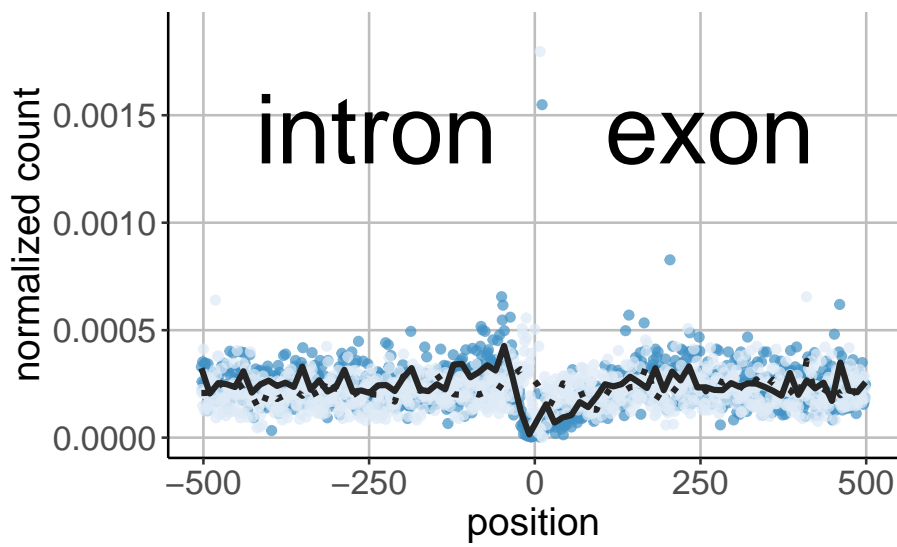

YBX1-RCCAYRHCAUCGY

•• antisense — sense    • antisense • sense

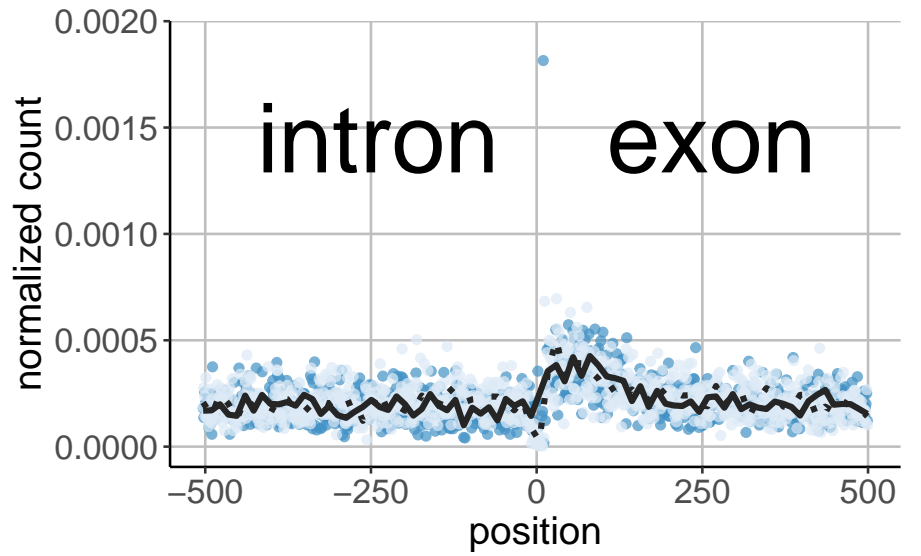

ZC3H12A-NGCAGGUAAGUGCN

•• antisense — sense    • antisense • sense

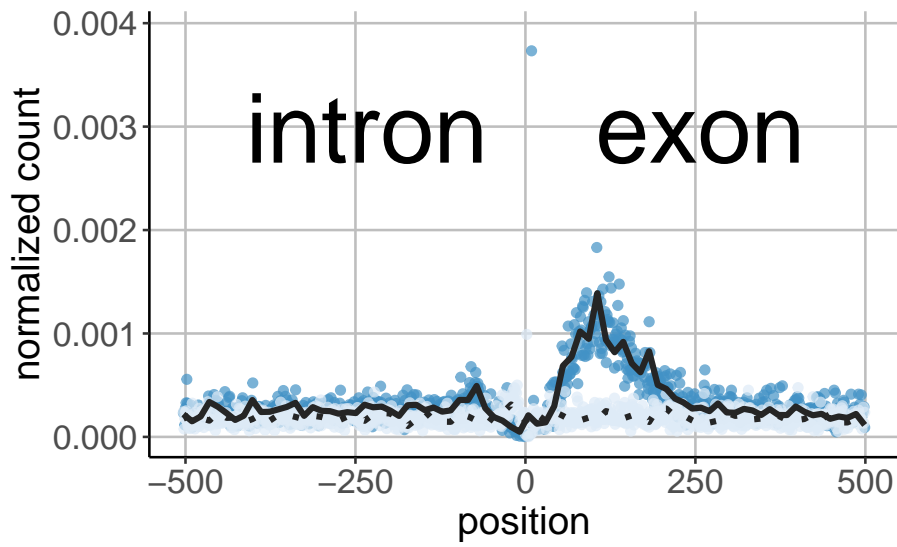

ZC3H12B-NGCAGGUAAGUGSN

•• antisense — sense    • antisense • sense

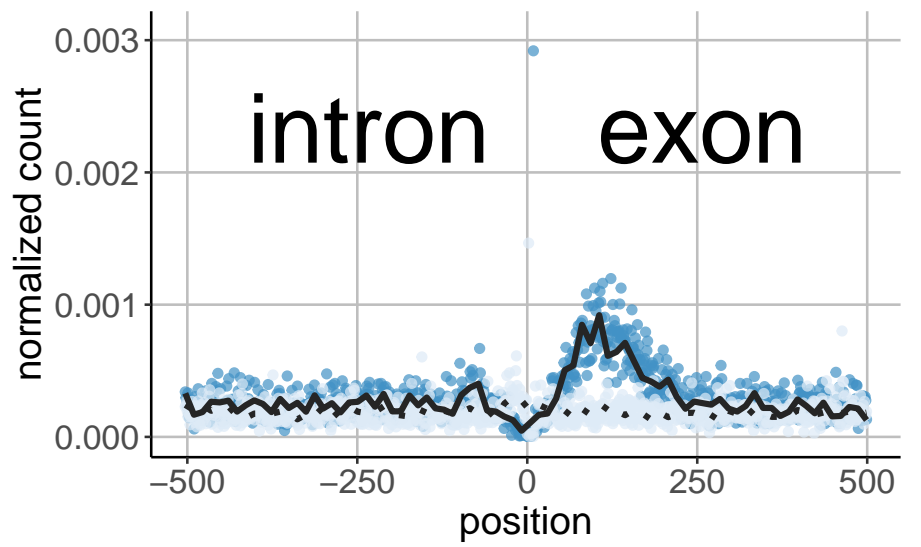

ZC3H12B-SCAGGUAUUAUGS

•• antisense — sense    • antisense • sense

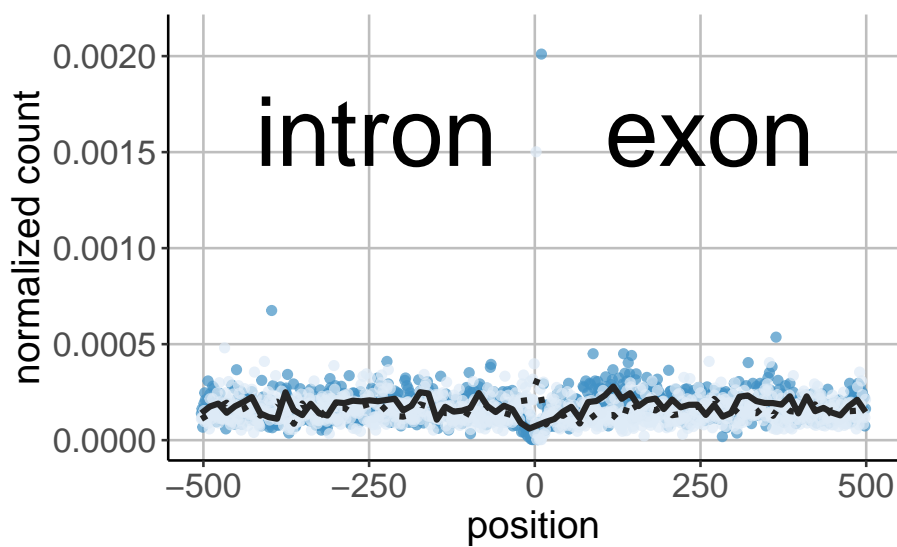

7

DONOR

ZC3H8-GCUUGC

•• antisense — sense    • antisense • sense

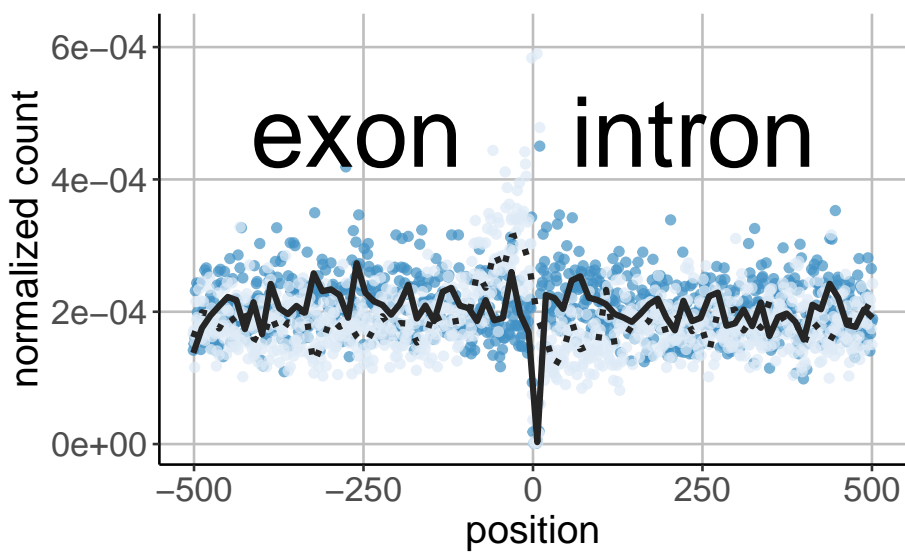

ESRP1\_3-GGUGUUGGUG

•• antisense — sense    • antisense • sense

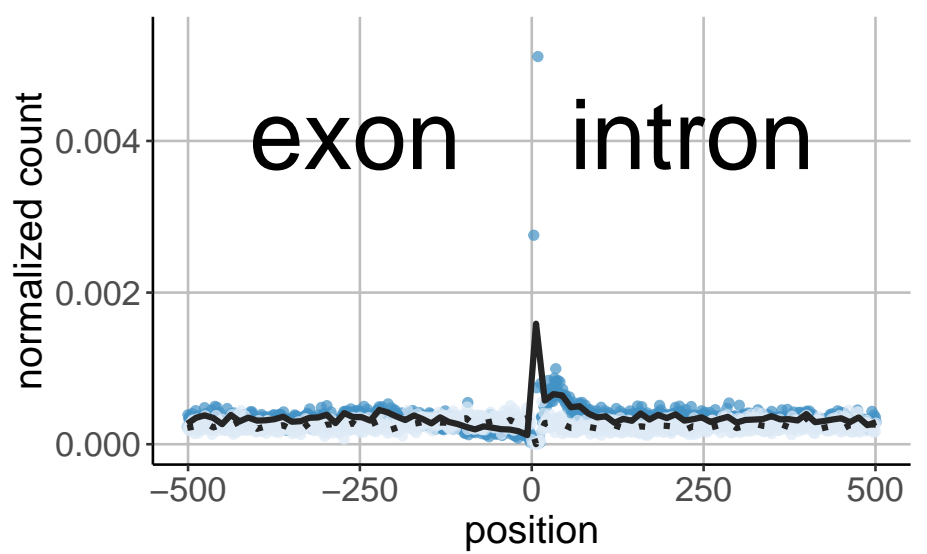

ELAVL3-GUUUUUG

•• antisense — sense    • antisense • sense

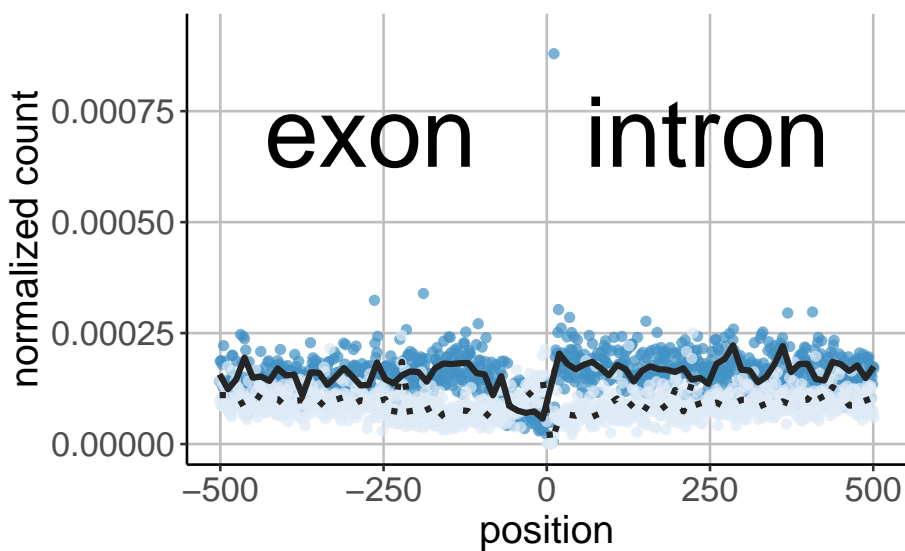

PUM1-NUGUAAAUAG

•• antisense — sense    • antisense • sense

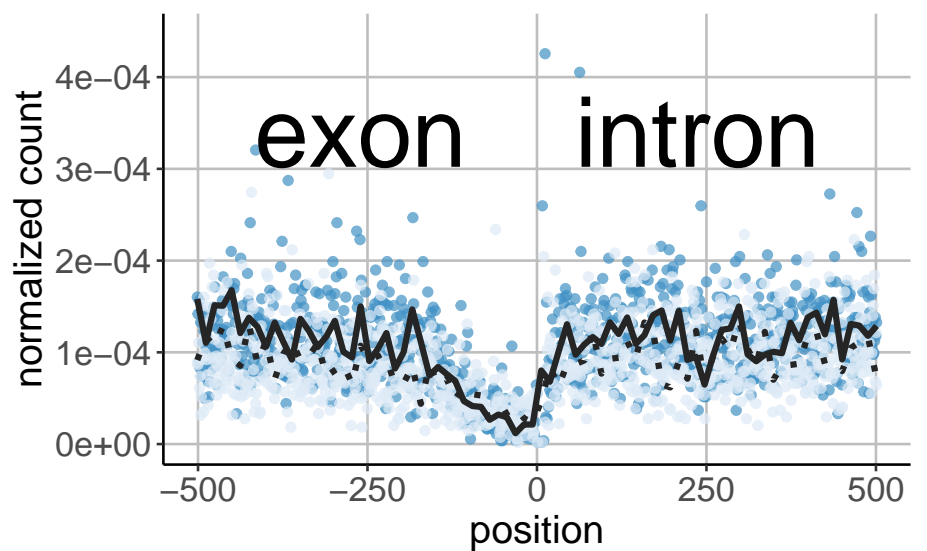

QKI-NUACUAACAWN

•• antisense — sense    • antisense • sense

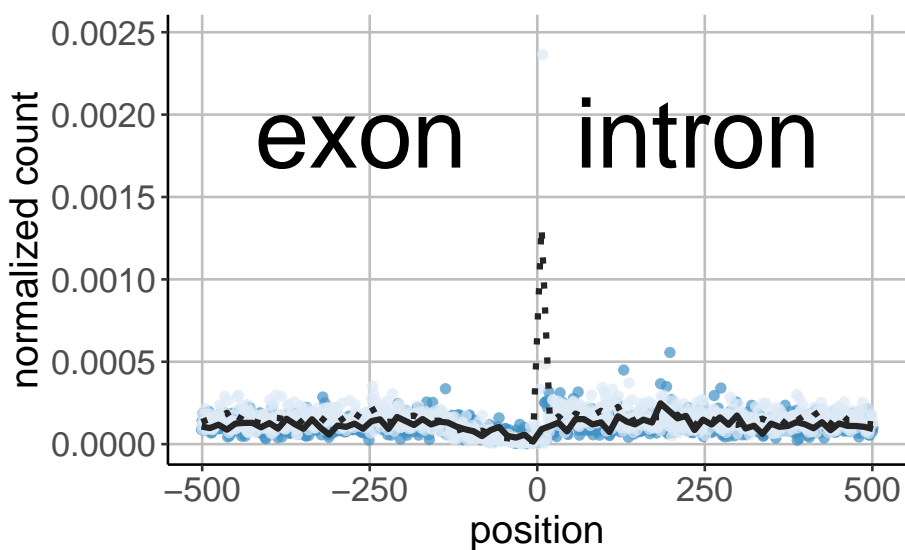

MCM3AP-CGCCAGUGCG

•• antisense — sense    • antisense • sense

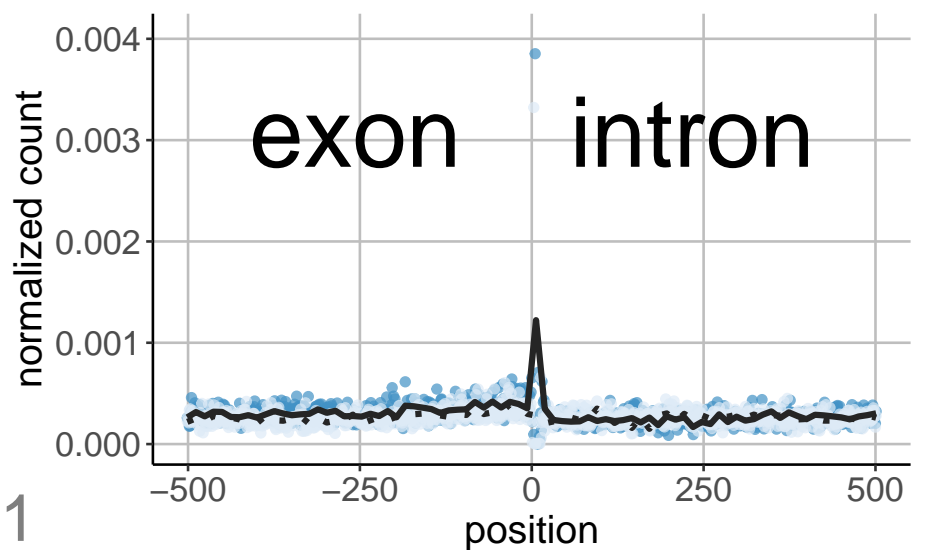

DONOR

HNRNPC-UUUUUGGUGG

•• antisense — sense    • antisense • sense

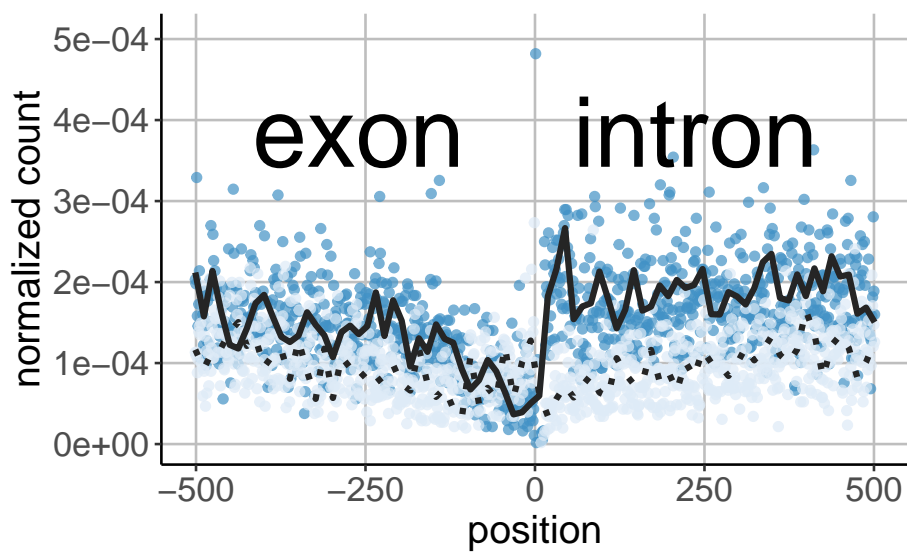

PABPC5-NUAKAAAKUURCN

•• antisense — sense    • antisense • sense

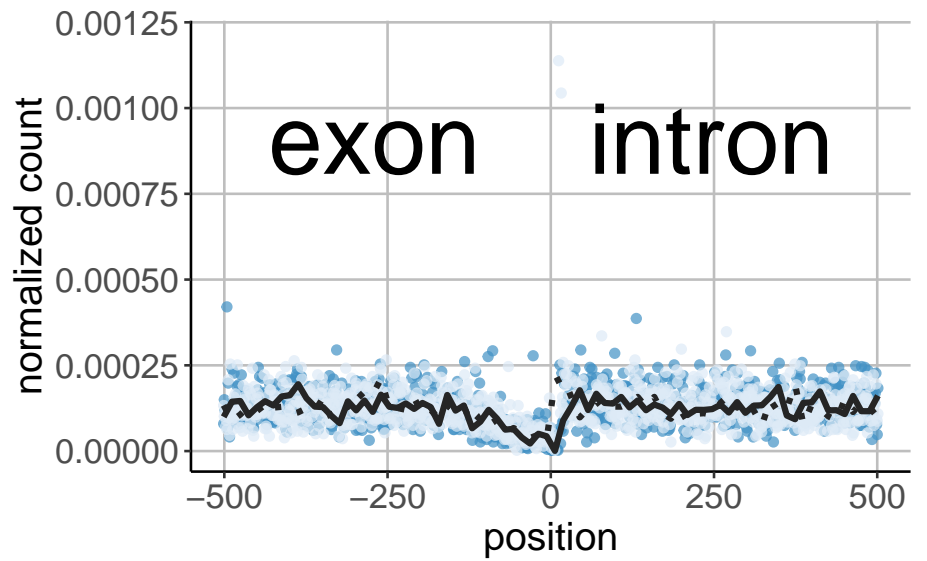

PABPC5-NUAKAAAUUACUACAN

•• antisense — sense    • antisense • sense

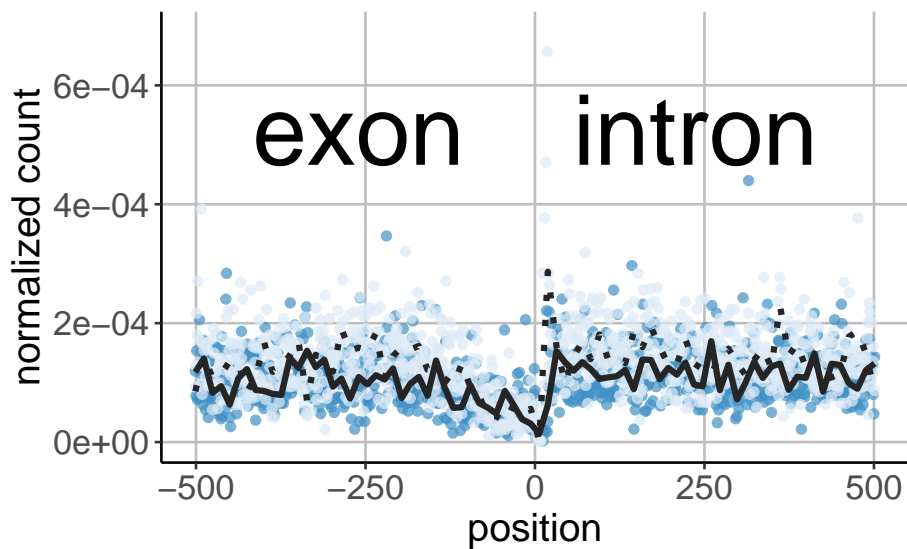

LARP7\_4-GRUCGUGAUGN

•• antisense — sense    • antisense • sense

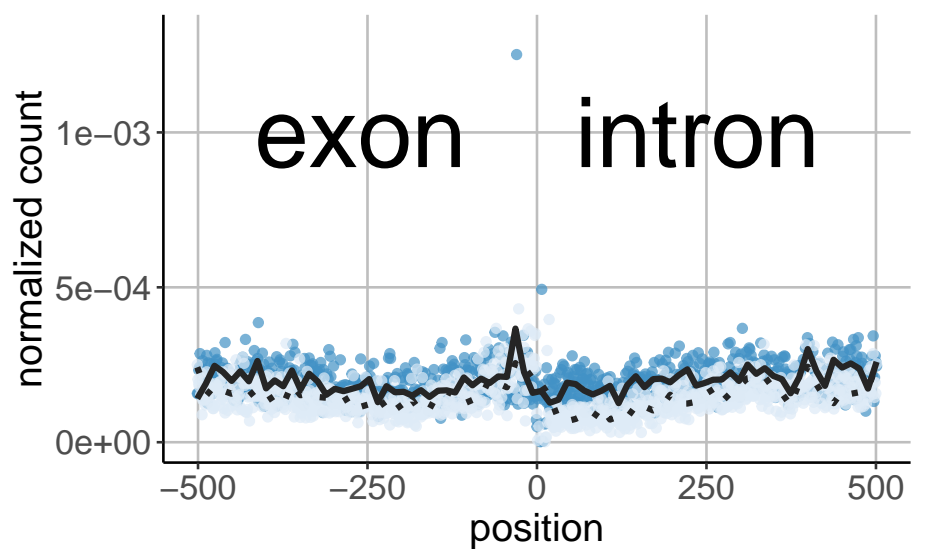

ZCRB1-GUAUUAAGGG

•• antisense — sense    • antisense • sense

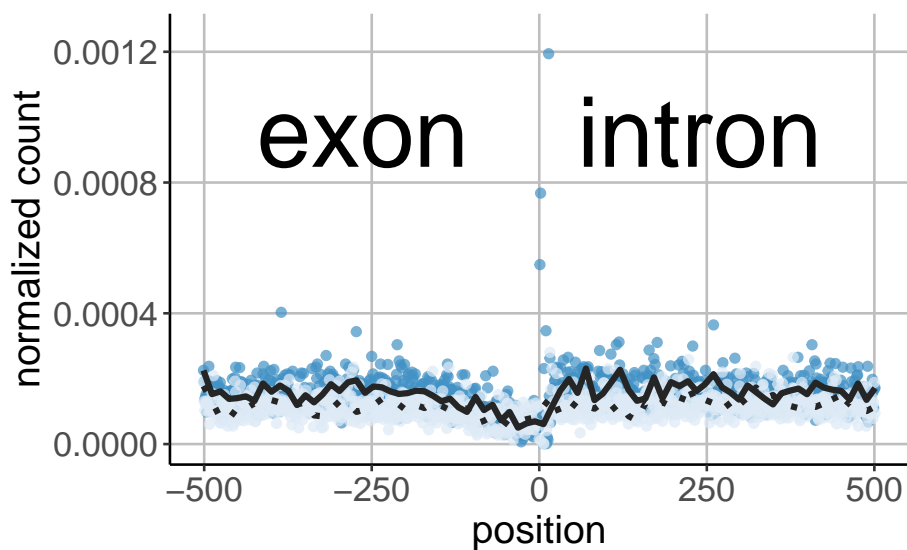

ZCRB1-GUGGACUUAANN

•• antisense — sense    • antisense • sense

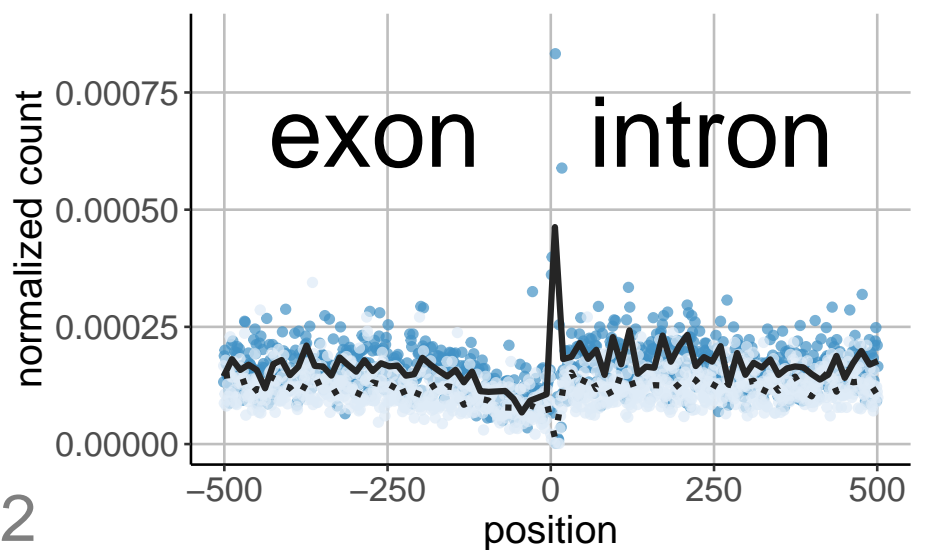

DONOR

RBM42-NGGAACUAAN

•• antisense — sense    • antisense • sense

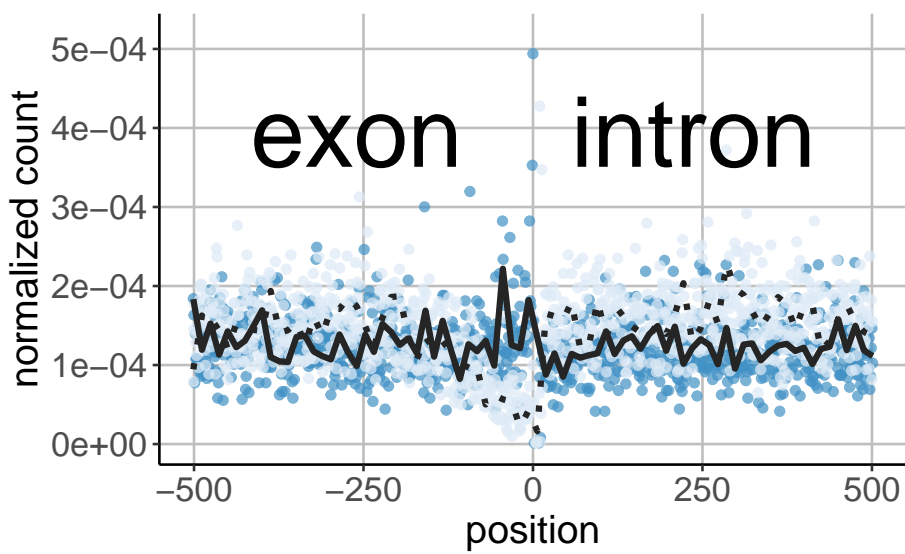

KHDRBS1-UAAUAGN

•• antisense — sense    • antisense • sense

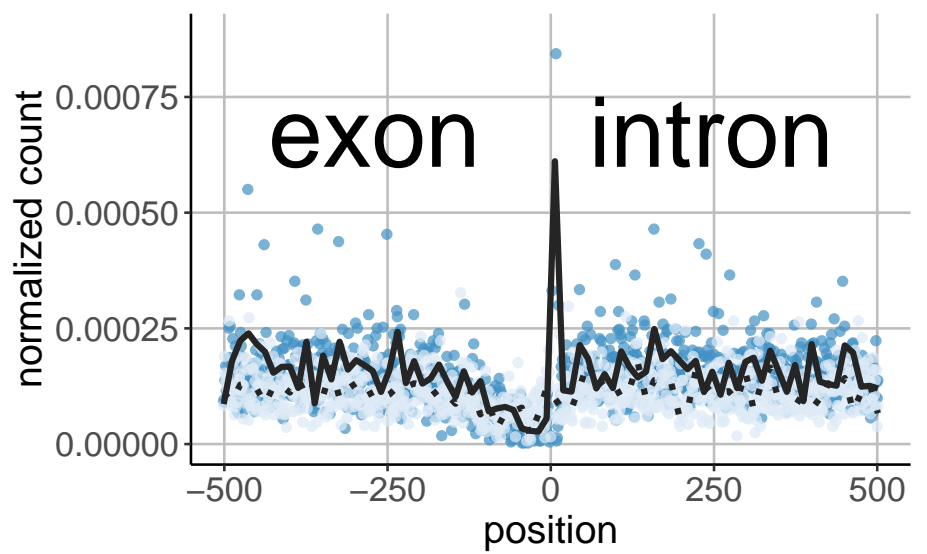

HNRNPCL1-GUUUUUUGGG

•• antisense — sense    • antisense • sense

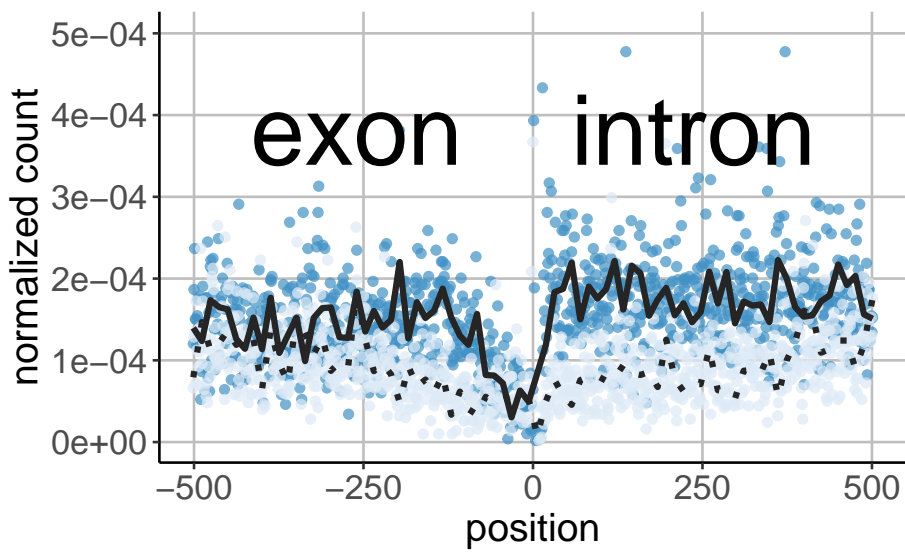

ZFR\_4-GUGACGGAUG

•• antisense — sense    • antisense • sense

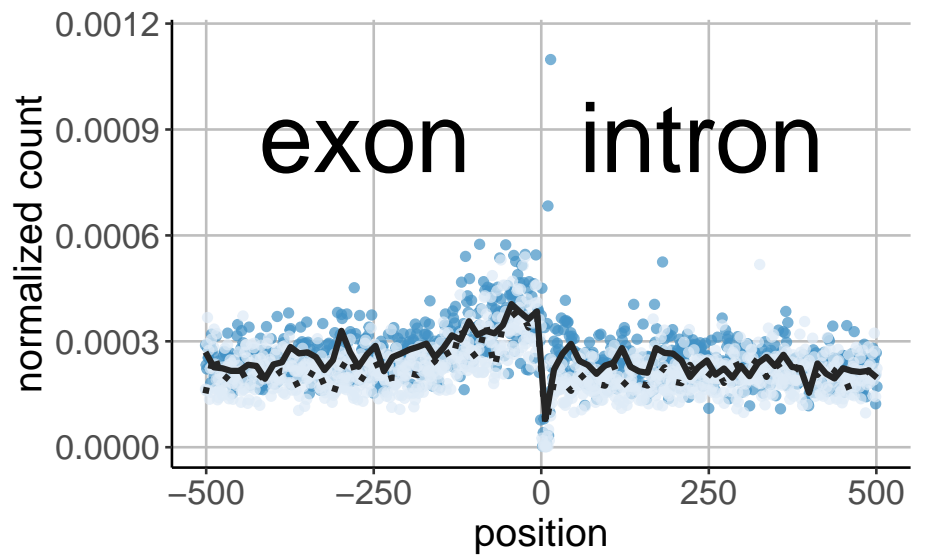

ZFR\_4-GUGCGGAUGN

•• antisense — sense    • antisense • sense

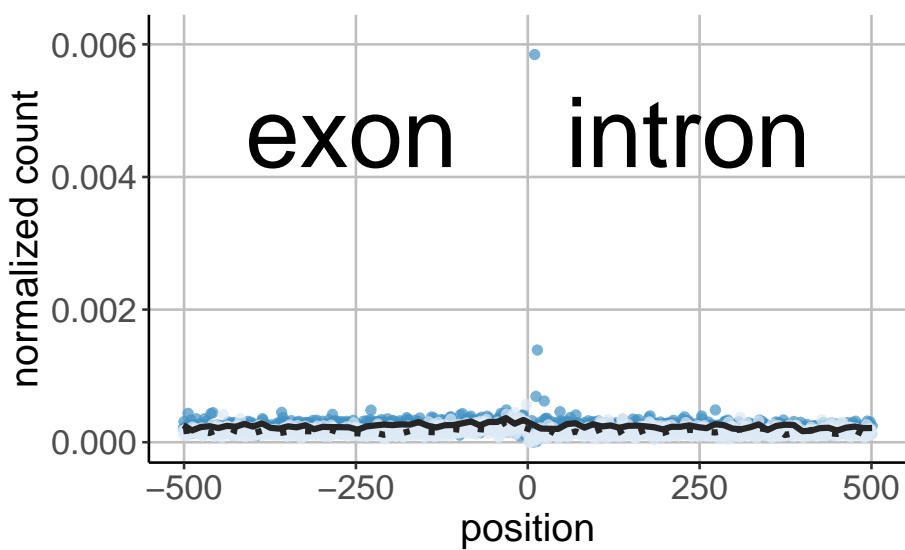

HNRPLL-GCAURCAYCC

•• antisense — sense    • antisense • sense

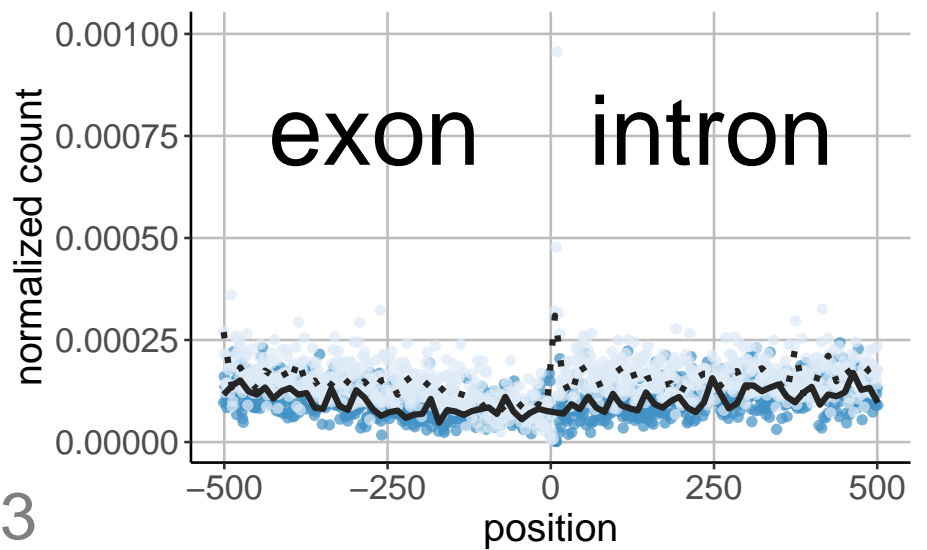

3

**DONOR**

ZC3H12C–NUGCGNCAGUCGGUAGC

•• antisense — sense    • antisense • sense

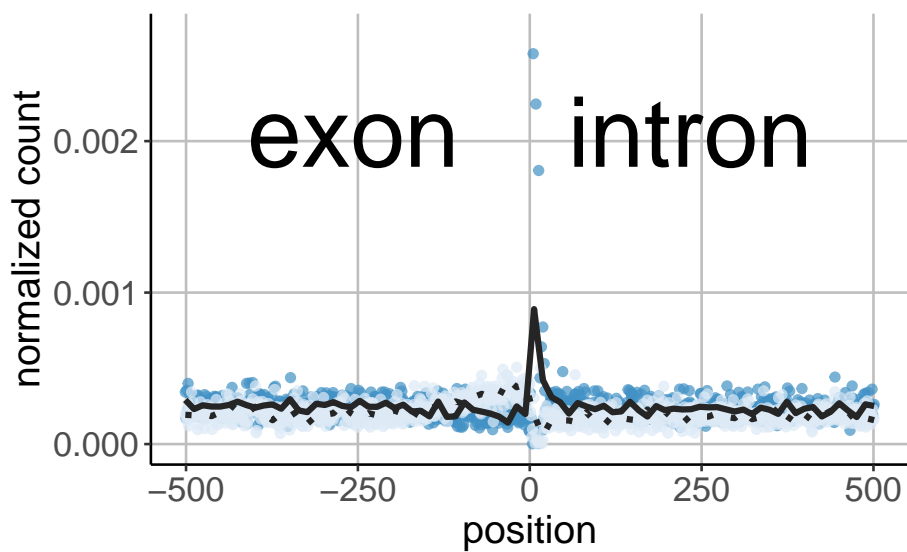

HNRNPL\_2–ACAUWWCAUW

•• antisense — sense    • antisense • sense

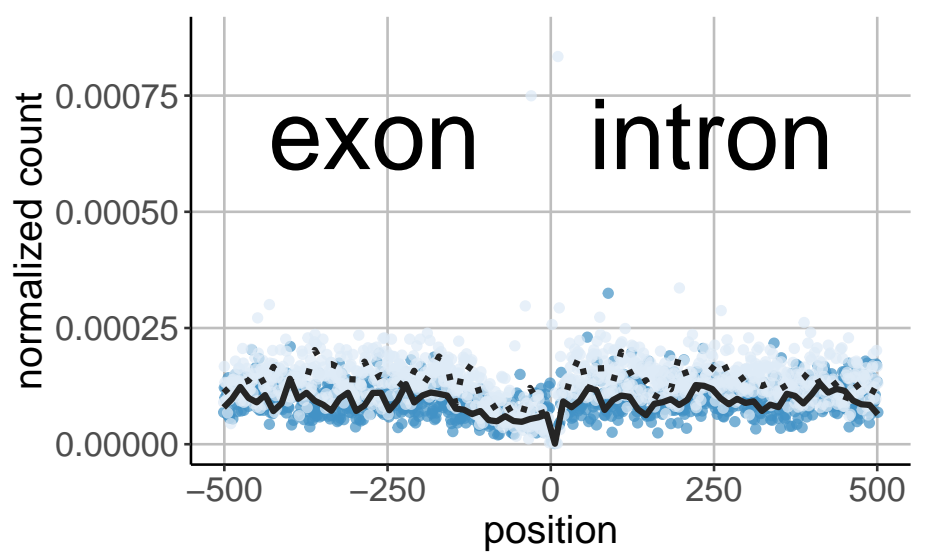

RBMS2–CAGUGAUUGG

•• antisense — sense    • antisense • sense

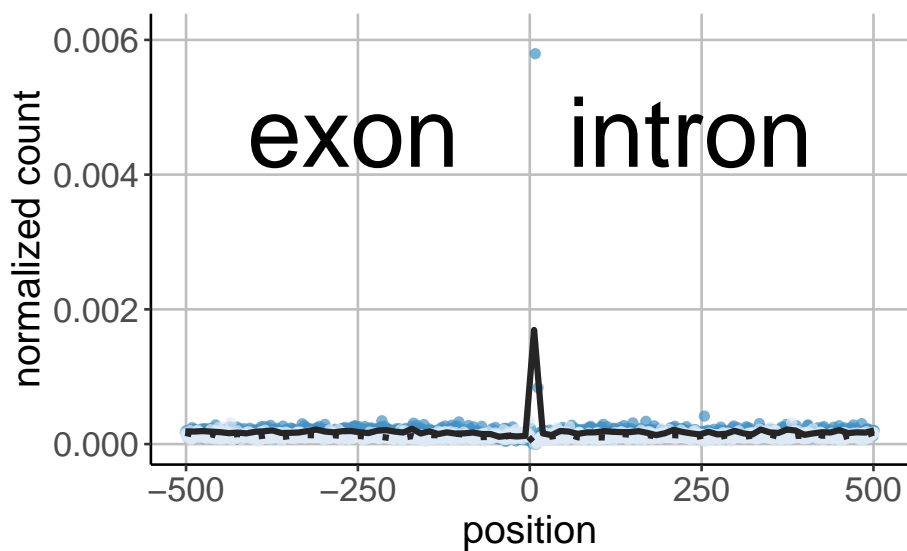

RBM14–GGKUGCGUCG

•• antisense — sense    • antisense • sense

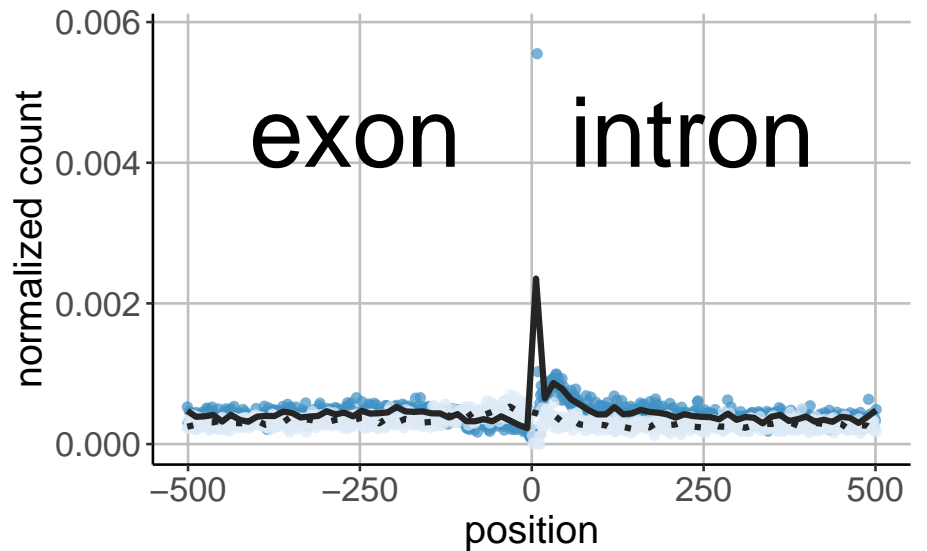

RBMS2–CGNUAUUAG

•• antisense — sense    • antisense • sense

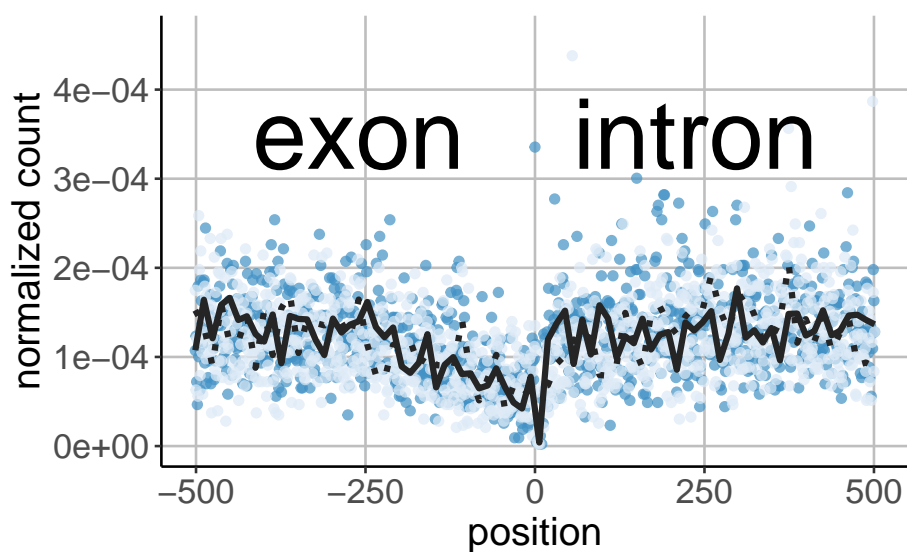

RBMS1–GUAUUUAKNGGG

•• antisense — sense    • antisense • sense

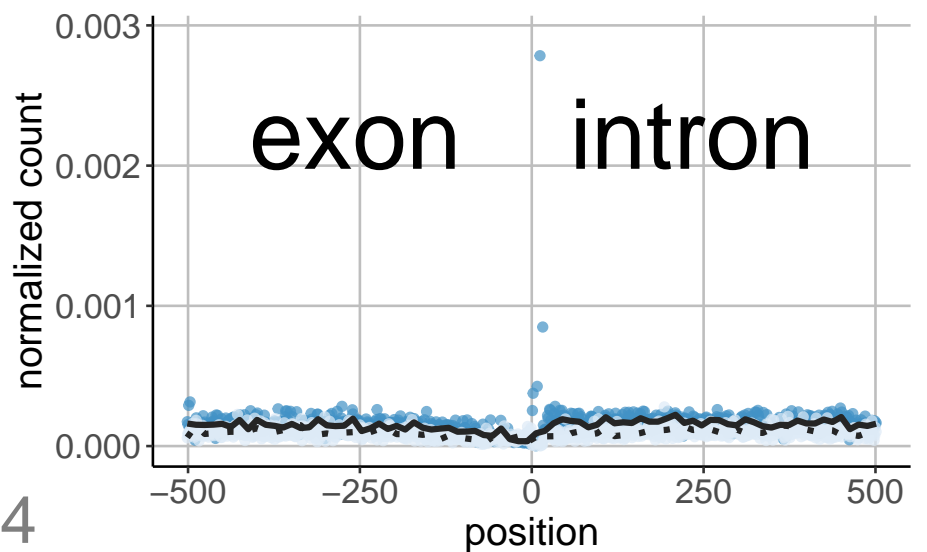

4

DONOR

RBMS1-UUAUAAUCAAC

•• antisense — sense    • antisense • sense

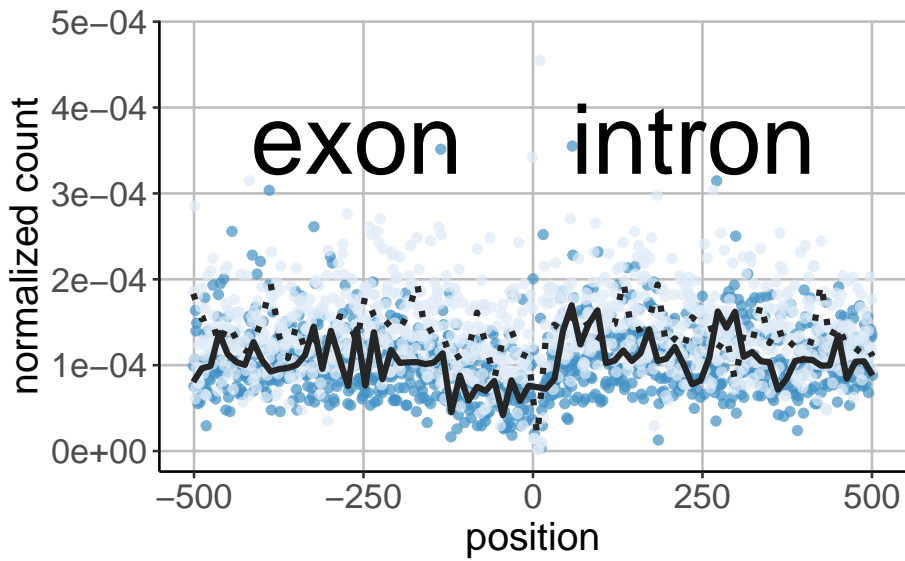

NOVA2\_3-UCAUUCAU

•• antisense — sense    • antisense • sense

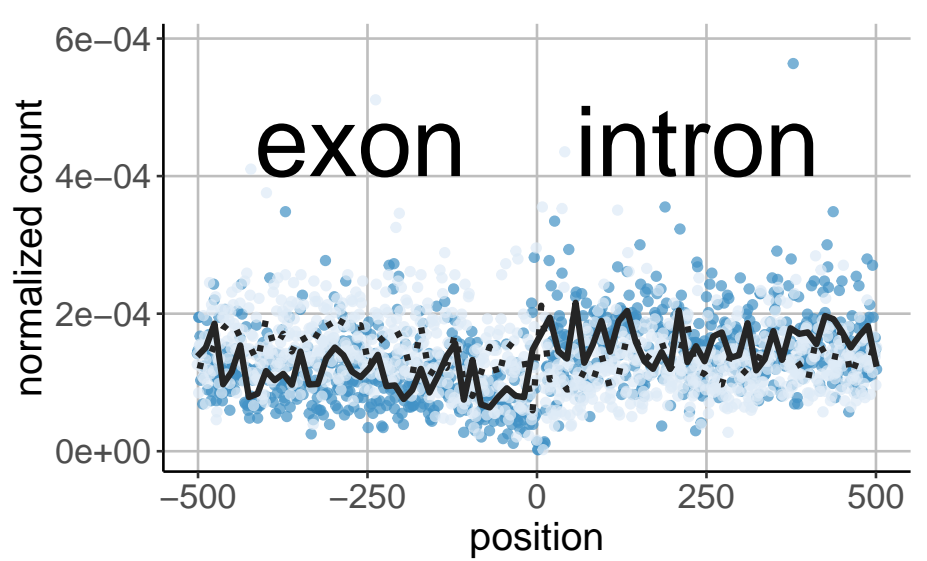

ZFP36-KUAUUUAUGGUGG

•• antisense — sense    • antisense • sense

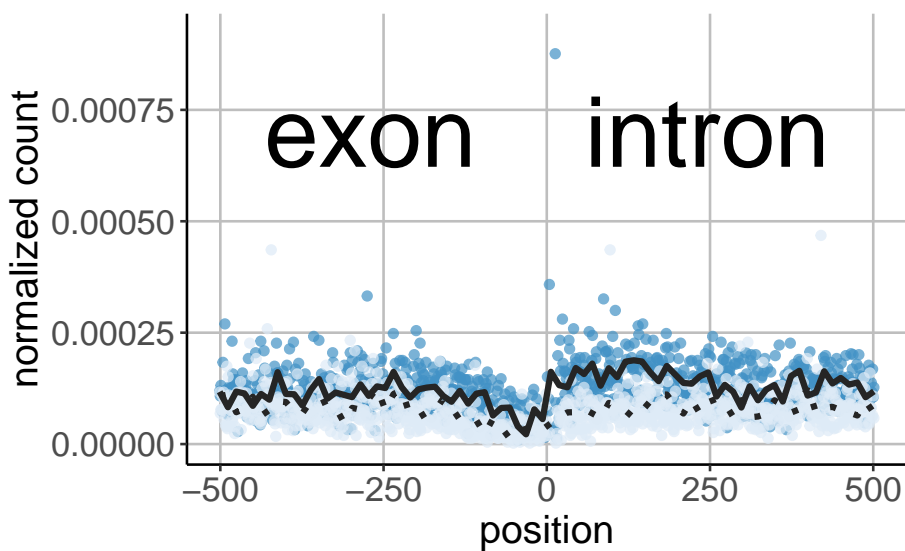

ZFP36-UUAUUUAUU

•• antisense — sense    • antisense • sense

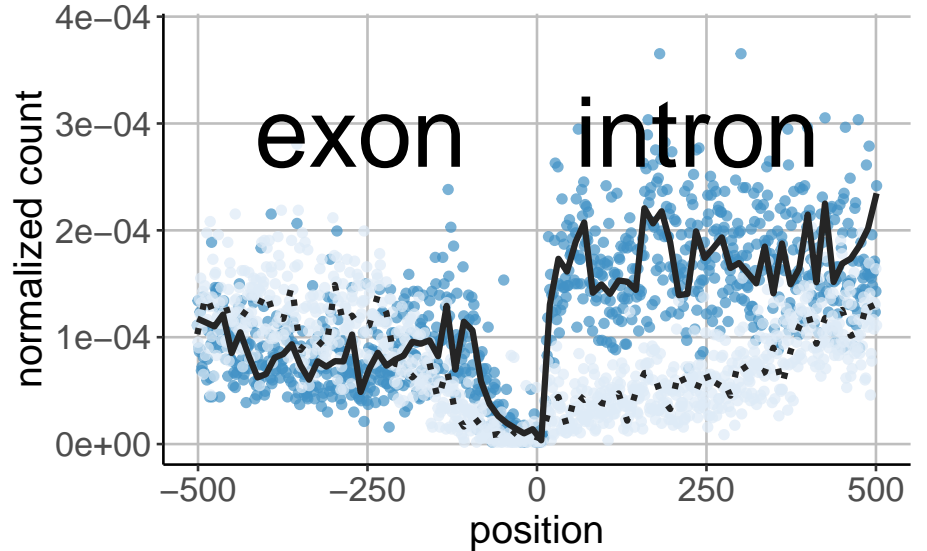

ELAVL4-UUUUAUUUUG

•• antisense — sense    • antisense • sense

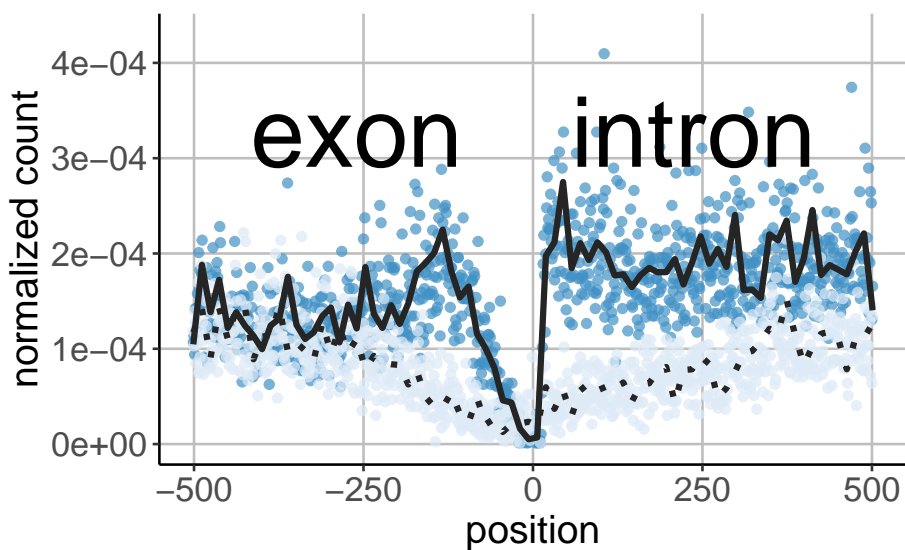

QKI-ACUAACANNACUAACA

•• antisense — sense    • antisense • sense

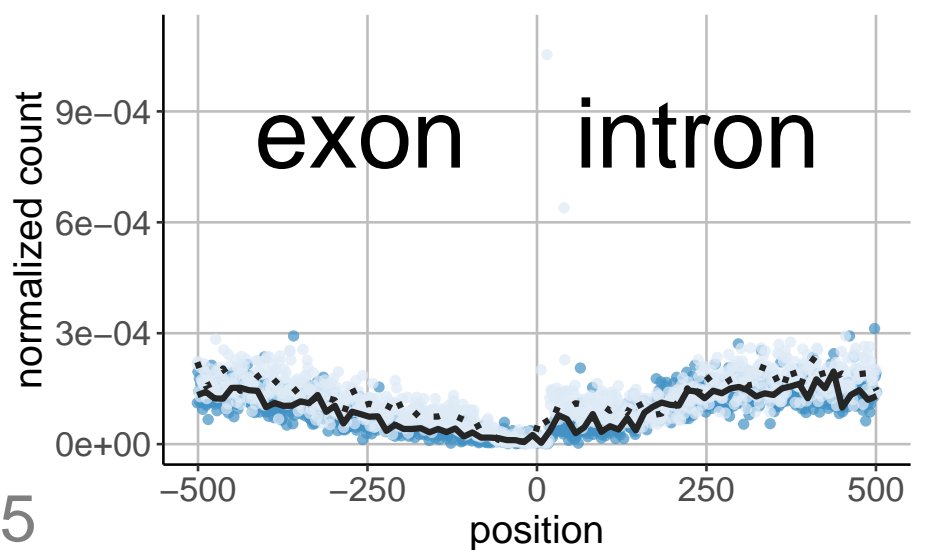

DONOR

TARDBP-GUGUGAAUGG

•• antisense — sense    • antisense • sense

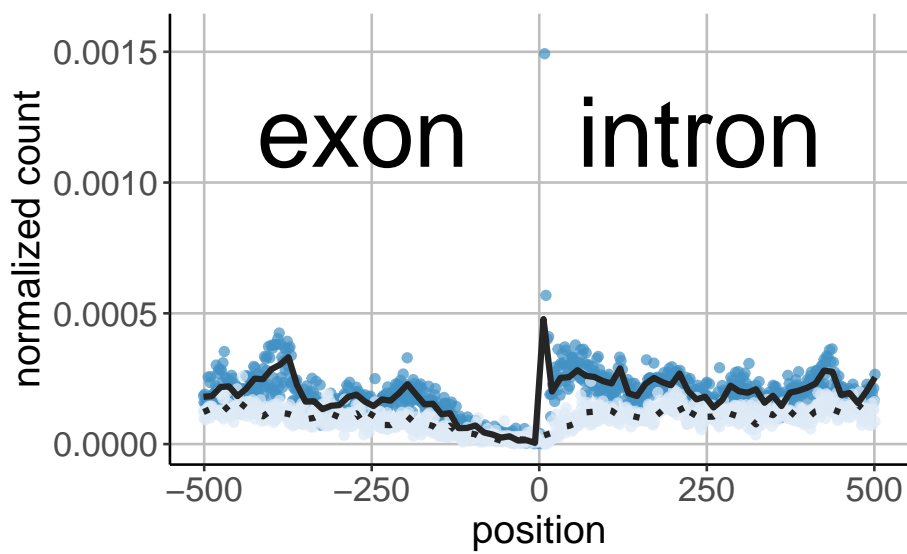

TARDBP-GUGUGNGUGUG

•• antisense — sense    • antisense • sense

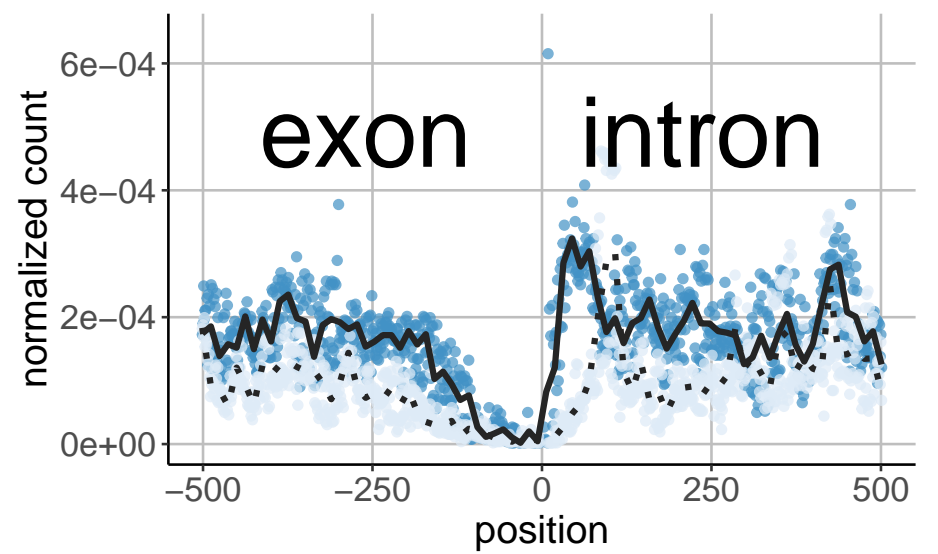

PUM2-NNUGUAYAGK

•• antisense — sense    • antisense • sense

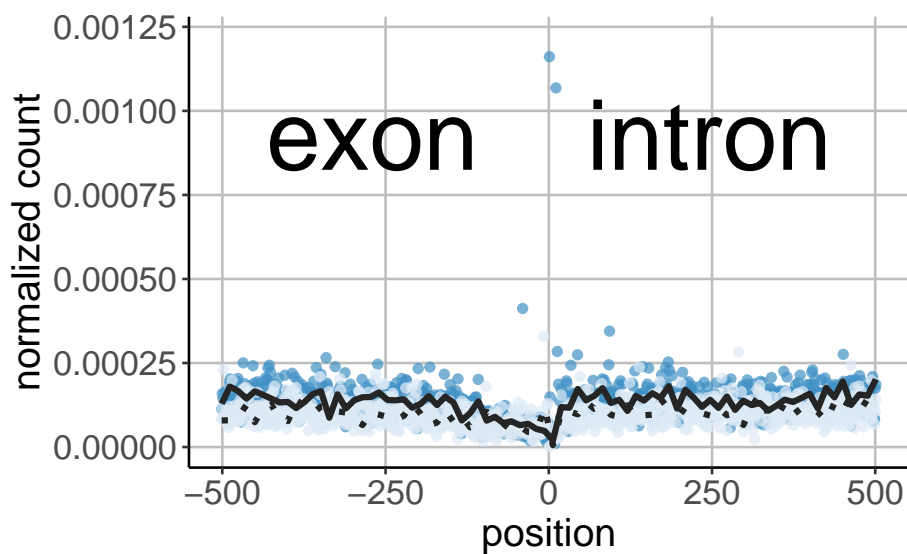

PUM2-NUGUAAAUAGKN

•• antisense — sense    • antisense • sense

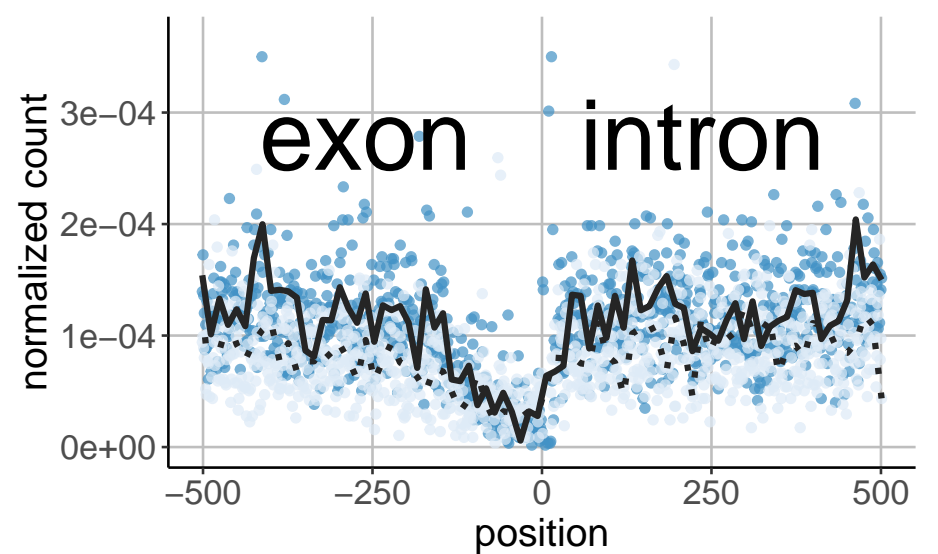

KHDRBS3-UAAANNNNNNUAAA

•• antisense — sense    • antisense • sense

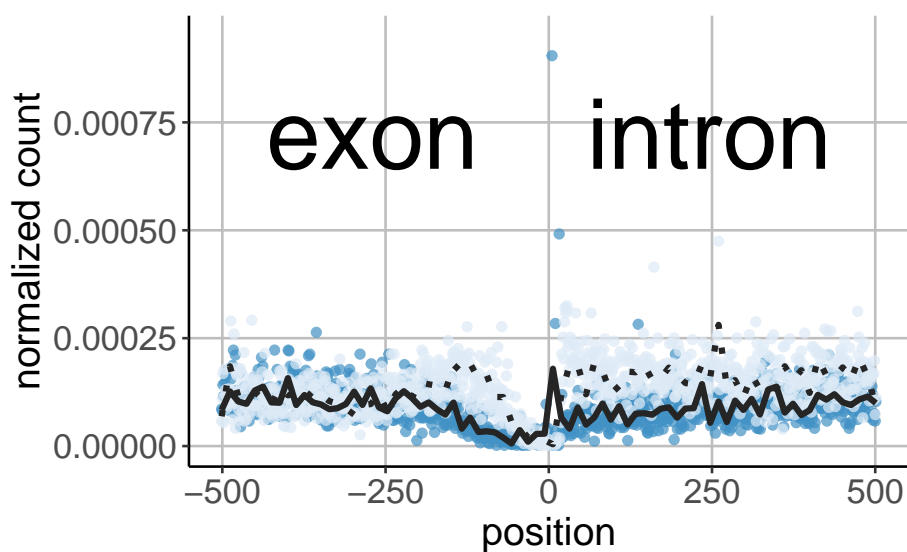

THUMPD1-UUCGUGGCUUG

•• antisense — sense    • antisense • sense

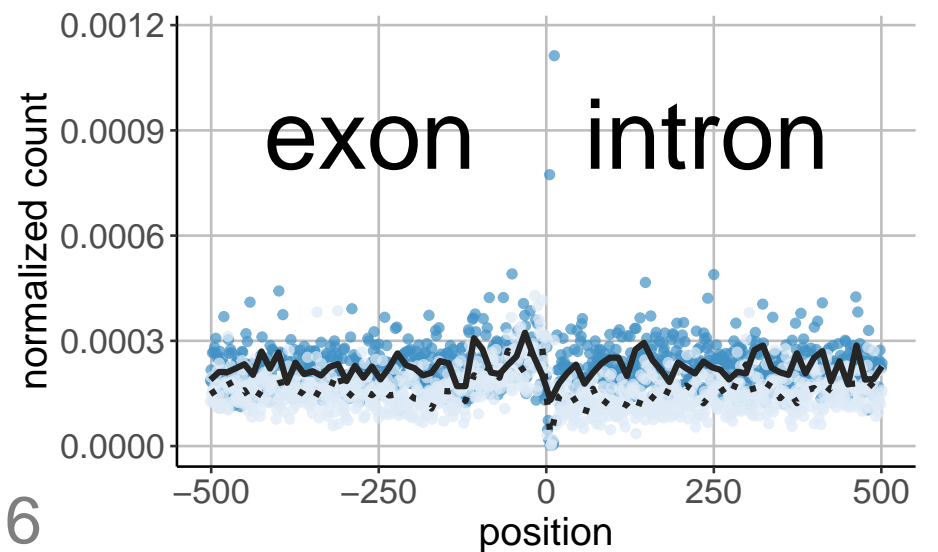

6

DONOR

THUMPD1-WGCGCGGUYUU

•• antisense — sense    • antisense • sense

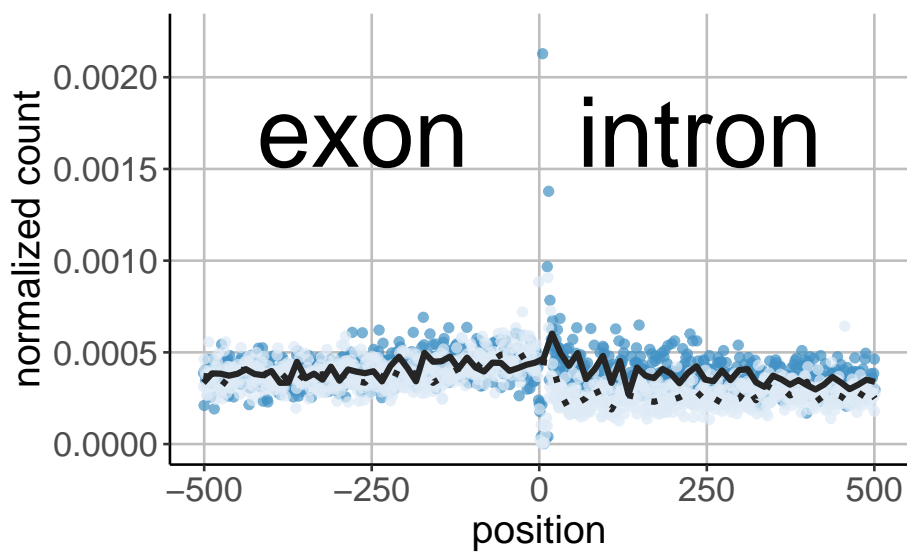

ZFR\_4-GGCACGGAUG

•• antisense — sense    • antisense • sense

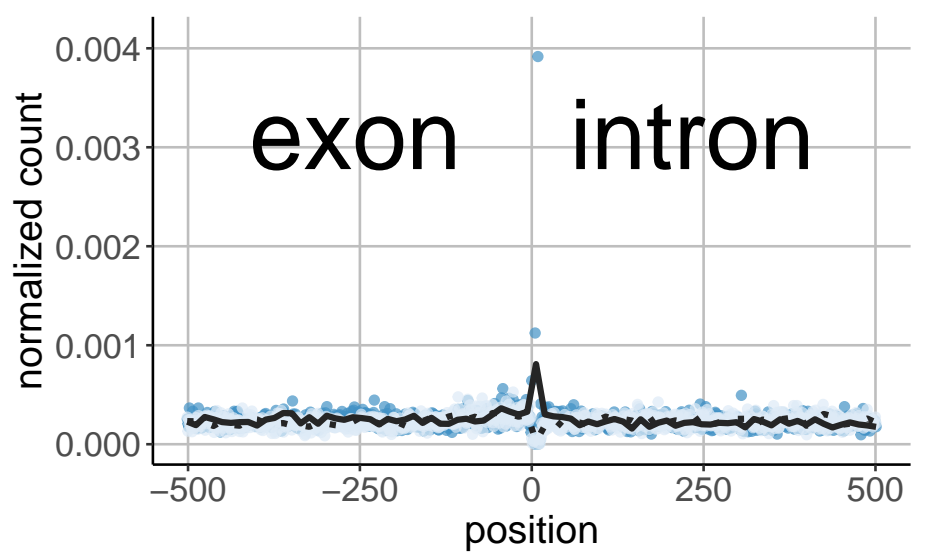

ZFR\_4-UUGCCGGAUGYCGU

•• antisense — sense    • antisense • sense

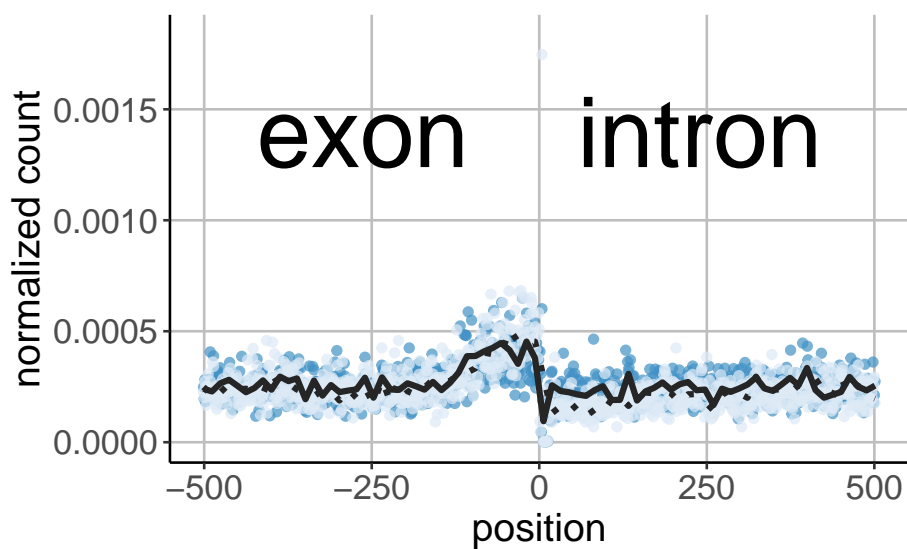

PCBP1-UCCUUNNCCUU

•• antisense — sense    • antisense • sense

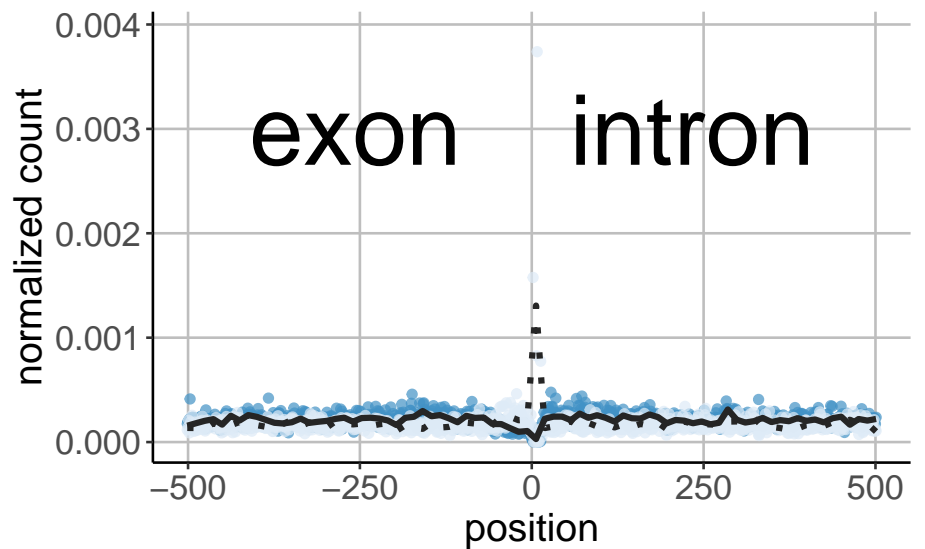

HNRNPA3-UAGGUUAGGG

•• antisense — sense    • antisense • sense

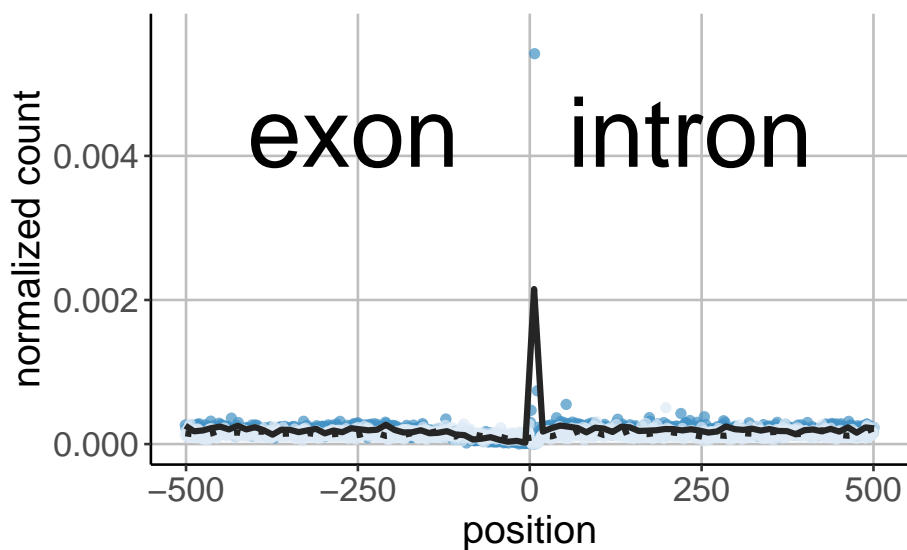

RBM38-KKGUGUGUGUGUUKK

•• antisense — sense    • antisense • sense

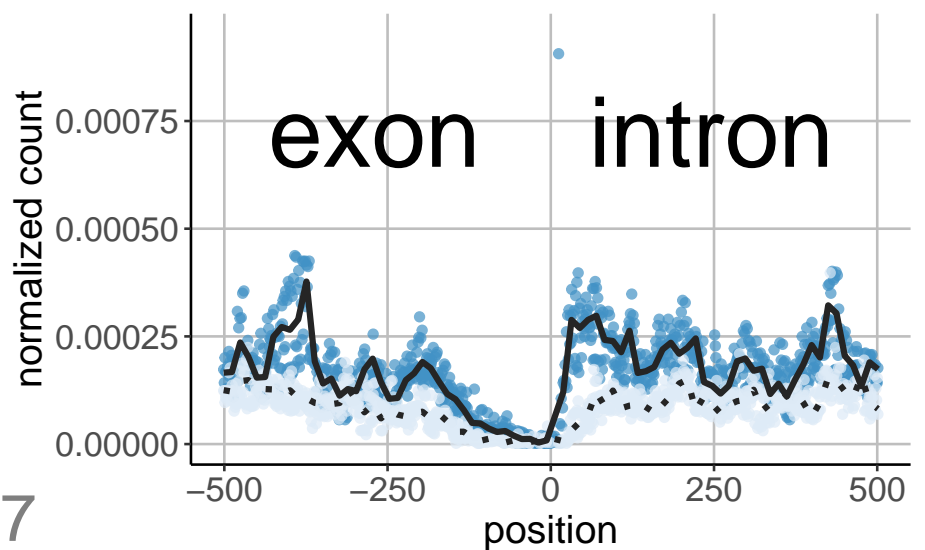



DONOR

MEX3D-UNURUUUAUU

•• antisense — sense    • antisense • sense

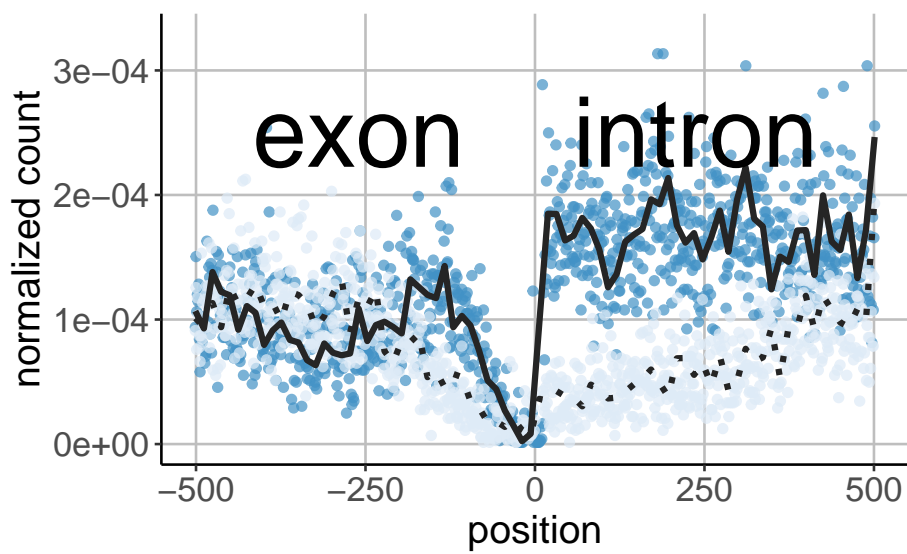

RBPM2-CACAGNGCACA

•• antisense — sense    • antisense • sense

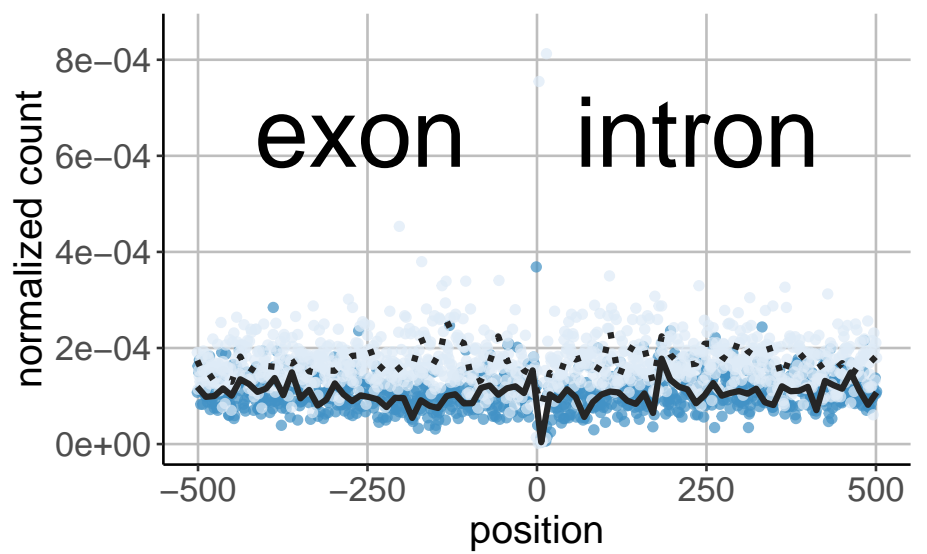

RBPM2-UCACRUGCACA

•• antisense — sense    • antisense • sense

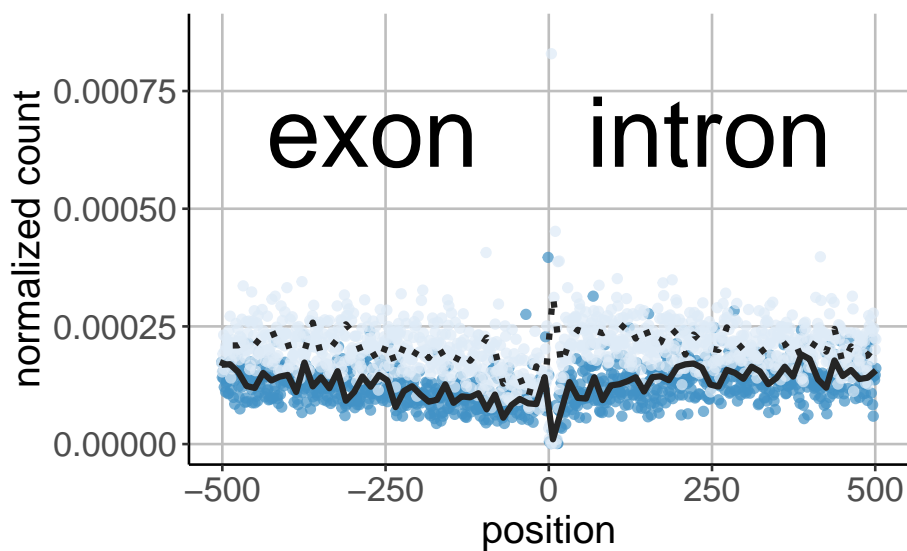

RBPM2-UGCACA

•• antisense — sense    • antisense • sense

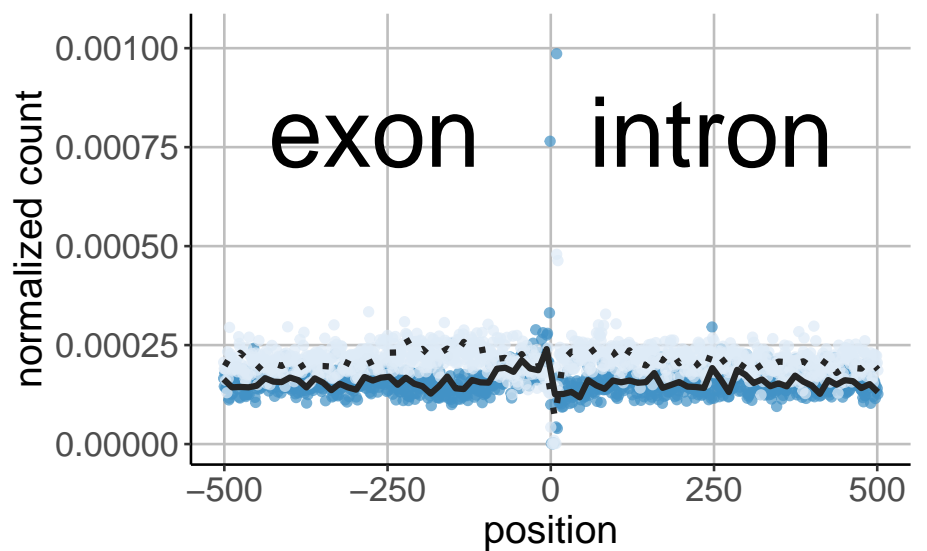

YBX2-GCCAUNNNAUCGC

•• antisense — sense    • antisense • sense

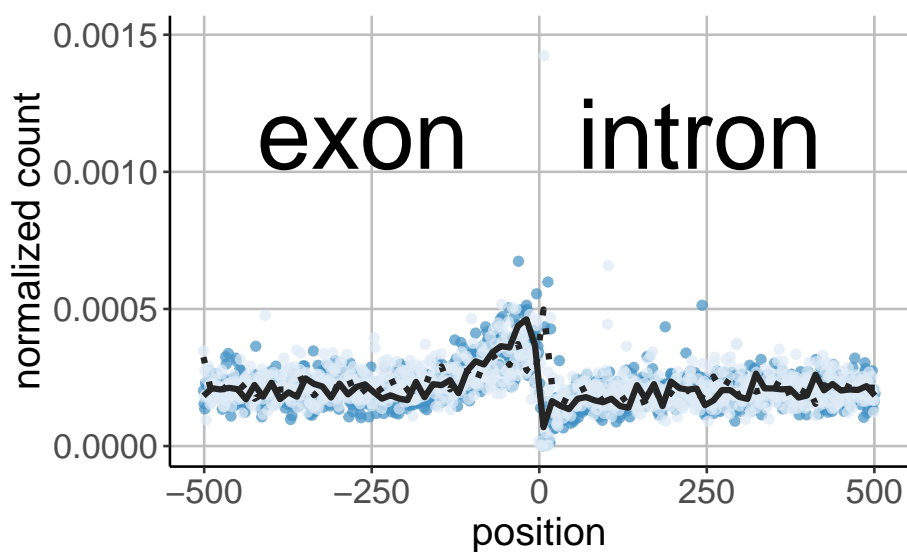

YBX2-NUAACAUCNN

•• antisense — sense    • antisense • sense

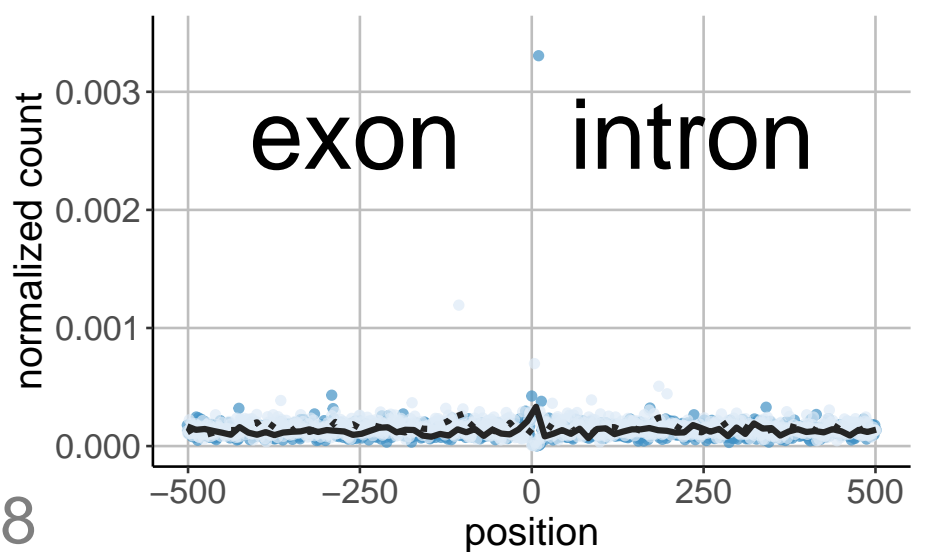

DONOR

CSTF2T-CGUAGCGUCU

• antisense — sense    • antisense • sense

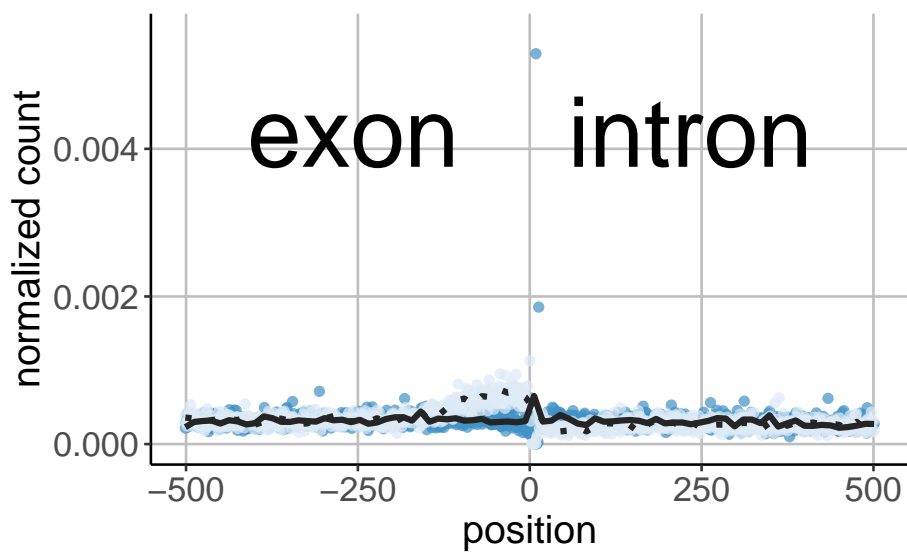

SNRNP70-GNUCANGNNG

• antisense — sense    • antisense • sense

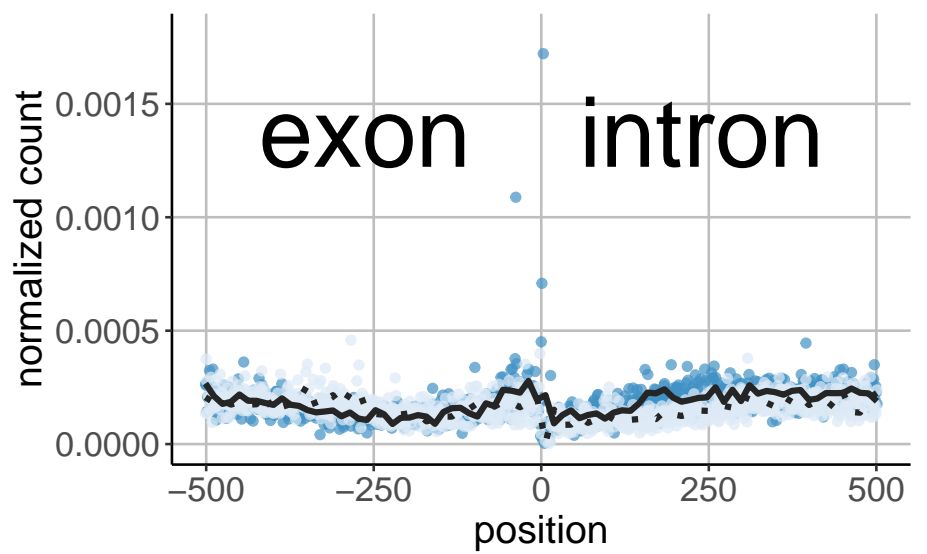

SNRNP70-GUUCAAGGUG

• antisense — sense    • antisense • sense

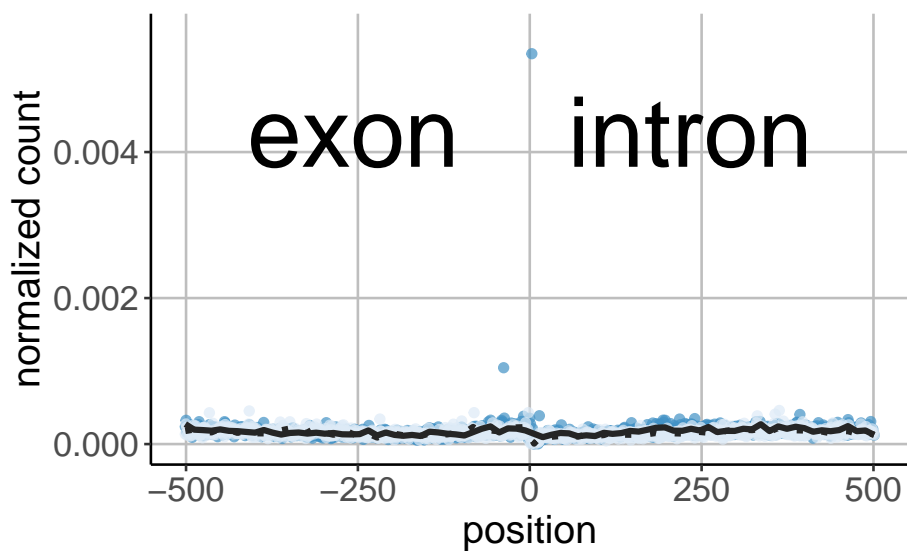

DAZ4-GYUCUAGUUAGYAUC

• antisense — sense    • antisense • sense

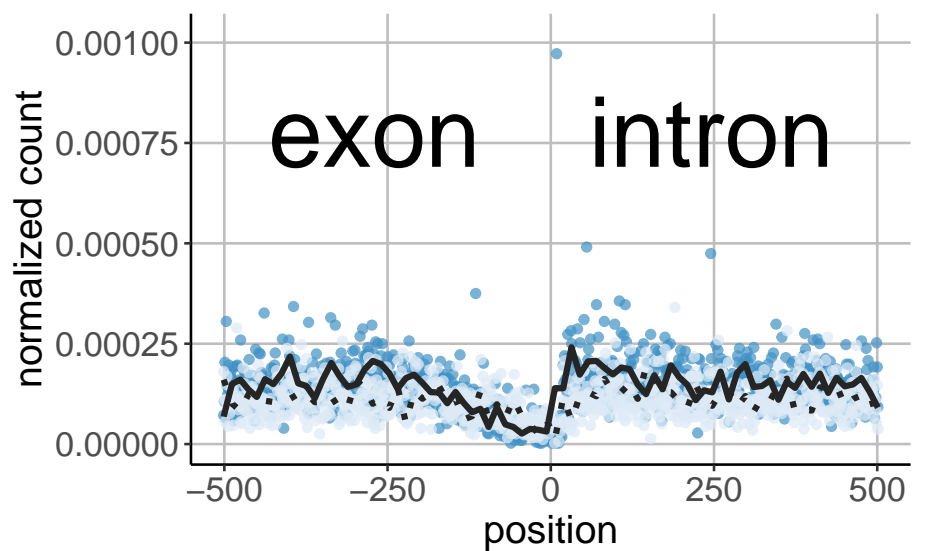

IGF2BP1-CAGNUWCA

• antisense — sense    • antisense • sense

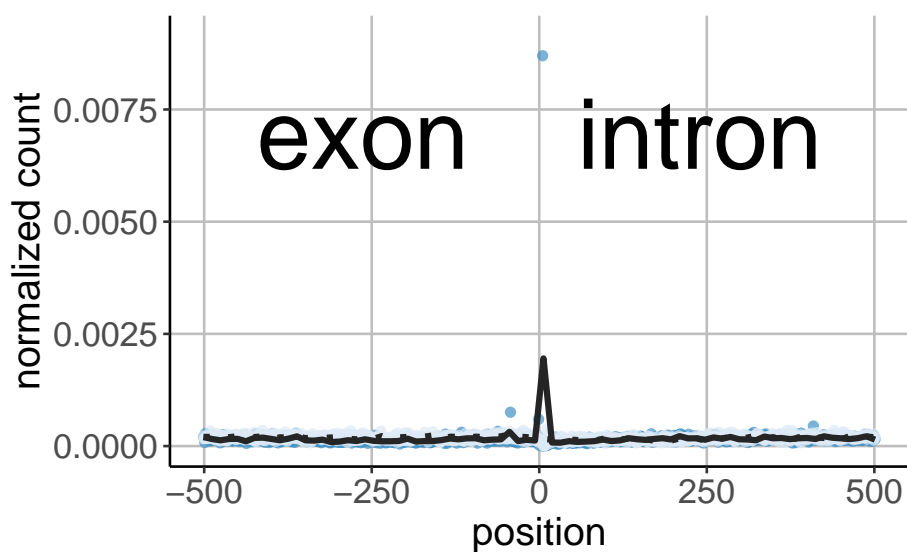

HEXIM2-NGCGACGGKN

• antisense — sense    • antisense • sense

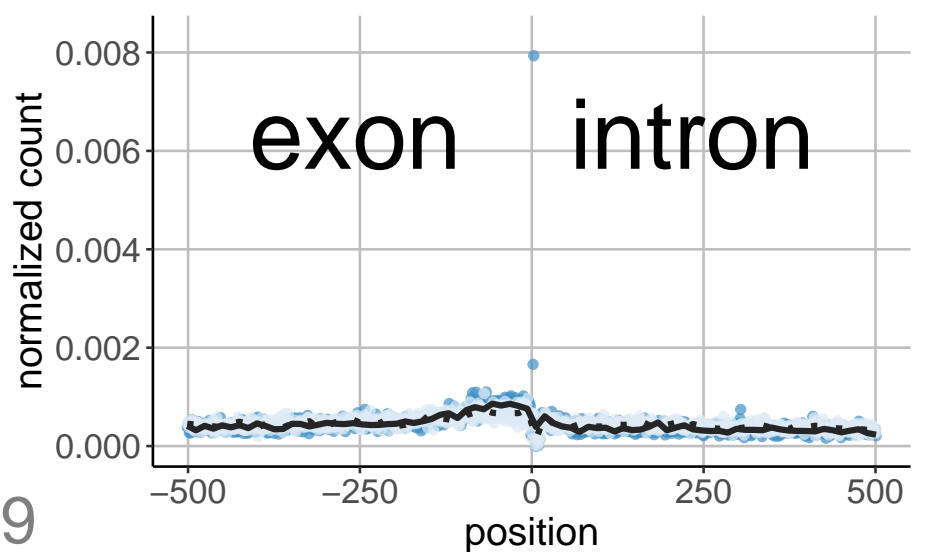

DONOR

YBX1-NUAACAUCGGG

•• antisense — sense    • antisense • sense

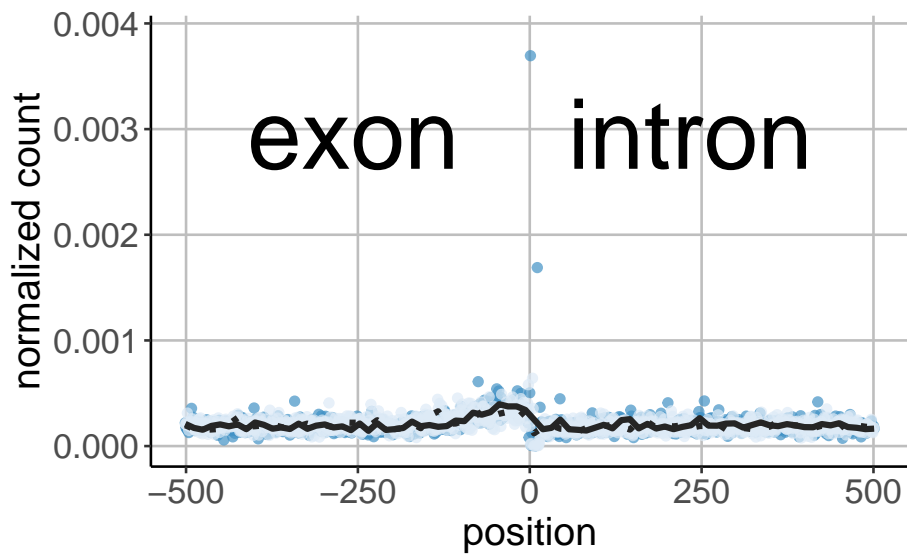

RBM24-GUGUGNGUGUG

•• antisense — sense    • antisense • sense

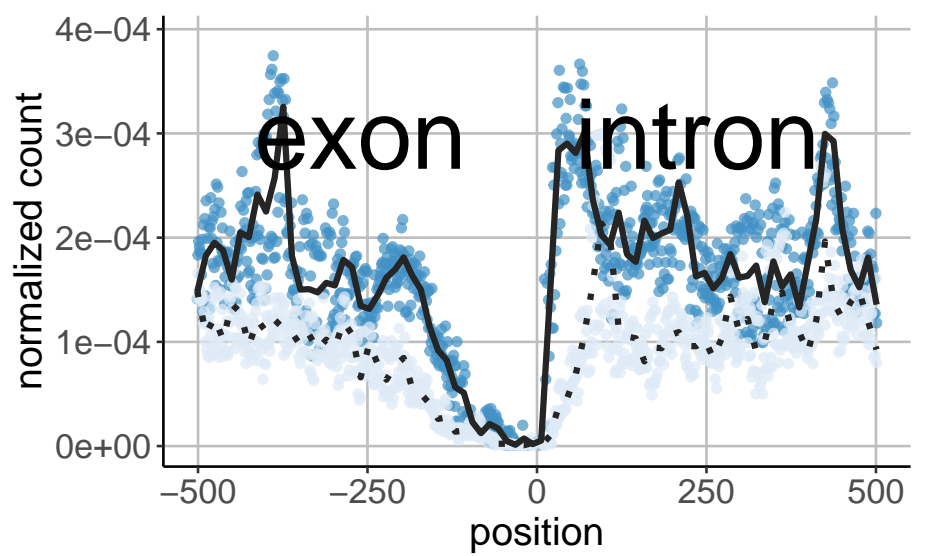

CSDA-UAACAUCA

•• antisense — sense    • antisense • sense

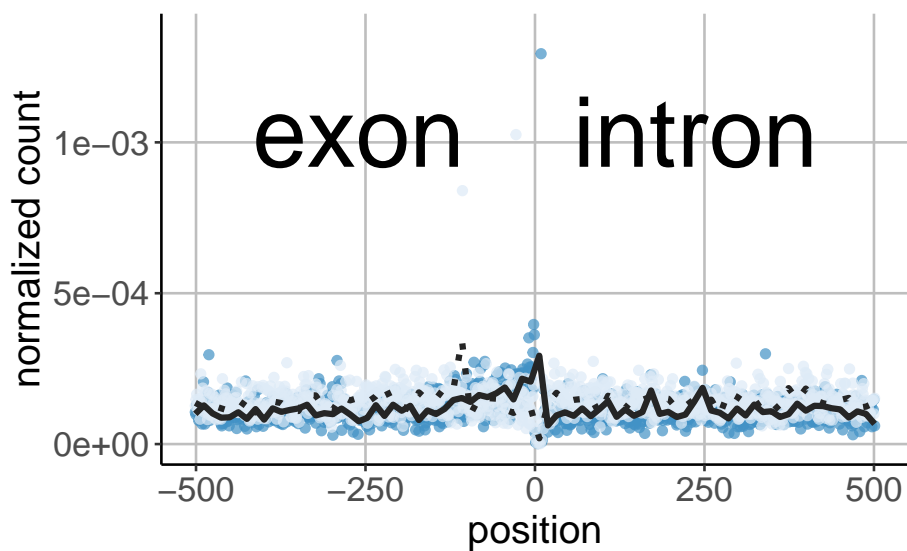

HNRNPA1L2-NUAGGUUAGGGW

•• antisense — sense    • antisense • sense

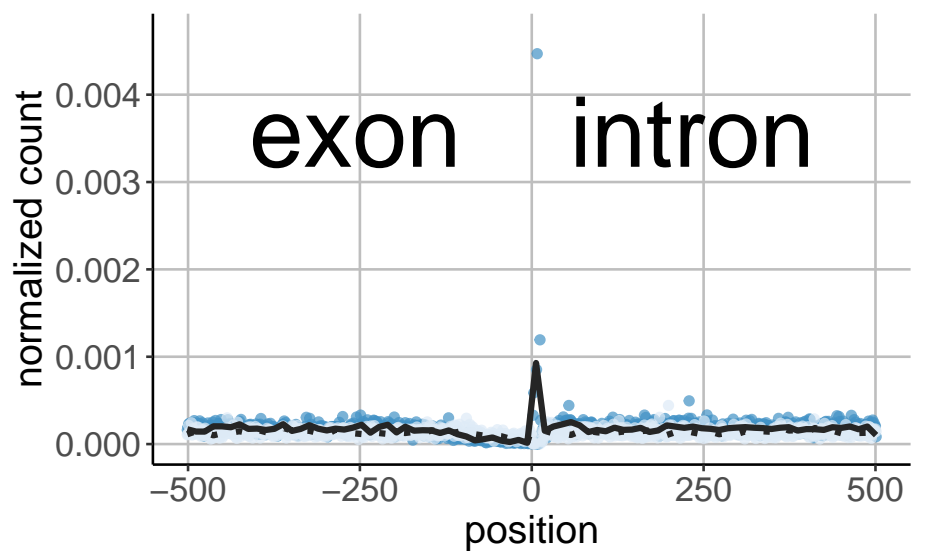

ZC3H12B-NGCGNCAGUCGGUAGCN

•• antisense — sense    • antisense • sense

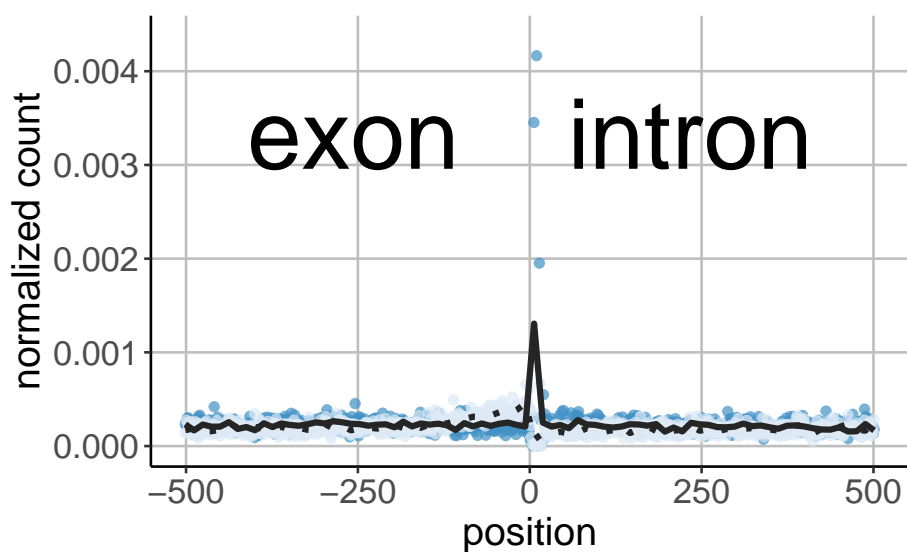

ZC3H12A-NUUGCCAWAGUKU

•• antisense — sense    • antisense • sense

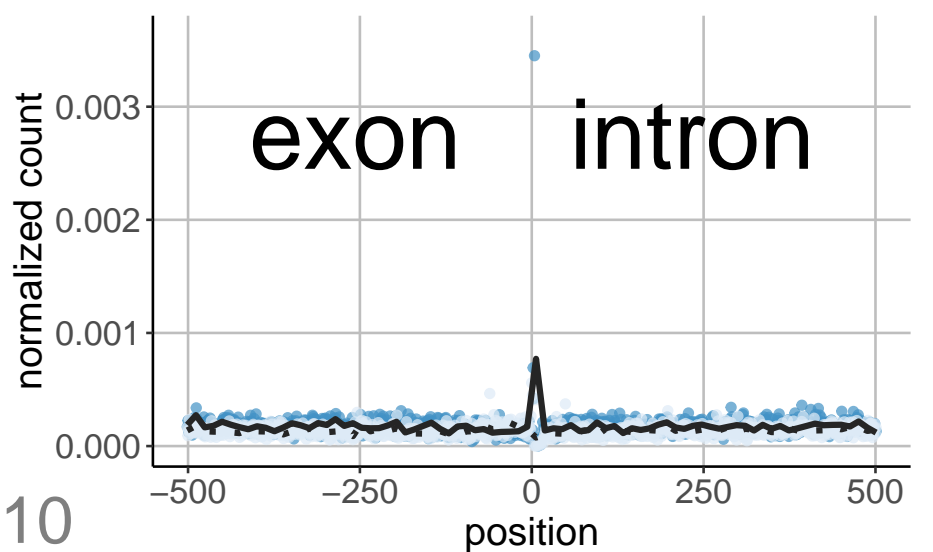

10

DONOR

DAZAP1-UUAGGUUAGG

•• antisense — sense    • antisense • sense

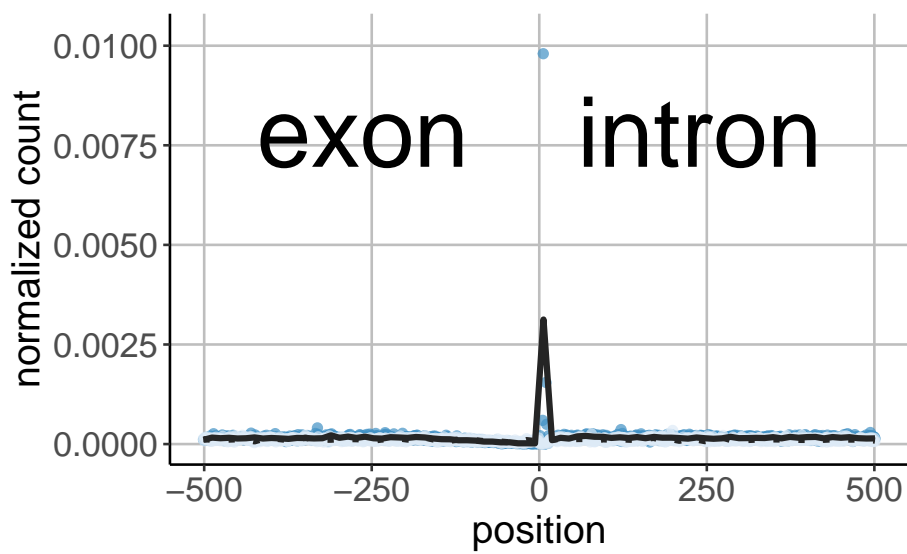

CARHSP1-GCCAUGAUGAU

•• antisense — sense    • antisense • sense

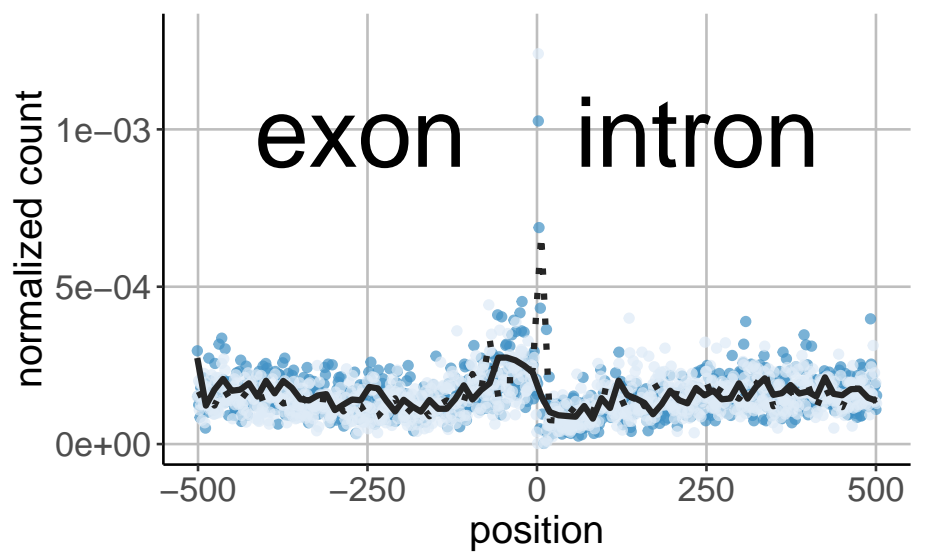

CARHSP1-UUGCCUUGUCCCGAU

•• antisense — sense    • antisense • sense

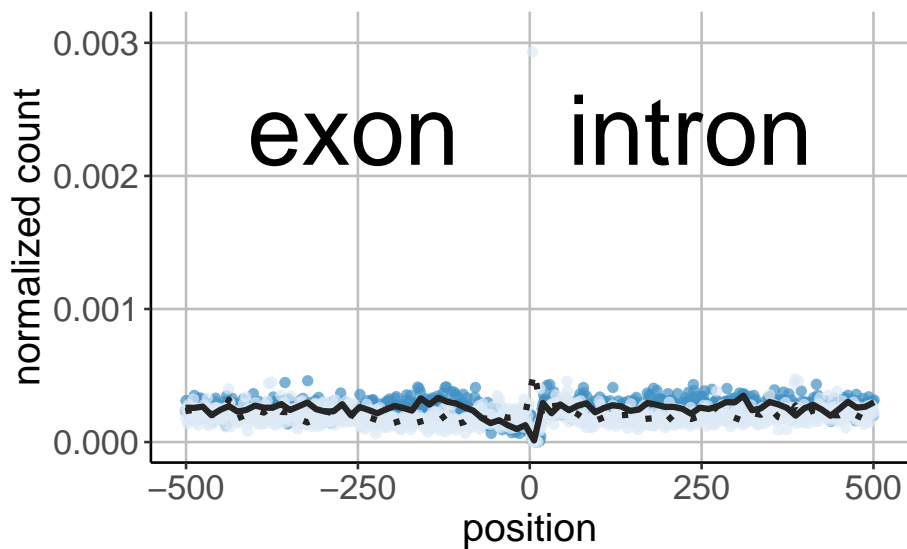

RNPC3-GGGUSUACGGGGU

•• antisense — sense    • antisense • sense

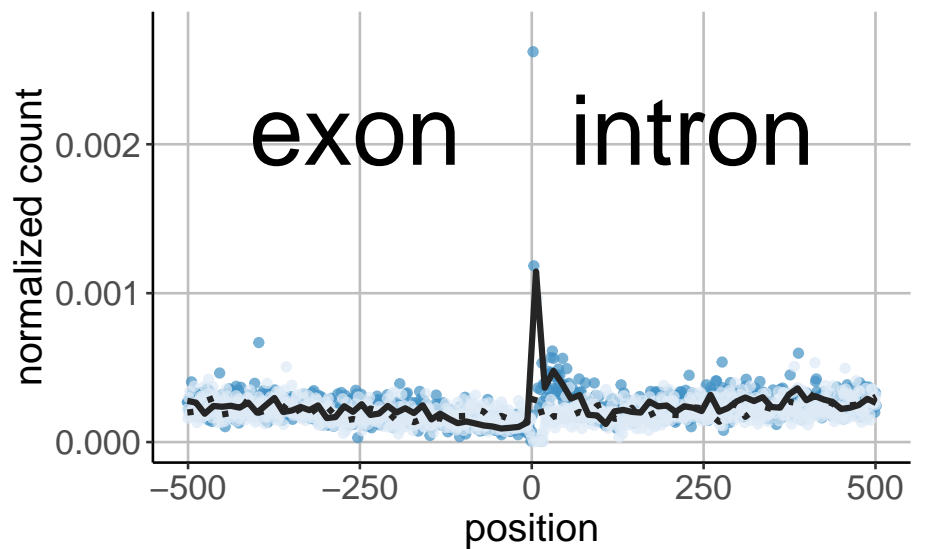

ELAVL1-UUUAUGNUUU

•• antisense — sense    • antisense • sense

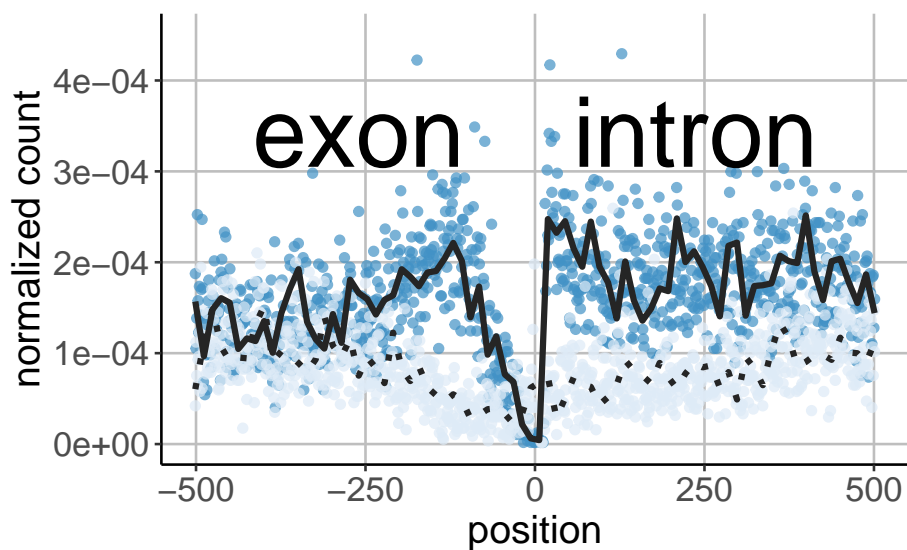

RBM46-GUGAUUG

•• antisense — sense    • antisense • sense

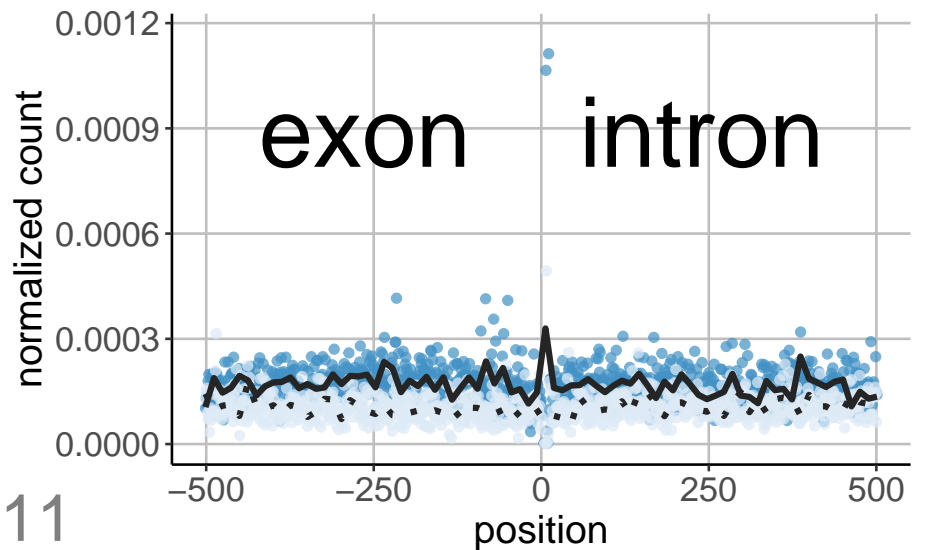

DONOR

ESRP1\_3-GGUGUGGUGU

•• antisense — sense    • antisense • sense

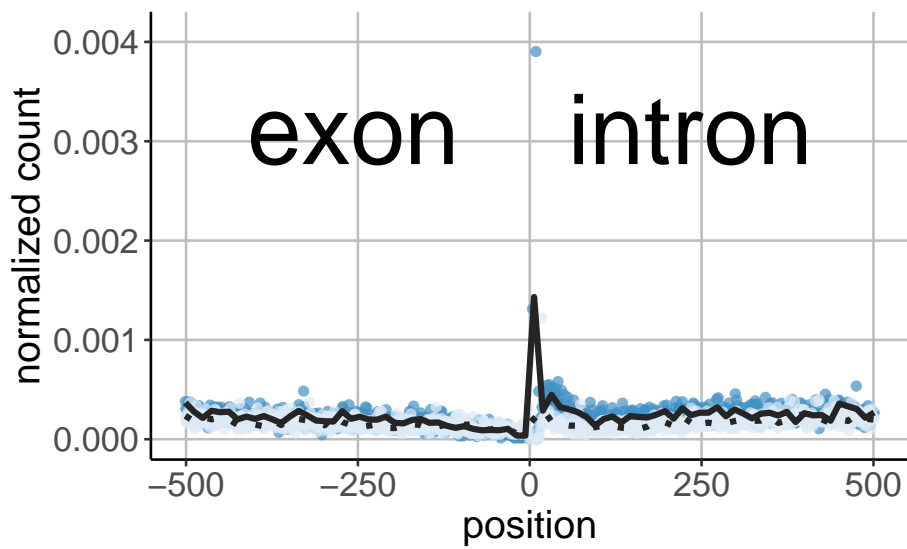

SNRPB2-GGGUGUGCAC

•• antisense — sense    • antisense • sense

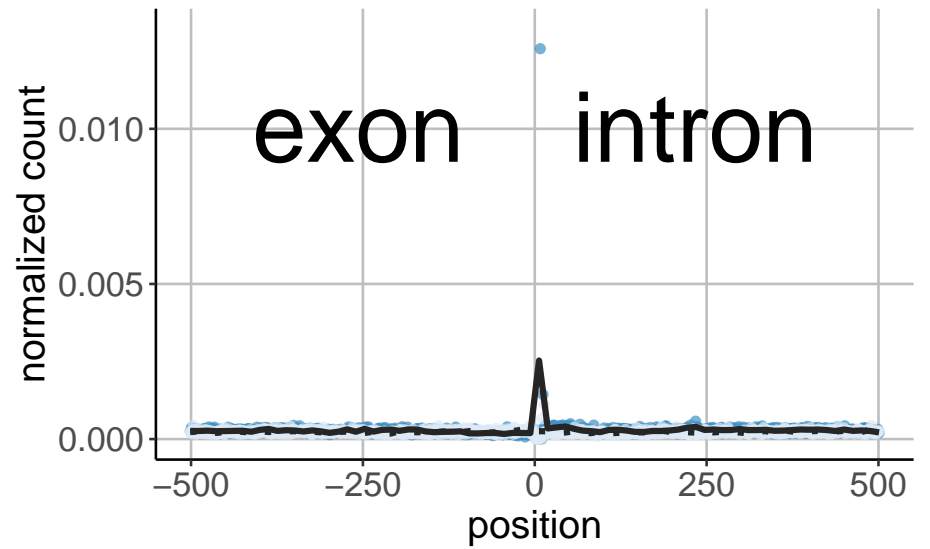

SNRPB2-NNCAUUGCACN

•• antisense — sense    • antisense • sense

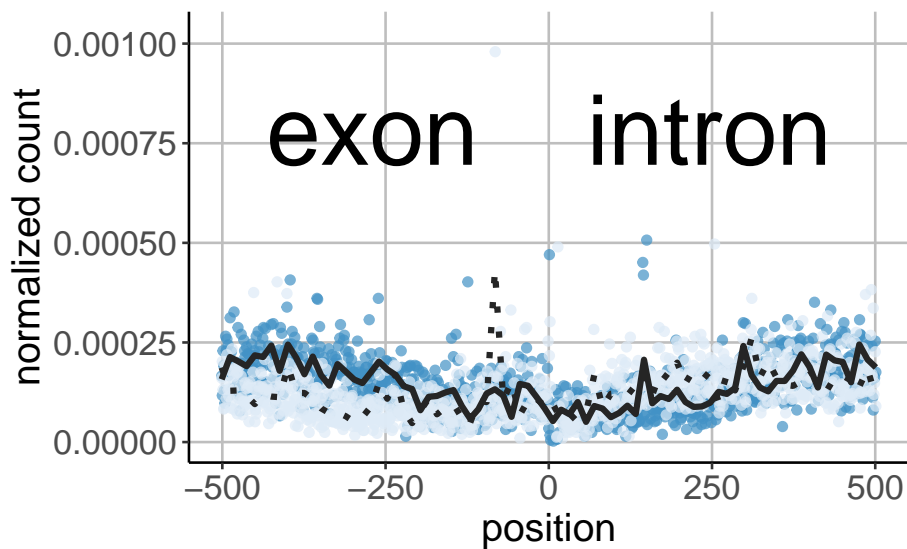

MEX3C-NNAGAGUUUAUNN

•• antisense — sense    • antisense • sense

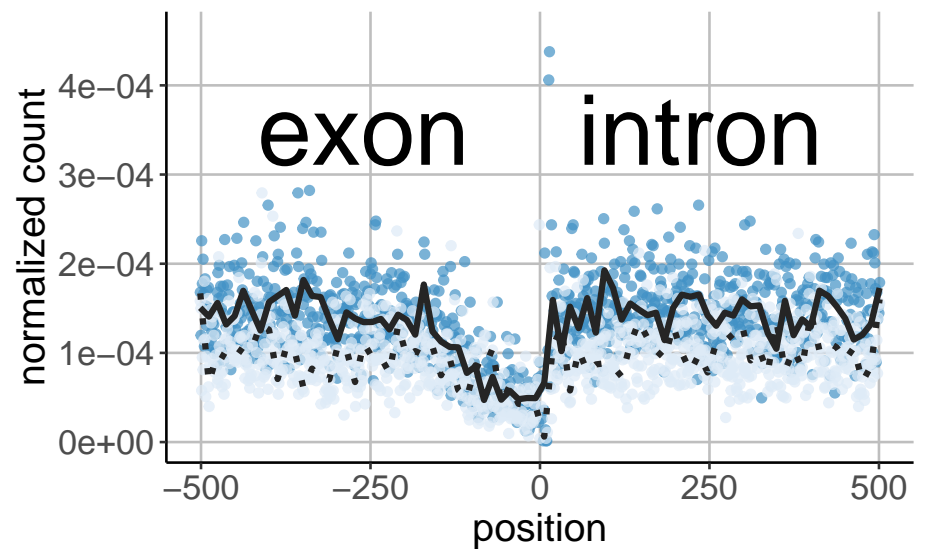

HNRNPA0-KUAGKUUAGGK

•• antisense — sense    • antisense • sense

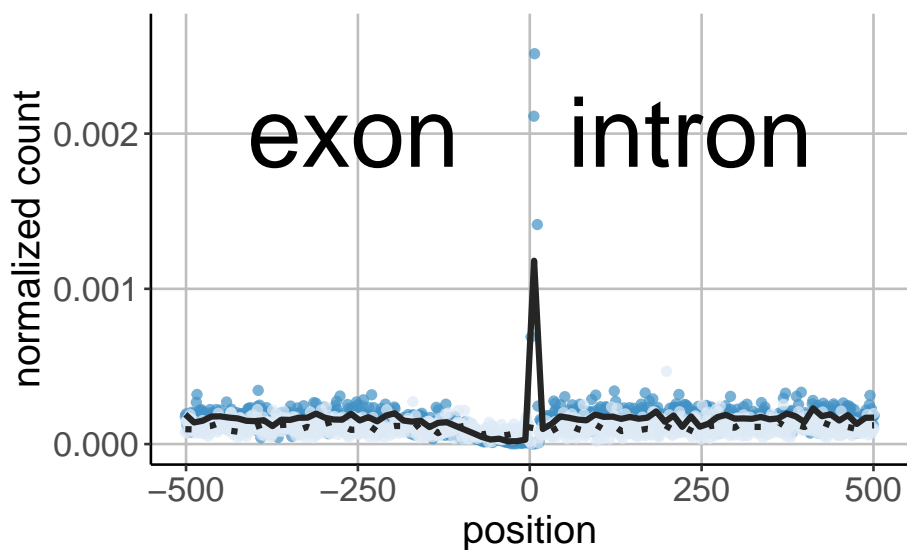

HNRNPA0-KUAGKUUUAGGK

•• antisense — sense    • antisense • sense

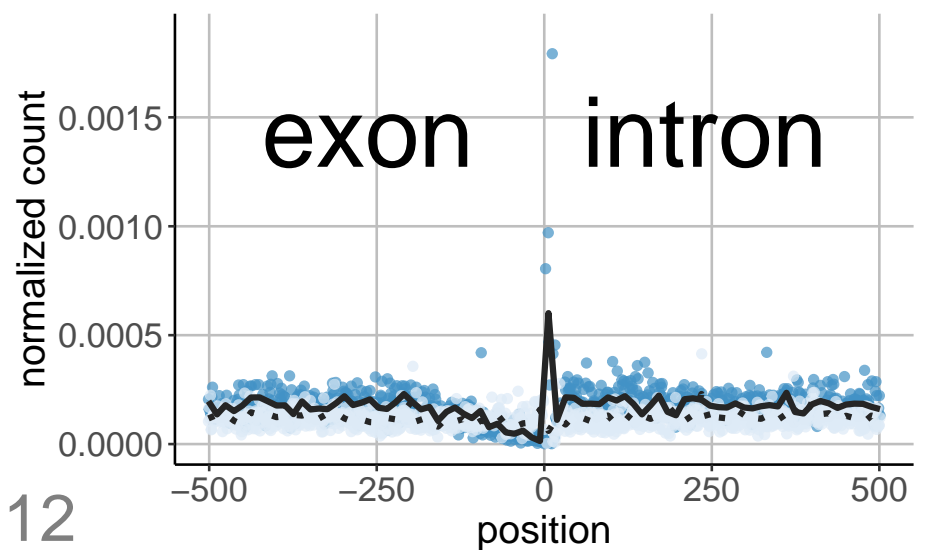

DONOR

SNRPA-CAUUGCACN

•• antisense — sense    • antisense • sense

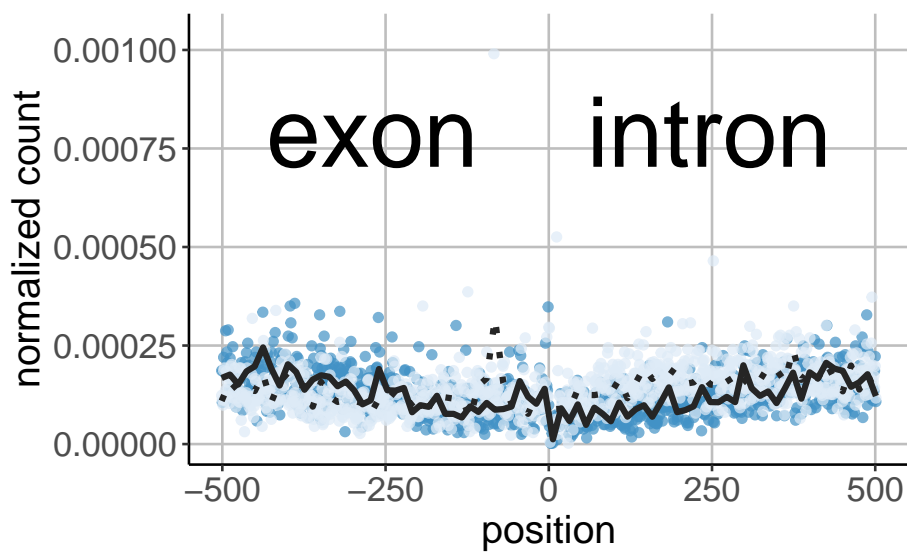

SNRPA-NUGCACR

•• antisense — sense    • antisense • sense

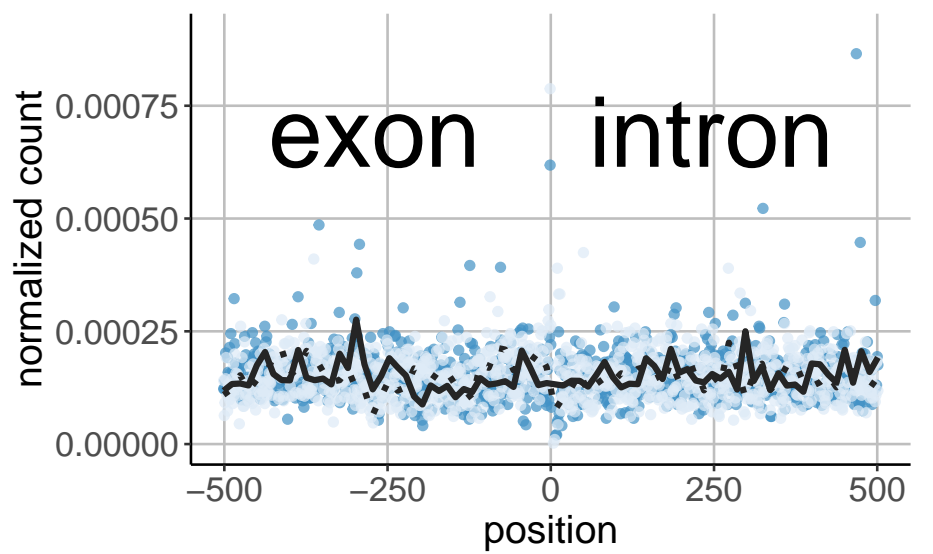

MEX3B\_3-UAGAGUUUUAU

•• antisense — sense    • antisense • sense

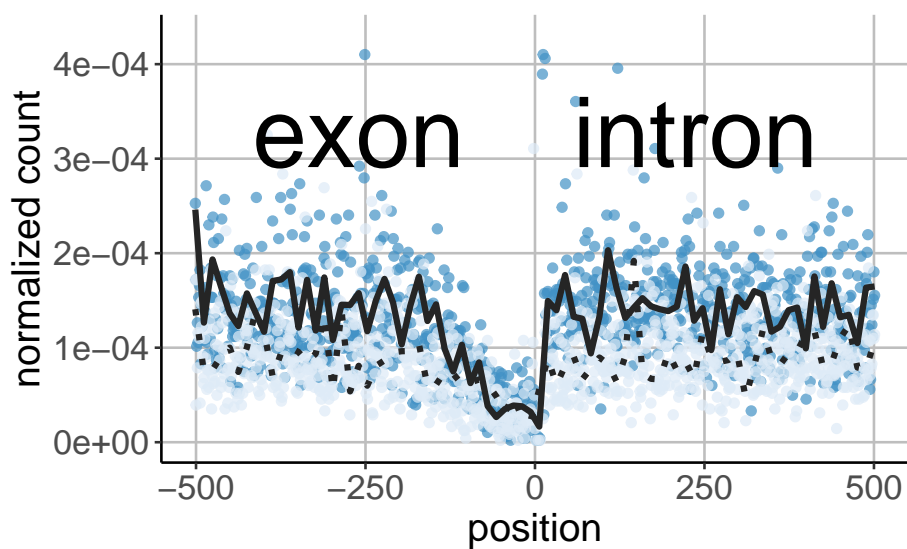

MEX3B\_3-UAUUUUAU

•• antisense — sense    • antisense • sense

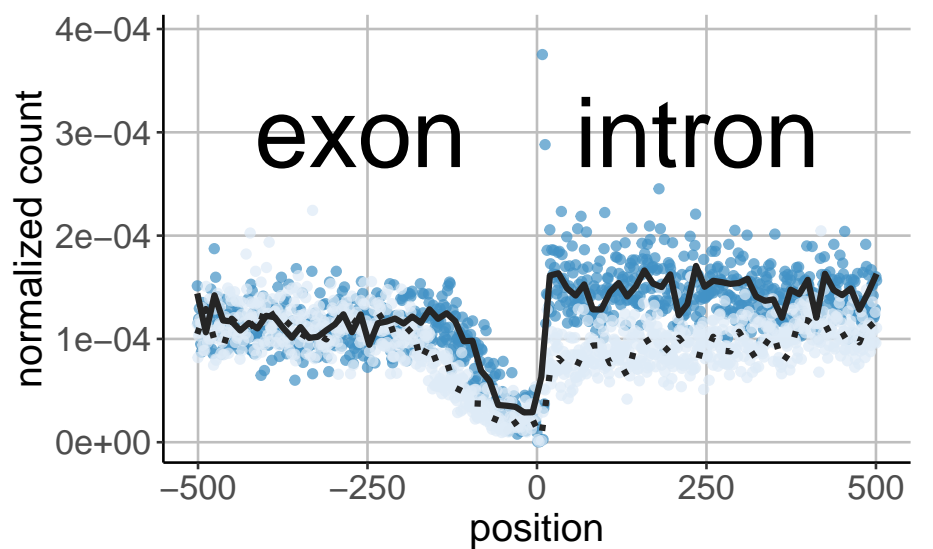

KHDRBS2-UAAACAAUAA

•• antisense — sense    • antisense • sense

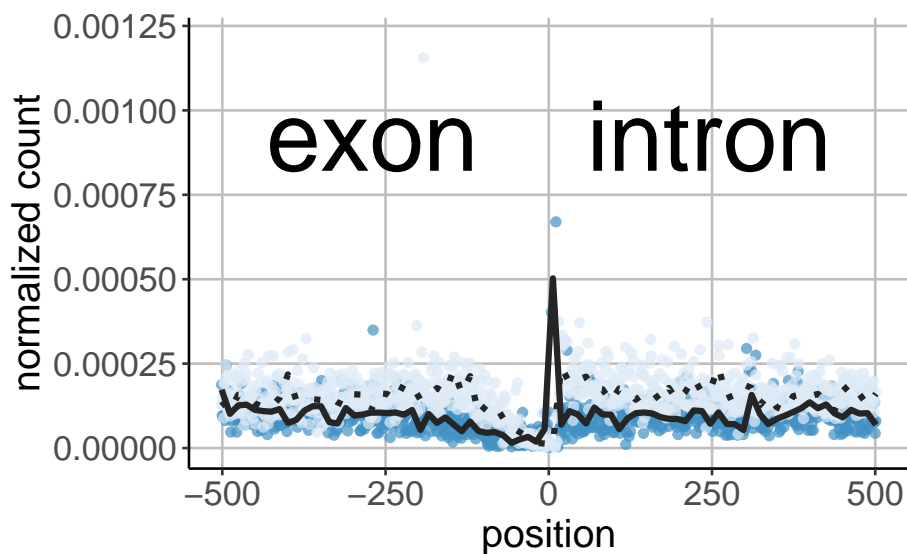

CELF3\_2-UGUGUNUGUGU

•• antisense — sense    • antisense • sense

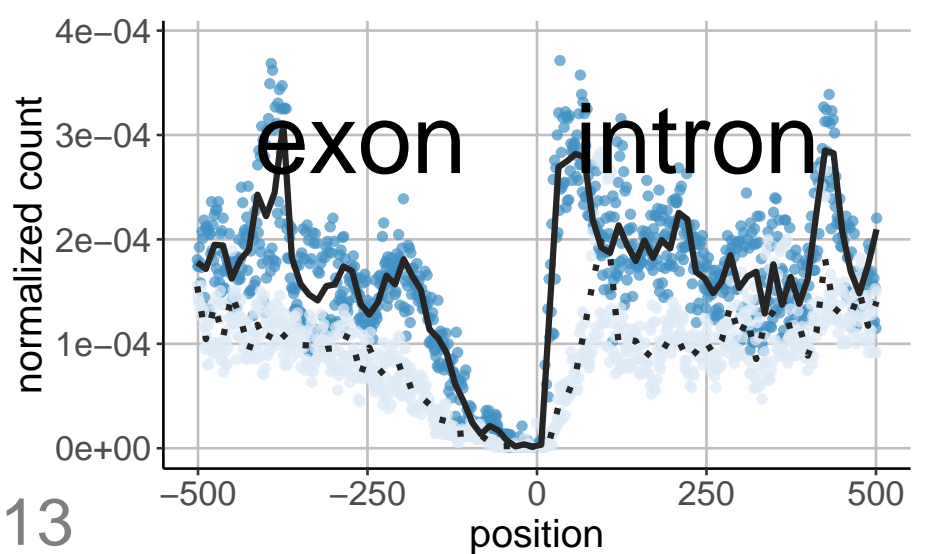

DONOR

RNPC3-GGGDDGGGDKUACKKGGK

•• antisense — sense    • antisense • sense

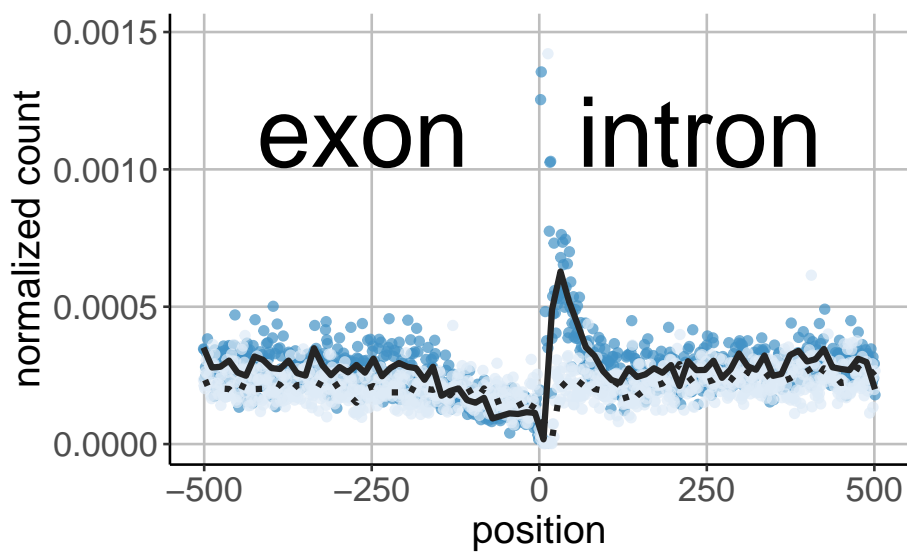

RBM14-UGCGUCG

•• antisense — sense    • antisense • sense

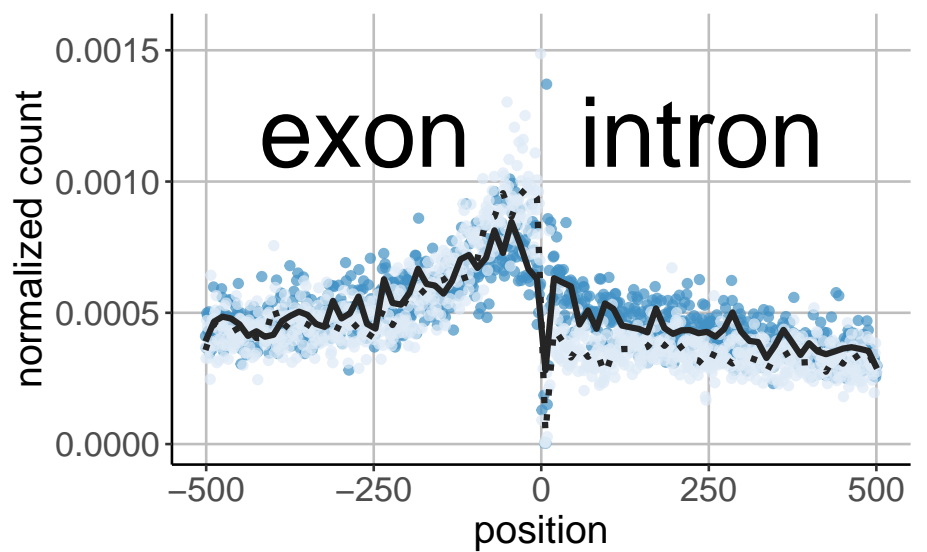

CELF4-UGUGUUGUGU

•• antisense — sense    • antisense • sense

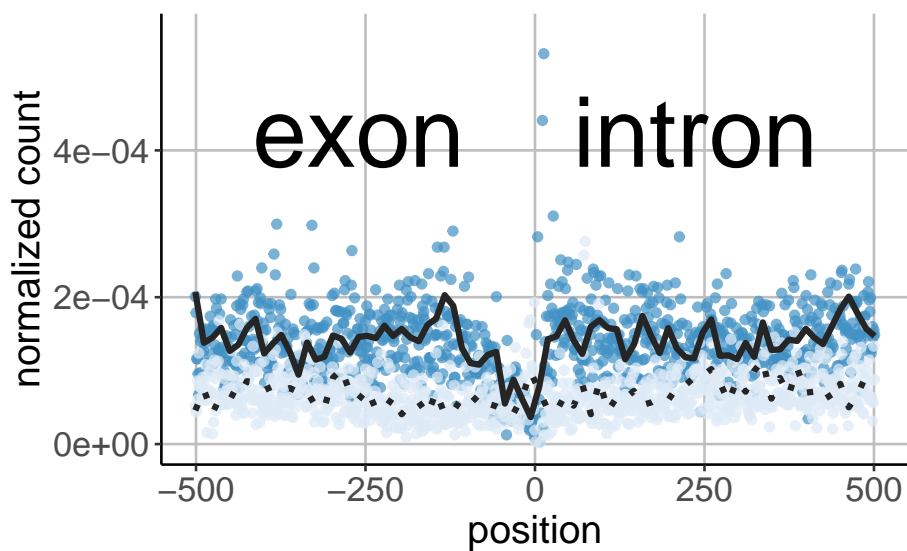

ZRANB2-NNNGGUAAGGUNN

•• antisense — sense    • antisense • sense

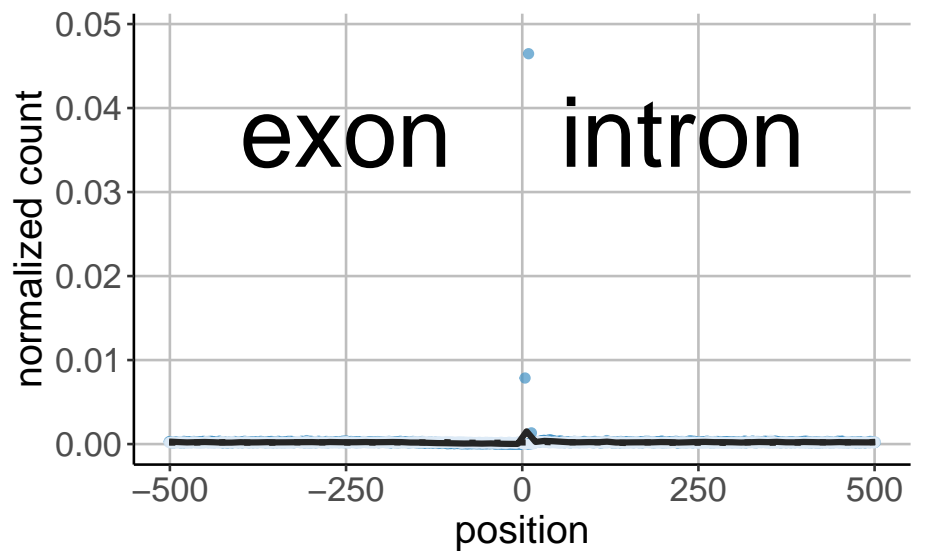

RBM4-CGGGGURUGN

•• antisense — sense    • antisense • sense

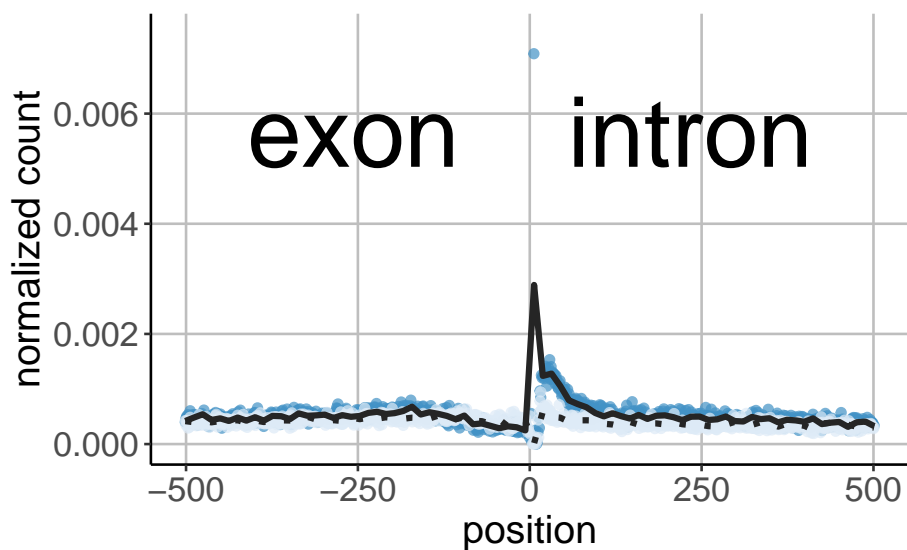

RBPMS-NAGGCACR

•• antisense — sense    • antisense • sense

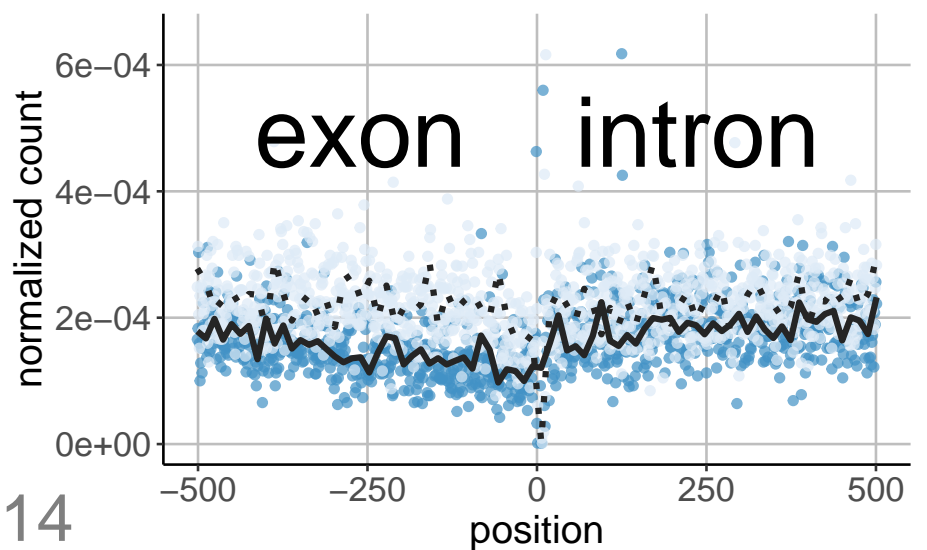

DONOR

RBPMS-UCACGNGCACN

•• antisense — sense    • antisense • sense

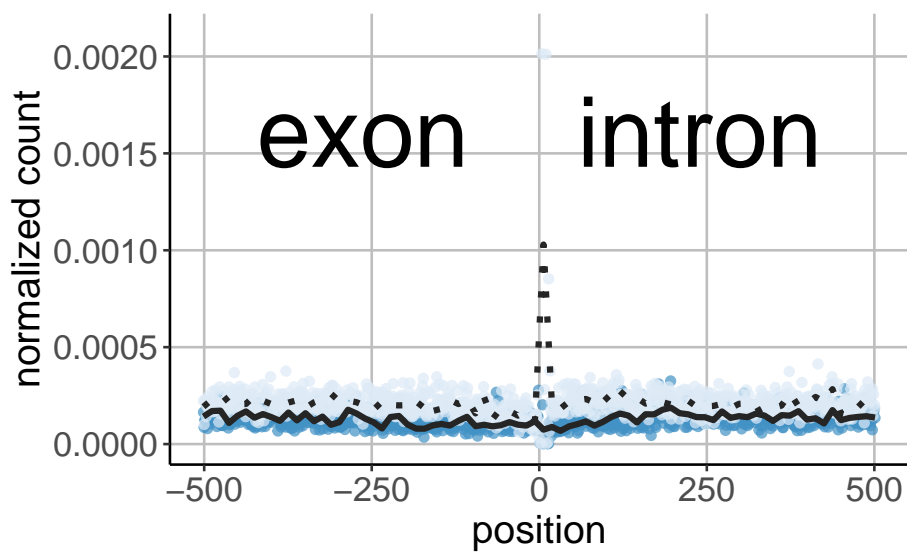

CELF1\_2-UGUGUNUGUGU

•• antisense — sense    • antisense • sense

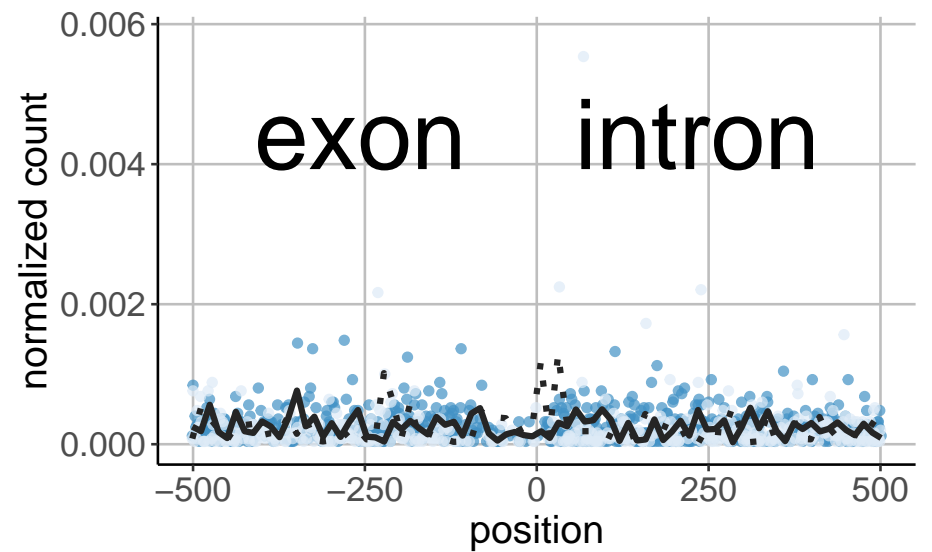

CSTF2-RRGGCGUAGCGUNN

•• antisense — sense    • antisense • sense

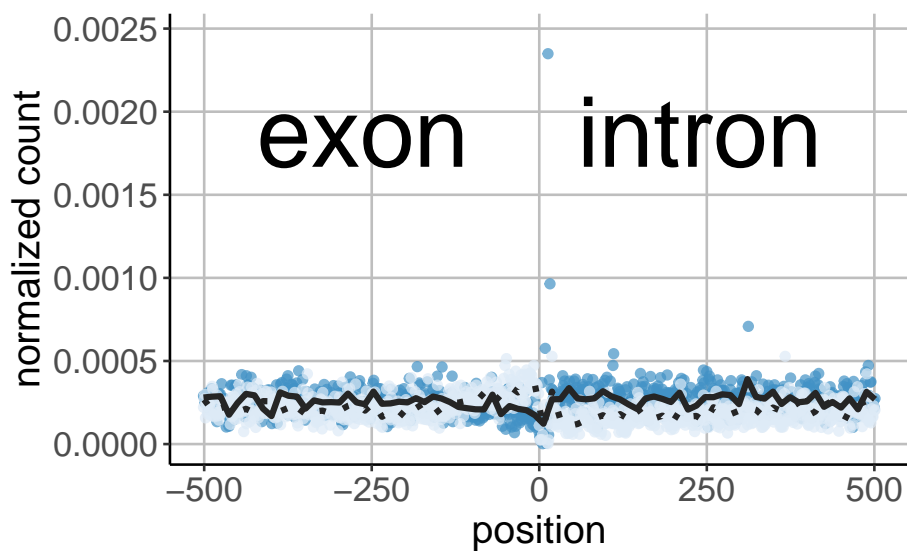

RBM28-GRGGCCGNGCGGUGG

•• antisense — sense    • antisense • sense

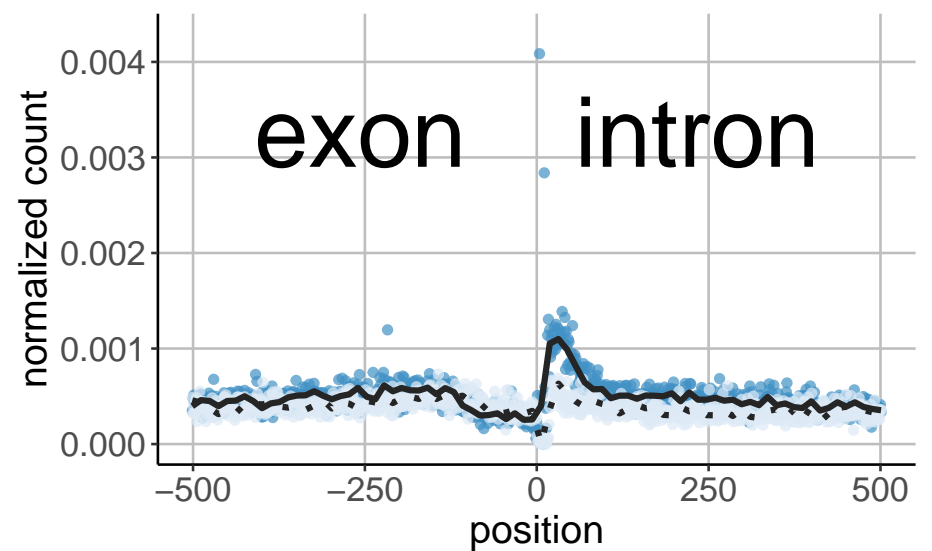

RBM28-GUGGGUCUCGG

•• antisense — sense    • antisense • sense

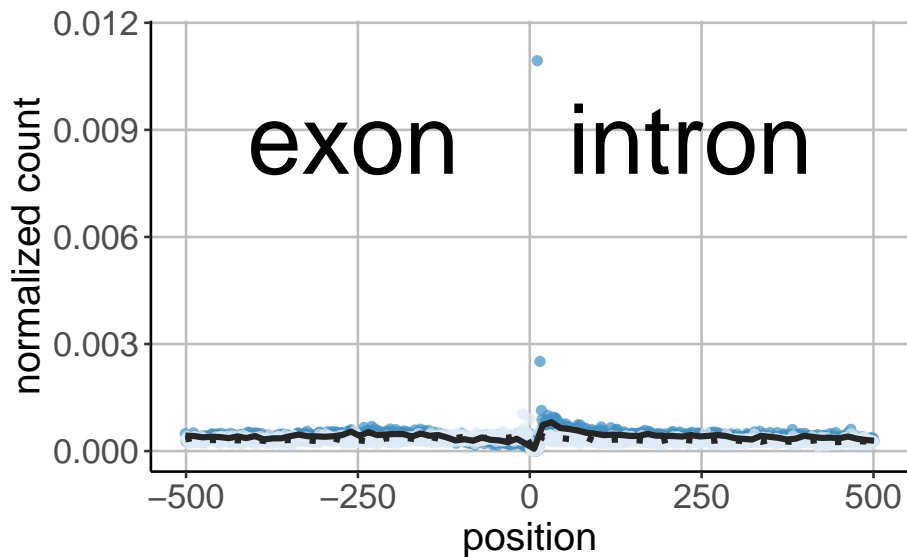

ZC3H10-GCGCAUGCGNN

•• antisense — sense    • antisense • sense

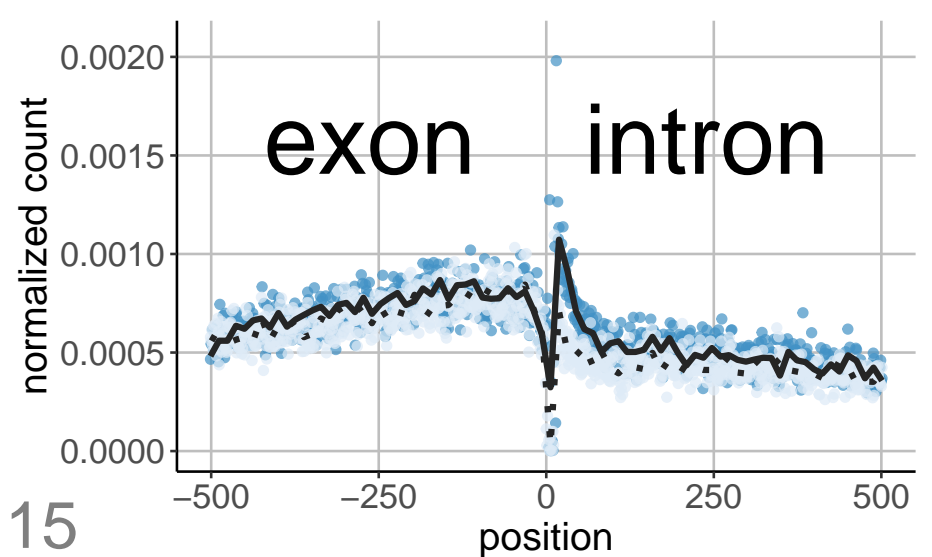



DONOR

ZC3H10-NGCGCAGCGUN

• antisense — sense    • antisense • sense

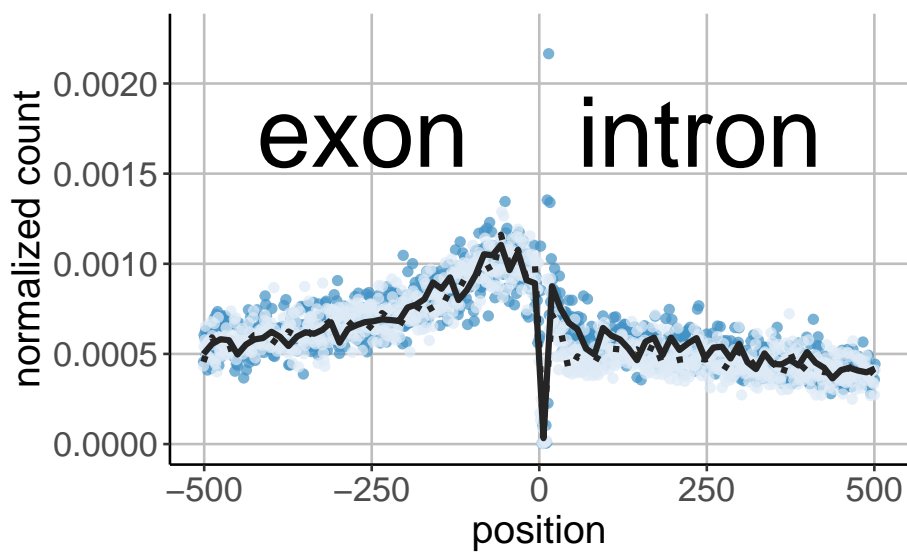

RBFOX1\_2-GCAUGNNGCAUG

• antisense — sense    • antisense • sense

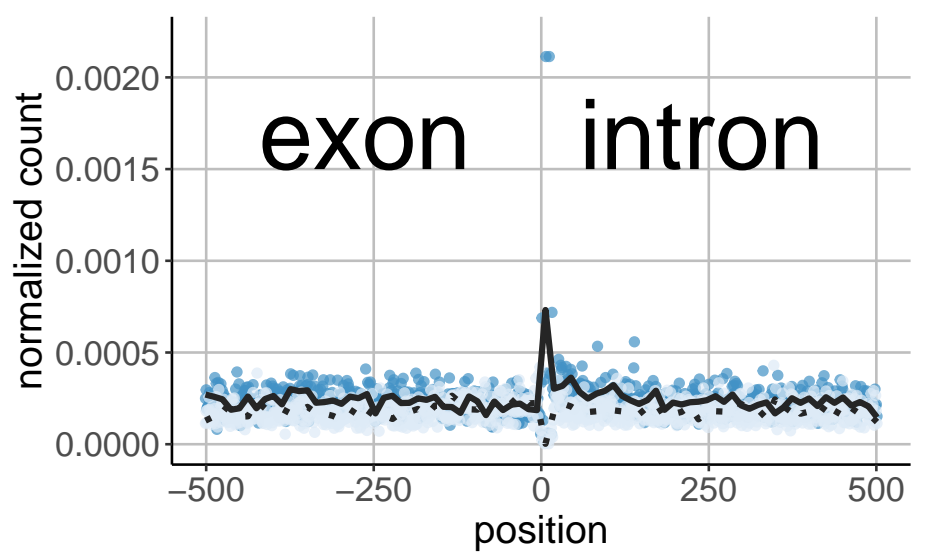

MSI1-KUAGUWKUAGK

• antisense — sense    • antisense • sense

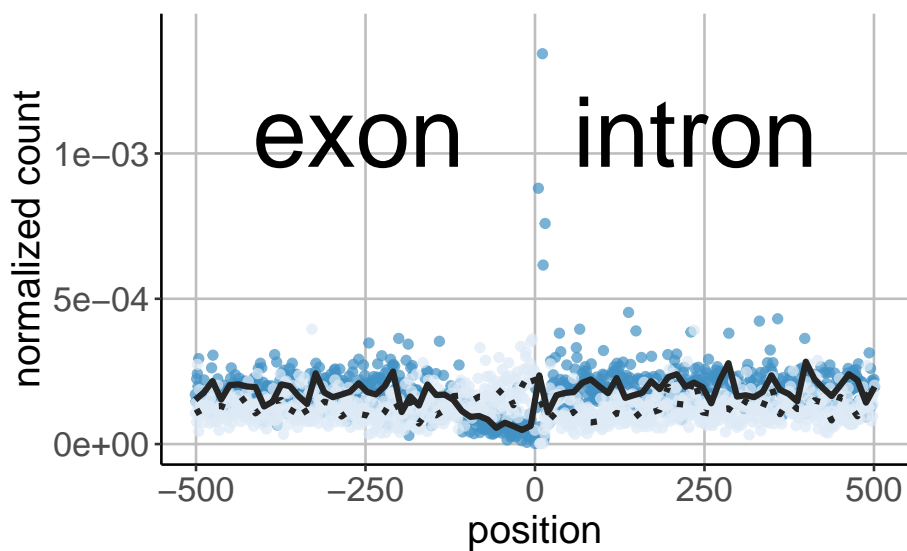

HEXIM1-GKDKCGACGGK

• antisense — sense    • antisense • sense

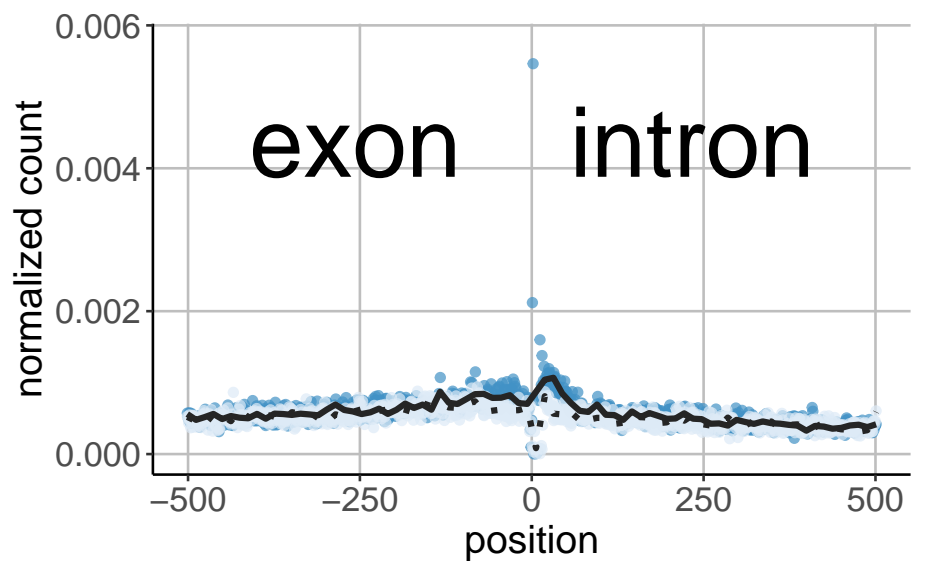

SART3-NGUUAGCRK

• antisense — sense    • antisense • sense

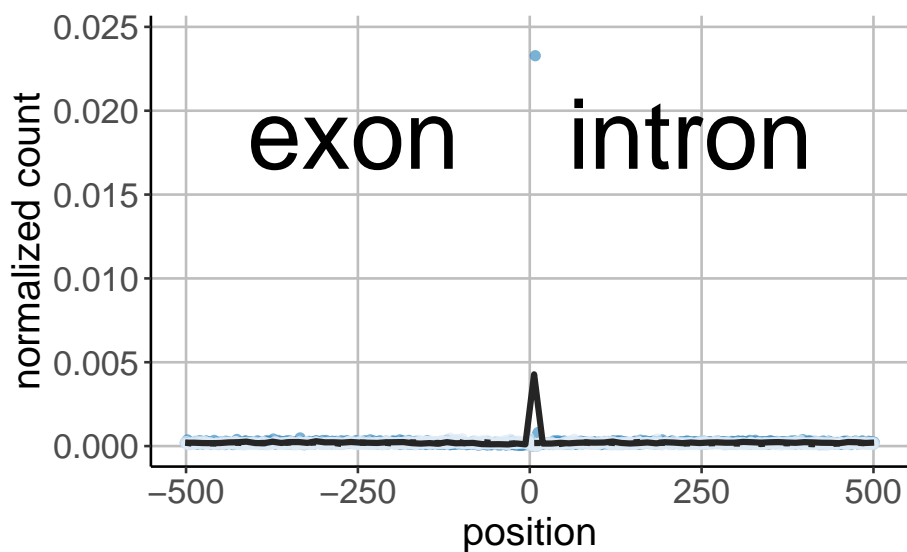

MSI2-GUAGUGDGUAGK

• antisense — sense    • antisense • sense

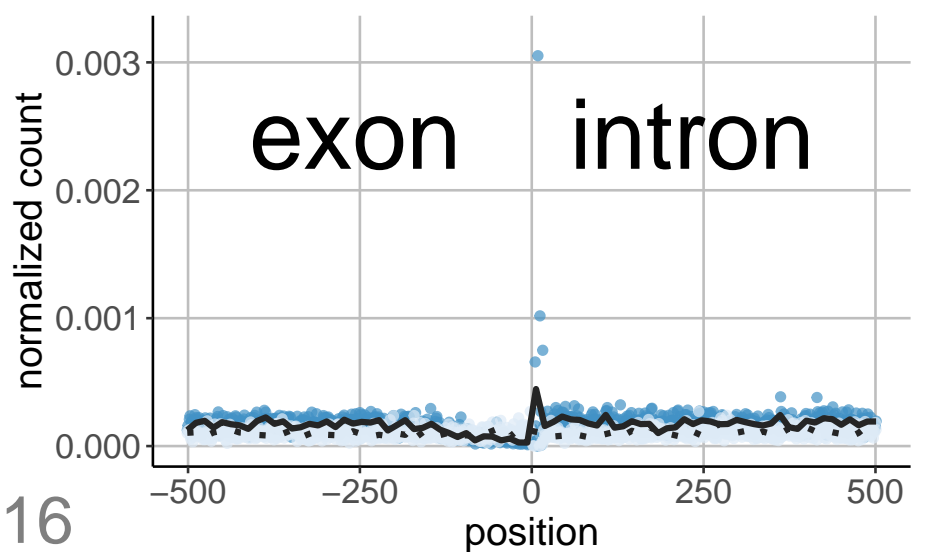

DONOR

MSI2-GUAGUNNNGUAGK

• antisense — sense    • antisense • sense

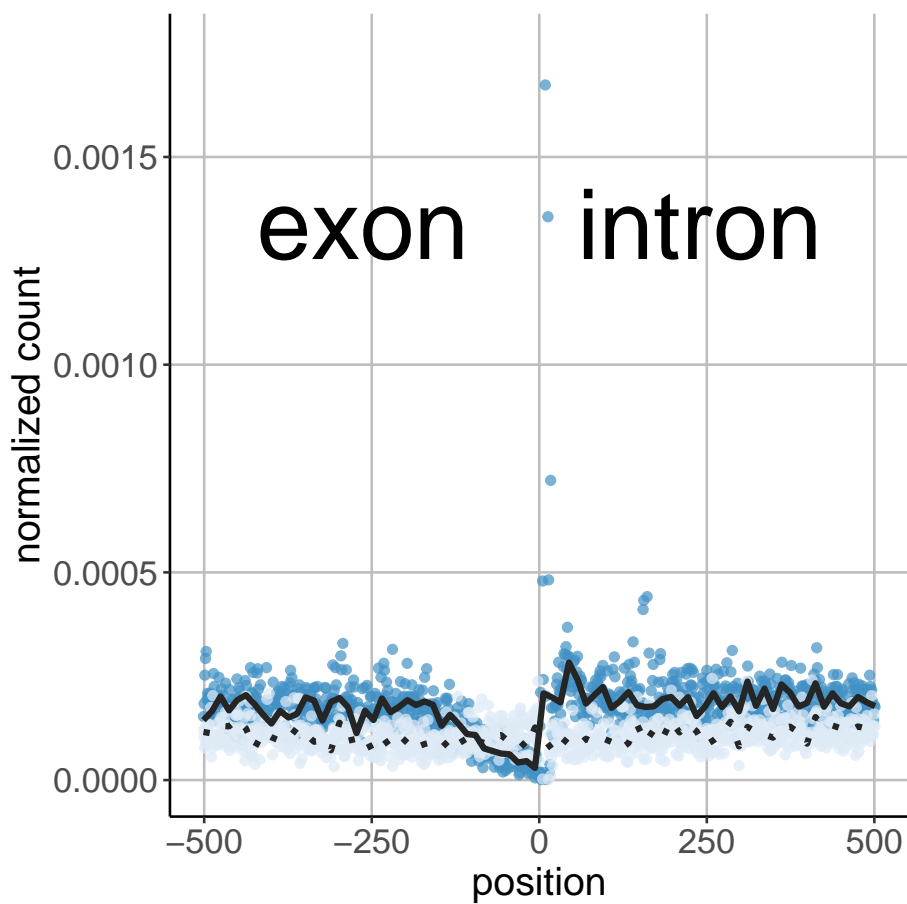

ZCRB1-GNNUUAAKK

• antisense — sense    • antisense • sense

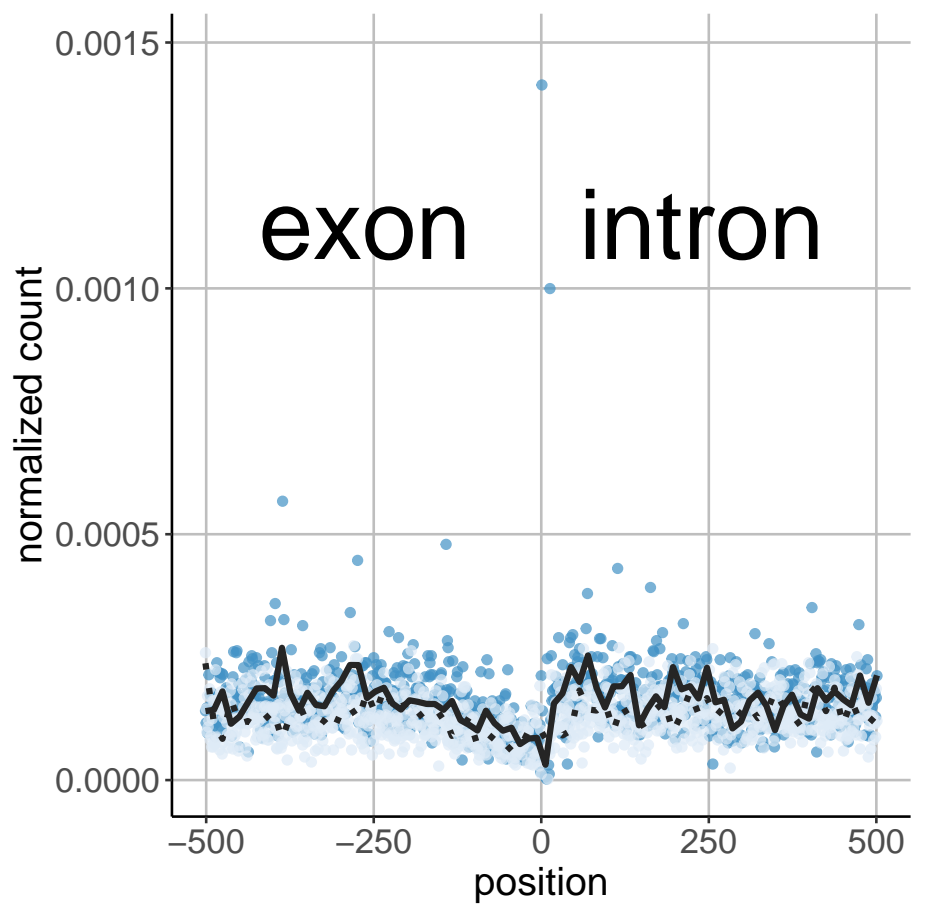

ZCRB1-GUGGACUUA

• antisense — sense    • antisense • sense

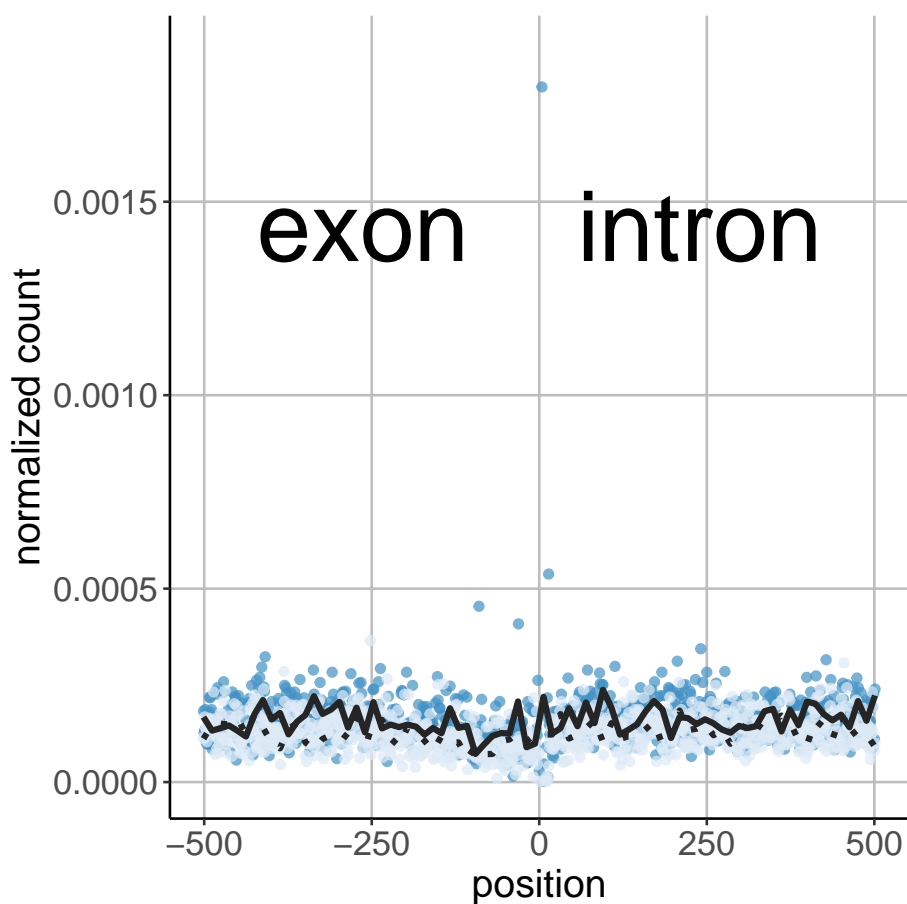

LARP6-GUGUCNNNNNNNNGAAGUCN

• antisense — sense    • antisense • sense

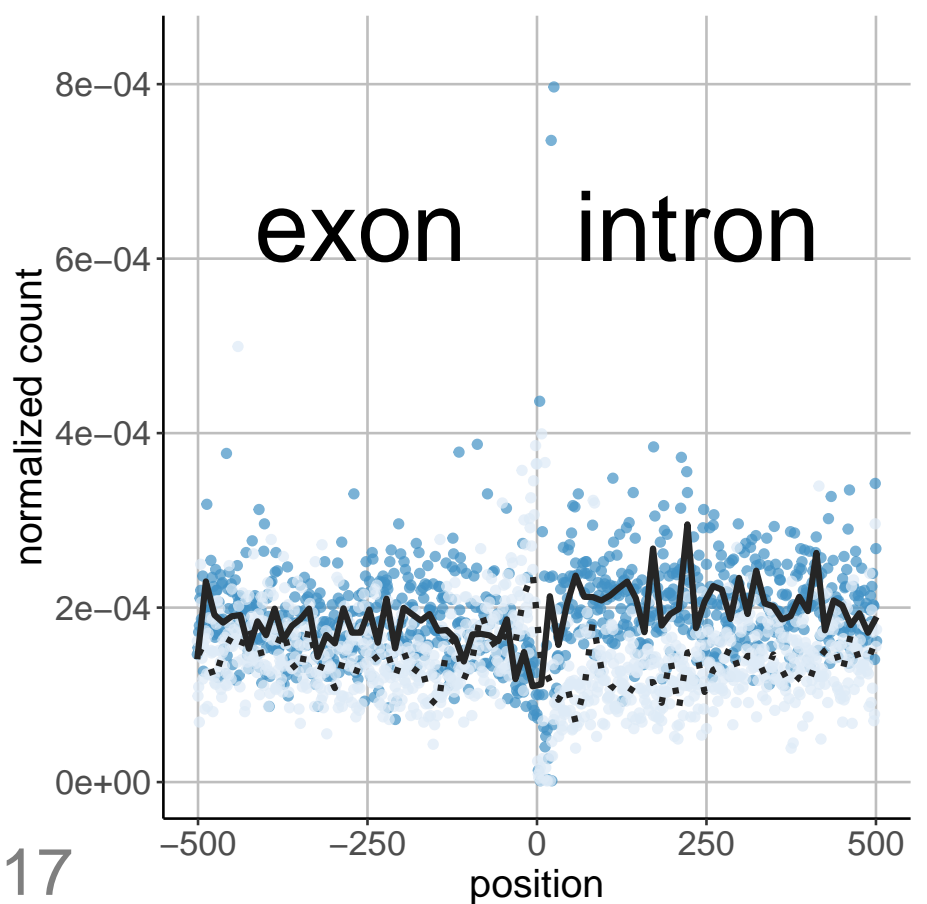

**DONOR**

DAZ1\_2-NNUGUGUGSGUUUCCGSN

•• antisense — sense    • antisense • sense

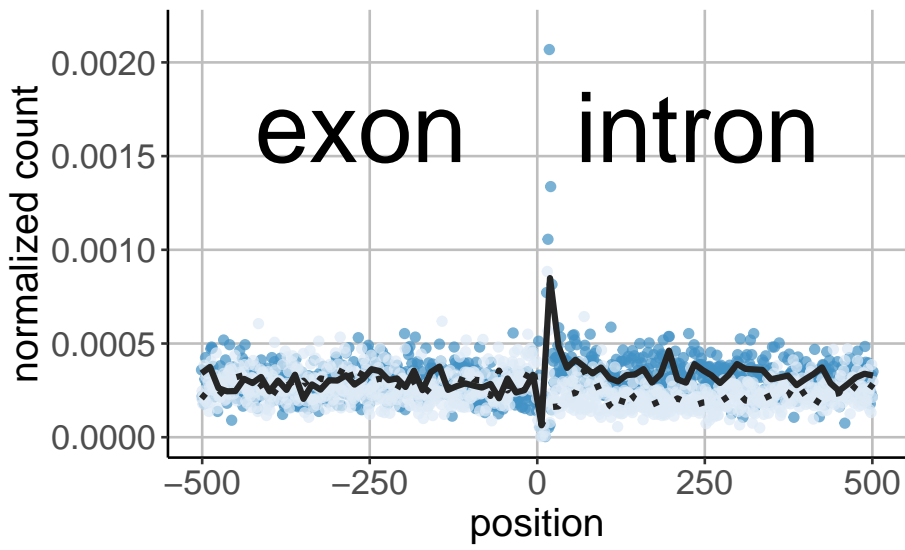

DAZ1\_2-NUGKUGUUGUAGN

•• antisense — sense    • antisense • sense

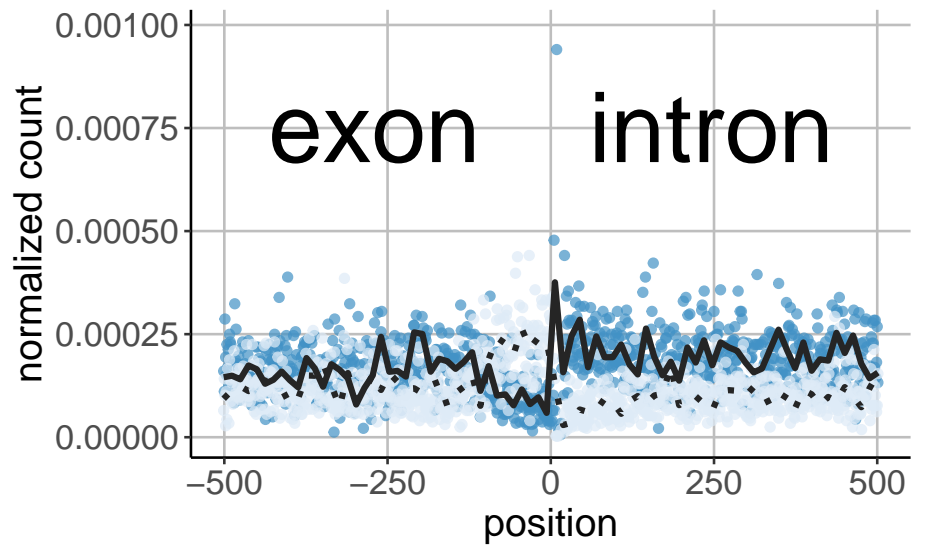

DAZ1\_2-CRNAAUGUUAGUAGN

•• antisense — sense    • antisense • sense

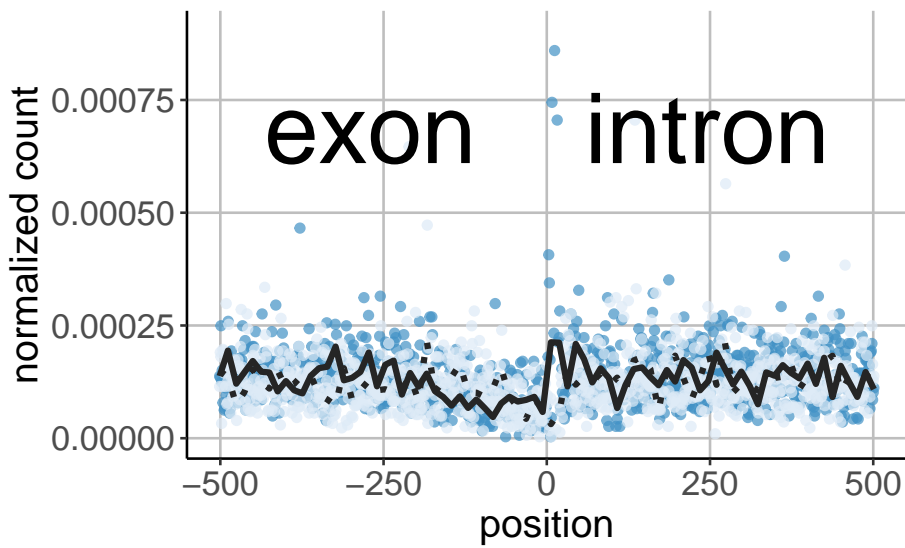

DAZ3-NNUGUGUGSGUUUCCGSN

•• antisense — sense    • antisense • sense

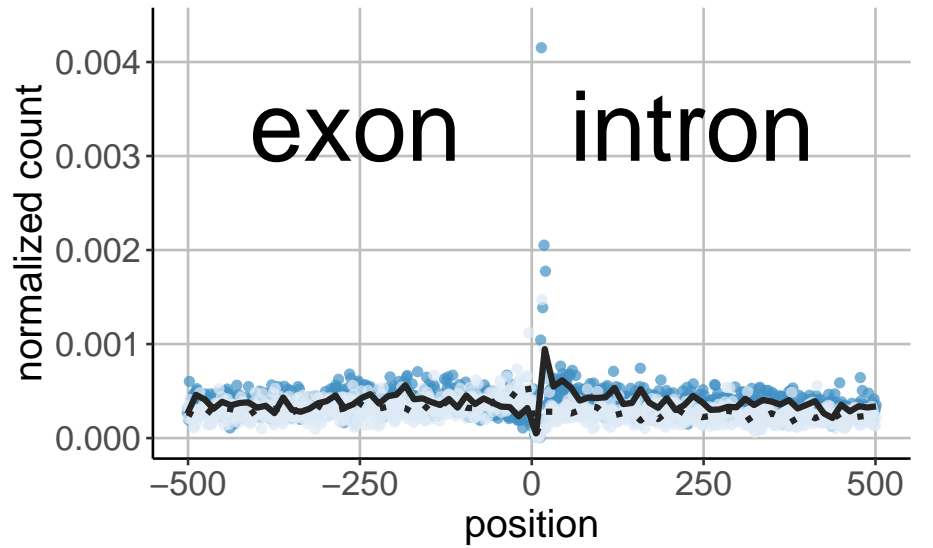

DAZ4-NNUGUGUGSGUUUCCGSN

•• antisense — sense    • antisense • sense

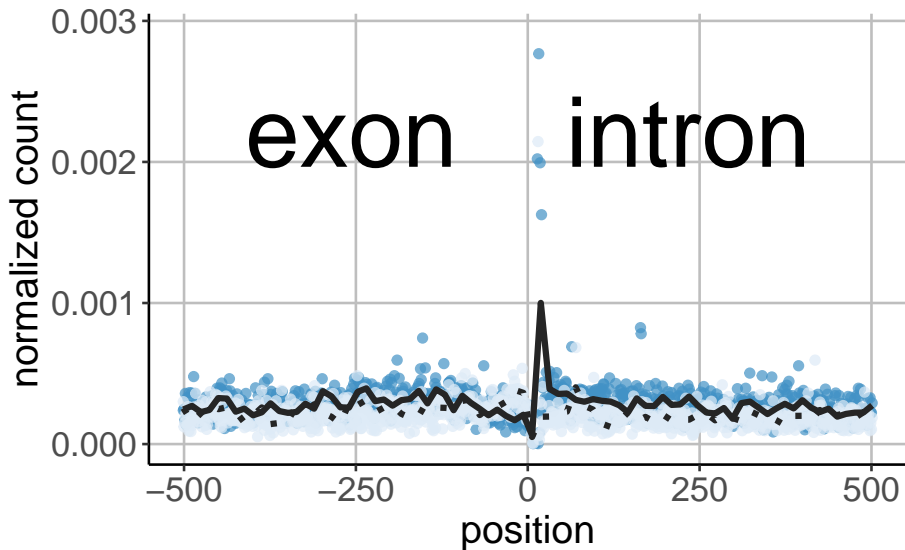

DAZ4-CUGKUGUUGUAGG

•• antisense — sense    • antisense • sense

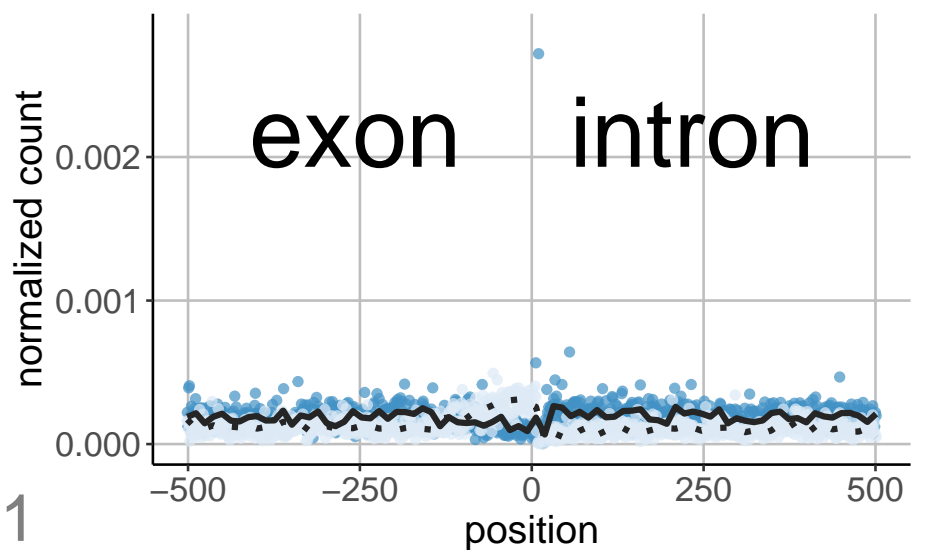

**DONOR**

DAZL-NNUGYGUGCGUUUCCGSN

•• antisense — sense    • antisense • sense

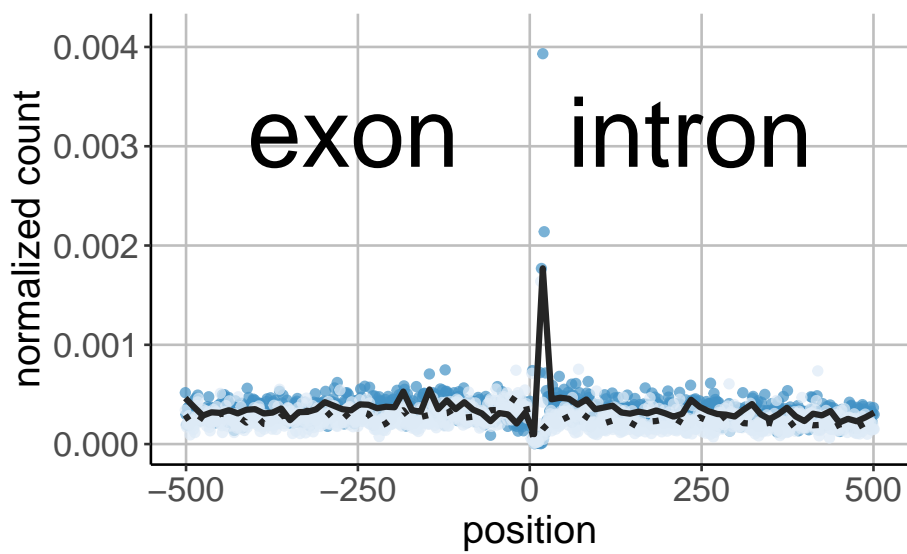

HNRNPA1-NGCAGUUUUAGGGCN

•• antisense — sense    • antisense • sense

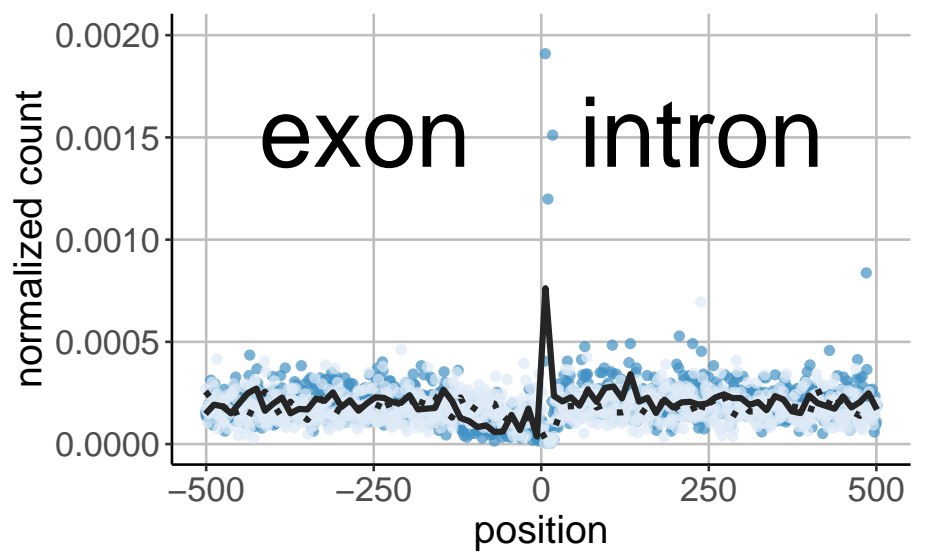

HNRNPC-NGGGUCUNAUUUUUAAN

•• antisense — sense    • antisense • sense

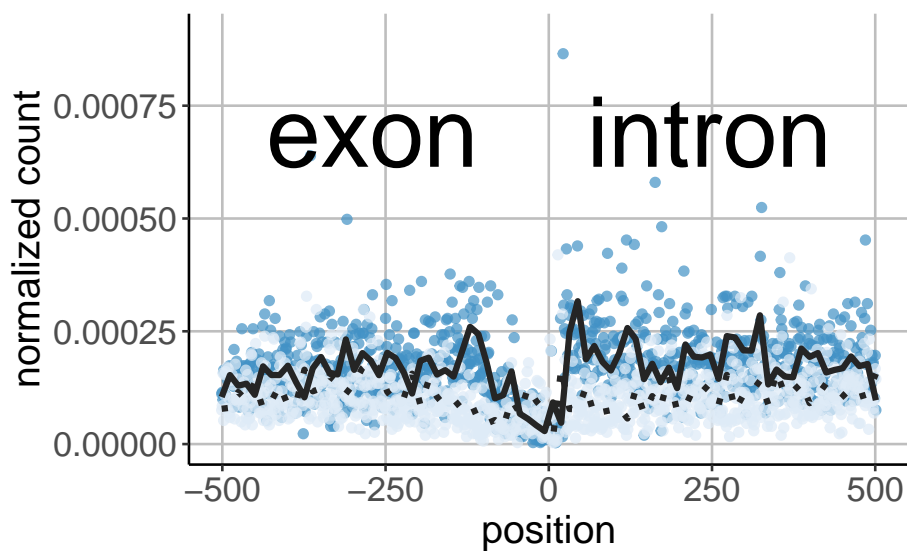

HNRNPCL1-NGGGUCUNAUUUUUAAN

•• antisense — sense    • antisense • sense

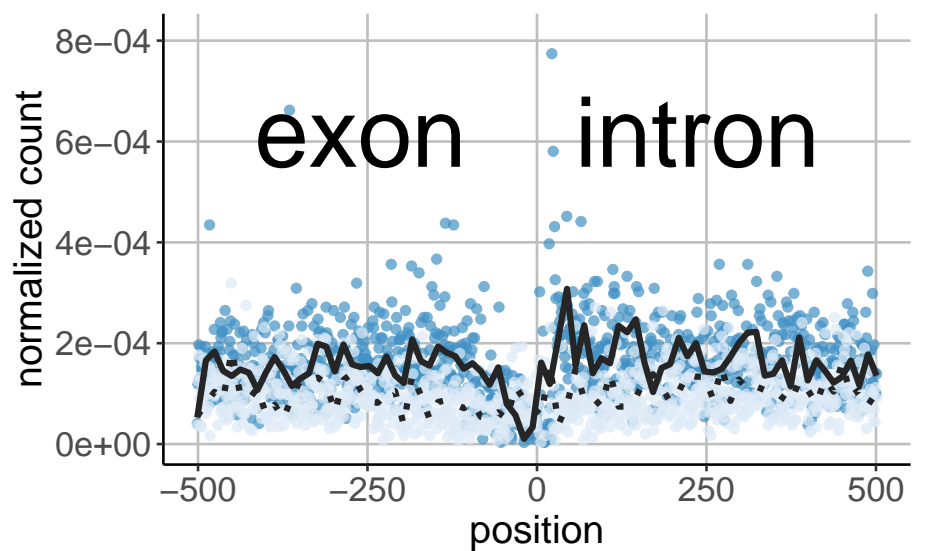

MKRN1-NYGUAAAKUGUAGN

•• antisense — sense    • antisense • sense

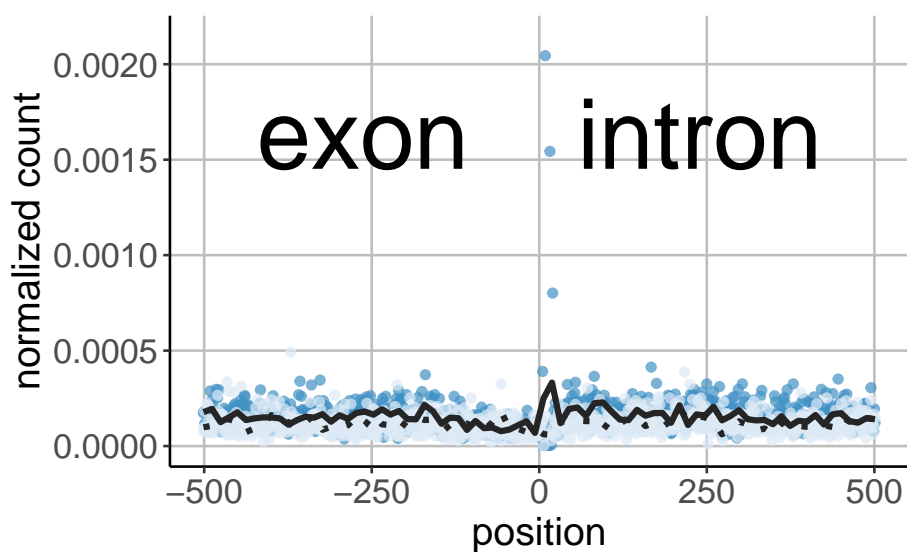

RALY-GGGUCUWUUUUUAA

•• antisense — sense    • antisense • sense

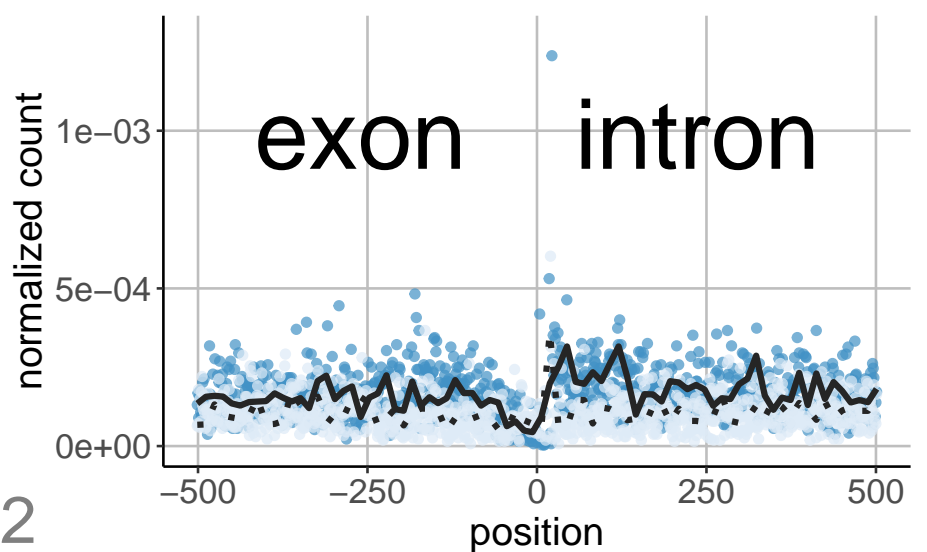

2

DONOR

RBFOX1\_4-GKUGCAUGUG

•• antisense — sense    • antisense • sense

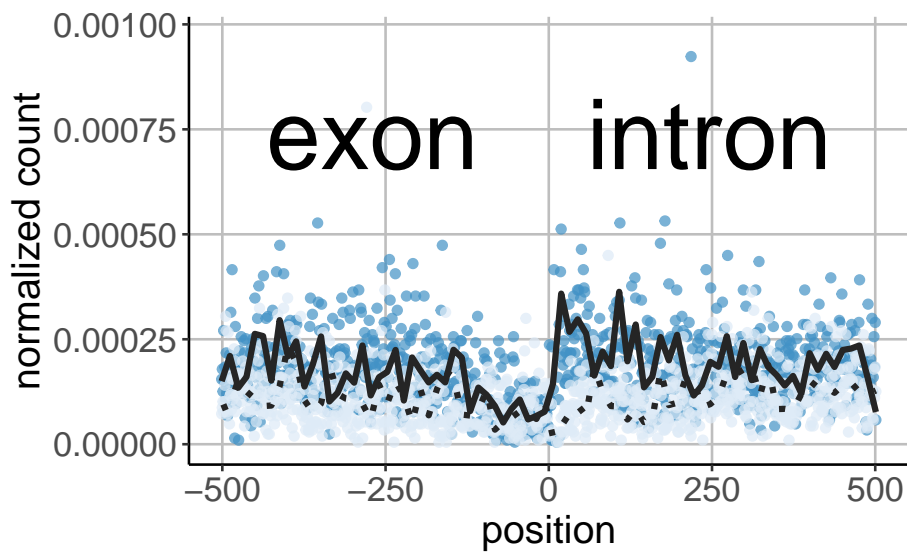

RBFOX3-GUWGCAUGUG

•• antisense — sense    • antisense • sense

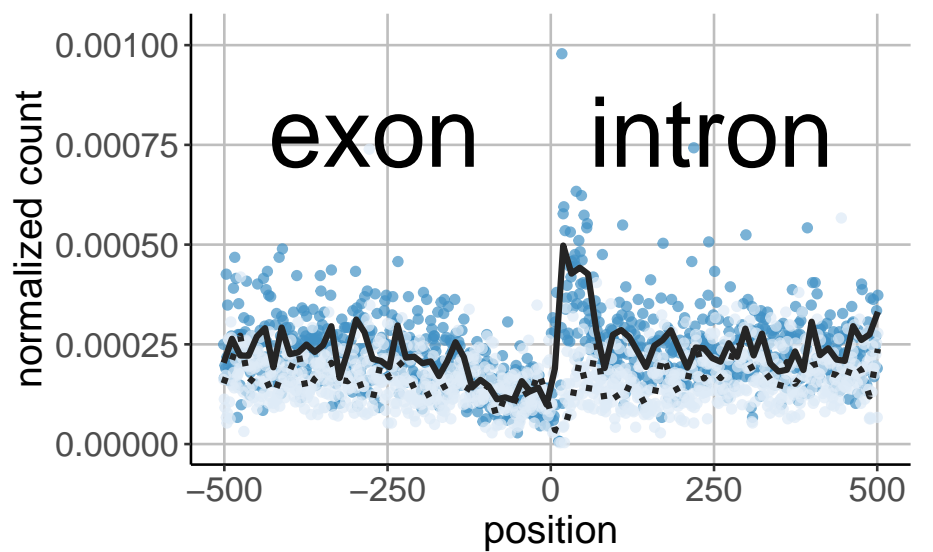

RBM4-KGUUGCGCGGG

•• antisense — sense    • antisense • sense

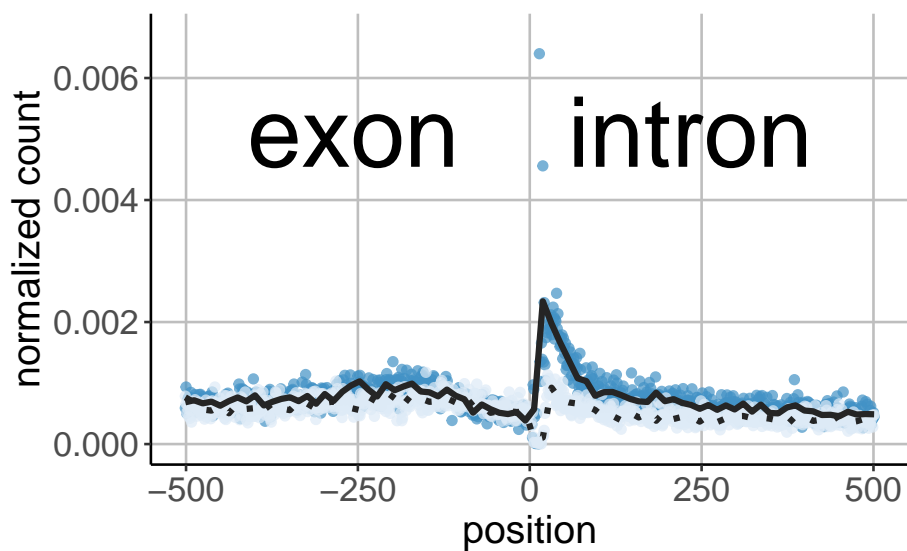

RBM4-UGAGUGCGGUAG

•• antisense — sense    • antisense • sense

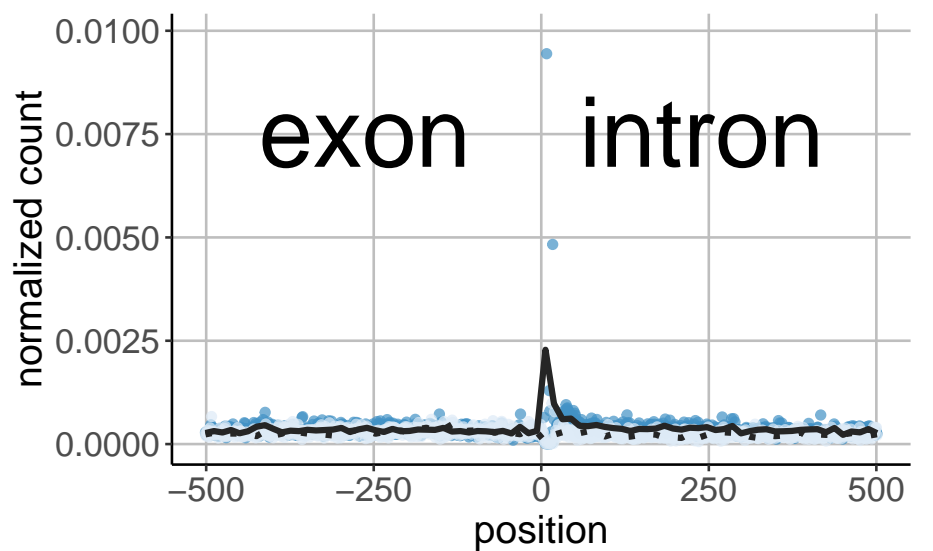

RBM4B-KGUUGCGCGGG

•• antisense — sense    • antisense • sense

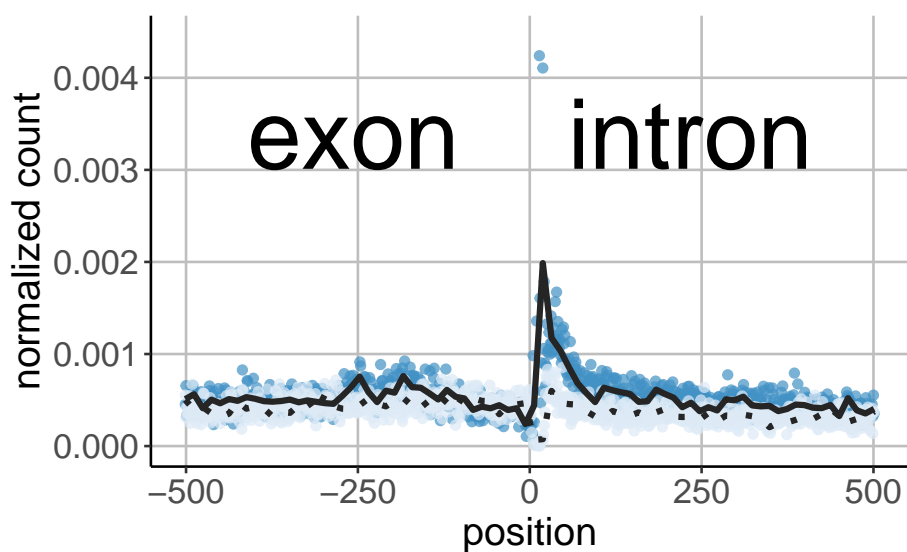

RBM4B-UGAGUGCGGUAG

•• antisense — sense    • antisense • sense

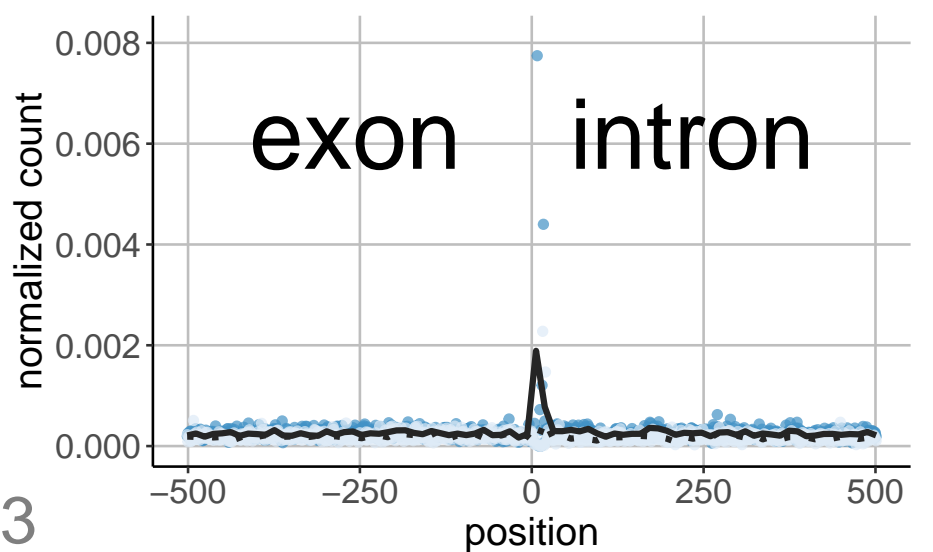

3

DONOR

RBM6-YRCGCUCCUNGCY

•• antisense — sense    • antisense • sense

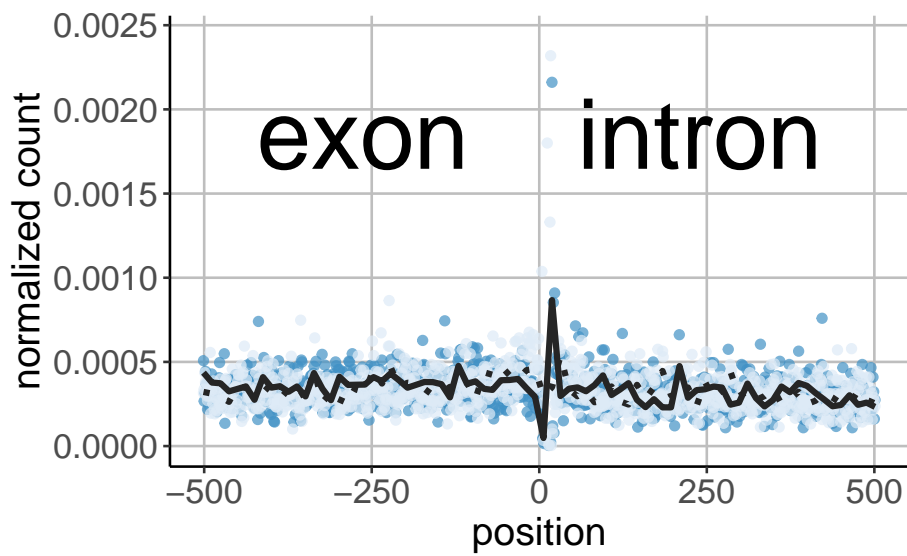

RBM6-YRYGCUCGUGGCYN

•• antisense — sense    • antisense • sense

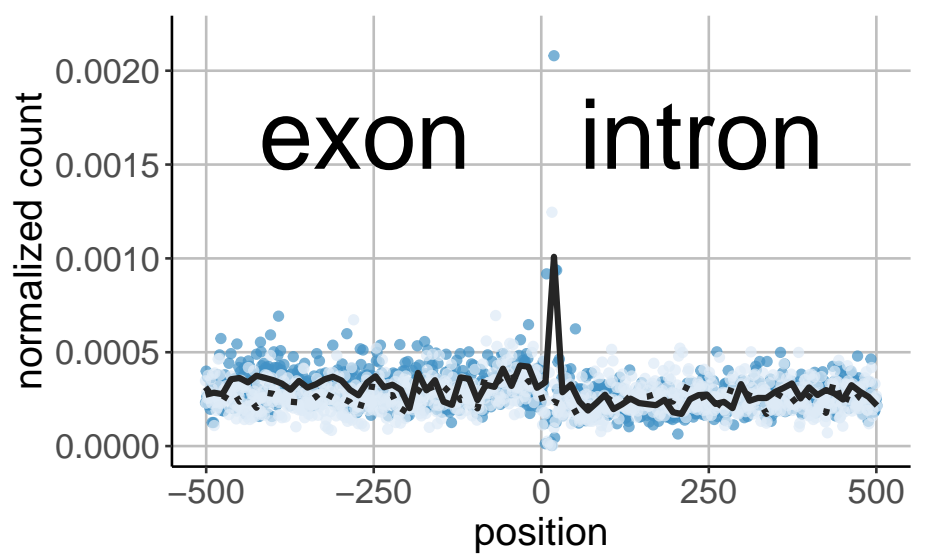

RBMS1-SGUGCAUAAKGCN

•• antisense — sense    • antisense • sense

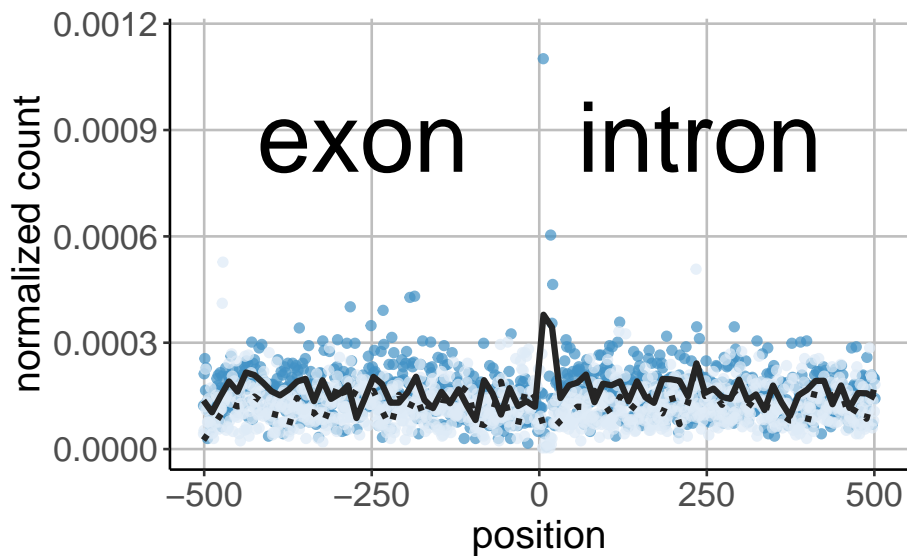

RBMS2-NUGCAUAAUGN

•• antisense — sense    • antisense • sense

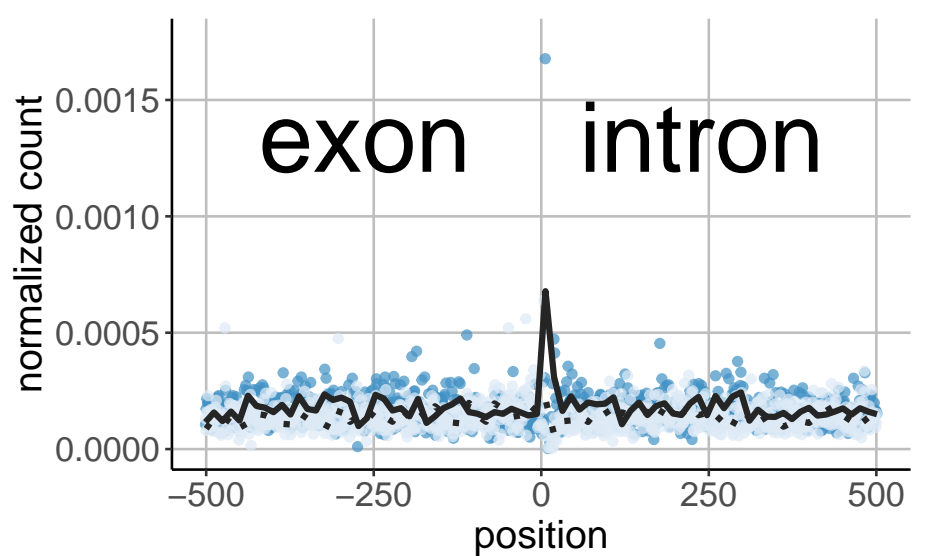

RBMS3-NUGCAUAAUGN

•• antisense — sense    • antisense • sense

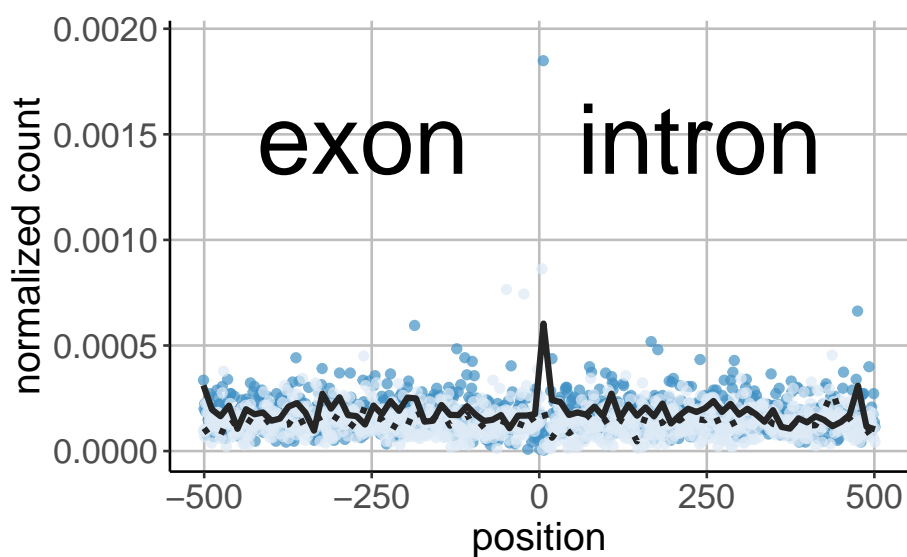

RBMS3-SAUGYAUAAKUG

•• antisense — sense    • antisense • sense

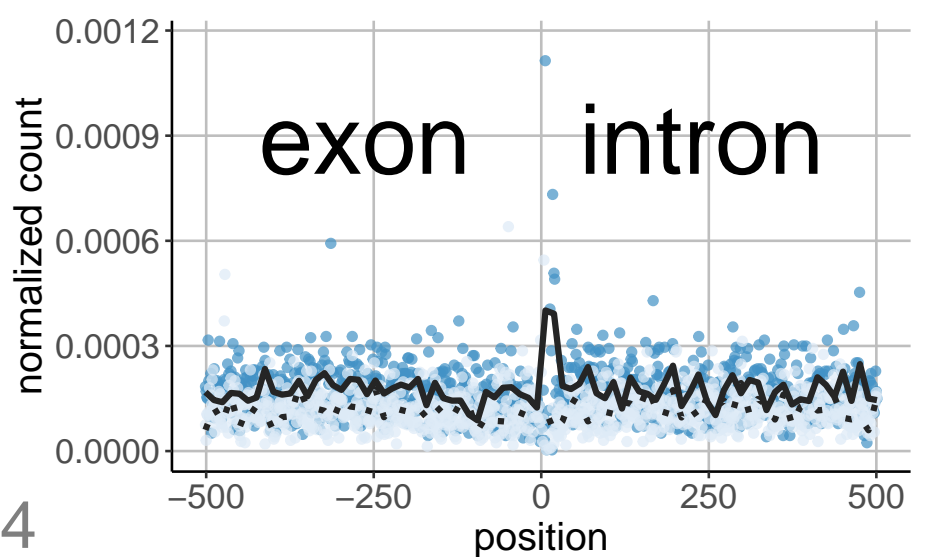

4

DONOR

RBM1E-NGCUUCGNGCN

•• antisense — sense    • antisense • sense

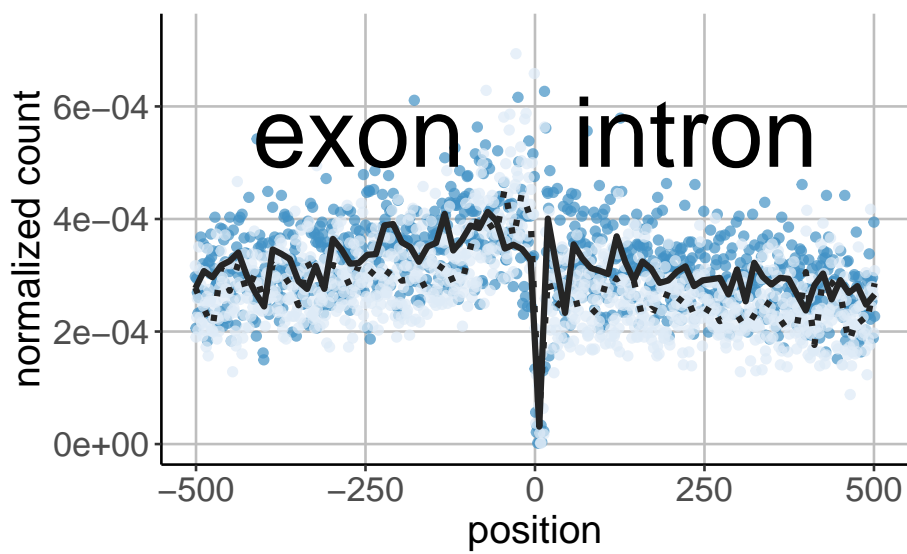

RBM1E-NAGCUUNGUGCUN

•• antisense — sense    • antisense • sense

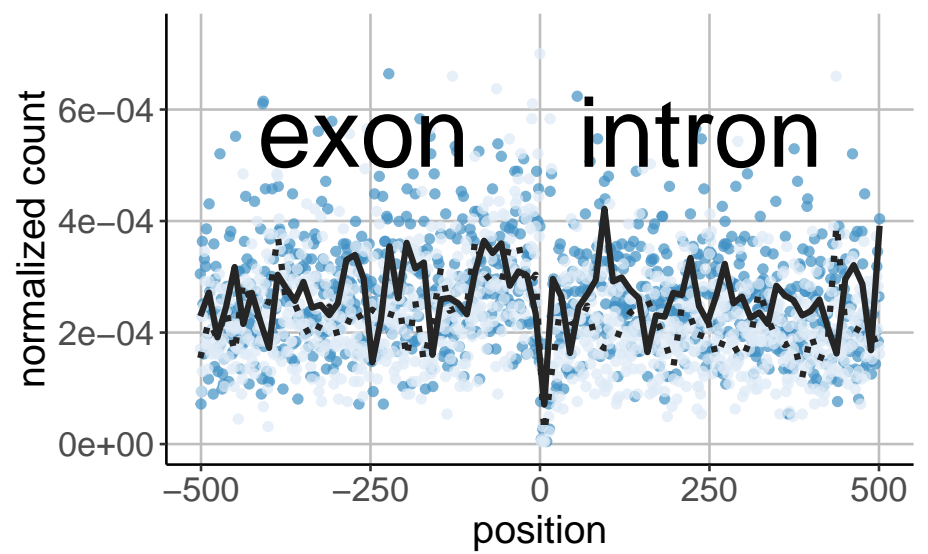

RBM1F-NGCCUCAAGGYN

•• antisense — sense    • antisense • sense

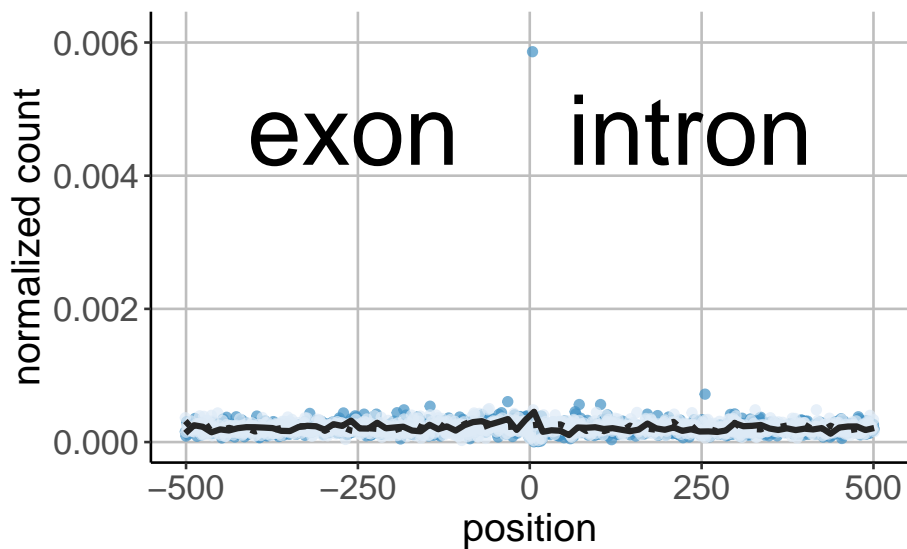

RBM1F-GCGCAAGAGC

•• antisense — sense    • antisense • sense

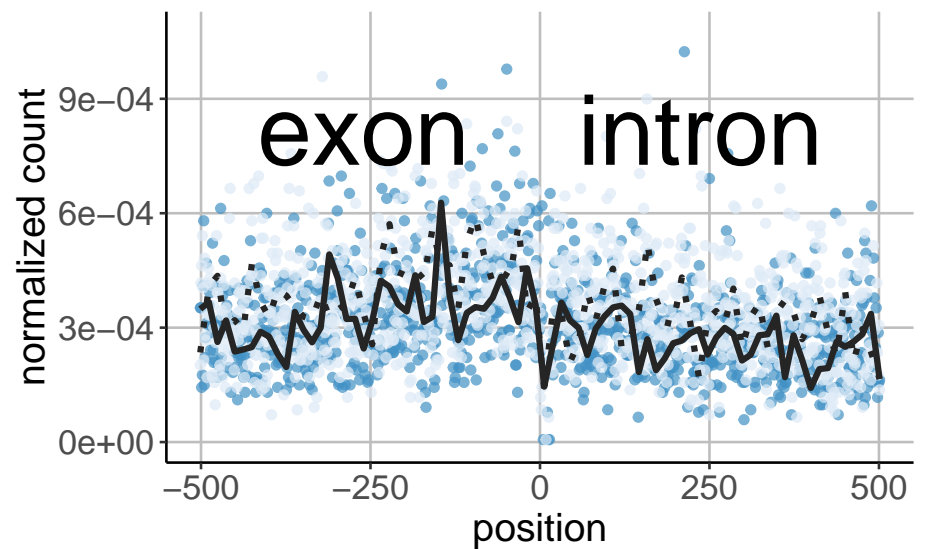

RBM1J-NGCCUCAAGGYN

•• antisense — sense    • antisense • sense

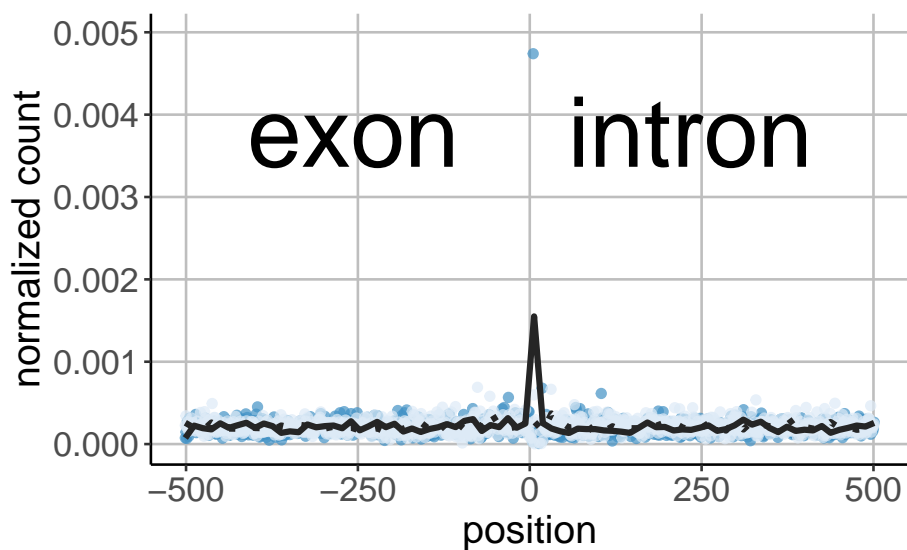

RBM1J-GCGCAAGAGC

•• antisense — sense    • antisense • sense

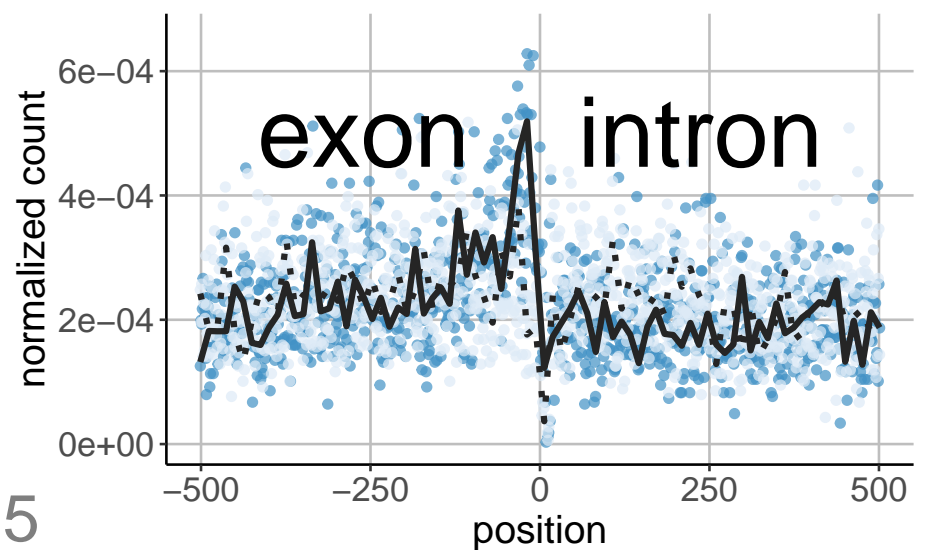

5

DONOR

RBM1J-NGCGUCGUGGCN

•• antisense — sense    • antisense • sense

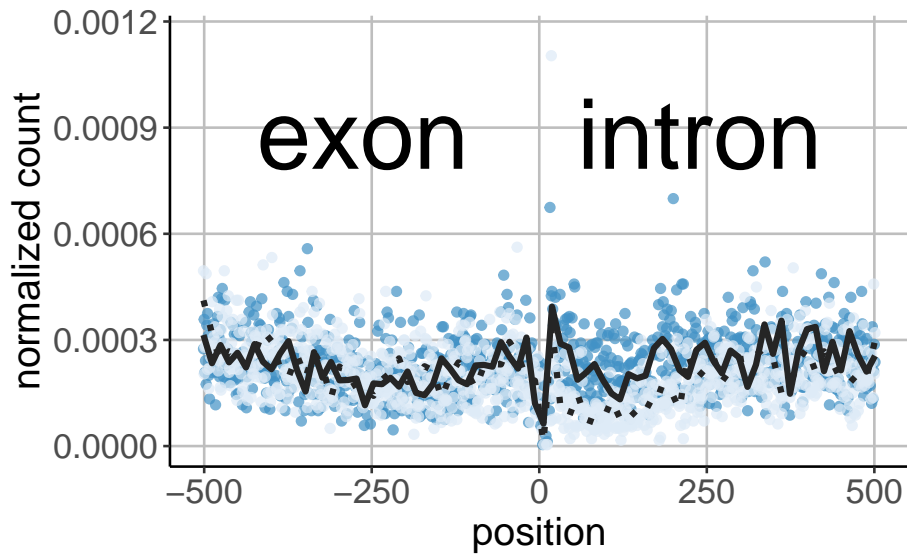

RBM1J-UGAAUUCGUCN

•• antisense — sense    • antisense • sense

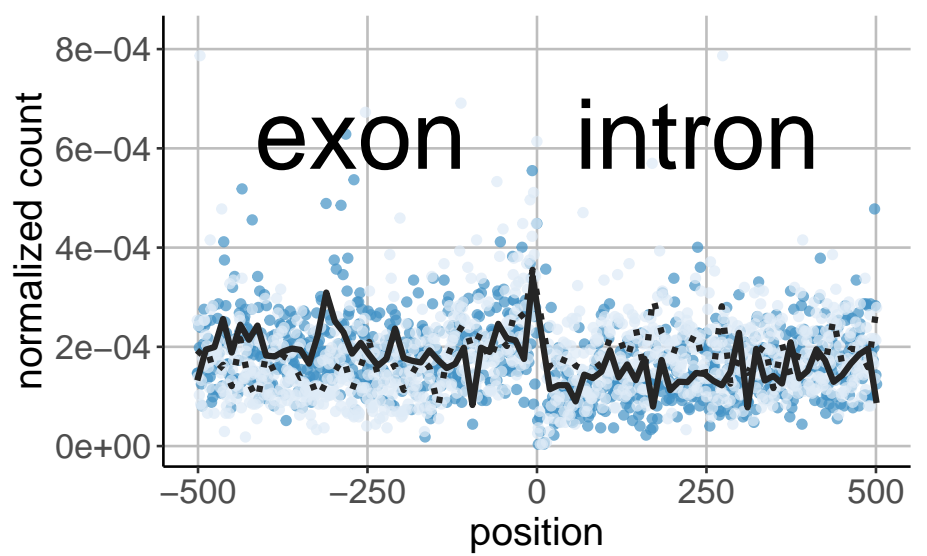

RC3H1\_2-YRCGUUUUAGKR

•• antisense — sense    • antisense • sense

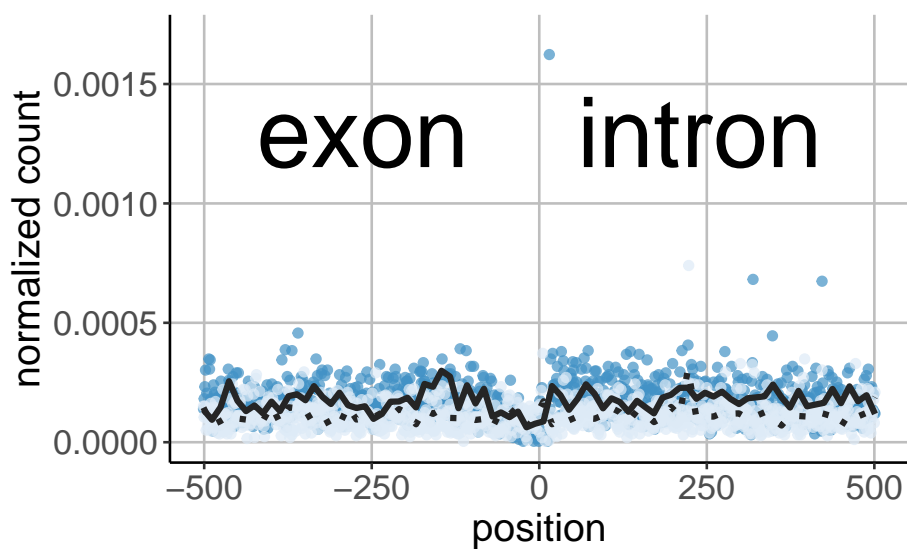

RC3H2-CURCGUUUUAGKAG

•• antisense — sense    • antisense • sense

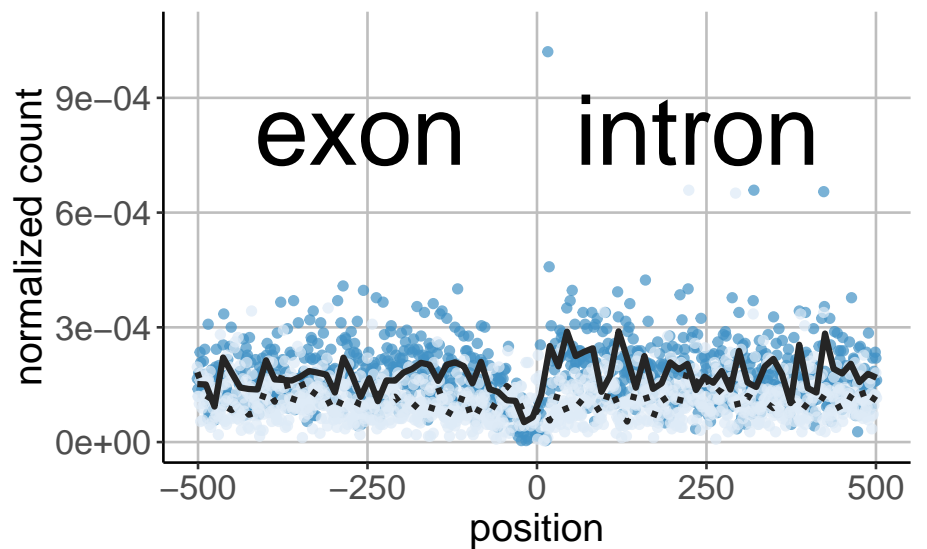

RC3H2-CUCGUAUCGAG

•• antisense — sense    • antisense • sense

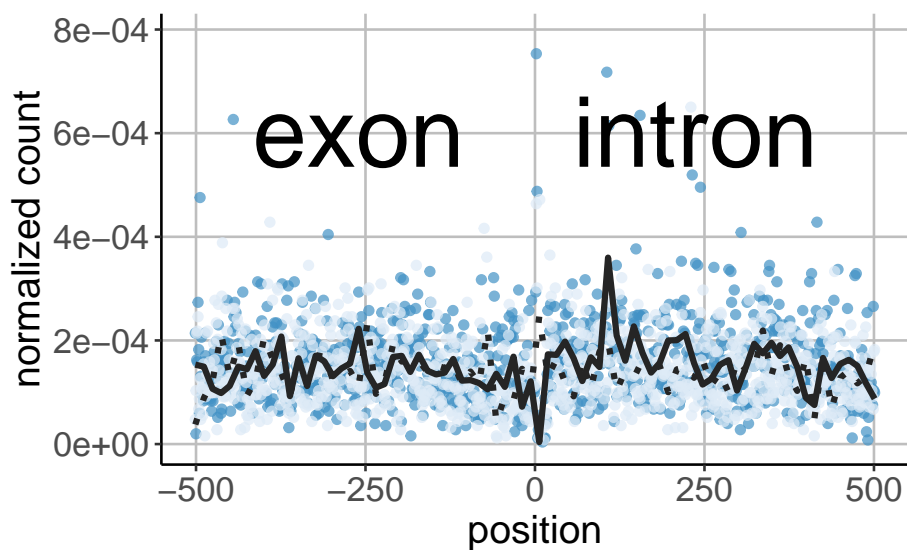

RC3H2-CCUCUNUGAGG

•• antisense — sense    • antisense • sense

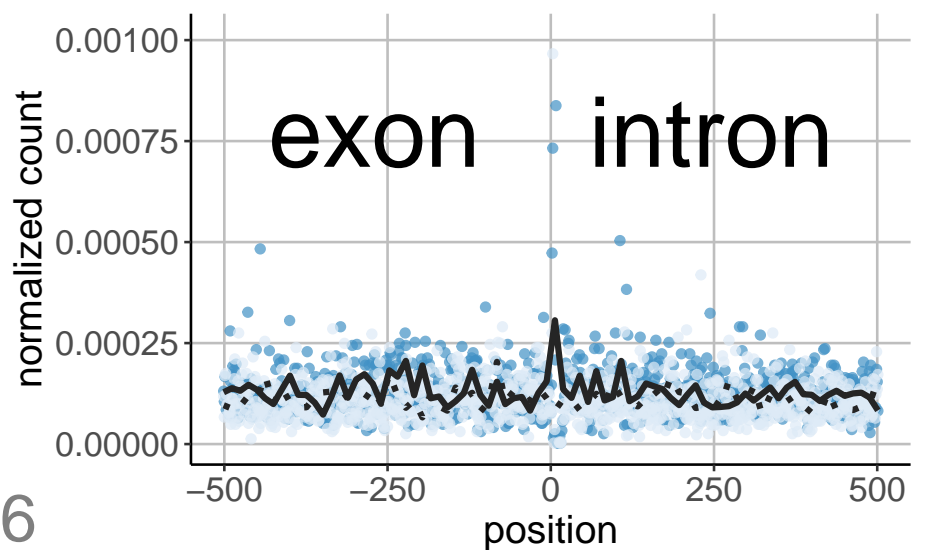

6



**DONOR**

RNPC3-GCAGUKUUAGGGY

• antisense — sense    • antisense • sense

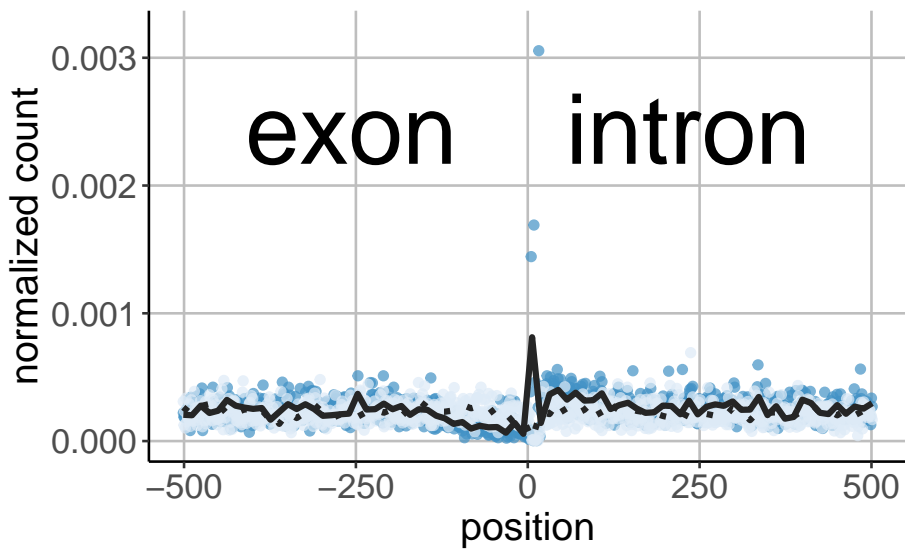

YBX1-RCCAYRHCAUCGY

• antisense — sense    • antisense • sense

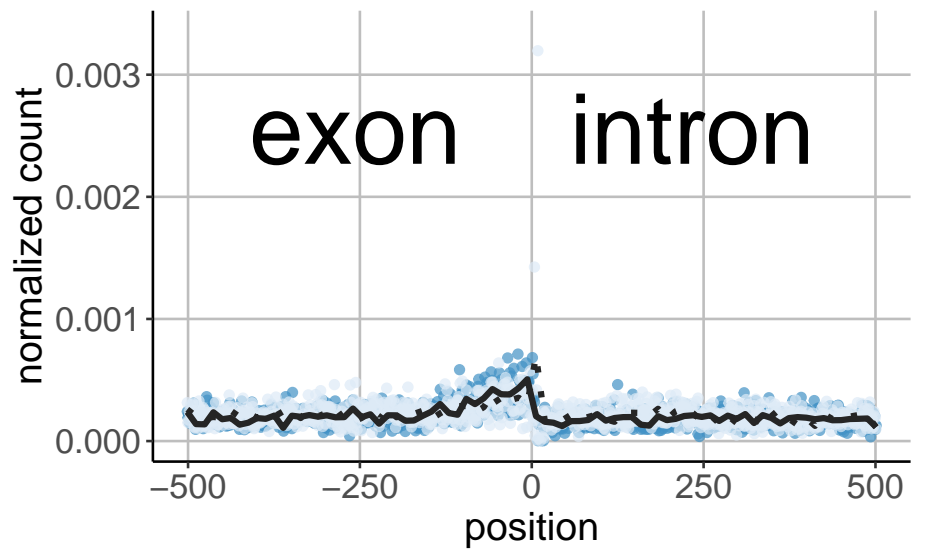

ZC3H12A-NGCAGGUAAGUGCN

• antisense — sense    • antisense • sense

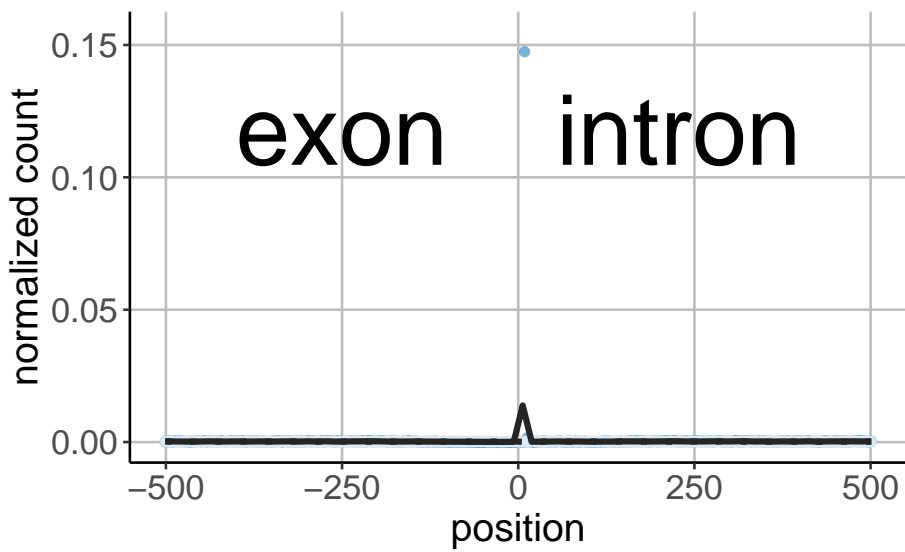

ZC3H12B-NGCAGGUAAGUGSN

• antisense — sense    • antisense • sense

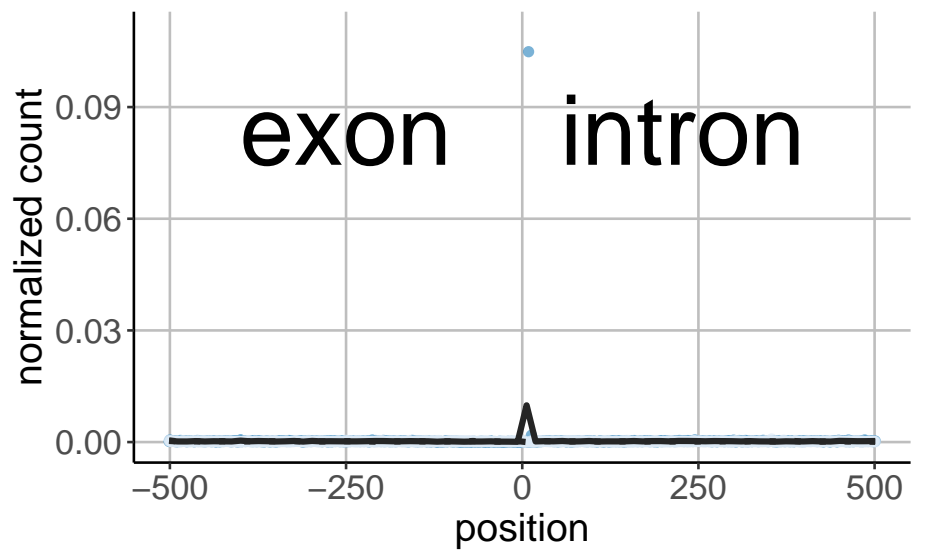

ZC3H12B-SCAGGUAUUAUGS

• antisense — sense    • antisense • sense

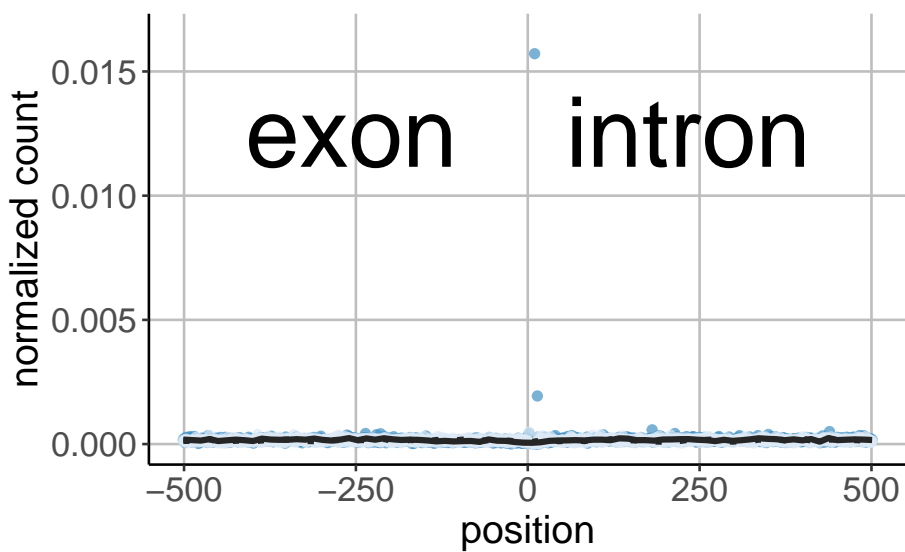

TSS

ZC3H8-GCUUGC

•• antisense — sense    • antisense • sense

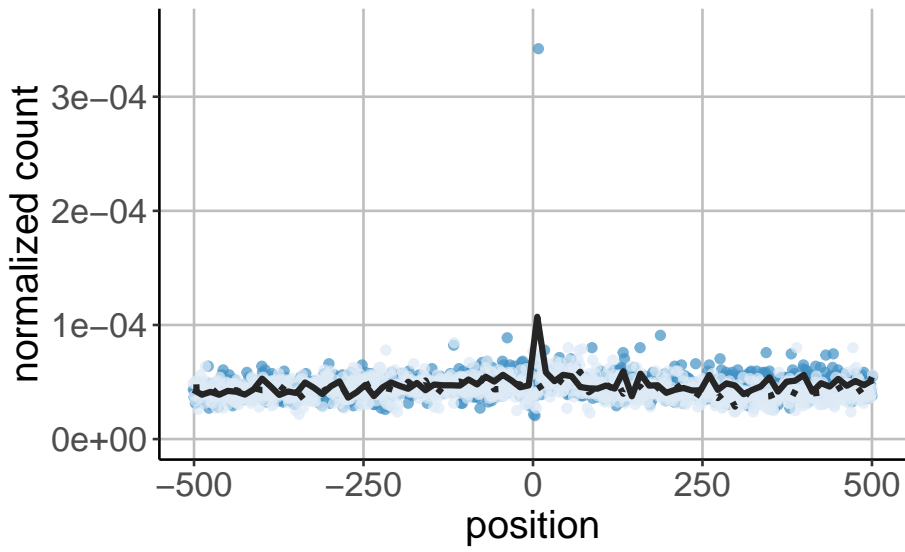

ESRP1\_3-GGUGUUGGUG

•• antisense — sense    • antisense • sense

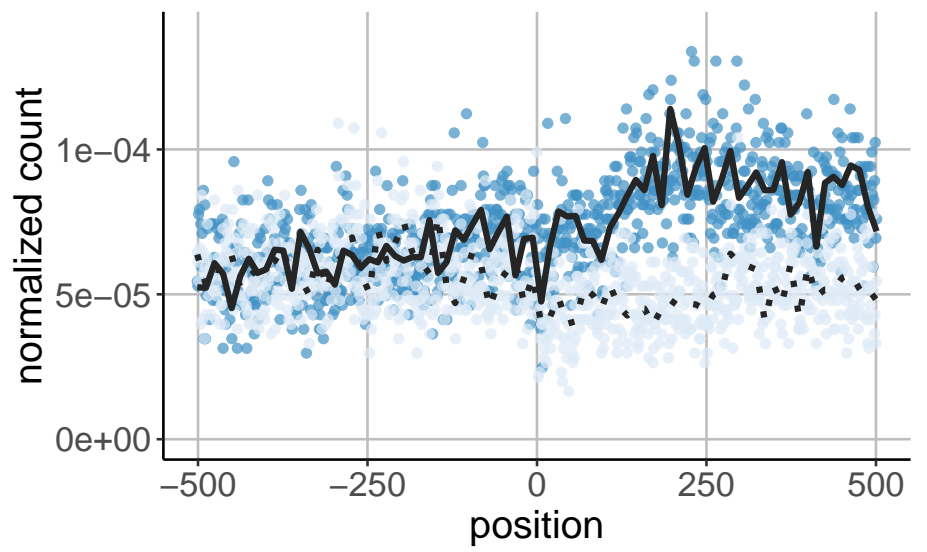

ELAVL3-GUUUUUG

•• antisense — sense    • antisense • sense

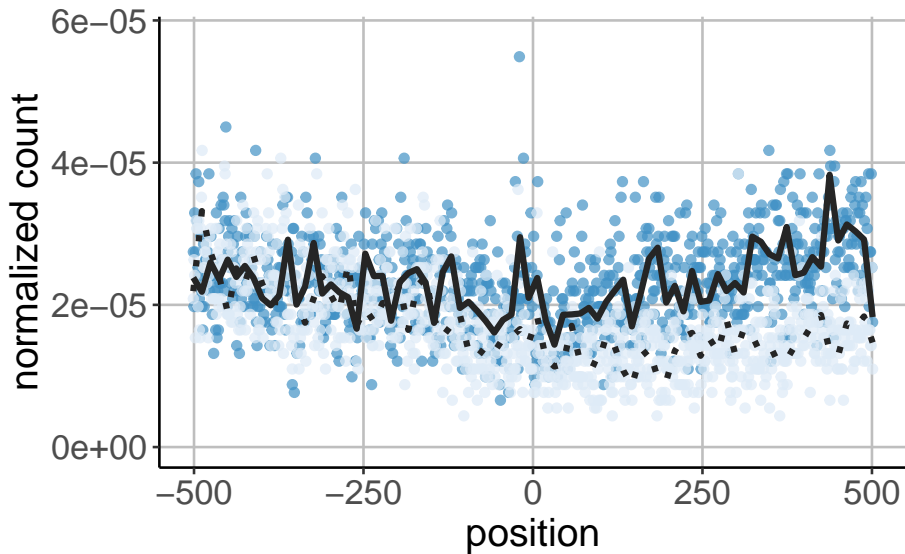

PUM1-NUGUAAAUAG

•• antisense — sense    • antisense • sense

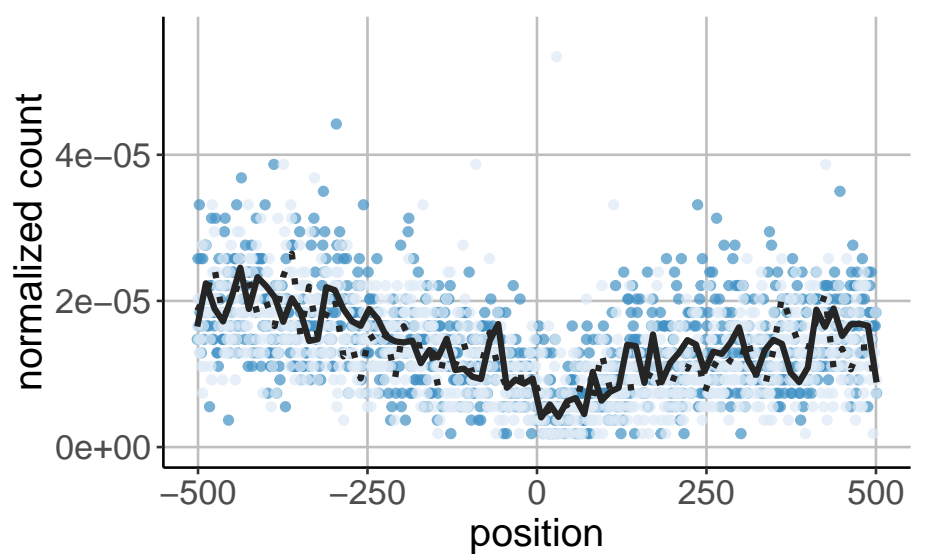

QKI-NUACUAACAWN

•• antisense — sense    • antisense • sense

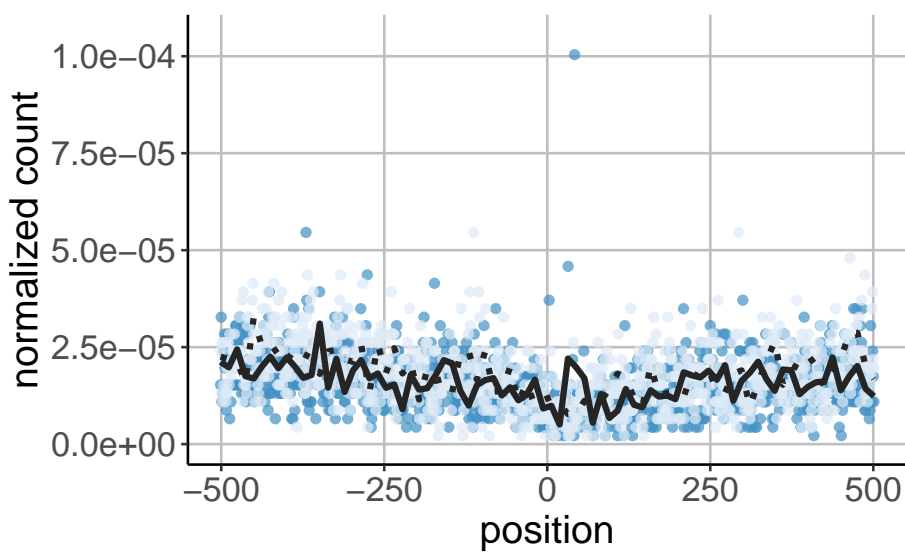

MCM3AP-CGCCAGUGCG

•• antisense — sense    • antisense • sense

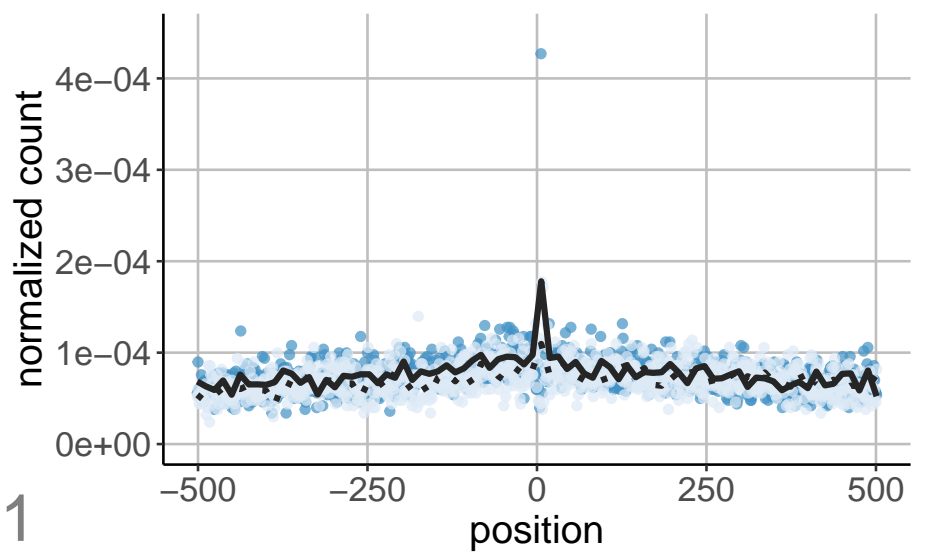

TSS

HNRNPC-UUUUUGGUGG

•• antisense — sense    • antisense • sense

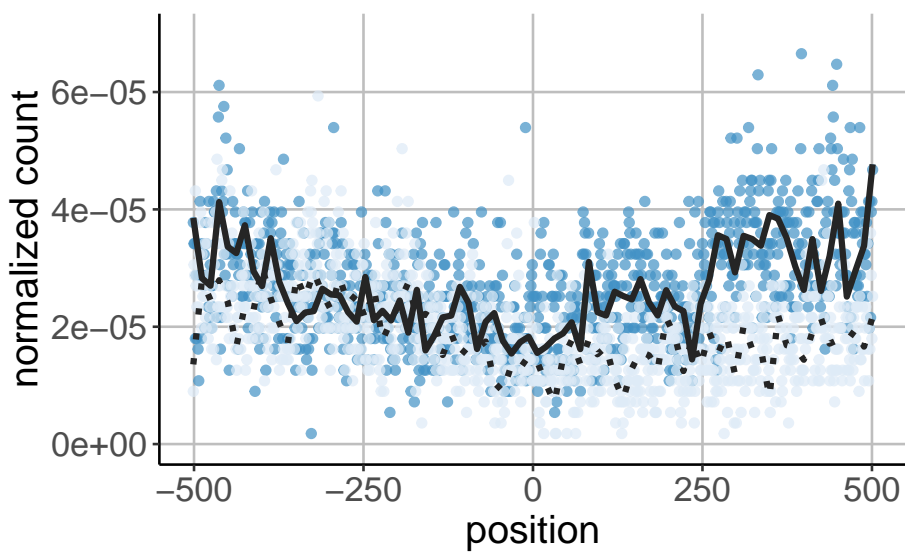

PABPC5-NUAKAAAKUURCN

•• antisense — sense    • antisense • sense

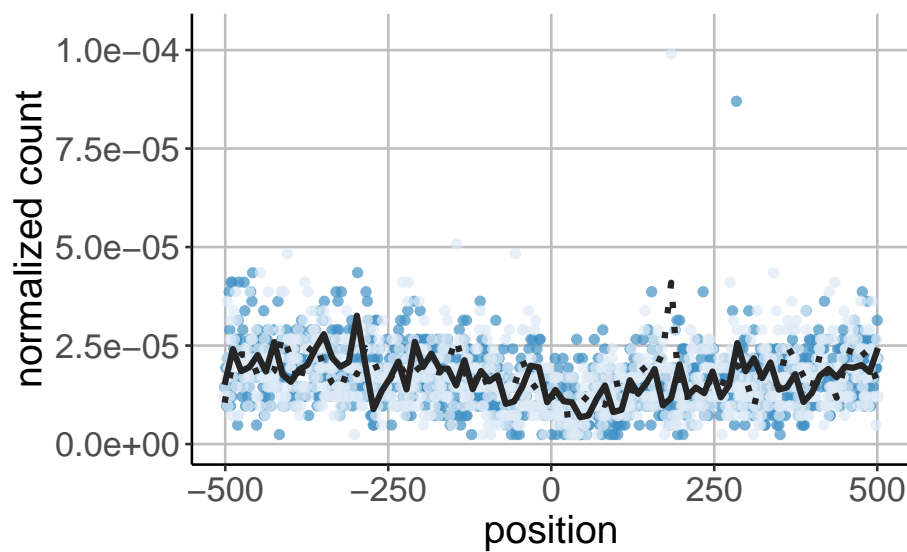

PABPC5-NUAKAAAUUACUACAN

•• antisense — sense    • antisense • sense

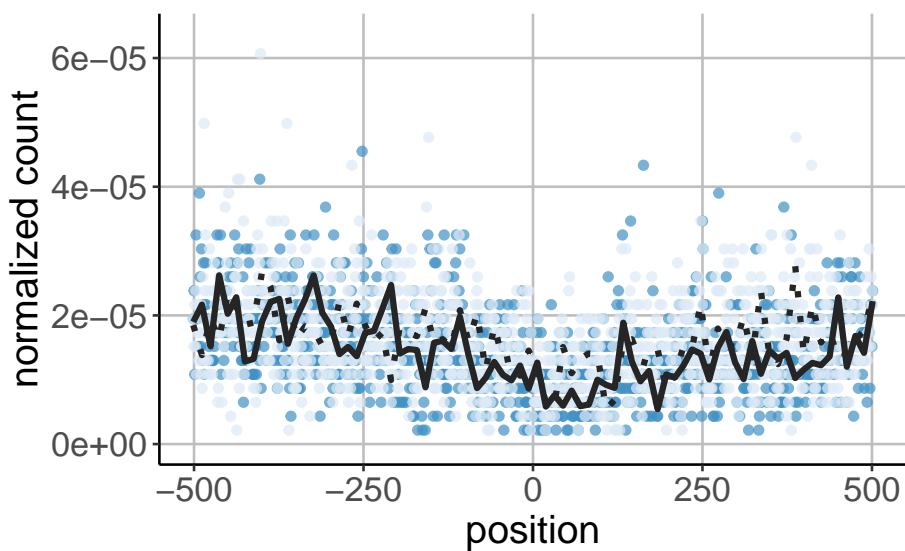

LARP7\_4-GRUCGUGAUGN

•• antisense — sense    • antisense • sense

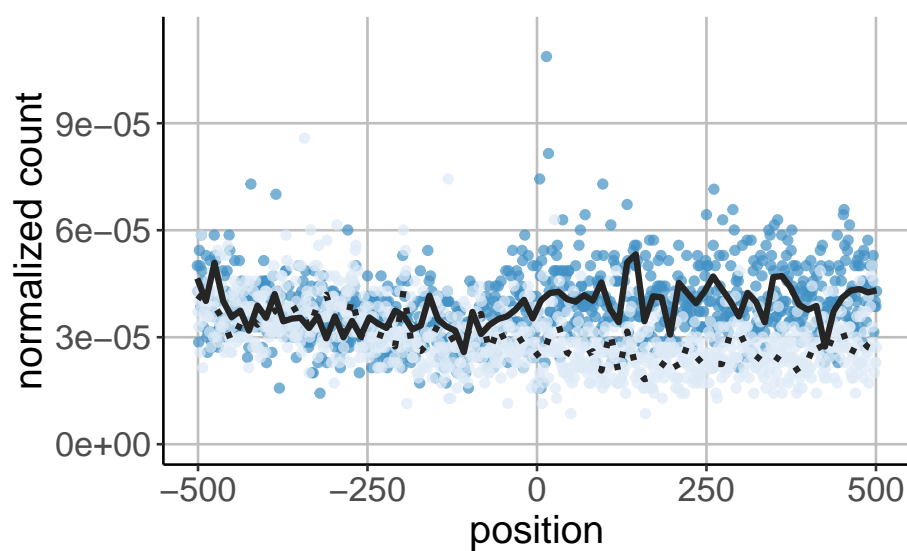

ZCRB1-GUAUUAAGGG

•• antisense — sense    • antisense • sense

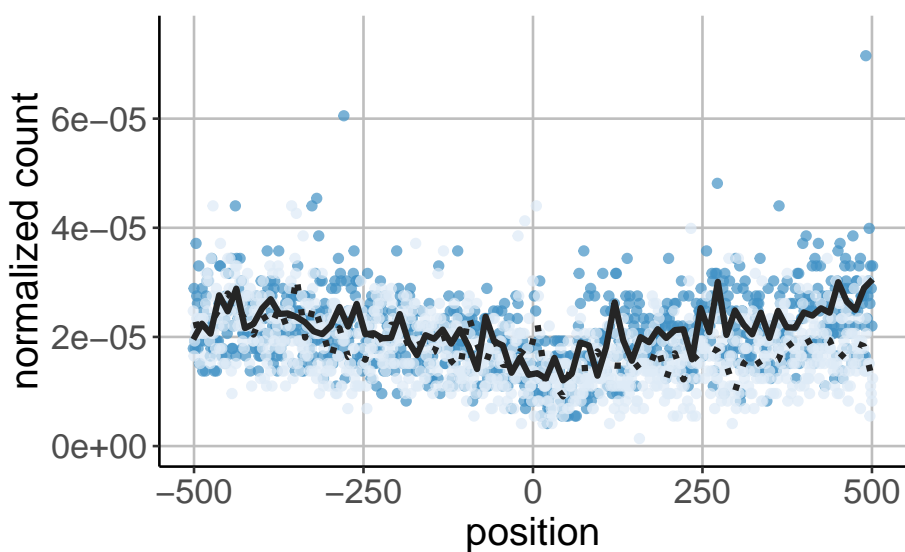

ZCRB1-GUGGACUUAANNN

•• antisense — sense    • antisense • sense

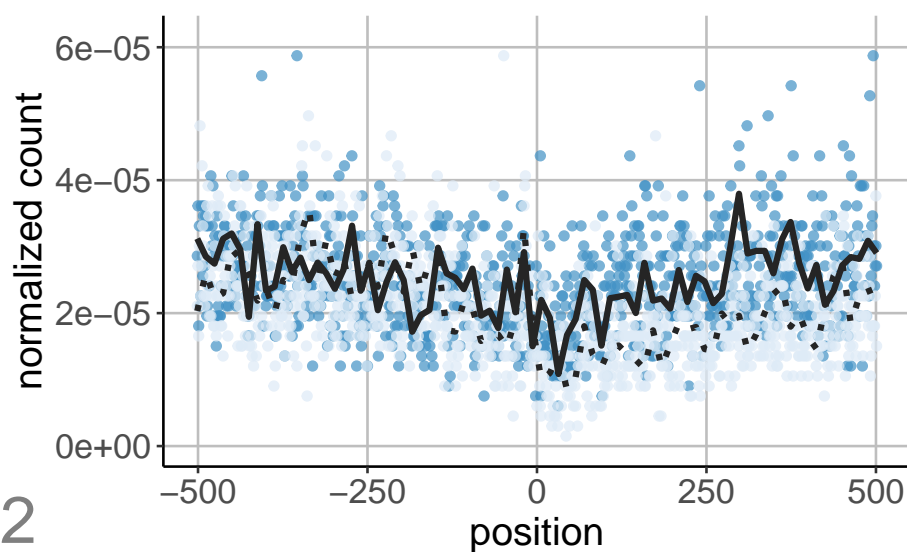

2

TSS

RBM42-NGGAACUAAN

•• antisense — sense    • antisense • sense

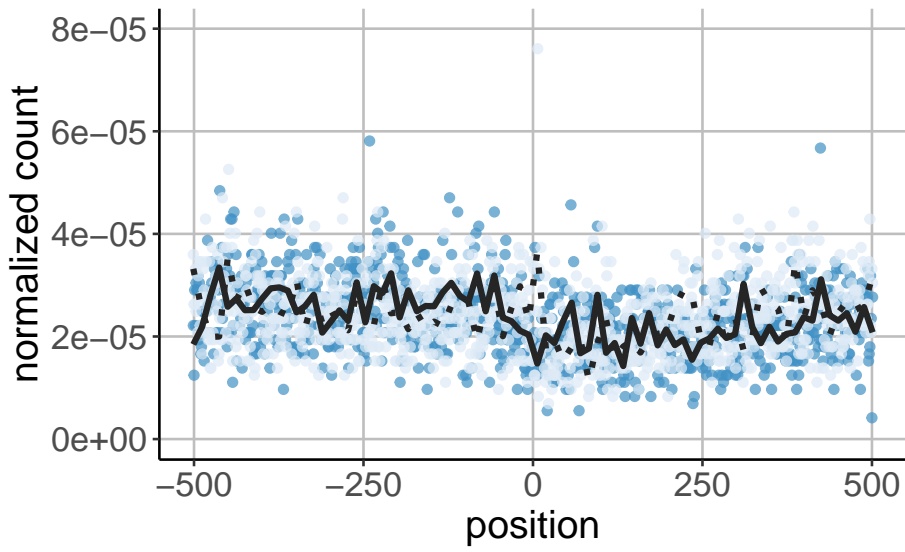

KHDRBS1-UAAUAGN

•• antisense — sense    • antisense • sense

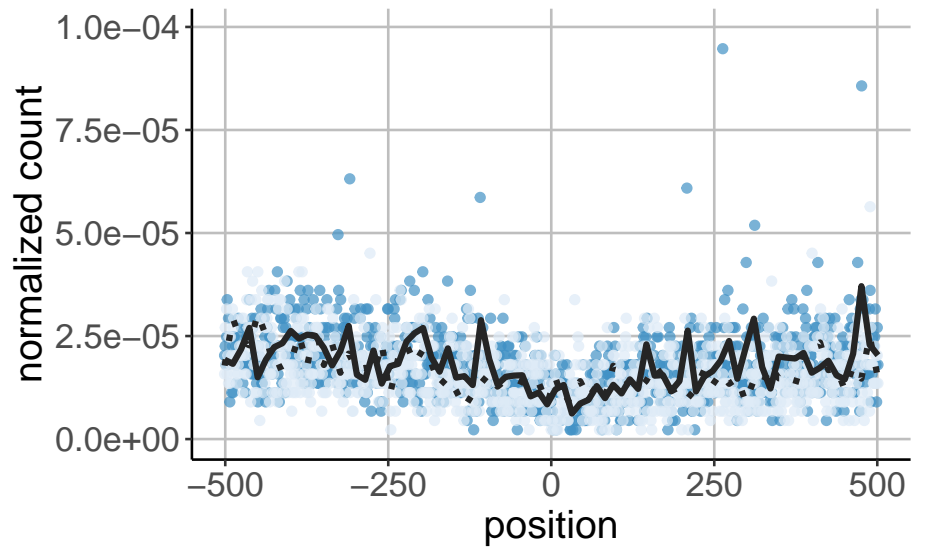

HNRNPCL1-GUUUUUUGGG

•• antisense — sense    • antisense • sense

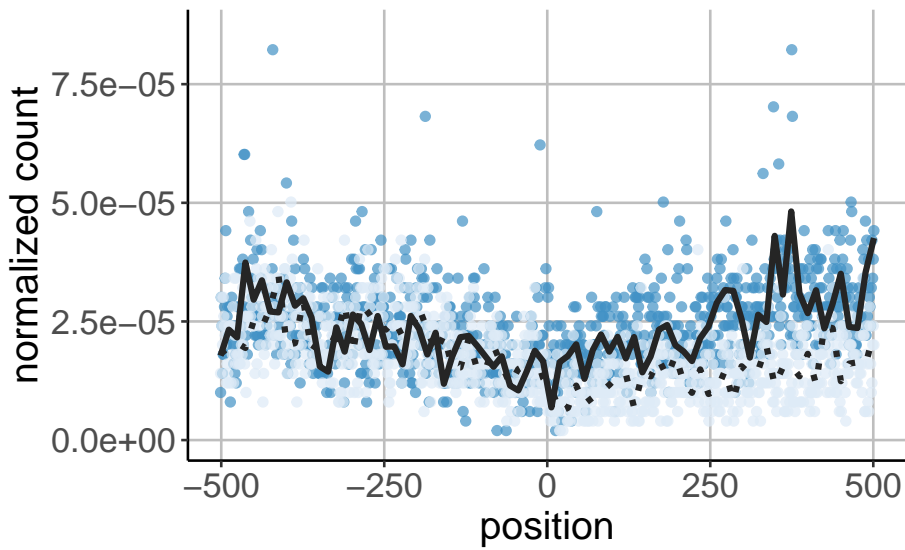

ZFR\_4-GUGACGGAUG

•• antisense — sense    • antisense • sense

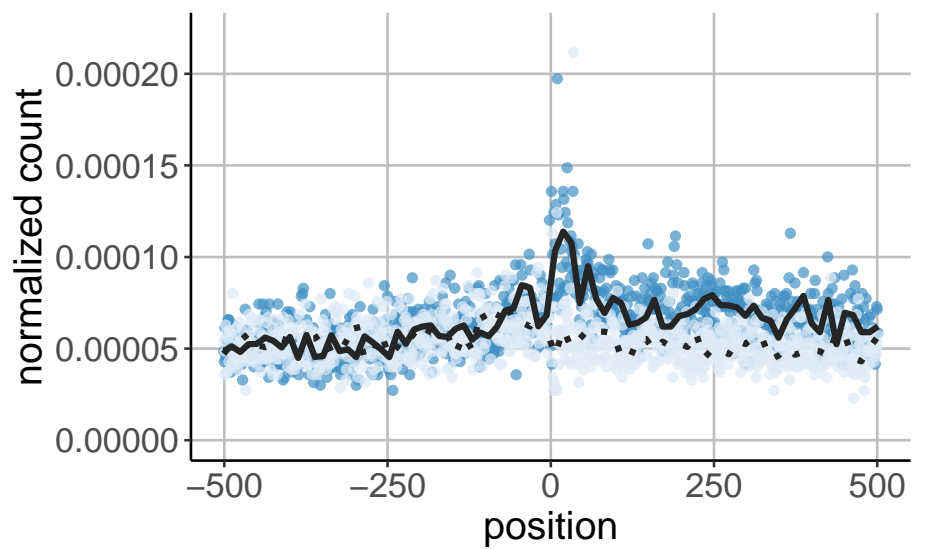

ZFR\_4-GUGCGGAUGN

•• antisense — sense    • antisense • sense

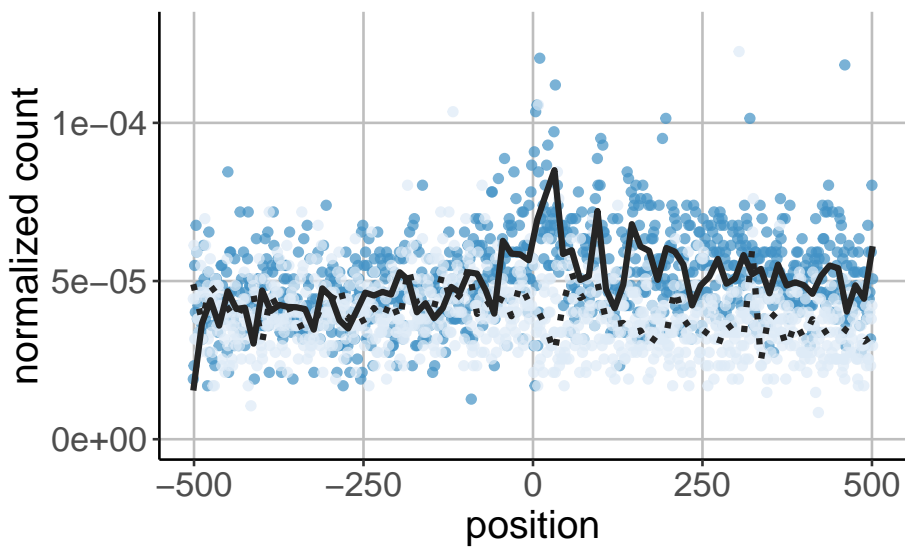

HNRPLL-GCAURCAYCC

•• antisense — sense    • antisense • sense

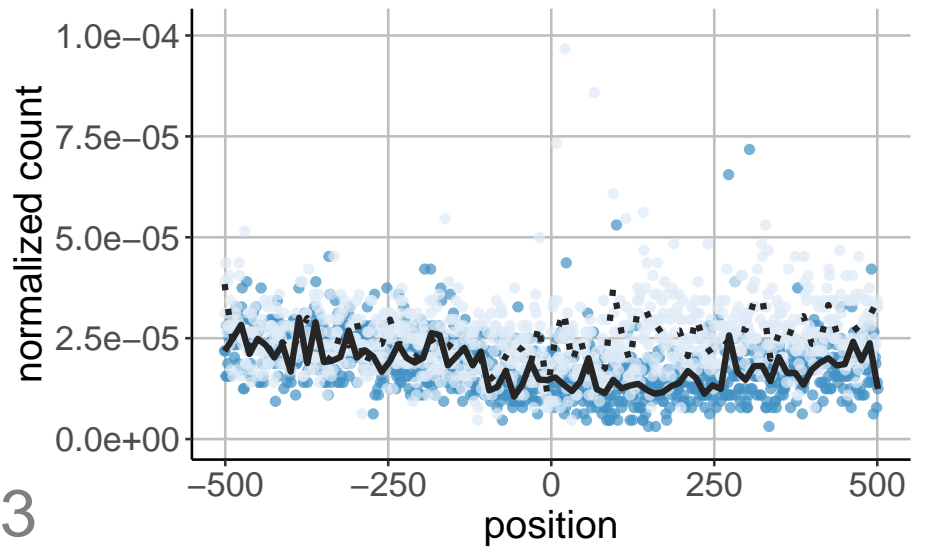

3

TSS

ZC3H12C-NUGCGNCAGUCGGUAGC

•• antisense — sense    • antisense • sense

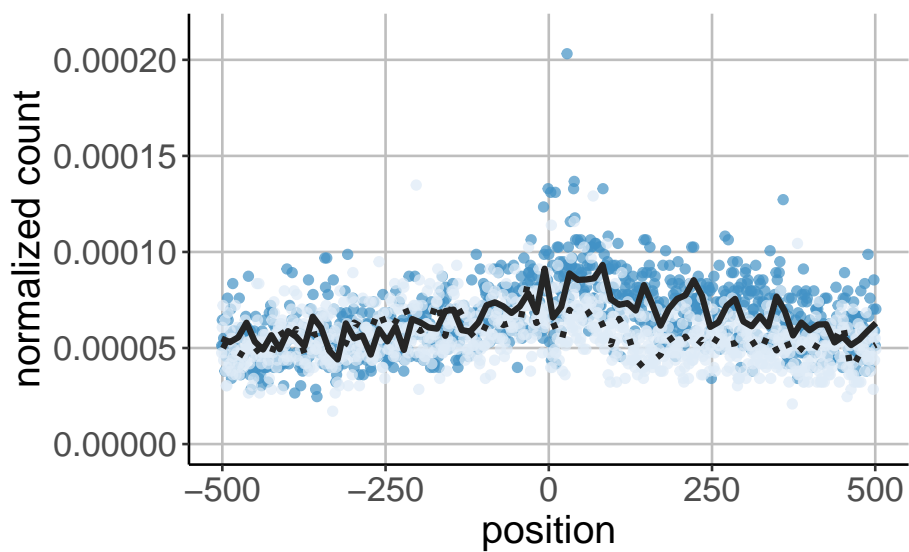

HNRNPL\_2-ACAUWWCAUW

•• antisense — sense    • antisense • sense

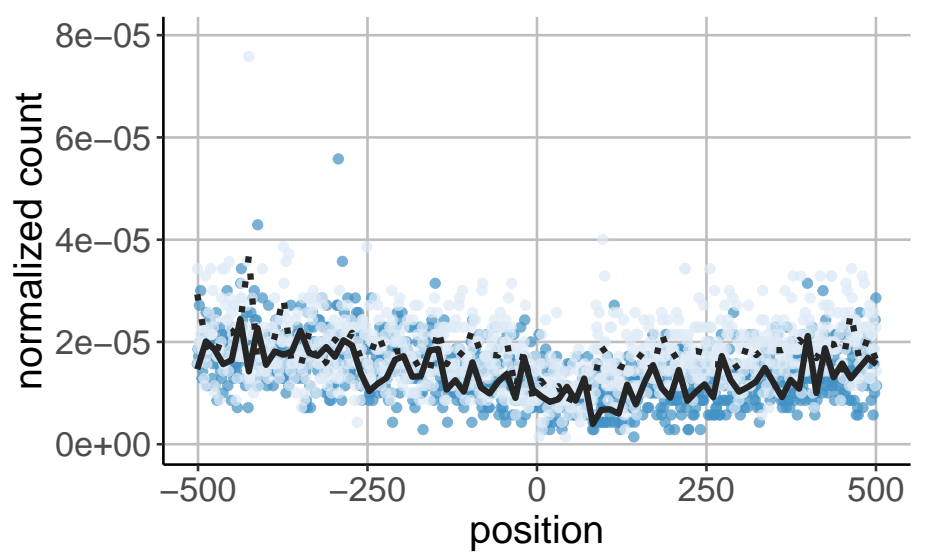

RBMS2-CAGUGAUUGG

•• antisense — sense    • antisense • sense

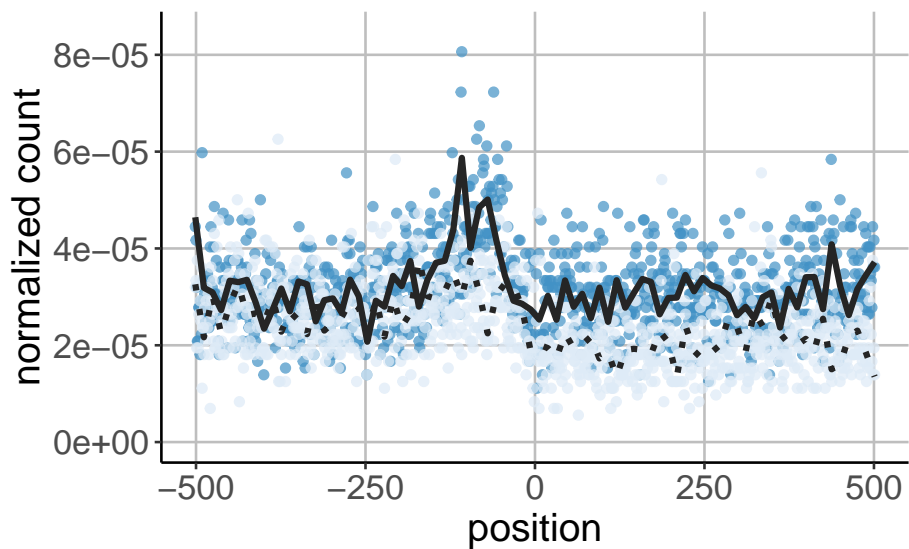

RBM14-GGKUGCGUCG

•• antisense — sense    • antisense • sense

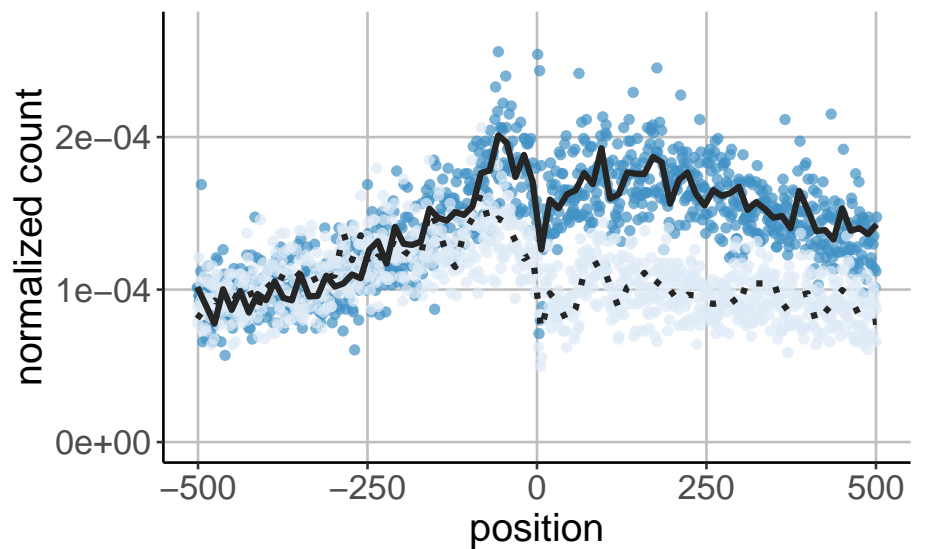

RBMS2-CGUAUAUAG

•• antisense — sense    • antisense • sense

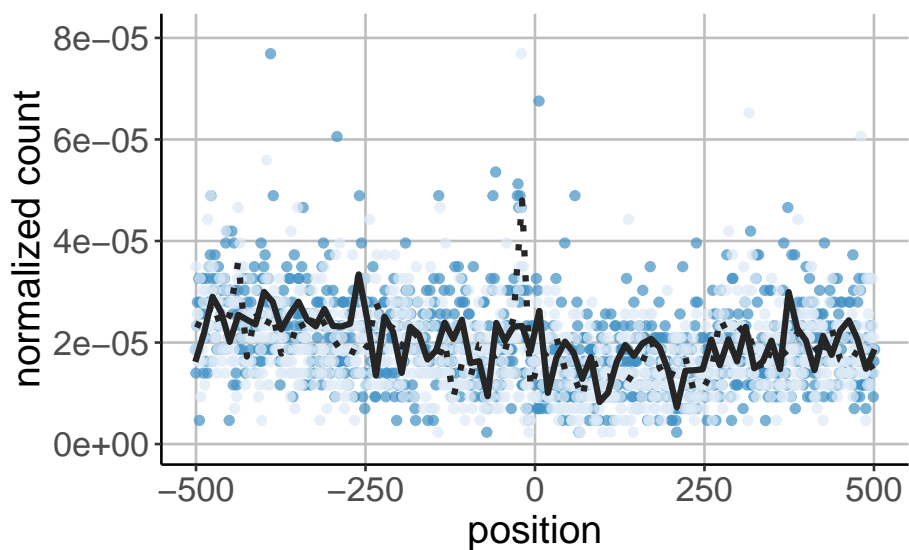

RBMS1-GUAUUUAKNGGG

•• antisense — sense    • antisense • sense

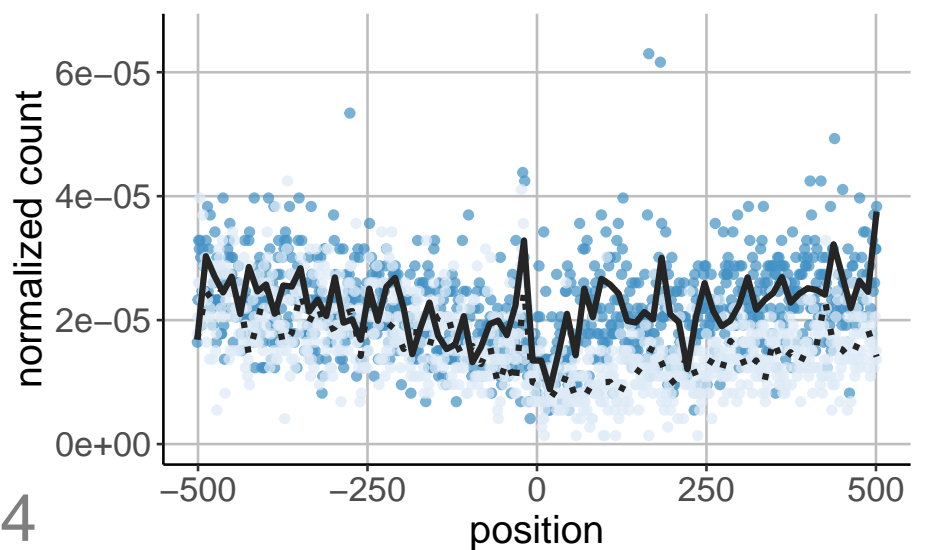

TSS

RBMS1-UUAUAAUCAAC

•• antisense — sense    • antisense • sense

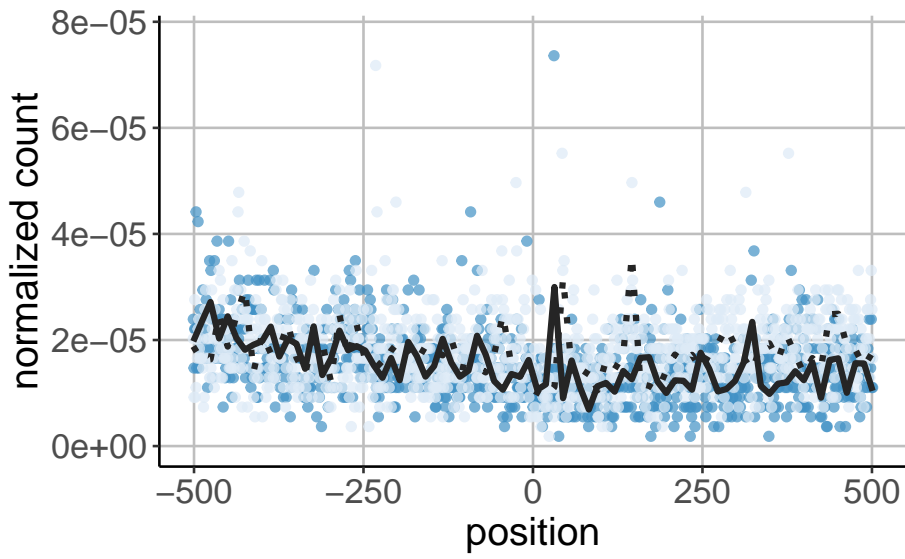

NOVA2\_3-UCAUUCAU

•• antisense — sense    • antisense • sense

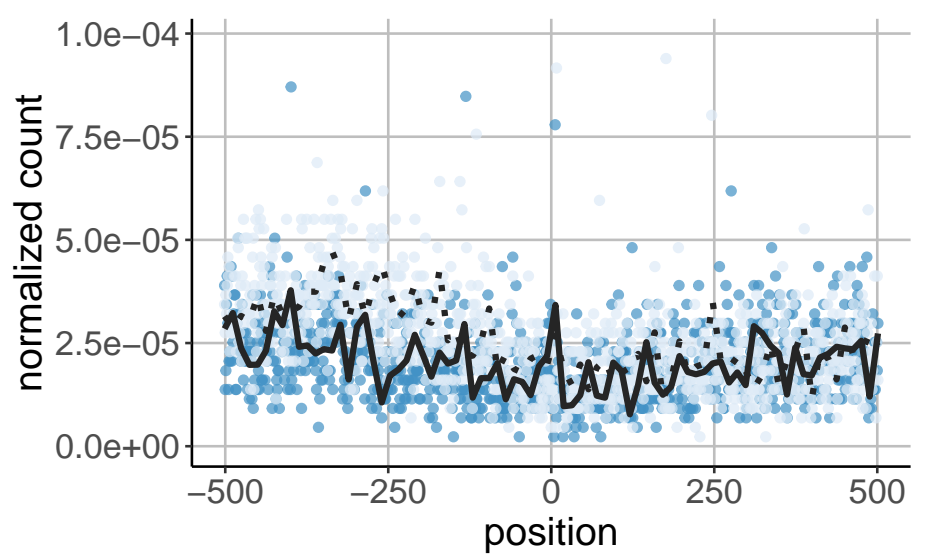

ZFP36-KUAUUUAUGGUGG

•• antisense — sense    • antisense • sense

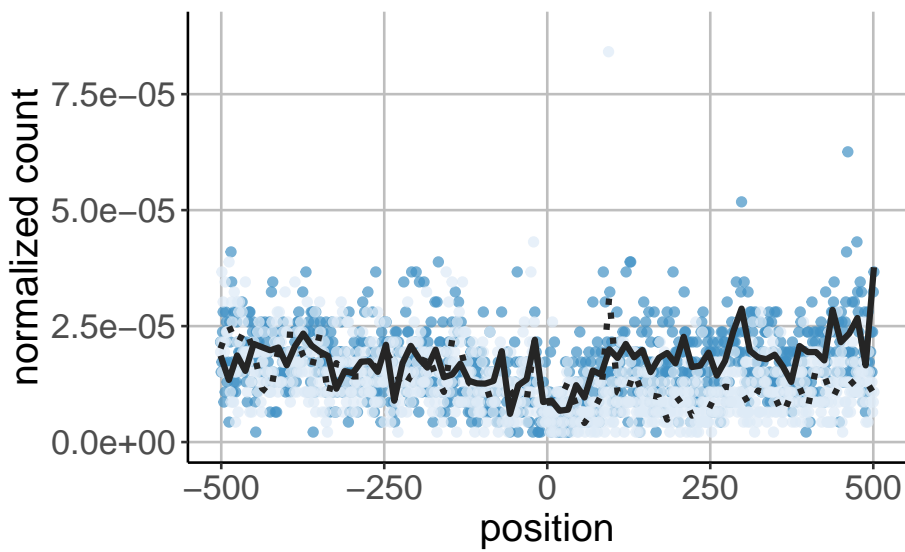

ZFP36-UUAUUUAUU

•• antisense — sense    • antisense • sense

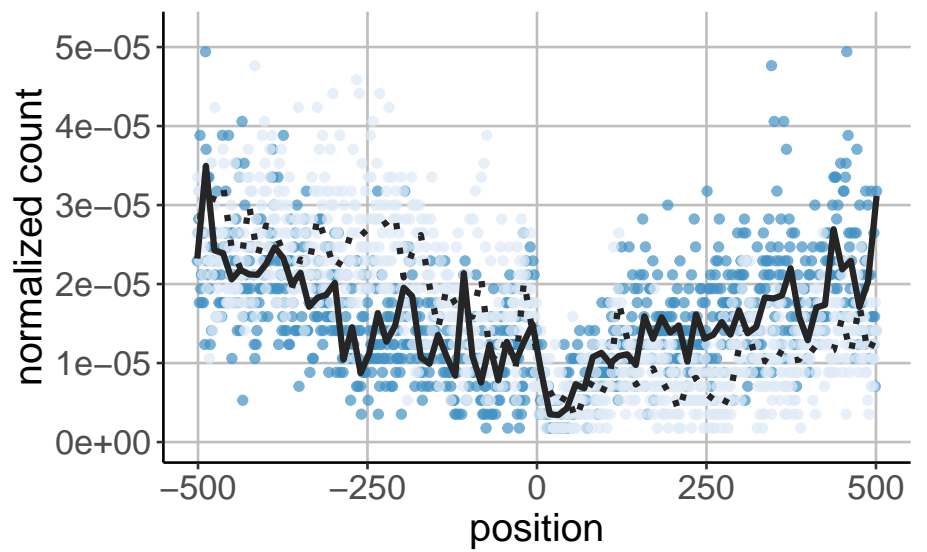

ELAVL4-UUUUAUUUUG

•• antisense — sense    • antisense • sense

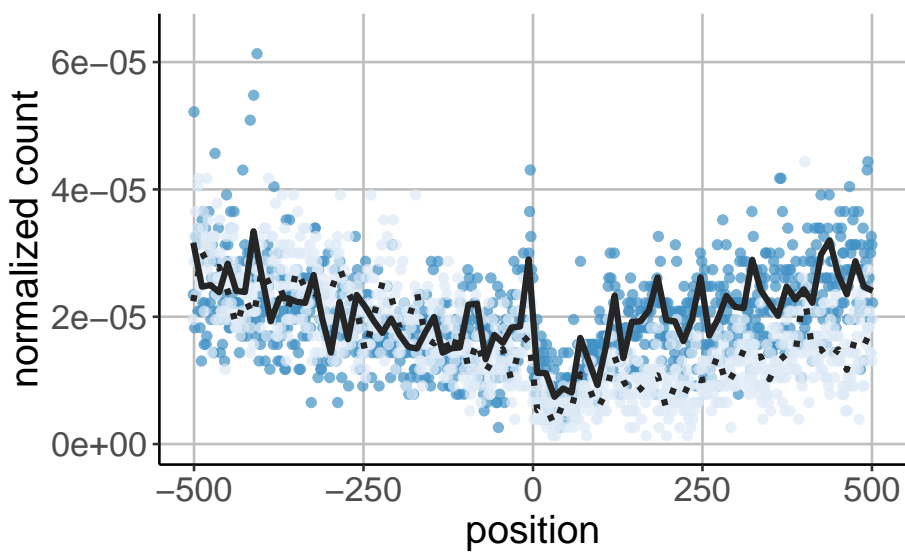

QKI-ACUAACANNACUAACA

•• antisense — sense    • antisense • sense

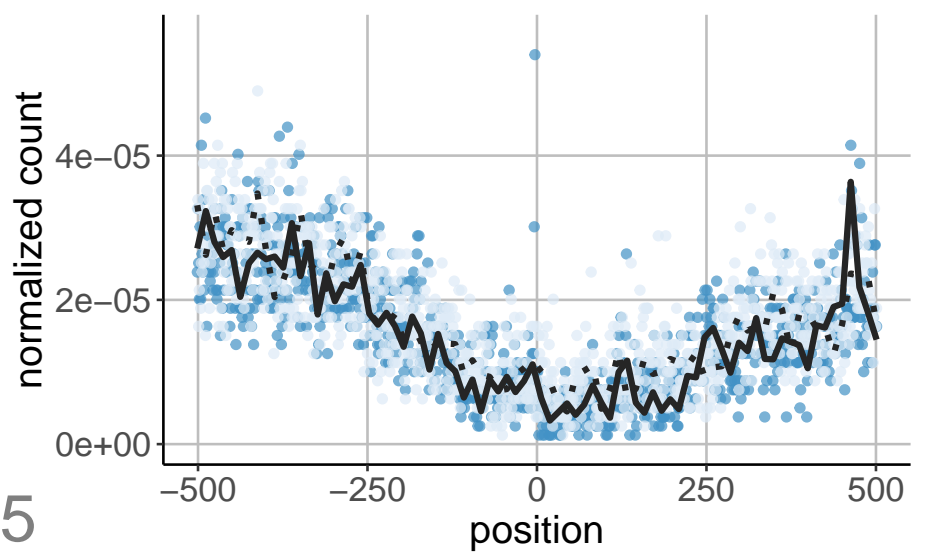

5

TSS

TARDBP-GUGUGAAUGG

•• antisense — sense    • antisense • sense

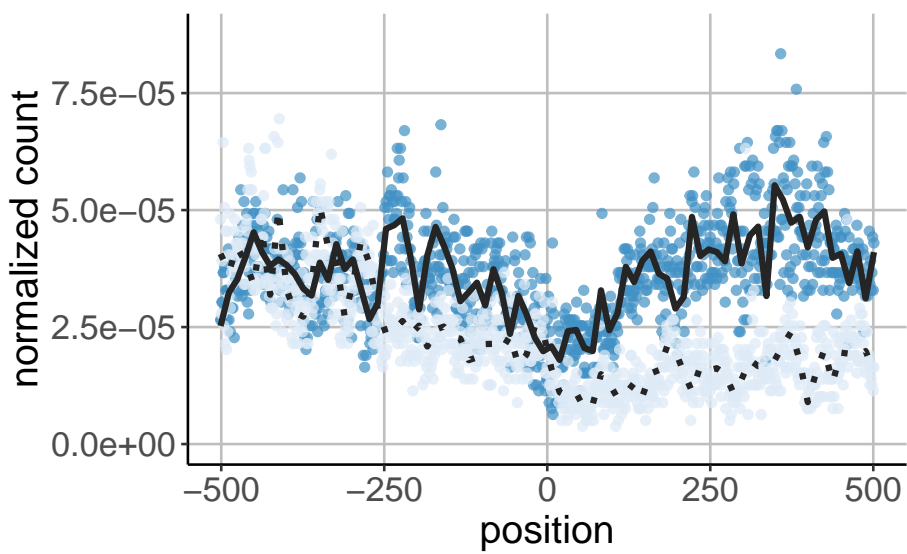

TARDBP-GUGUGNGUGUG

•• antisense — sense    • antisense • sense

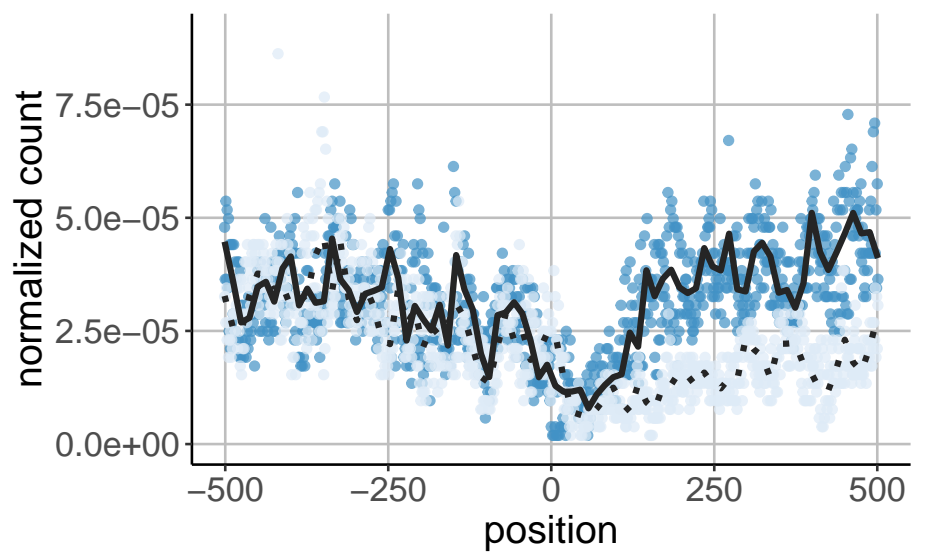

PUM2-NNUGUAYAGK

•• antisense — sense    • antisense • sense

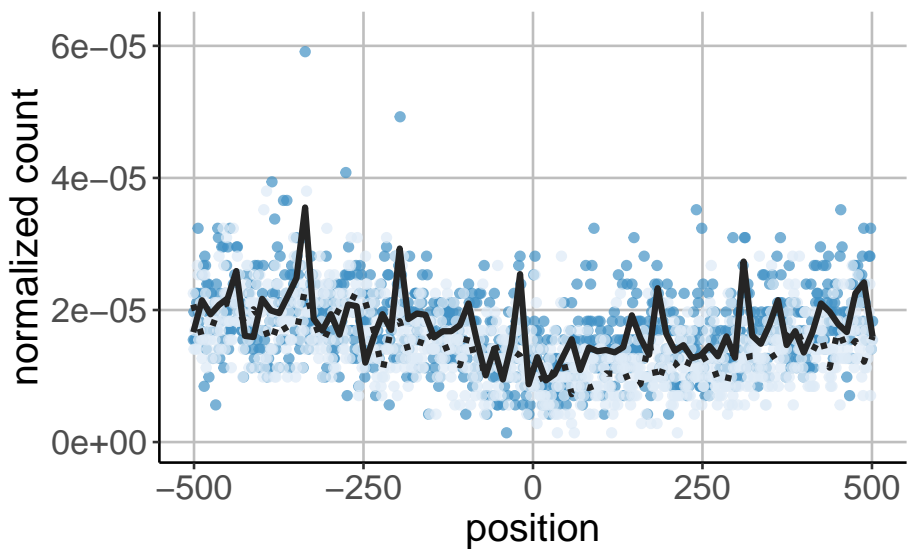

PUM2-NUGUAAAUAGKN

•• antisense — sense    • antisense • sense

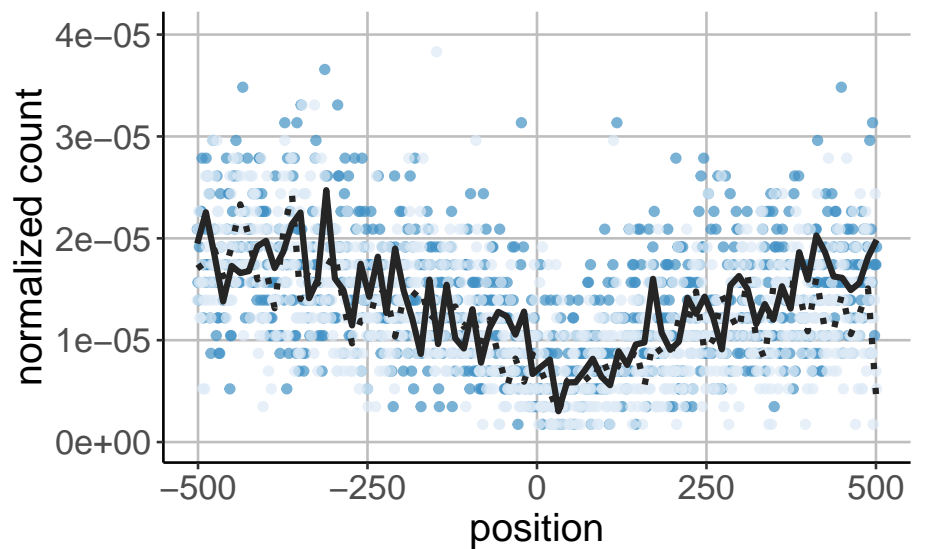

KHDRBS3-UAAANNNNNNNUAAA

•• antisense — sense    • antisense • sense

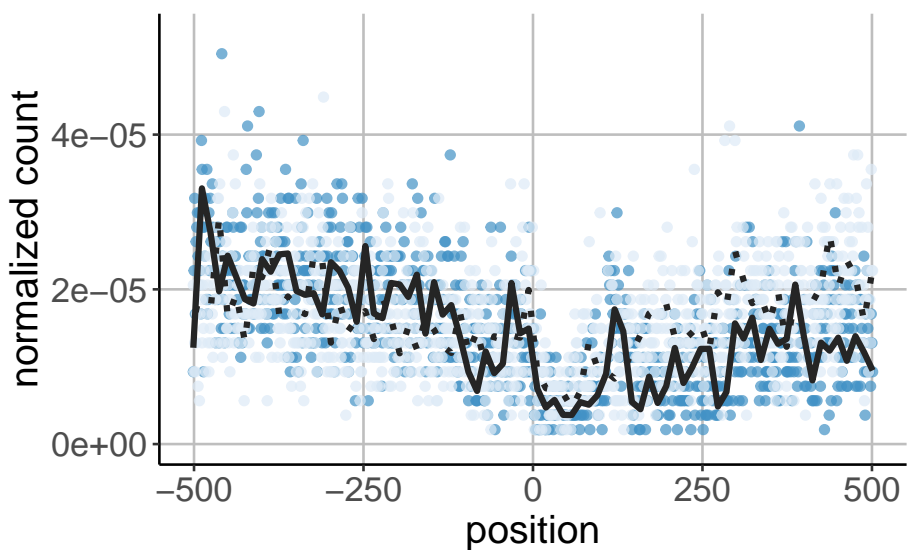

THUMPD1-UUCGUGGCUUG

•• antisense — sense    • antisense • sense

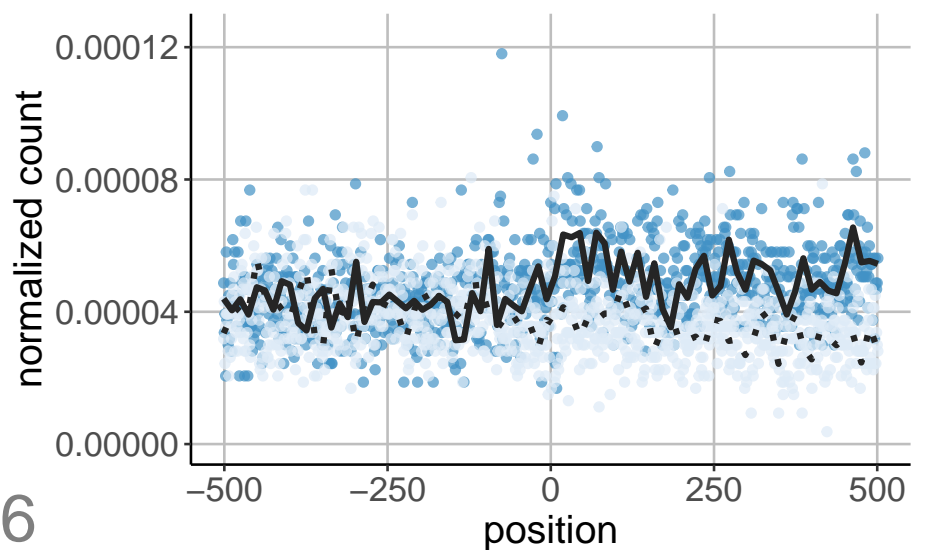

6

TSS

THUMPD1-WGCGCGGUYUU

•• antisense — sense    • antisense • sense

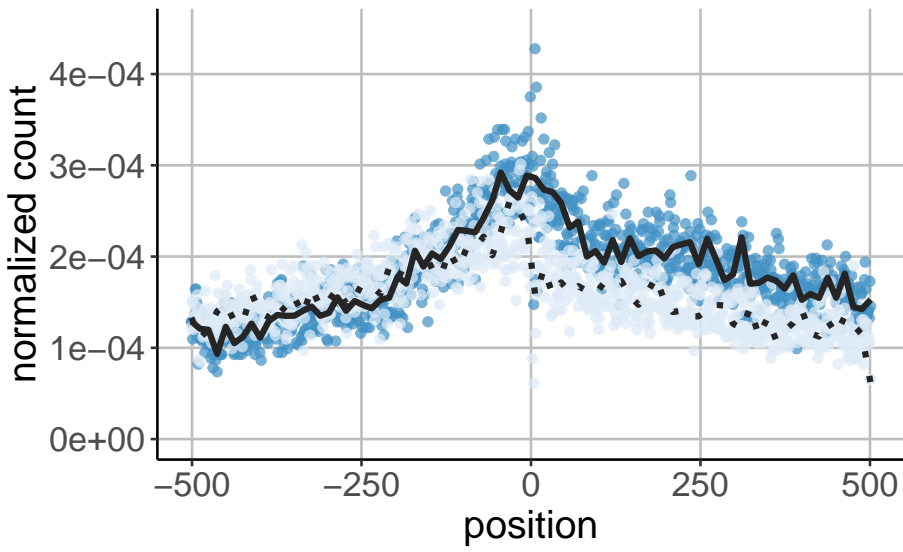

ZFR\_4-GGCACGGAUG

•• antisense — sense    • antisense • sense

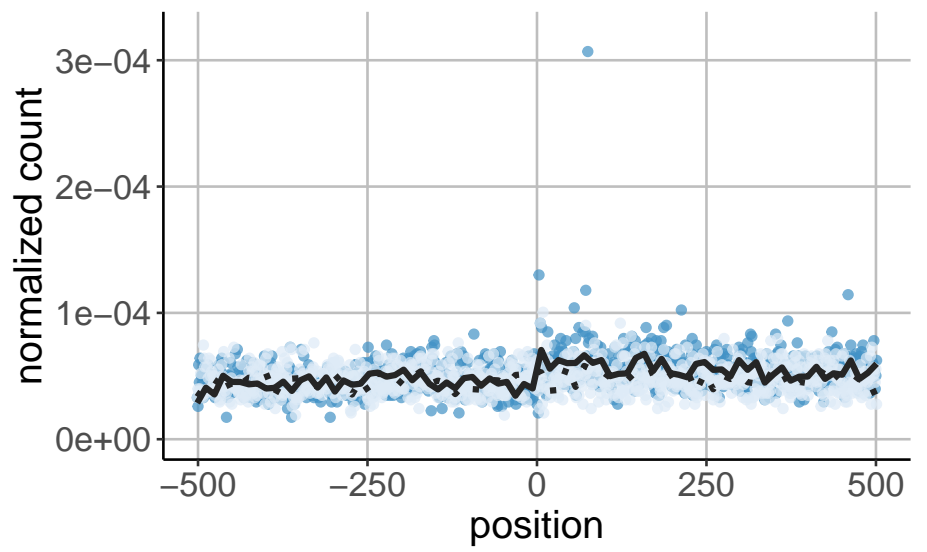

ZFR\_4-UUGCCGGAUGYCGU

•• antisense — sense    • antisense • sense

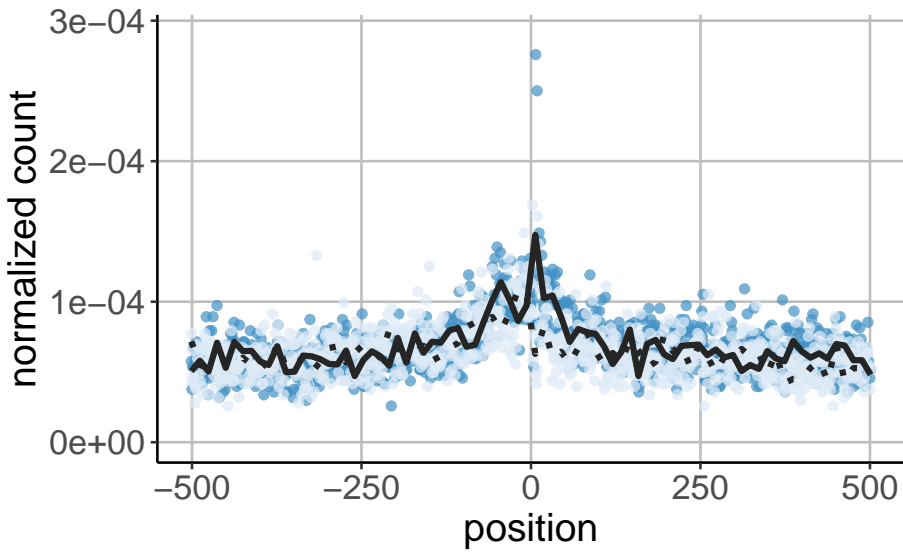

PCBP1-UCCUUNNCCUU

•• antisense — sense    • antisense • sense

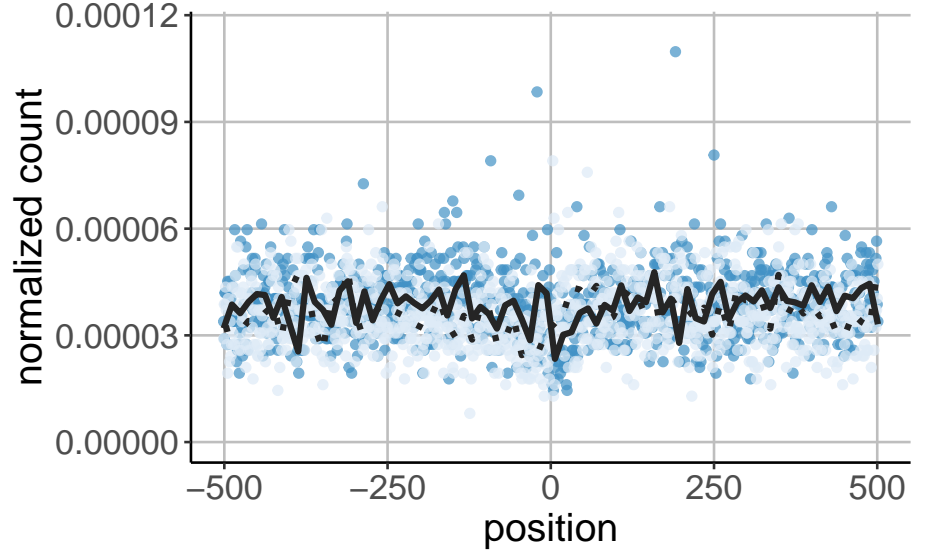

HNRNPA3-UAGGUUAGGG

•• antisense — sense    • antisense • sense

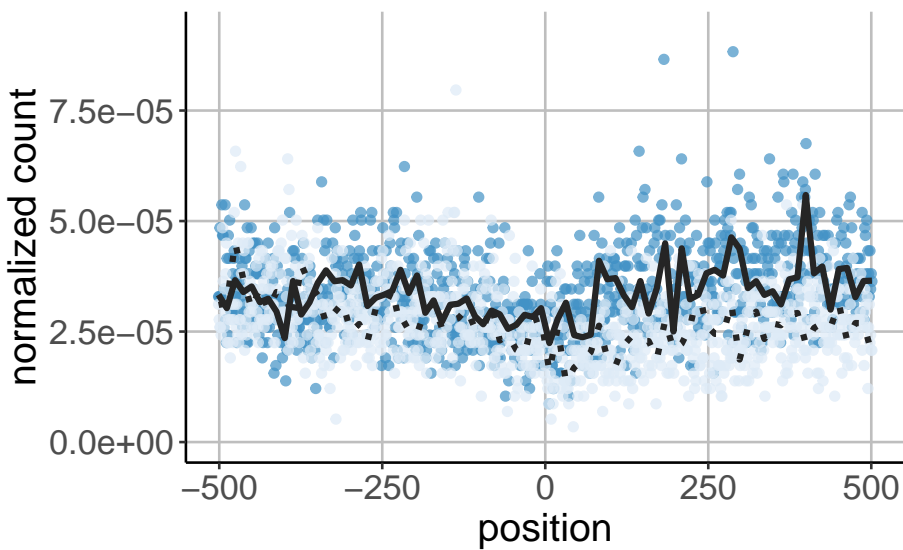

RBM38-KKGUGUGUGUGUKK

•• antisense — sense    • antisense • sense

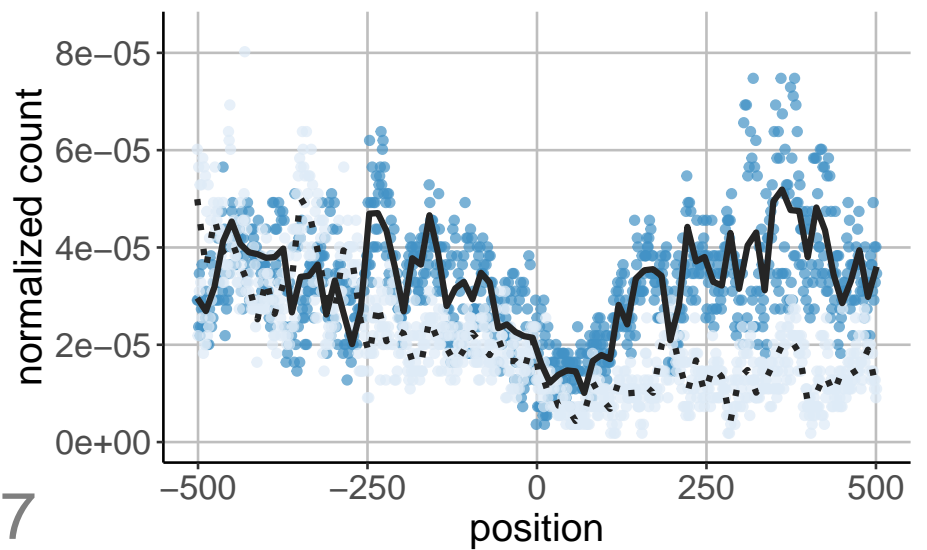



TSS

MEX3D-UNURUUUAUU

•• antisense — sense    • antisense • sense

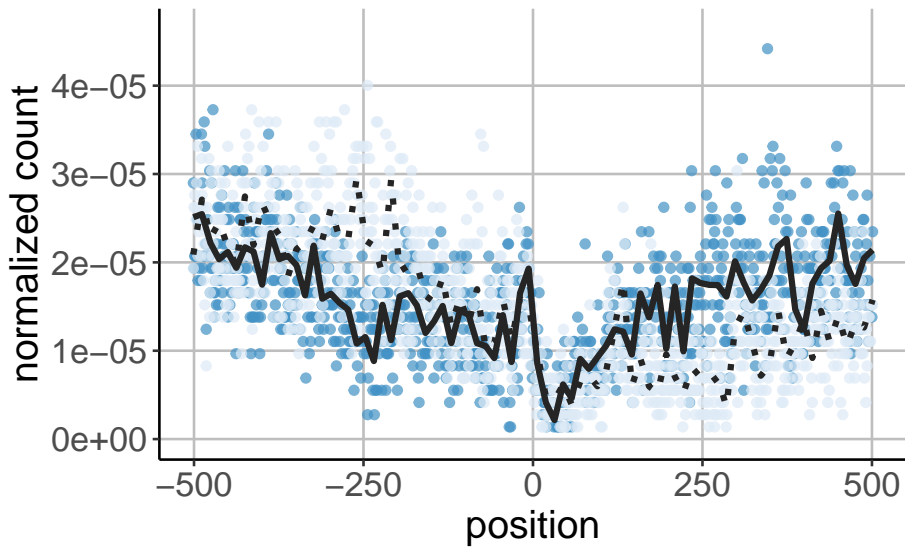

RBPM2-CACAGNGCACA

•• antisense — sense    • antisense • sense

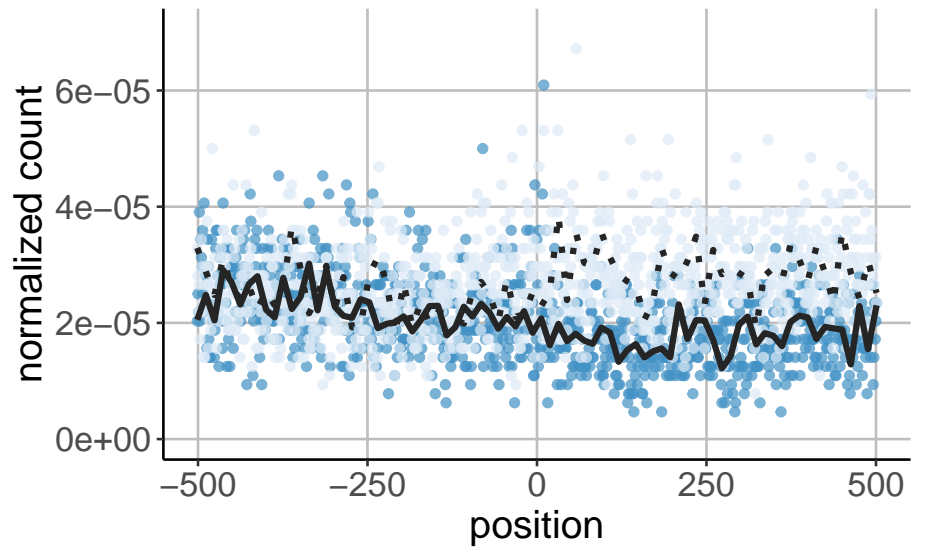

RBPM2-UCACRUGCACA

•• antisense — sense    • antisense • sense

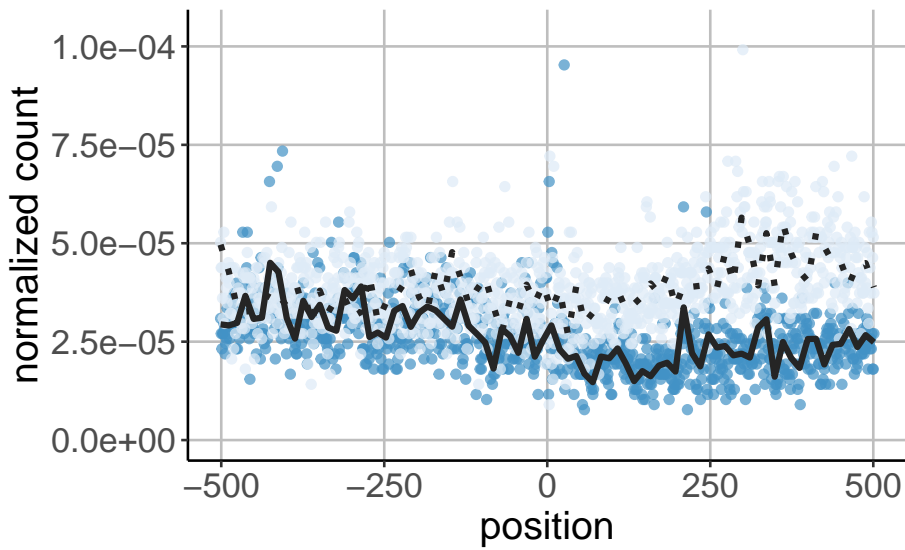

RBPM2-UGCACA

•• antisense — sense    • antisense • sense

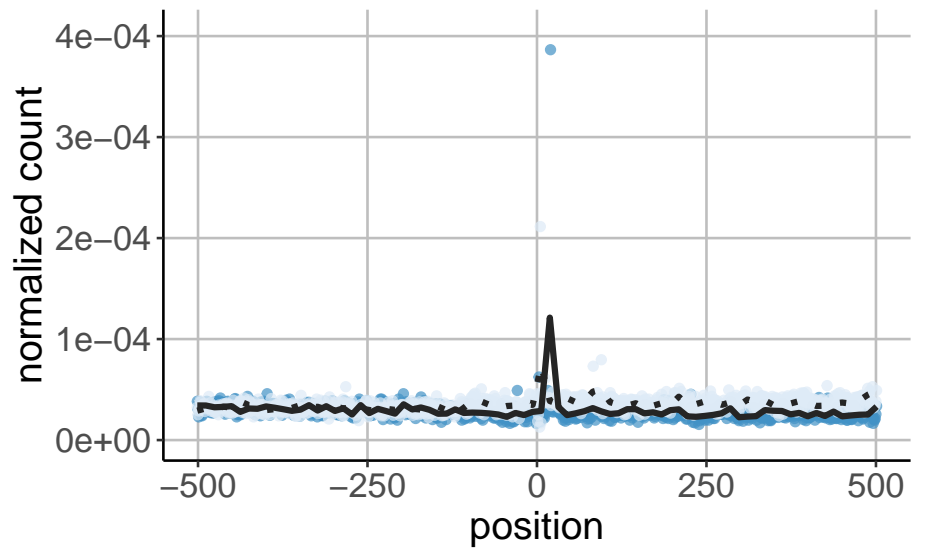

YBX2-GCCAUNNNAUCGC

•• antisense — sense    • antisense • sense

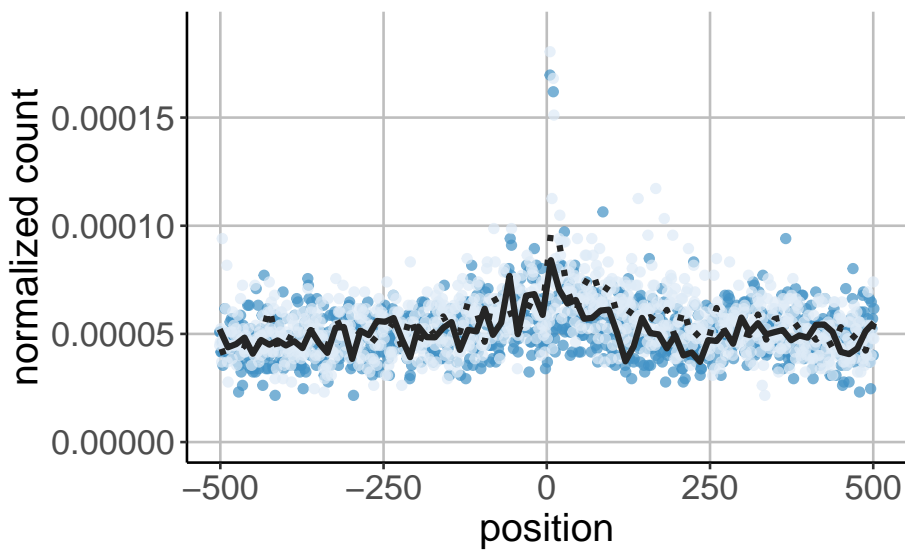

YBX2-NUAACAUCNN

•• antisense — sense    • antisense • sense

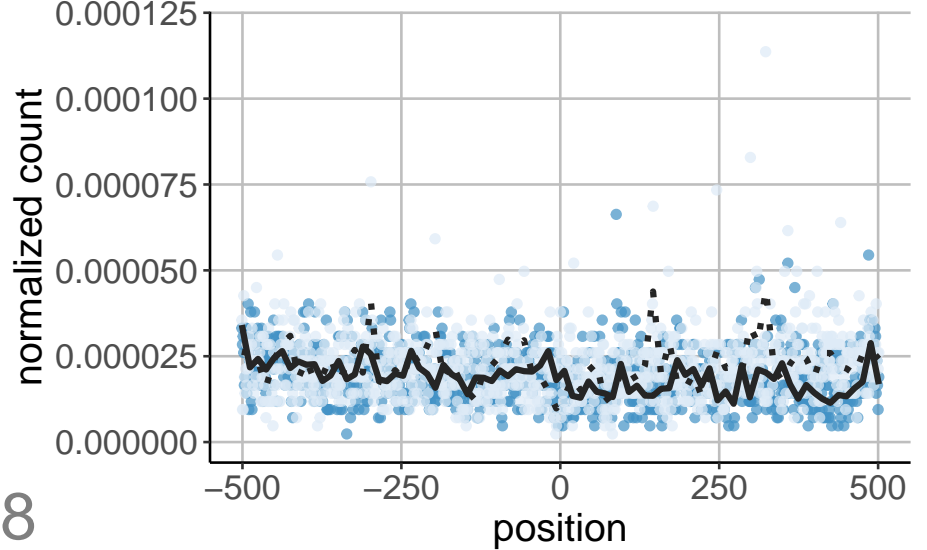

TSS

CSTF2T-CGUAGCGUCU

•• antisense — sense    • antisense • sense

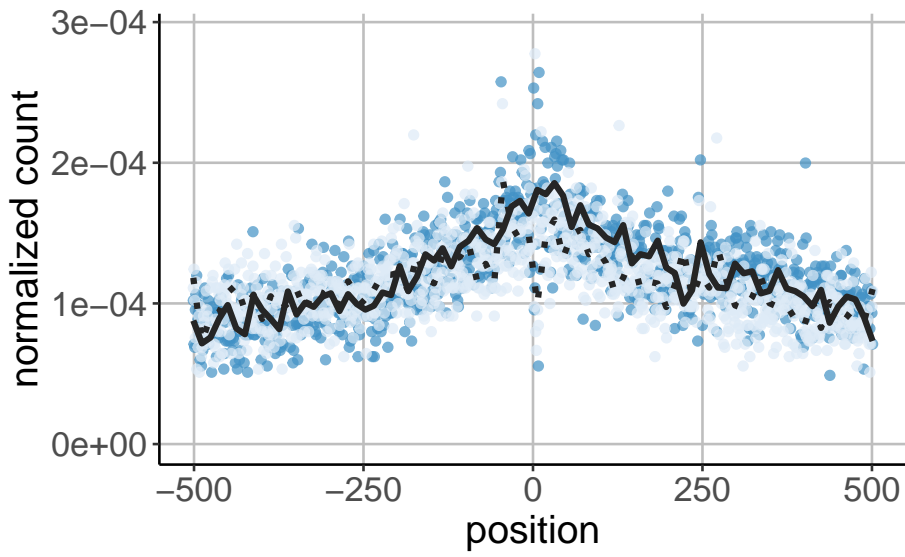

SNRNP70-GNUCANGNNG

•• antisense — sense    • antisense • sense

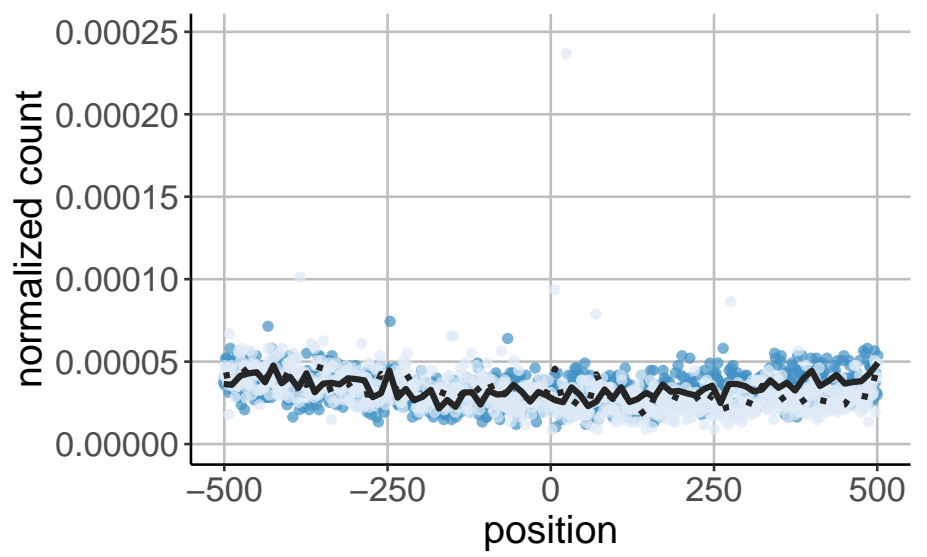

SNRNP70-GUUCAAGGUG

•• antisense — sense    • antisense • sense

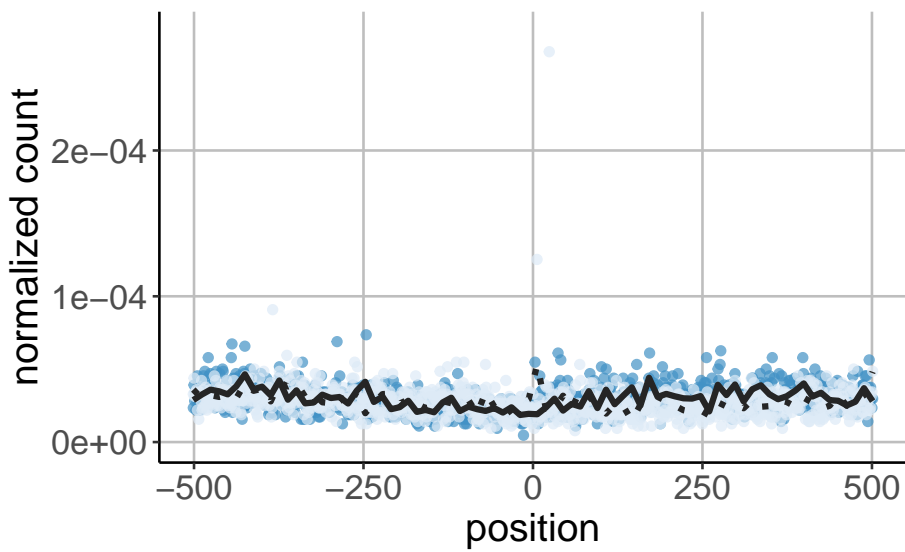

DAZ4-GYUCUAGUUAGYAUC

•• antisense — sense    • antisense • sense

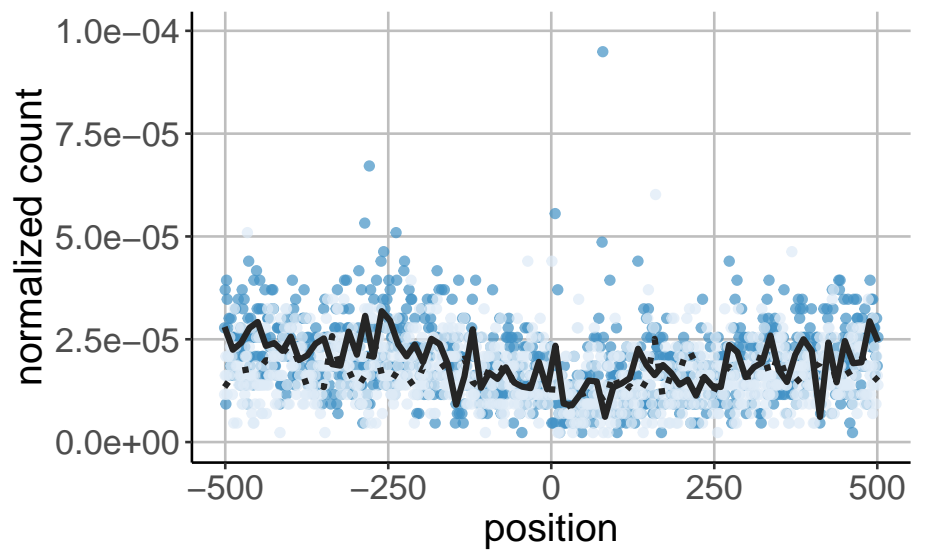

IGF2BP1-CAGNUWCA

•• antisense — sense    • antisense • sense

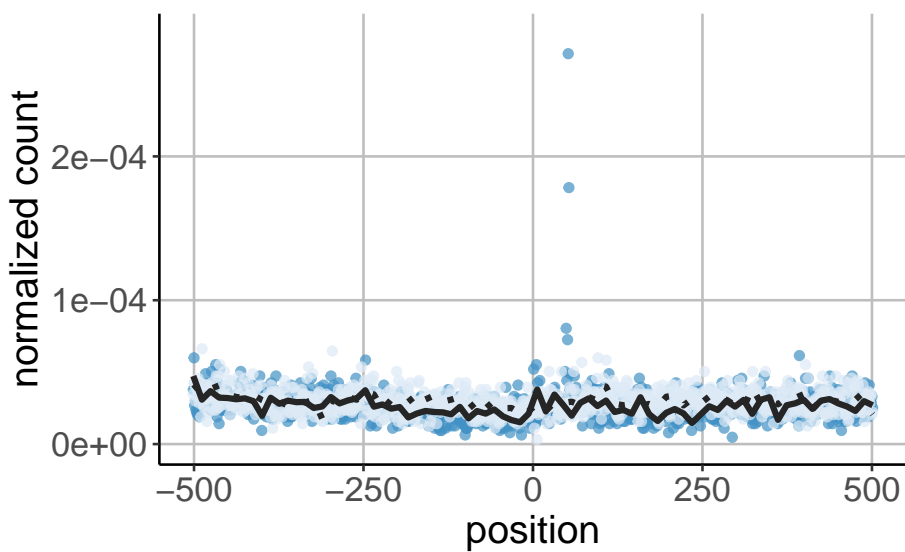

HEXIM2-NGCGACGGKN

•• antisense — sense    • antisense • sense

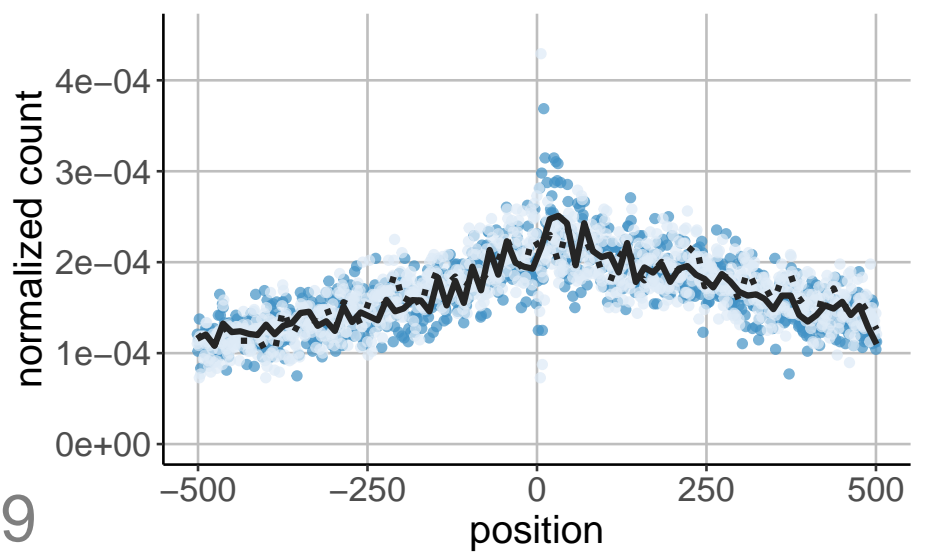

9

TSS

YBX1-NUAACAUCGGG

•• antisense — sense    • antisense • sense

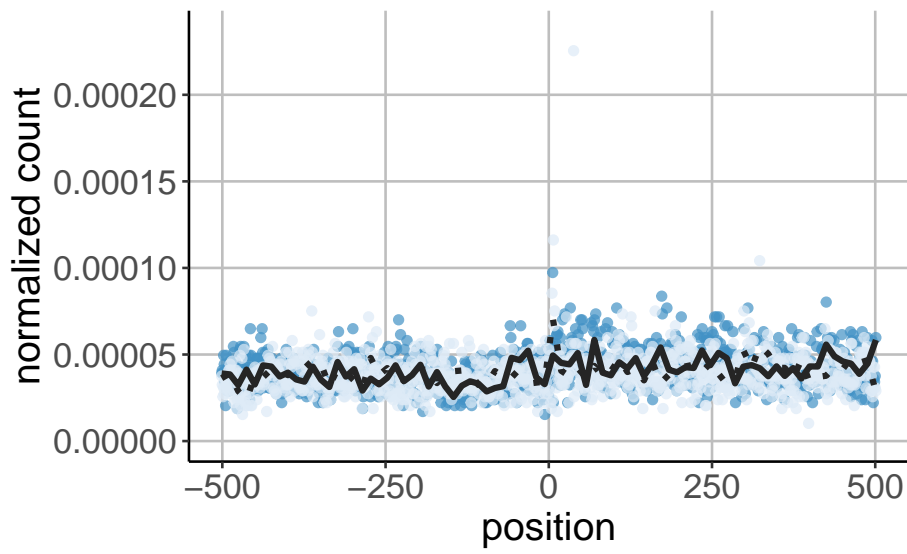

RBM24-GUGUGNGUGUG

•• antisense — sense    • antisense • sense

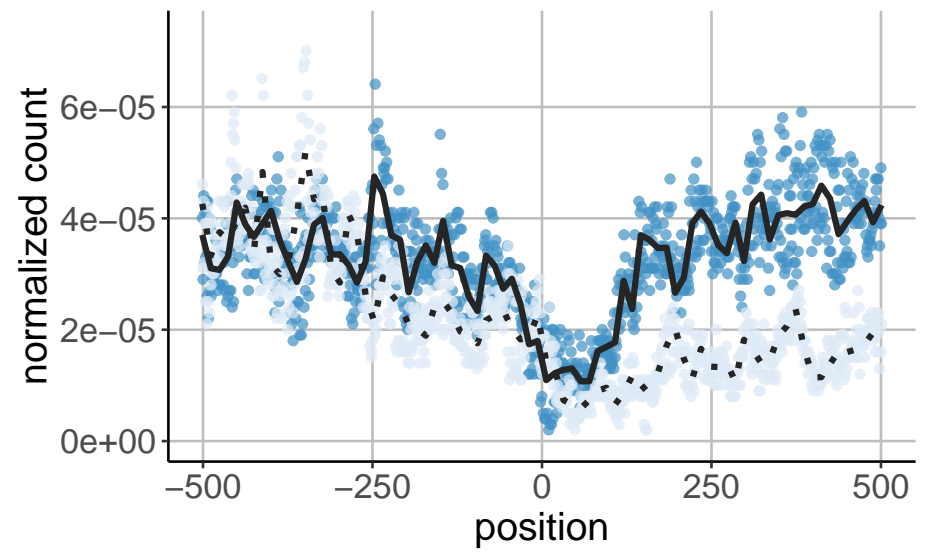

CSDA-UAACAUCA

•• antisense — sense    • antisense • sense

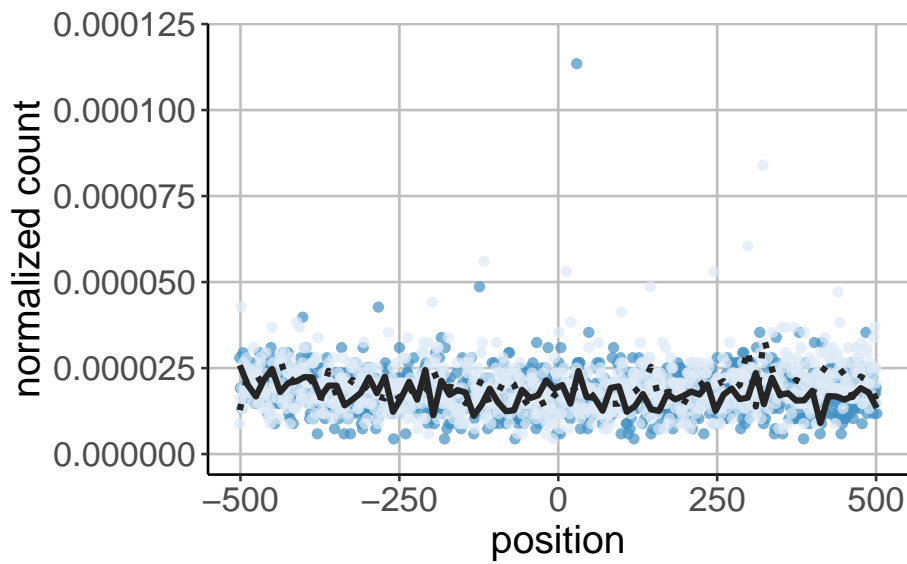

HNRNPA1L2-NUAGGUUAGGGW

•• antisense — sense    • antisense • sense

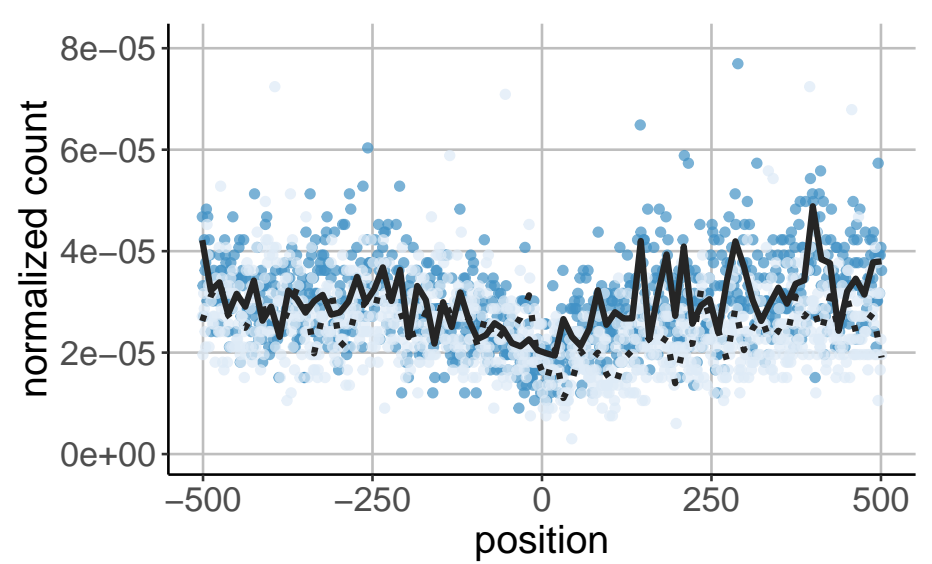

ZC3H12B-NGCGNCAGUCGGUAGCN

•• antisense — sense    • antisense • sense

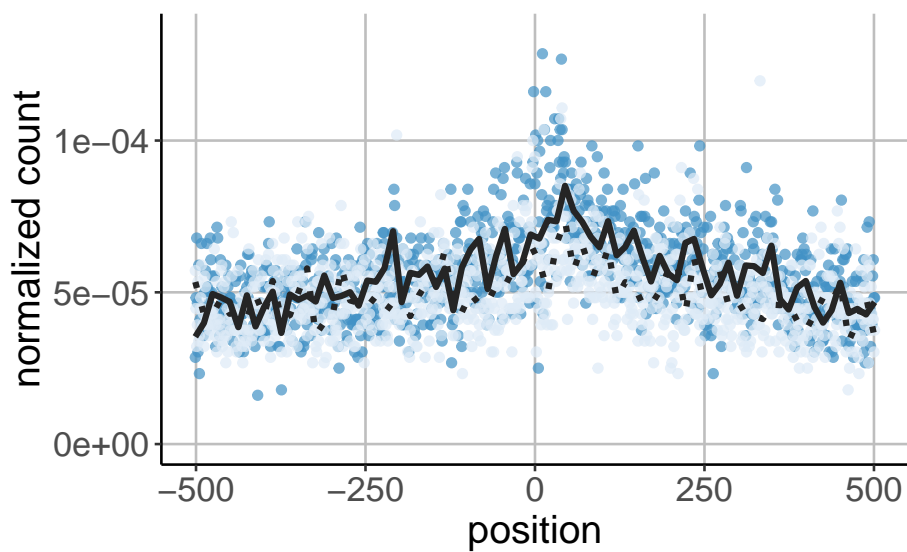

ZC3H12A-NUUGCCAWAGUKU

•• antisense — sense    • antisense • sense

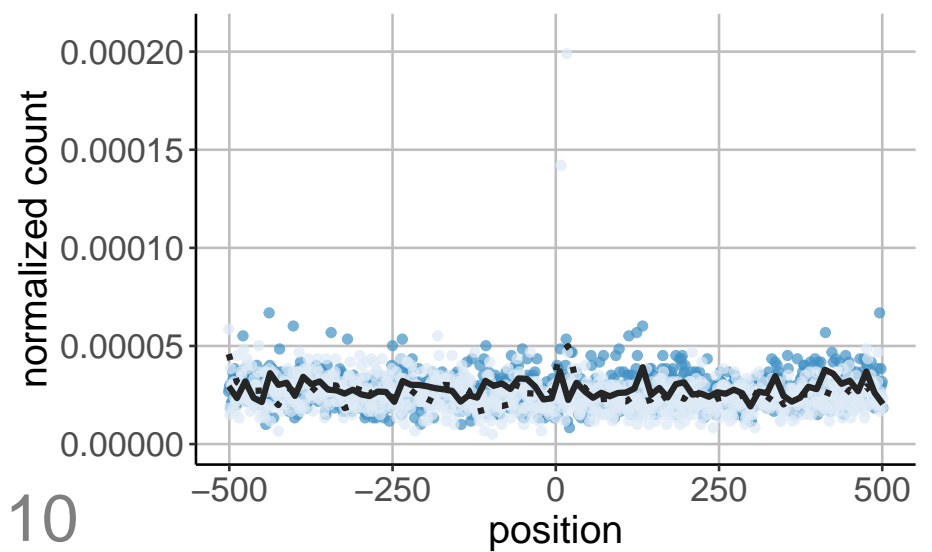

10

TSS

DAZAP1-UUAGGUUAGG

•• antisense — sense    • antisense • sense

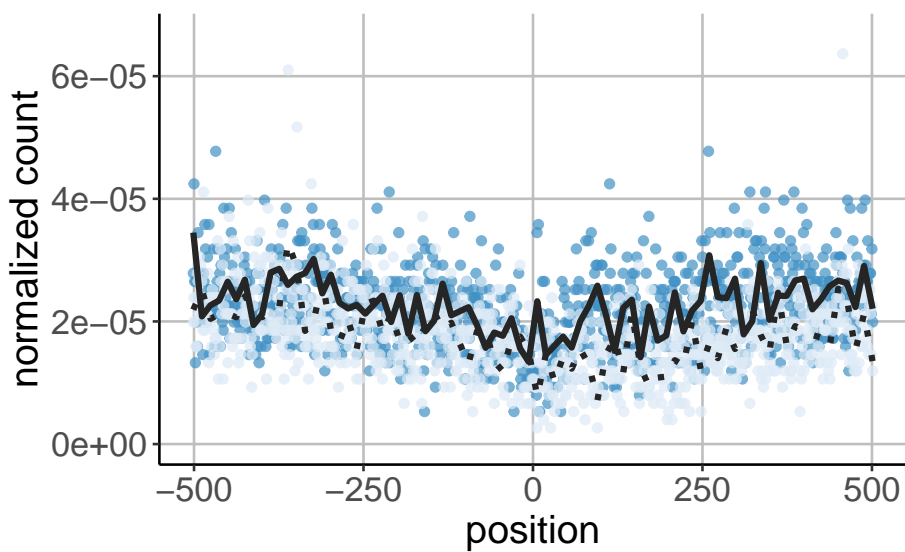

CARHSP1-GCCAUGAUGAU

•• antisense — sense    • antisense • sense

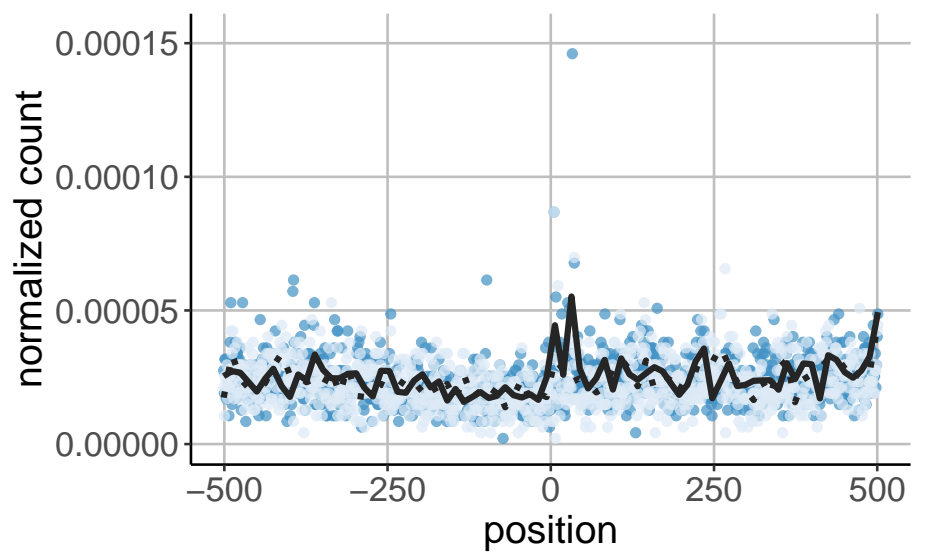

CARHSP1-UUGCCUUGUCCCGAU

•• antisense — sense    • antisense • sense

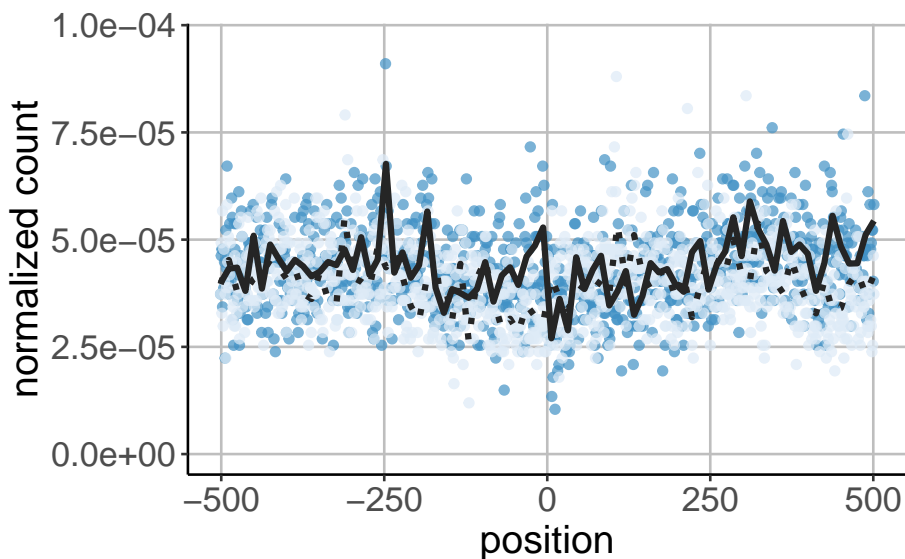

RNPC3-GGGUSUACGGGGU

•• antisense — sense    • antisense • sense

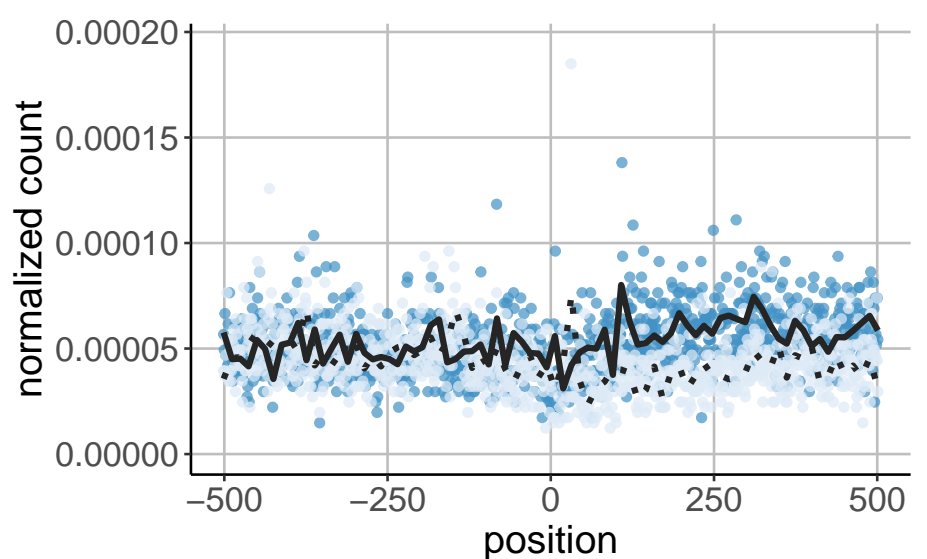

ELAVL1-UUUAUGNUUU

•• antisense — sense    • antisense • sense

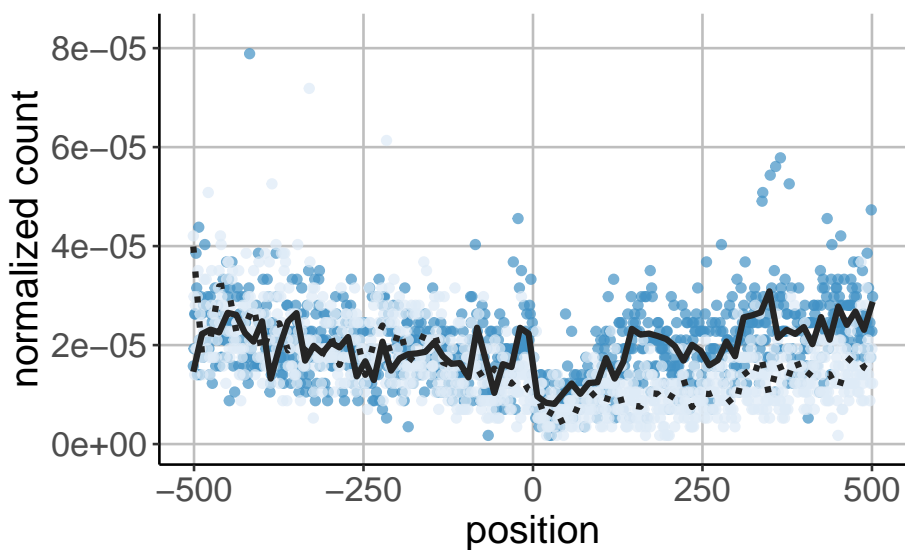

RBM46-GUGAUUG

•• antisense — sense    • antisense • sense

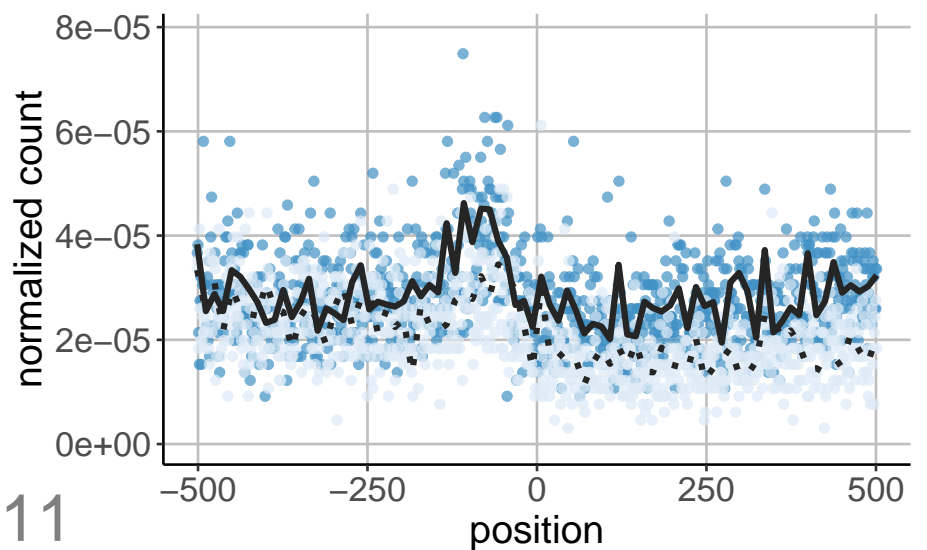

TSS

ESRP1\_3-GGUGUGGUGU

•• antisense — sense    • antisense • sense

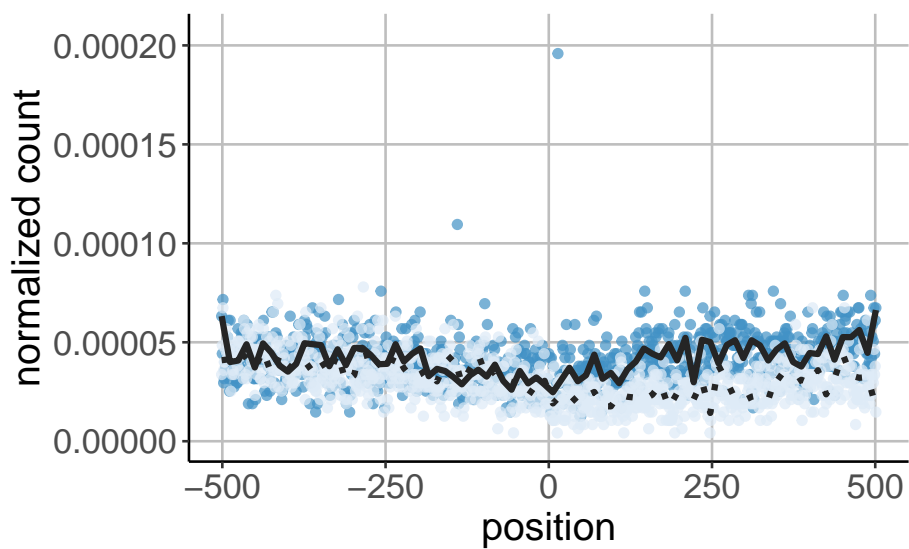

SNRPB2-GGGUGUGCAC

•• antisense — sense    • antisense • sense

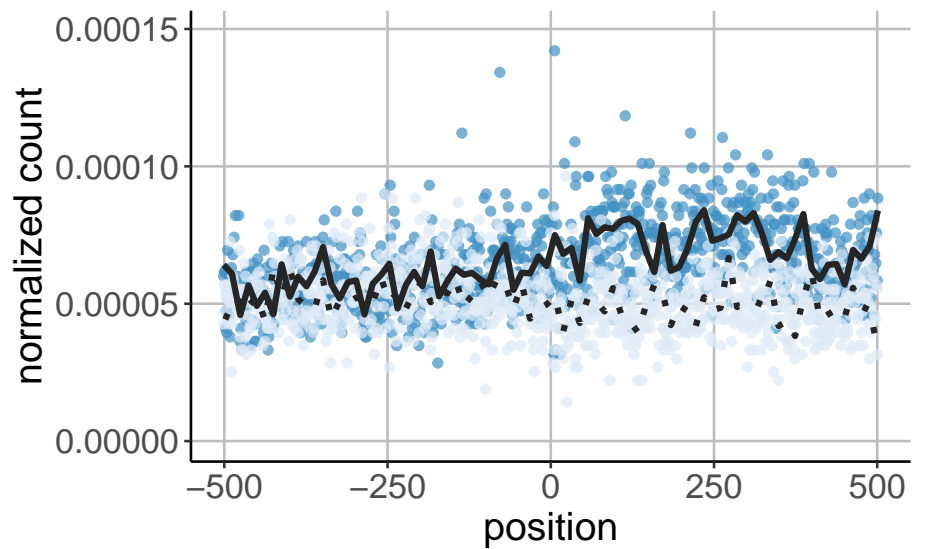

SNRPB2-NNCAUUGCACN

•• antisense — sense    • antisense • sense

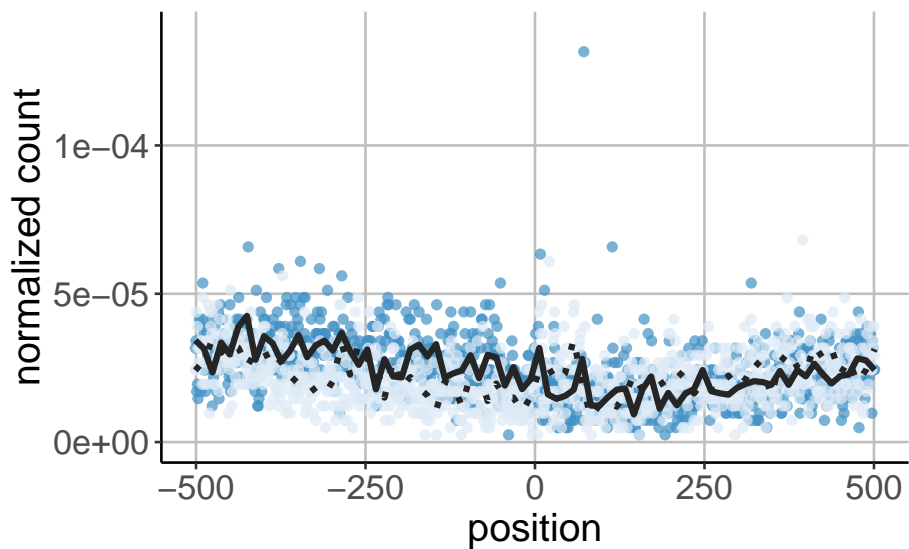

MEX3C-NNAGAGUUUAUNN

•• antisense — sense    • antisense • sense

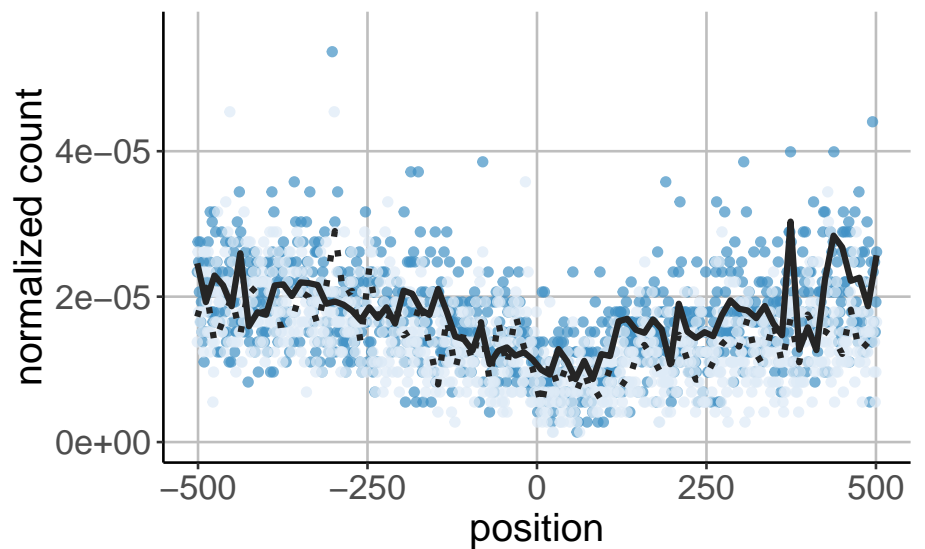

HNRNPA0-KUAGKUUAGGK

•• antisense — sense    • antisense • sense

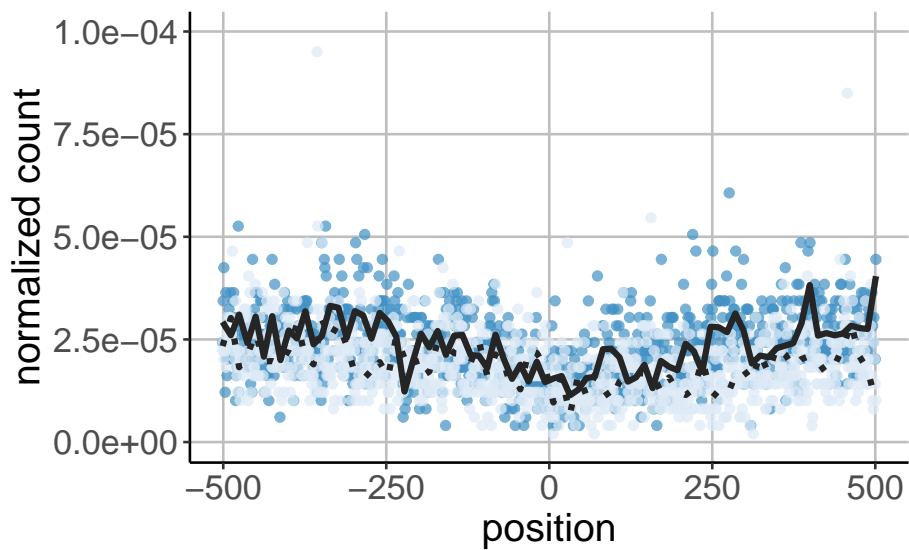

HNRNPA0-KUAGKUUUAGGK

•• antisense — sense    • antisense • sense

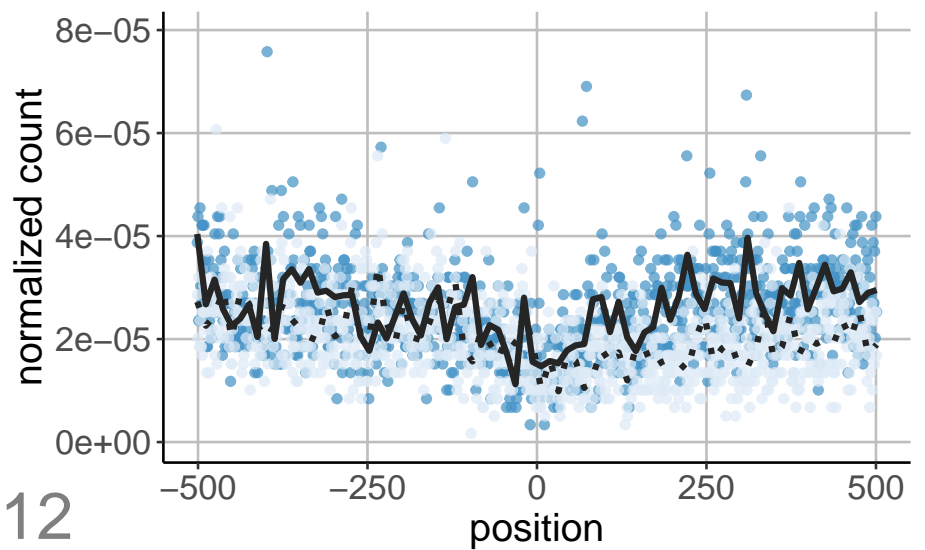

12

TSS

SNRPA-CAUUGCACN

•• antisense — sense    • antisense • sense

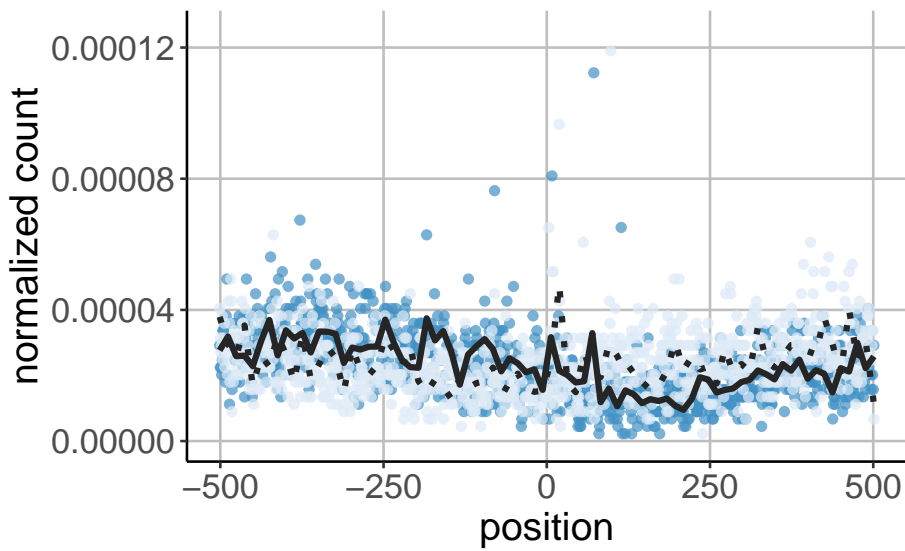

SNRPA-NUGCACR

•• antisense — sense    • antisense • sense

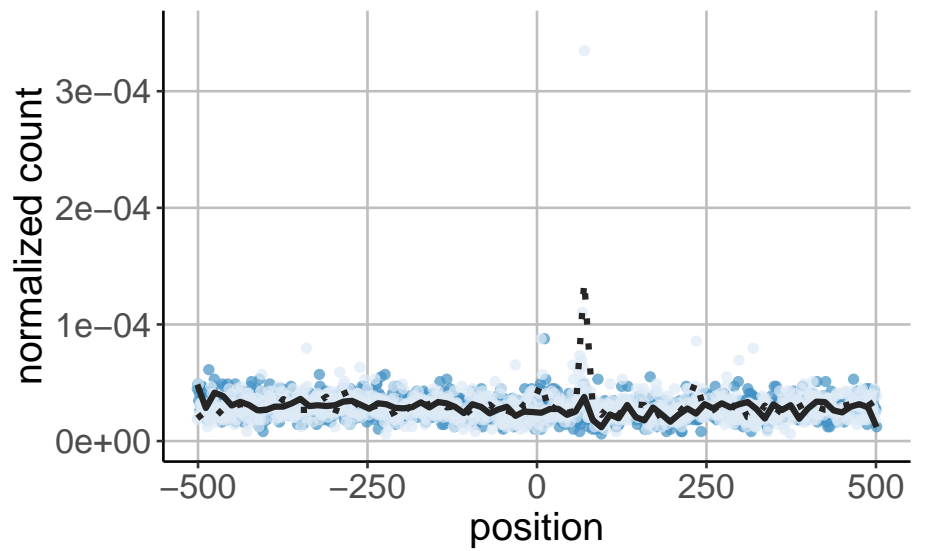

MEX3B\_3-UAGAGUUUAA

•• antisense — sense    • antisense • sense

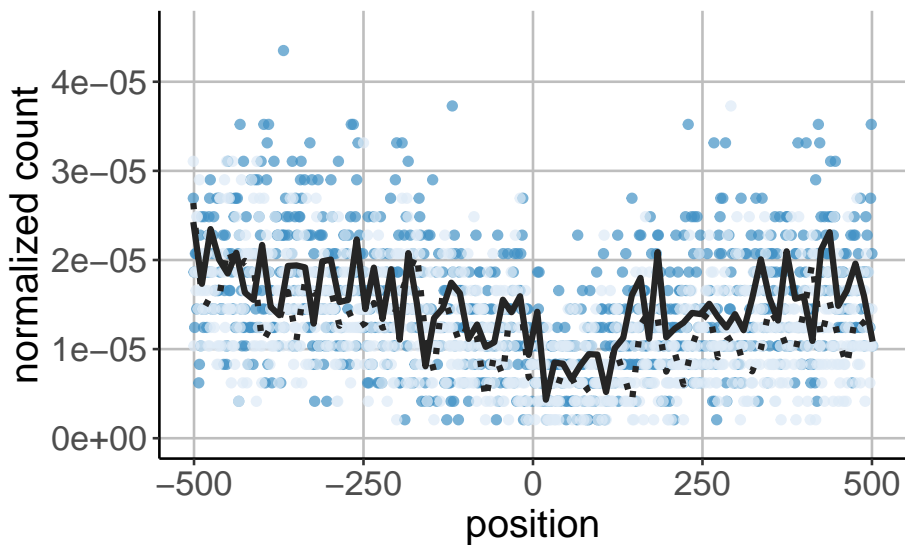

MEX3B\_3-UAUUUAAU

•• antisense — sense    • antisense • sense

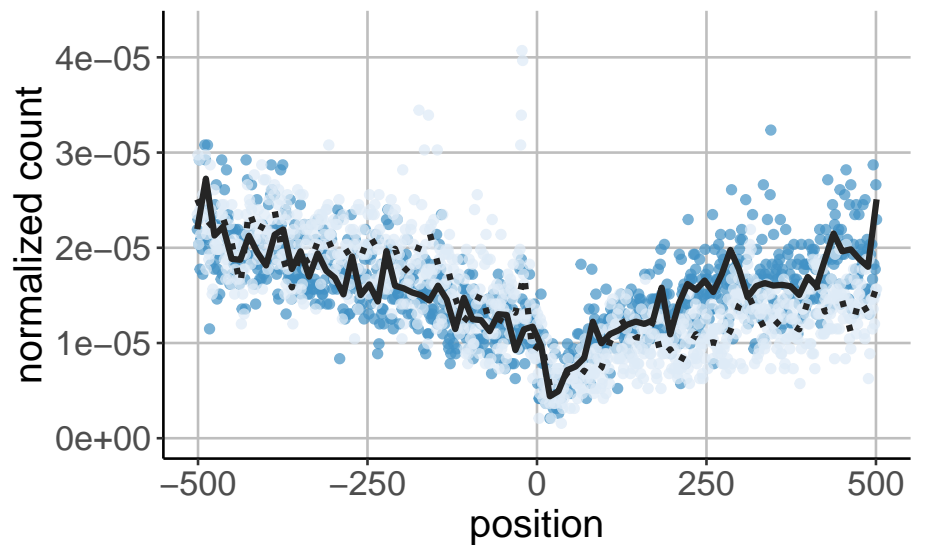

KHDRBS2-UAAACAAUAA

•• antisense — sense    • antisense • sense

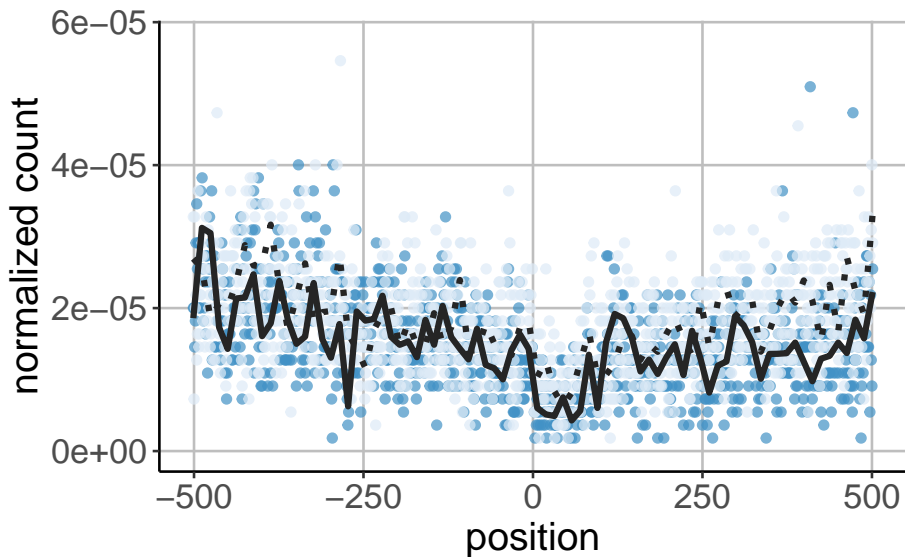

CELF3\_2-UGUGUNUGUGU

•• antisense — sense    • antisense • sense

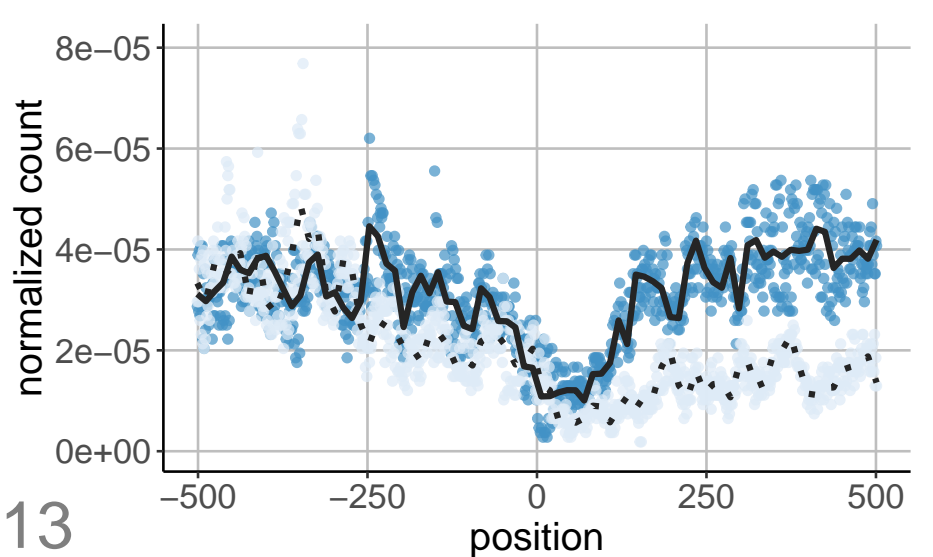

13

TSS

RNPC3-GGGDDGGGDKUACKKGGK

•• antisense — sense    • antisense • sense

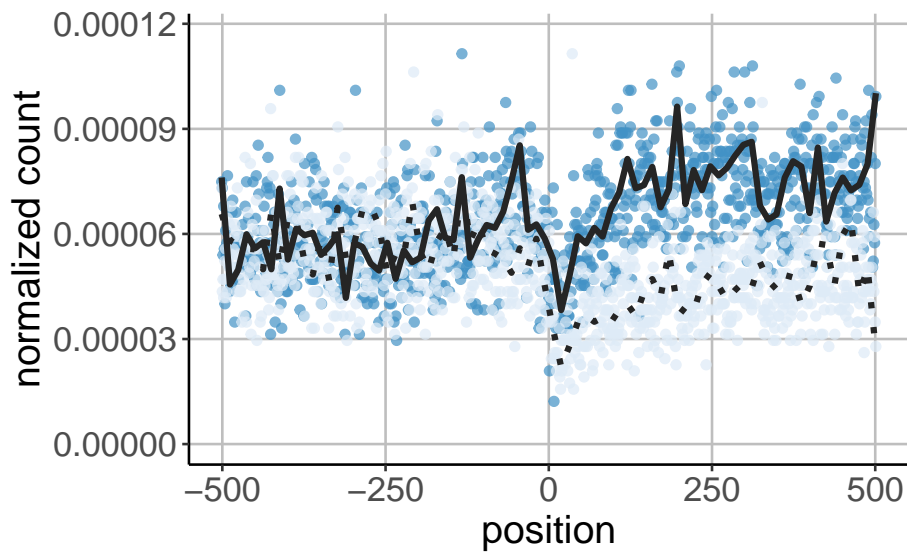

RBM14-UGCGUCG

•• antisense — sense    • antisense • sense

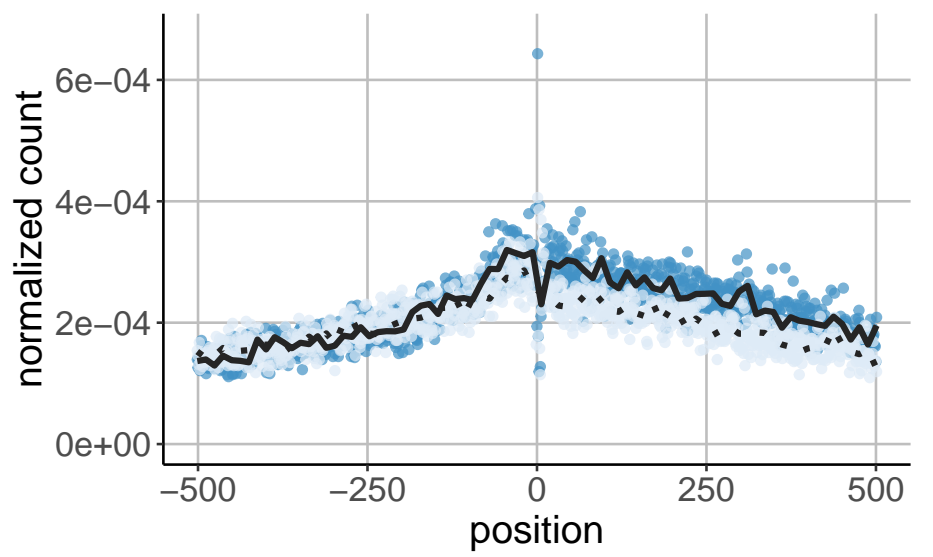

CELF4-UGUGUUGUGU

•• antisense — sense    • antisense • sense

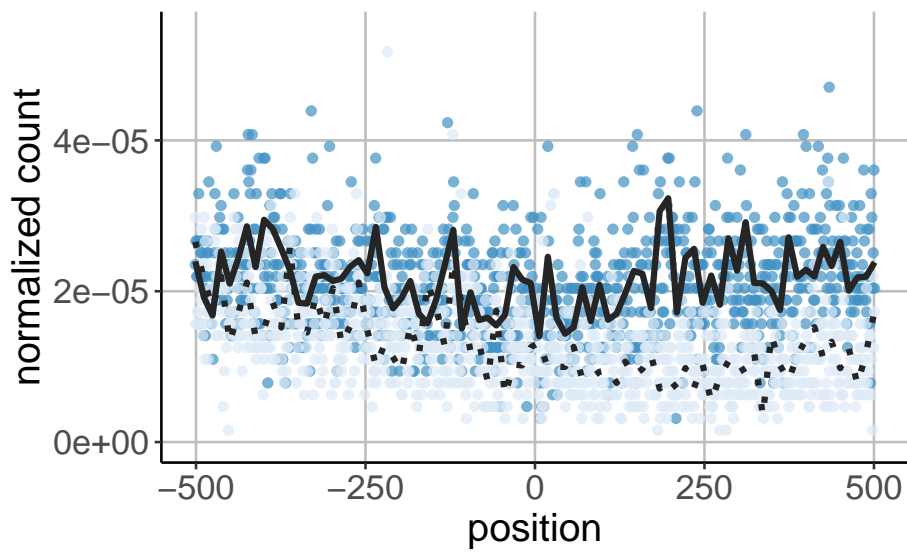

ZRANB2-NNNGGUAAGGUNN

•• antisense — sense    • antisense • sense

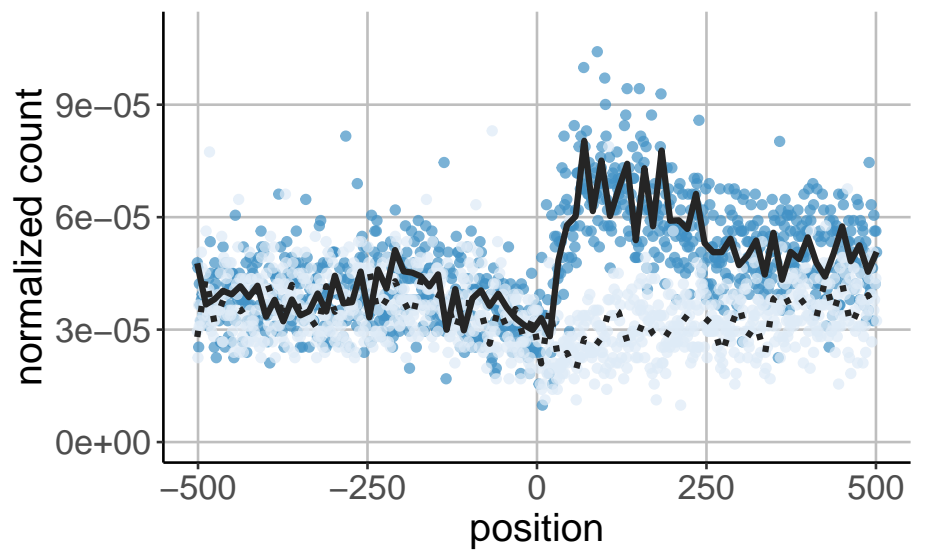

RBM4-CGGGGURUGN

•• antisense — sense    • antisense • sense

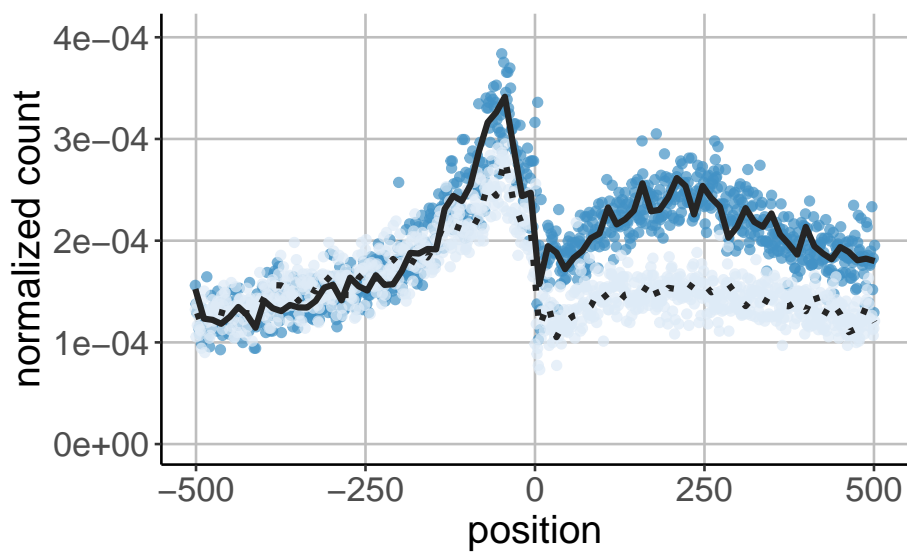

BPMS-NAGGCACR

•• antisense — sense    • antisense • sense

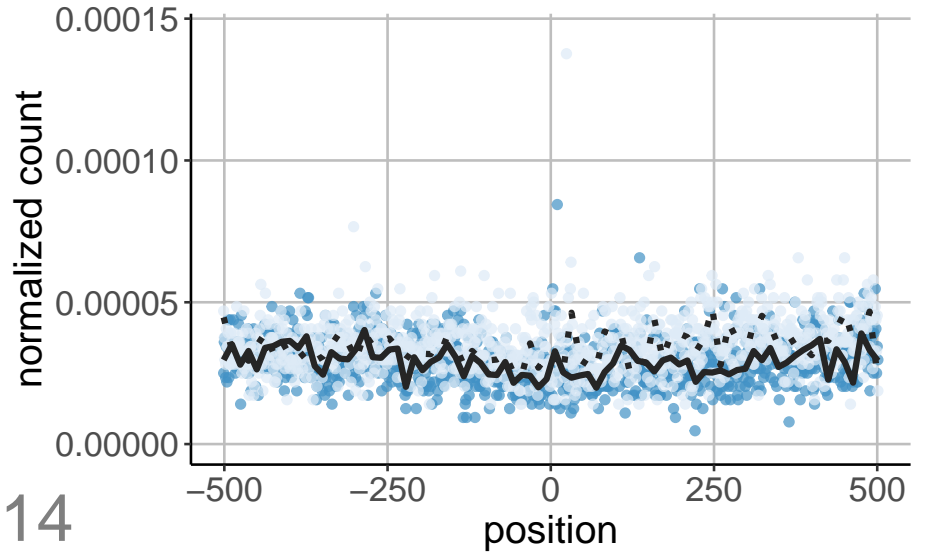

TSS

RBPMS-UCACGNGCACN

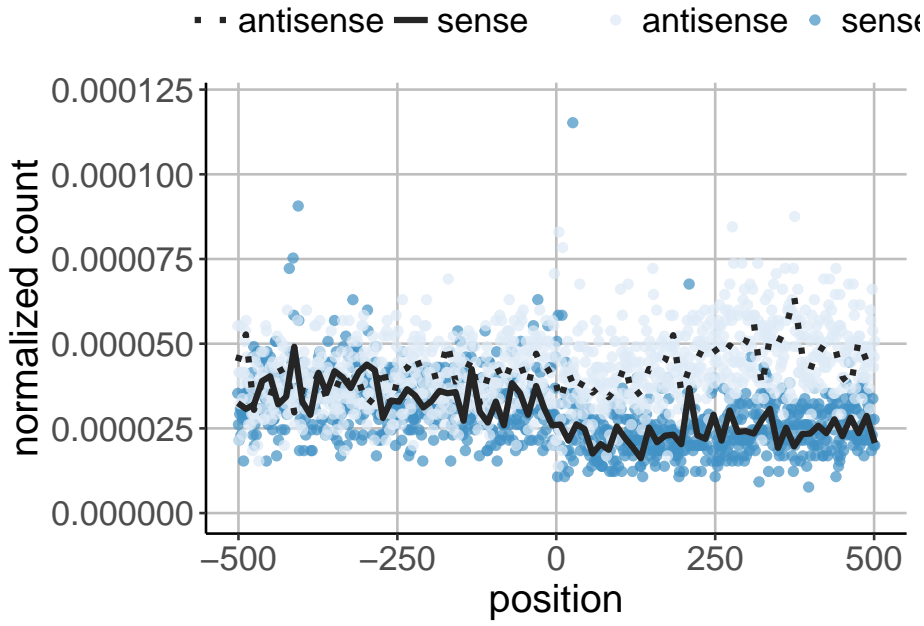

CELF1\_2-UGUGUNUGUGU

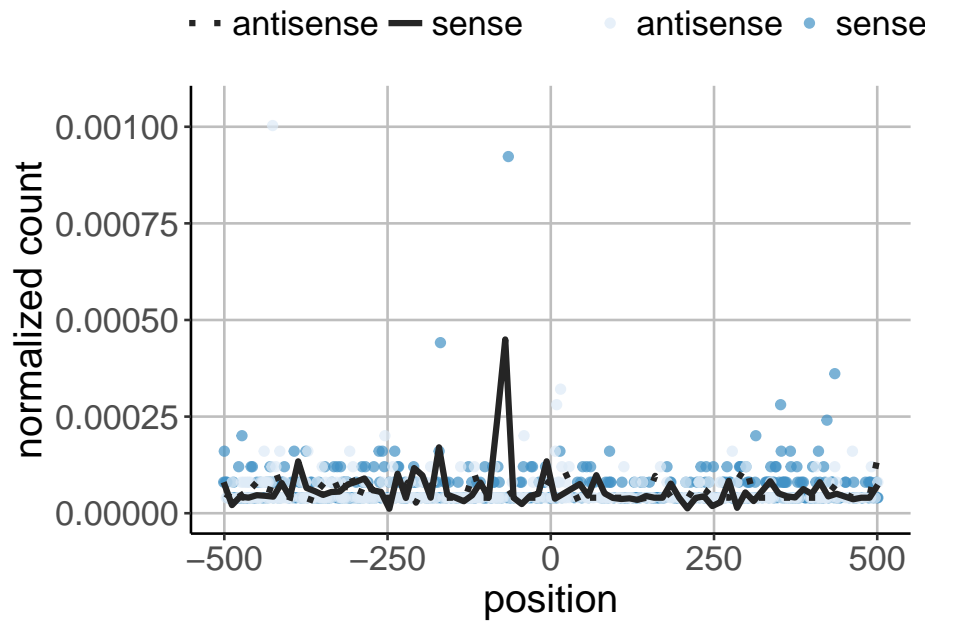

CSTF2-RRGGCGUAGCGUNN

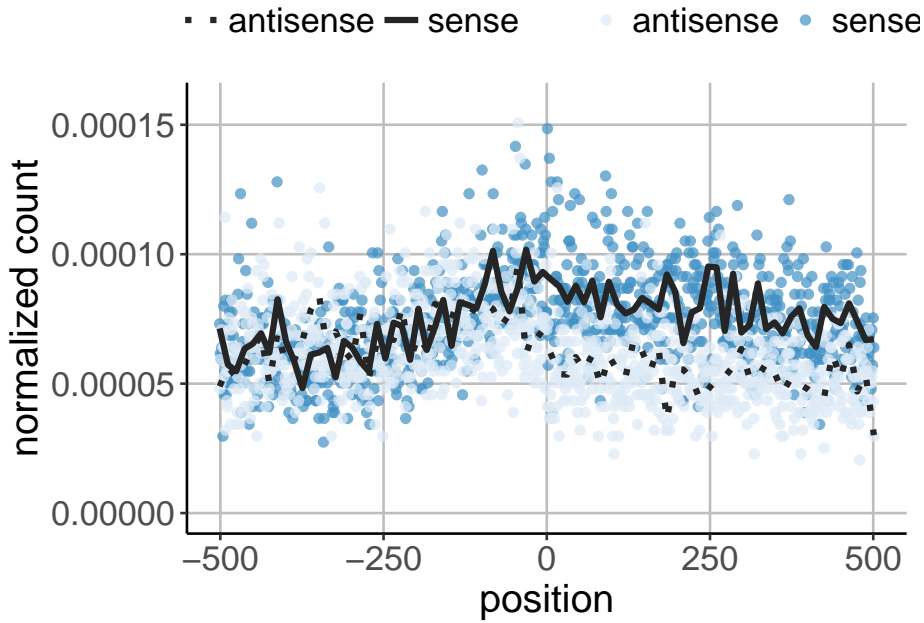

RBM28-GRGGCCGNGCGGUGG

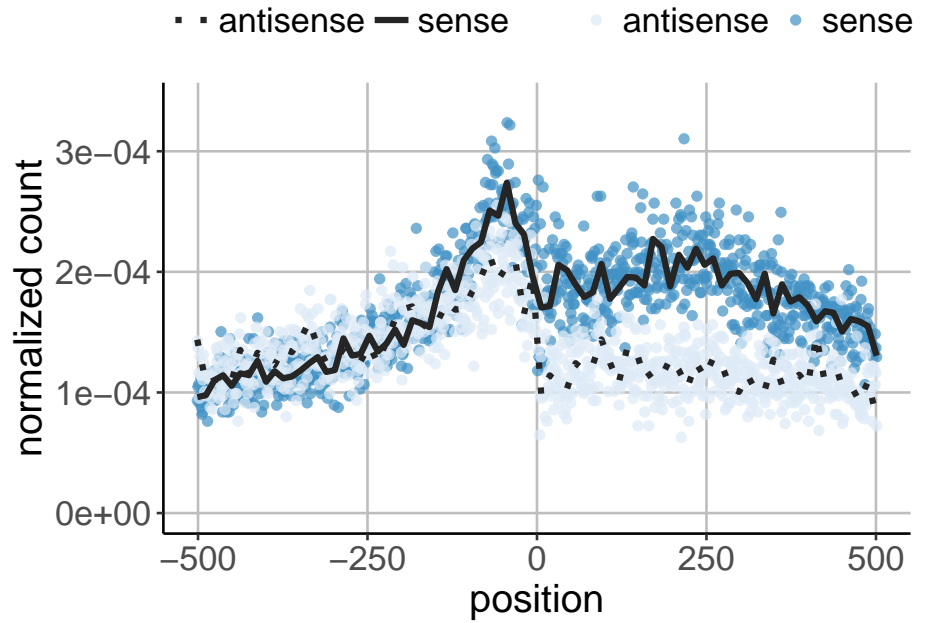

RBM28-GUGGGUCUCGG

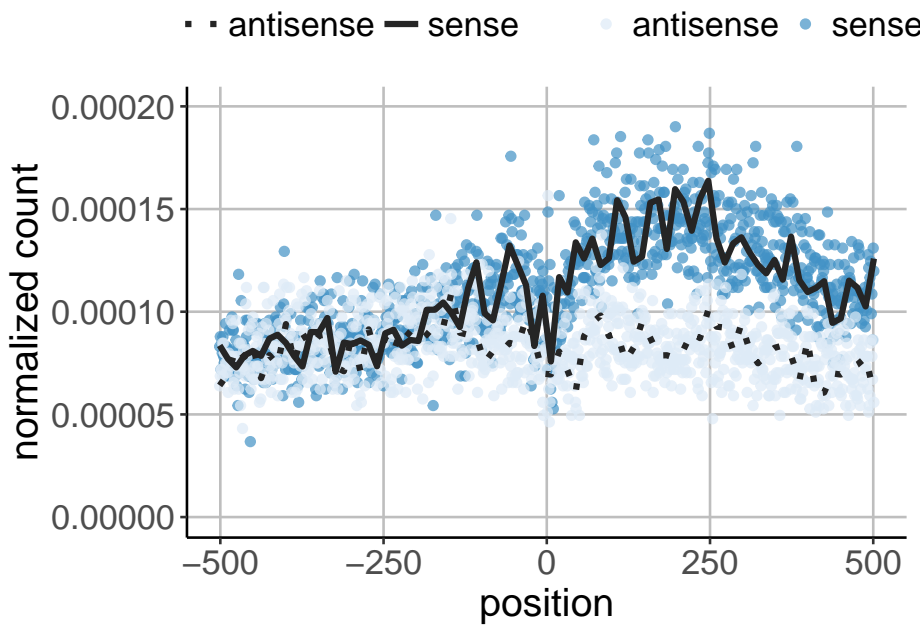

ZC3H10-GCGCAUGCGNN

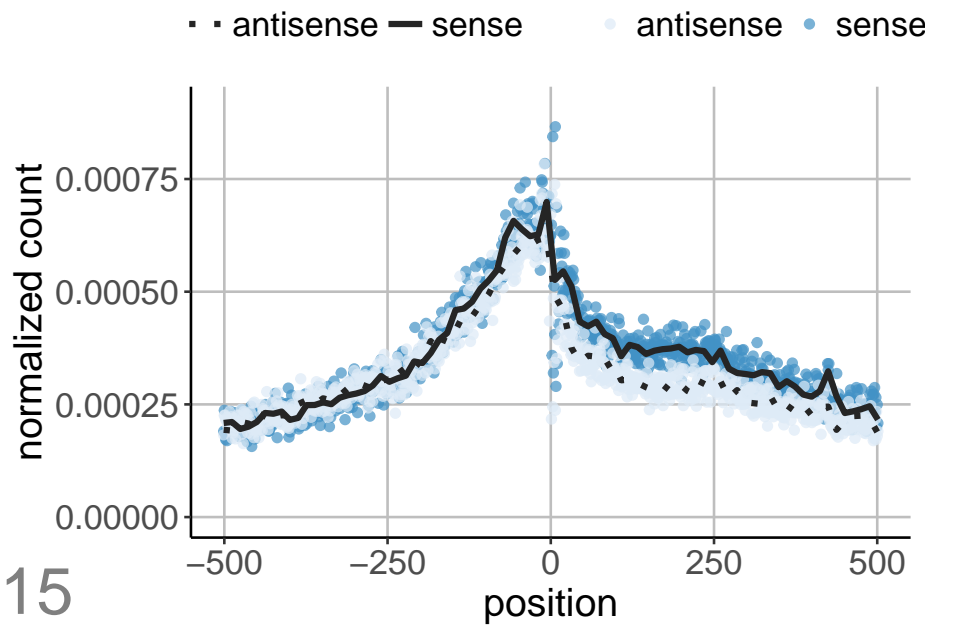

15



TSS

ZC3H10-NGCGCAGCGUN

•• antisense — sense    • antisense • sense

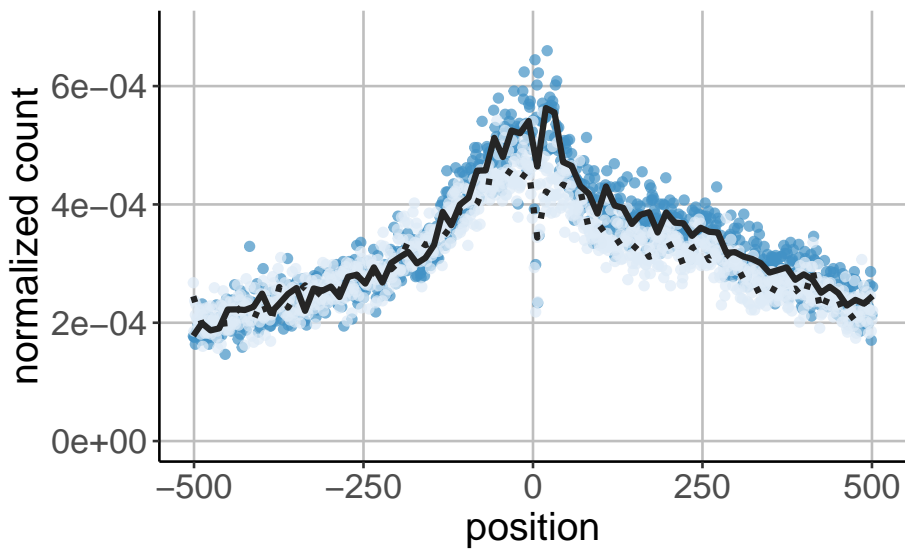

RBFOX1\_2-GCAUGNNGCAUG

•• antisense — sense    • antisense • sense

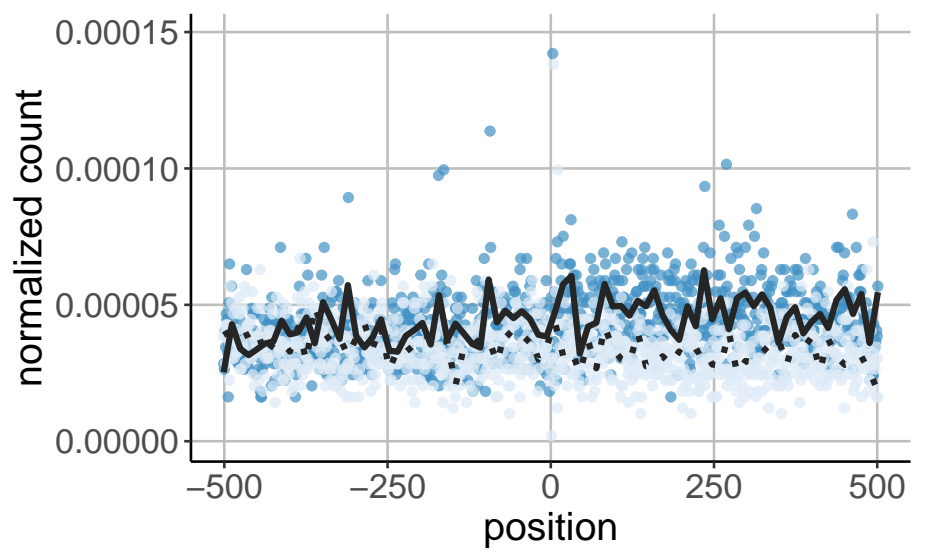

MSI1-KUAGUWKUAGK

•• antisense — sense    • antisense • sense

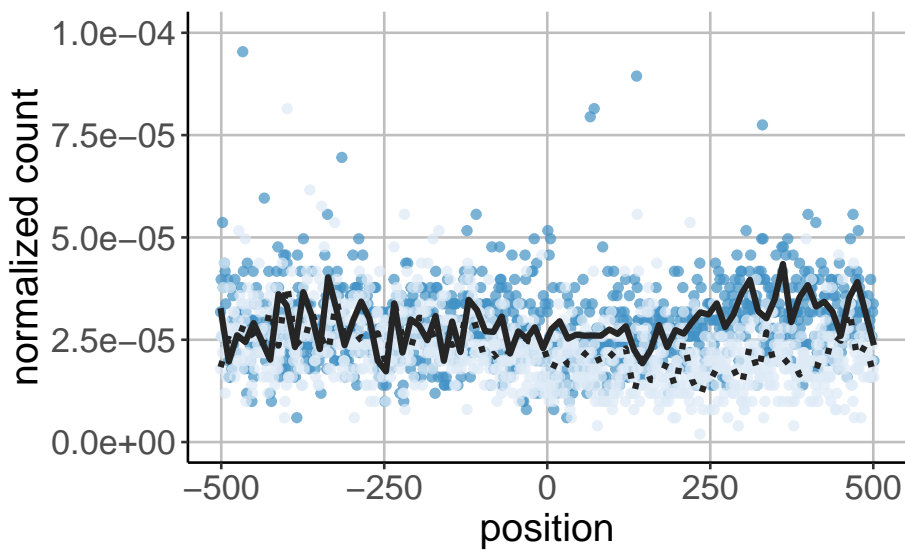

HEXIM1-GKDKCGACGGK

•• antisense — sense    • antisense • sense

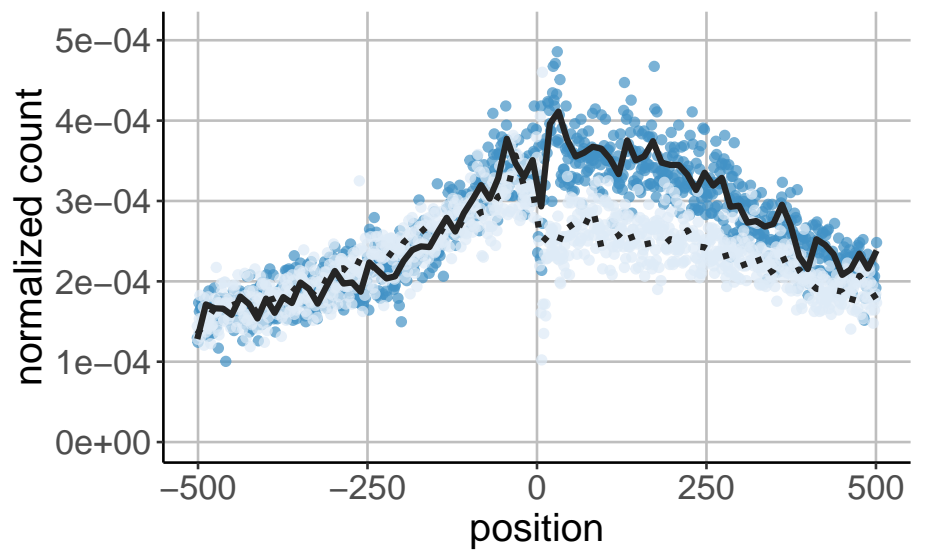

SART3-NGUUAGCRK

•• antisense — sense    • antisense • sense

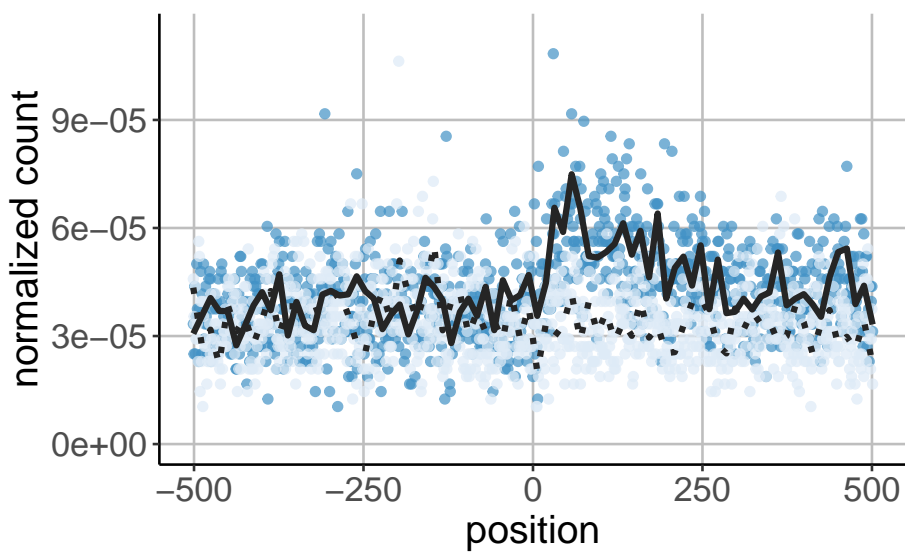

MSI2-GUAGUGDGUAGK

•• antisense — sense    • antisense • sense

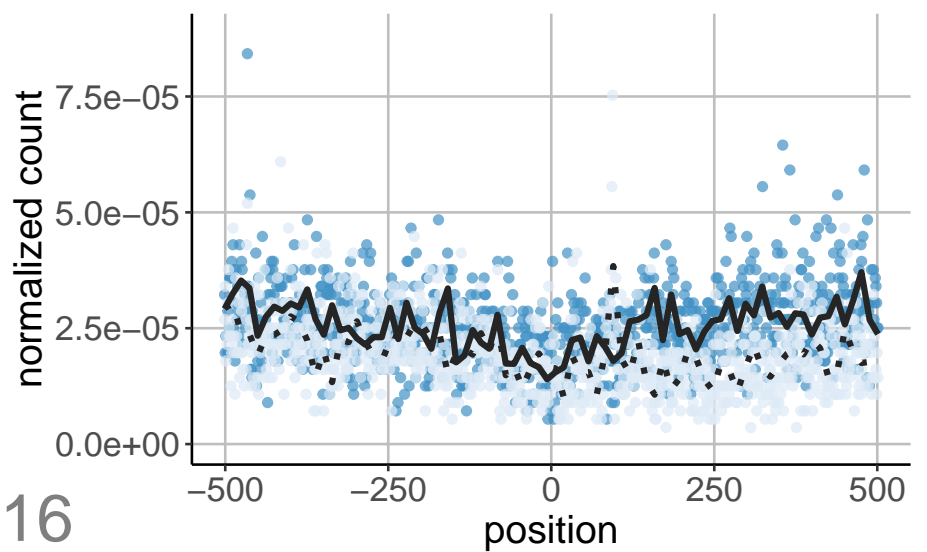

16

TSS

MSI2-GUAGUNNNGUAGK

•• antisense — sense    • antisense • sense

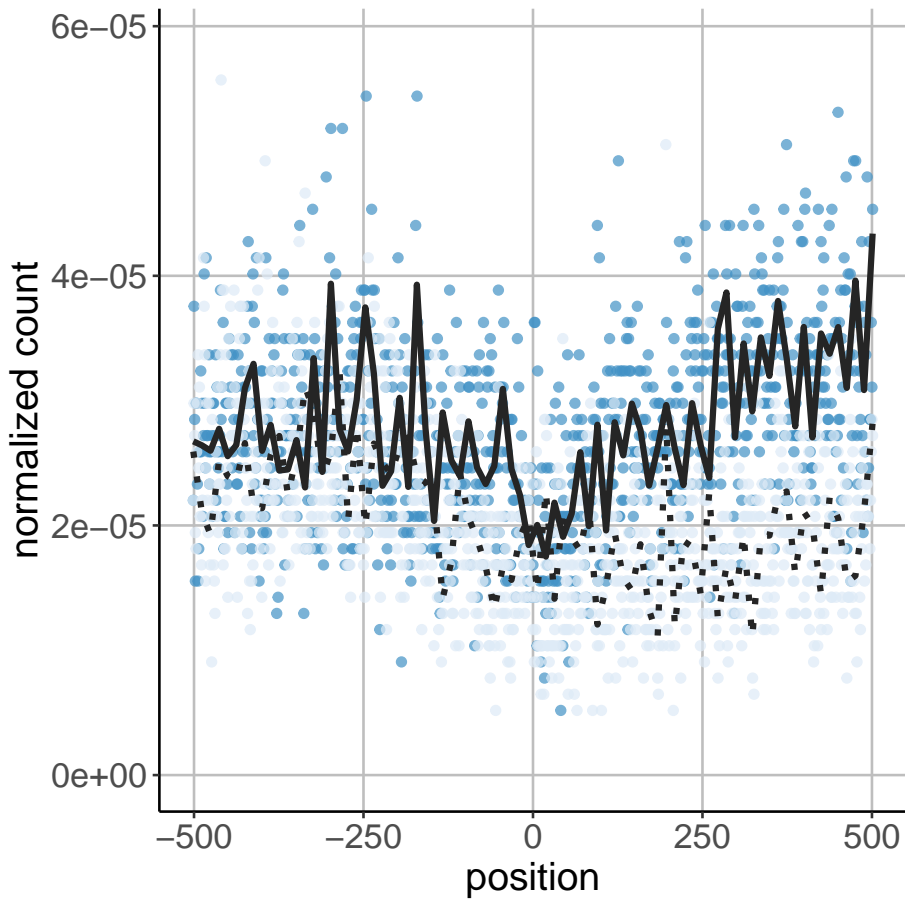

ZCRB1-GNNUUAACK

•• antisense — sense    • antisense • sense

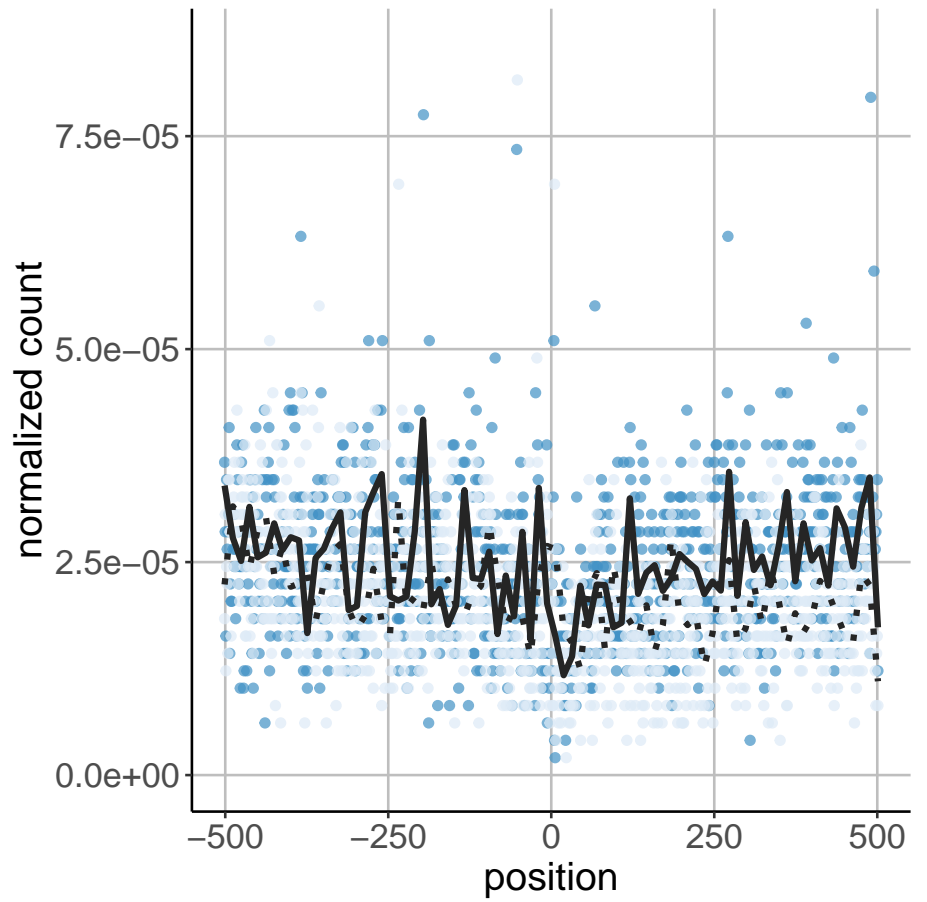

ZCRB1-GUGGACUUA

•• antisense — sense    • antisense • sense

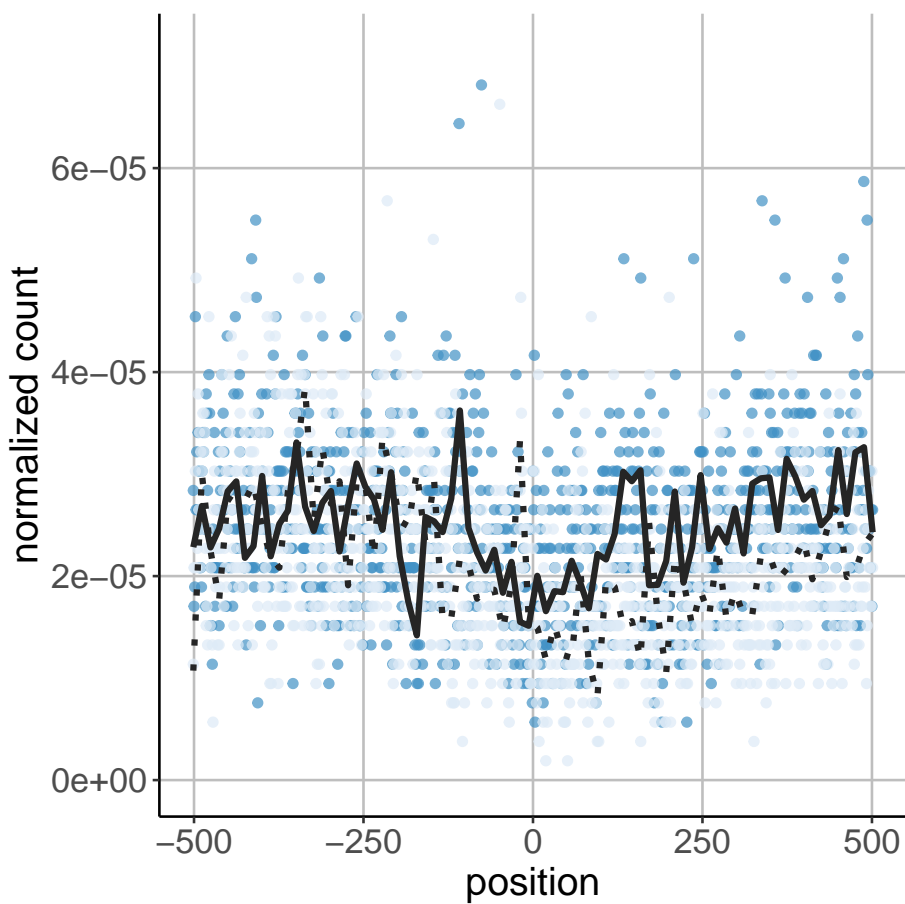

LARP6-GUGUCNNNNNNNNNGAAGUCN

•• antisense — sense    • antisense • sense

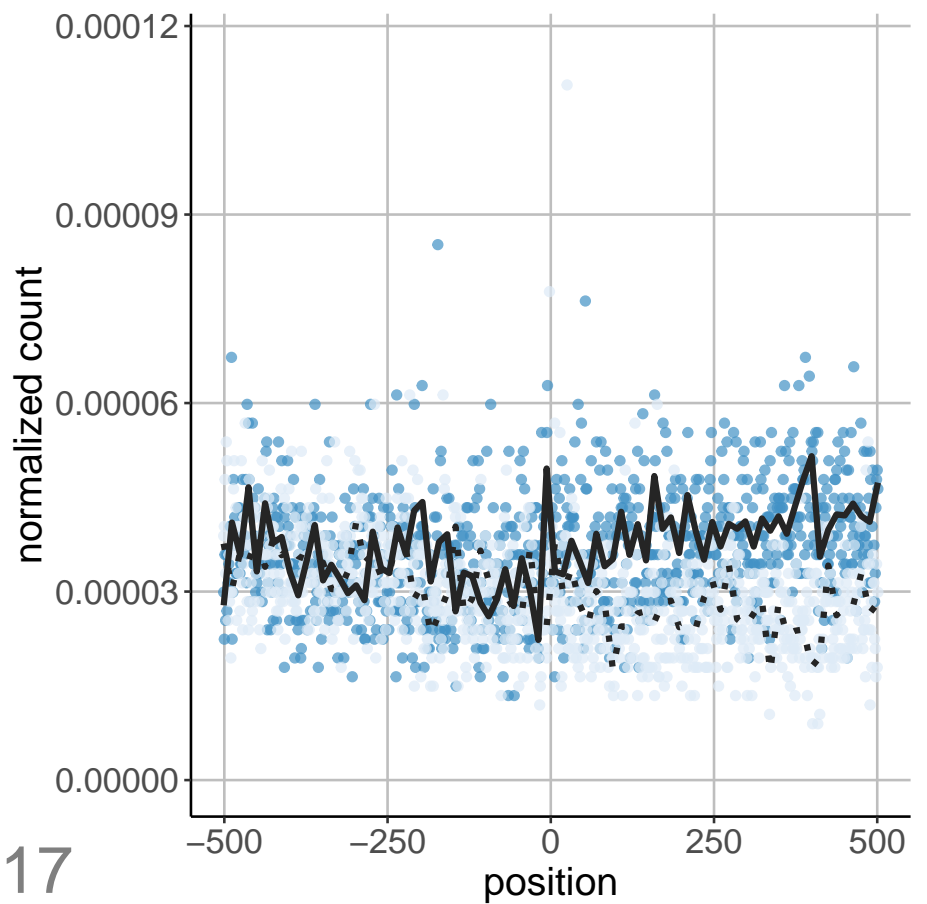

TSS

DAZ1\_2-NNUGUGUGSGUUUCCGSN

•• antisense — sense    • antisense • sense

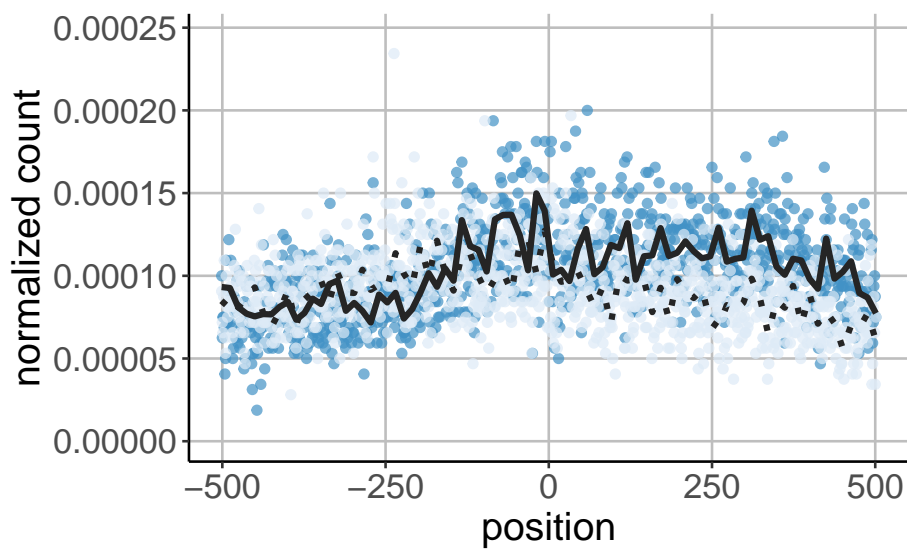

DAZ1\_2-NUGKUGUUGUAGN

•• antisense — sense    • antisense • sense

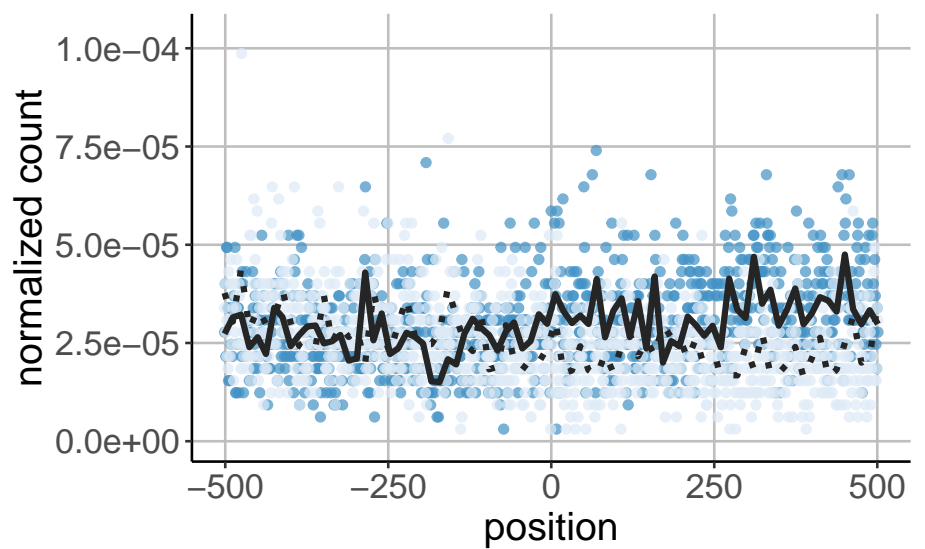

DAZ1\_2-CRNAUGUUAGUAGN

•• antisense — sense    • antisense • sense

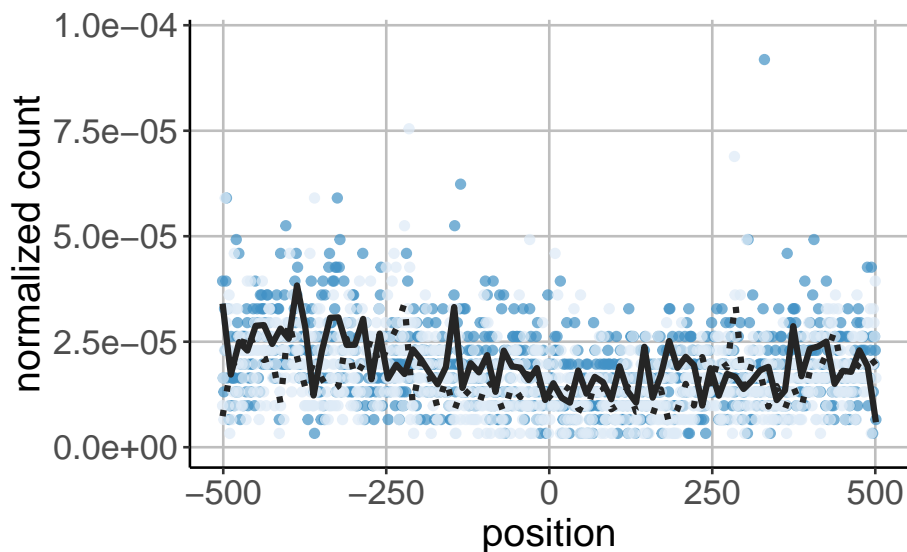

DAZ3-NNUGUGUGSGUUUCCGSN

•• antisense — sense    • antisense • sense

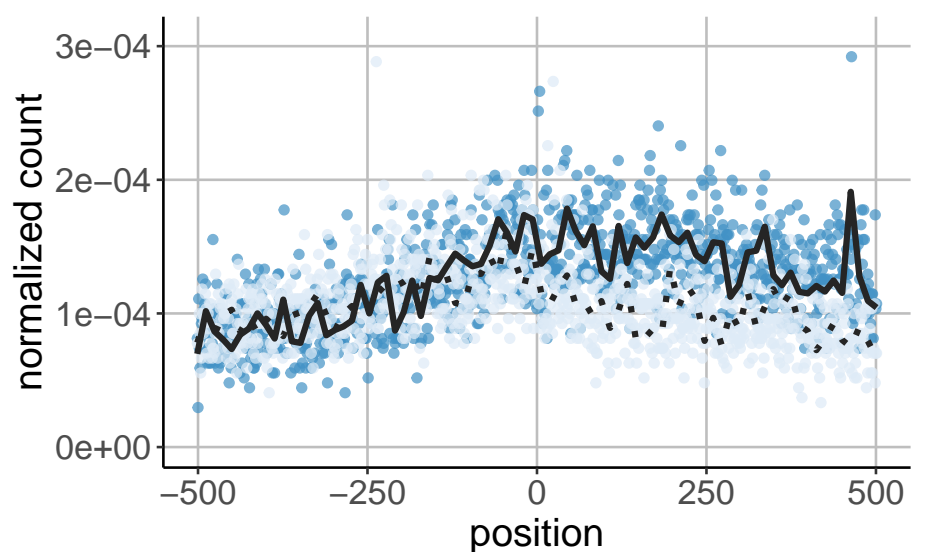

DAZ4-NNUGUGUGSGUUUCCGSN

•• antisense — sense    • antisense • sense

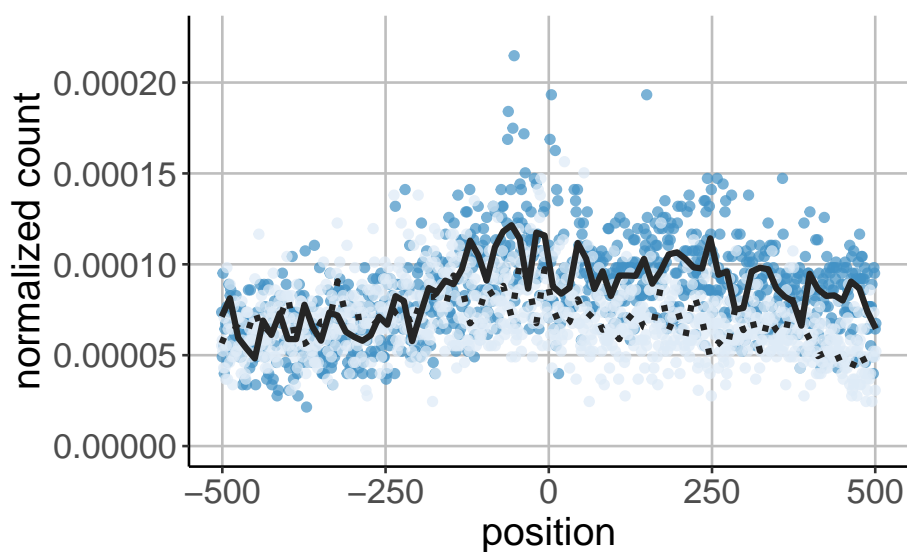

DAZ4-CUGKUGUUGUAGG

•• antisense — sense    • antisense • sense

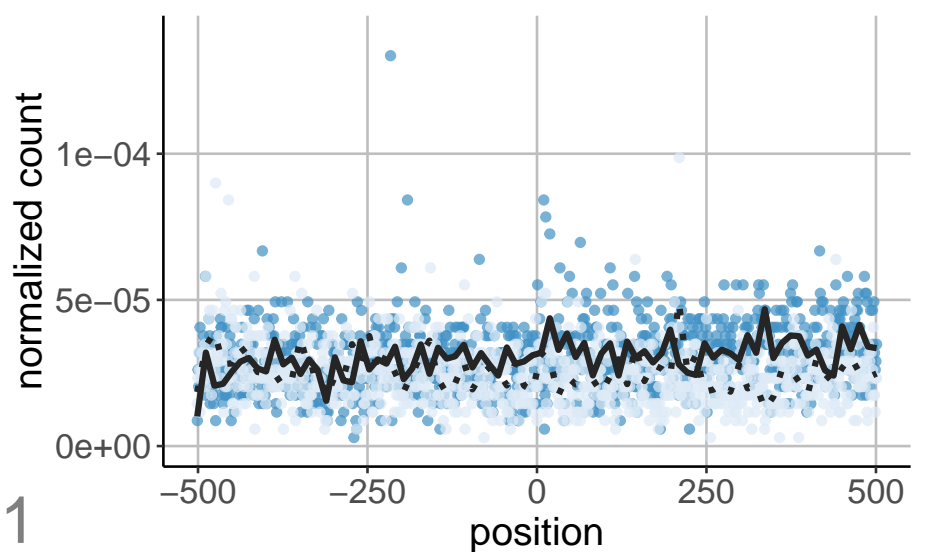

TSS

DAZL-NNUGYGUGCGUUUCCGSN

• antisense — sense    • antisense • sense

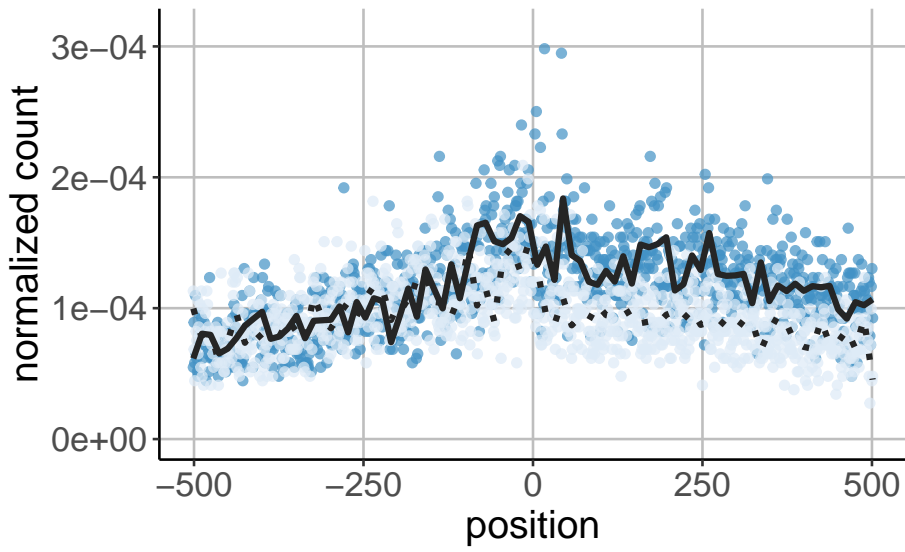

HNRNPA1-NGCAGUUUUAGGGCN

• antisense — sense    • antisense • sense

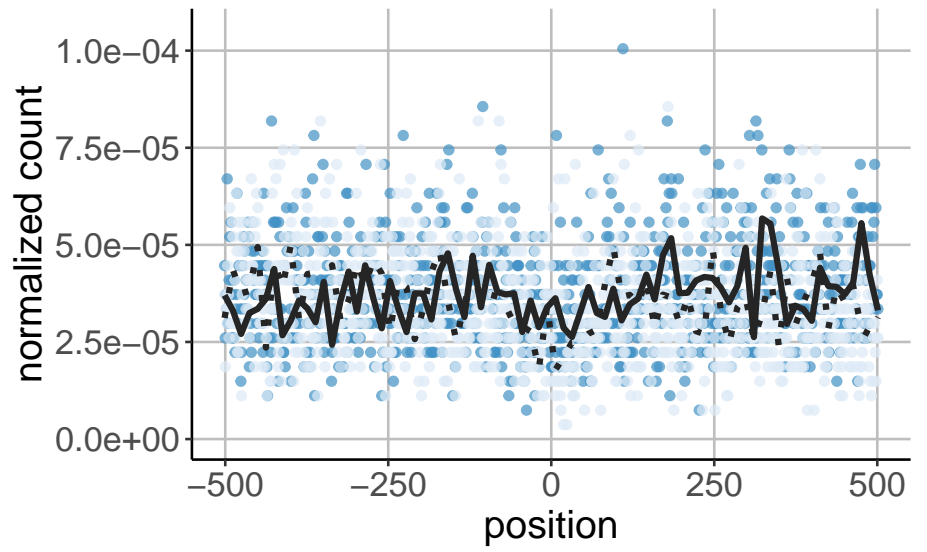

HNRNPC-NGGGUCUNAUUUUUAAN

• antisense — sense    • antisense • sense

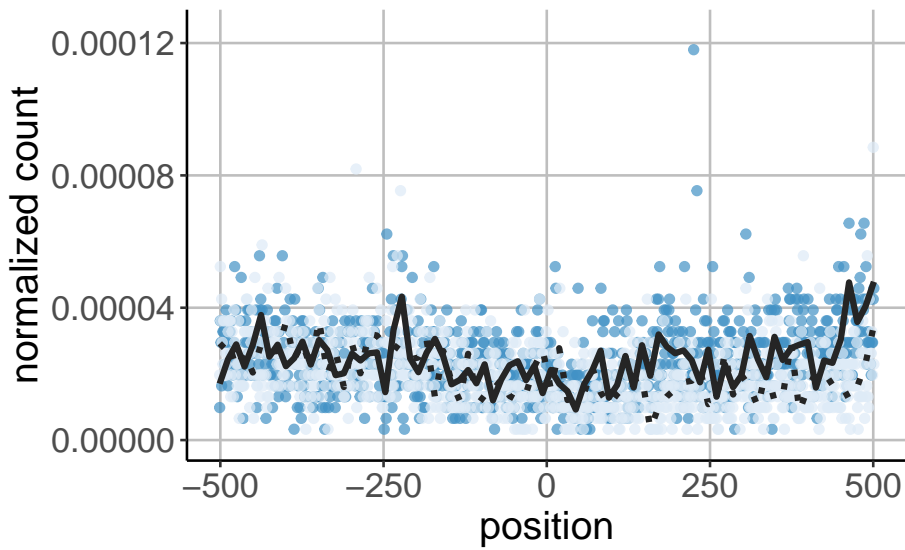

HNRNPCL1-NGGGUCUNAUUUUUAAN

• antisense — sense    • antisense • sense

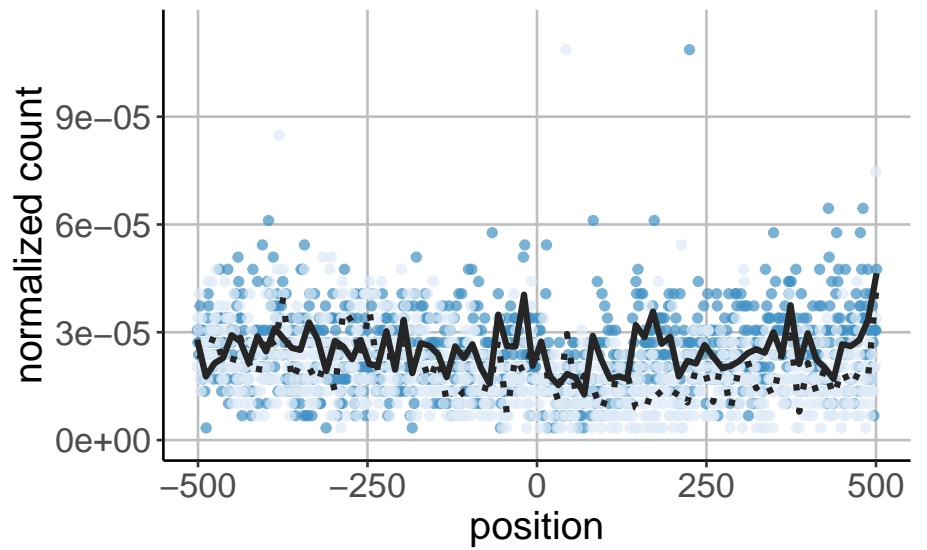

MKRN1-NYGUAAAKUGUAGN

• antisense — sense    • antisense • sense

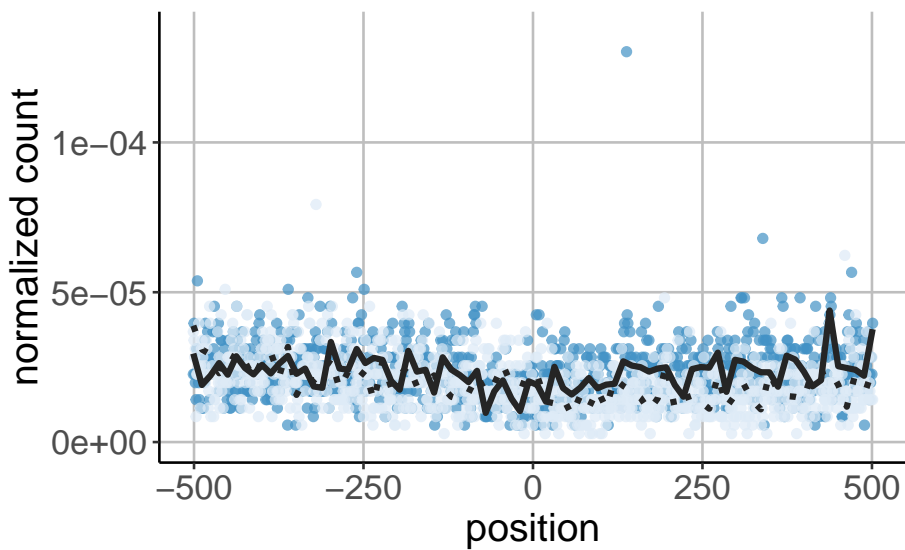

RALY-GGGUCUWUUUUUAA

• antisense — sense    • antisense • sense

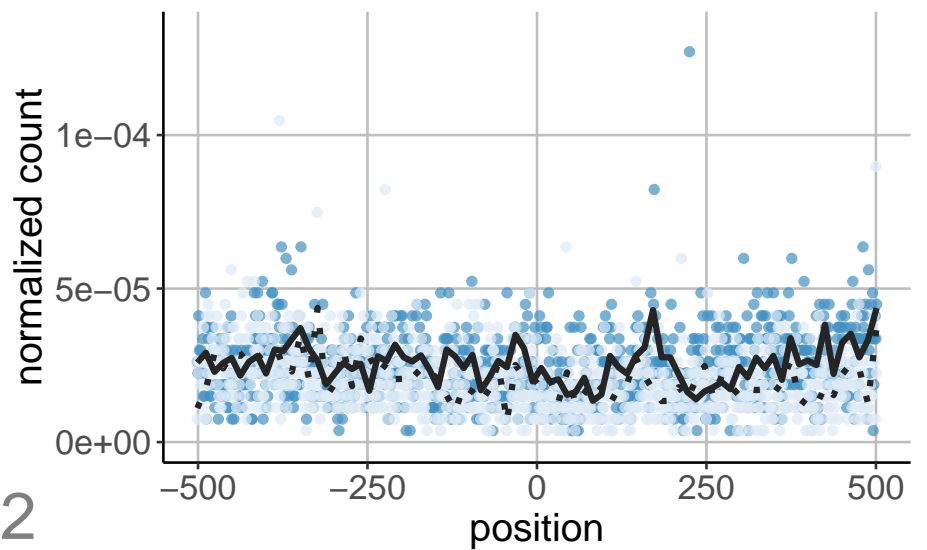

2

TSS

RBFOX1\_4-GKUGCAUGUG

•• antisense — sense    • antisense • sense

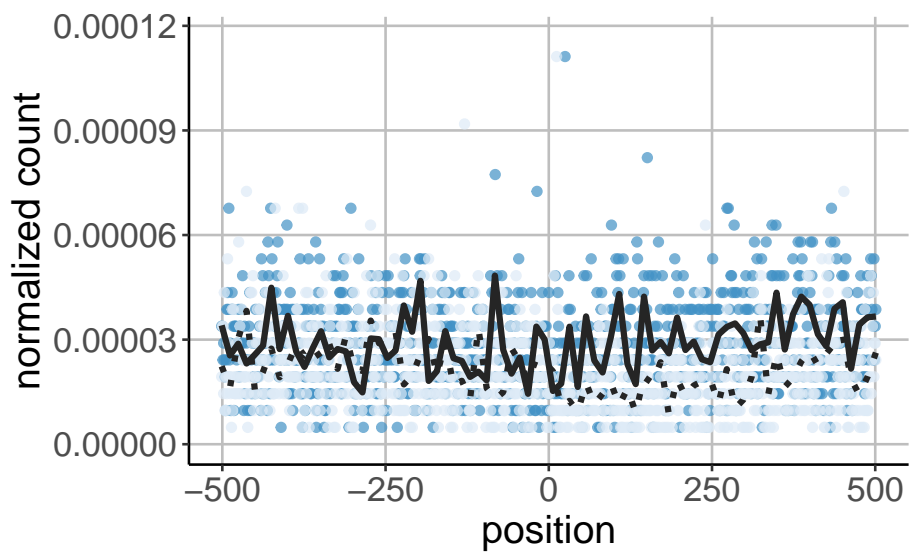

RBFOX3-GUWGCAUGUG

•• antisense — sense    • antisense • sense

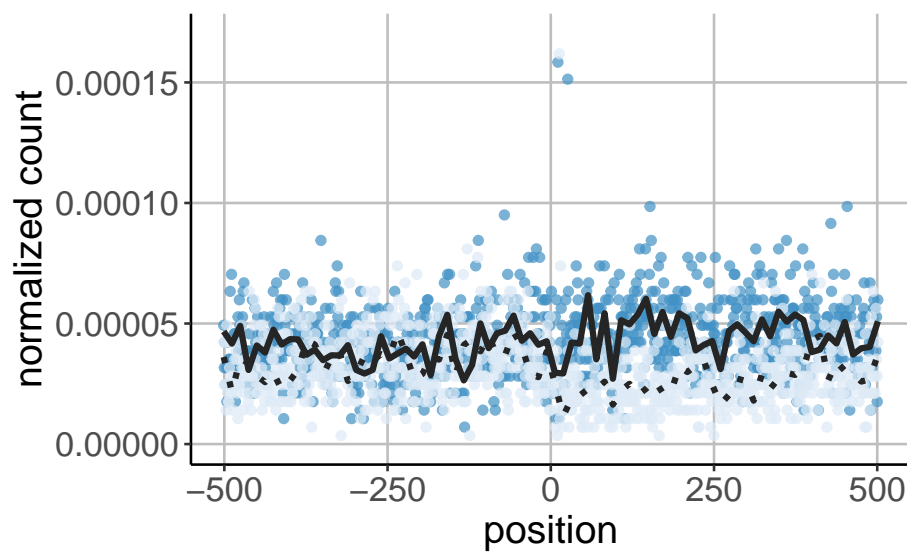

RBM4-KGUUGC GCGGG

•• antisense — sense    • antisense • sense

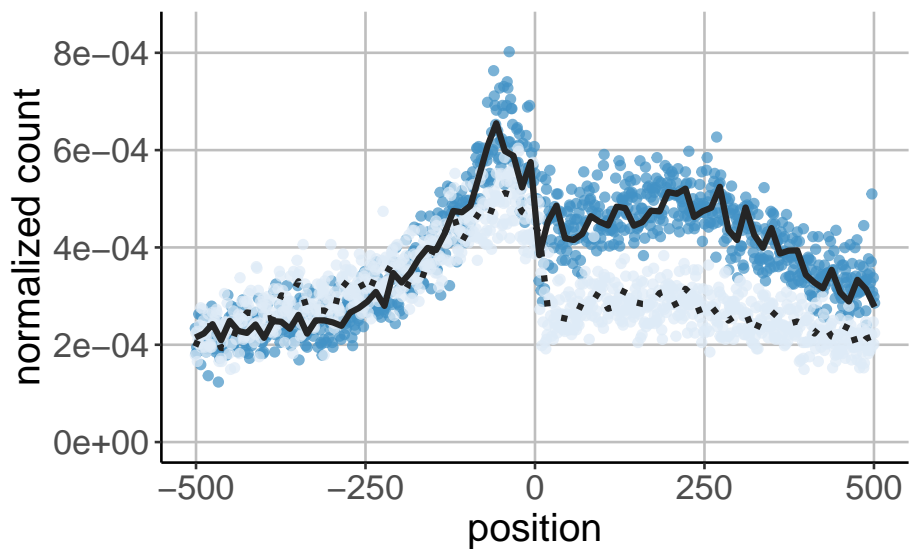

RBM4-UGAGUGCGGUAG

•• antisense — sense    • antisense • sense

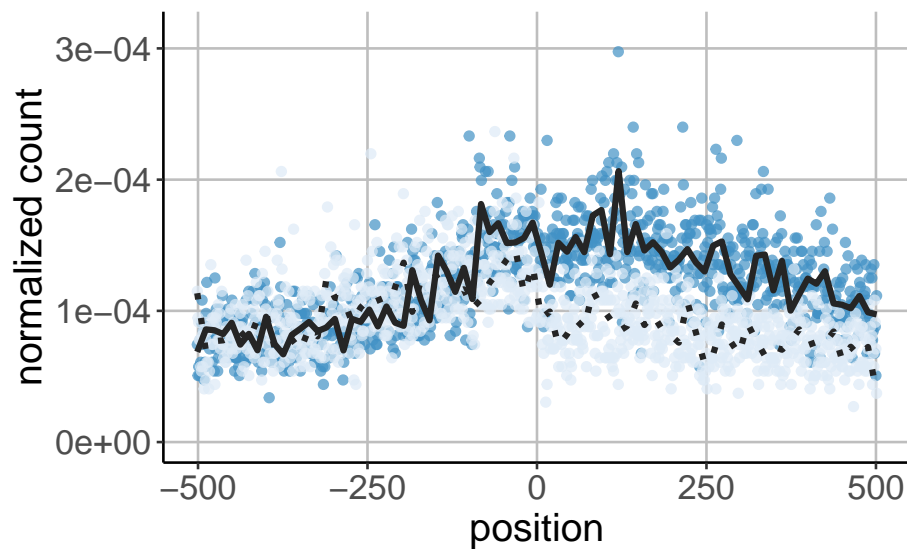

RBM4B-KGUUGC GCGGG

•• antisense — sense    • antisense • sense

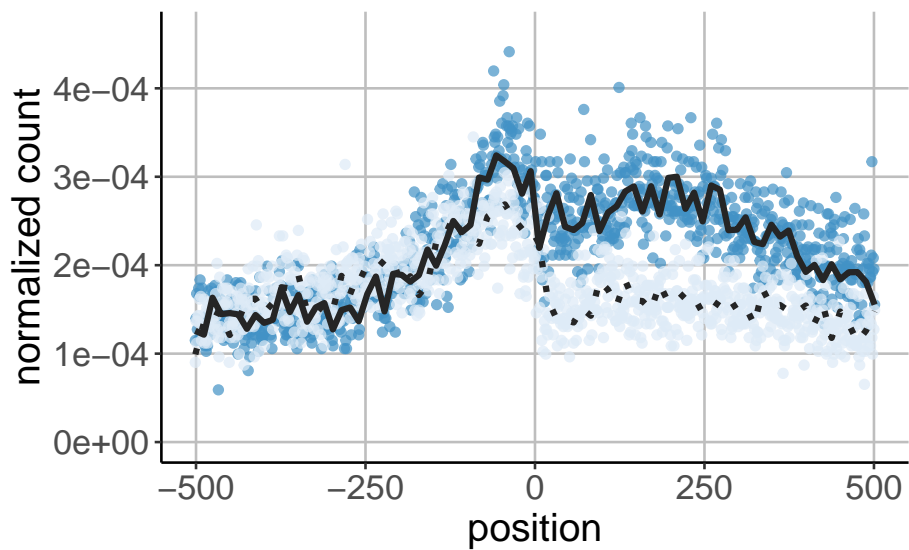

RBM4B-UGAGUGCGGUAG

•• antisense — sense    • antisense • sense

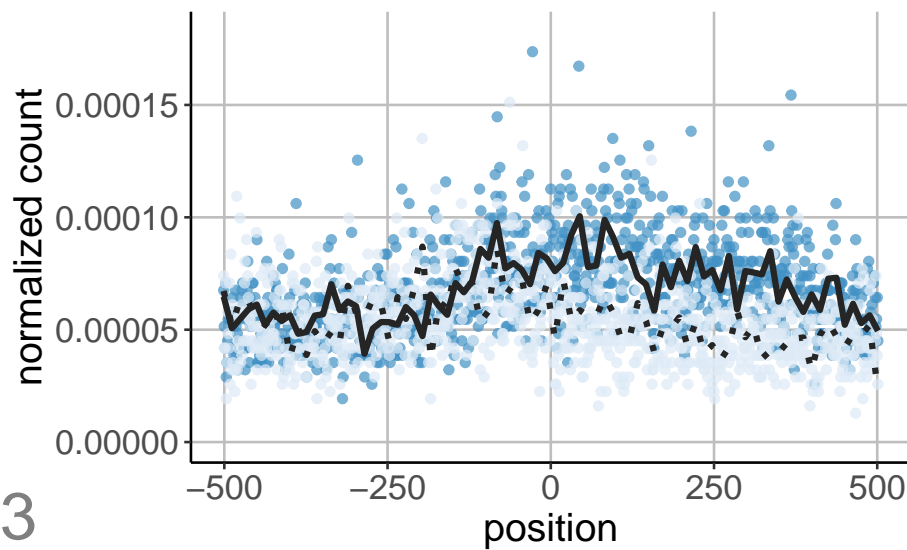

3

TSS

RBM6-YRCGCUCCUNGCY

• antisense — sense    • antisense • sense

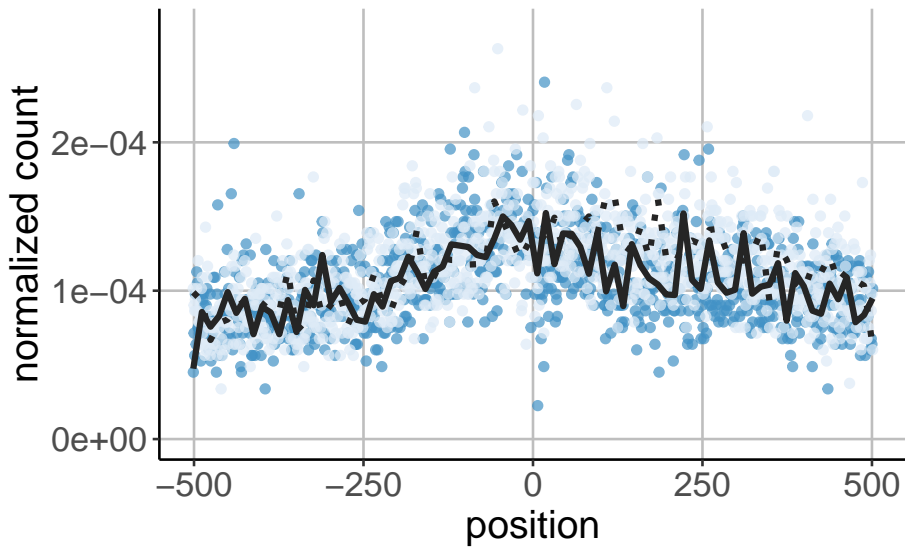

RBM6-YRYGCUCGUGGCYN

• antisense — sense    • antisense • sense

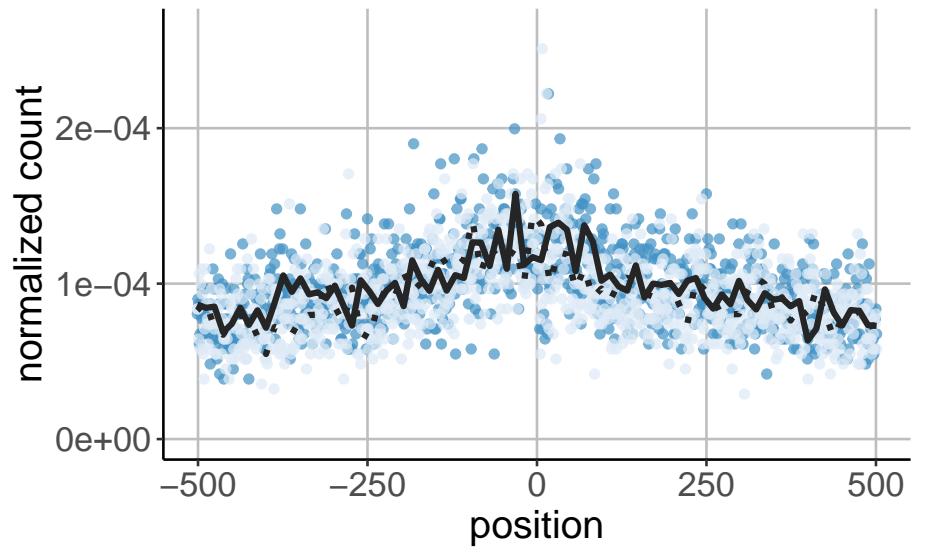

RBMS1-SGUGCAUAAKGCN

• antisense — sense    • antisense • sense

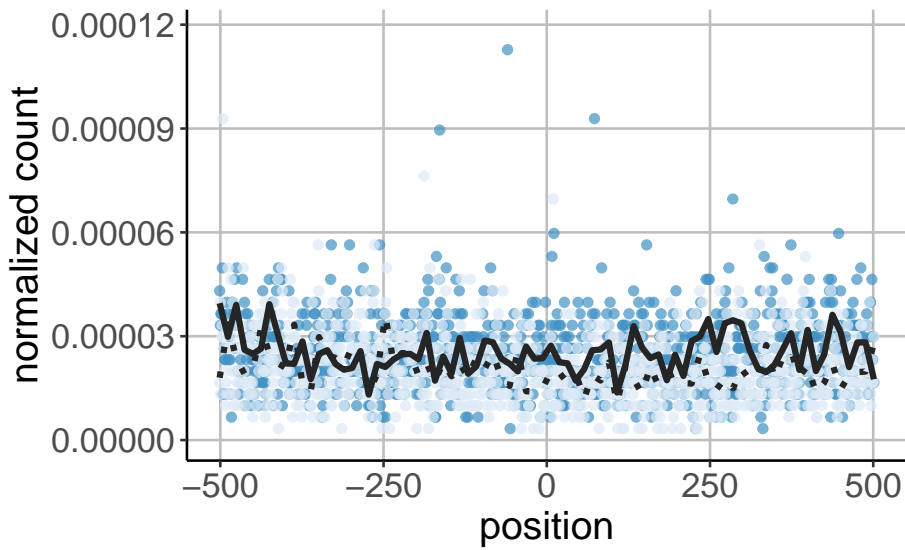

RBMS2-NUGCAUAAUGN

• antisense — sense    • antisense • sense

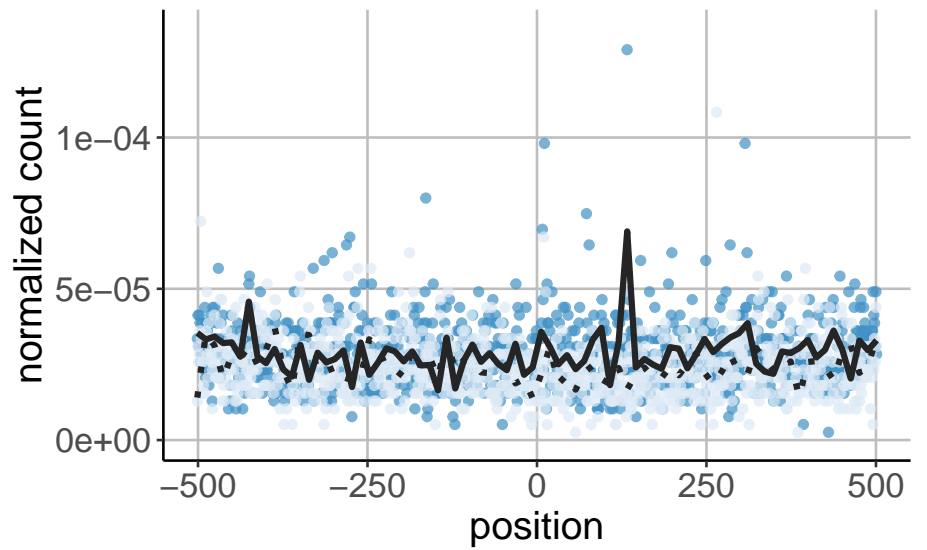

RBMS3-NUGCAUAAUGN

• antisense — sense    • antisense • sense

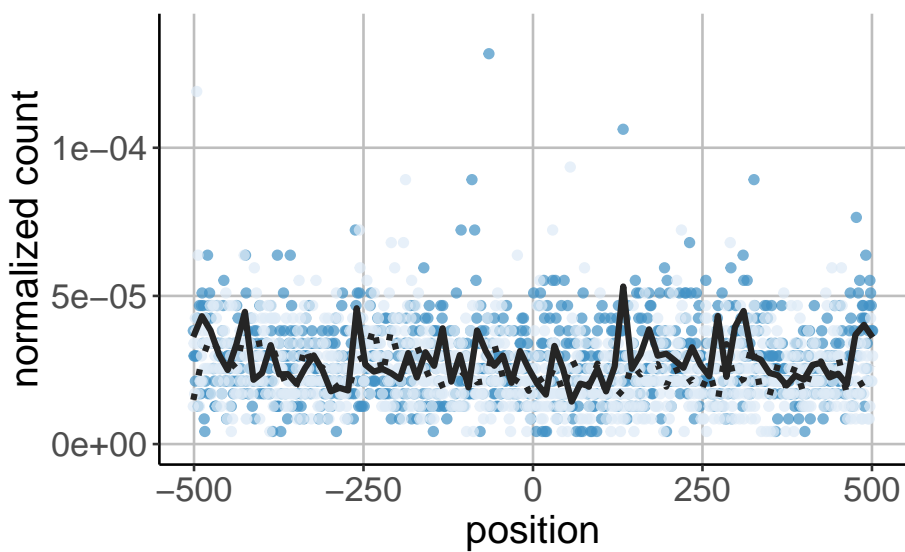

RBMS3-SAUGYAUAAKUG

• antisense — sense    • antisense • sense

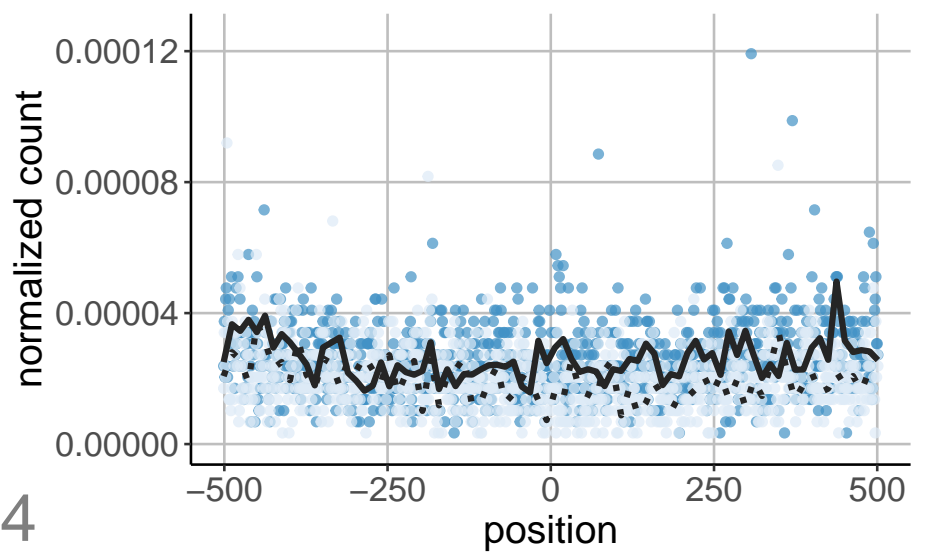

TSS

RBMY1E-NGCUUCGNGCN

•• antisense — sense    • antisense • sense

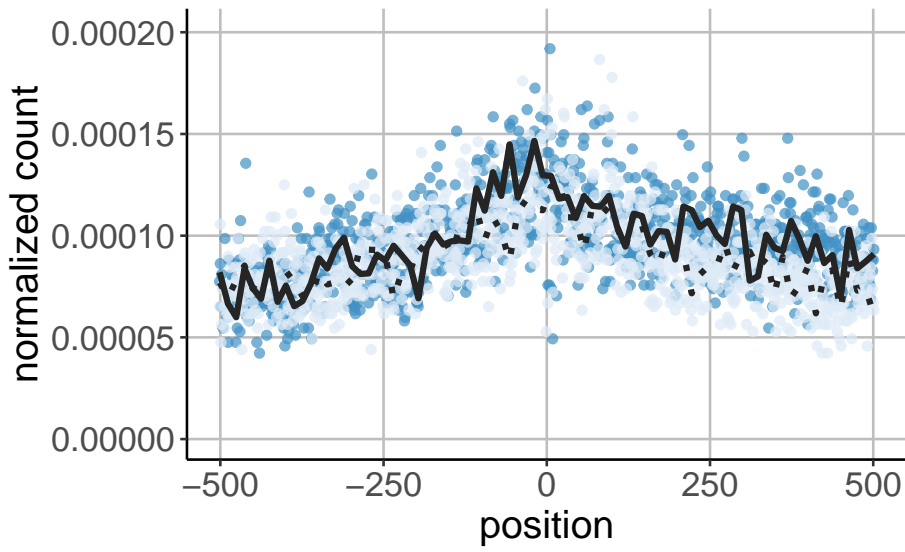

RBMY1E-NAGCUUNGUGCUN

•• antisense — sense    • antisense • sense

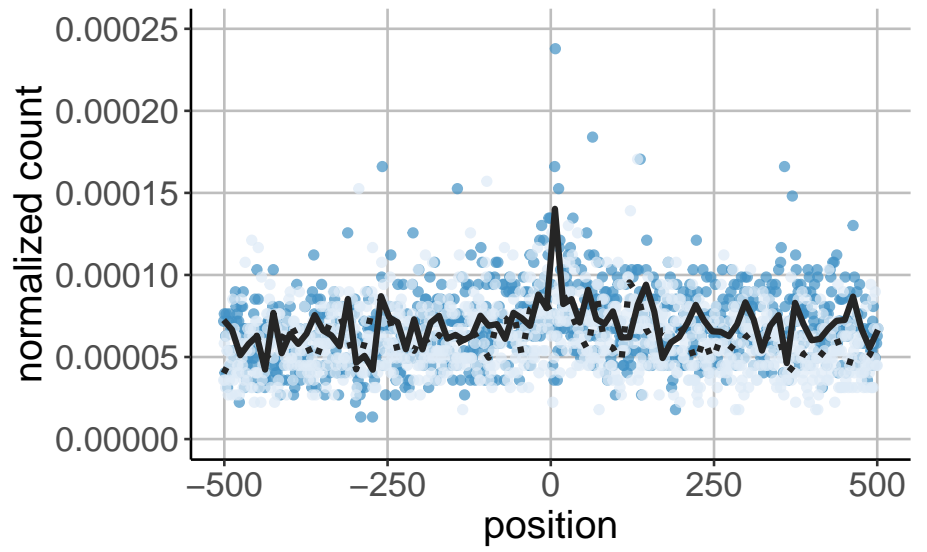

RBMY1F-NGCCUCAAGGYN

•• antisense — sense    • antisense • sense

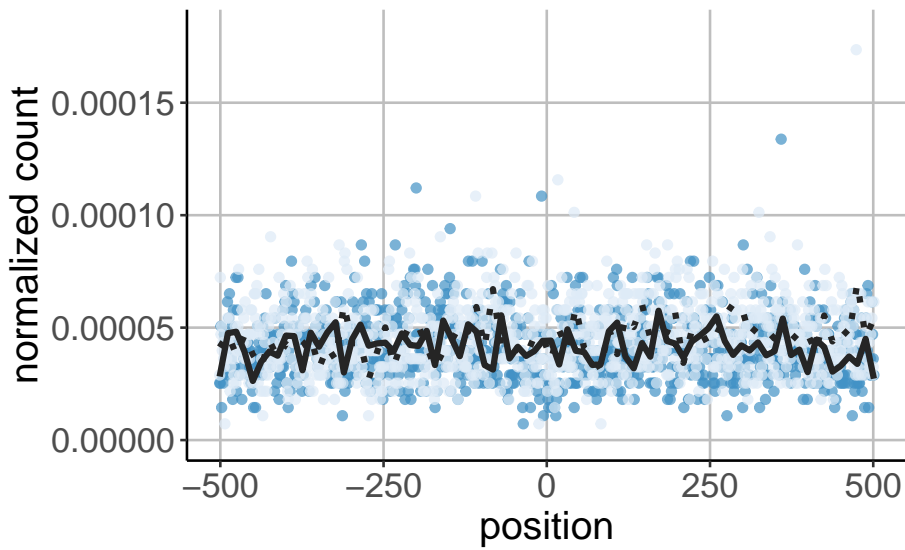

RBMY1F-GCGCAAGAGC

•• antisense — sense    • antisense • sense

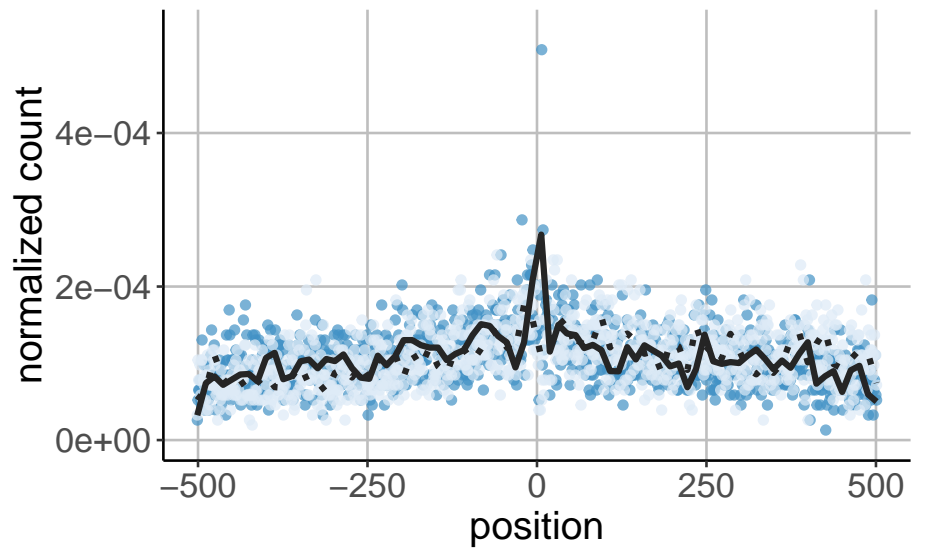

RBMY1J-NGCCUCAAGGYN

•• antisense — sense    • antisense • sense

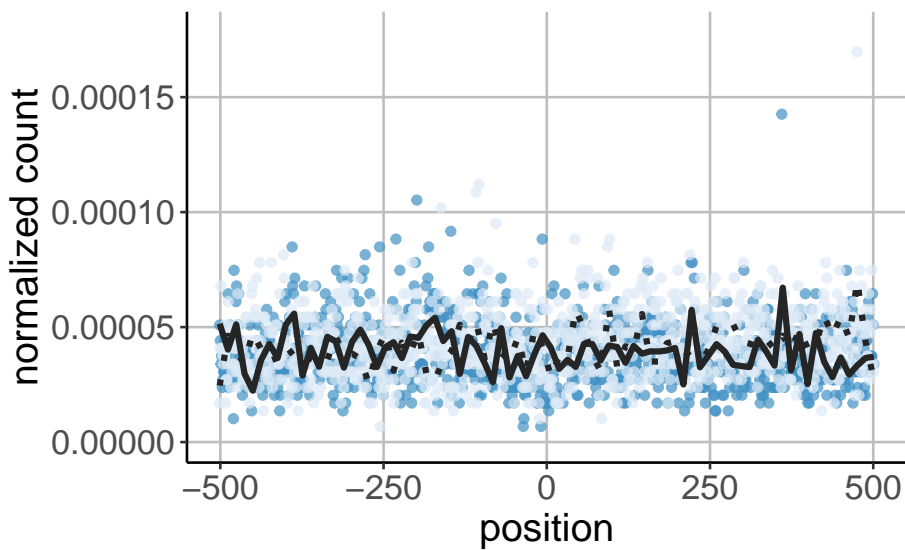

RBMY1J-GCGCAAGAGC

•• antisense — sense    • antisense • sense

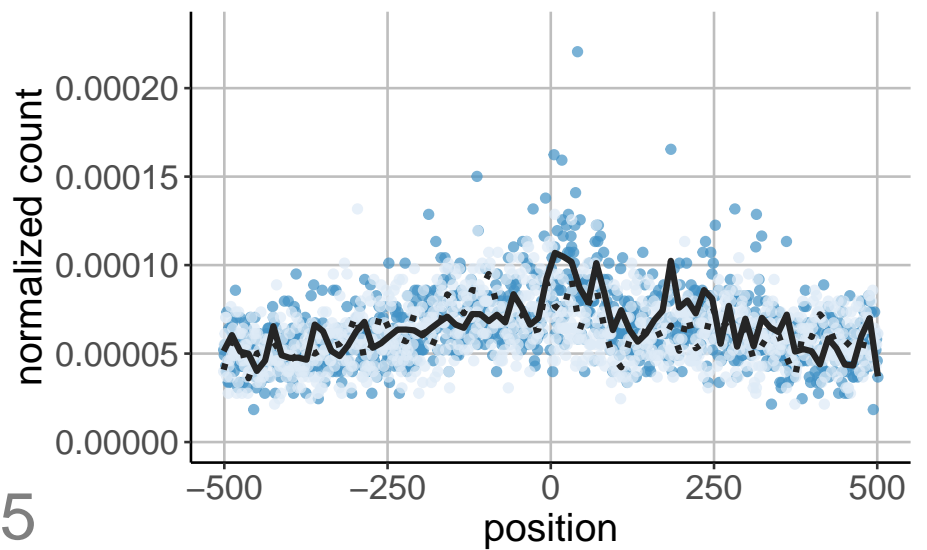

5

TSS

RBMY1J-NGCGUCGUGGCN

•• antisense — sense    • antisense • sense

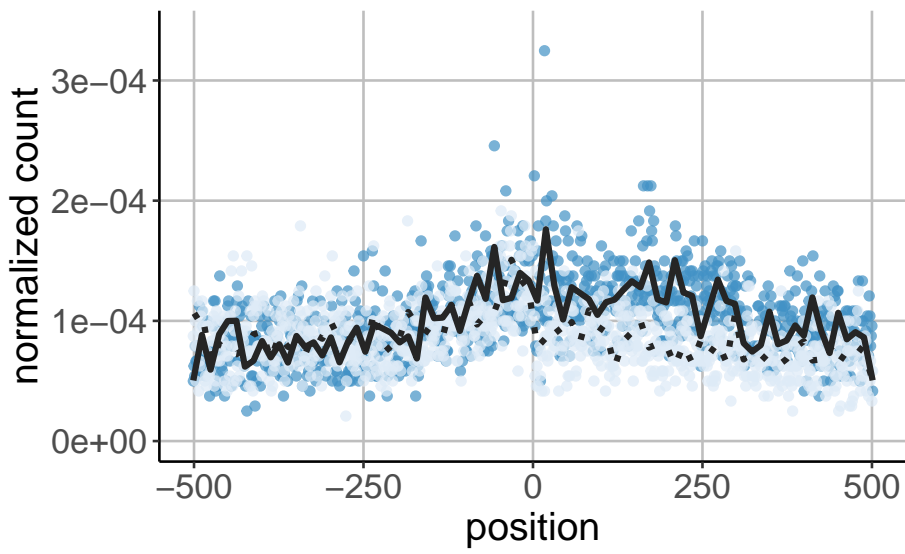

RBMY1J-UGAAUUCGUCN

•• antisense — sense    • antisense • sense

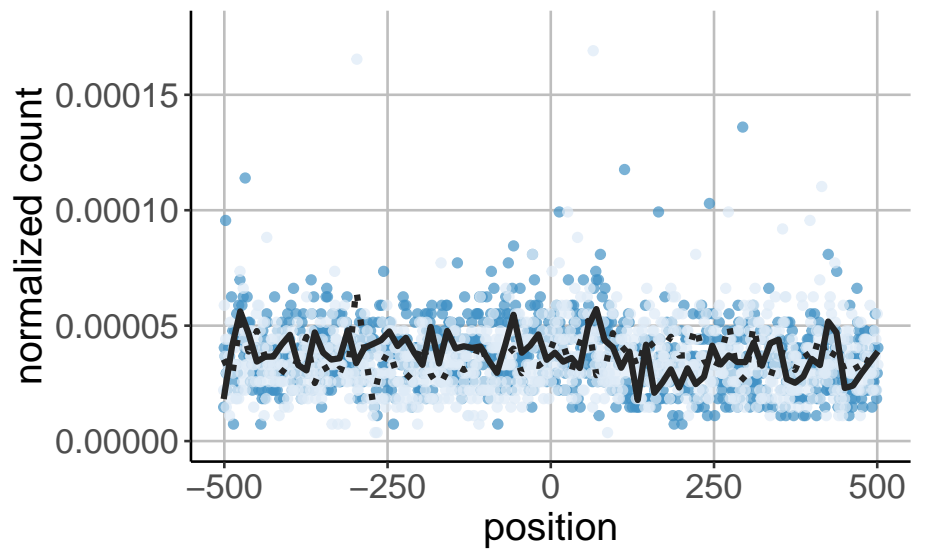

RC3H1\_2-YRCGUUUUAGKR

•• antisense — sense    • antisense • sense

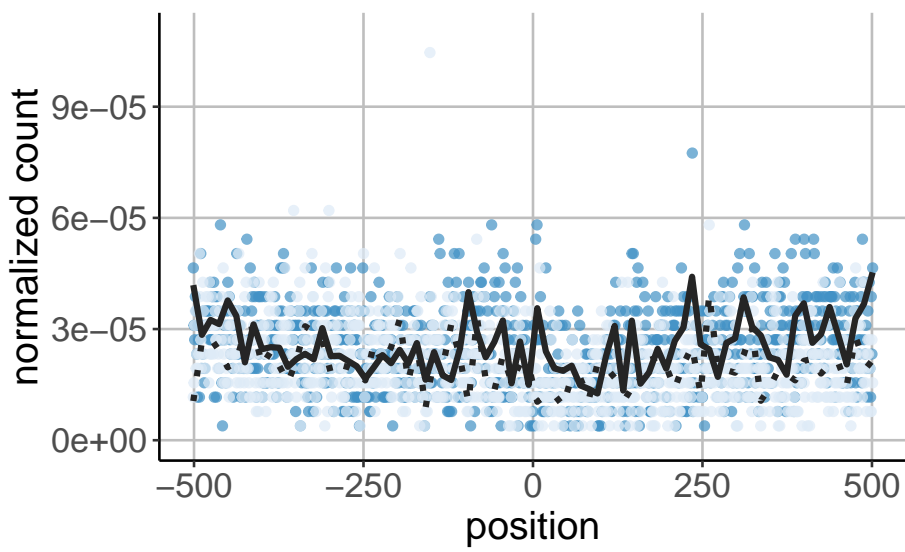

RC3H2-CURCGUUUUAGKAG

•• antisense — sense    • antisense • sense

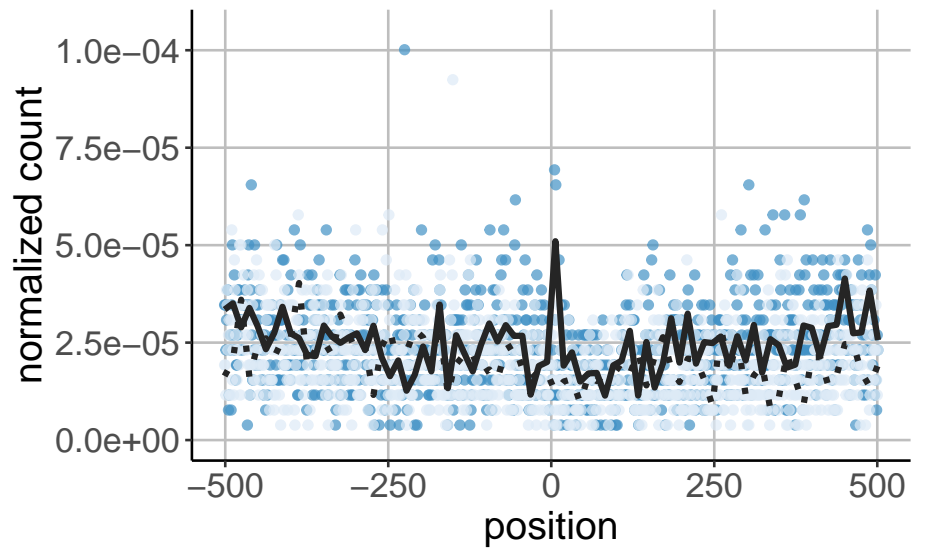

RC3H2-CUCGUAUCGAG

•• antisense — sense    • antisense • sense

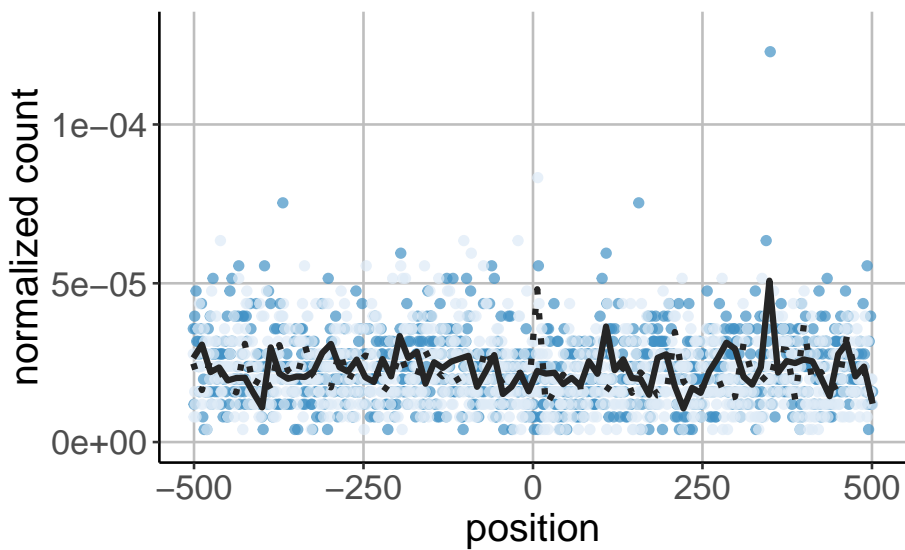

RC3H2-CCUCUNUGAGG

•• antisense — sense    • antisense • sense

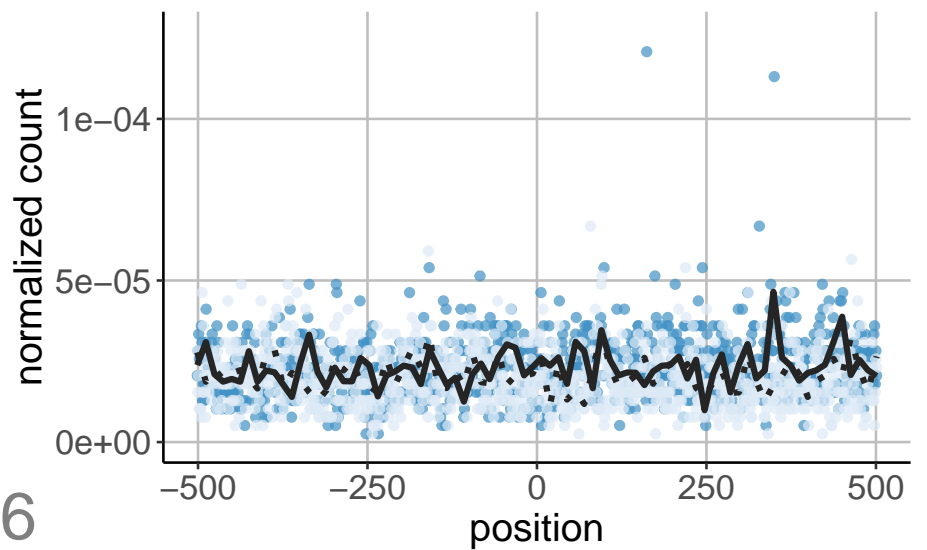

6



TSS

RNPC3-GCAGUKUUAGGGY

•• antisense — sense    • antisense • sense

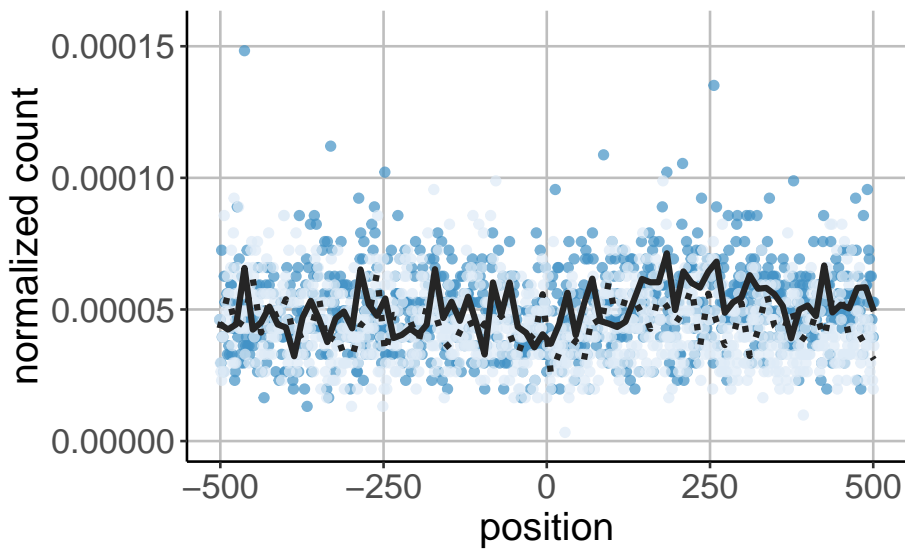

YBX1-RCCAYRHCAUCGY

•• antisense — sense    • antisense • sense

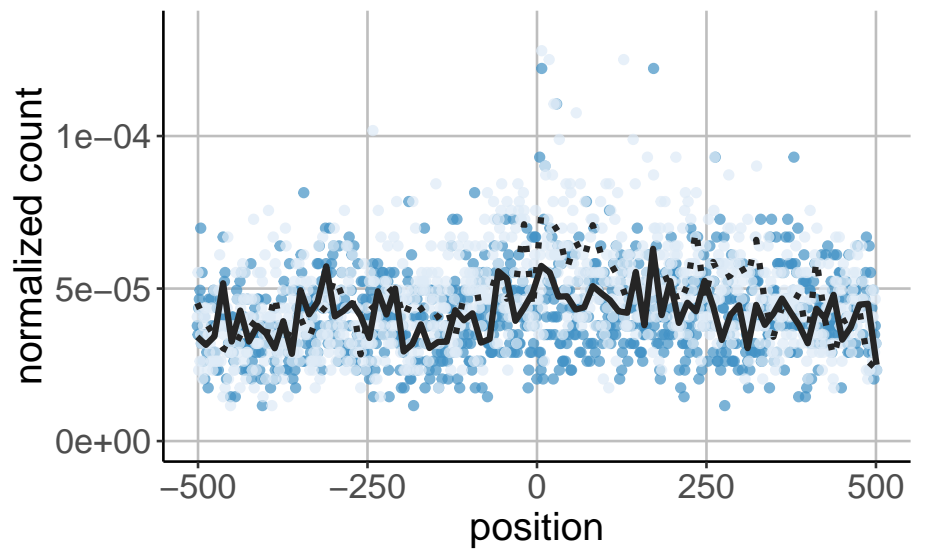

ZC3H12A-NGCAGGUAAGUGCN

•• antisense — sense    • antisense • sense

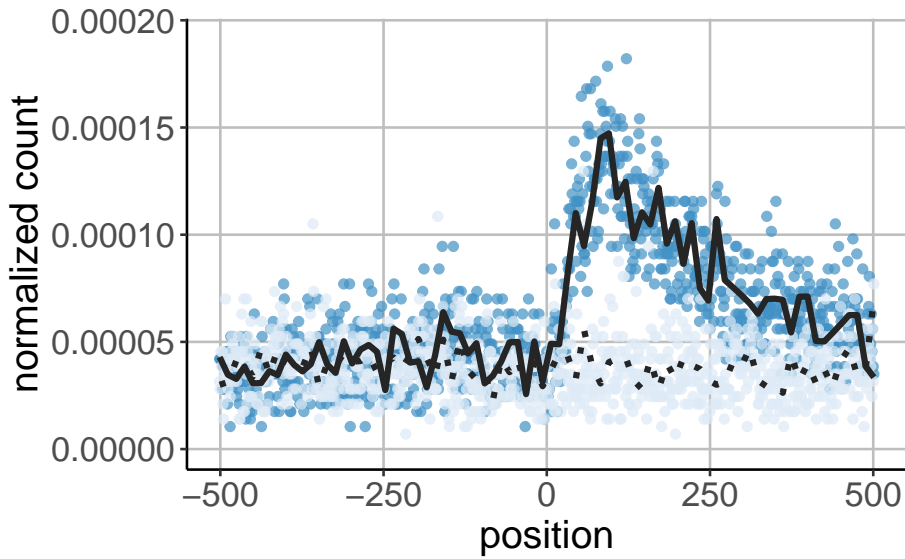

ZC3H12B-NGCAGGUAAGUGSN

•• antisense — sense    • antisense • sense

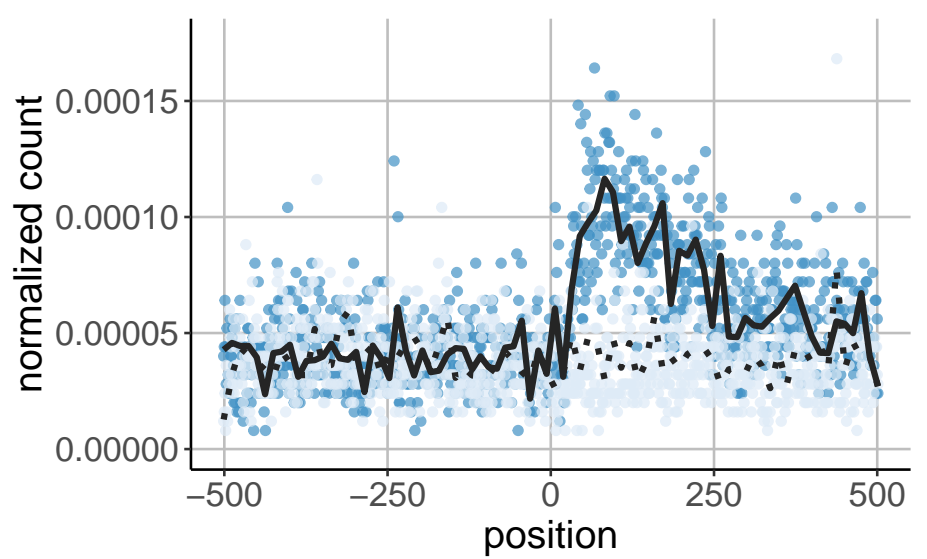

ZC3H12B-SCAGGUAUUAUGS

•• antisense — sense    • antisense • sense

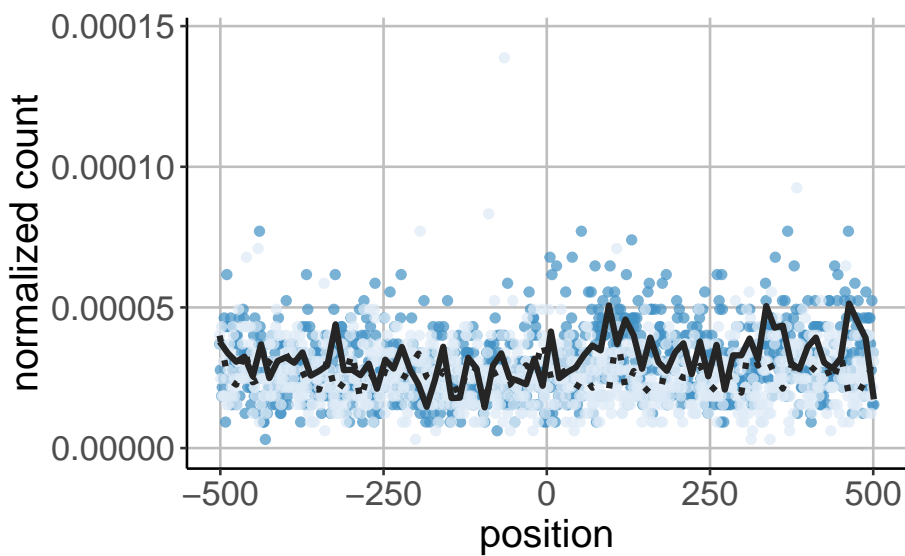

7

STARTcodon

ZC3H8-GCUUGC

•• antisense — sense    • antisense • sense

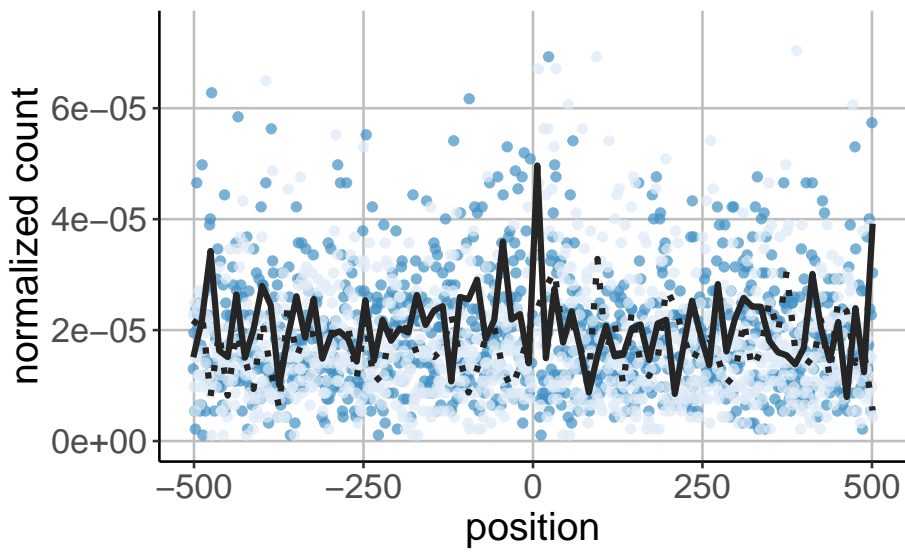

ESRP1\_3-GGUGUUGGUG

•• antisense — sense    • antisense • sense

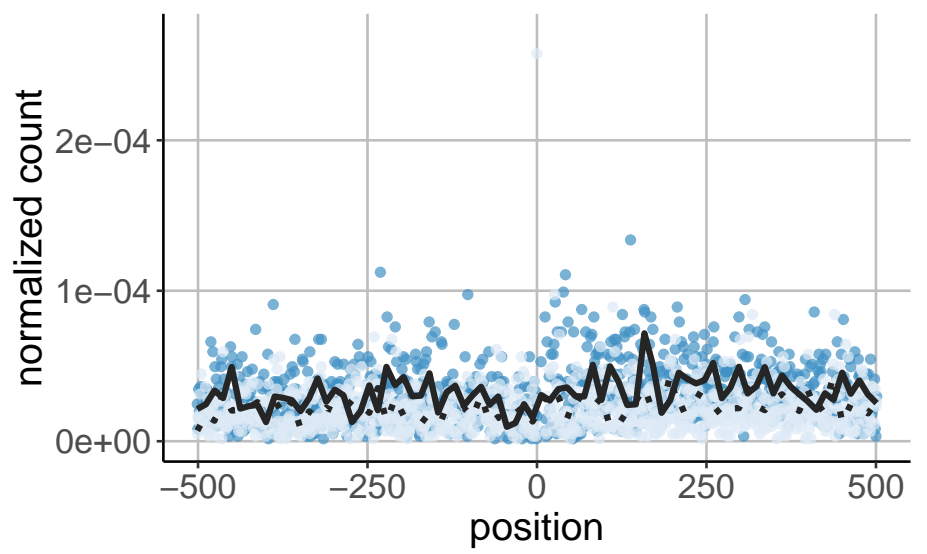

ELAVL3-GUUUUUG

•• antisense — sense    • antisense • sense

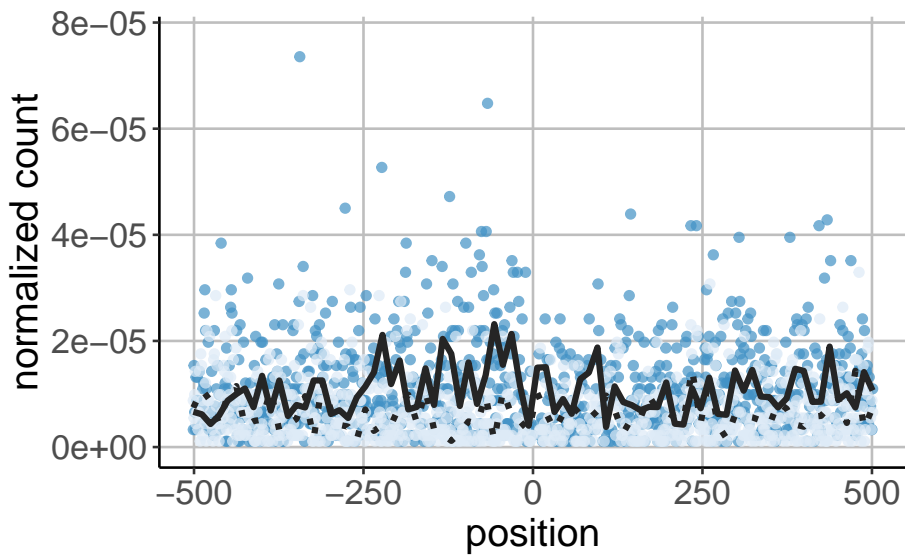

PUM1-NUGUAAAUAG

•• antisense — sense    • antisense • sense

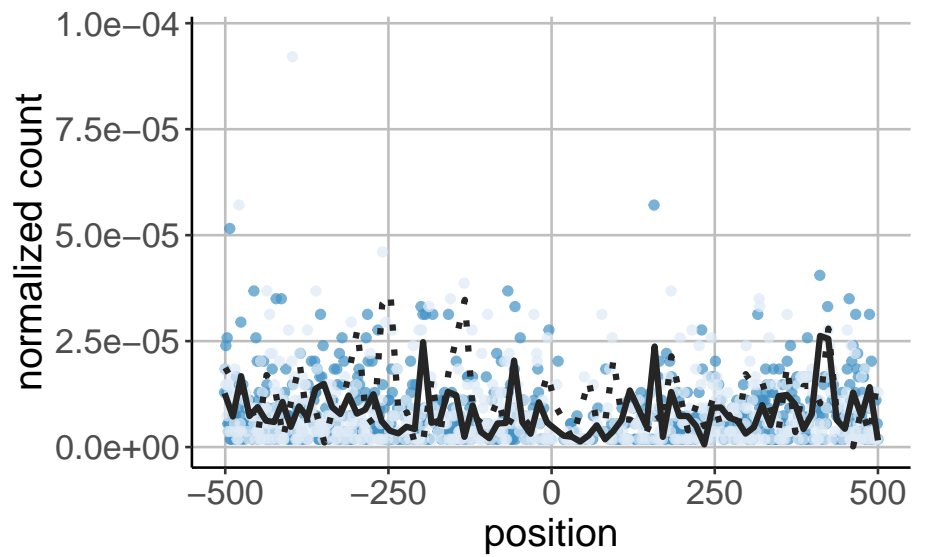

QKI-NUACUAACAWN

•• antisense — sense    • antisense • sense

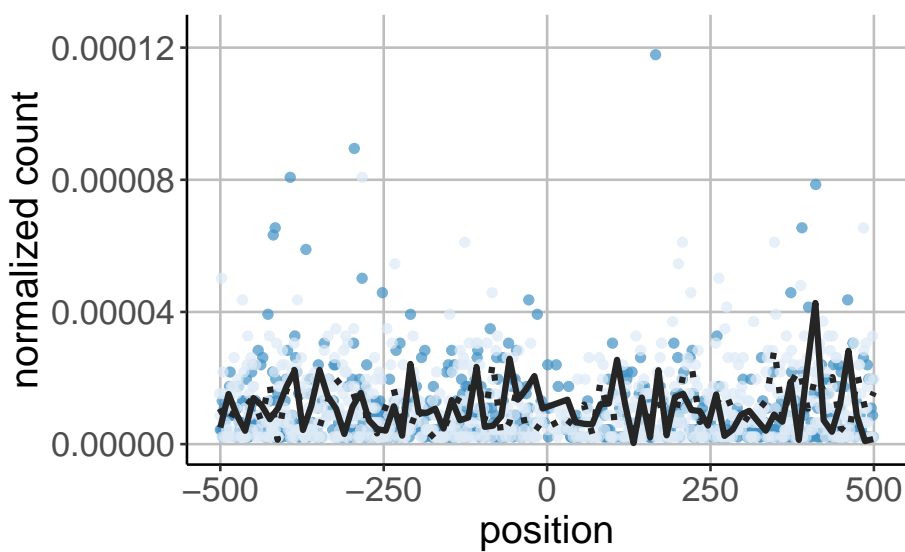

MCM3AP-CGCCAGUGCG

•• antisense — sense    • antisense • sense

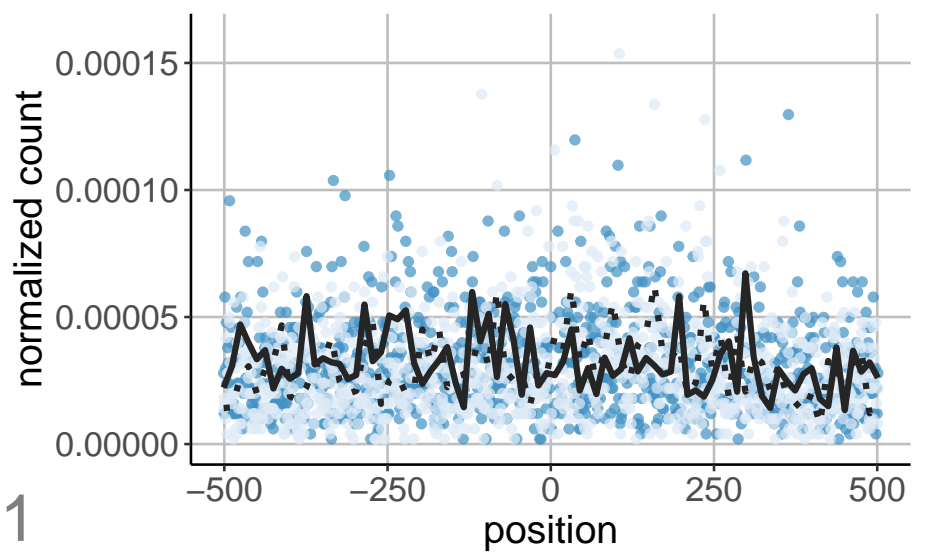

STARTcodon

HNRNPC-UUUUUGGUGG

•• antisense — sense    • antisense • sense

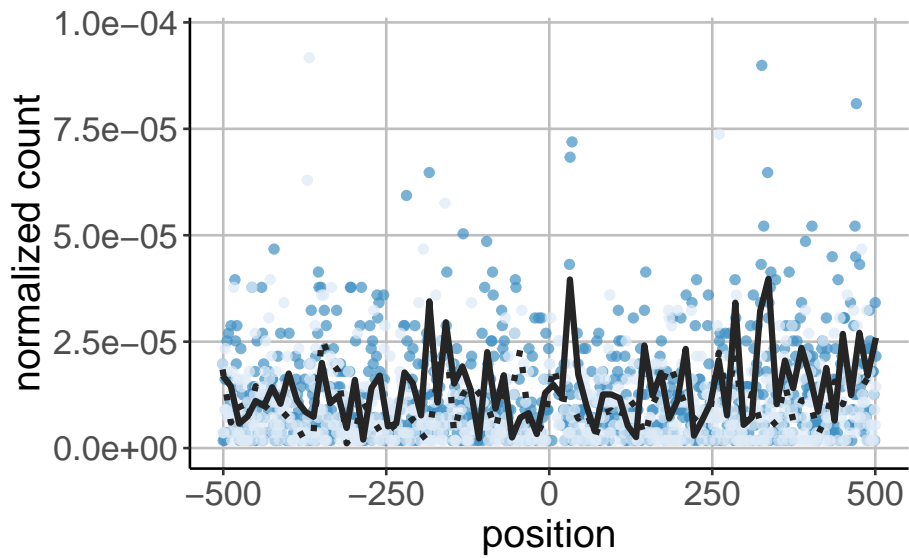

PABPC5-NUAKAAAKUURCN

•• antisense — sense    • antisense • sense

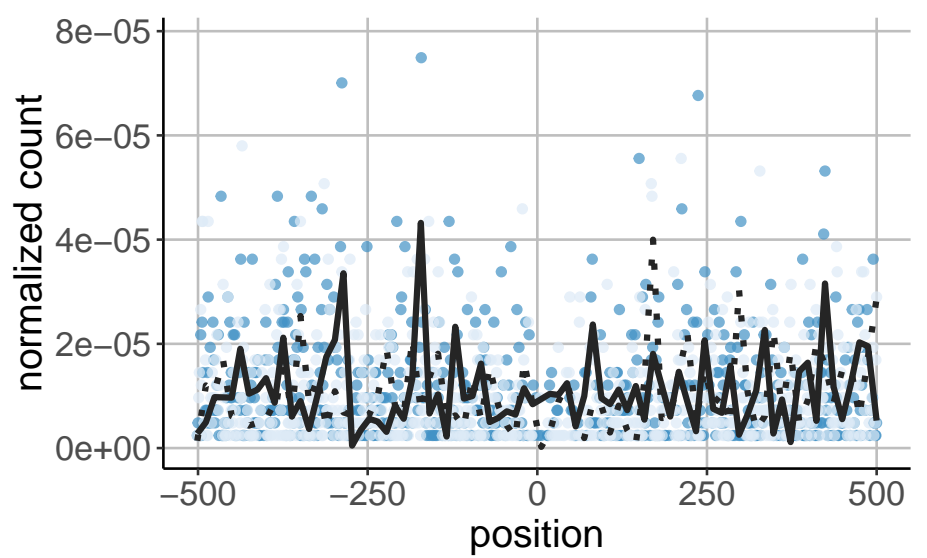

PABPC5-NUAKAAAUUACUACAN

•• antisense — sense    • antisense • sense

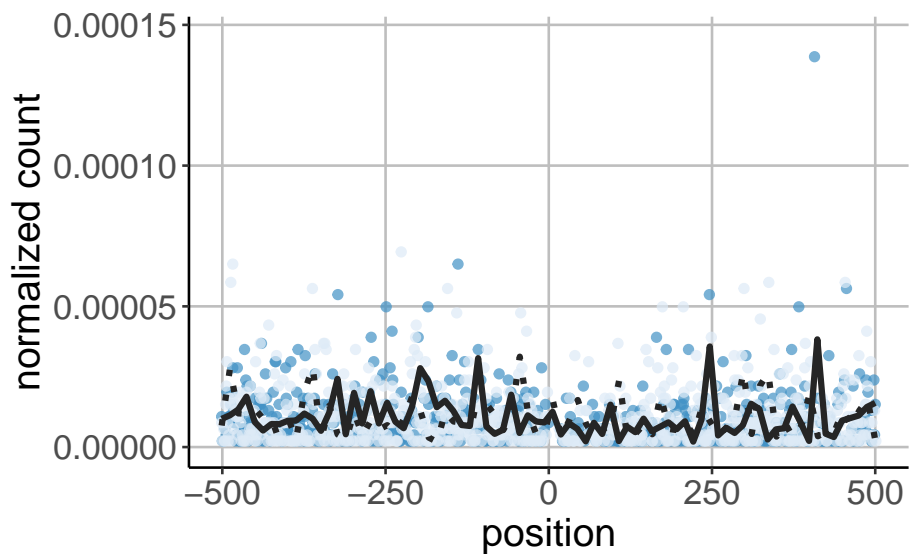

LARP7\_4-GRUCGUGAUGN

•• antisense — sense    • antisense • sense

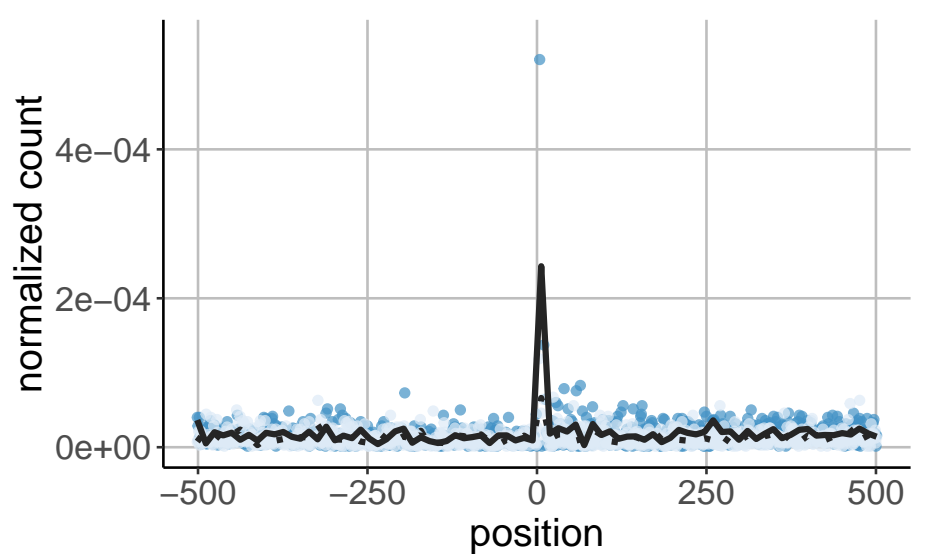

ZCRB1-GUAUUAAGGG

•• antisense — sense    • antisense • sense

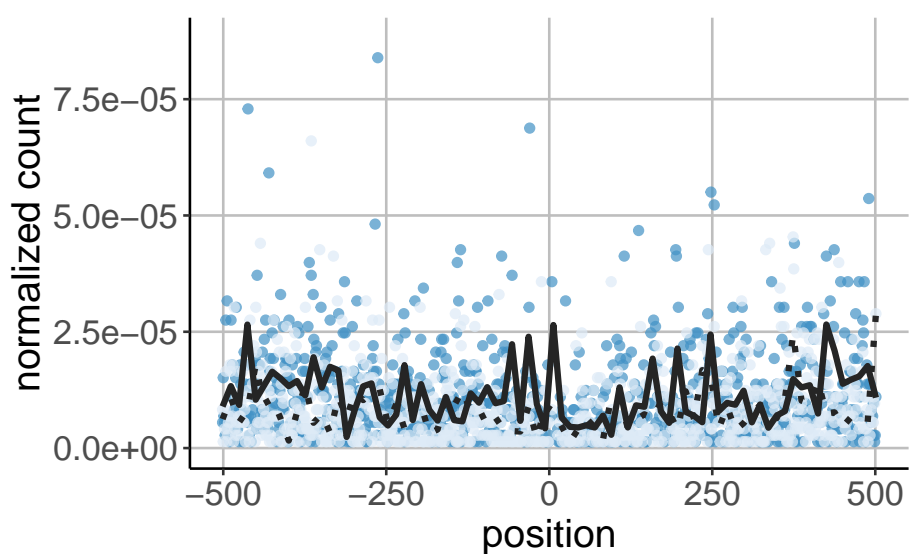

ZCRB1-GUGGACUUAANNN

•• antisense — sense    • antisense • sense

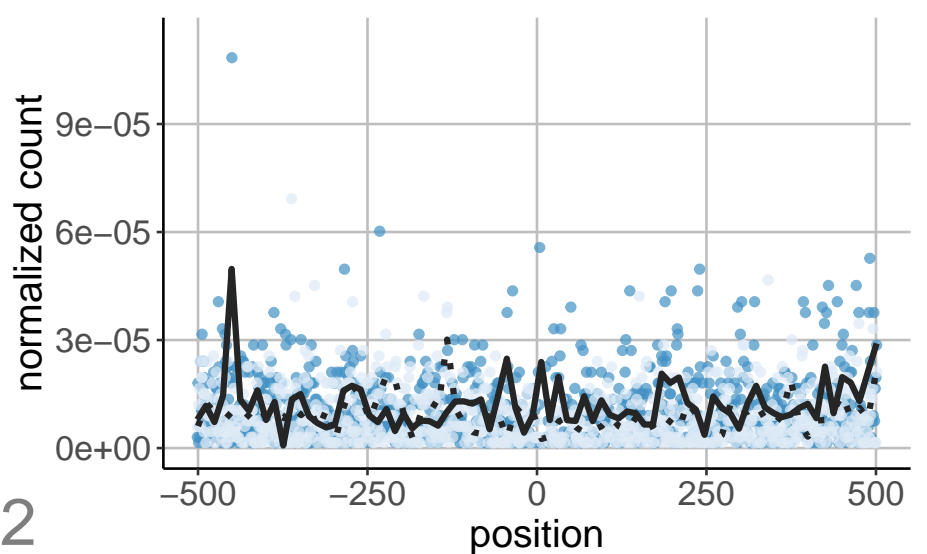

2

STARTcodon

RBM42-NGGAACUAAN

•• antisense — sense    • antisense • sense

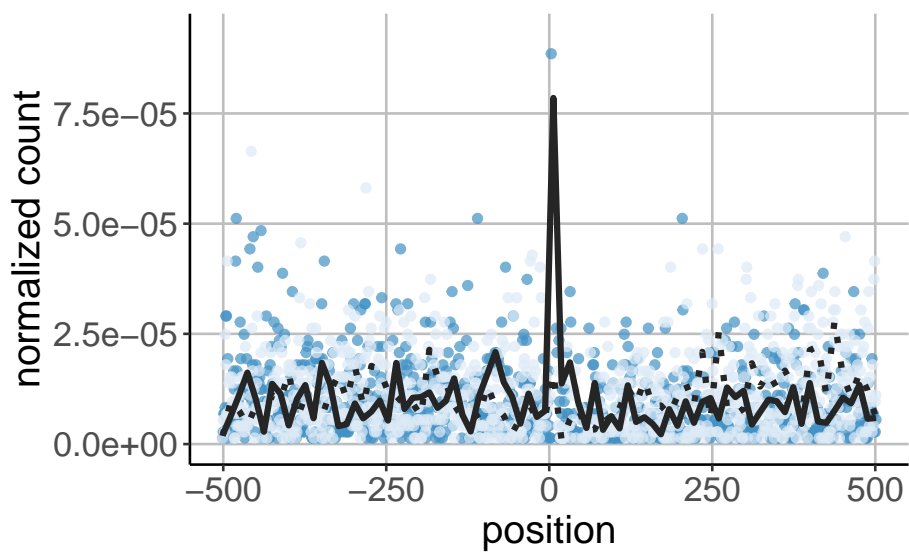

KHDRBS1-UAAUAGN

•• antisense — sense    • antisense • sense

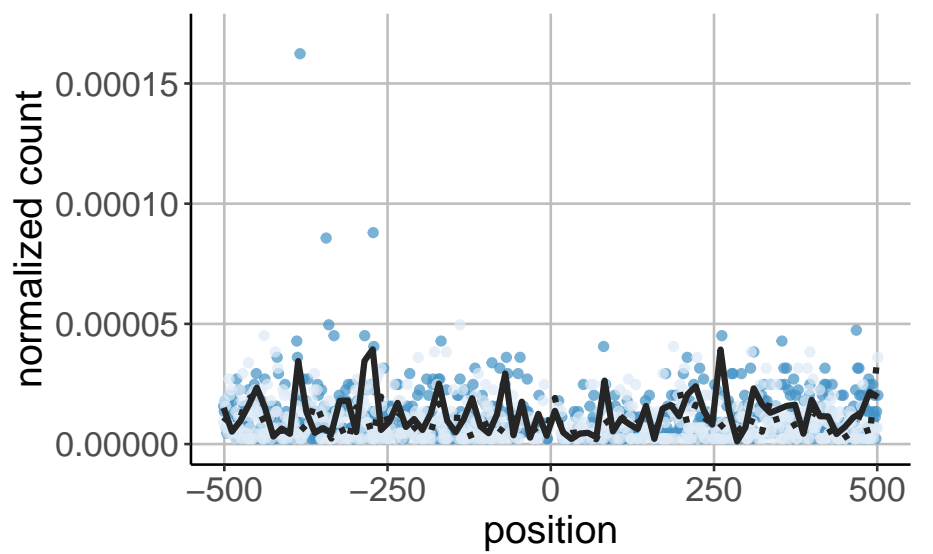

HNRNPCL1-GUUUUUUGGG

•• antisense — sense    • antisense • sense

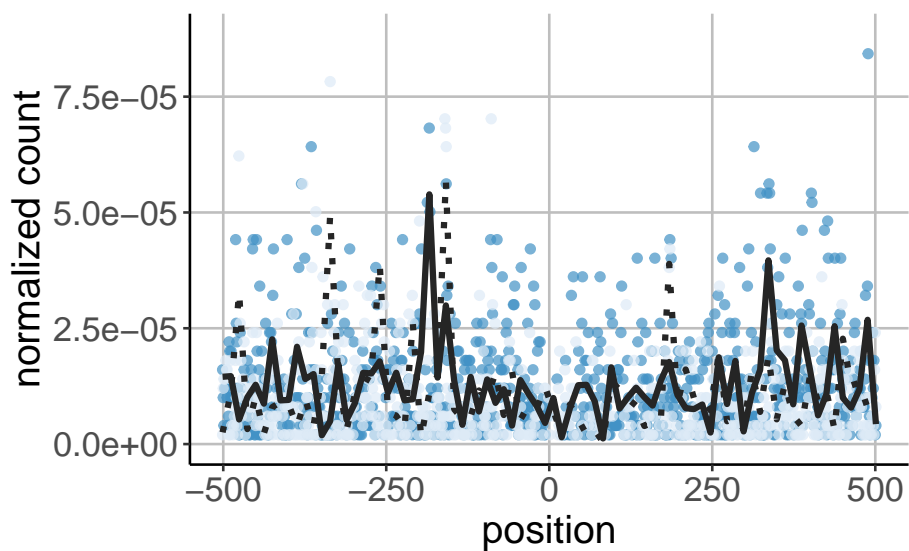

ZFR\_4-GUGACGGAUG

•• antisense — sense    • antisense • sense

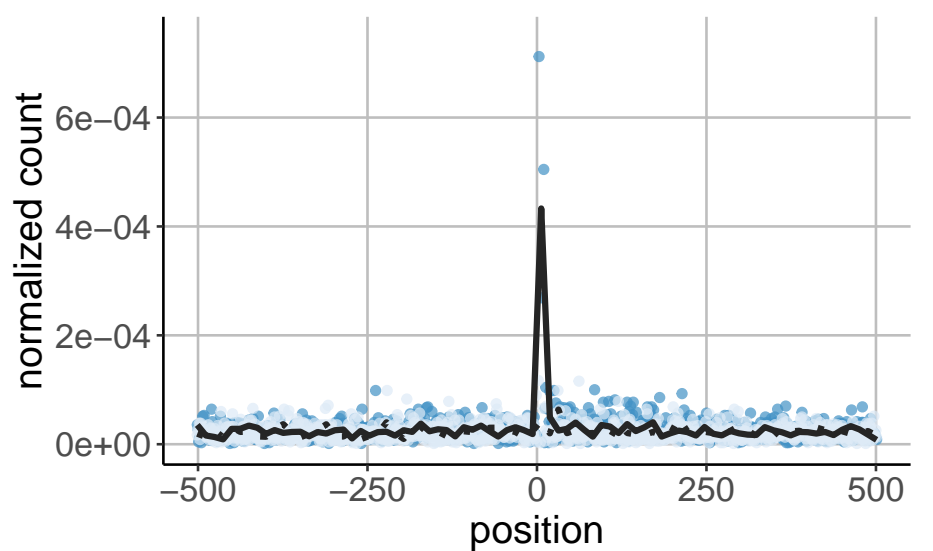

ZFR\_4-GUGCGGAUGN

•• antisense — sense    • antisense • sense

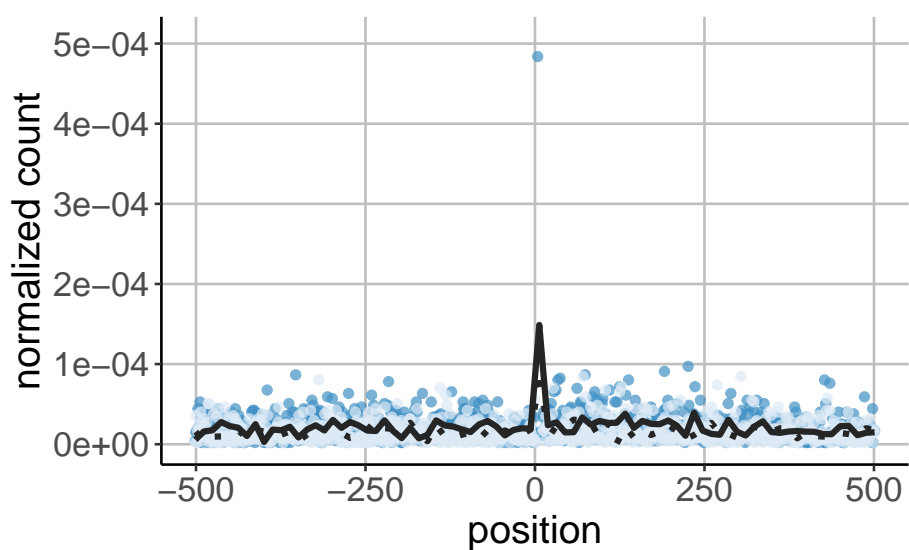

HNRPLL-GCAURCAYCC

•• antisense — sense    • antisense • sense

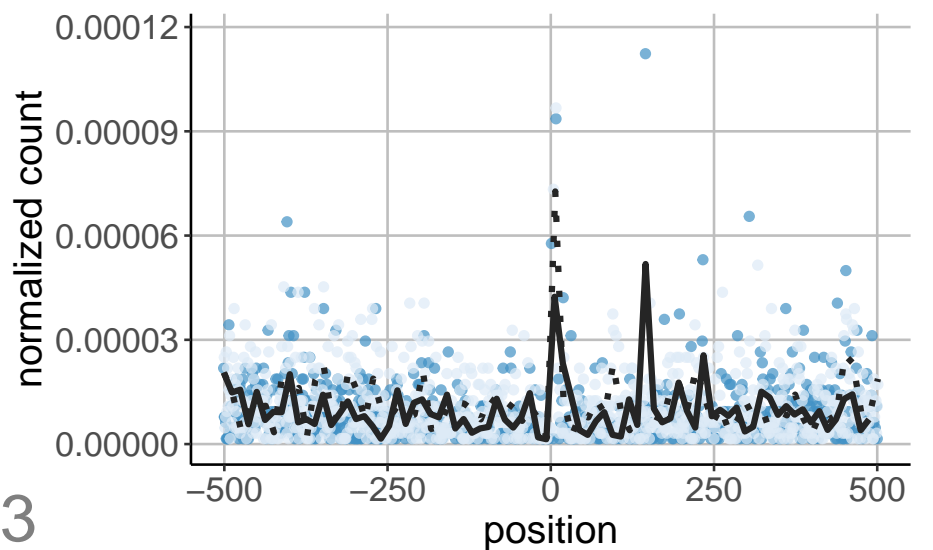

3

**STARTcodon**

ZC3H12C-NUGCGNCAGUCGGUAGC

•• antisense — sense    • antisense • sense

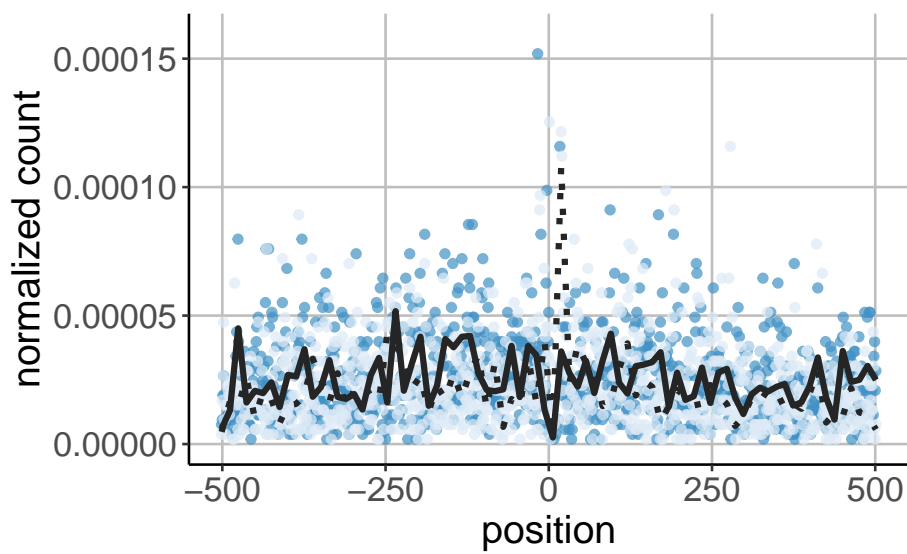

HNRNPL\_2-ACAUWWCAUW

•• antisense — sense    • antisense • sense

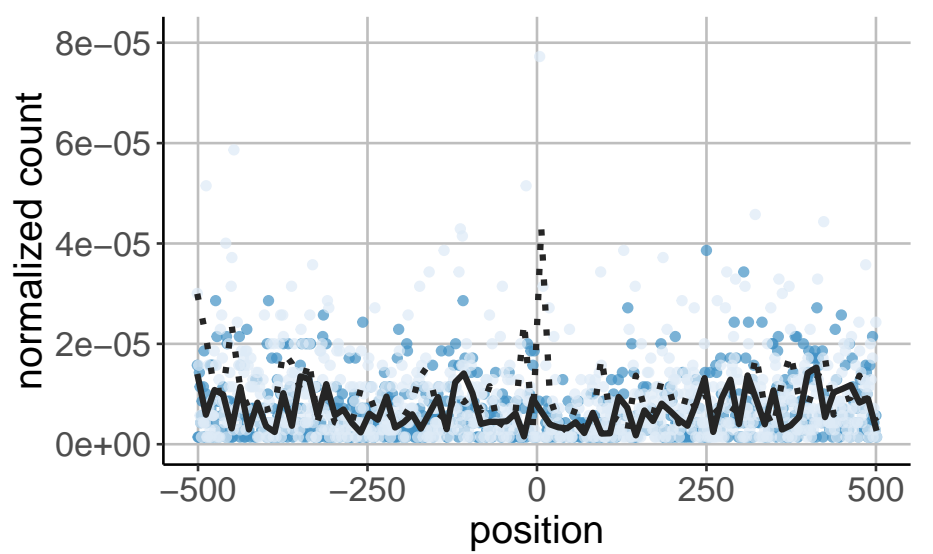

RBMS2-CAGUGAUUGG

•• antisense — sense    • antisense • sense

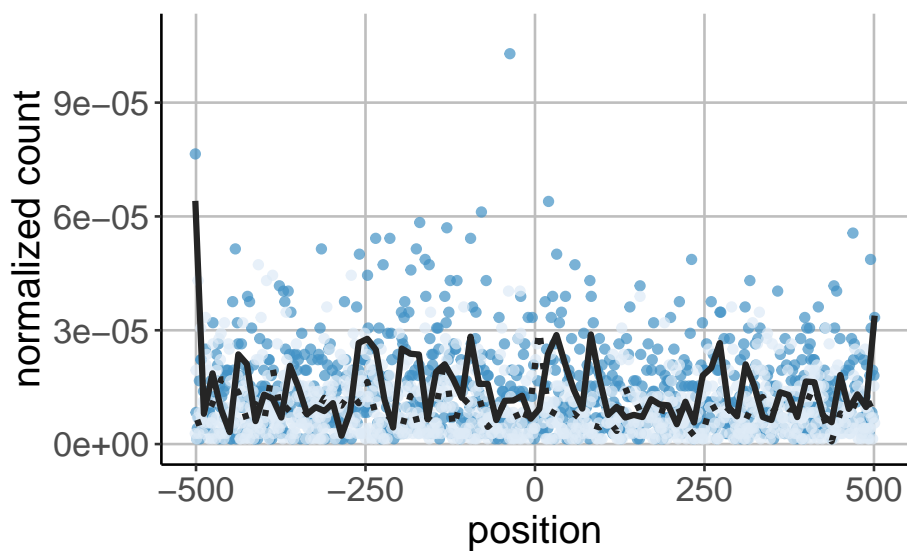

RBM14-GGKUGCGUCG

•• antisense — sense    • antisense • sense

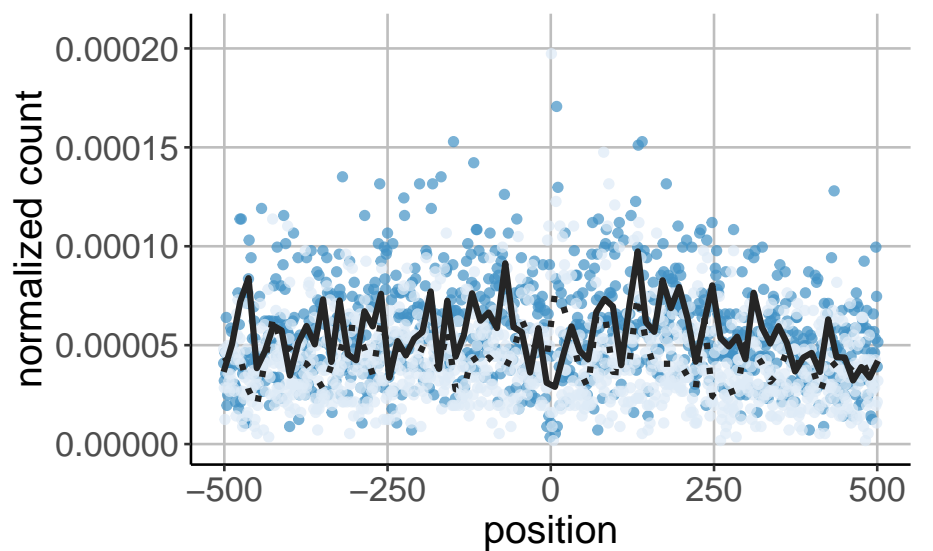

RBMS2-CGUAUAUAG

•• antisense — sense    • antisense • sense

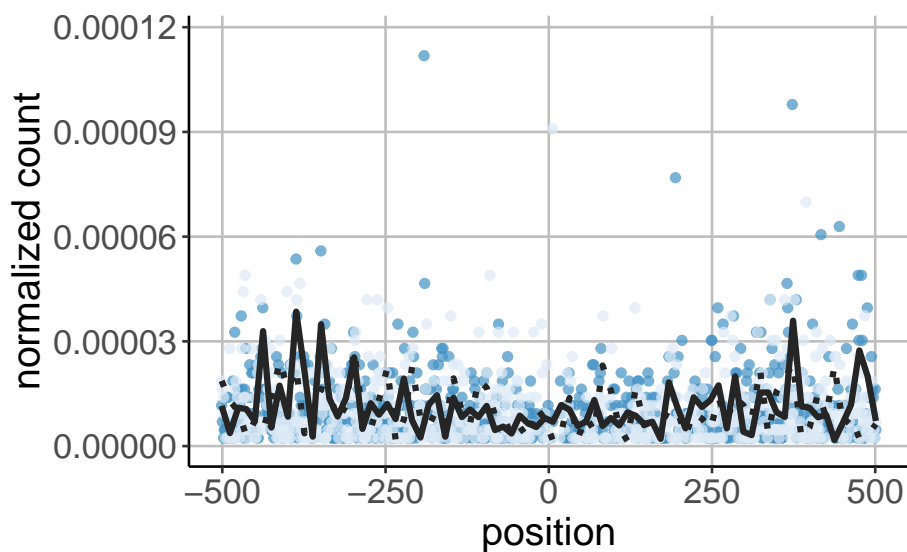

RBMS1-GUAUUUAKNGGG

•• antisense — sense    • antisense • sense

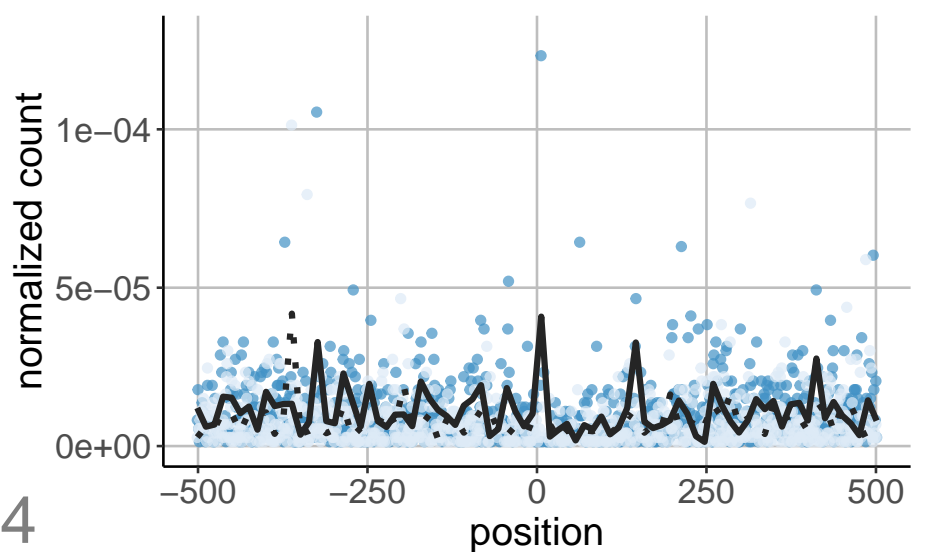

4

STARTcodon

RBMS1-UUAUAAUCAAC

•• antisense — sense    • antisense • sense

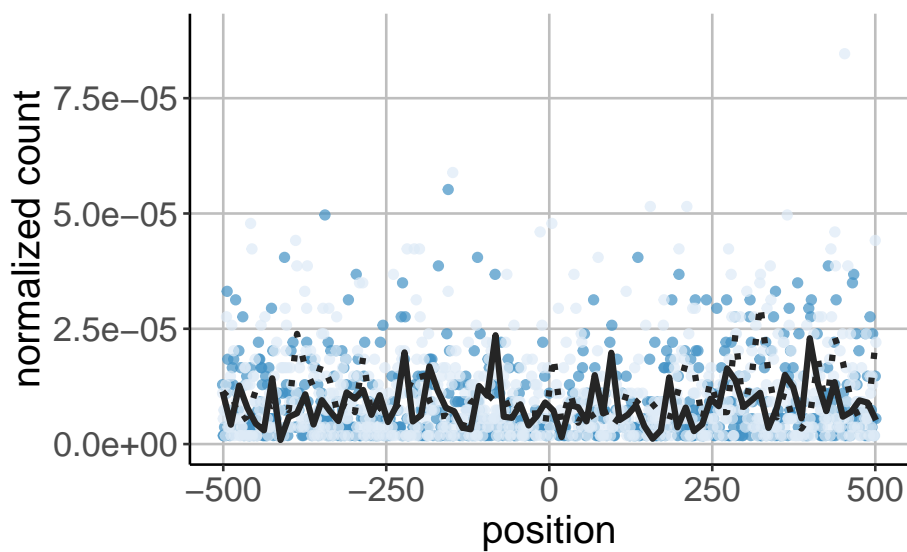

NOVA2\_3-UCAUUCAU

•• antisense — sense    • antisense • sense

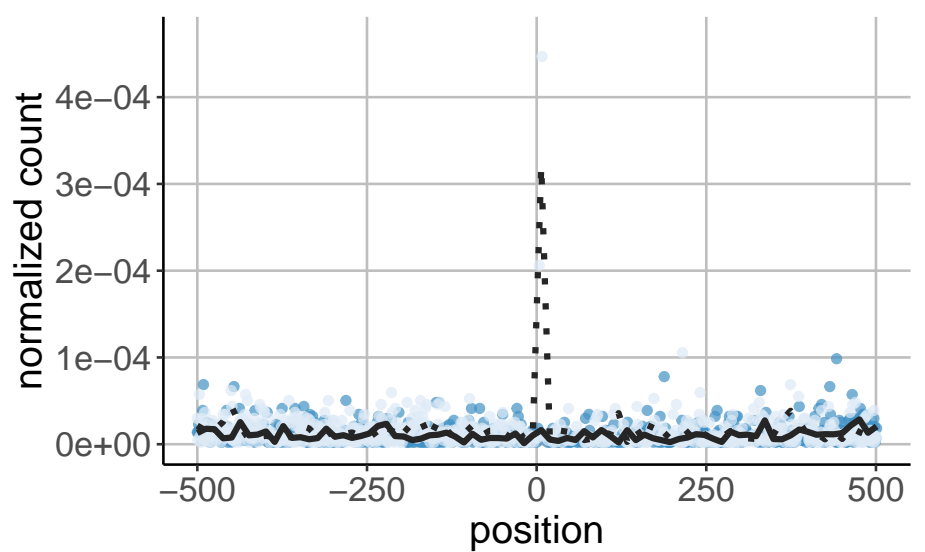

ZFP36-KUAUUUAUGGUGG

•• antisense — sense    • antisense • sense

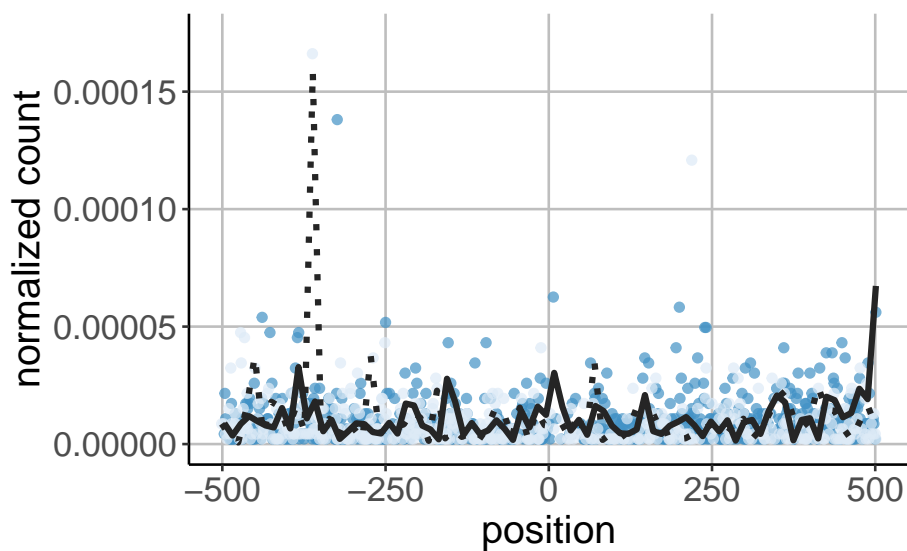

ZFP36-UUAUUUAUU

•• antisense — sense    • antisense • sense

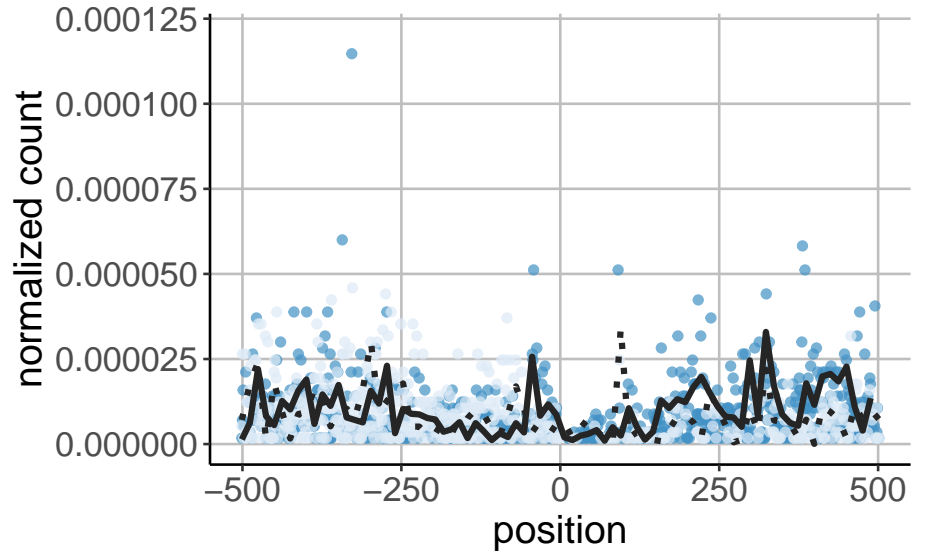

ELAVL4-UUUUAUUUUG

•• antisense — sense    • antisense • sense

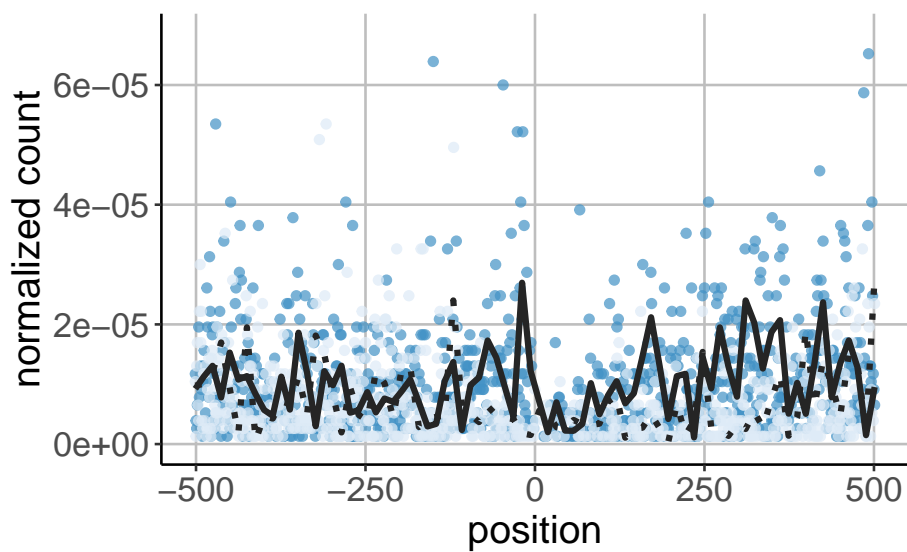

QKI-ACUAACANNACUAACA

•• antisense — sense    • antisense • sense

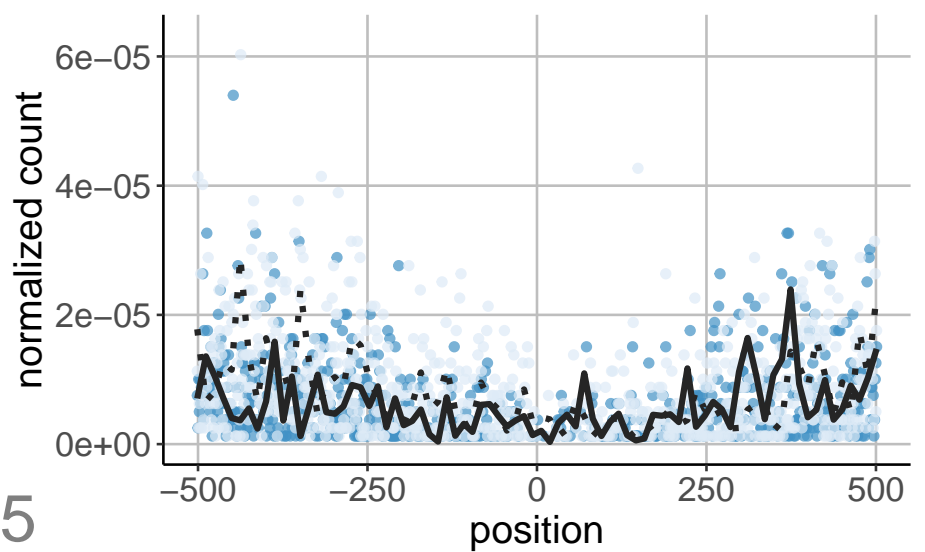

5

STARTcodon

TARDBP-GUGUGAAUGG

•• antisense — sense    • antisense • sense

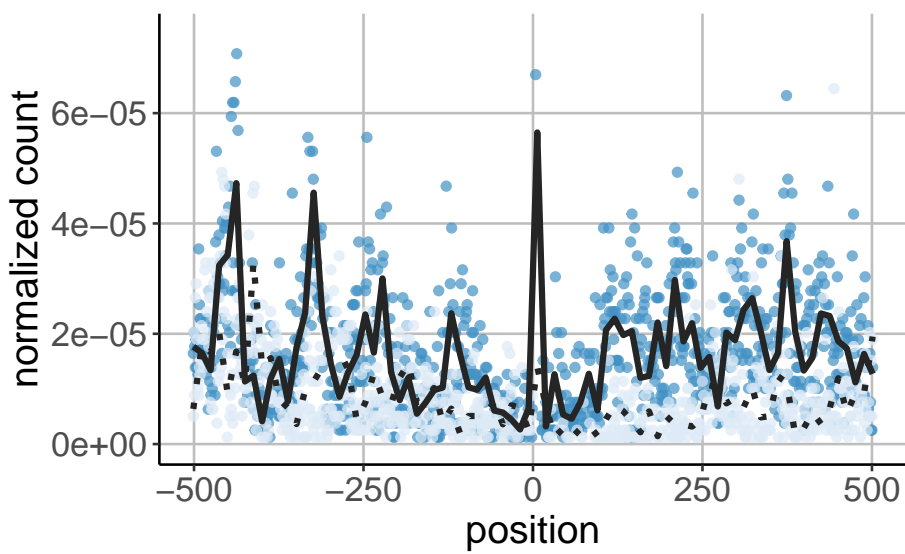

TARDBP-GUGUGNGUGUG

•• antisense — sense    • antisense • sense

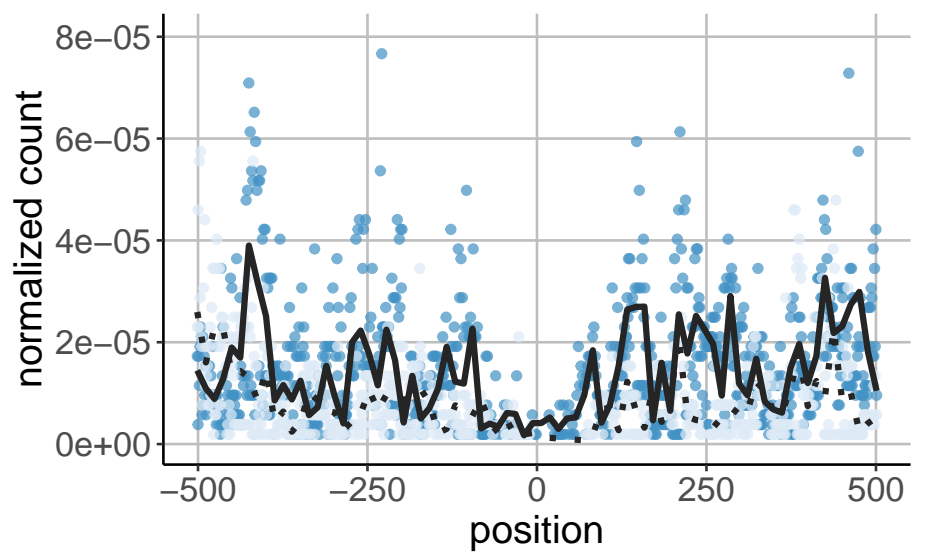

PUM2-NNUGUAYAGK

•• antisense — sense    • antisense • sense

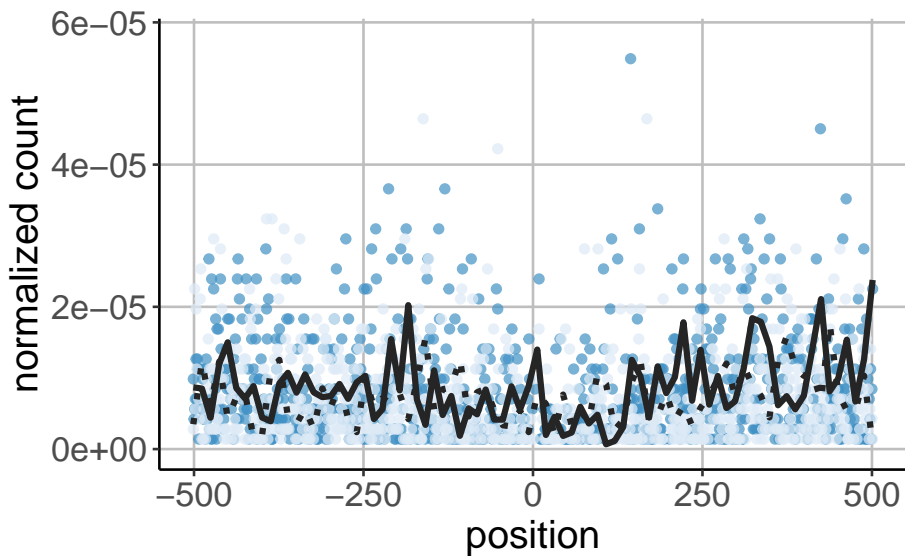

PUM2-NUGUAAAUAGKN

•• antisense — sense    • antisense • sense

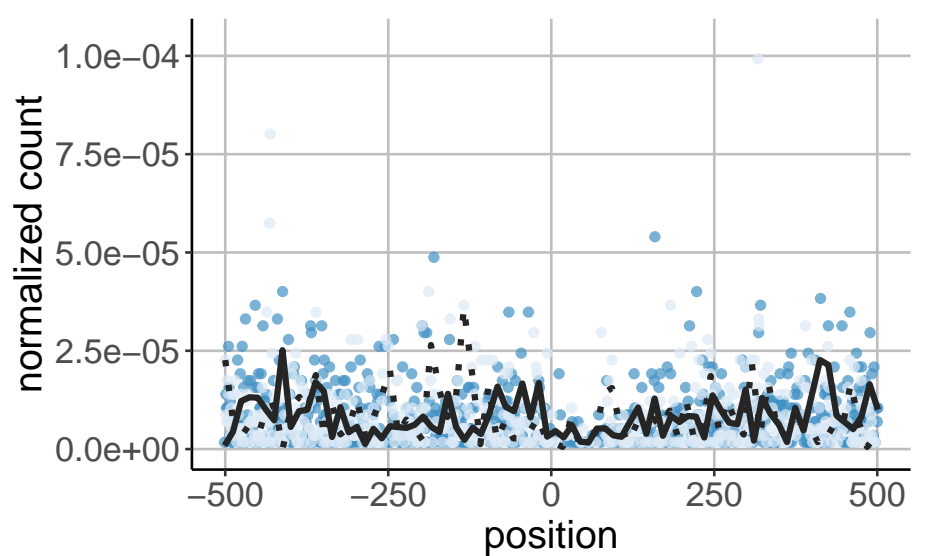

KHDRBS3-UAAANNNNNNNNUAAA

•• antisense — sense    • antisense • sense

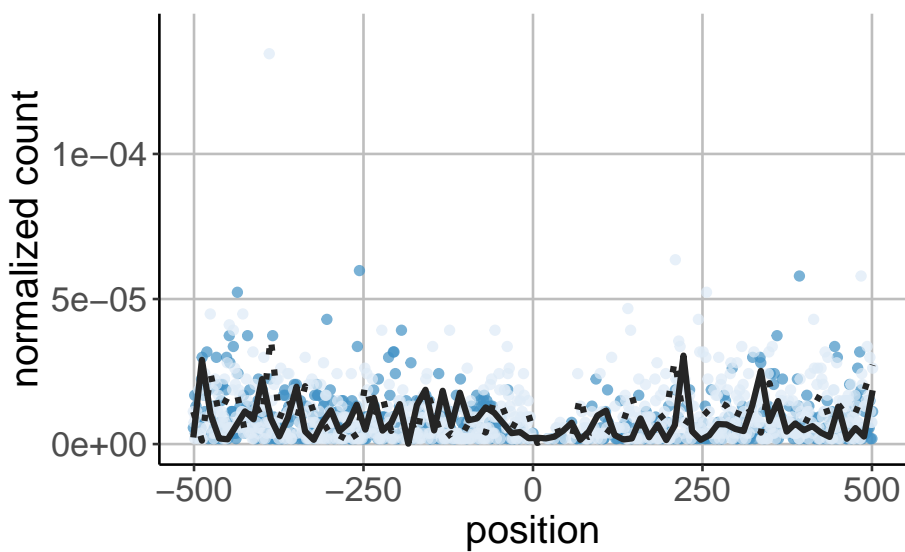

THUMPD1-UUCGUGGCUUG

•• antisense — sense    • antisense • sense

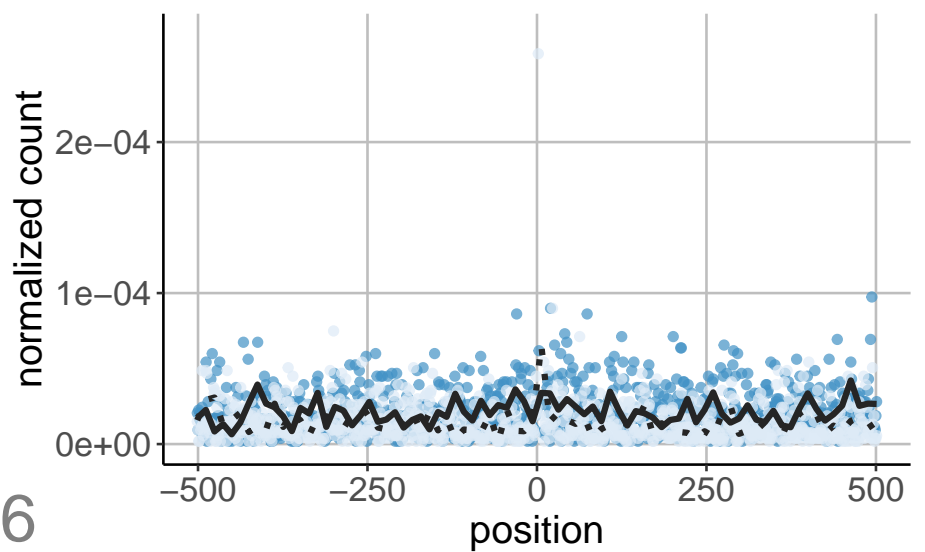

6

STARTcodon

THUMPD1-WGCGCGGUYUU

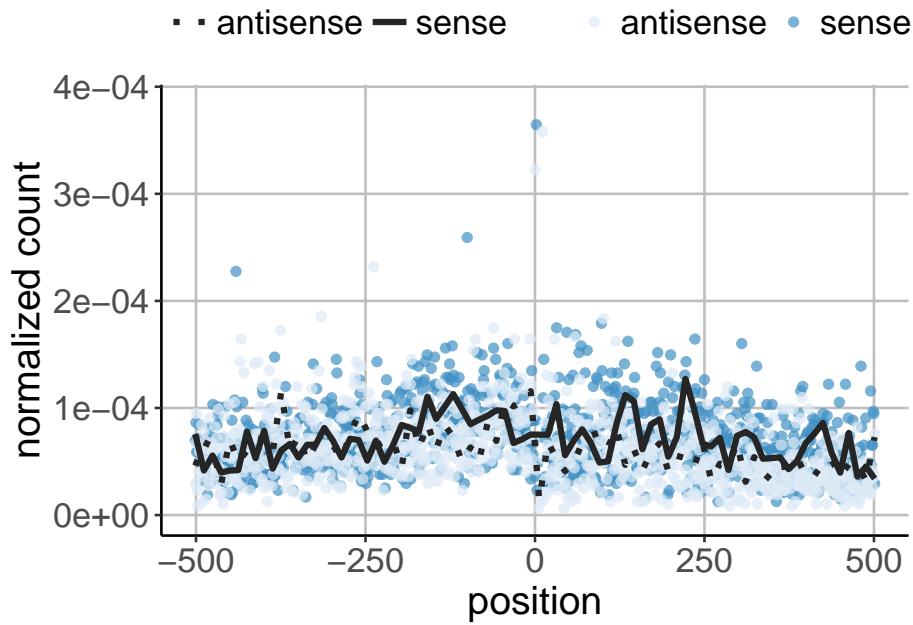

ZFR\_4-GGCACGGAUG

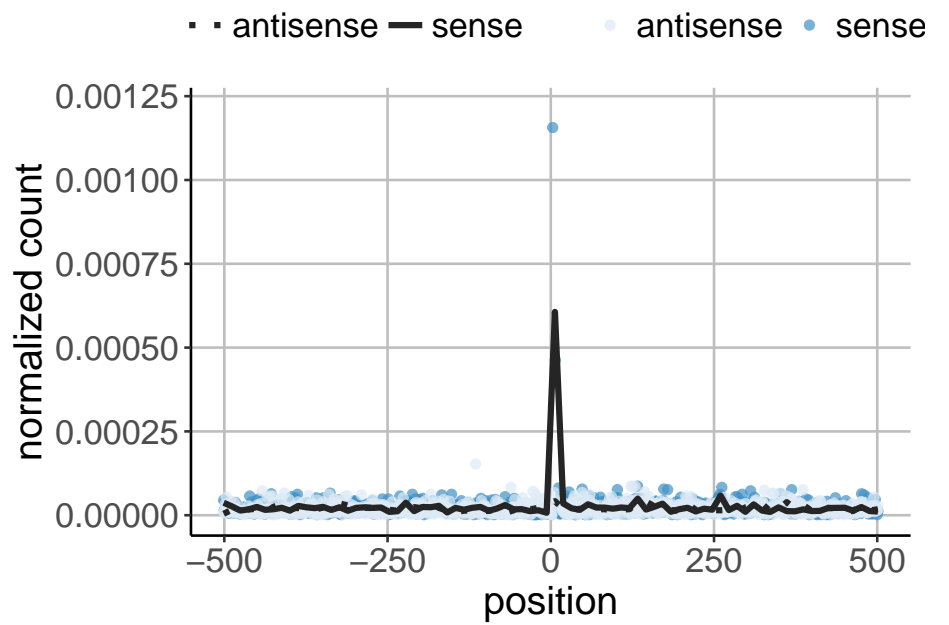

ZFR\_4-UUGCCGGAUGYCGU

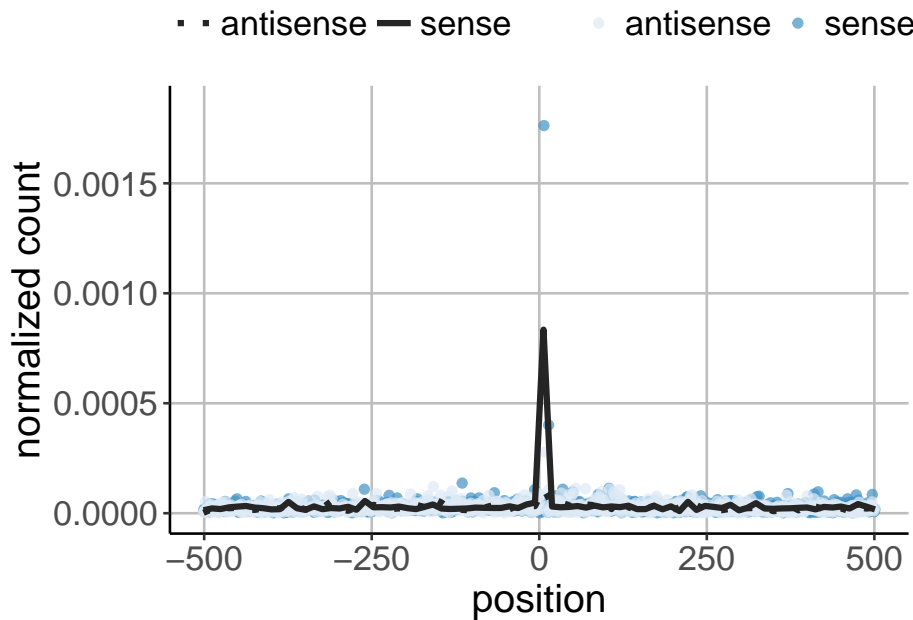

PCBP1-UCCUUNNCCUU

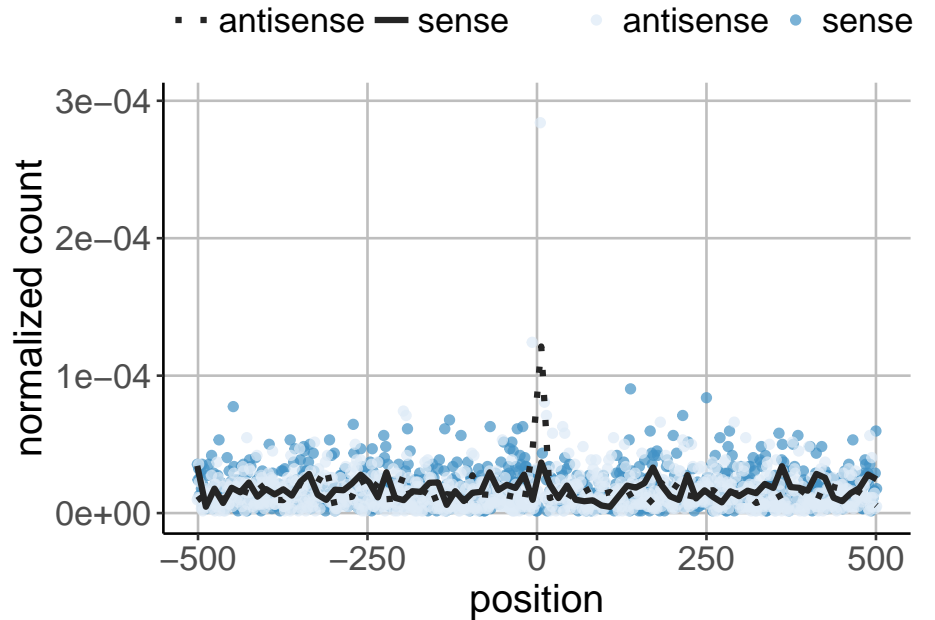

HNRNPA3-UAGGUUAGGG

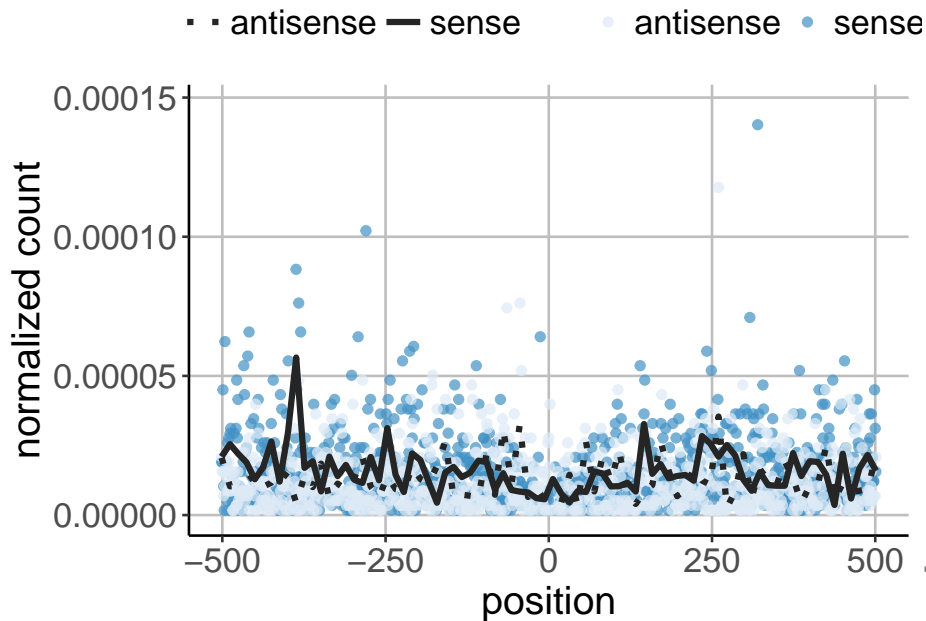

RBM38-KKGUGUGUGUGUKK

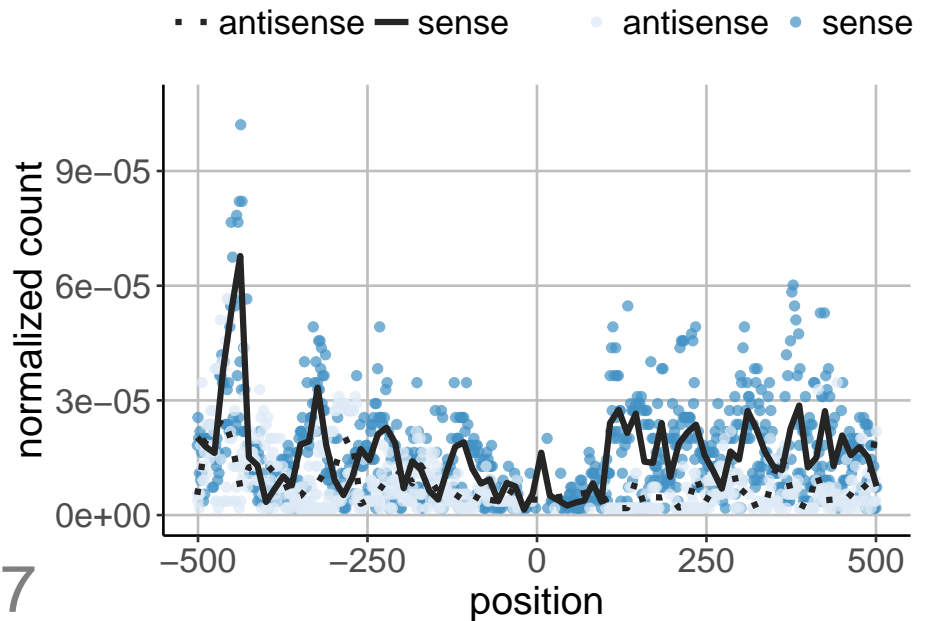



STARTcodon

MEX3D-UNURUUUAUU

•• antisense — sense    • antisense • sense

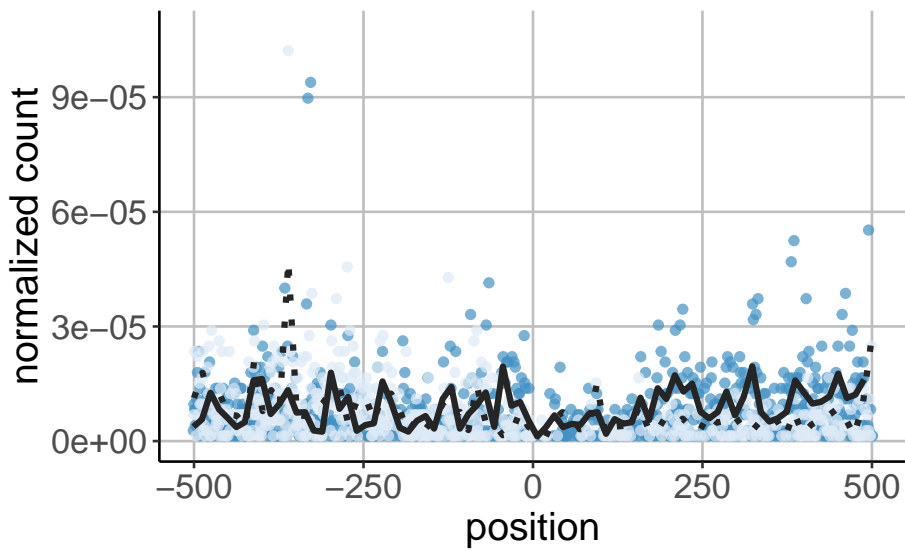

RBPM52-CACAGNGCACA

•• antisense — sense    • antisense • sense

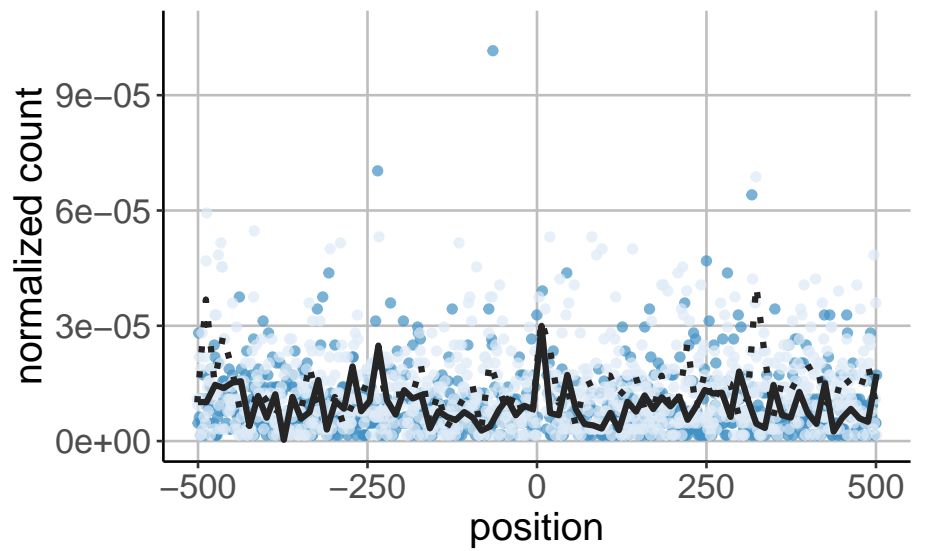

RBPM52-UCACRUGCACA

•• antisense — sense    • antisense • sense

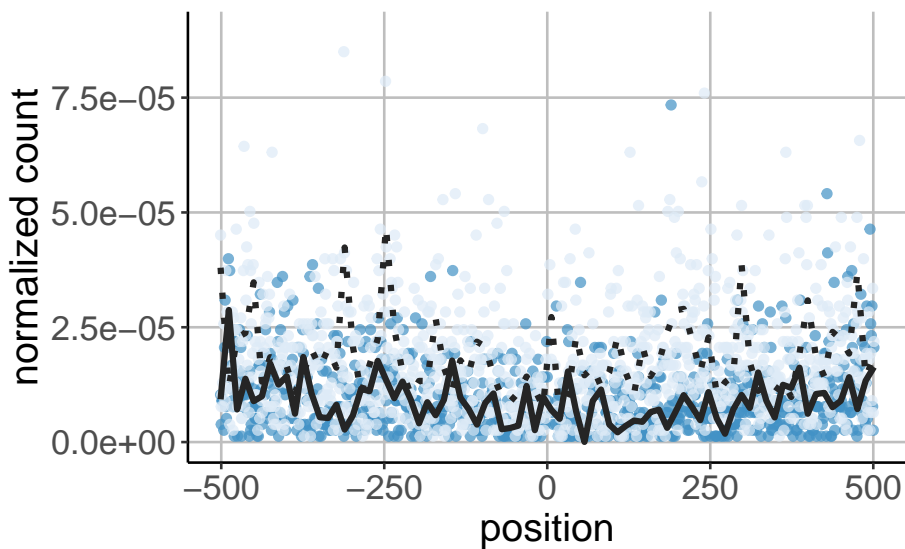

RBPM52-UGCACA

•• antisense — sense    • antisense • sense

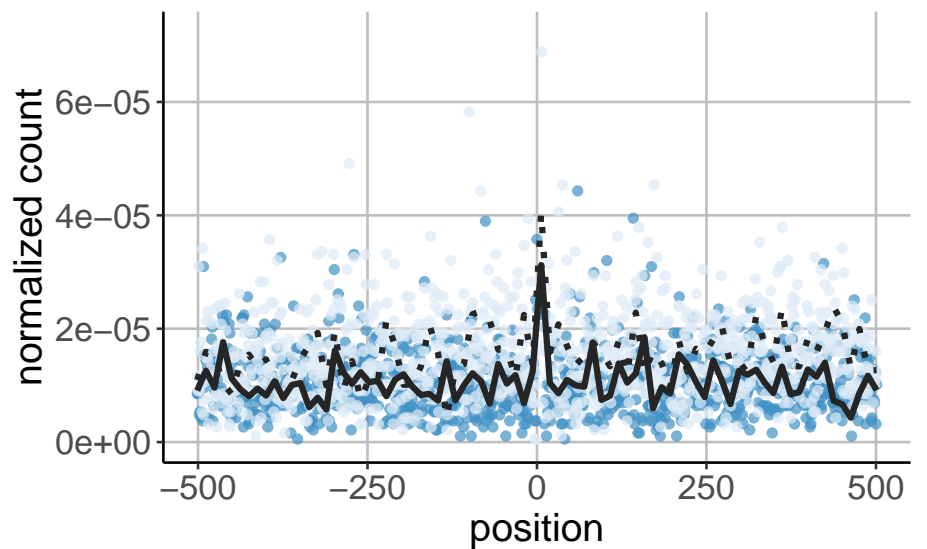

YBX2-GCCAUNNNAUCGC

•• antisense — sense    • antisense • sense

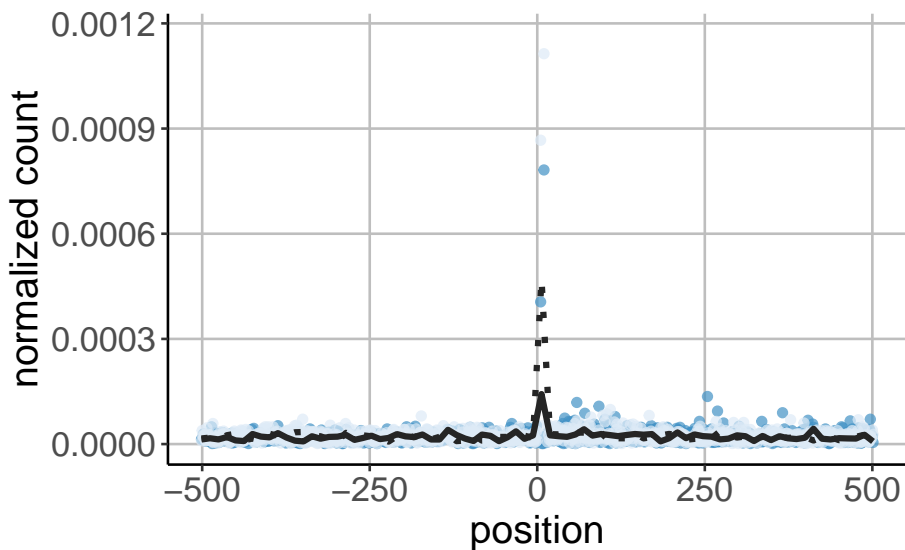

YBX2-NUAACAUCNN

•• antisense — sense    • antisense • sense

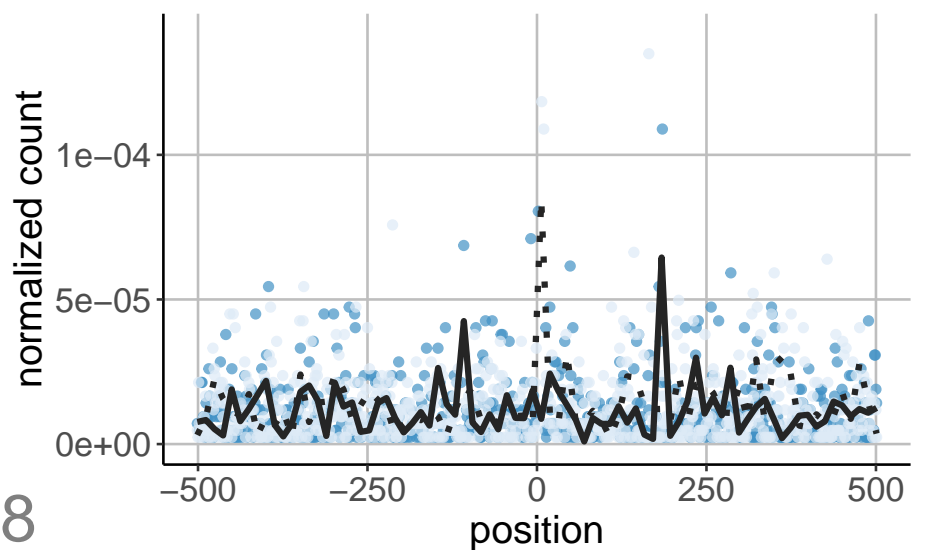

STARTcodon

CSTF2T-CGUAGCGUCU

• antisense — sense    • antisense • sense

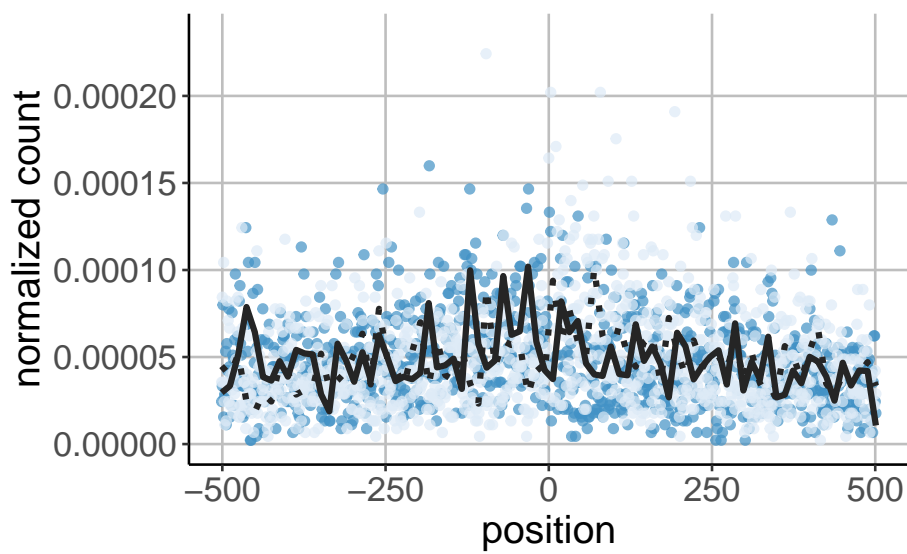

SNRNP70-GNUCANGNNG

• antisense — sense    • antisense • sense

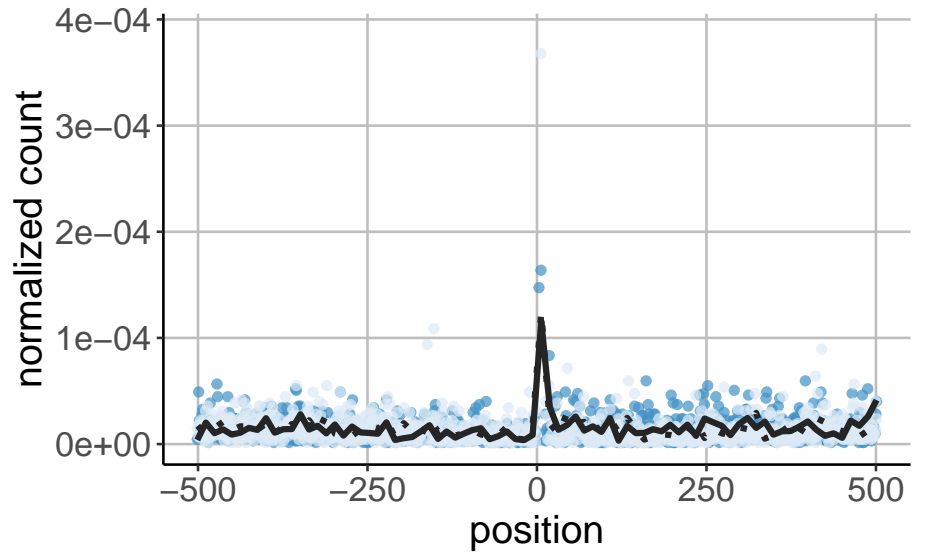

SNRNP70-GUUCAAGGUG

• antisense — sense    • antisense • sense

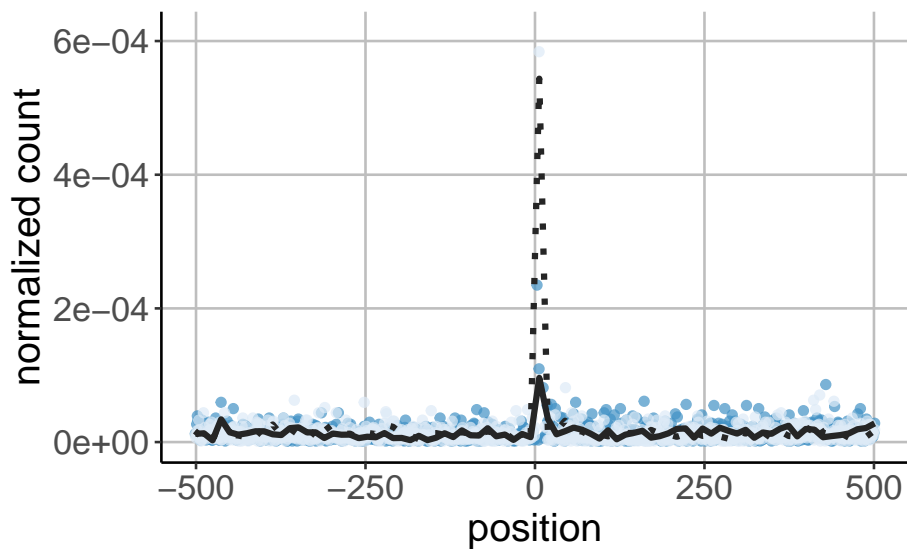

DAZ4-GYUCUAGUUAGYAUC

• antisense — sense    • antisense • sense

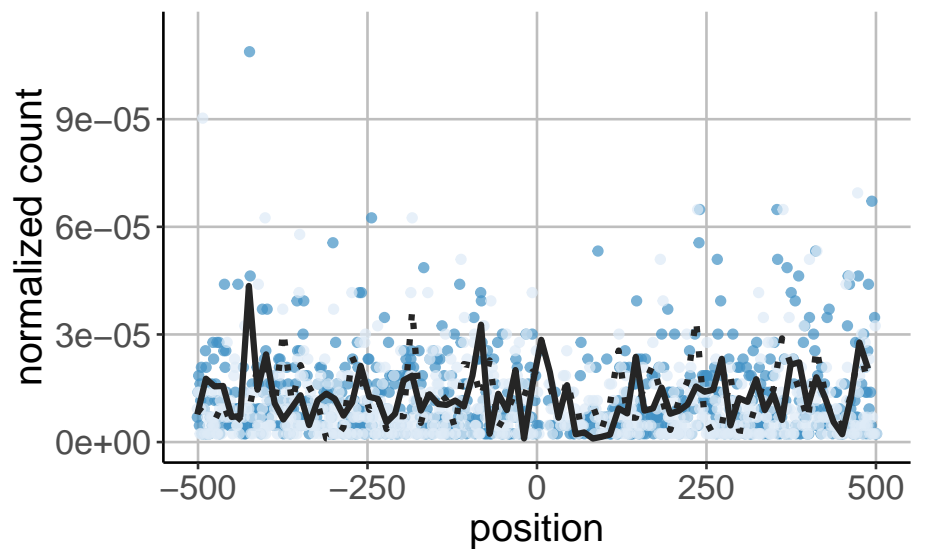

IGF2BP1-CAGNUWCA

• antisense — sense    • antisense • sense

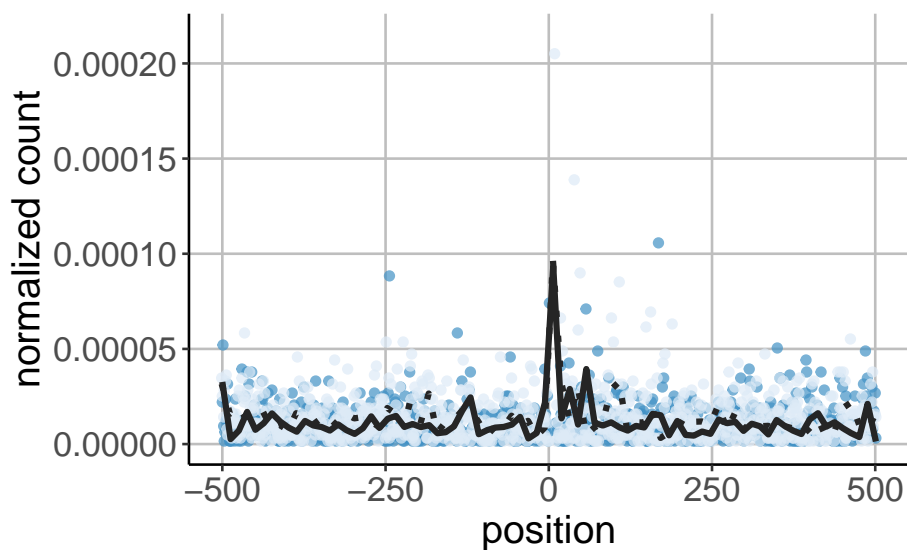

HEXIM2-NGCGACGGKN

• antisense — sense    • antisense • sense

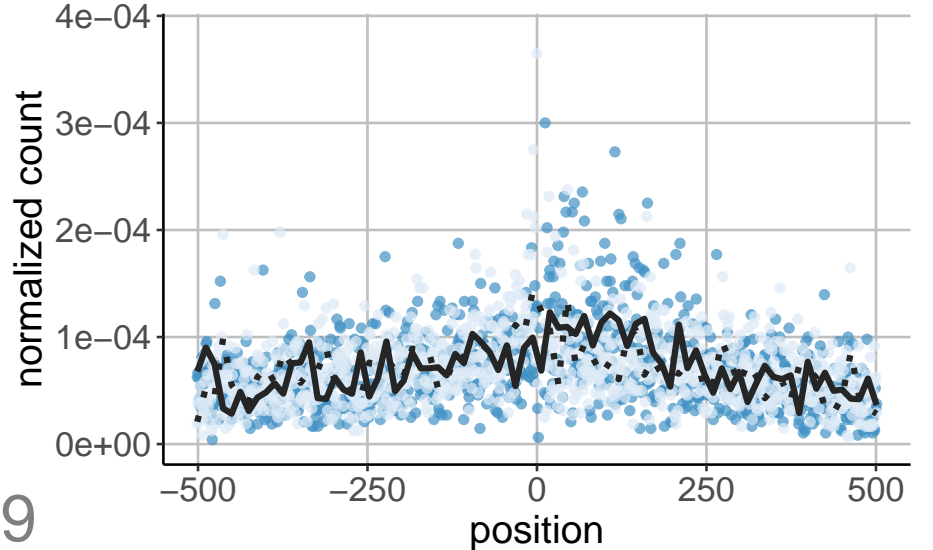

9

STARTcodon

YBX1-NUAACAUCGGG

•• antisense — sense    • antisense • sense

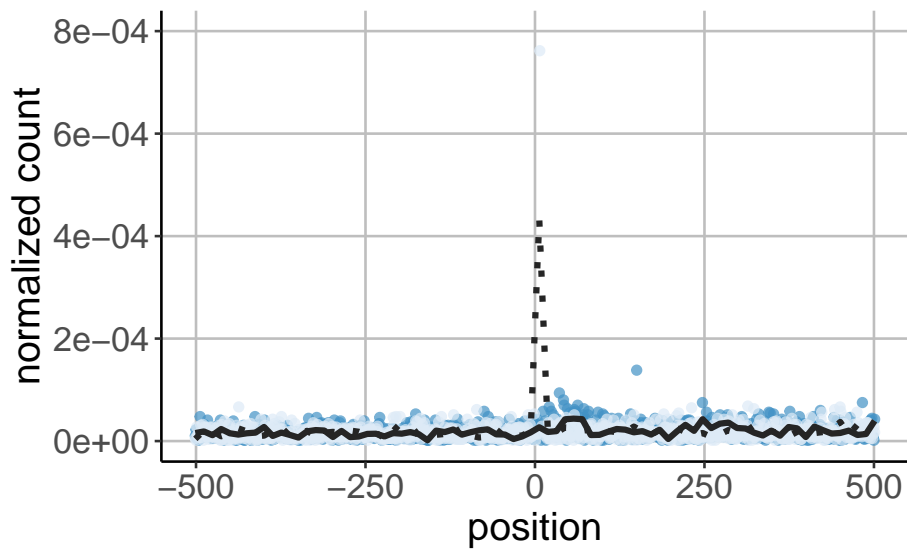

RBM24-GUGUGNGUGUG

•• antisense — sense    • antisense • sense

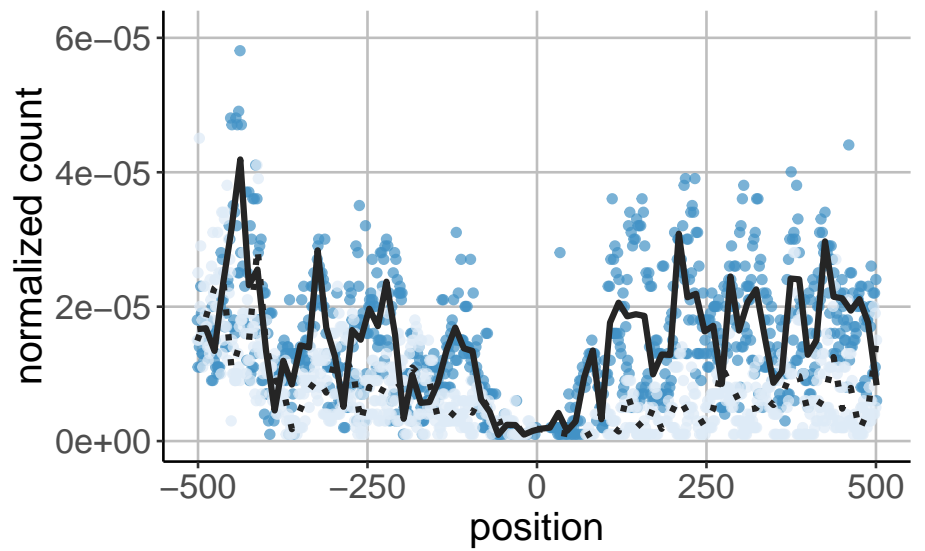

CSDA-UAACAUCA

•• antisense — sense    • antisense • sense

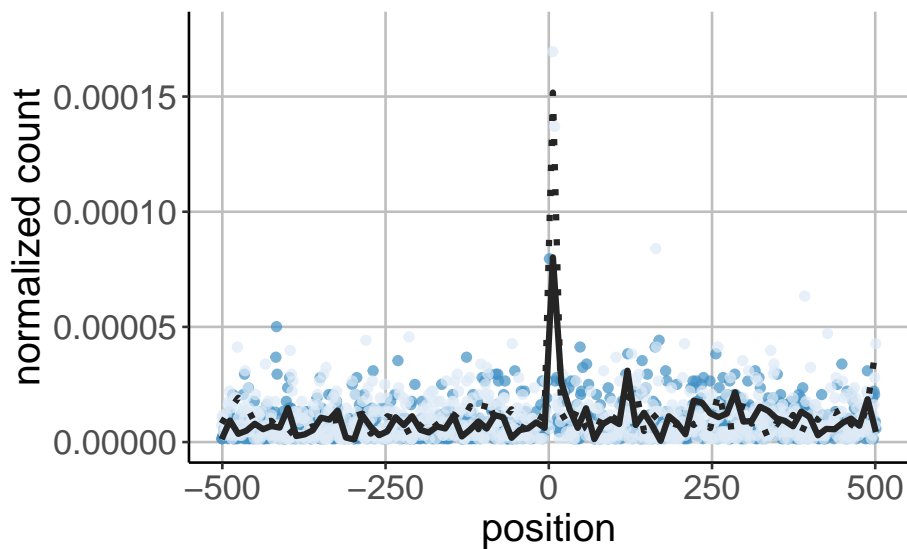

HNRNPA1L2-NUAGGUUAGGGW

•• antisense — sense    • antisense • sense

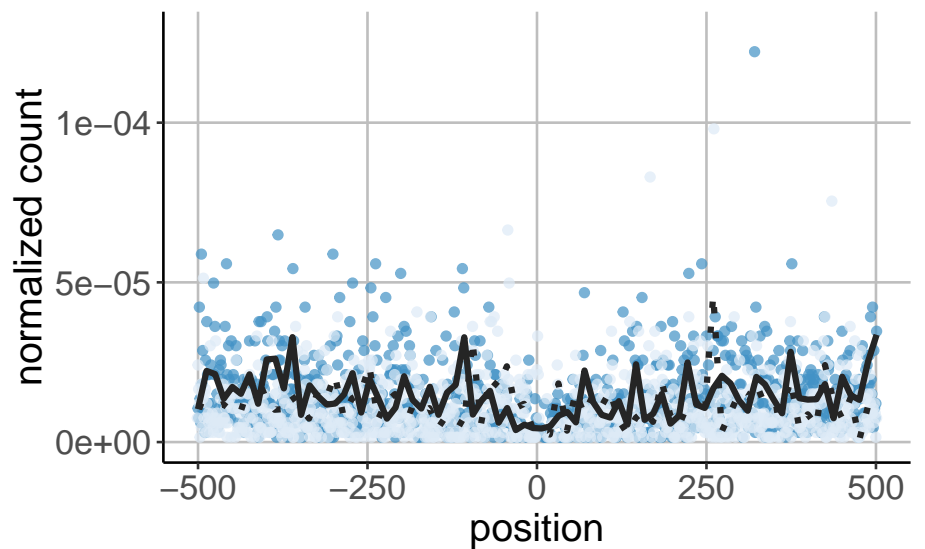

ZC3H12B-NGCGNCAGUCGGUAGCN

•• antisense — sense    • antisense • sense

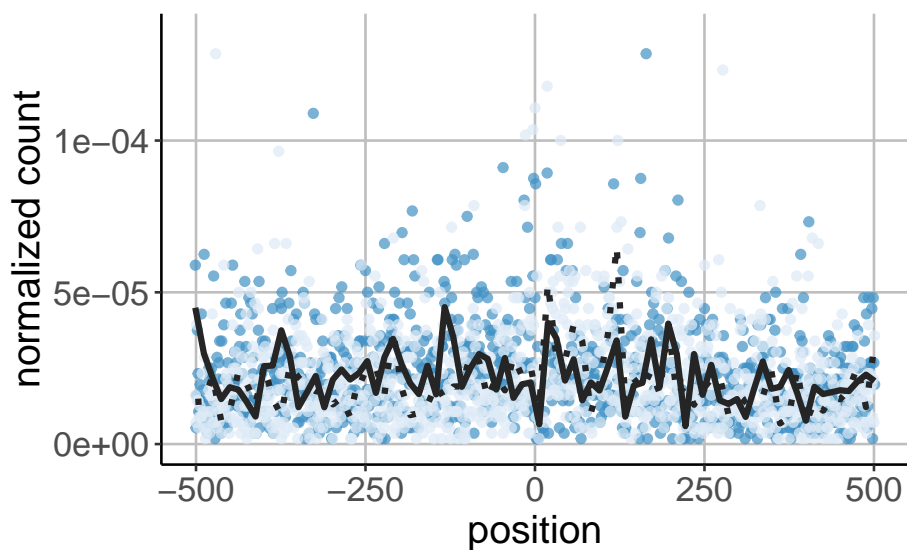

ZC3H12A-NUUGCCAWAGUKU

•• antisense — sense    • antisense • sense

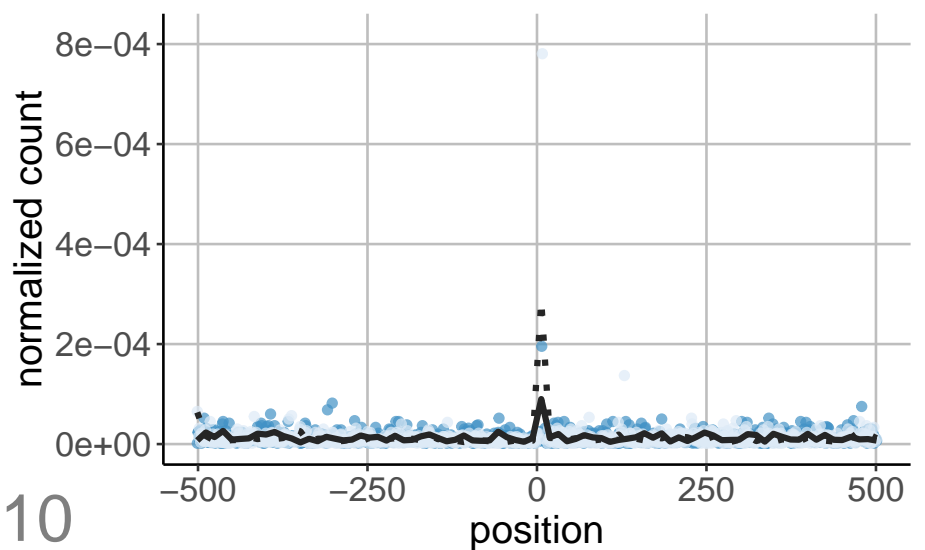

10

STARTcodon

DAZAP1-UUAGGUUAGG

•• antisense — sense    • antisense • sense

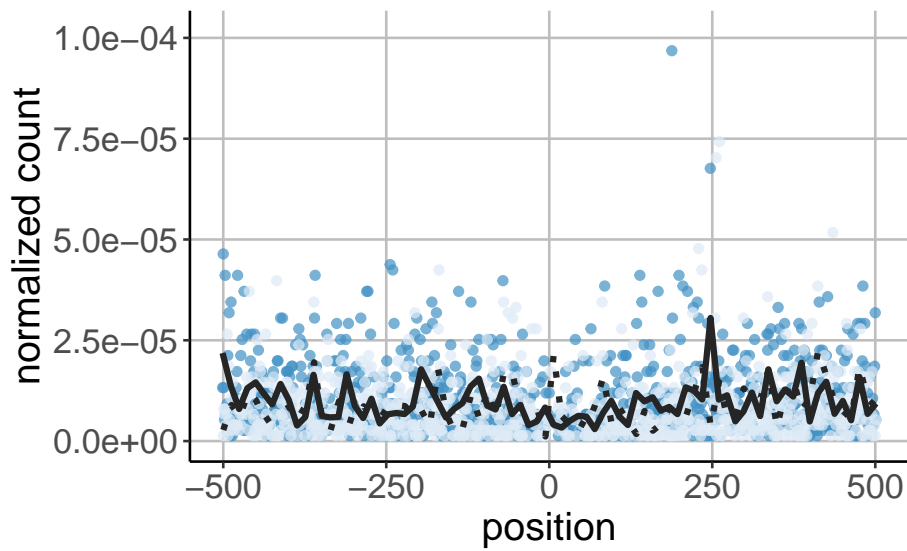

CARHSP1-GCCAUGAUGAU

•• antisense — sense    • antisense • sense

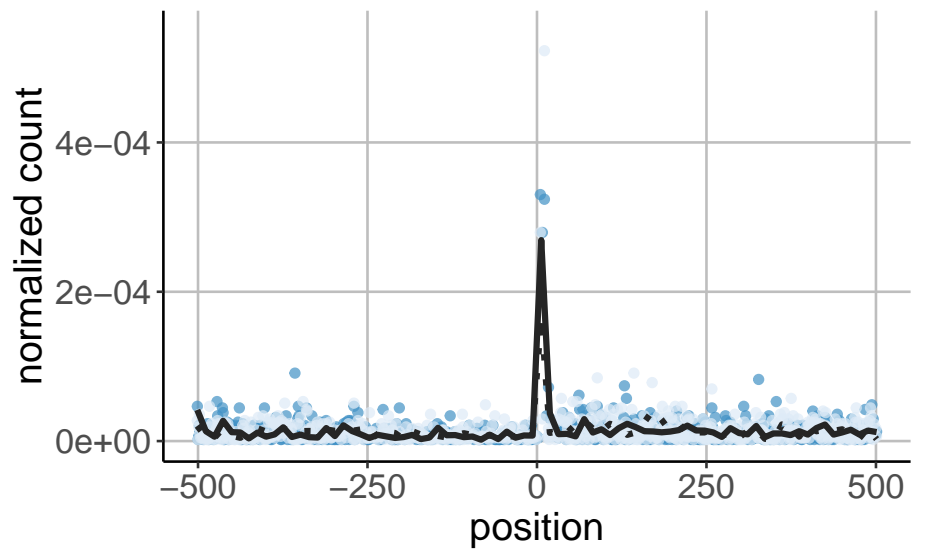

CARHSP1-UUGCCUUGUCCCGAU

•• antisense — sense    • antisense • sense

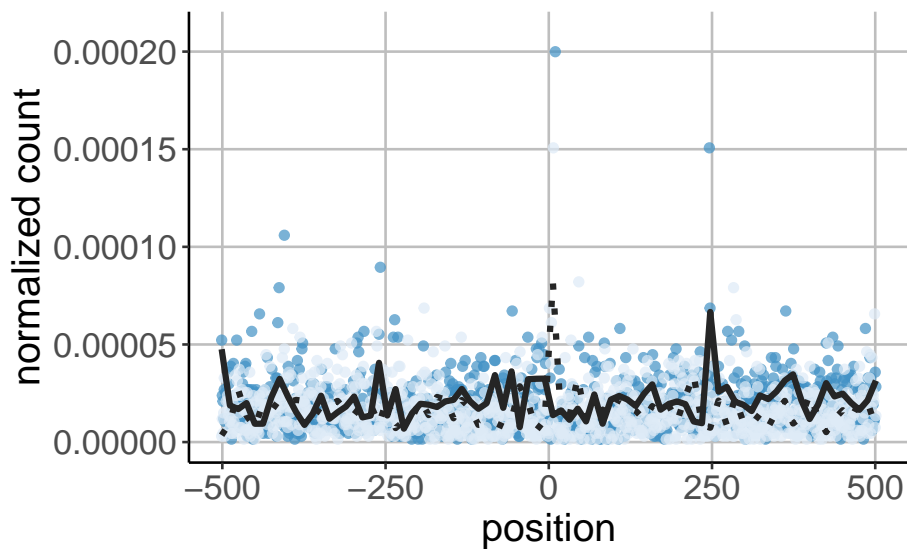

RNPC3-GGGUSUACGGGU

•• antisense — sense    • antisense • sense

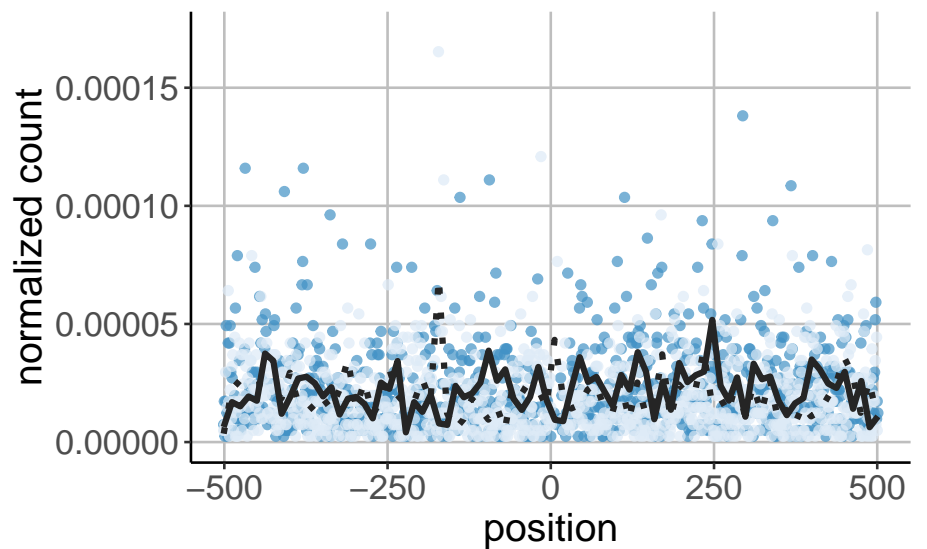

ELAVL1-UUUAUGNUUU

•• antisense — sense    • antisense • sense

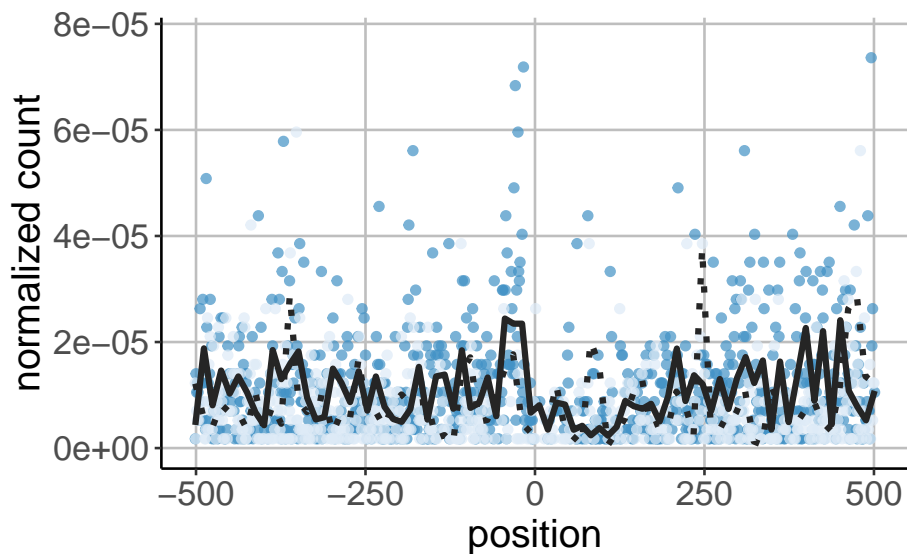

RBM46-GUGAUUG

•• antisense — sense    • antisense • sense

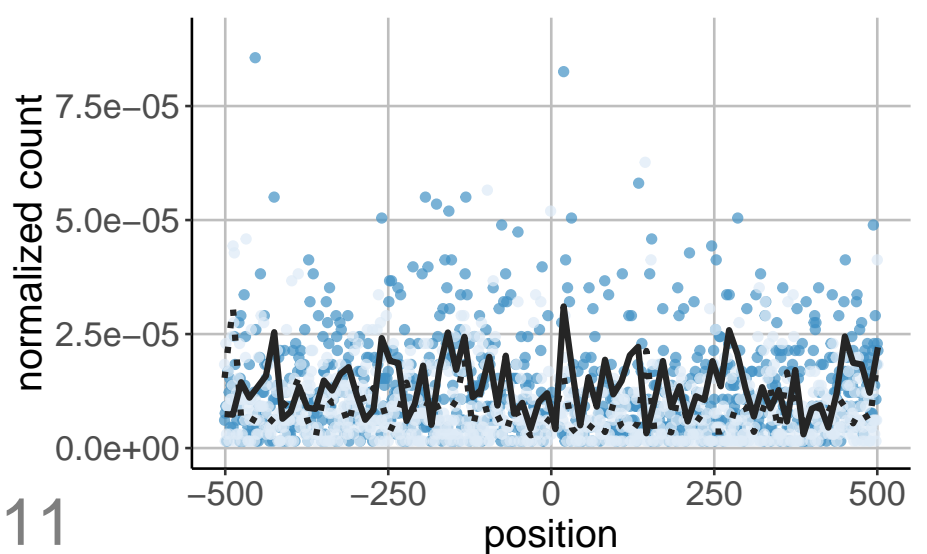

STARTcodon

ESRP1\_3-GGUGUGGUGU

•• antisense — sense    • antisense • sense

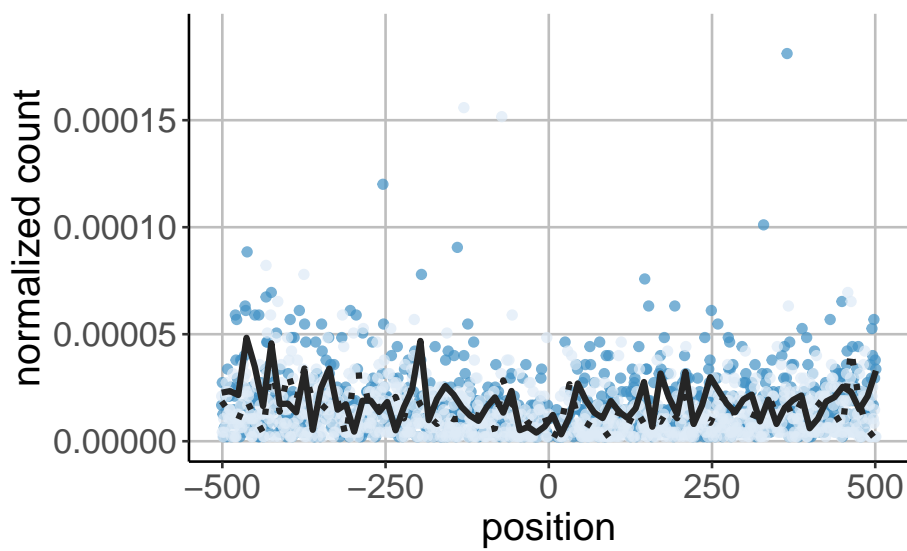

SNRPB2-GGGUGUGCAC

•• antisense — sense    • antisense • sense

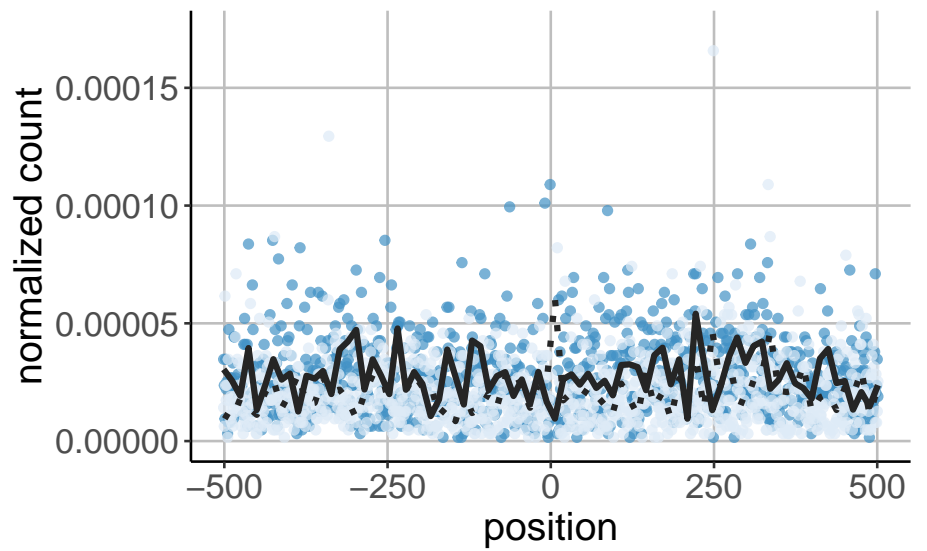

SNRPB2-NNCAUUGCACN

•• antisense — sense    • antisense • sense

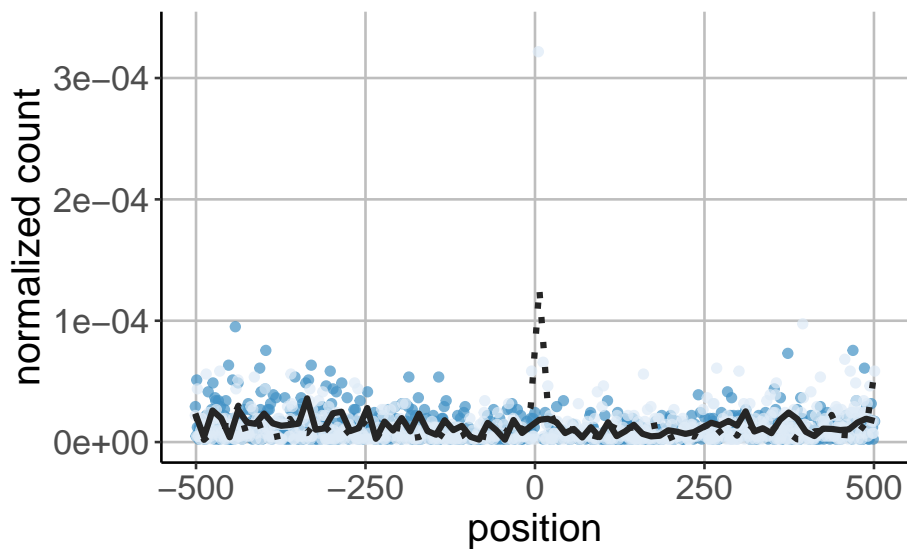

MEX3C-NNAGAGUUUAUNN

•• antisense — sense    • antisense • sense

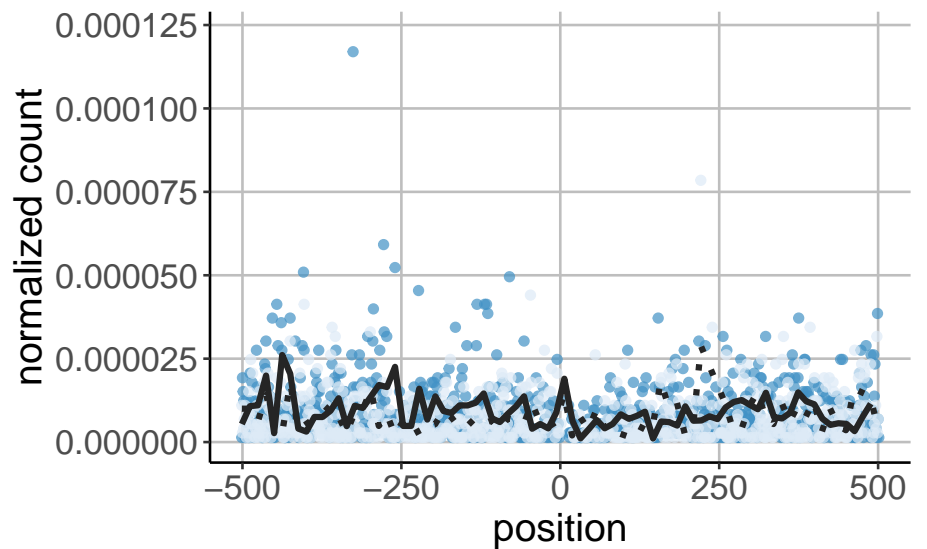

HNRNPA0-KUAGKUUAGGK

•• antisense — sense    • antisense • sense

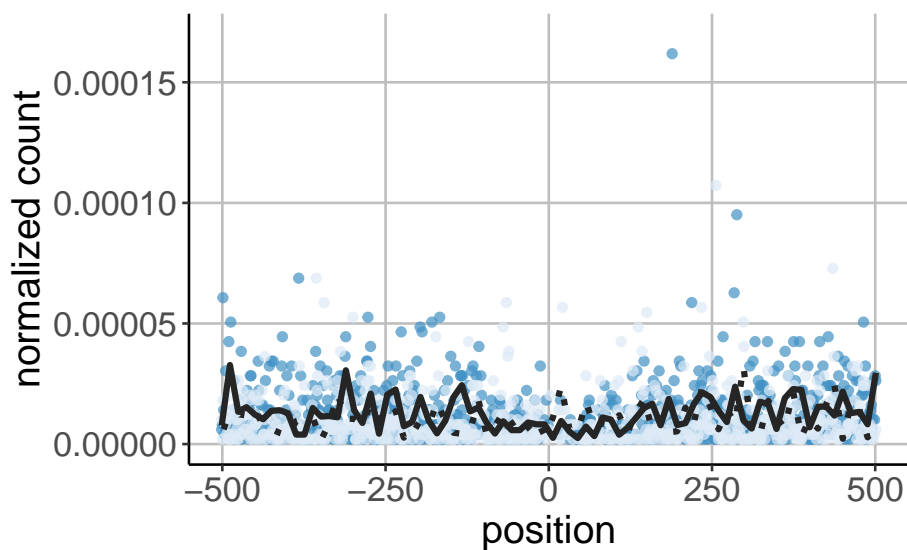

HNRNPA0-KUAGKUUUAGGK

•• antisense — sense    • antisense • sense

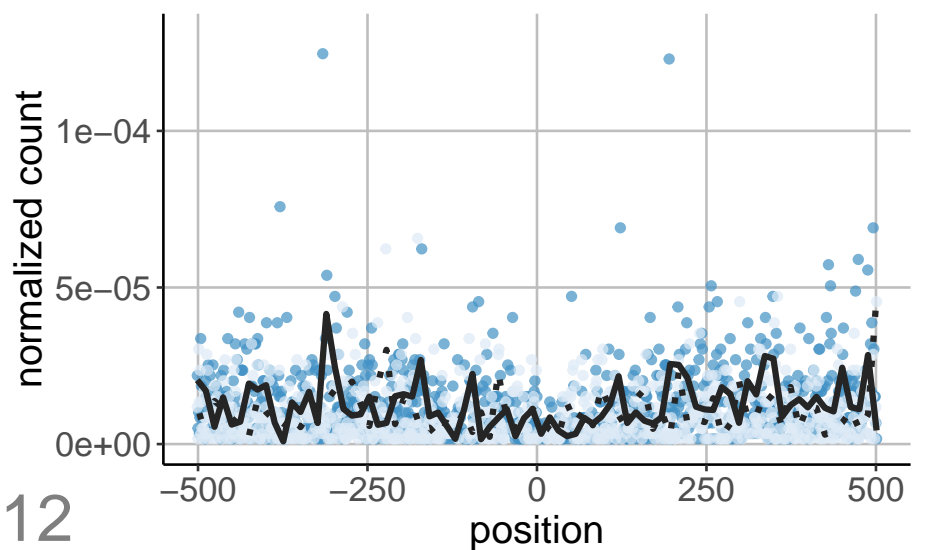

STARTcodon

SNRPA-CAUUGCACN

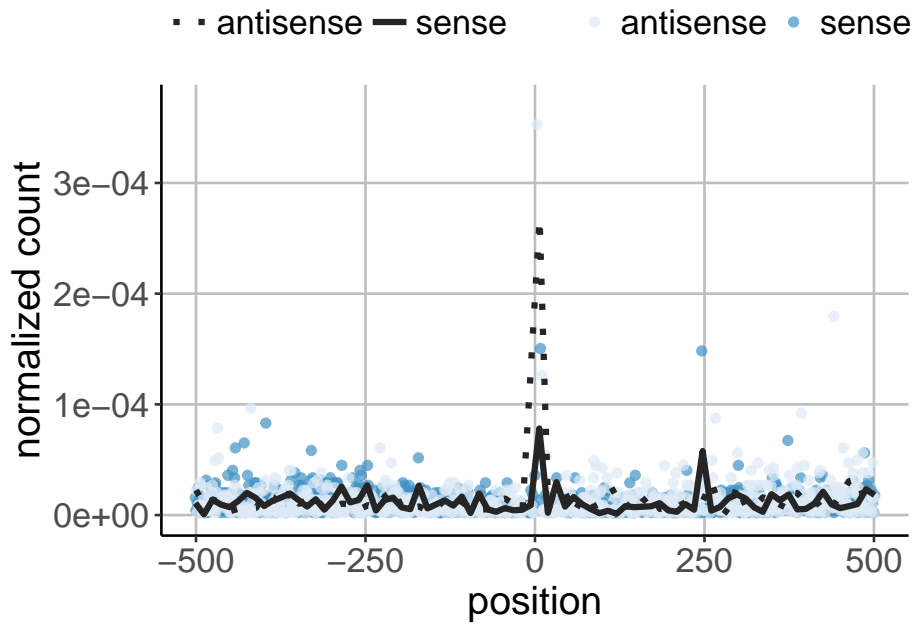

SNRPA-NUGCACR

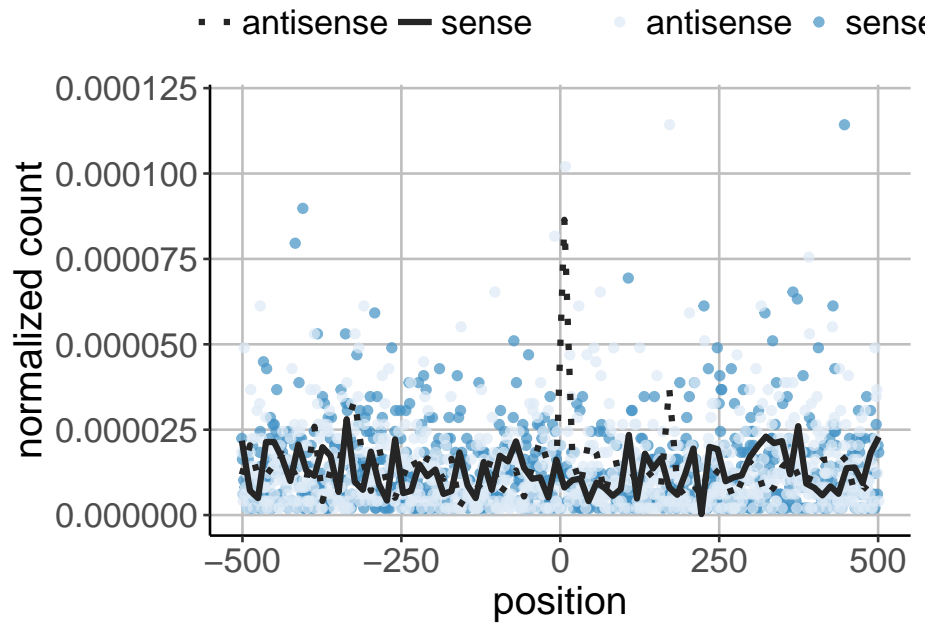

MEX3B\_3-UAGAGUUUUAU

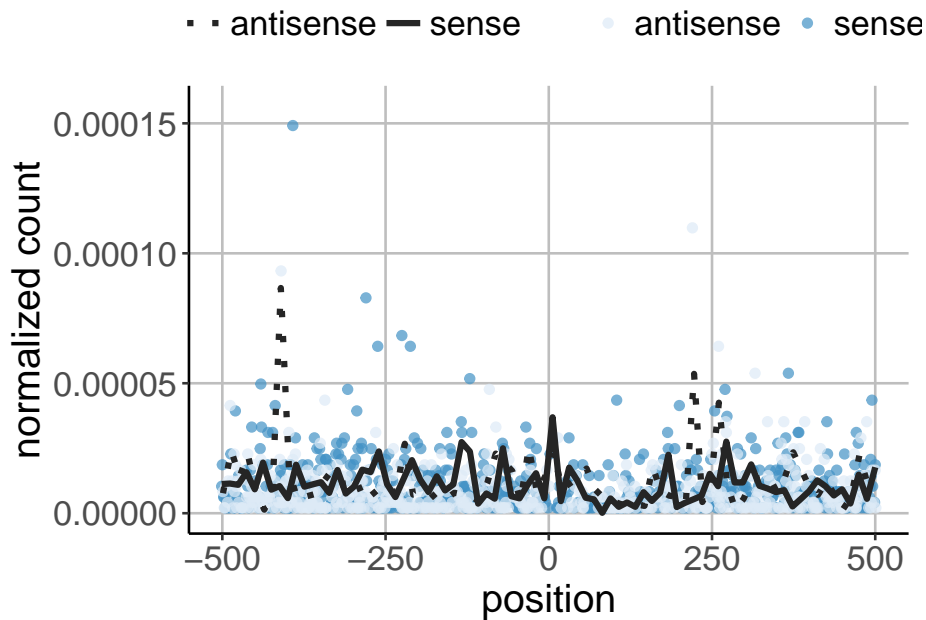

MEX3B\_3-UAUUUUAU

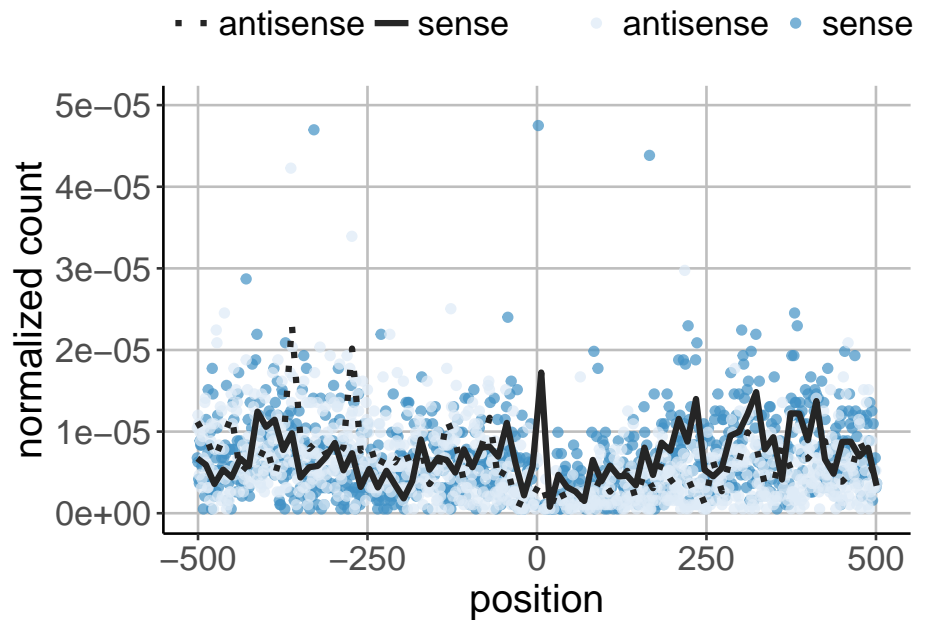

KHDRBS2-UAAACAAUAA

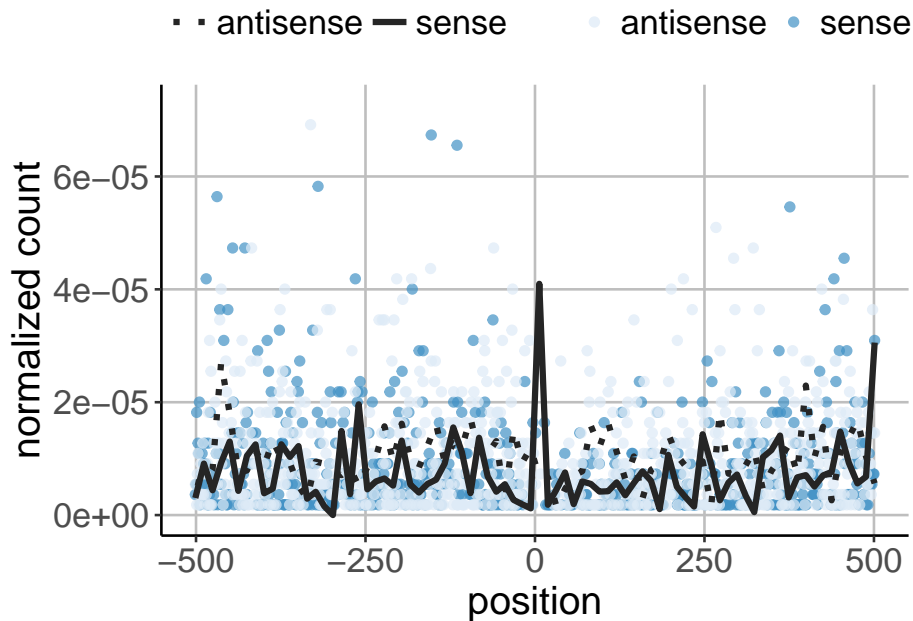

CELF3\_2-UGUGUNUGUGU

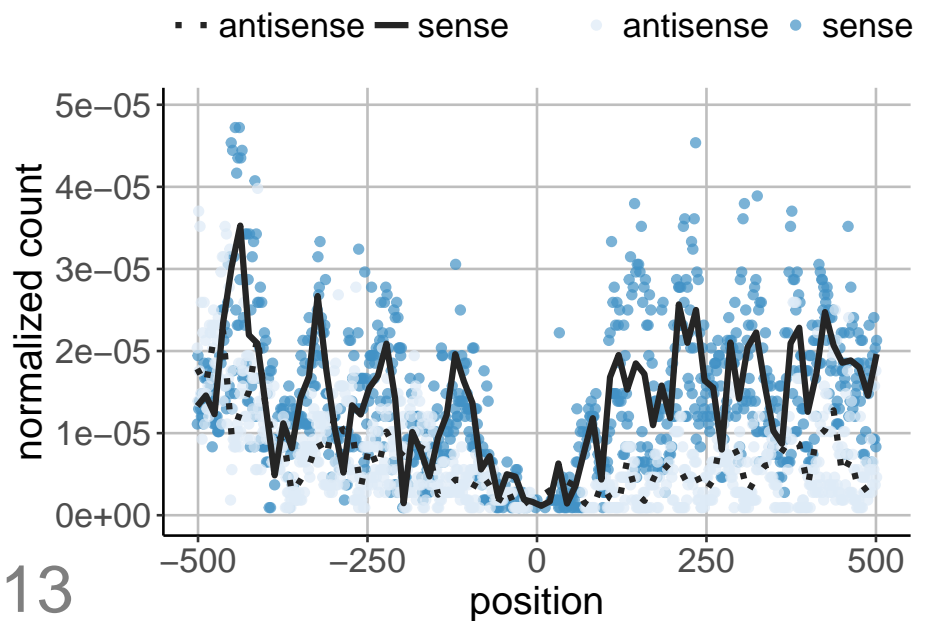

13

STARTcodon

RNPC3-GGGDDGGGDKUACKKGGK

•• antisense — sense    • antisense • sense

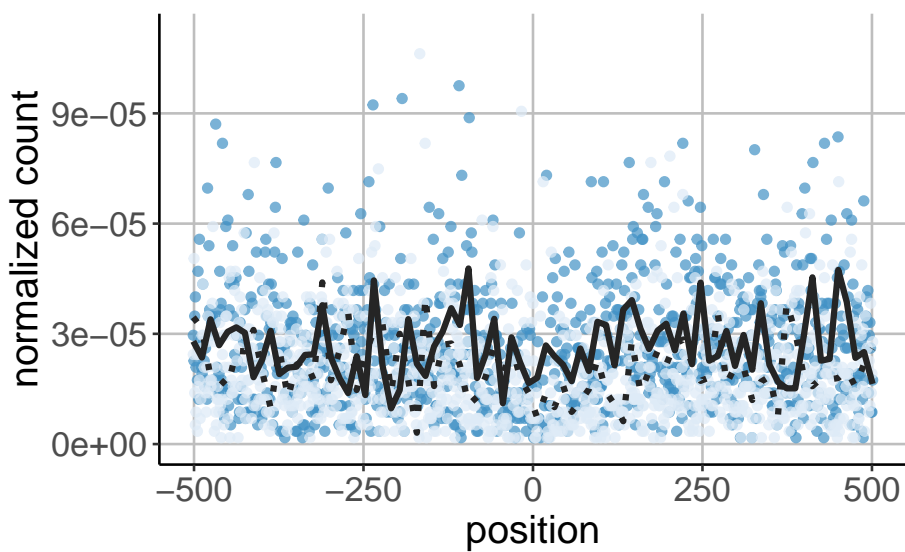

RBM14-UGCGUCG

•• antisense — sense    • antisense • sense

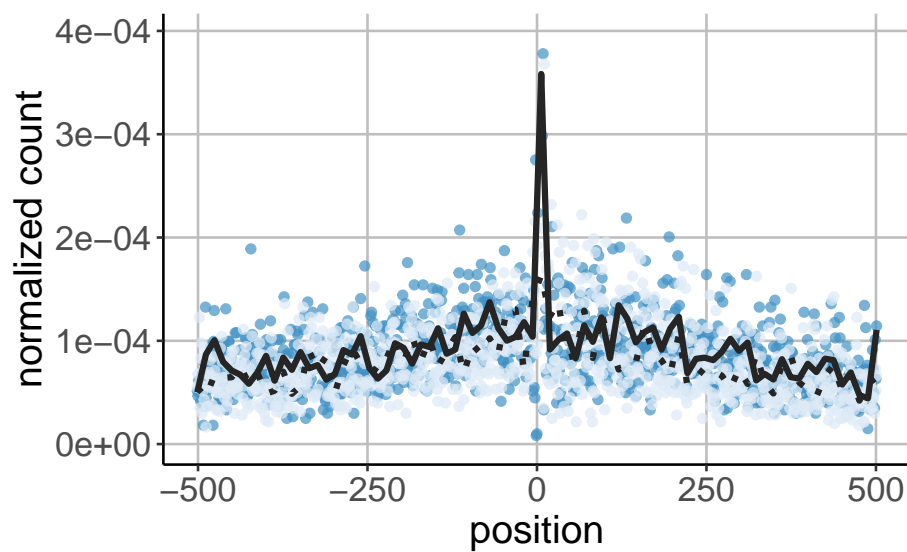

CELF4-UGUGUUGUGU

•• antisense — sense    • antisense • sense

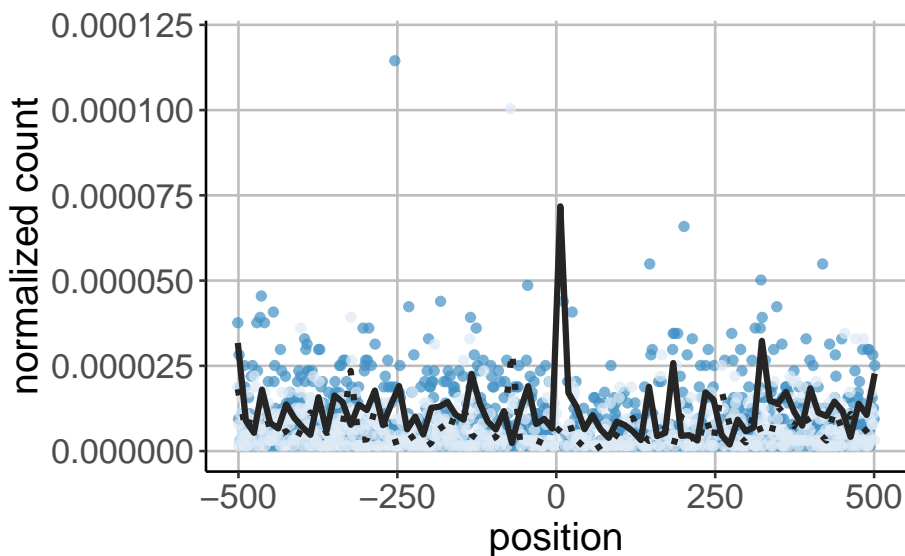

ZRANB2-NNNGGUAAGGUNN

•• antisense — sense    • antisense • sense

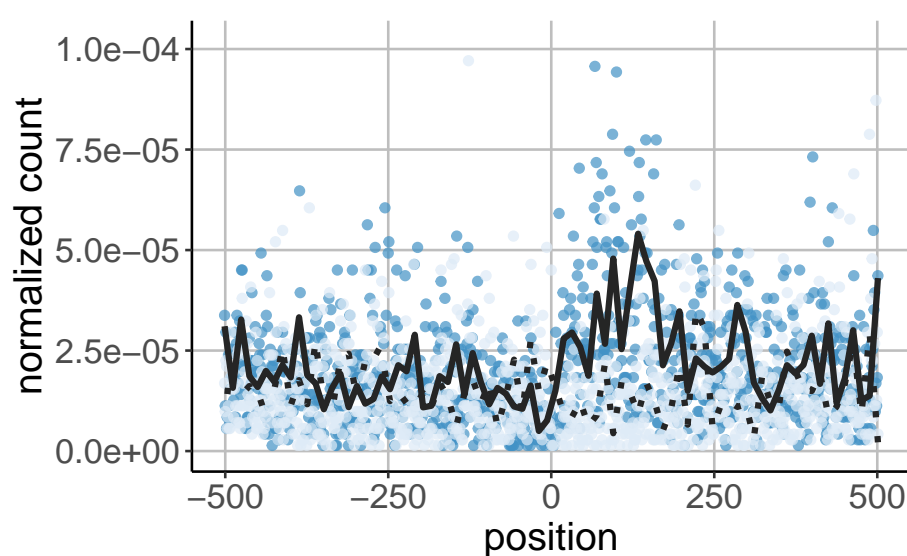

RBM4-CGGGGURUGN

•• antisense — sense    • antisense • sense

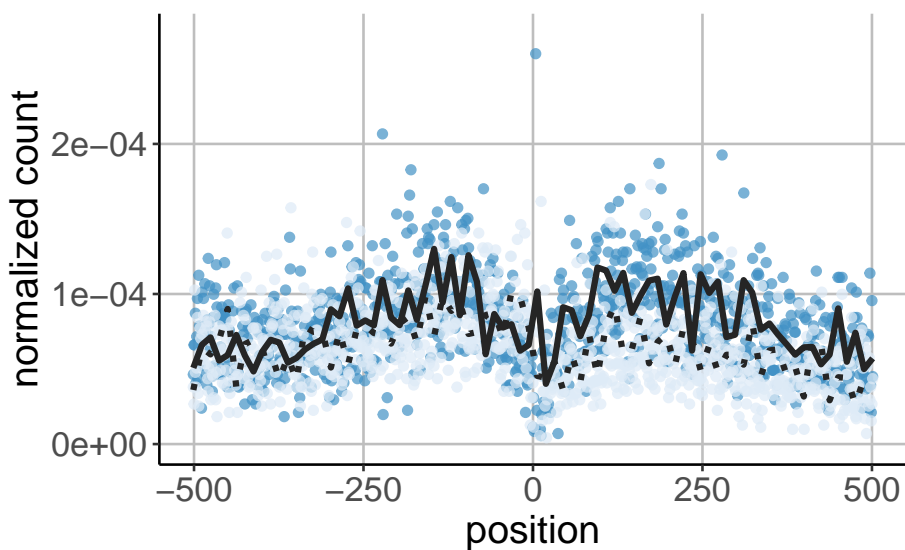

RPMS-NAGGCACR

•• antisense — sense    • antisense • sense

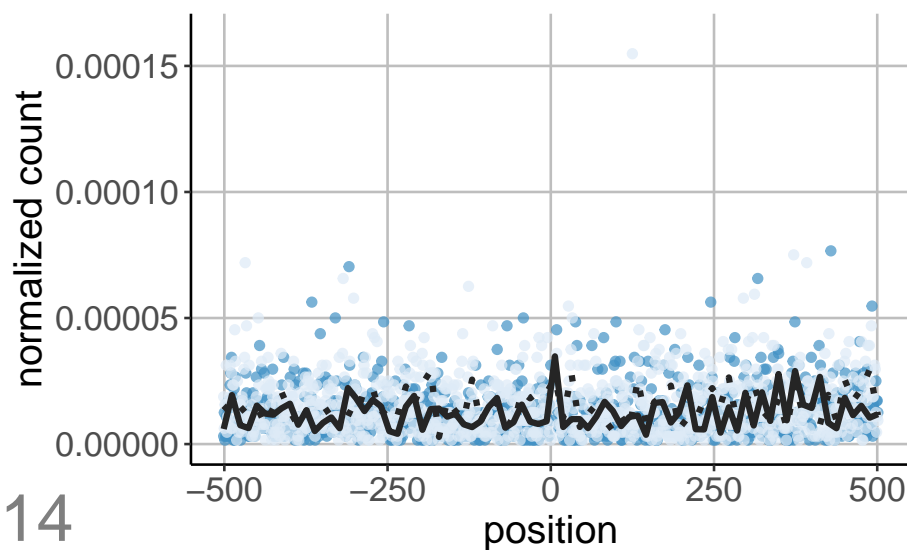

STARTcodon

RBPMS-UCACGNGCACN

•• antisense — sense    • antisense • sense

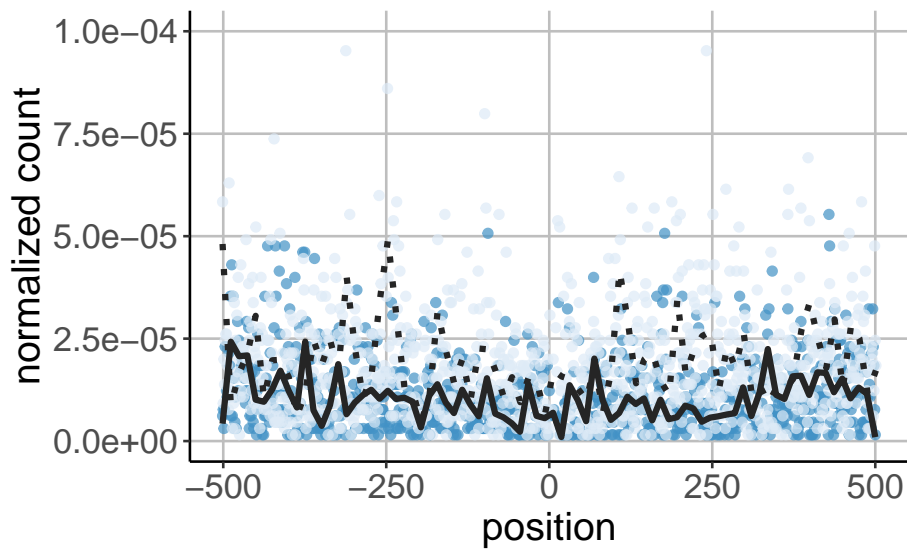

CELF1\_2-UGUGUNUGUGU

• antisense • sense

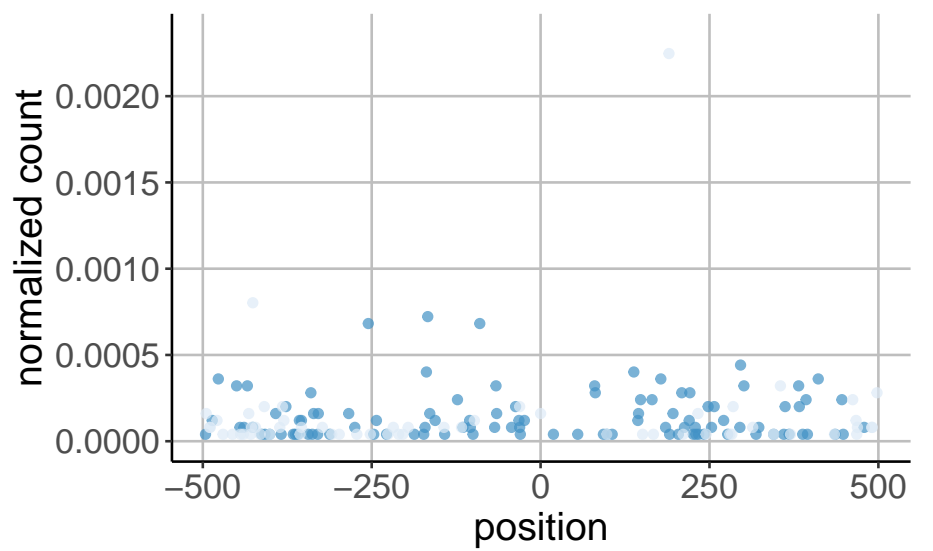

CSTF2-RRGGCGUAGCGUNN

•• antisense — sense    • antisense • sense

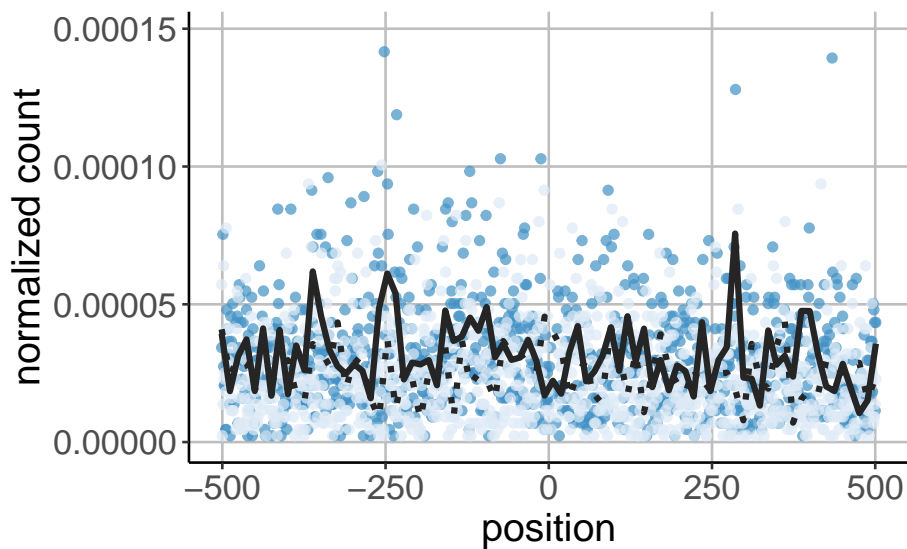

RBM28-GRGGCCGNGCGGUGG

•• antisense — sense    • antisense • sense

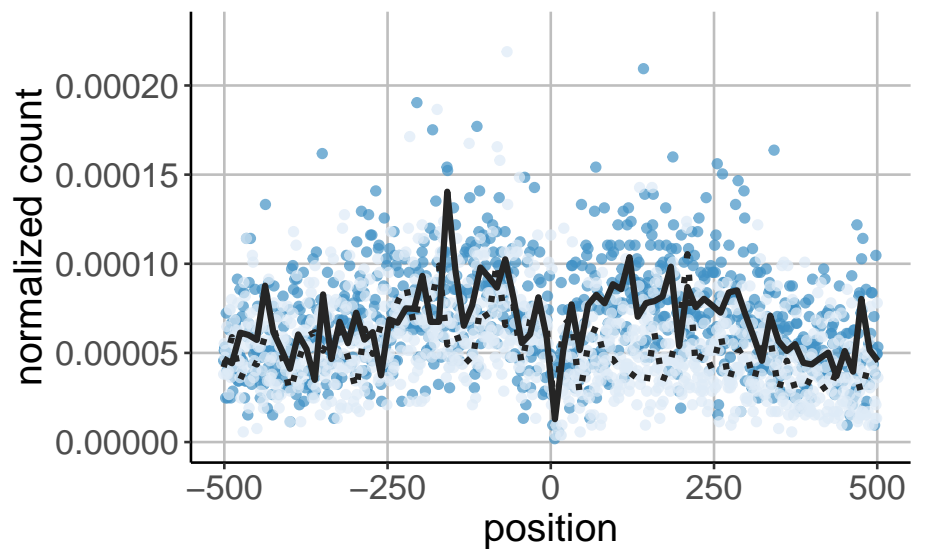

RBM28-GUGGGUCUCGG

•• antisense — sense    • antisense • sense

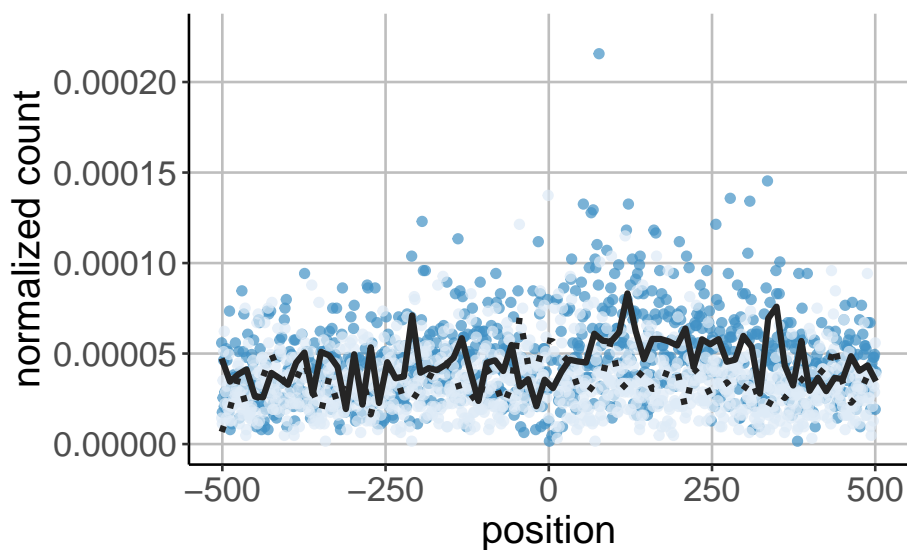

ZC3H10-GCGCAUGCGNN

•• antisense — sense    • antisense • sense

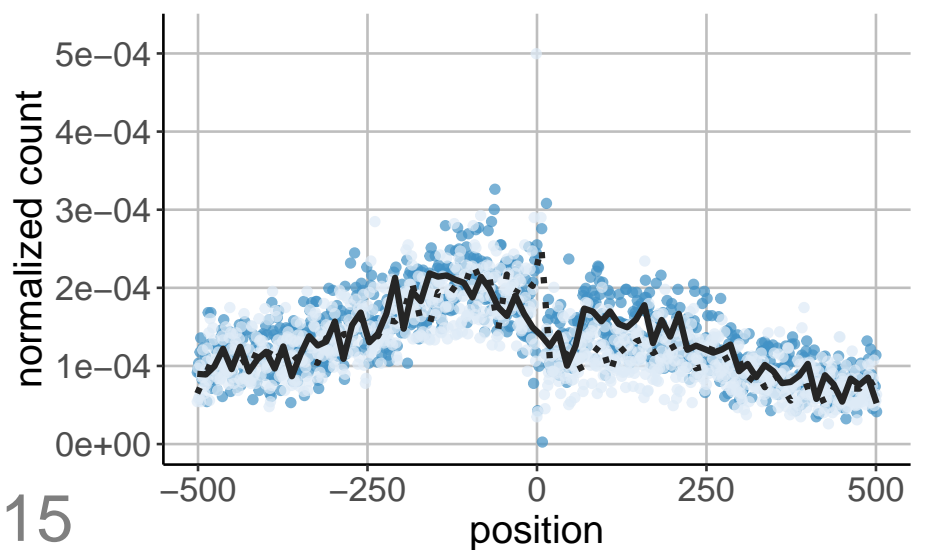



STARTcodon

ZC3H10-NGCGCAGCGUN

• antisense — sense    • antisense • sense

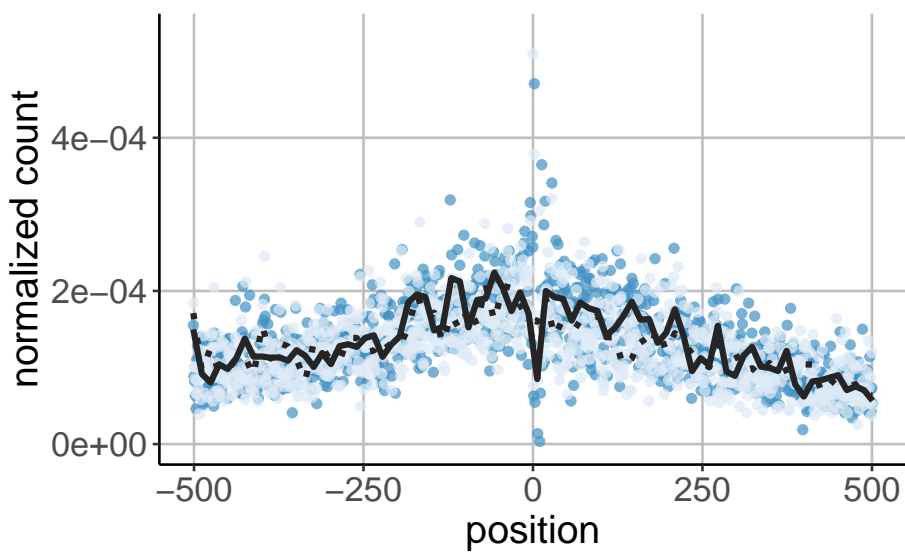

RBFOX1\_2-GCAUGNNGCAUG

• antisense — sense    • antisense • sense

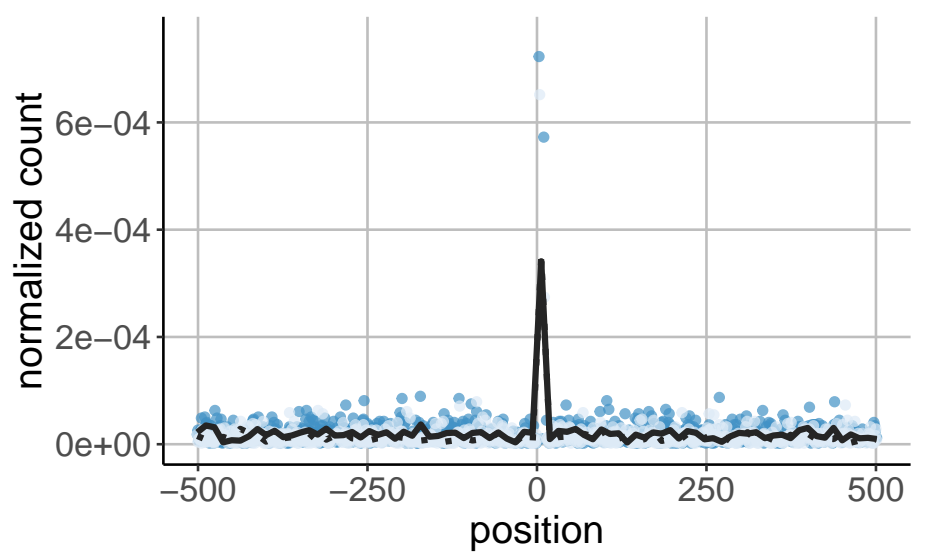

MSI1-KUAGUWKUAGK

• antisense — sense    • antisense • sense

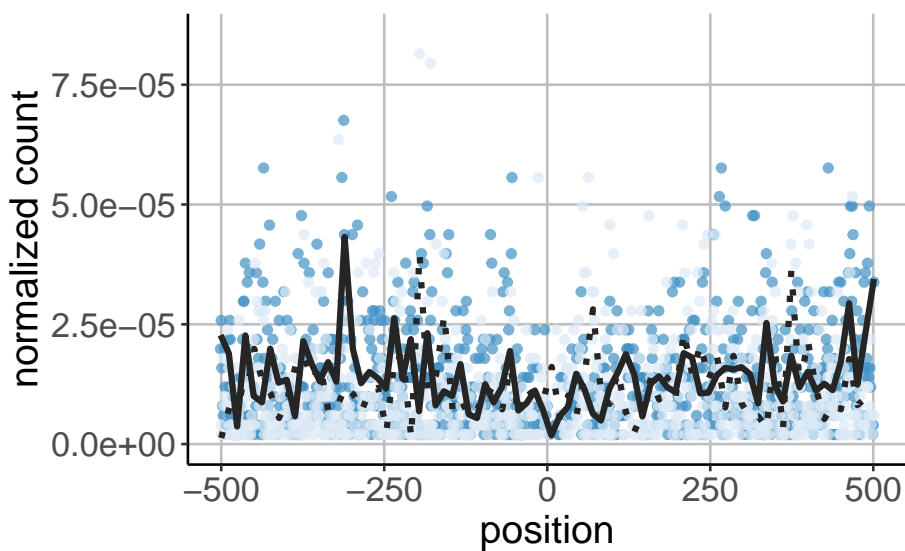

HEXIM1-GKDKCGACGGK

• antisense — sense    • antisense • sense

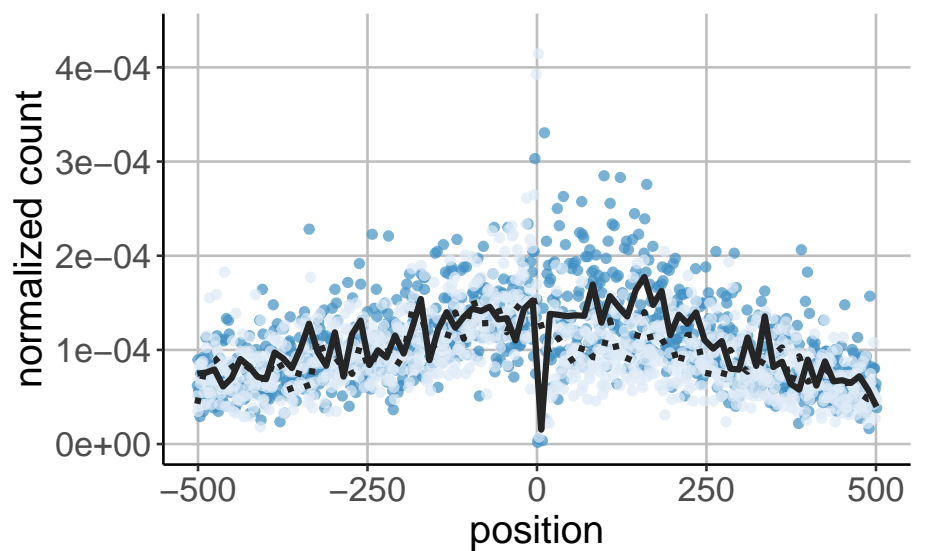

SART3-NGUUAGCRK

• antisense — sense    • antisense • sense

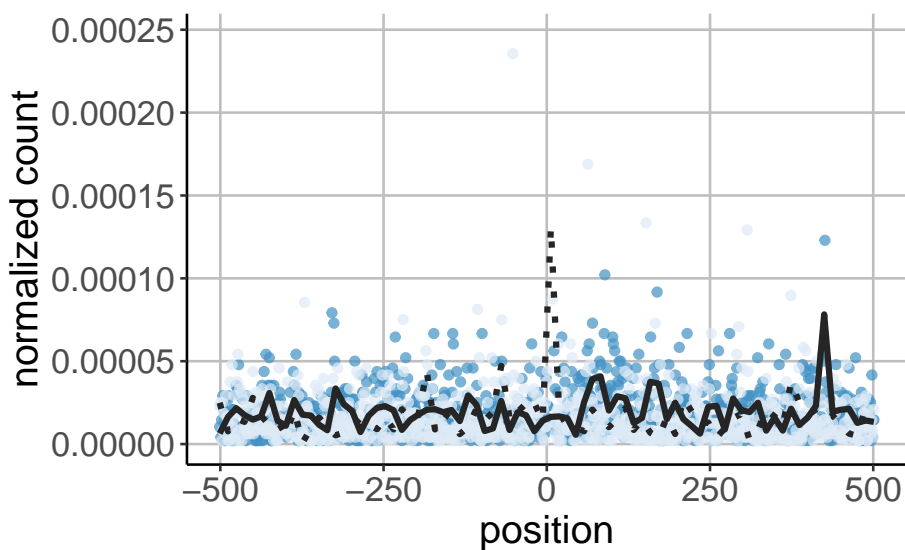

MSI2-GUAGUGDGUAGK

• antisense — sense    • antisense • sense

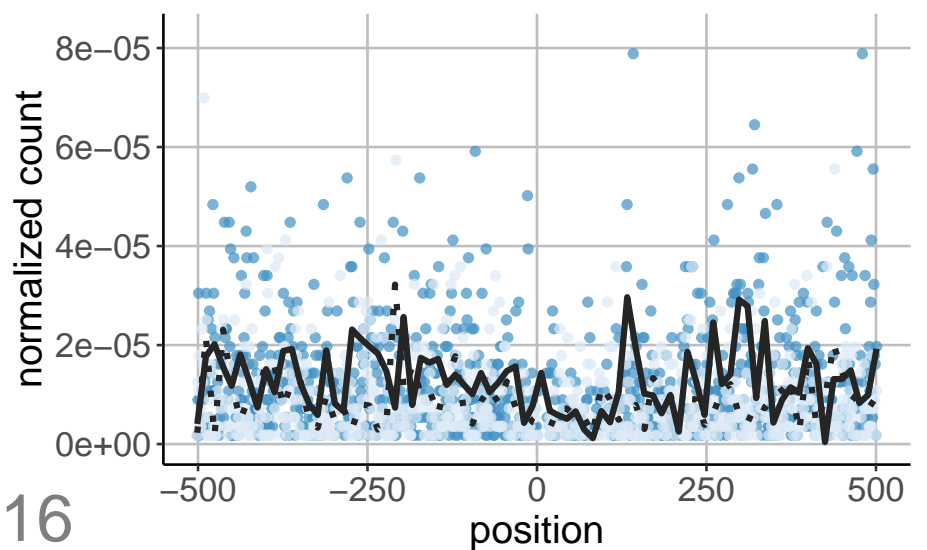

STARTcodon

MSI2-GUAGUNNNGUAGK

•• antisense — sense    • antisense • sense

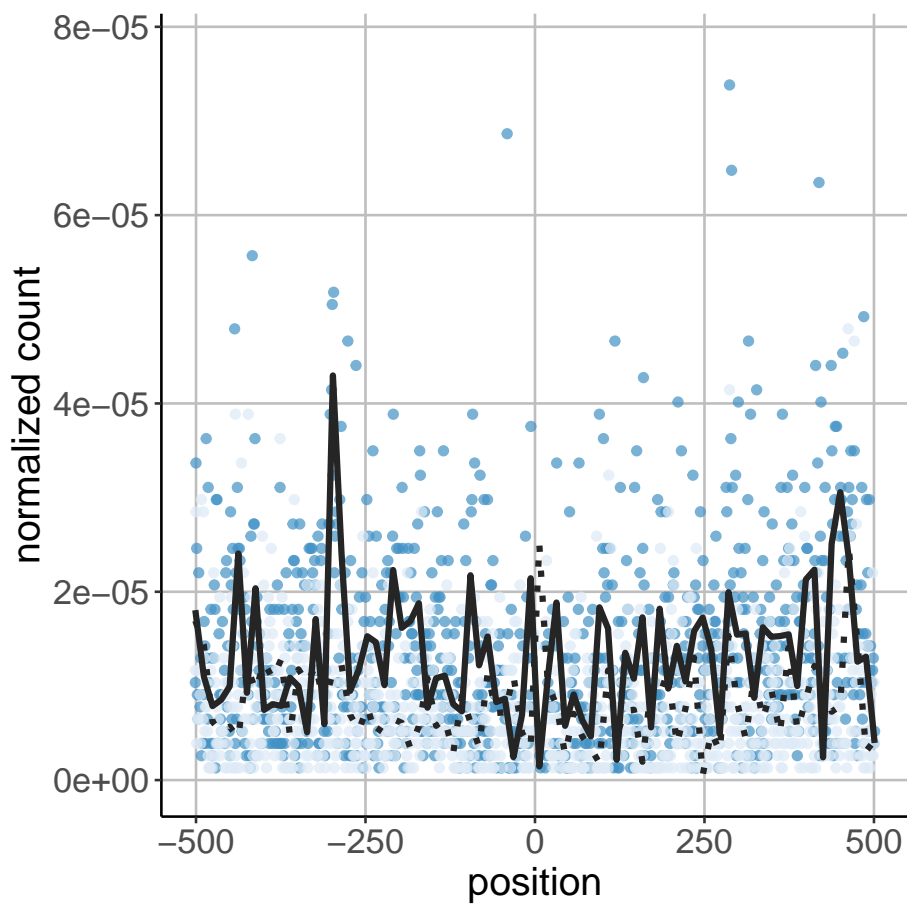

ZCRB1-GNNUUAAKK

•• antisense — sense    • antisense • sense

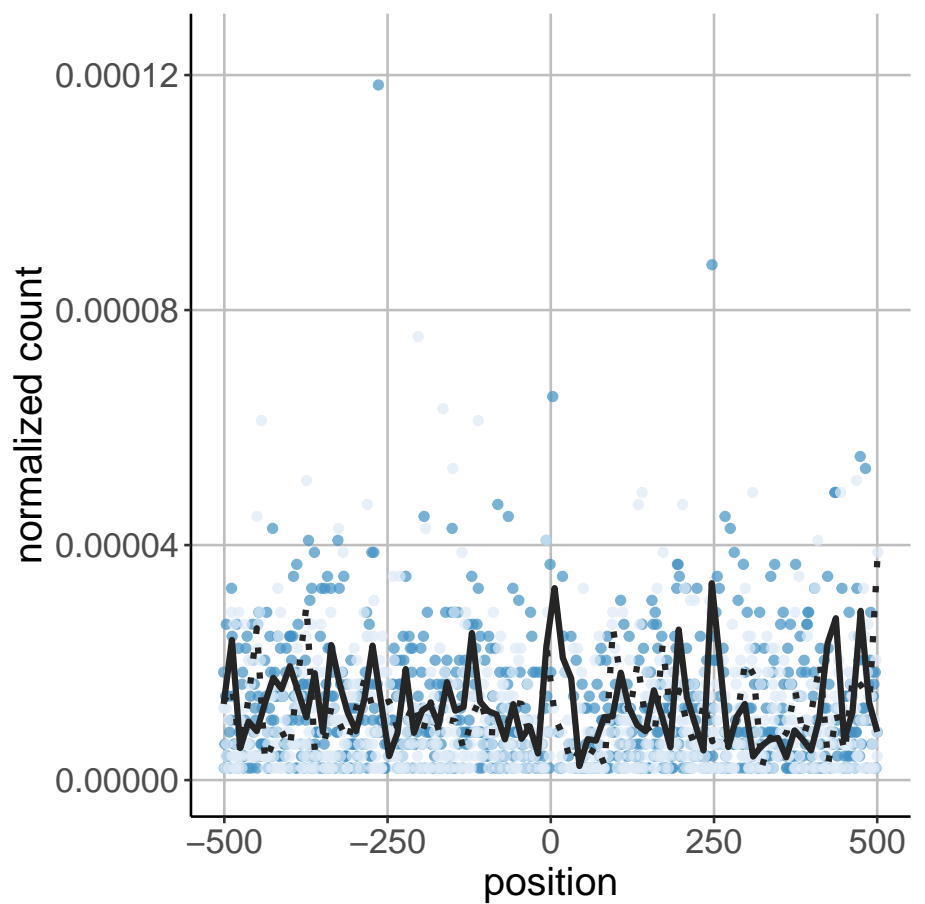

ZCRB1-GUGGACUUA

•• antisense — sense    • antisense • sense

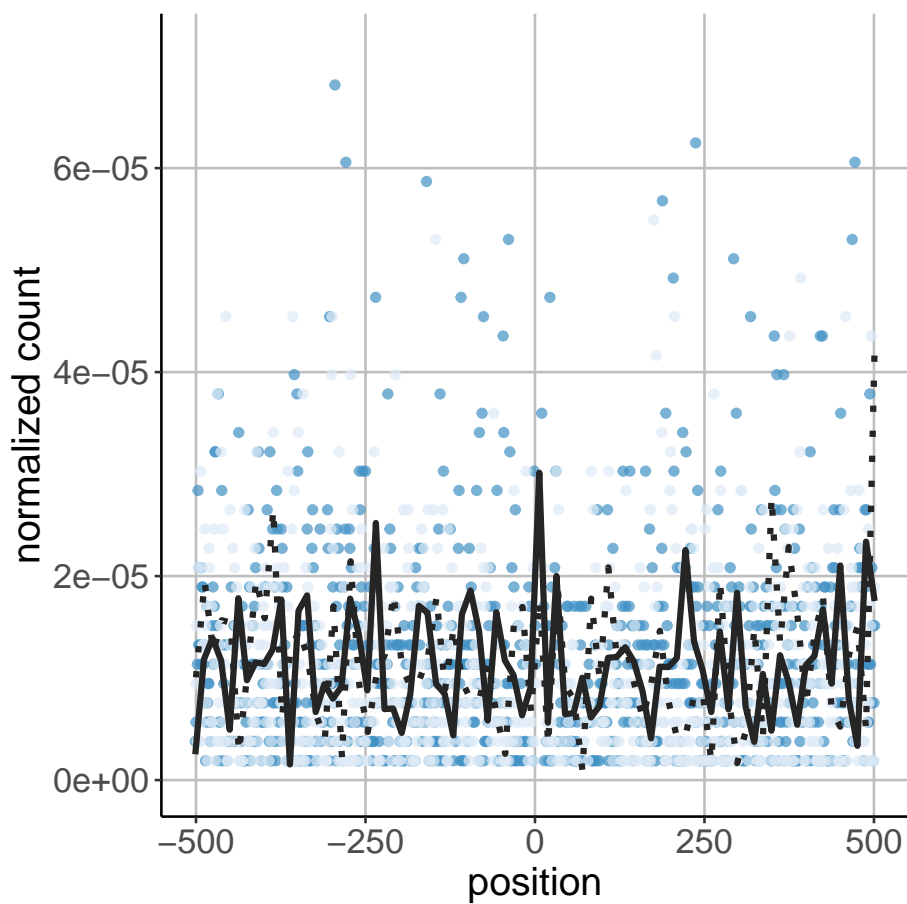

LARP6-GUGUCNNNNNNNNNGAAGUCN

•• antisense — sense    • antisense • sense

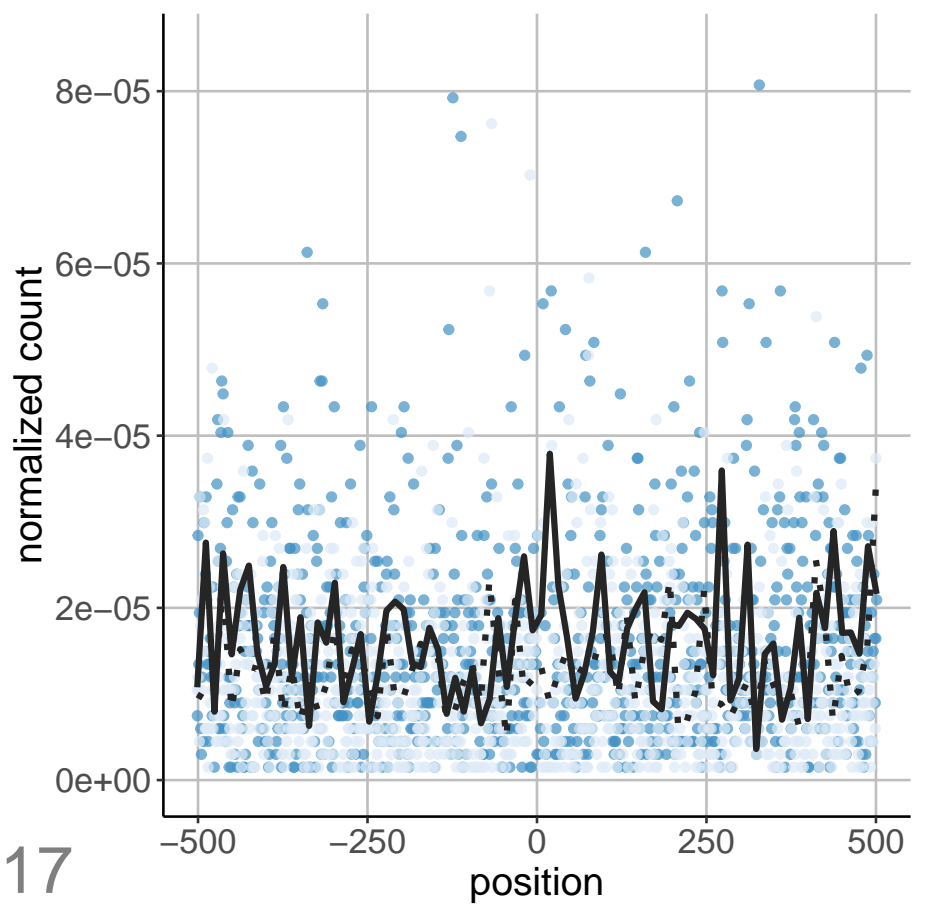

STARTcodon

DAZ1\_2-NNUGUGUGSGUUUCCGSN

•• antisense — sense    • antisense • sense

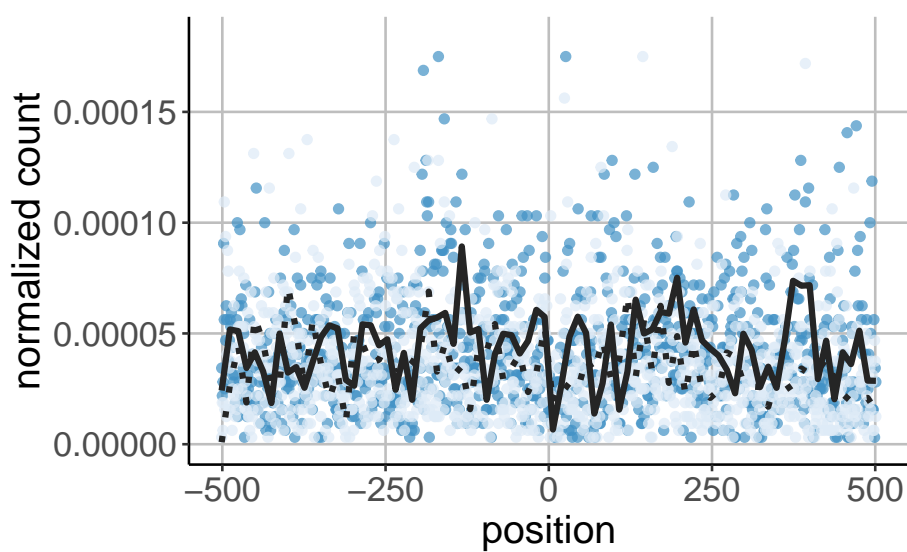

DAZ1\_2-NUGKUGUUGUAGN

•• antisense — sense    • antisense • sense

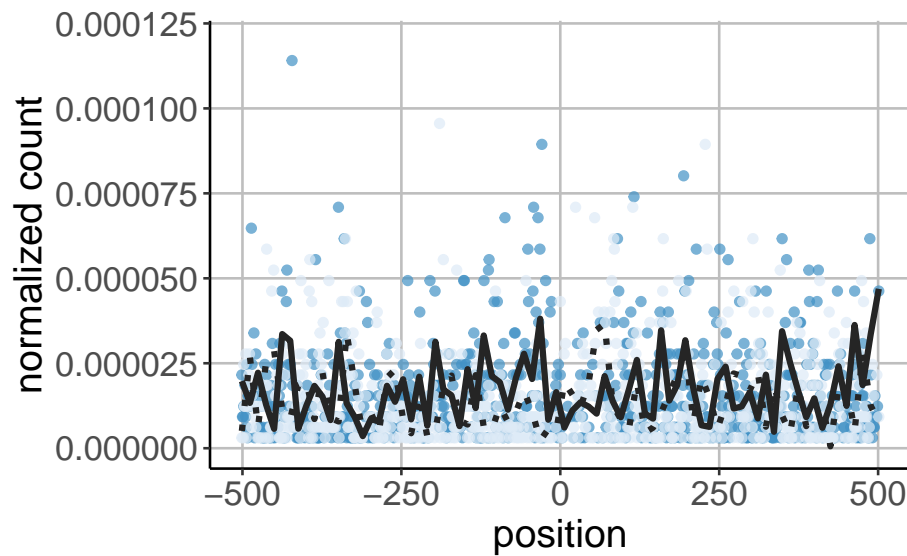

DAZ1\_2-CRNAAUGUUAGUAGN

•• antisense — sense    • antisense • sense

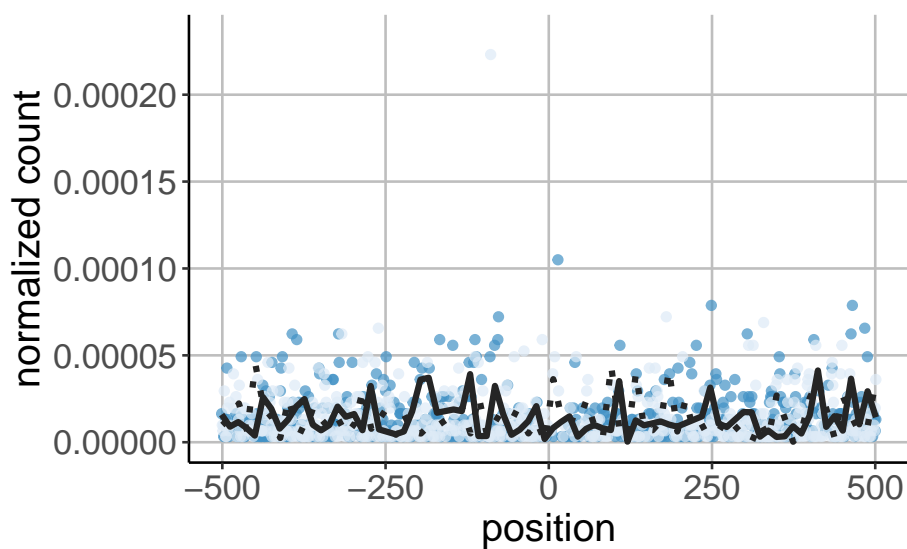

DAZ3-NNUGUGUGSGUUUCCGSN

•• antisense — sense    • antisense • sense

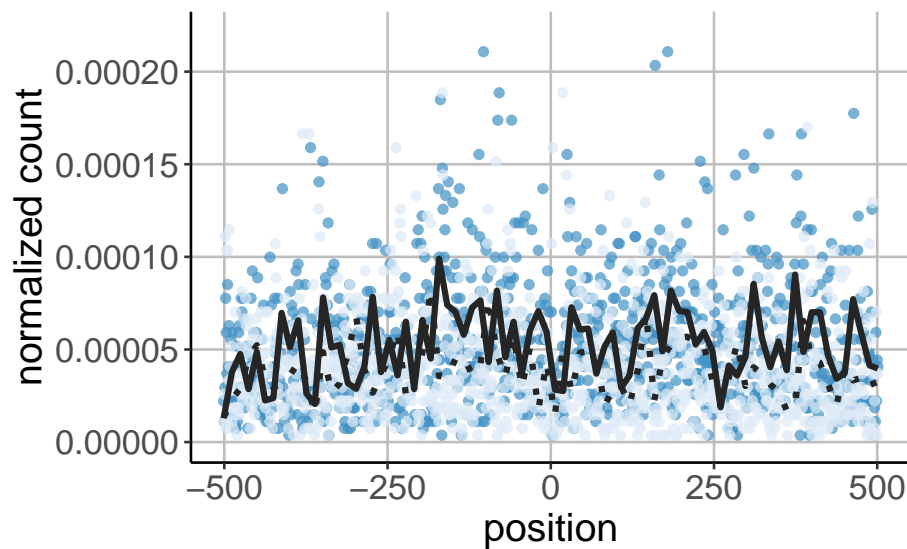

DAZ4-NNUGUGUGSGUUUCCGSN

•• antisense — sense    • antisense • sense

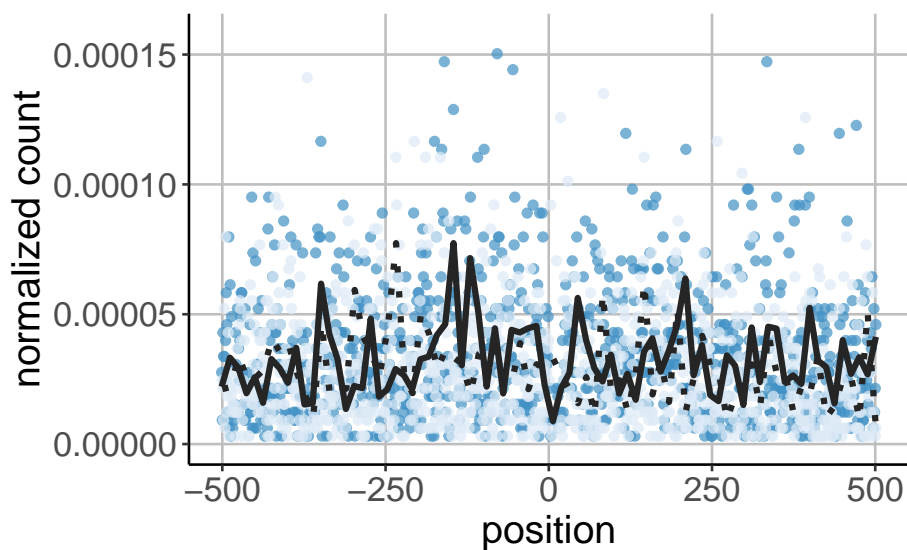

DAZ4-CUGKUGUUGUAGG

•• antisense — sense    • antisense • sense

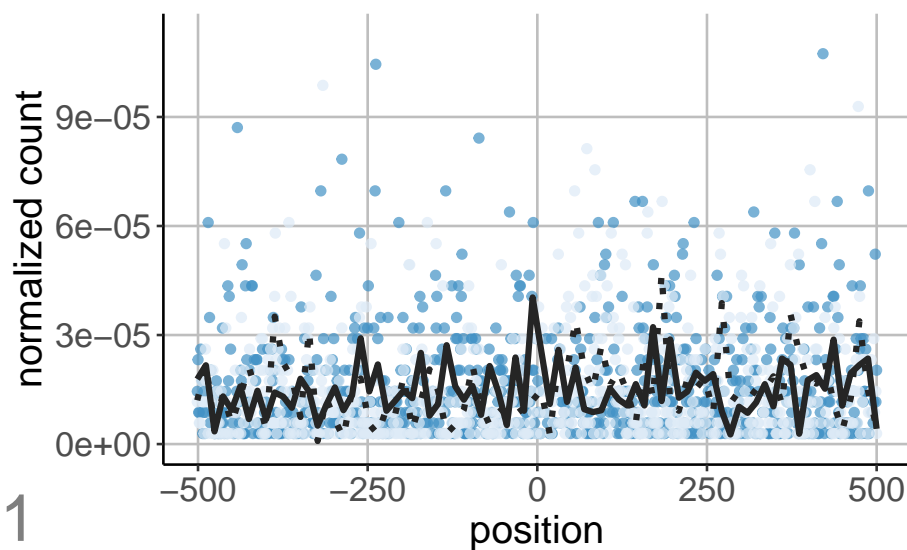

STARTcodon

DAZL-NNUGYGUGCGUUUCCGSN

•• antisense — sense    • antisense • sense

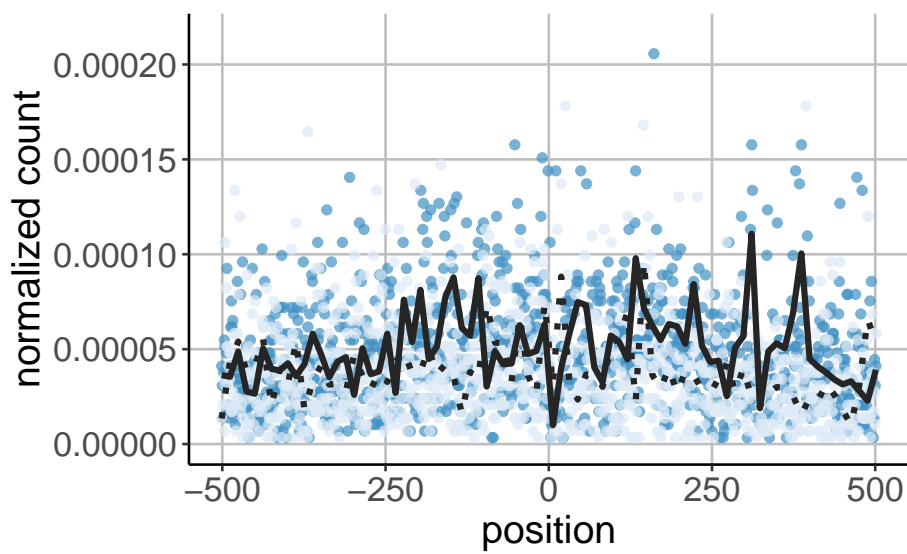

HNRNPA1-NGCAGUUUUAGGGCN

•• antisense — sense    • antisense • sense

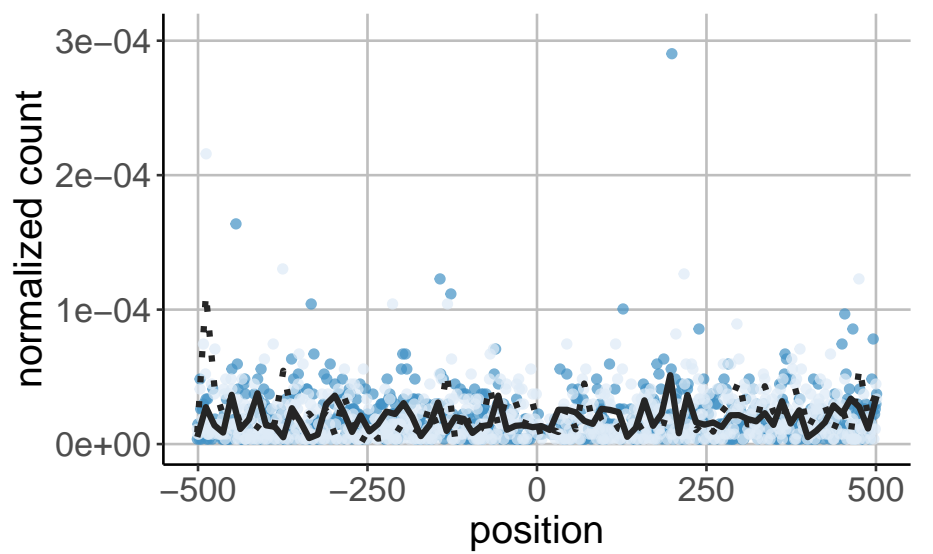

HNRNPC-NGGGUCUNAUUUUUUAAN

•• antisense — sense    • antisense • sense

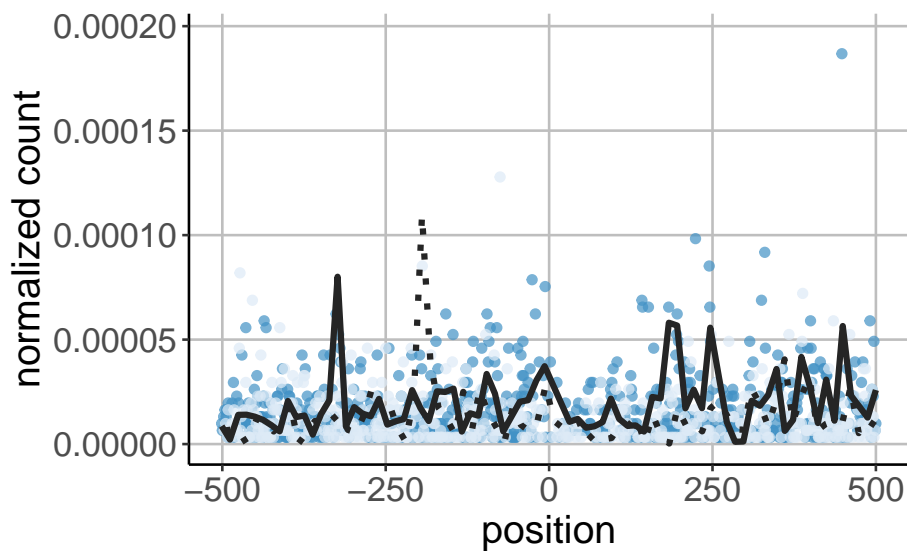

HNRNPCL1-NGGGUCUNAUUUUUUAAN

•• antisense — sense    • antisense • sense

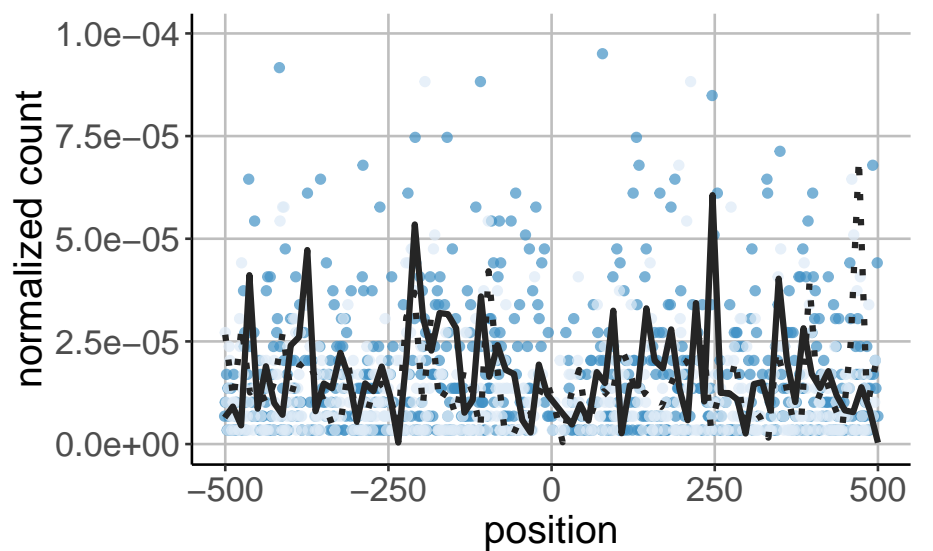

MKRN1-NYGUAAAKUGUAGN

•• antisense — sense    • antisense • sense

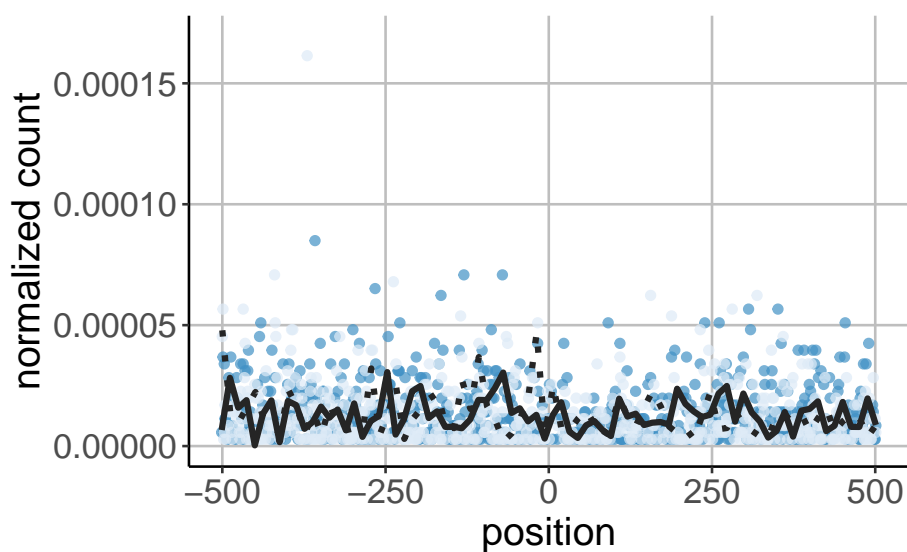

RALY-GGGUCUWUUUUUAA

•• antisense — sense    • antisense • sense

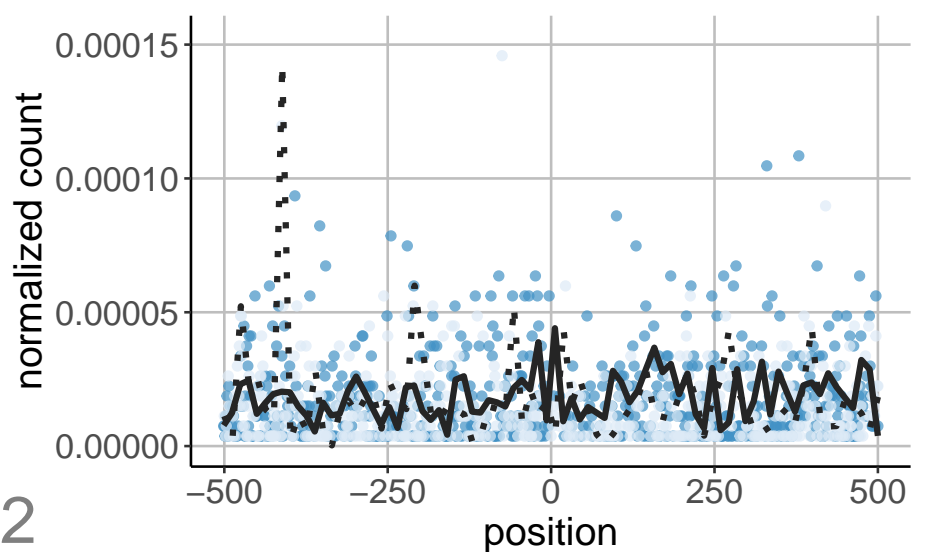

STARTcodon

RBFOX1\_4-GKUGCAUGUG

•• antisense — sense    • antisense • sense

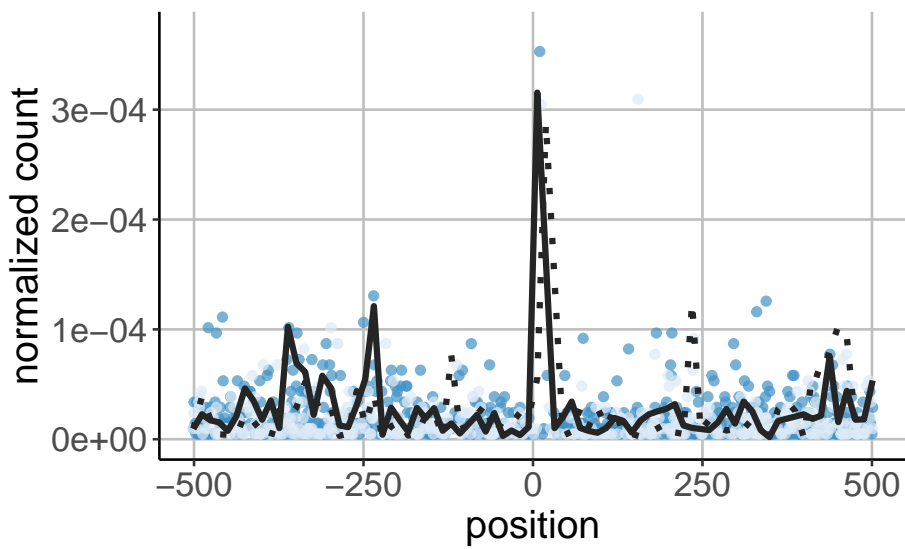

RBFOX3-GUWGCAUGUG

•• antisense — sense    • antisense • sense

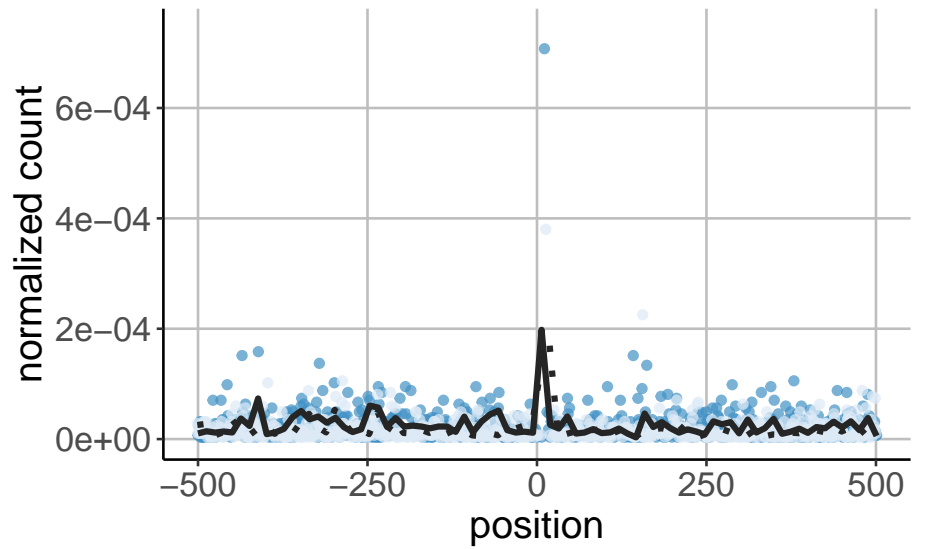

RBM4-KGUUGC GCGGG

•• antisense — sense    • antisense • sense

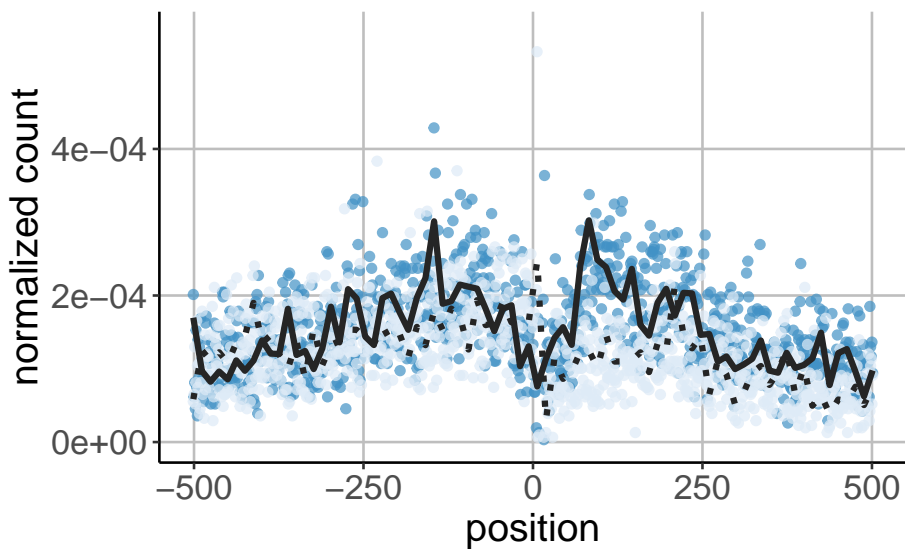

RBM4-UGAGUGC GGUAG

•• antisense — sense    • antisense • sense

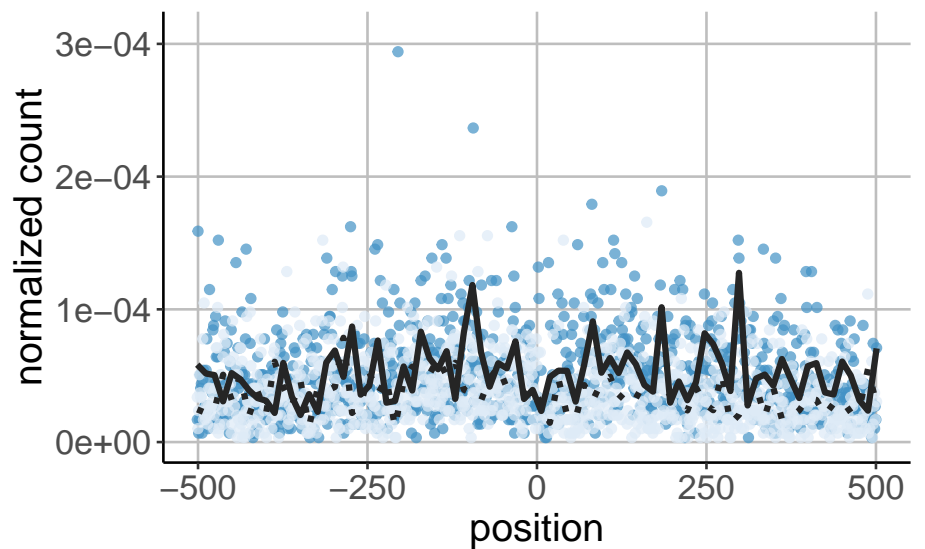

RBM4B-KGUUGC GCGGG

•• antisense — sense    • antisense • sense

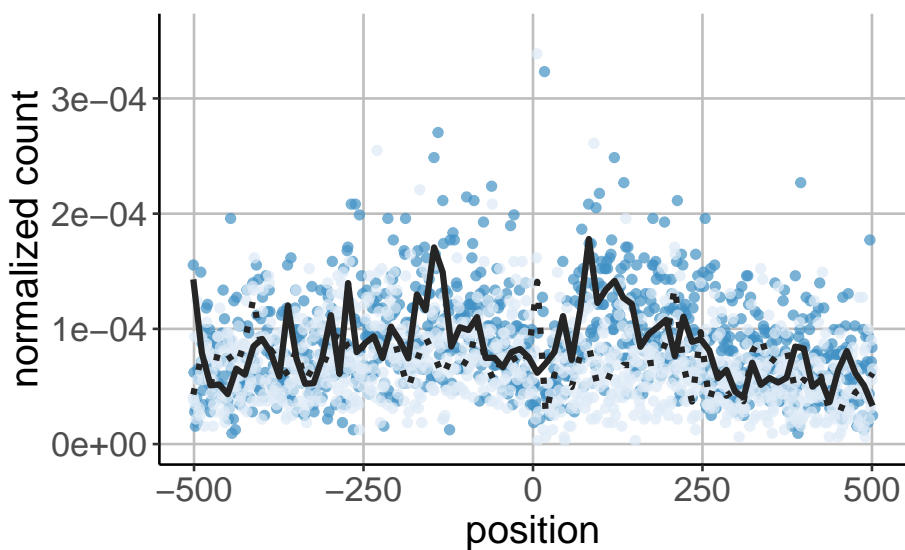

RBM4B-UGAGUGC GGUAG

•• antisense — sense    • antisense • sense

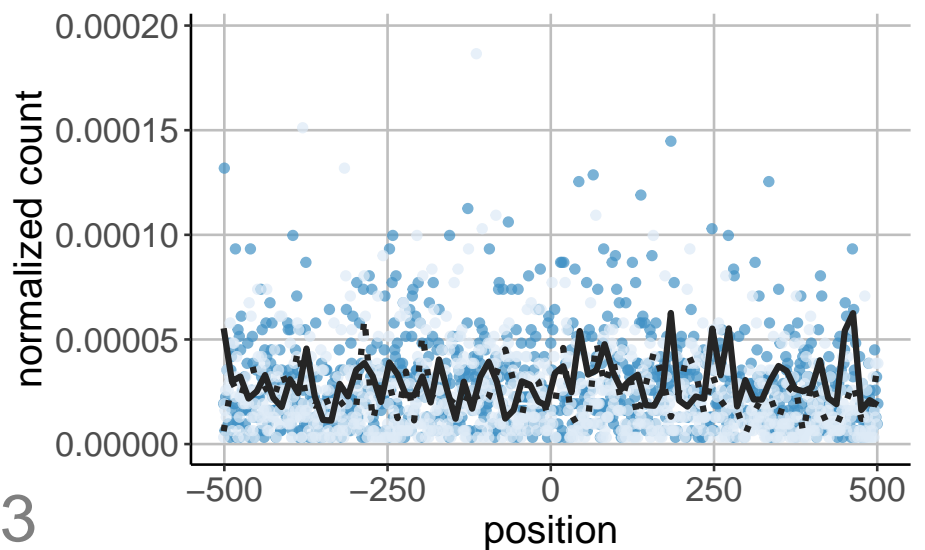

3

STARTcodon

RBM6-YRCGCUCCUNGCY

• antisense — sense    • antisense • sense

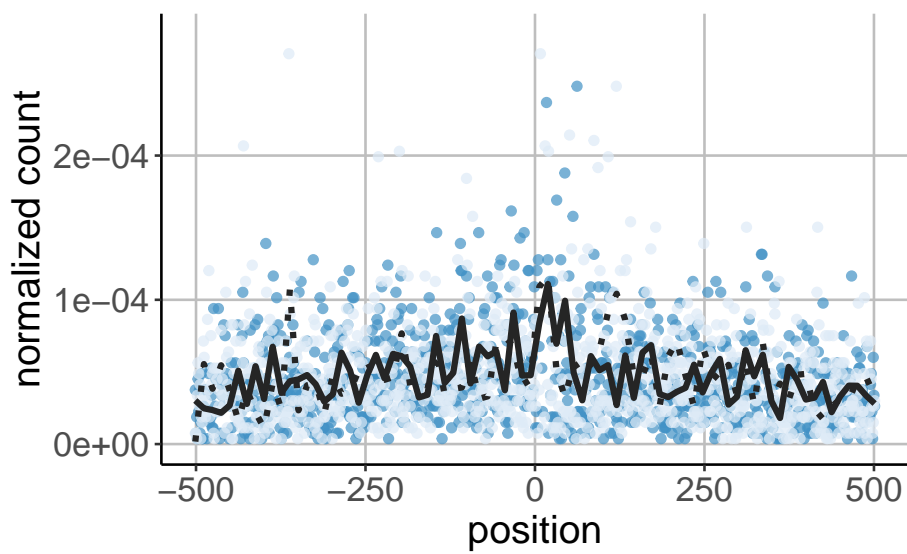

RBM6-YRYGCUCGUGCYN

• antisense — sense    • antisense • sense

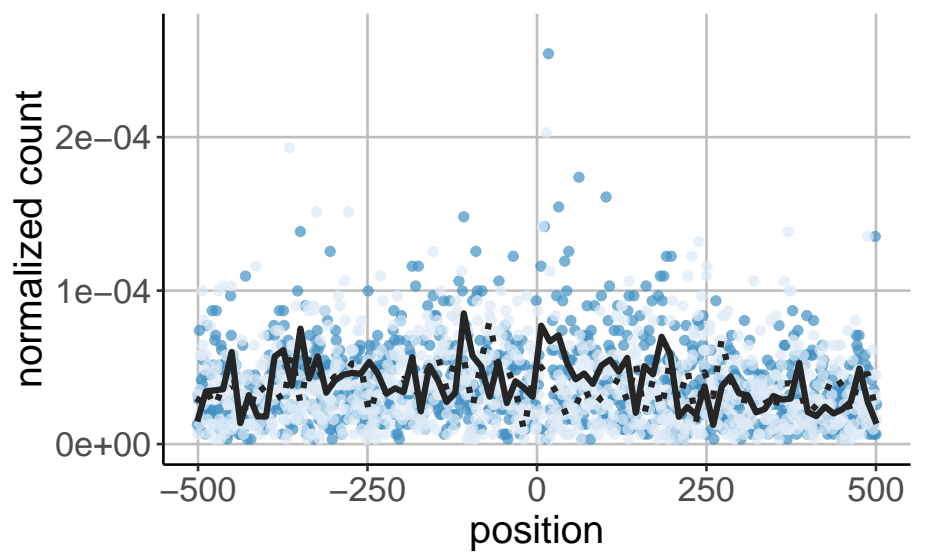

RBMS1-SGUGCAUAAKGCN

• antisense — sense    • antisense • sense

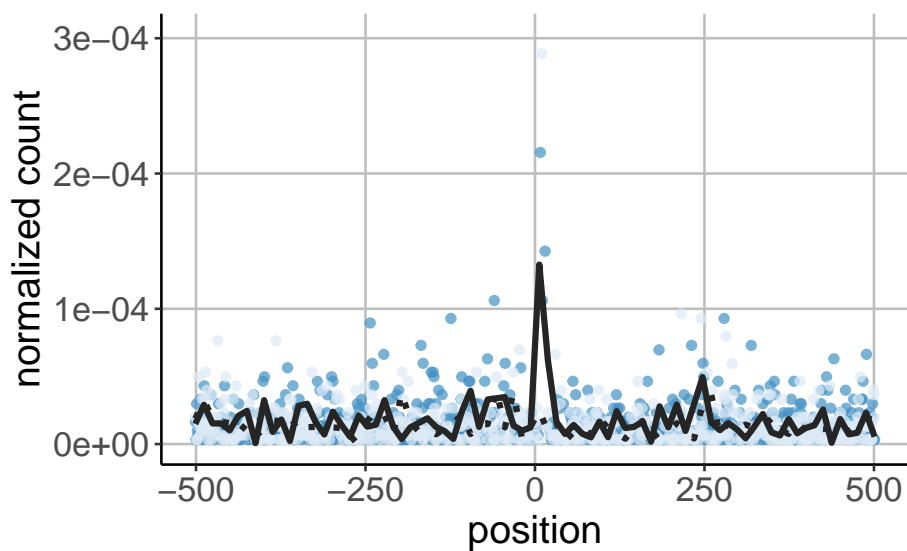

RBMS2-NUGCAUAAUGN

• antisense — sense    • antisense • sense

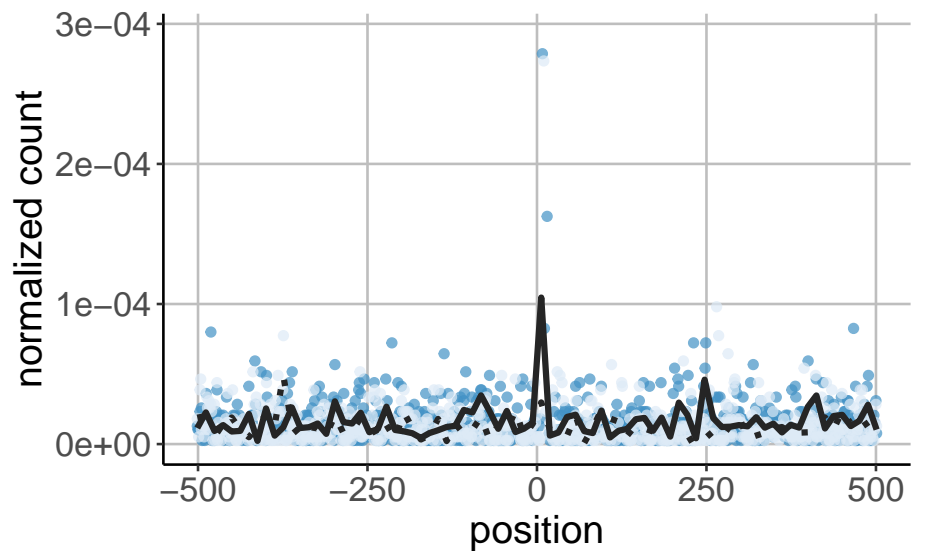

RBMS3-NUGCAUAAUGN

• antisense — sense    • antisense • sense

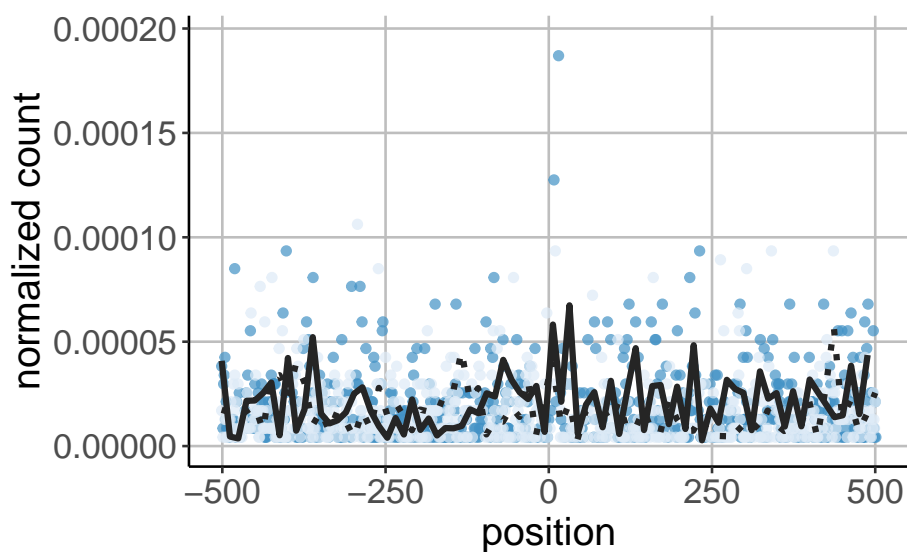

RBMS3-SAUGYAURAKKUG

• antisense — sense    • antisense • sense

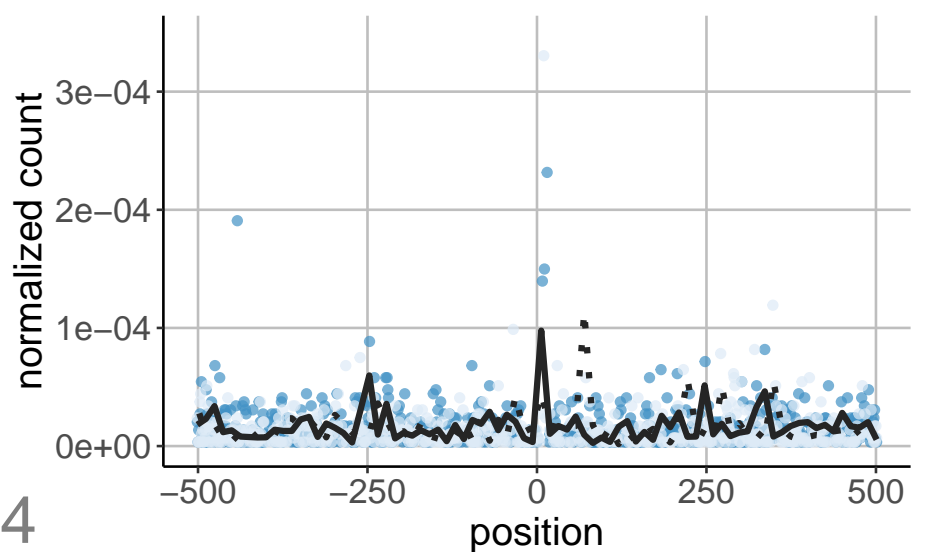

4

STARTcodon

RBM1E-NGCUUCGNGCN

• antisense — sense    • antisense • sense

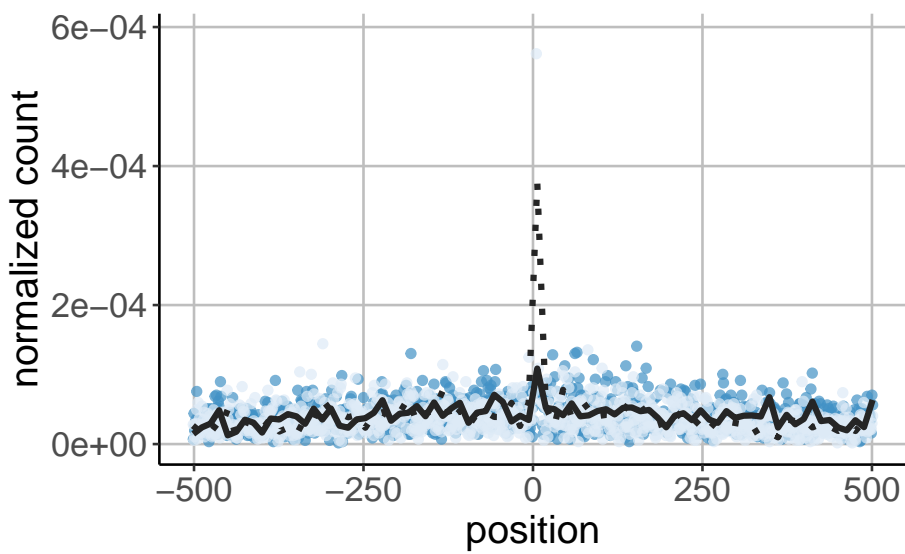

RBM1E-NAGCUUNGUGCUN

• antisense — sense    • antisense • sense

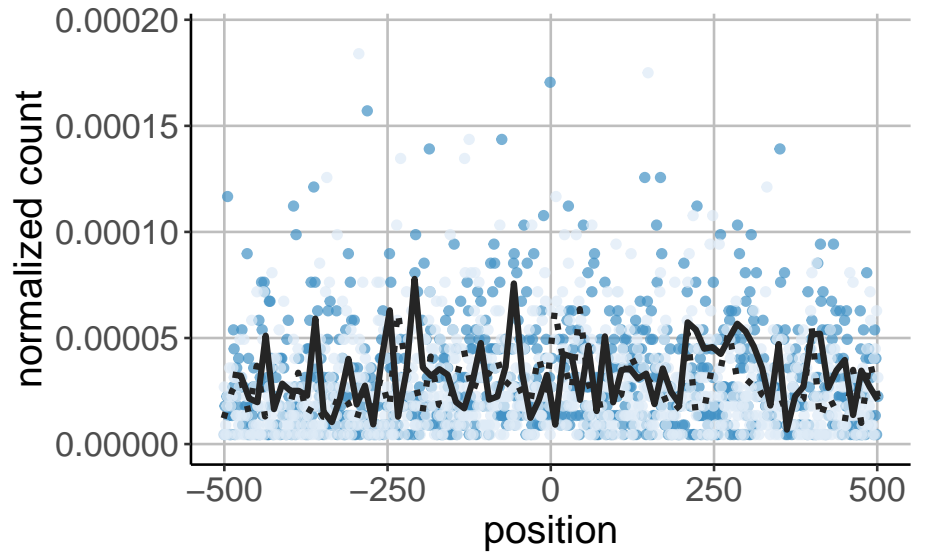

RBM1F-NGCCUCAAGGYN

• antisense — sense    • antisense • sense

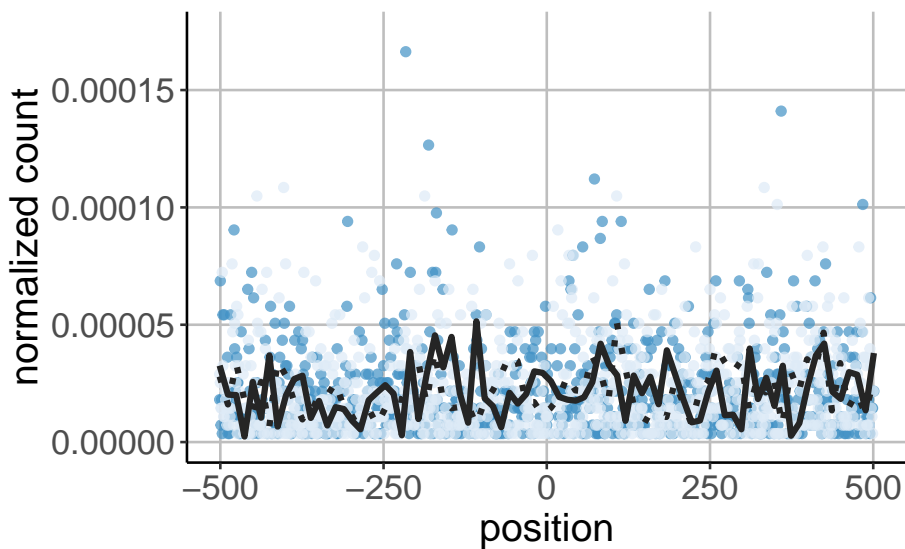

RBM1F-GCGCAAGAGC

• antisense — sense    • antisense • sense

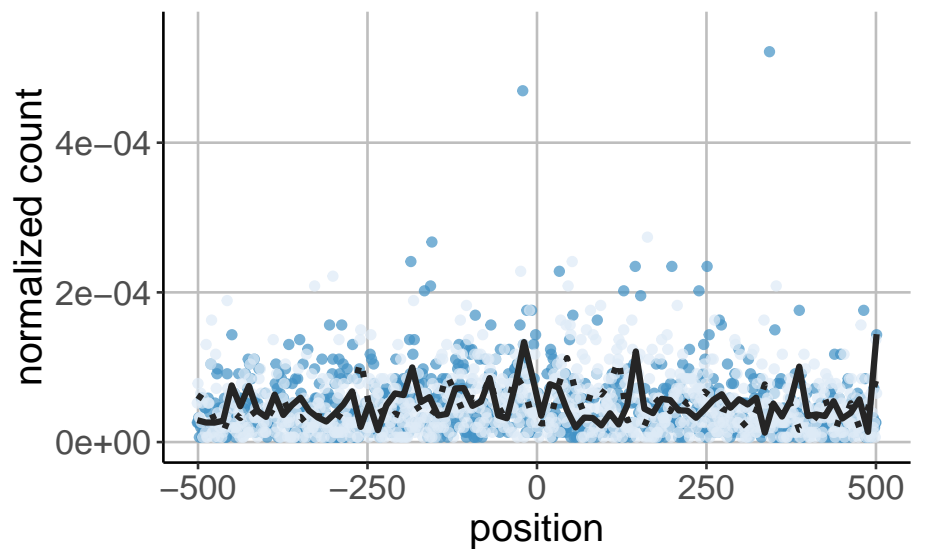

RBM1J-NGCCUCAAGGYN

• antisense — sense    • antisense • sense

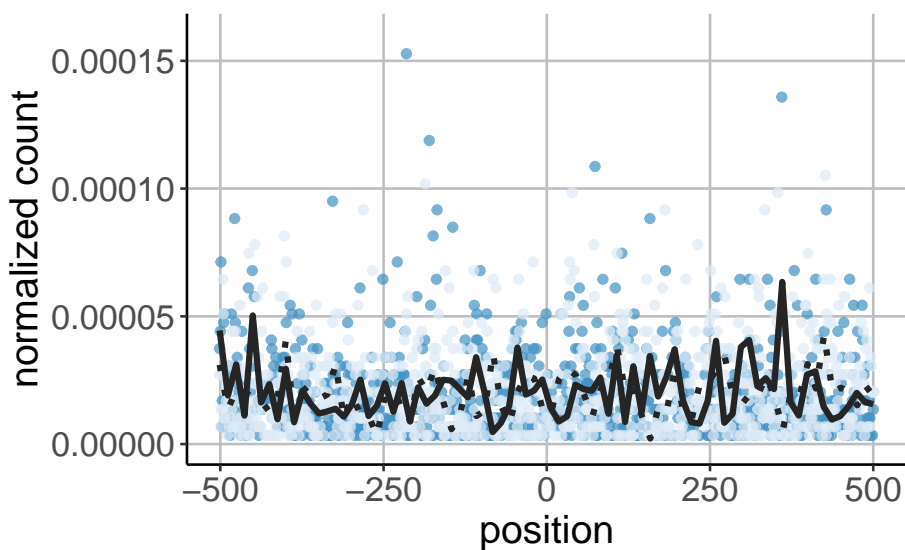

RBM1J-GCGCAAGAGC

• antisense — sense    • antisense • sense

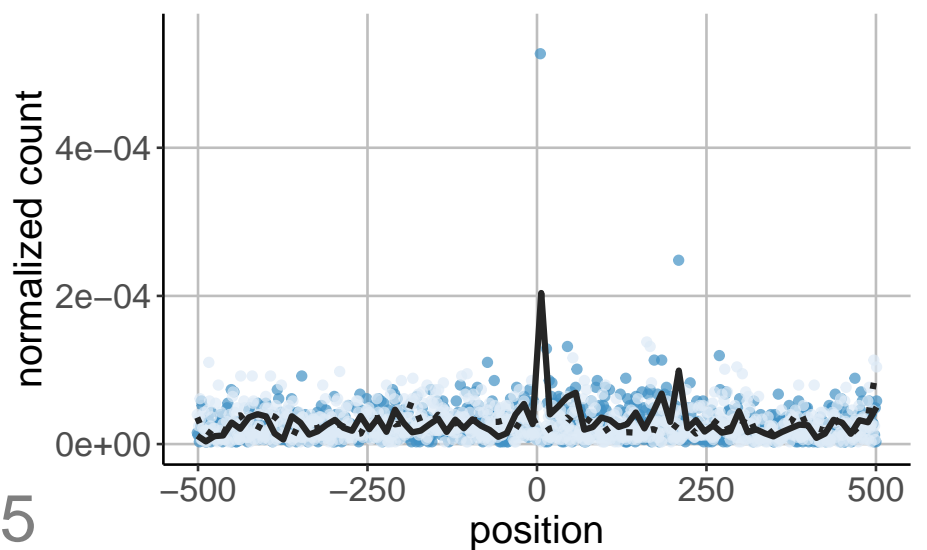

5

STARTcodon

RBM1J-NGCGUCGUGGCN

•• antisense — sense    • antisense • sense

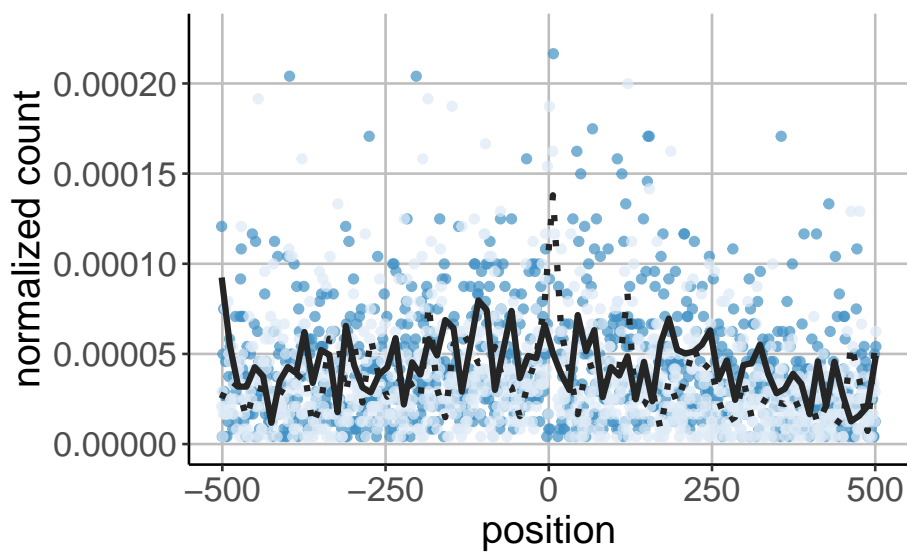

RBM1J-UGAAUUCGUCN

•• antisense — sense    • antisense • sense

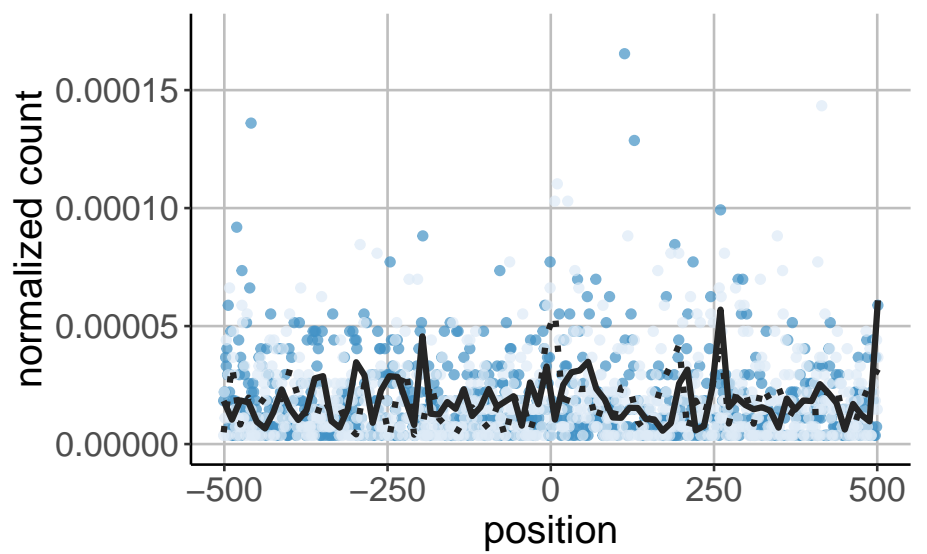

RC3H1\_2-YRCGUUUUAGKR

•• antisense — sense    • antisense • sense

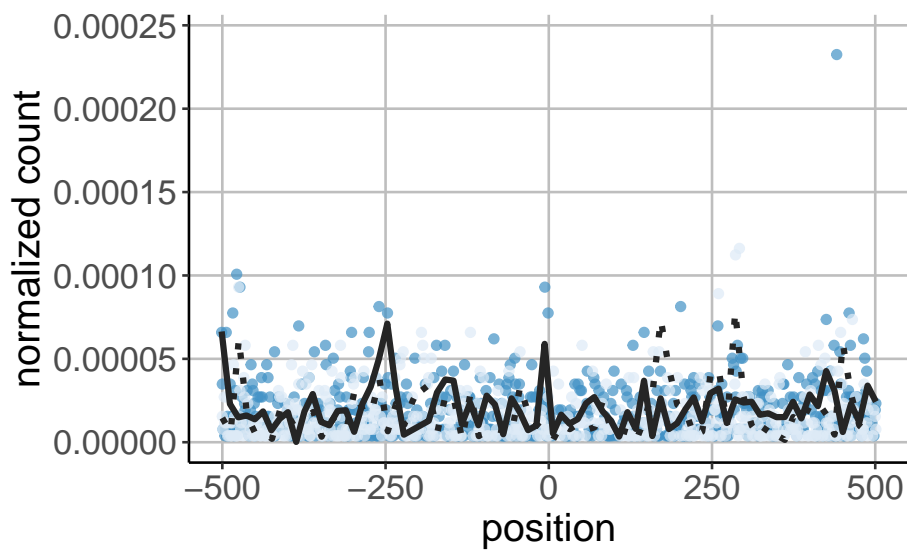

RC3H2-CURCGUUUUAGKAG

•• antisense — sense    • antisense • sense

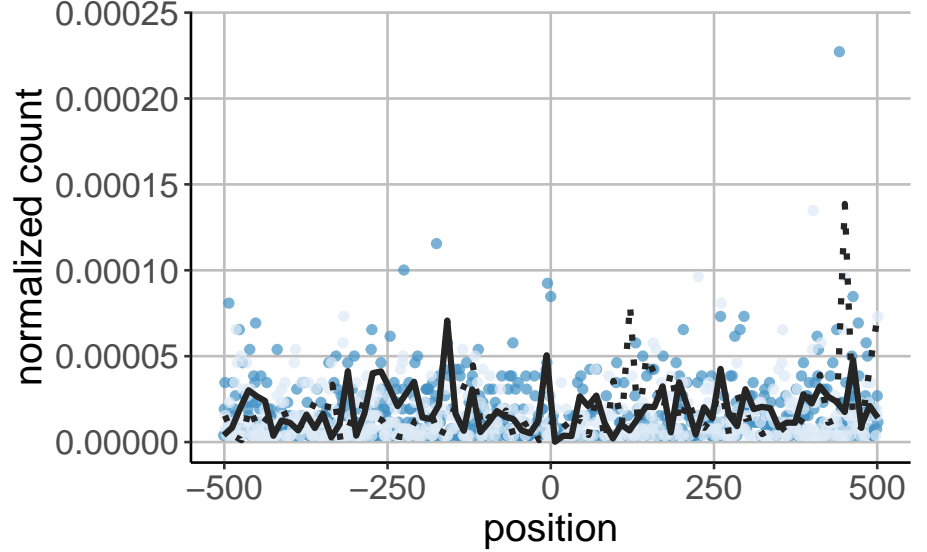

RC3H2-CUCGUAUCGAG

•• antisense — sense    • antisense • sense

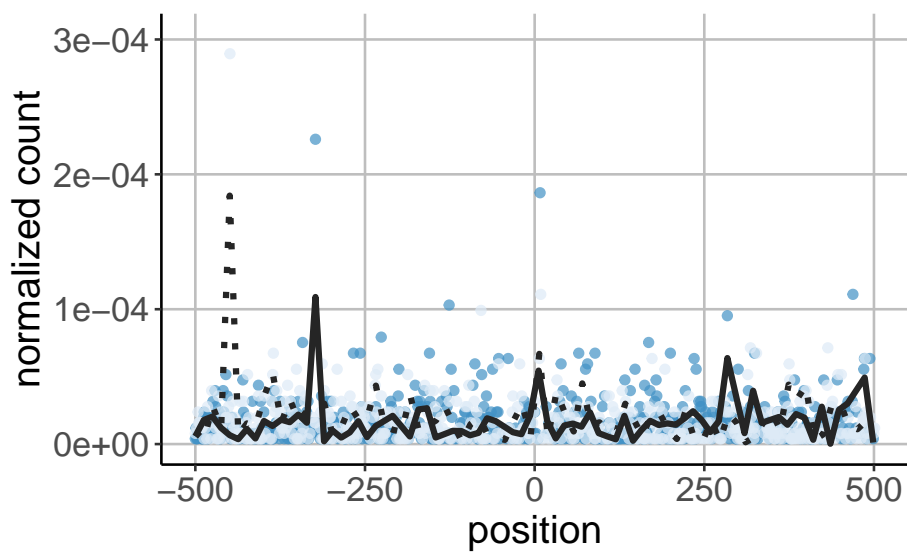

RC3H2-CCUCUNUGAGG

•• antisense — sense    • antisense • sense

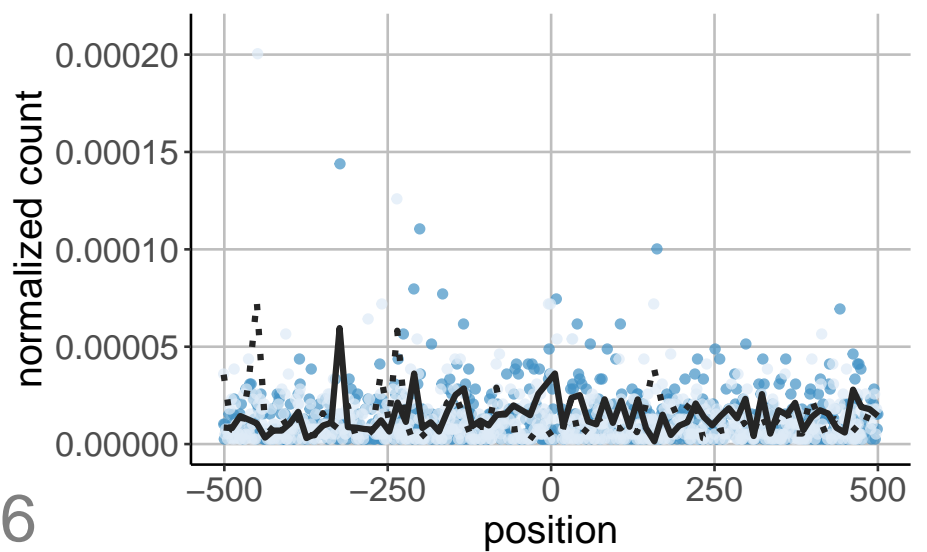

6



STARTcodon

RNPC3-GCAGUKUUAGGGY

•• antisense — sense    • antisense • sense

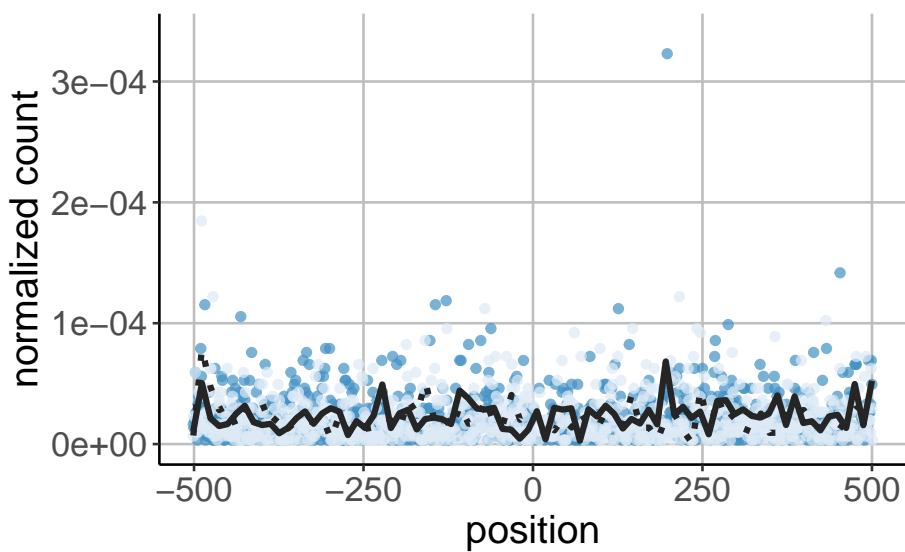

YBX1-RCCAYRHCAUCGY

•• antisense — sense    • antisense • sense

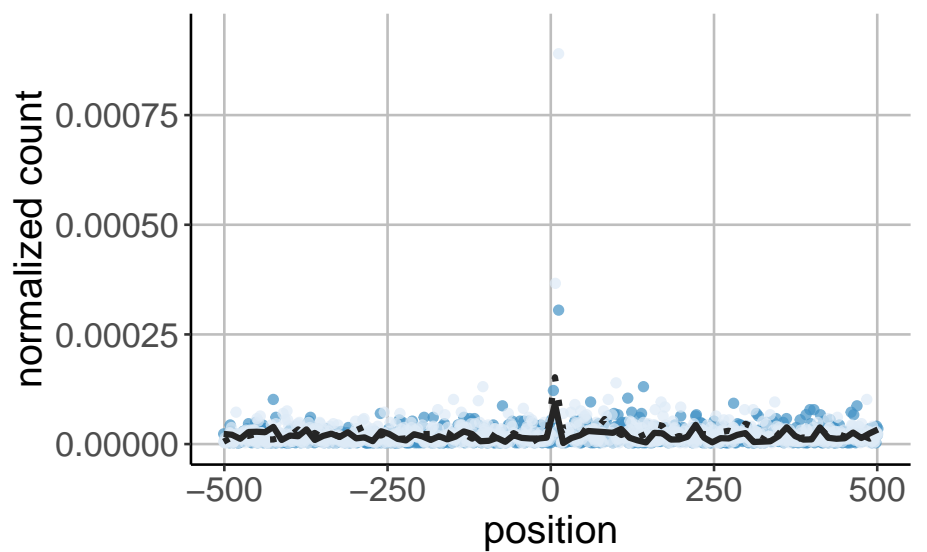

ZC3H12A-NGCAGGUAAGUGCN

•• antisense — sense    • antisense • sense

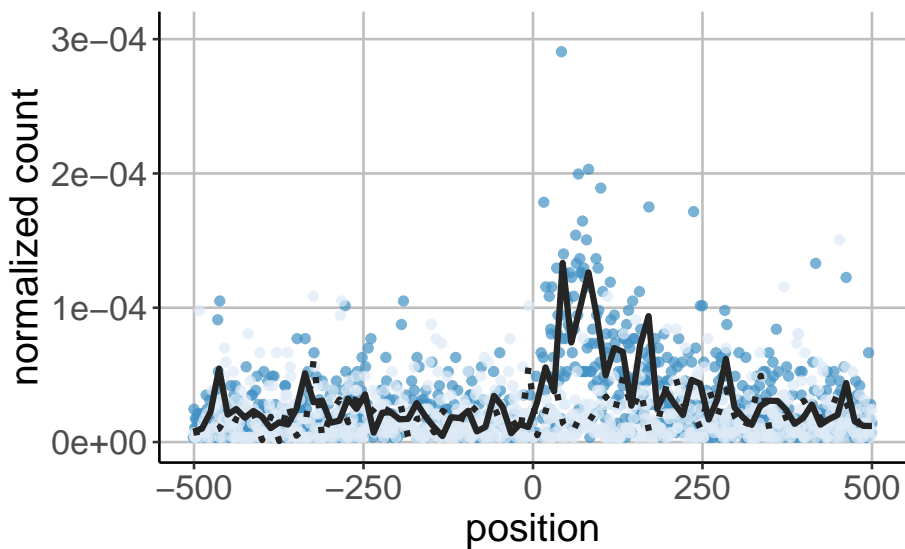

ZC3H12B-NGCAGGUAAGUGSN

•• antisense — sense    • antisense • sense

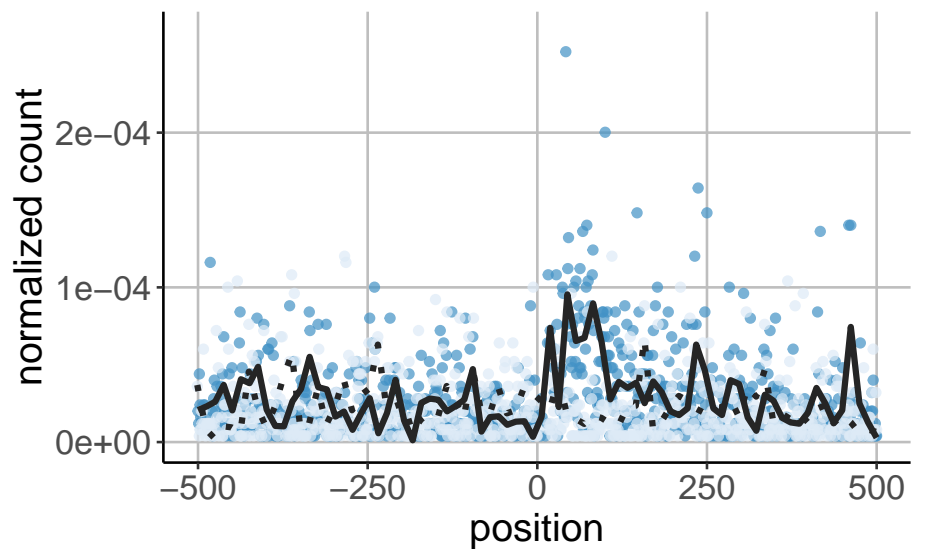

ZC3H12B-SCAGGUAUUAUGS

•• antisense — sense    • antisense • sense

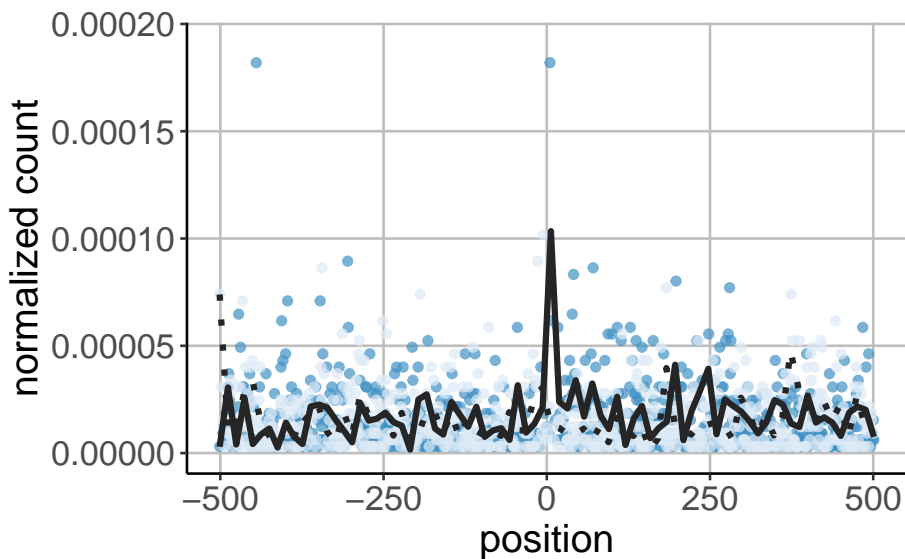

STOPcodon

ZC3H8-GCUUGC

•• antisense — sense    • antisense • sense

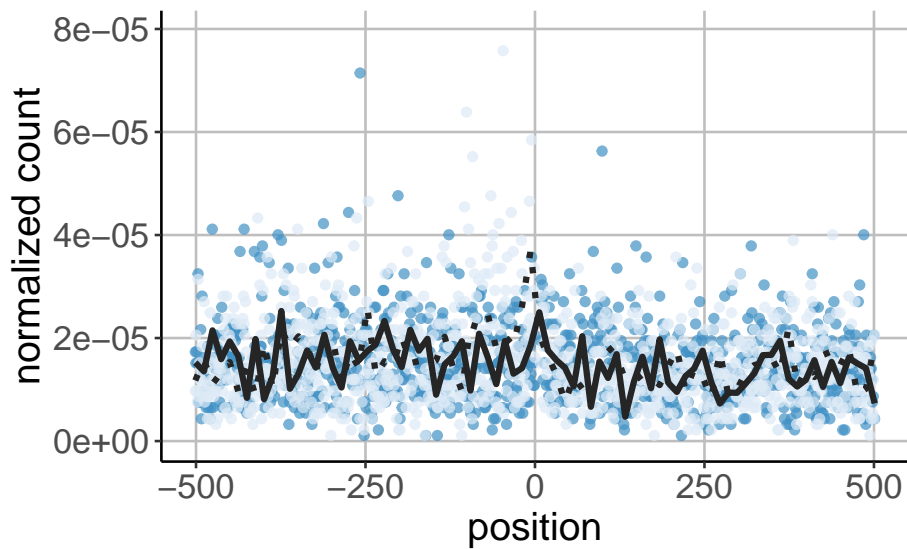

ESRP1\_3-GGUGUUGGUG

•• antisense — sense    • antisense • sense

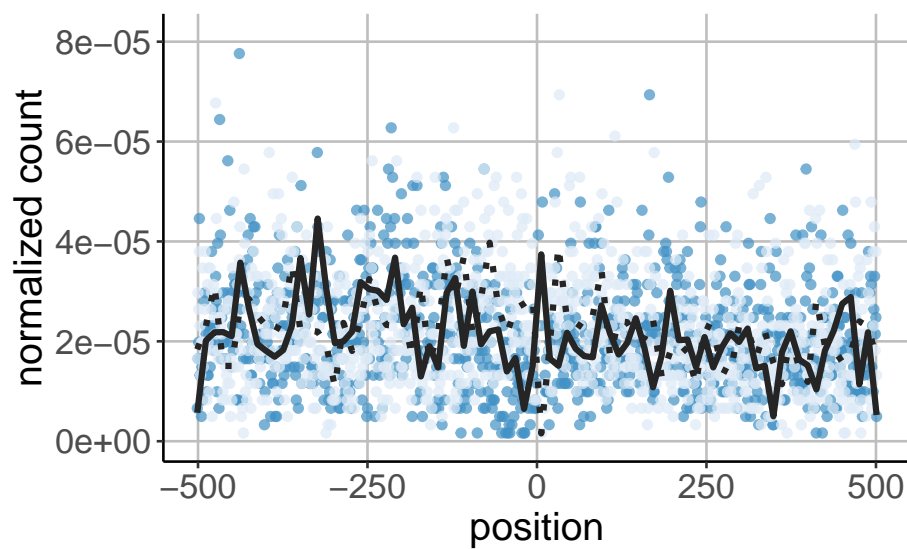

ELAVL3-GUUUUUG

•• antisense — sense    • antisense • sense

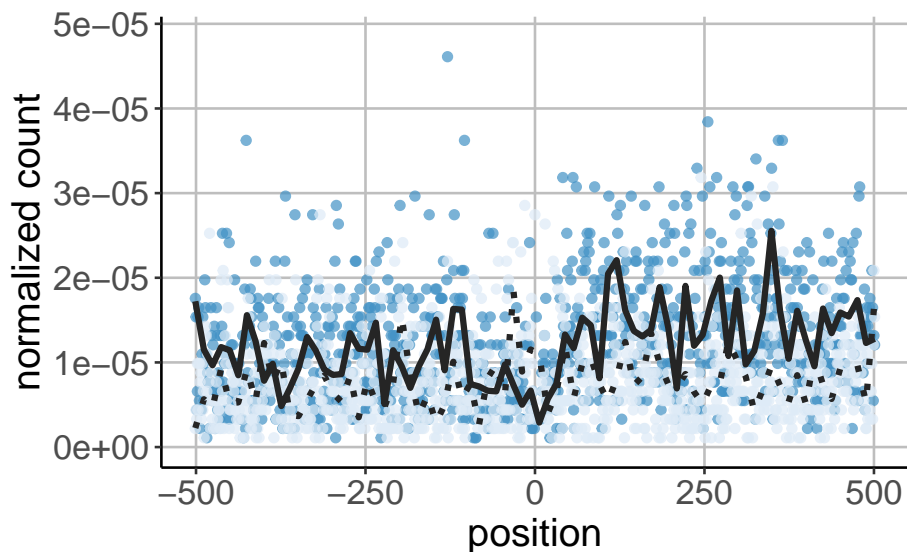

PUM1-NUGUAAAUAG

•• antisense — sense    • antisense • sense

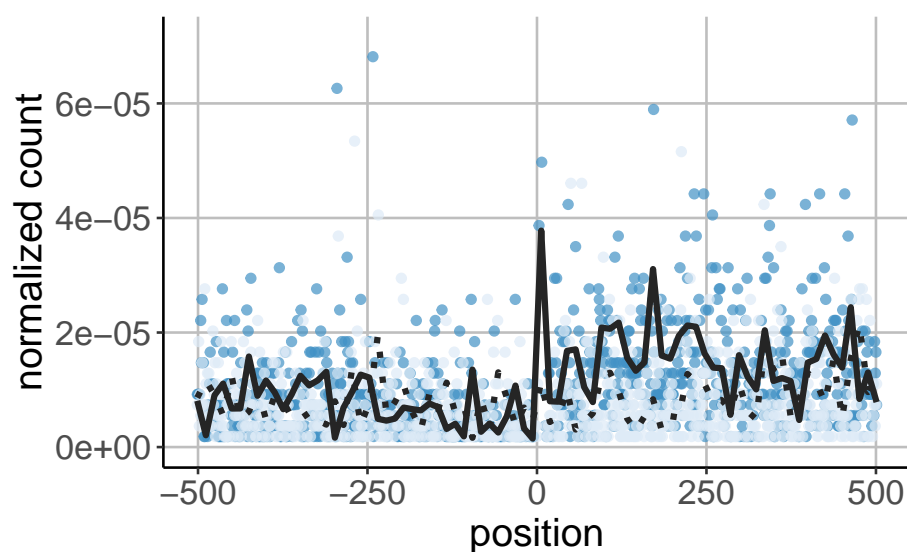

QKI-NUACUAACAWN

•• antisense — sense    • antisense • sense

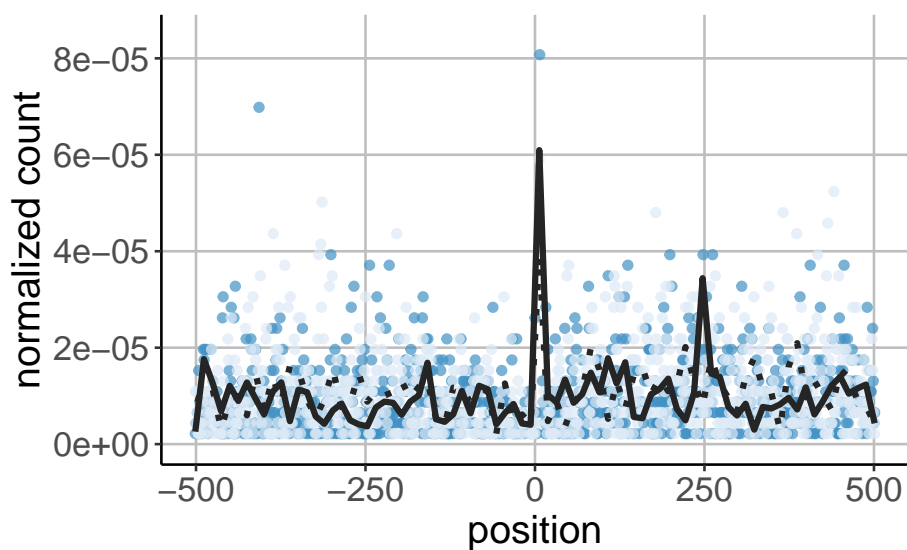

MCM3AP-CGCCAGUGCG

•• antisense — sense    • antisense • sense

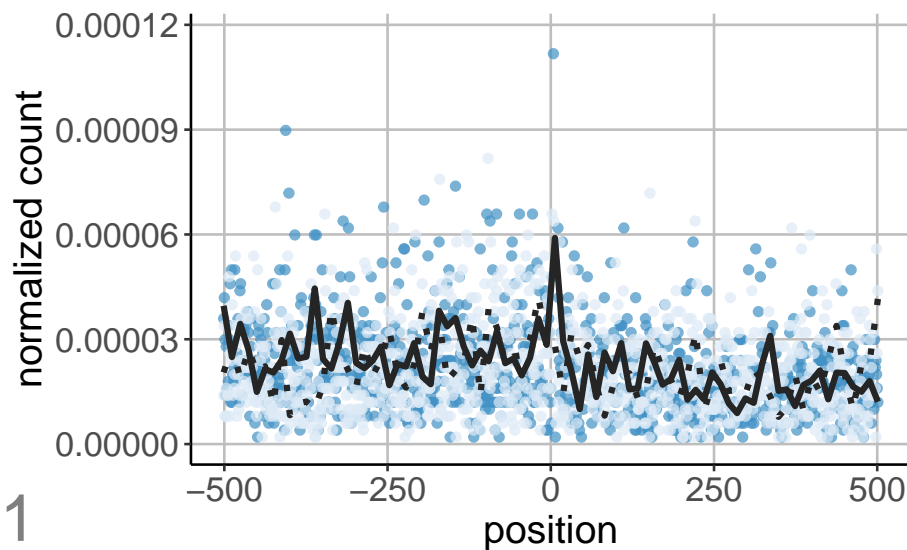

**STOPcodon**

HNRNPC-UUUUUGGUGG

• antisense — sense    • antisense • sense

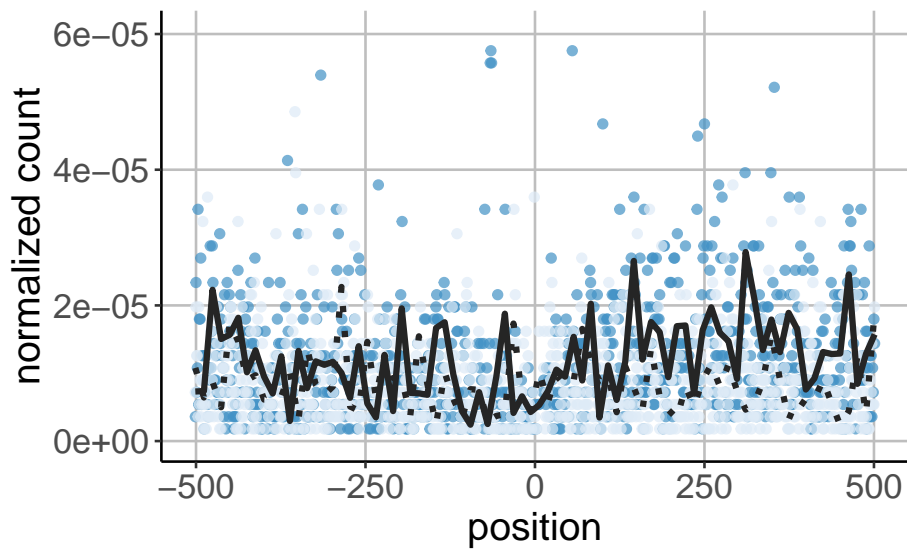

PABPC5-NUAKAAAKUURCN

• antisense — sense    • antisense • sense

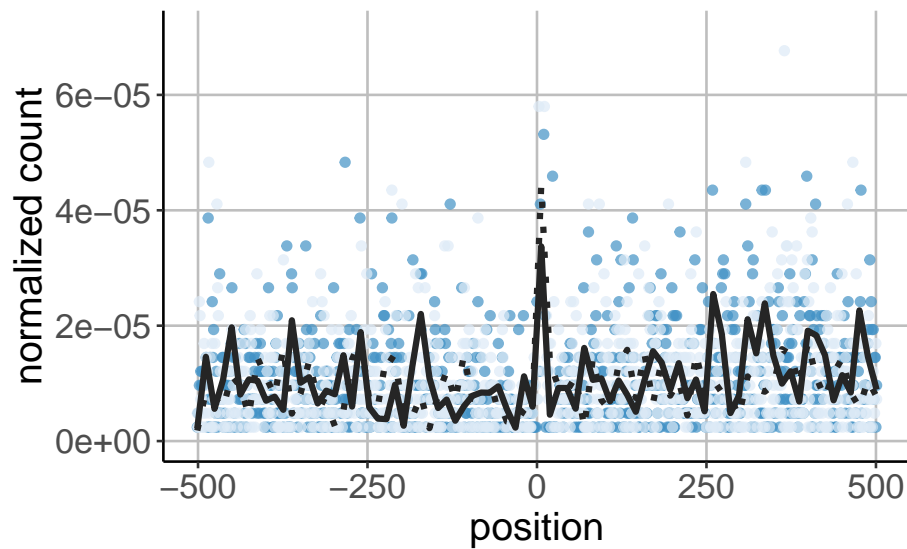

PABPC5-NUAKAAAUUACUACAN

• antisense — sense    • antisense • sense

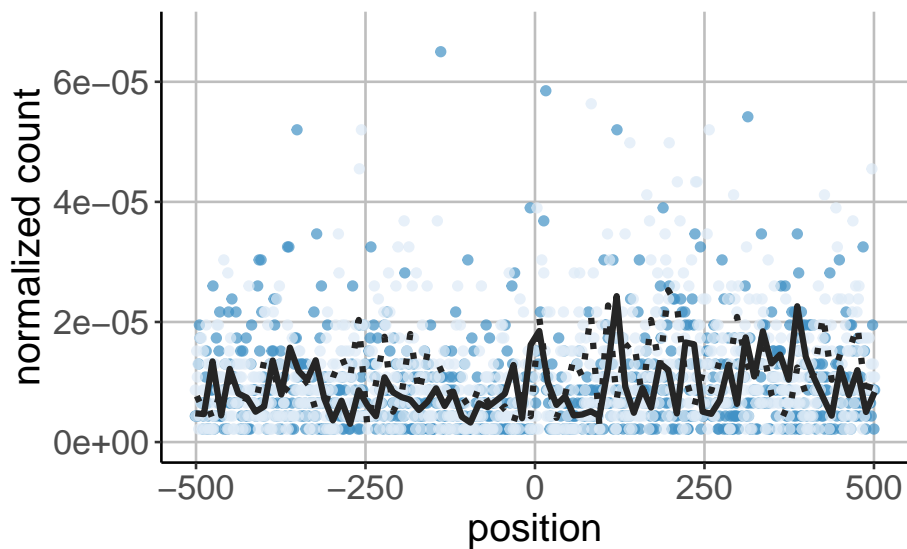

LARP7\_4-GRUCGUGAUGN

• antisense — sense    • antisense • sense

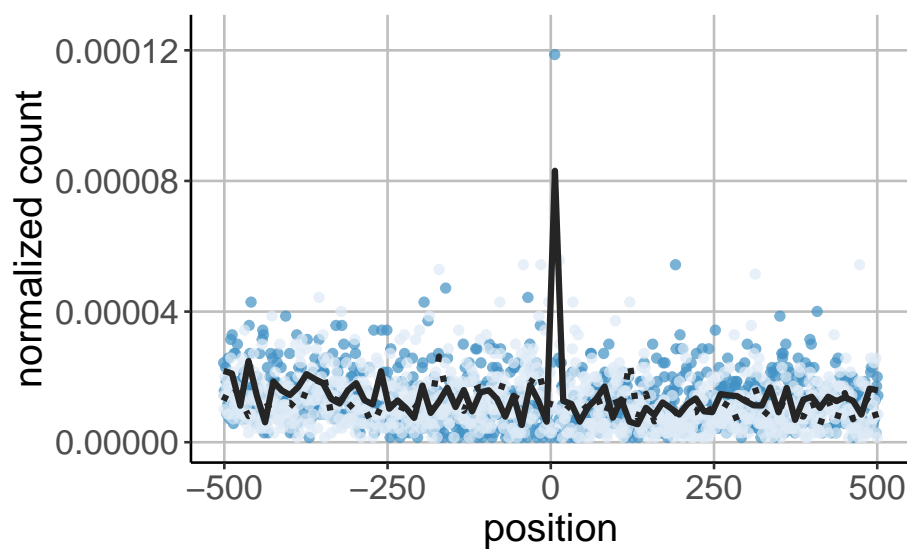

ZCRB1-GUAUUAAGGG

• antisense — sense    • antisense • sense

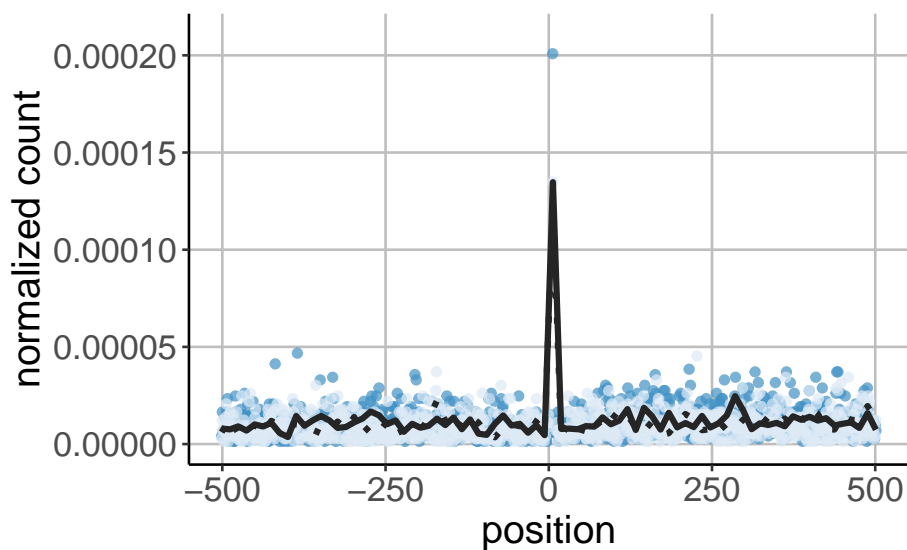

ZCRB1-GUGGACUUAANN

• antisense — sense    • antisense • sense

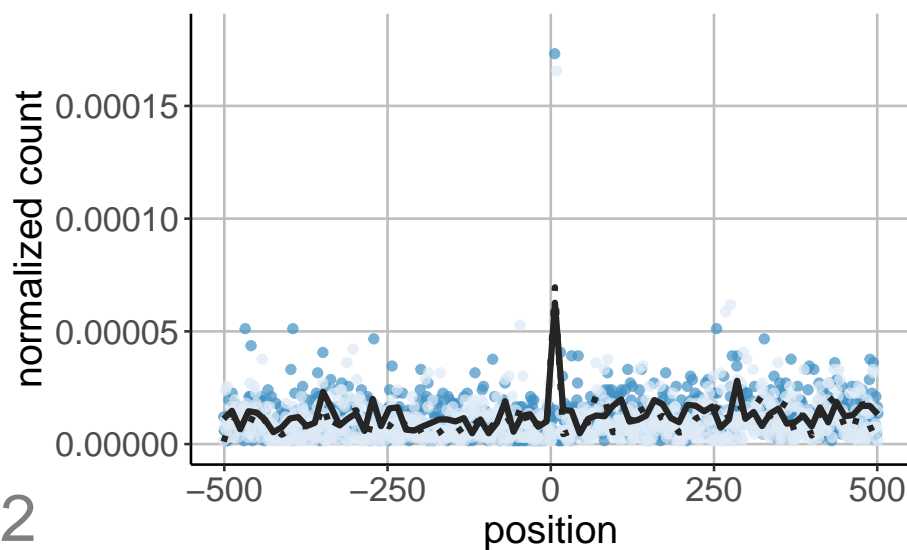

2

STOPcodon

RBM42-NGGAACUAAN

•• antisense — sense    • antisense • sense

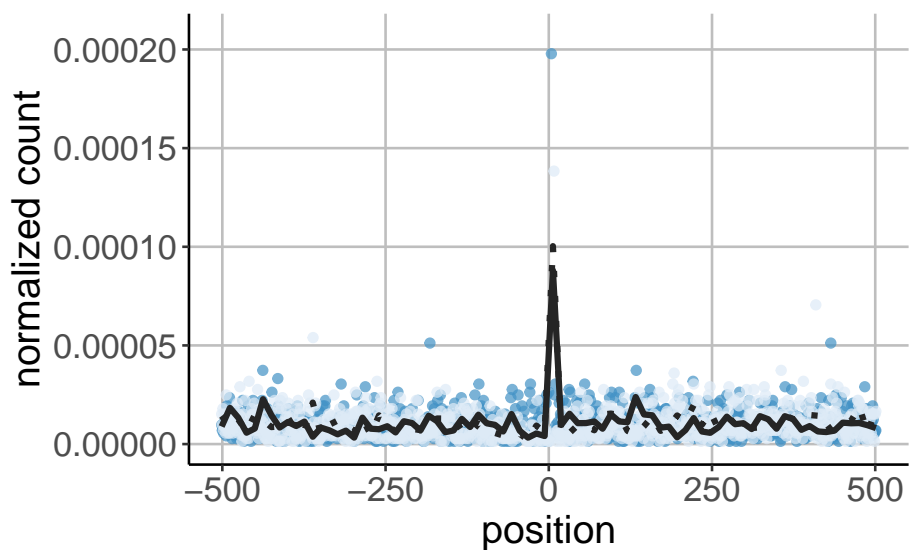

KHDRBS1-UAAUAGN

•• antisense — sense    • antisense • sense

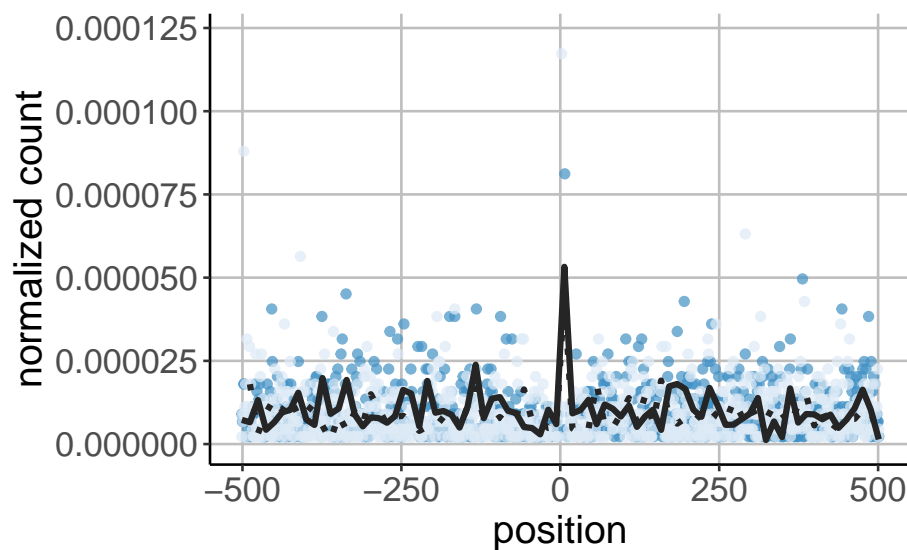

HNRNPCL1-GUUUUUUGGG

•• antisense — sense    • antisense • sense

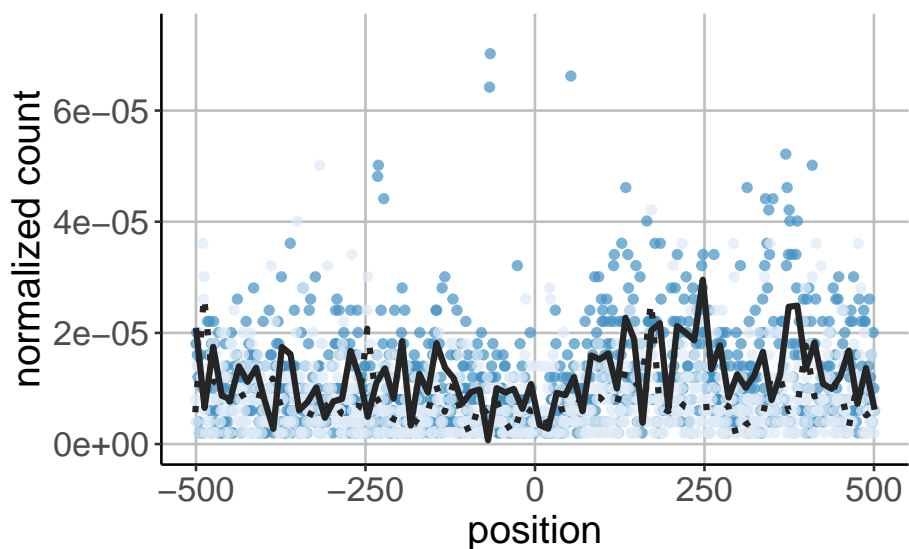

ZFR\_4-GUGACGGAUG

•• antisense — sense    • antisense • sense

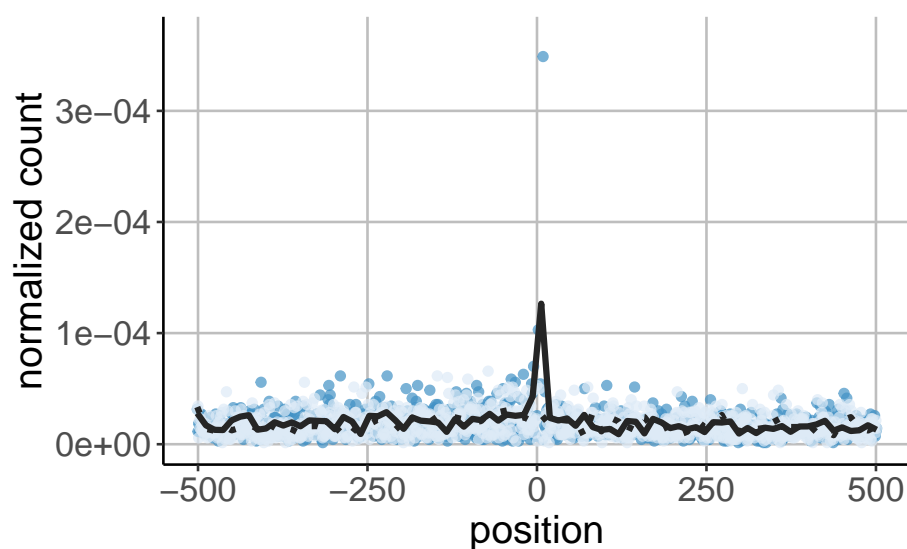

ZFR\_4-GUGCGGAUGN

•• antisense — sense    • antisense • sense

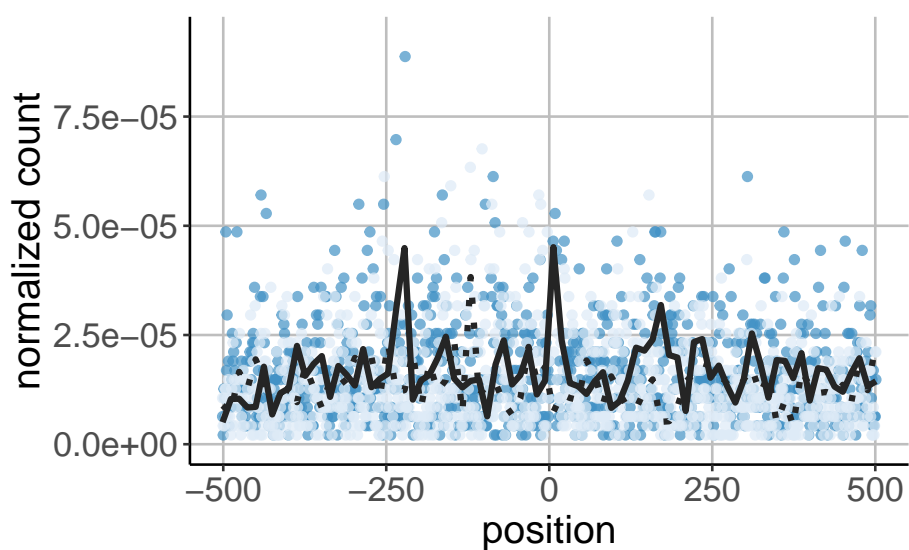

HNRPLL-GCAURCAYCC

•• antisense — sense    • antisense • sense

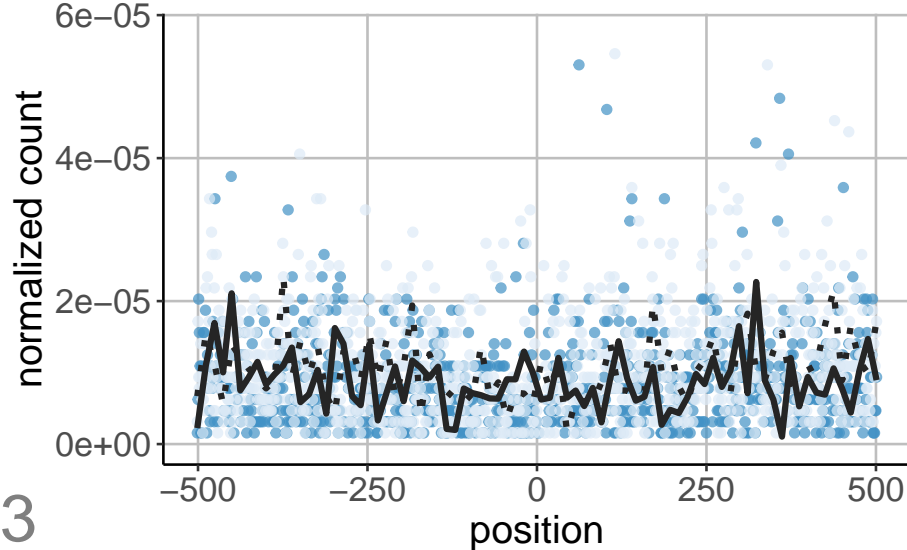

3

**STOPcodon**

ZC3H12C-NUGCGNCAGUCGGUAGC

•• antisense — sense    • antisense • sense

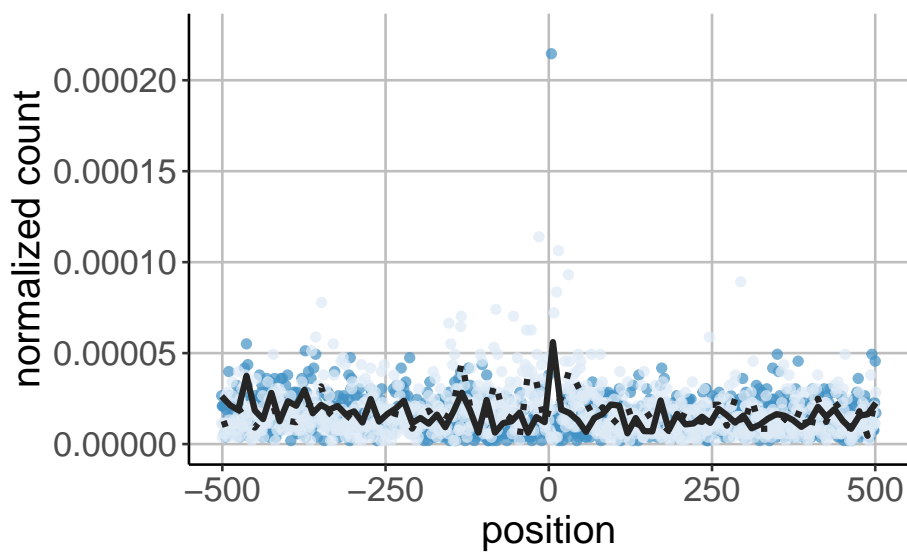

HNRNPL\_2-ACAUWWCAUW

•• antisense — sense    • antisense • sense

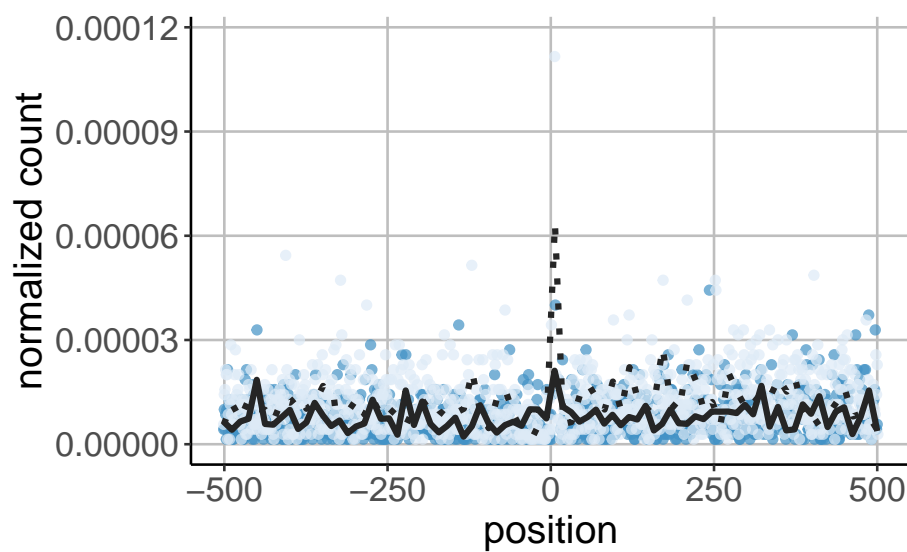

RBMS2-CAGUGAUUGG

•• antisense — sense    • antisense • sense

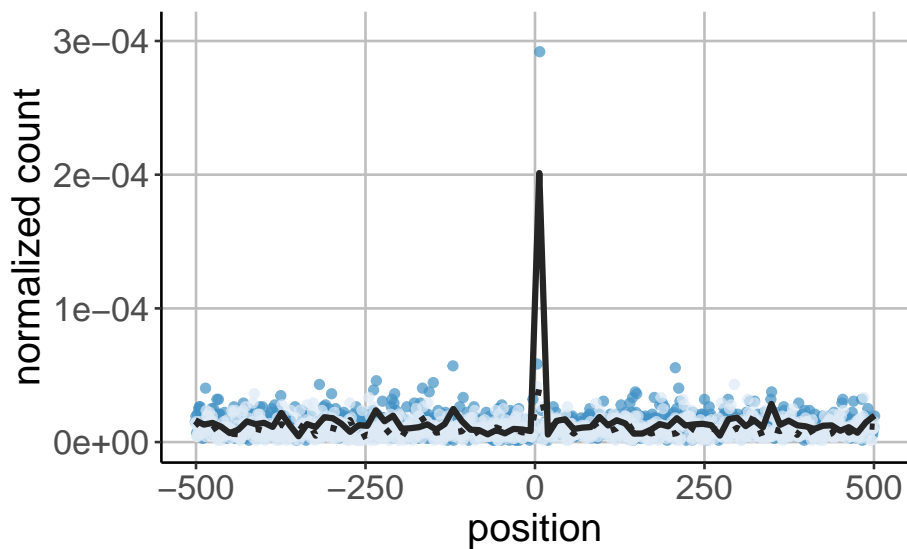

RBM14-GGKUGCGUCG

•• antisense — sense    • antisense • sense

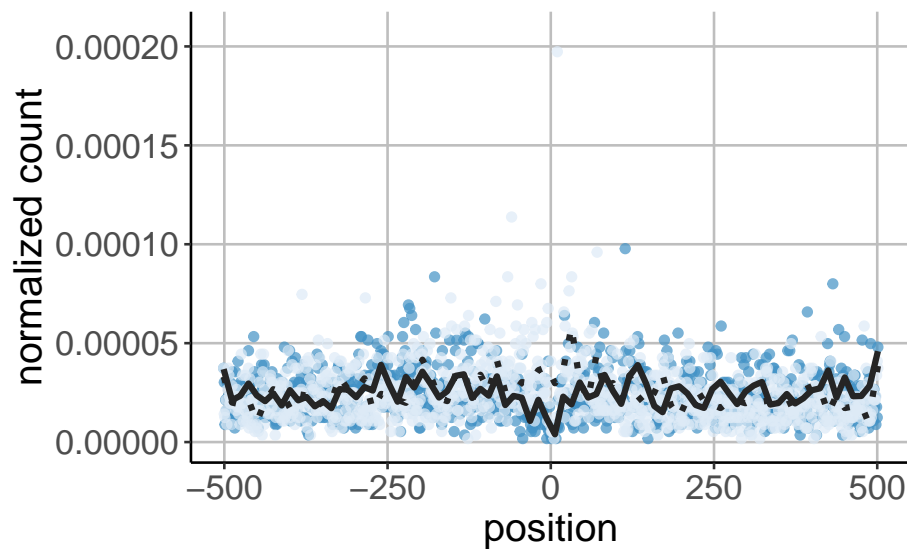

RBMS2-CGUAUAUAG

•• antisense — sense    • antisense • sense

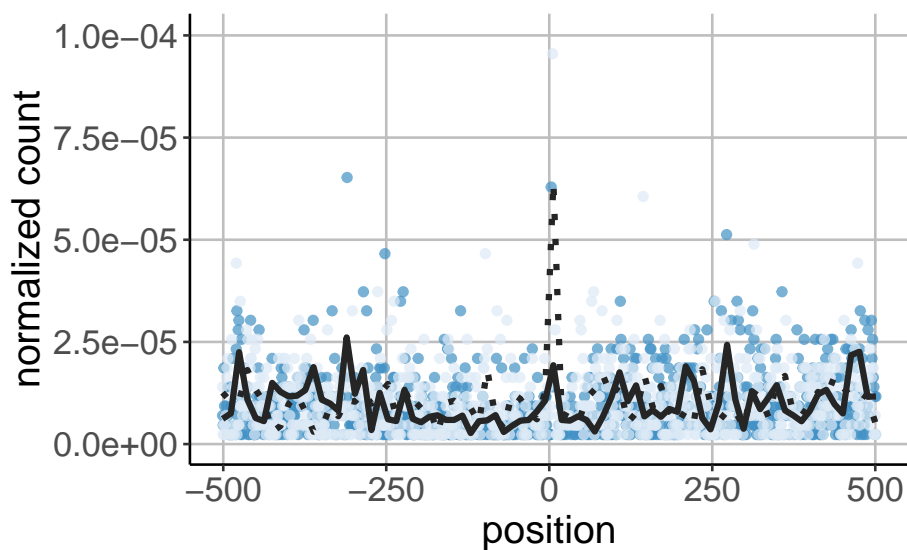

RBMS1-GUAUUUAKNGGG

•• antisense — sense    • antisense • sense

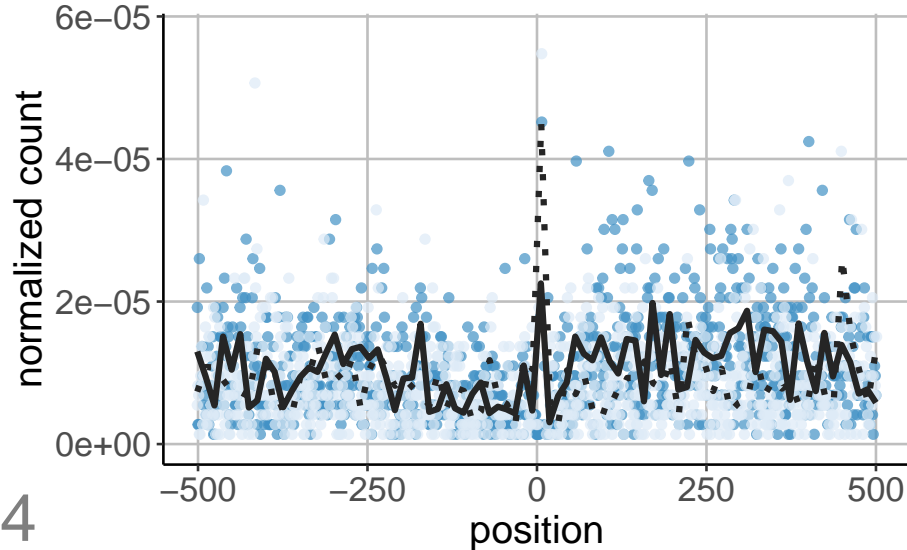

4

STOPcodon

RBMS1-UUAUAAUCAAC

•• antisense — sense    • antisense • sense

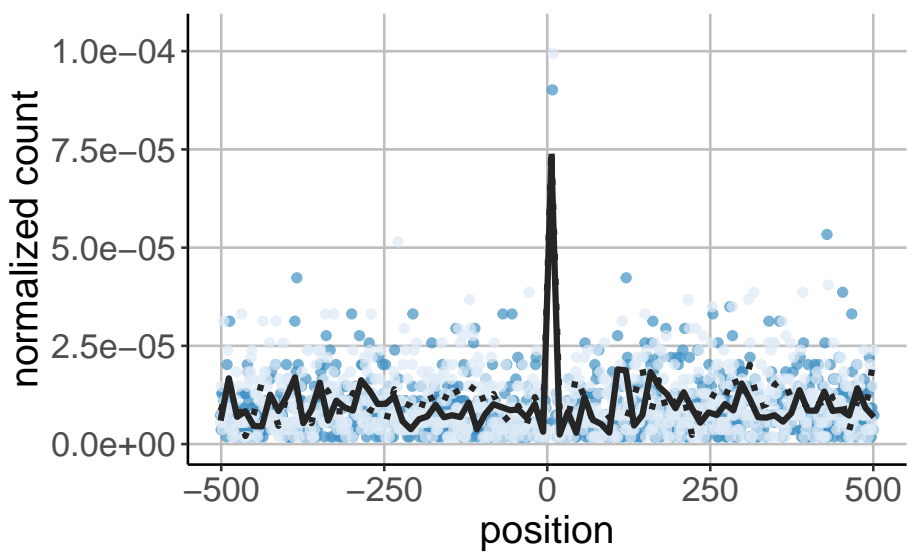

NOVA2\_3-UCAUUCAU

•• antisense — sense    • antisense • sense

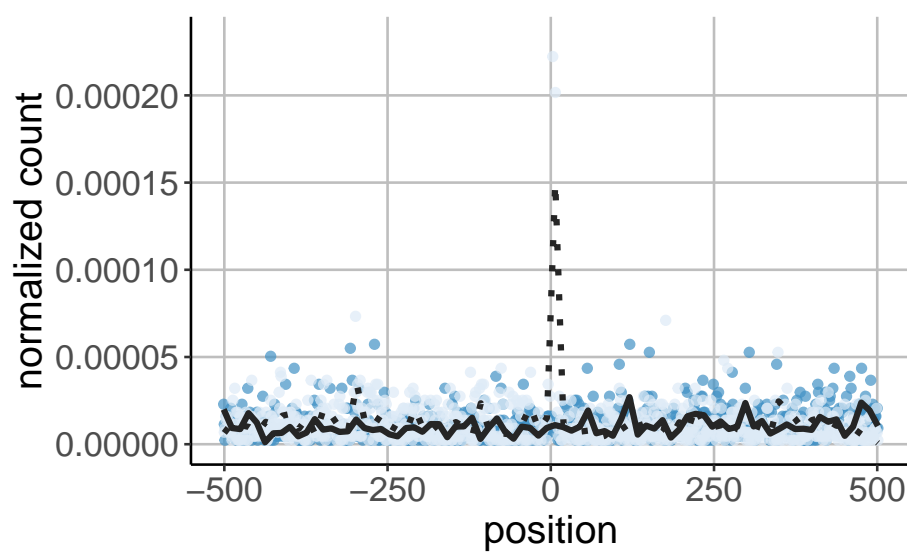

ZFP36-KUAUUUAUGGUGG

•• antisense — sense    • antisense • sense

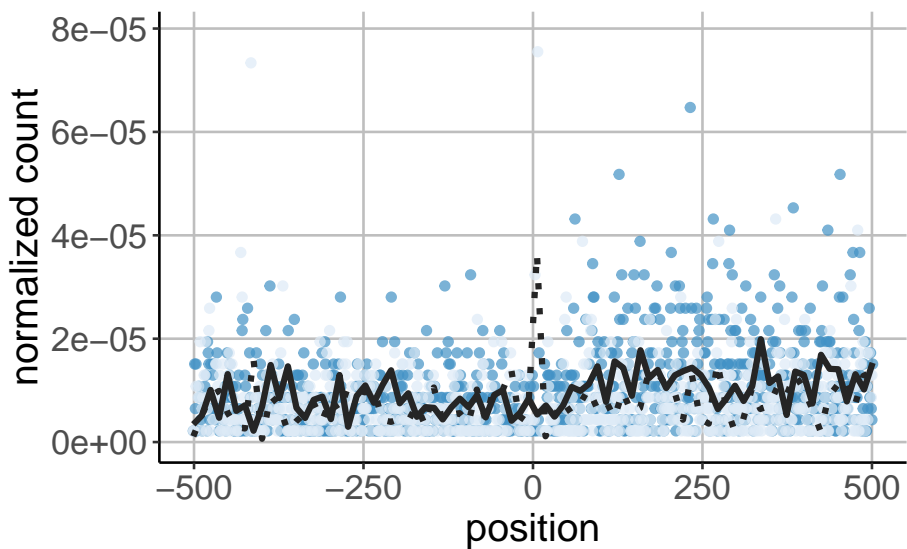

ZFP36-UUAUUUAUU

•• antisense — sense    • antisense • sense

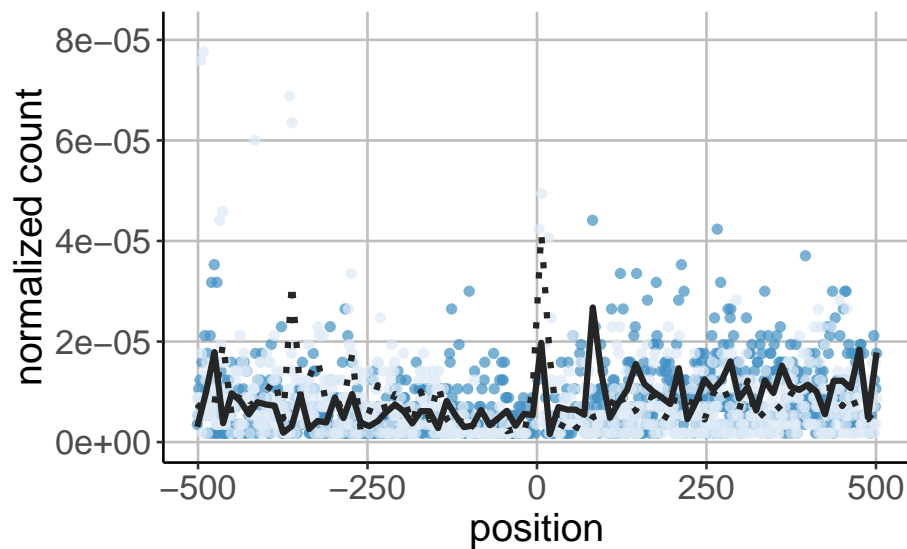

ELAVL4-UUUUAUUUUG

•• antisense — sense    • antisense • sense

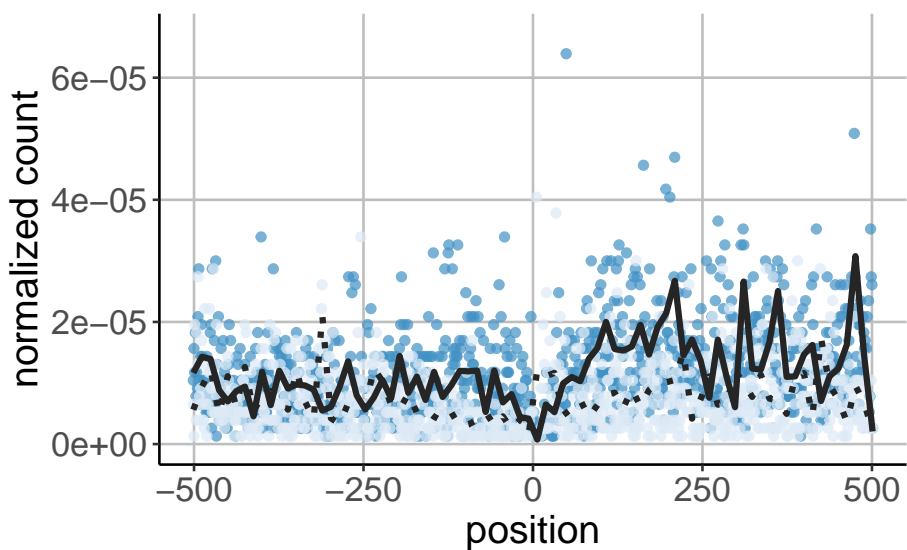

QKI-ACUAACANNACUAACA

•• antisense — sense    • antisense • sense

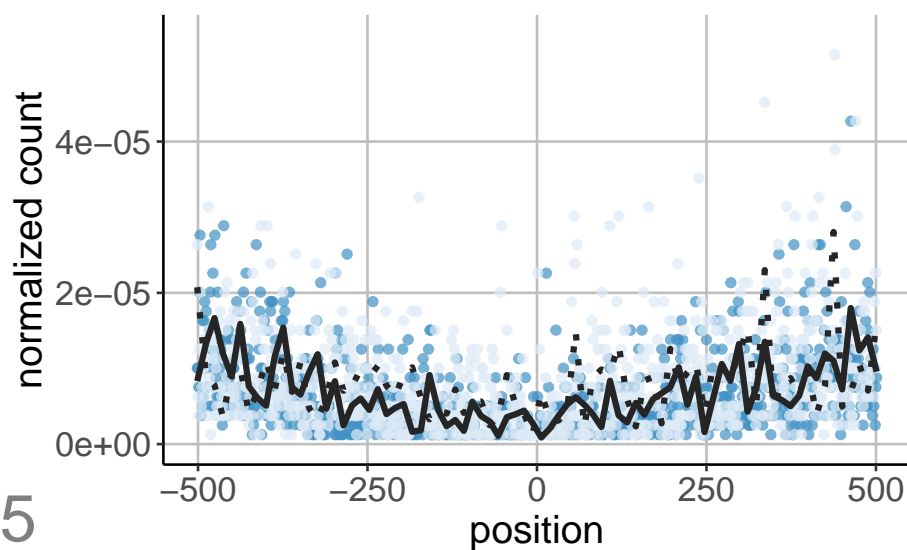

**STOPcodon**

TARDBP-GUGUGAAUGG

•• antisense — sense    • antisense • sense

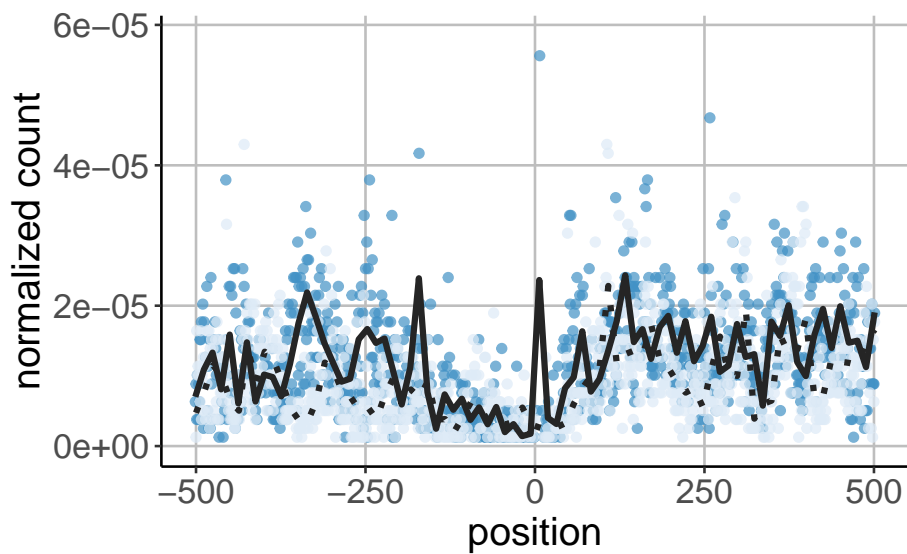

TARDBP-GUGUGNGUGUG

•• antisense — sense    • antisense • sense

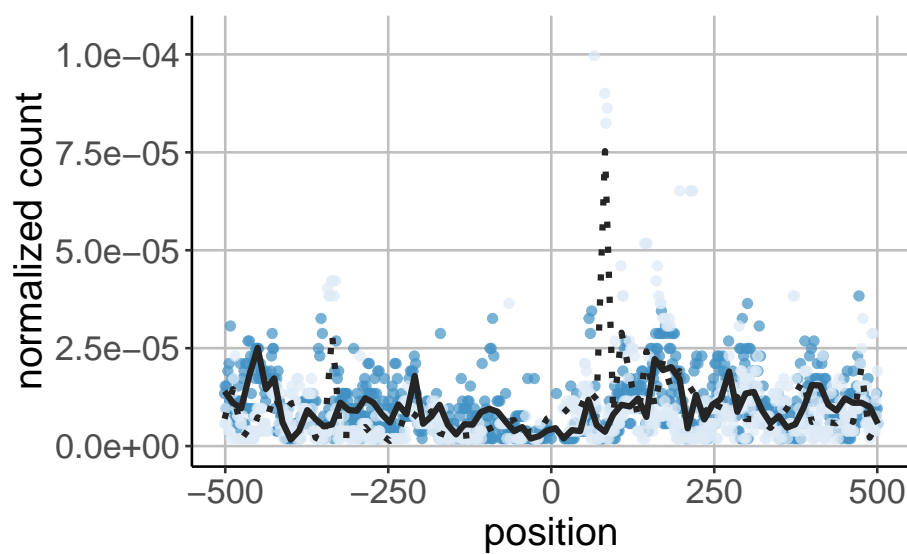

PUM2-NNUGUAYAGK

•• antisense — sense    • antisense • sense

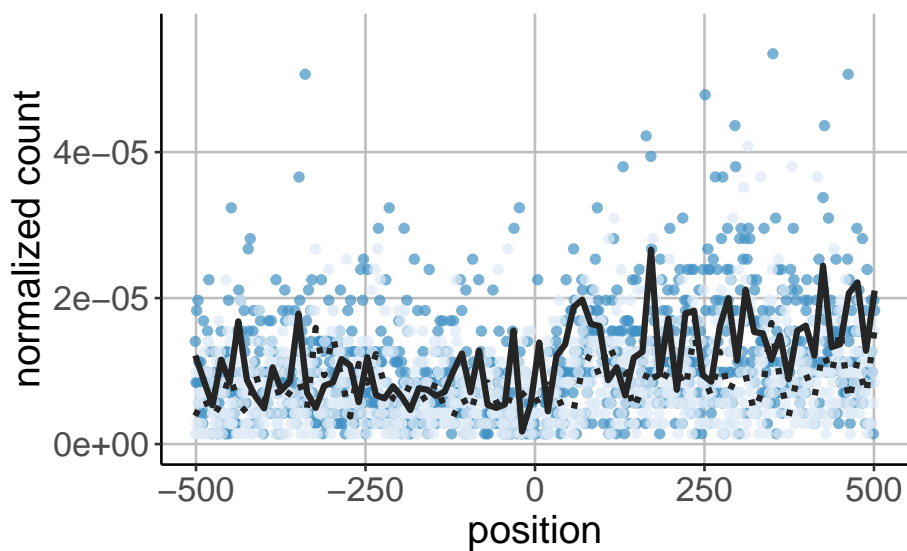

PUM2-NUGUAAAUAGKN

•• antisense — sense    • antisense • sense

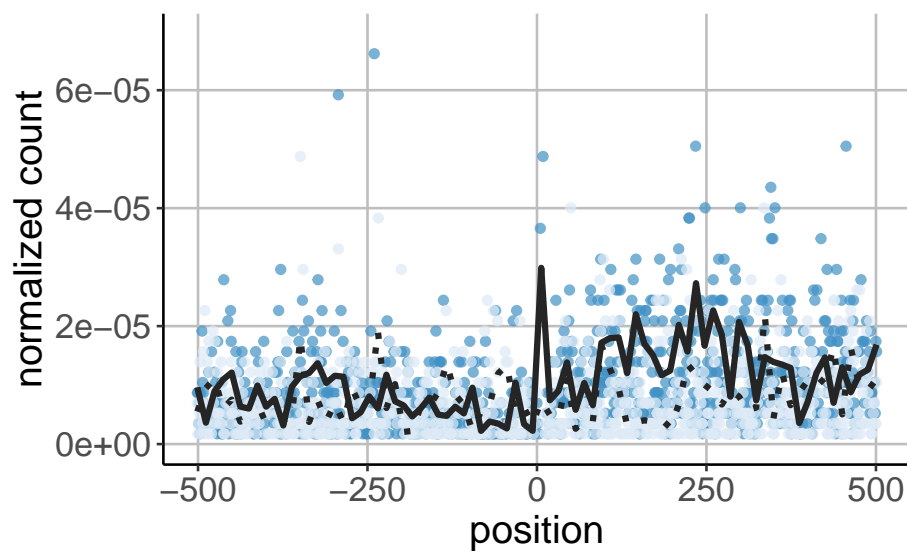

KHDRBS3-UAAANNNNNNNUAAA

•• antisense — sense    • antisense • sense

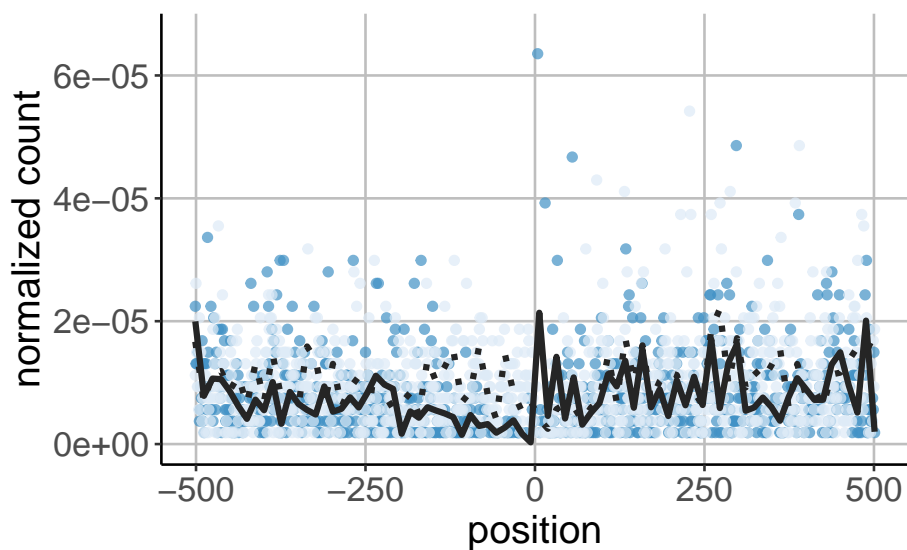

THUMPD1-UUCGUGGCUUG

•• antisense — sense    • antisense • sense

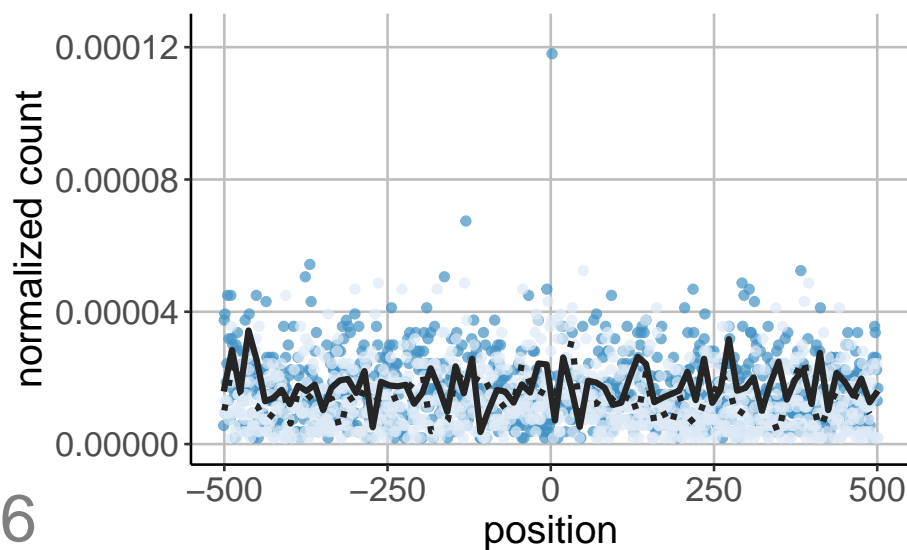

6

**STOPcodon**

THUMPD1-WGCGCGGUYUU

•• antisense — sense    • antisense • sense

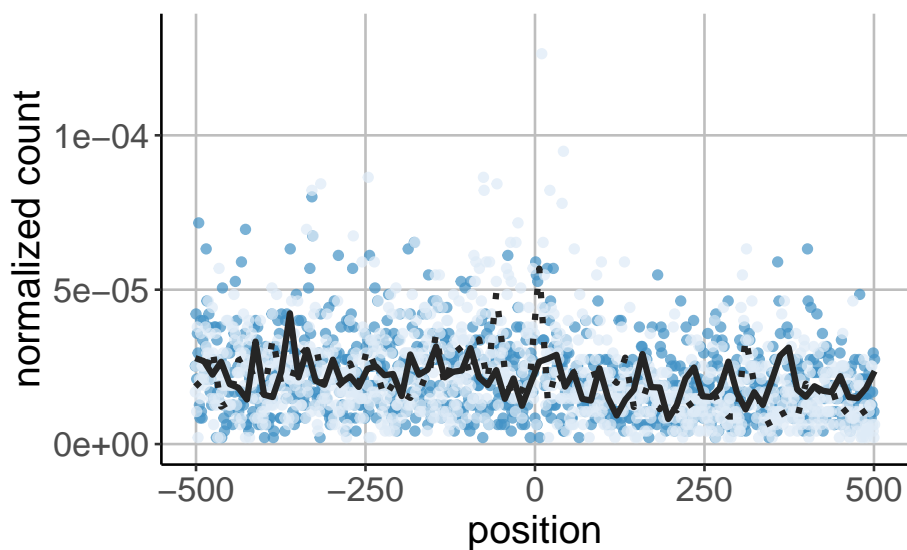

ZFR\_4-GGCACGGAUG

•• antisense — sense    • antisense • sense

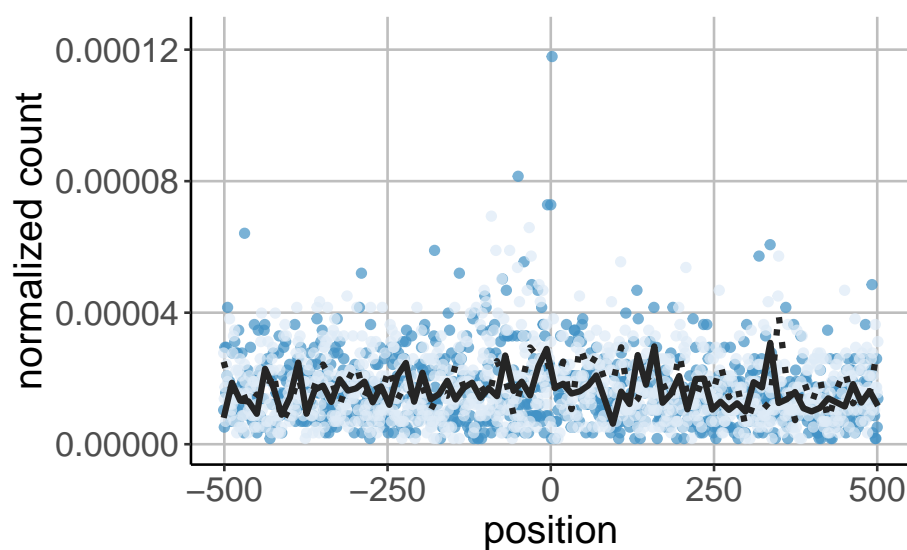

ZFR\_4-UUGCCGGAUGYCGU

•• antisense — sense    • antisense • sense

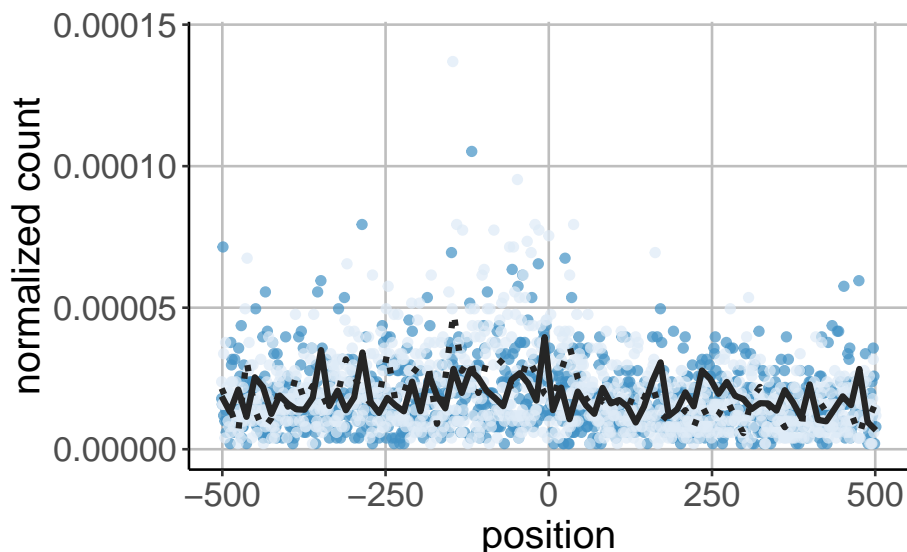

PCBP1-UCCUUNNCCUU

•• antisense — sense    • antisense • sense

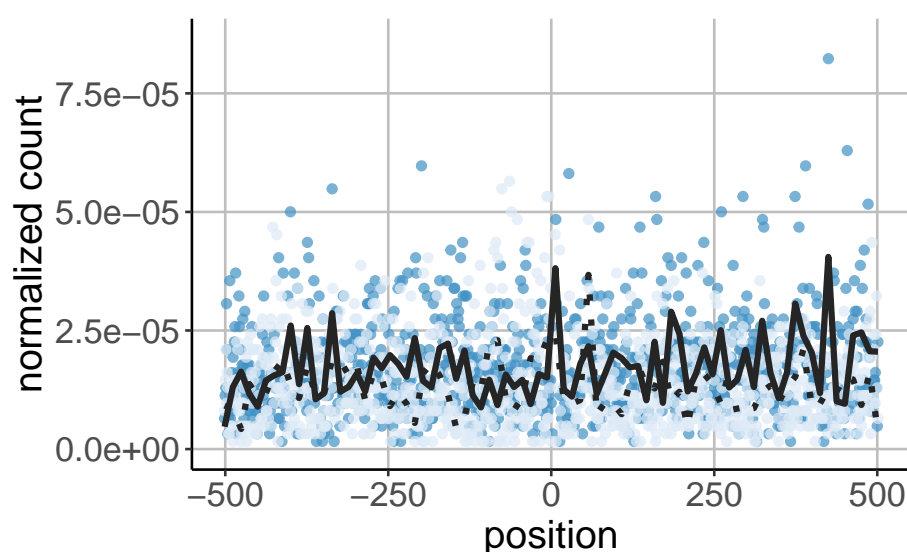

HNRNPA3-UAGGUUAGGG

•• antisense — sense    • antisense • sense

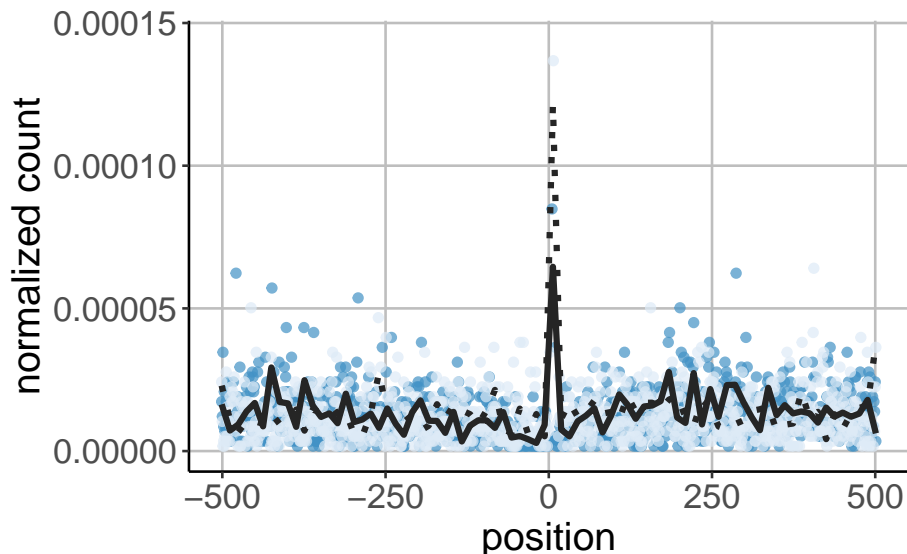

RBM38-KKGUGUGUGUGUUKK

•• antisense — sense    • antisense • sense

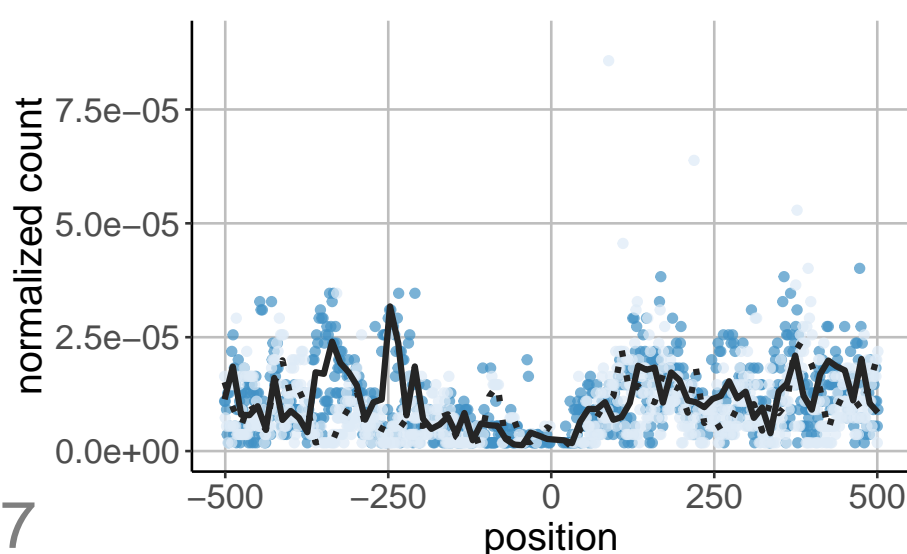



**STOPcodon**

MEX3D-UNURUUUAUU

•• antisense — sense    • antisense • sense

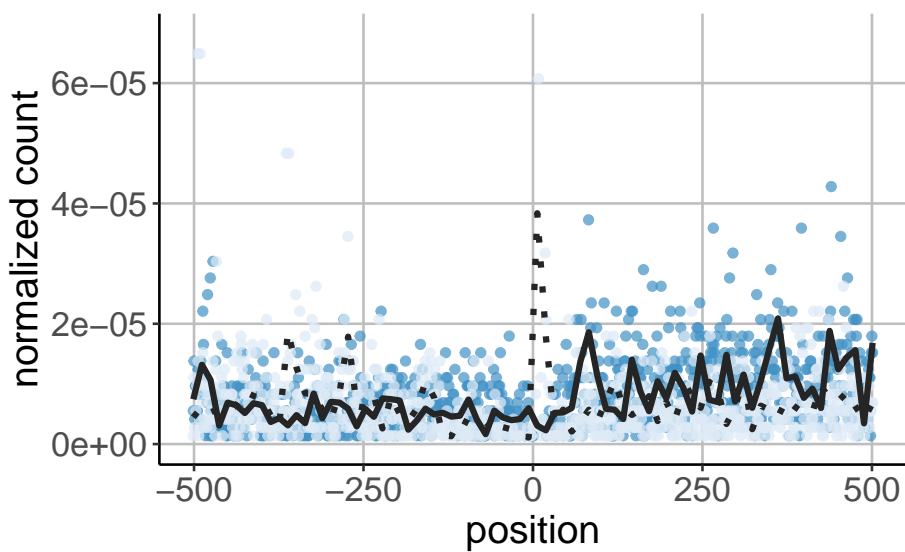

RBPM2-CACAGNGCACA

•• antisense — sense    • antisense • sense

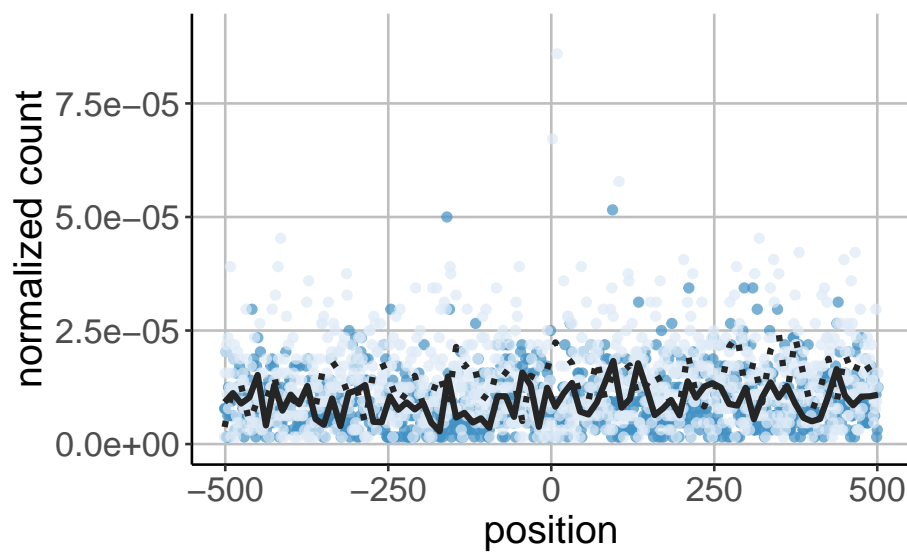

RBPM2-UCACRUGCACA

•• antisense — sense    • antisense • sense

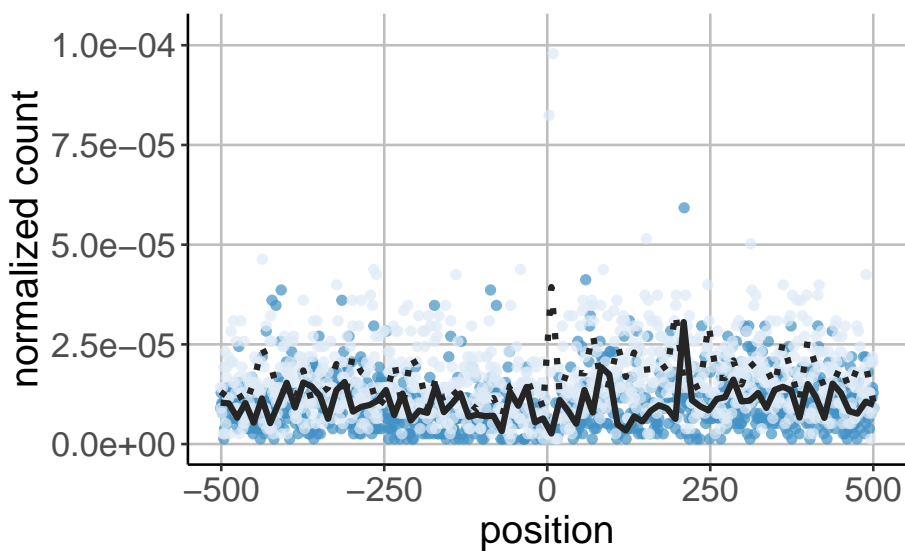

RBPM2-UGCACA

•• antisense — sense    • antisense • sense

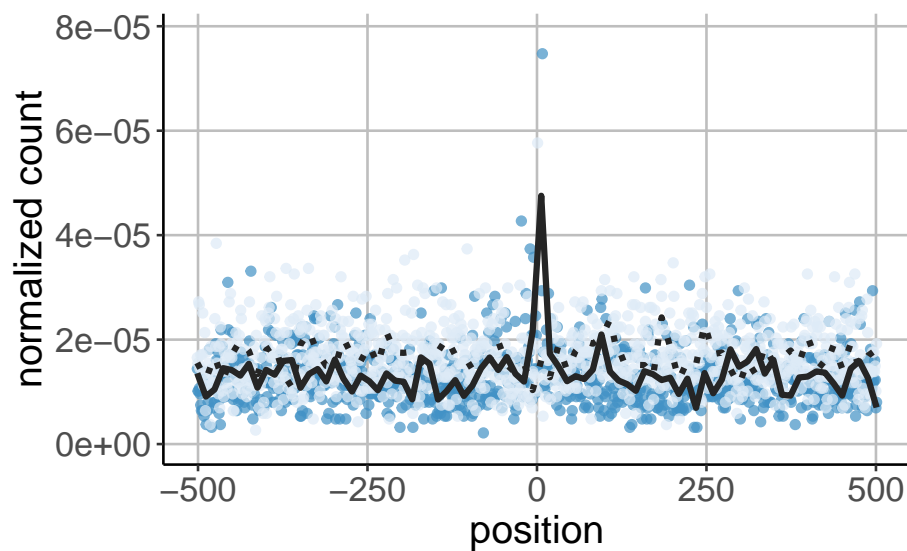

YBX2-GCCAUNNNAUCGC

•• antisense — sense    • antisense • sense

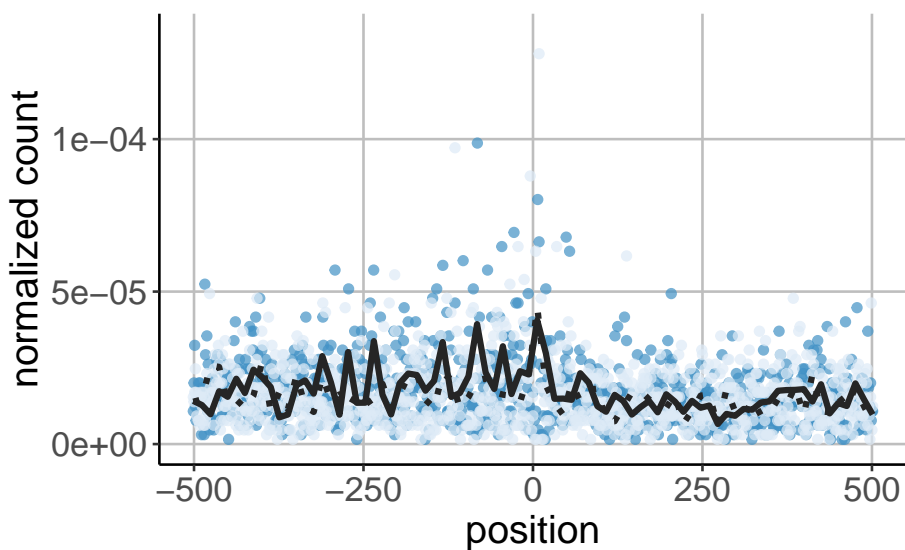

YBX2-NUAACAUCNN

•• antisense — sense    • antisense • sense

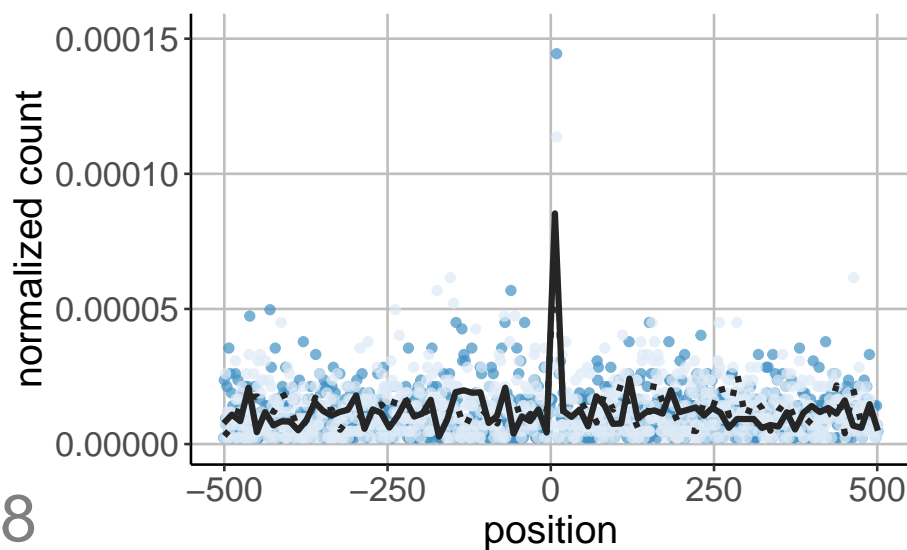

STOPcodon

CSTF2T-CGUAGCGUCU

•• antisense — sense    • antisense • sense

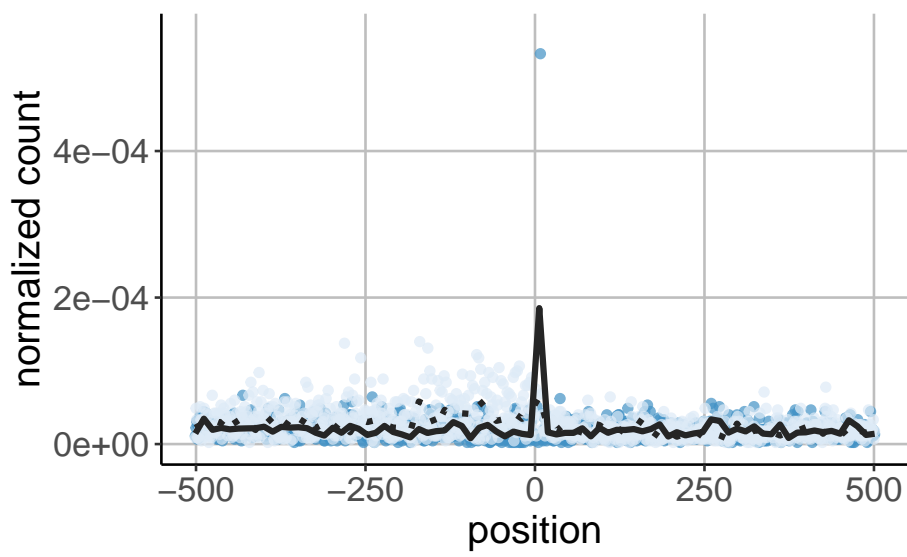

SNRNP70-GNUCANGNNG

•• antisense — sense    • antisense • sense

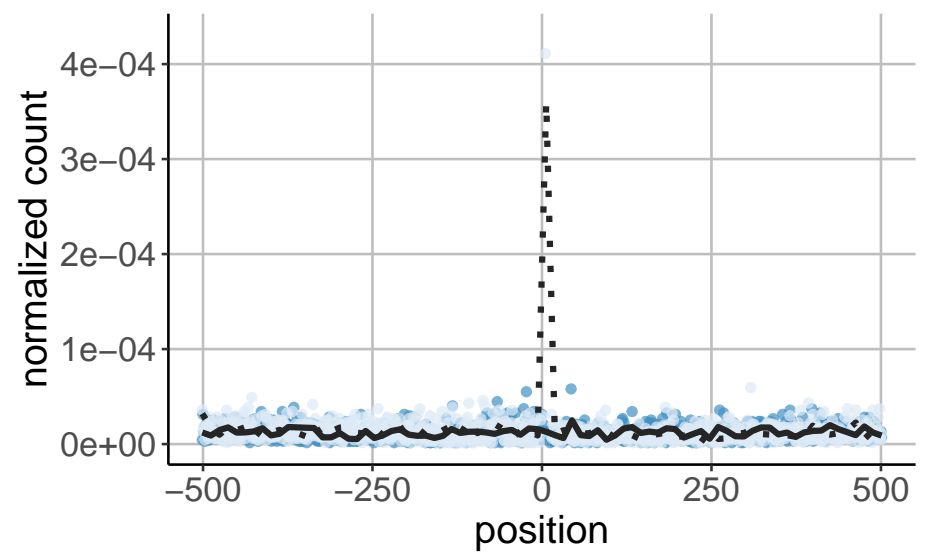

SNRNP70-GUUCAAGGUG

•• antisense — sense    • antisense • sense

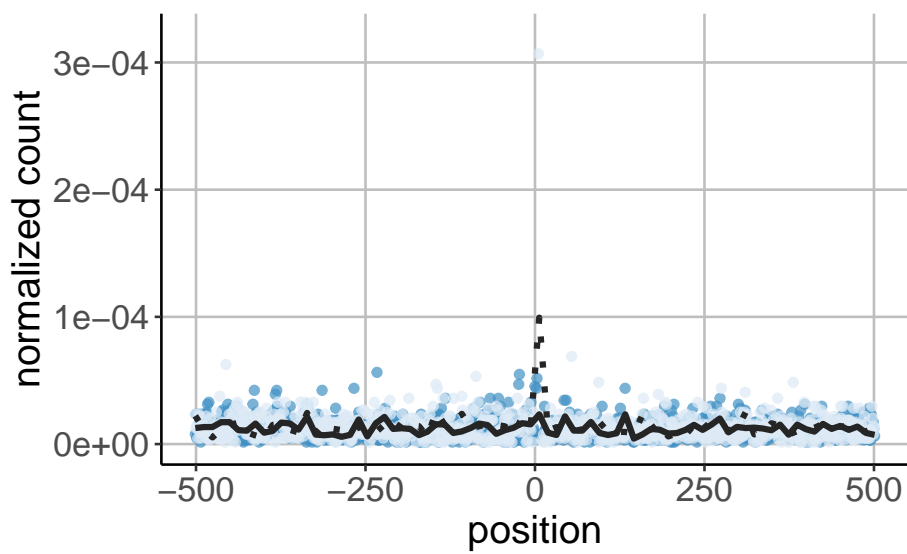

DAZ4-GYUCUAGUUAGYAUC

•• antisense — sense    • antisense • sense

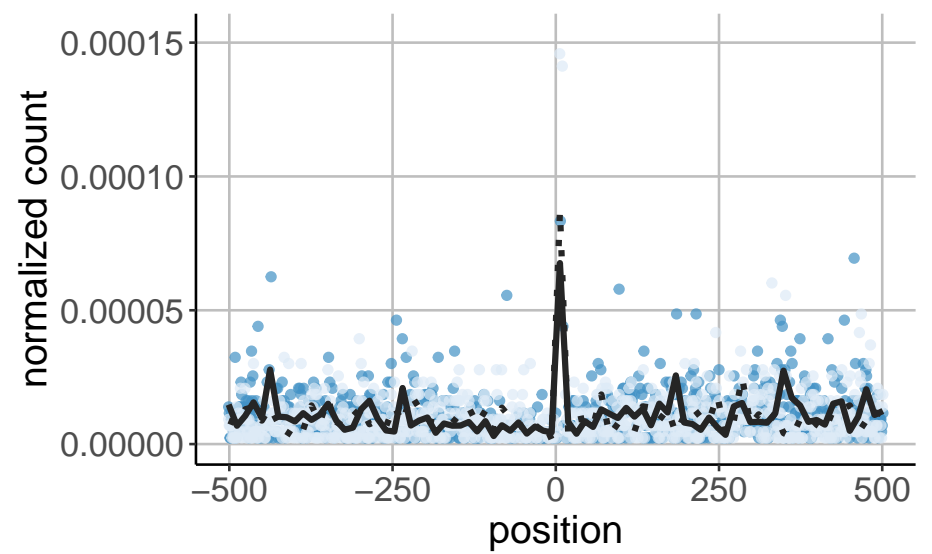

IGF2BP1-CAGNUWCA

•• antisense — sense    • antisense • sense

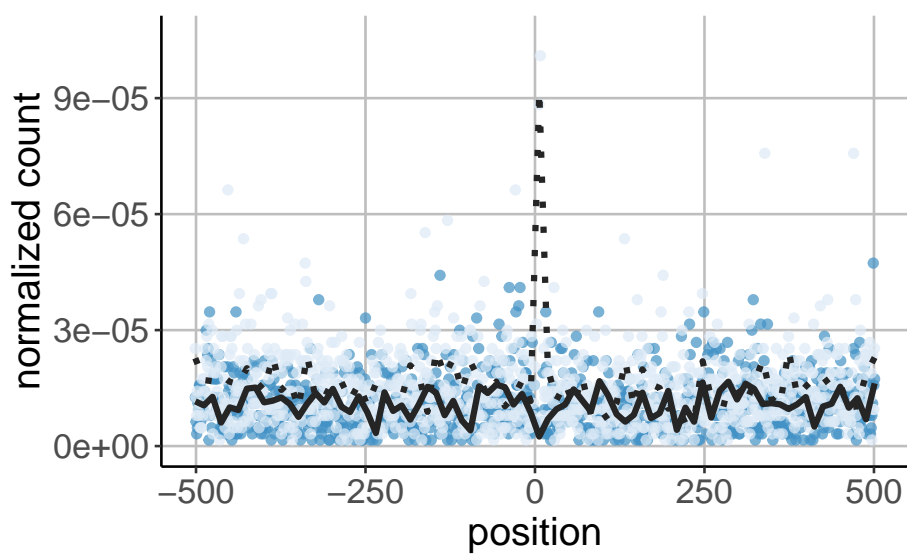

HEXIM2-NGCGACGGKN

•• antisense — sense    • antisense • sense

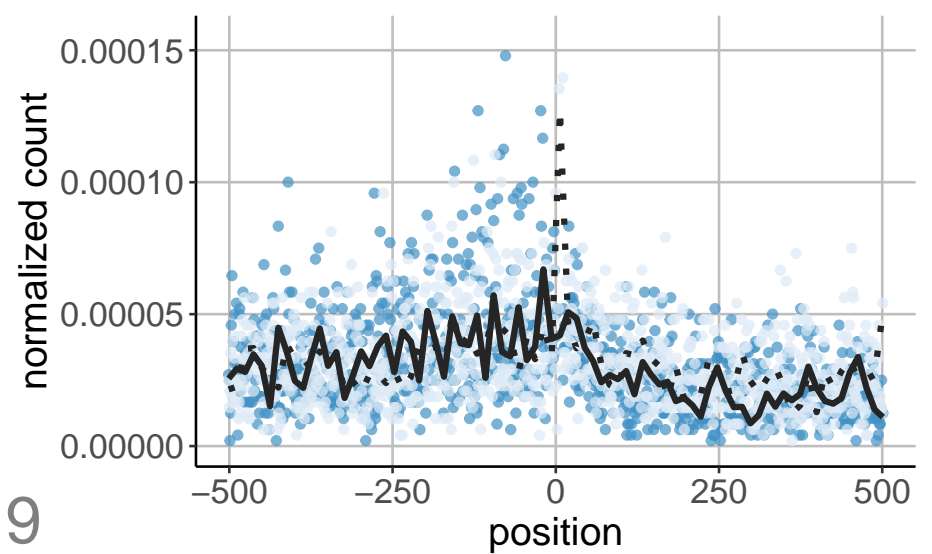

9

STOPcodon

YBX1-NUAACAUCGGG

•• antisense — sense    • antisense • sense

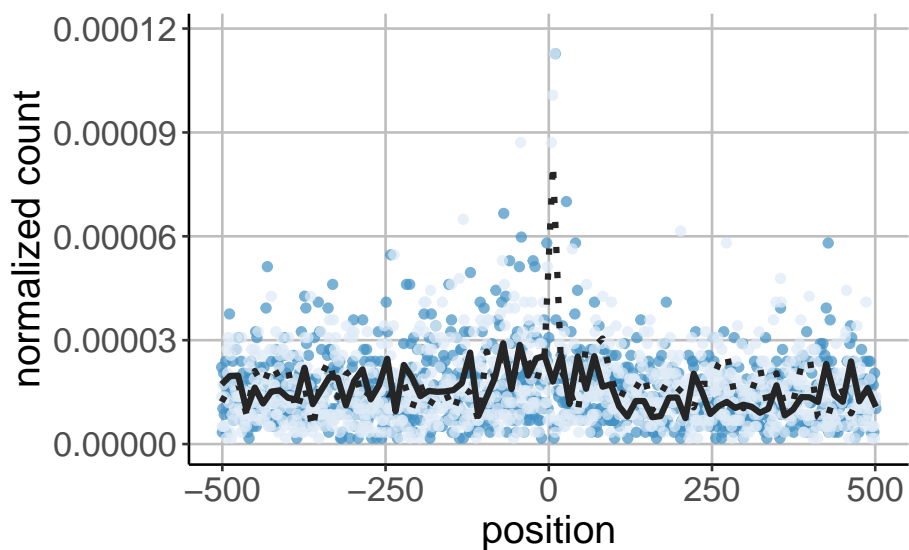

RBM24-GUGUGNGUGUG

•• antisense — sense    • antisense • sense

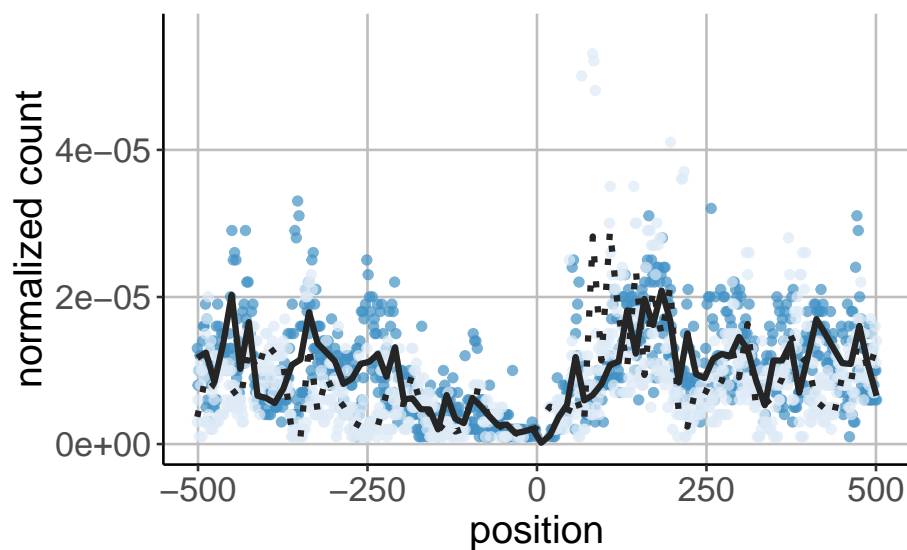

CSDA-UAACAUCA

•• antisense — sense    • antisense • sense

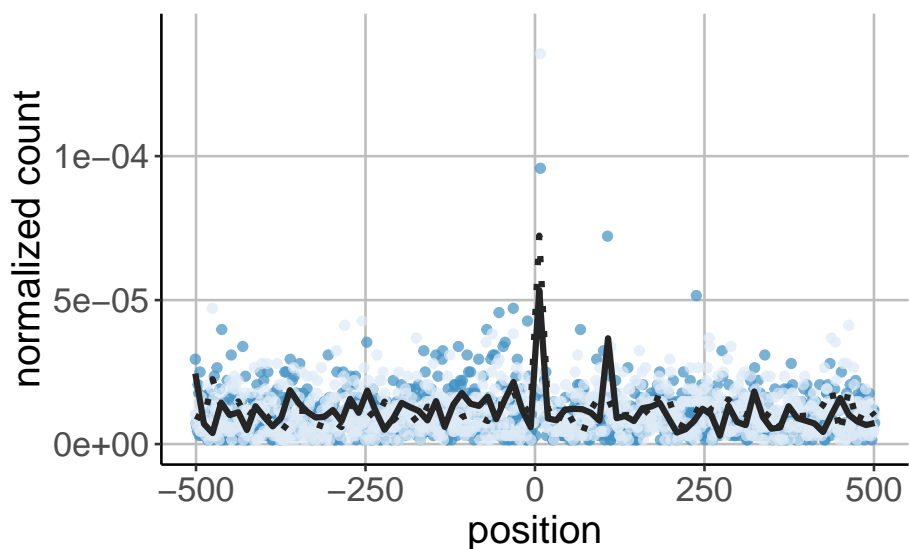

HNRNPA1L2-NUAGGUUAGGGW

•• antisense — sense    • antisense • sense

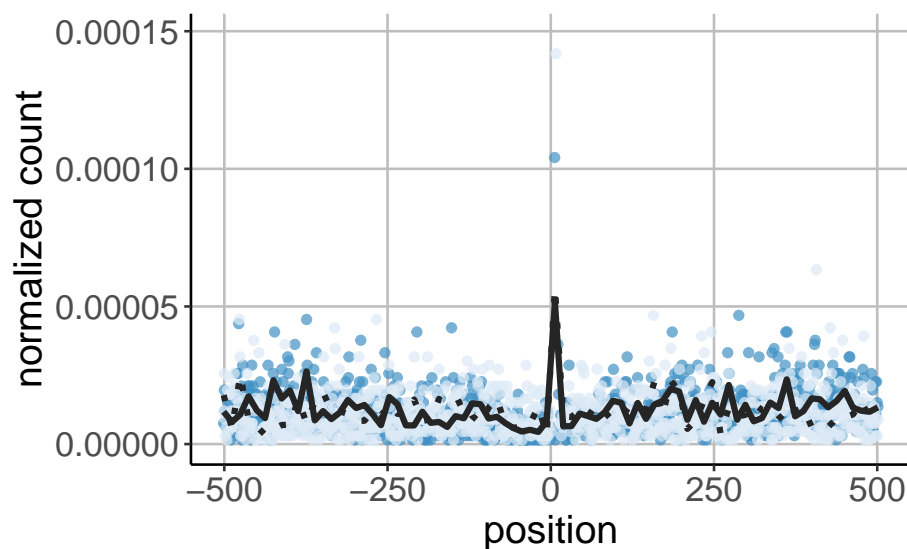

ZC3H12B-NGCGNCAGUCGGUAGCN

•• antisense — sense    • antisense • sense

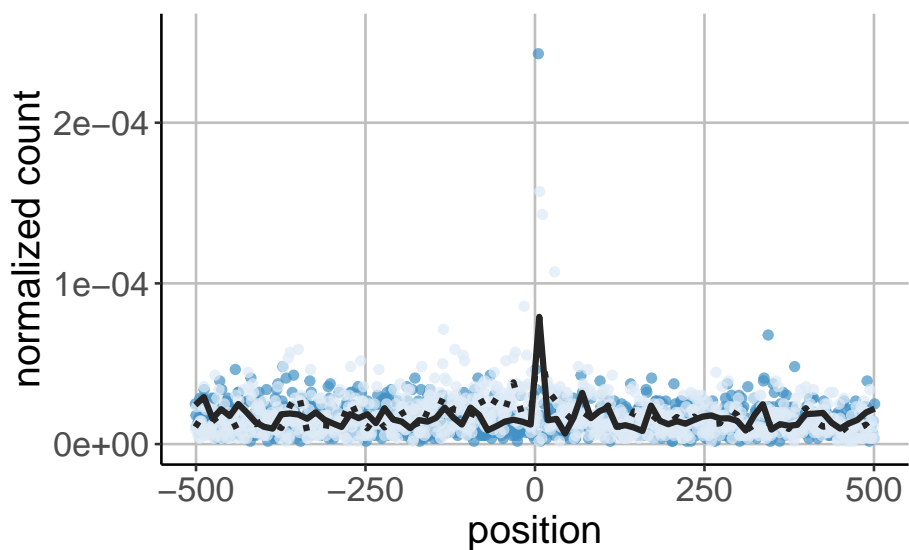

ZC3H12A-NUUGCCAWAGUKU

•• antisense — sense    • antisense • sense

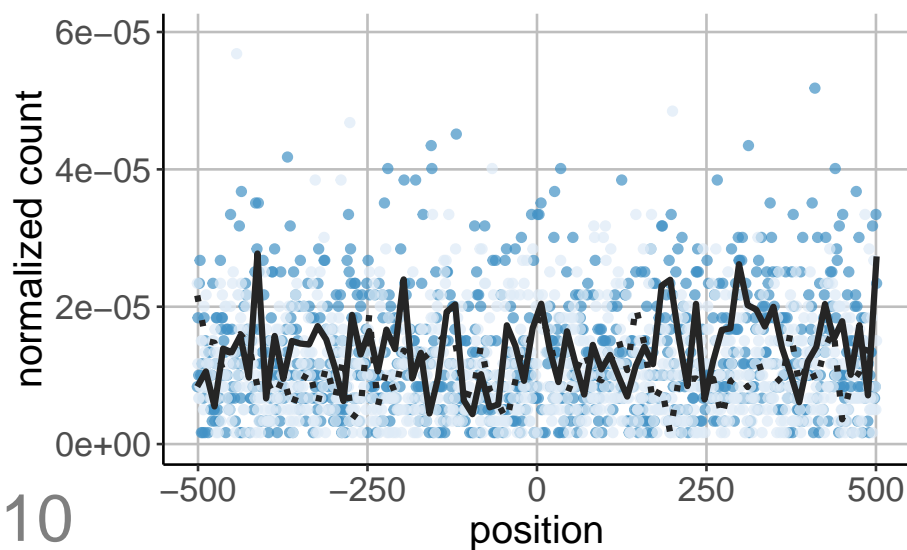

10

STOPcodon

DAZAP1-UUAGGUUAGG

•• antisense — sense    • antisense • sense

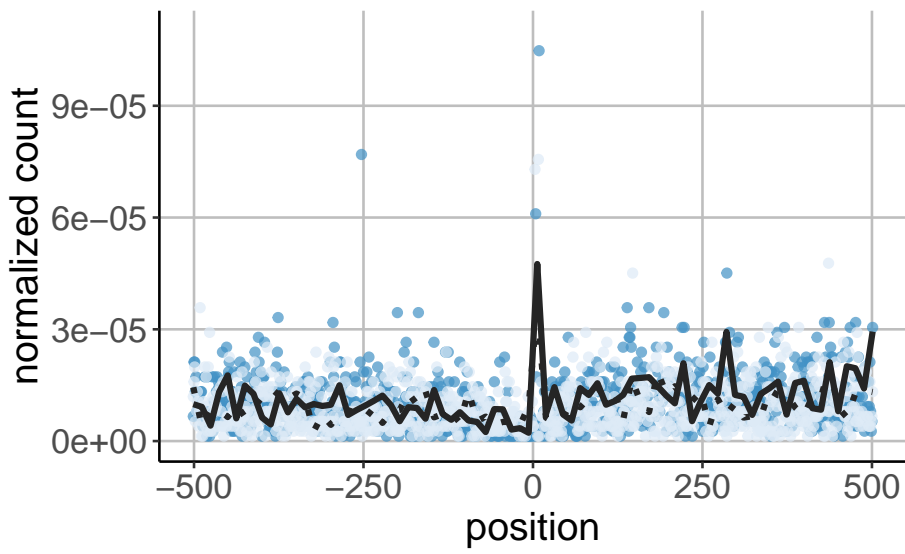

CARHSP1-GCCAUGAUCAUGAU

•• antisense — sense    • antisense • sense

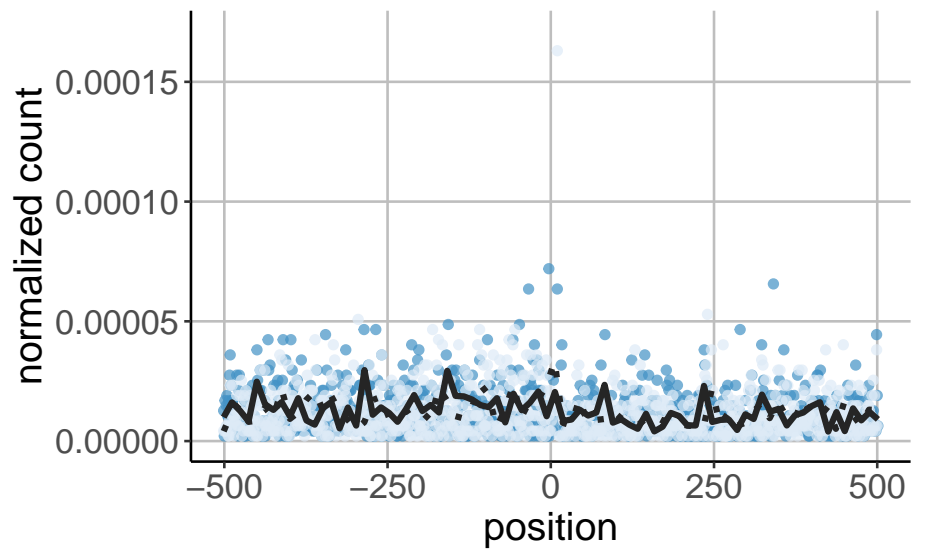

CARHSP1-UUGCCUUGUCCCGAU

•• antisense — sense    • antisense • sense

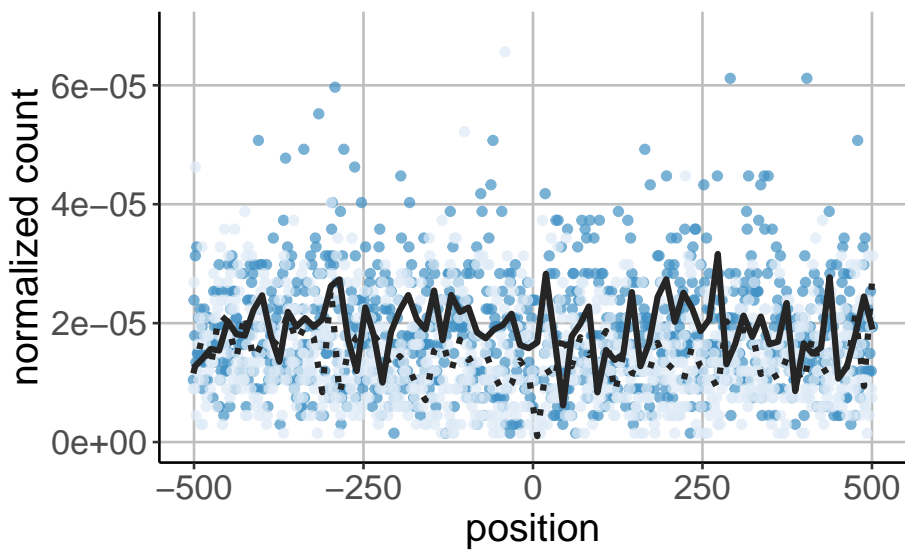

RNPC3-GGGUSUACGGGGU

•• antisense — sense    • antisense • sense

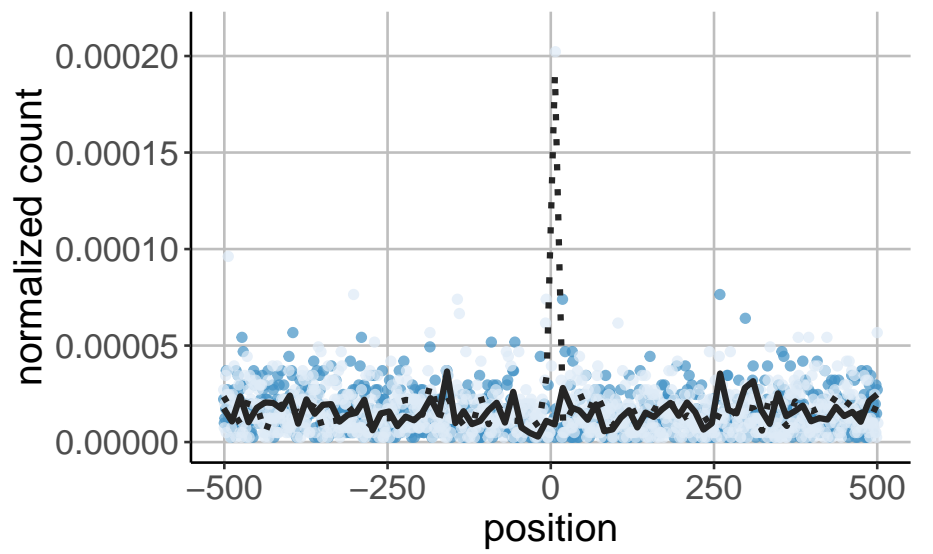

ELAVL1-UUUAUGNUUU

•• antisense — sense    • antisense • sense

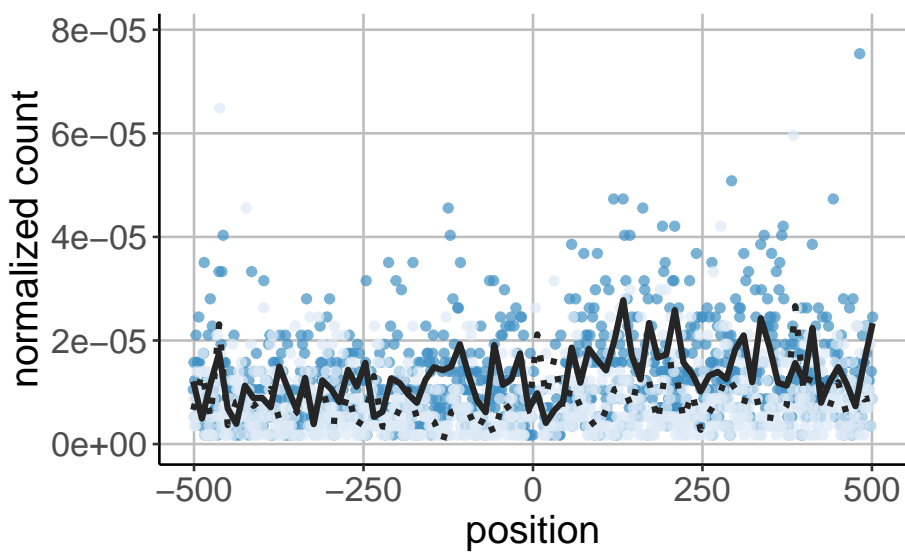

RBM46-GUGAUUG

•• antisense — sense    • antisense • sense

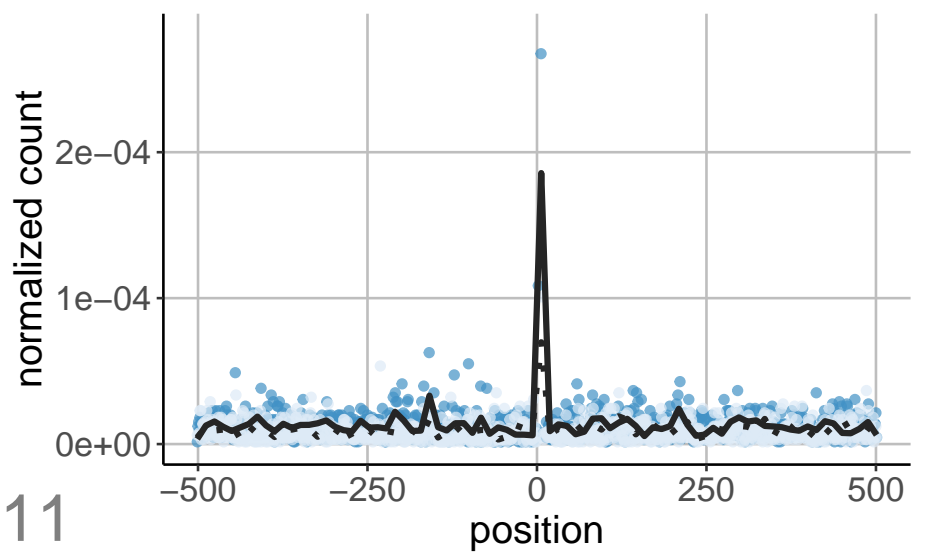

STOPcodon

ESRP1\_3-GGUGUGGUGU

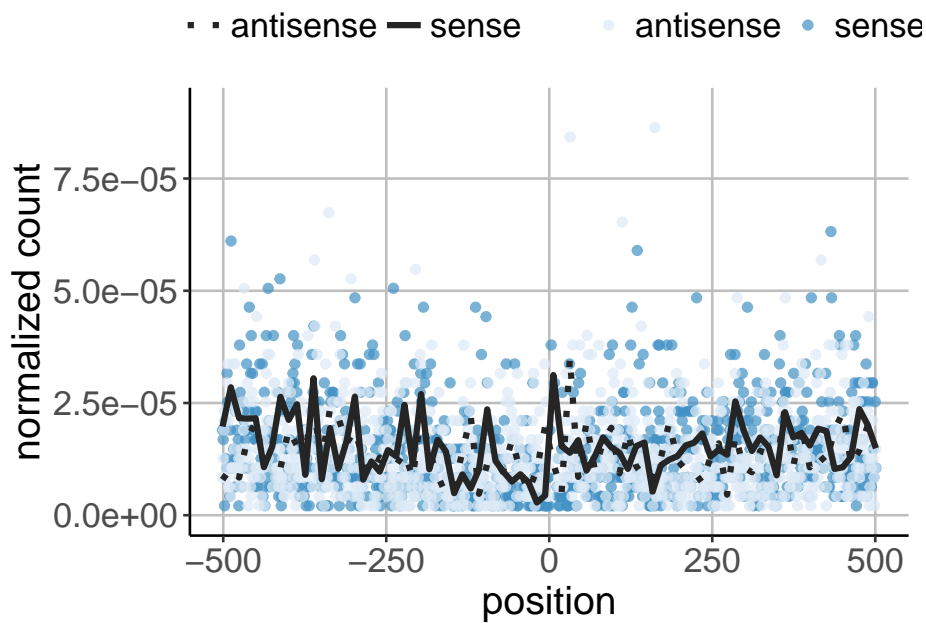

SNRPB2-GGGUGUGCAC

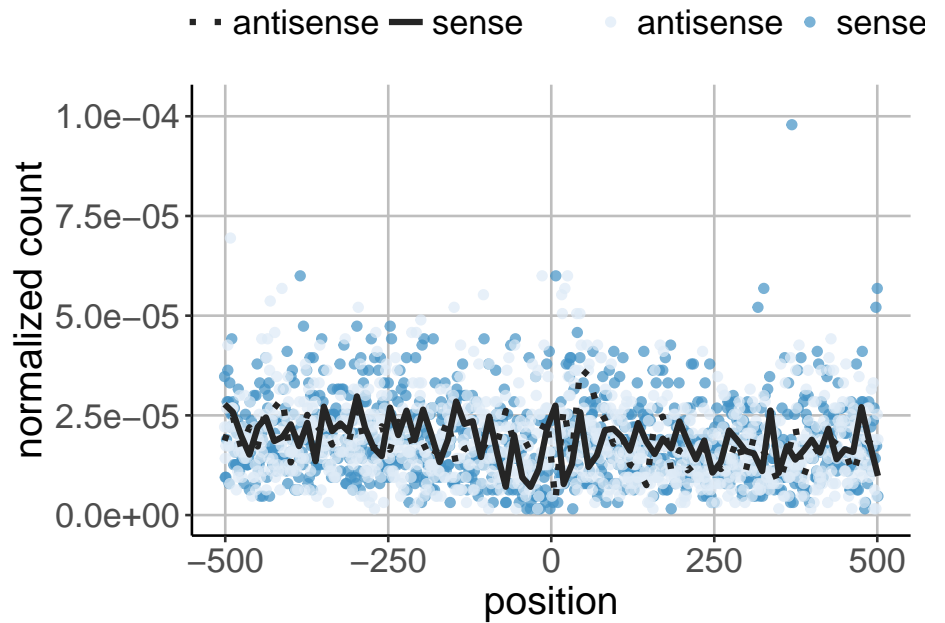

SNRPB2-NNCAUUGCACN

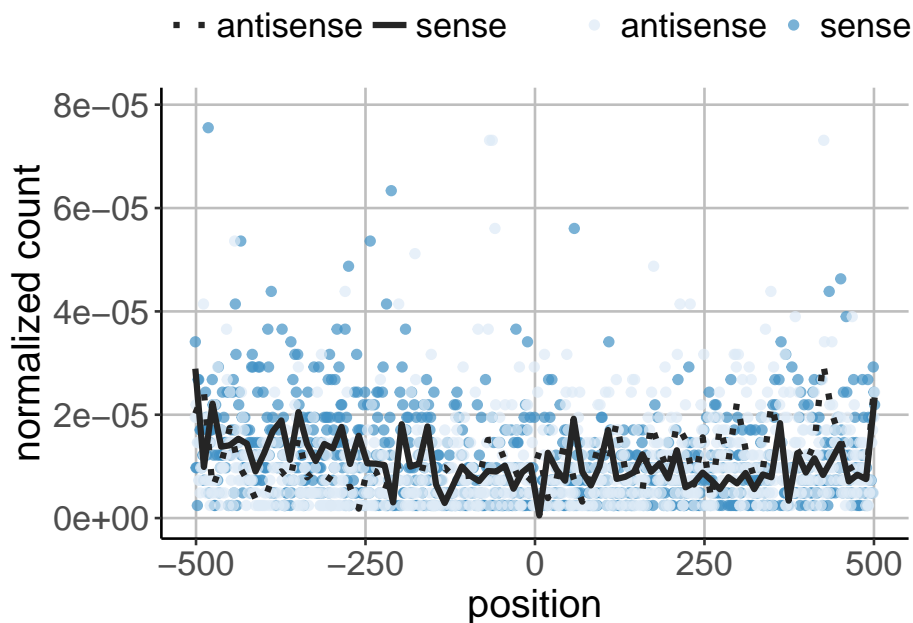

MEX3C-NNAGAGUUUAUNN

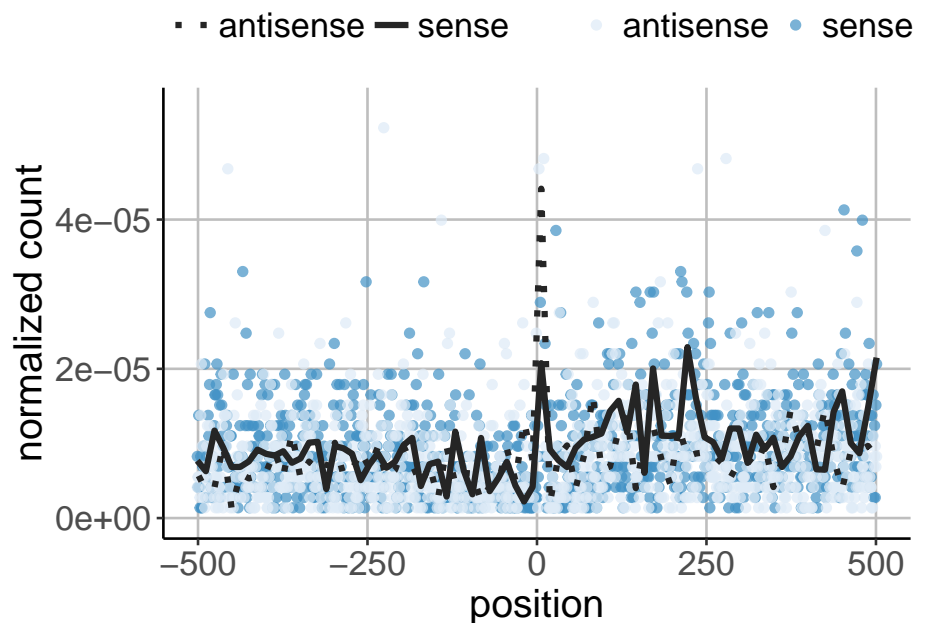

HNRNPA0-KUAGKUUAGGK

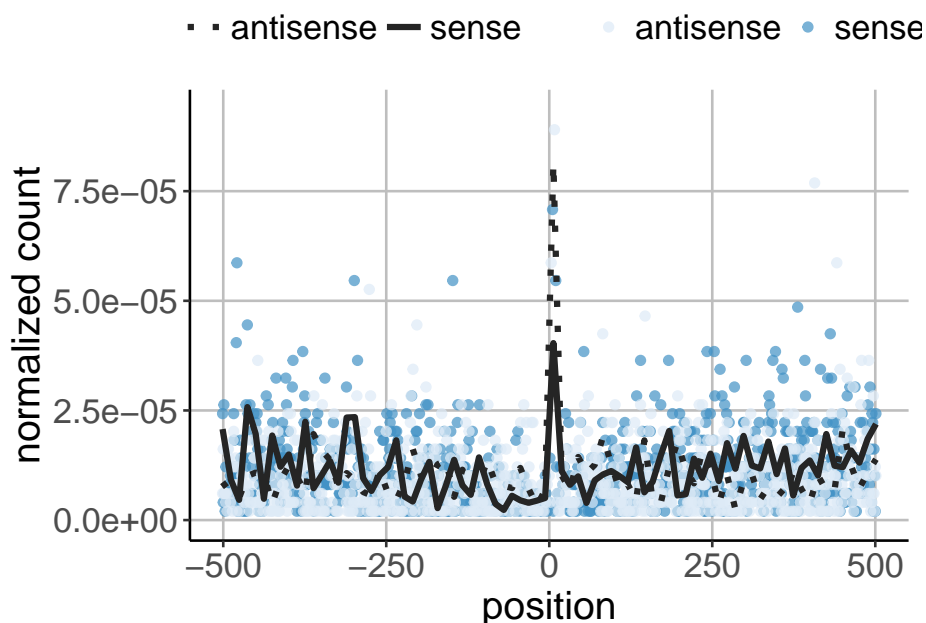

HNRNPA0-KUAGKUUUAGGK

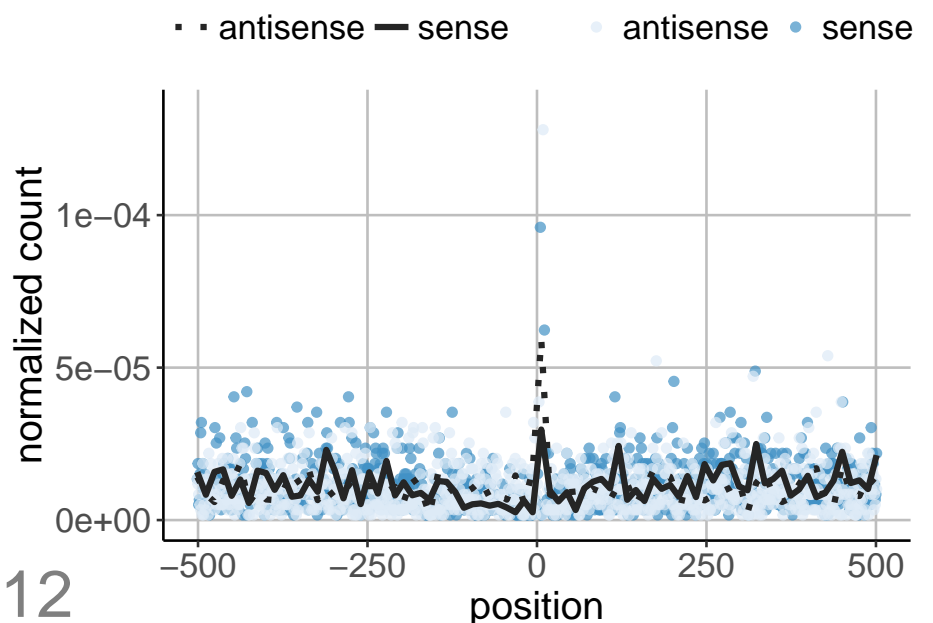

STOPcodon

SNRPA-CAUUGCACN

•• antisense — sense    • antisense • sense

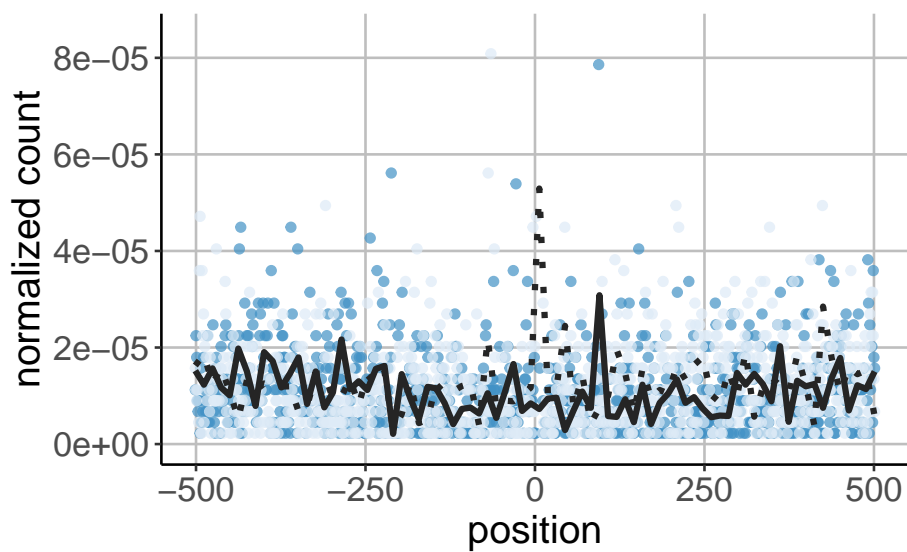

SNRPA-NUGCACR

•• antisense — sense    • antisense • sense

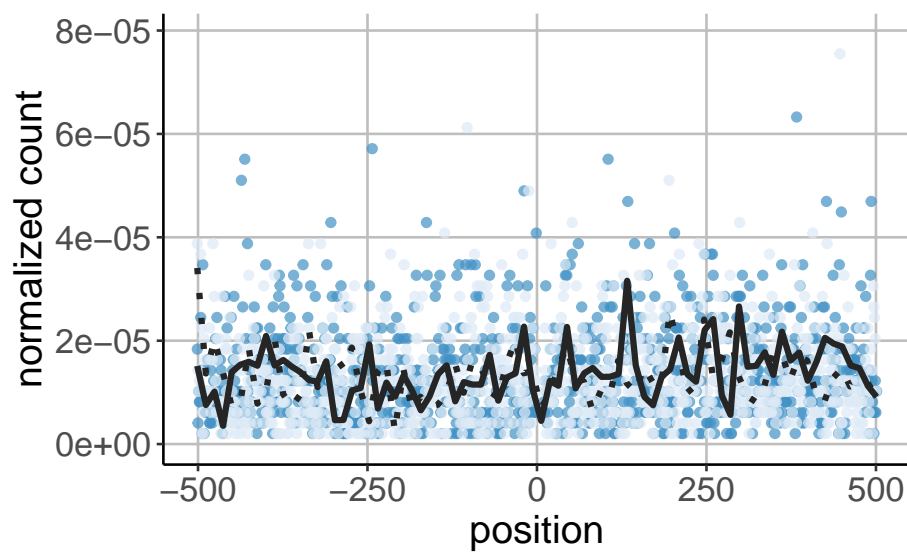

MEX3B\_3-UAGAGUUUAAU

•• antisense — sense    • antisense • sense

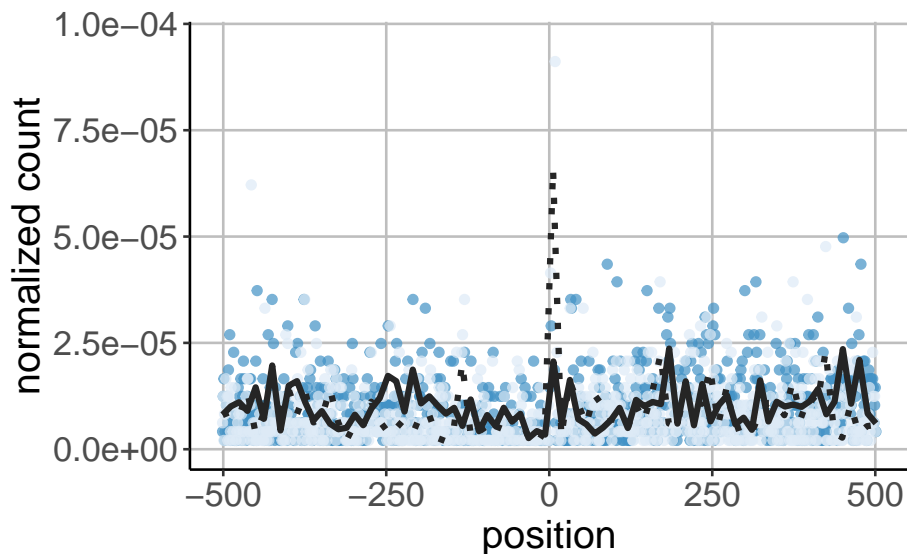

MEX3B\_3-UAUUUAAU

•• antisense — sense    • antisense • sense

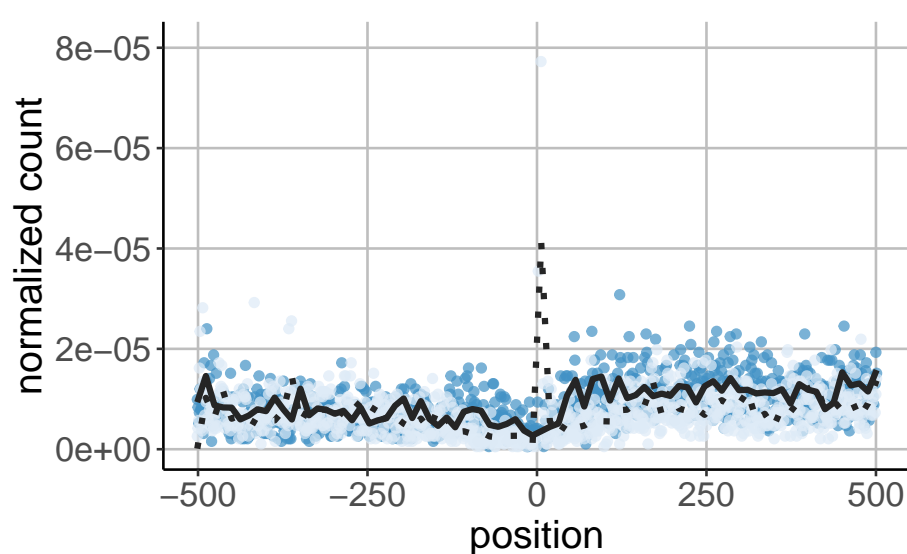

KHDRBS2-UAAACAAUAA

•• antisense — sense    • antisense • sense

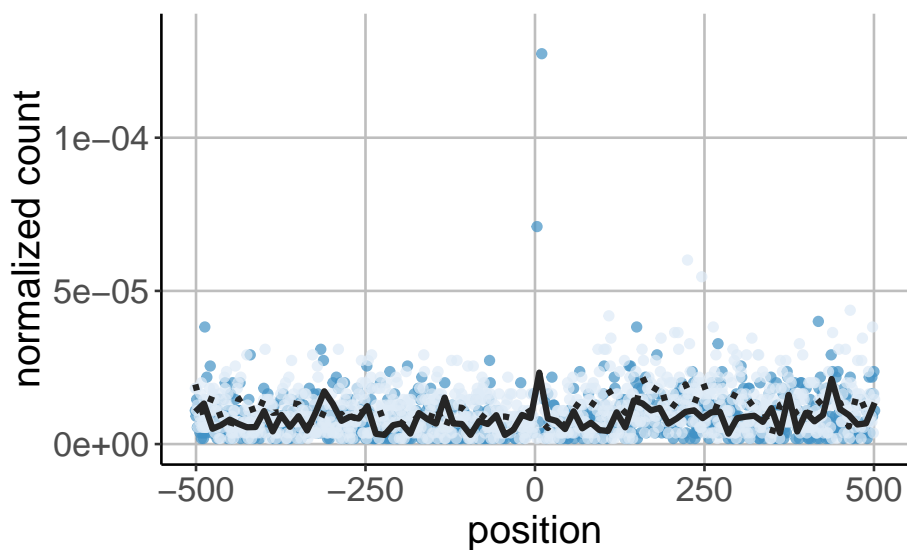

CELF3\_2-UGUGUNUGUGU

•• antisense — sense    • antisense • sense

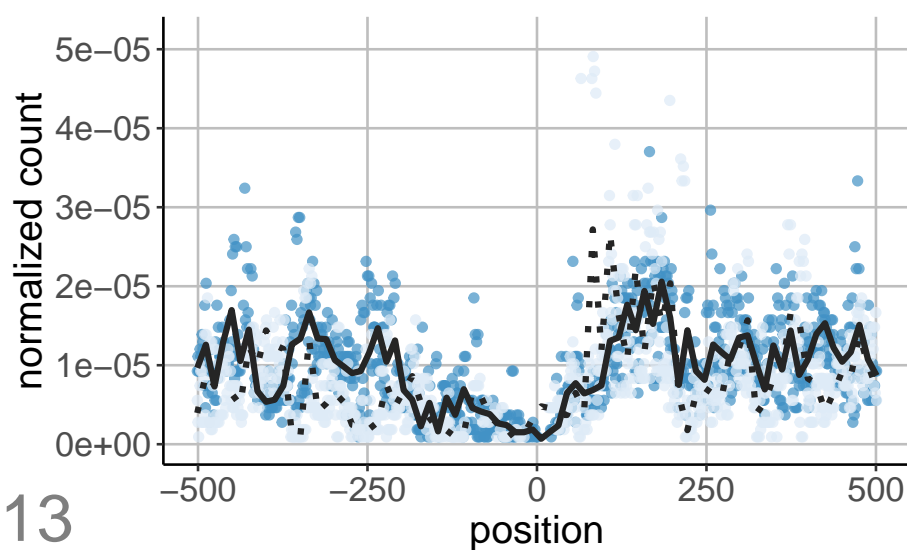

**STOPcodon**

RNPC3-GGGDDGGGDKUACKKGGK

•• antisense — sense    • antisense • sense

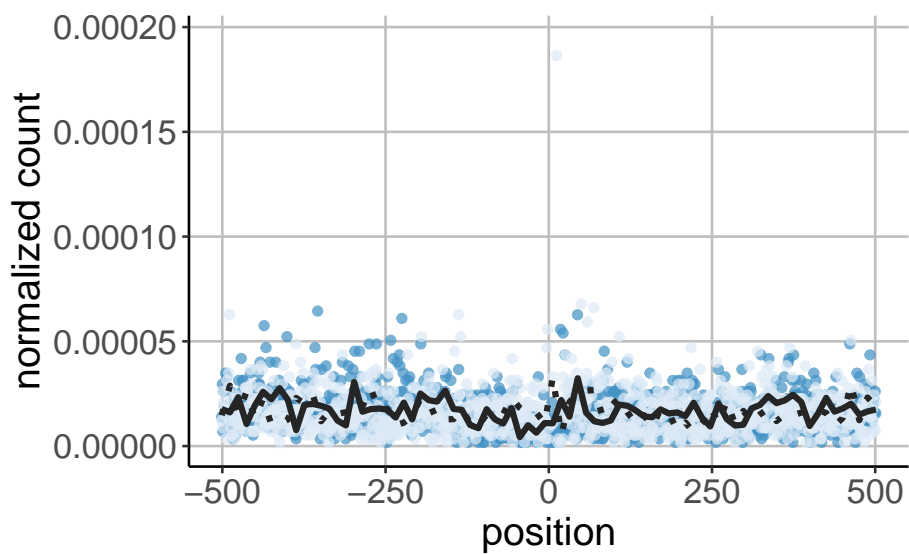

RBM14-UGCGUCG

•• antisense — sense    • antisense • sense

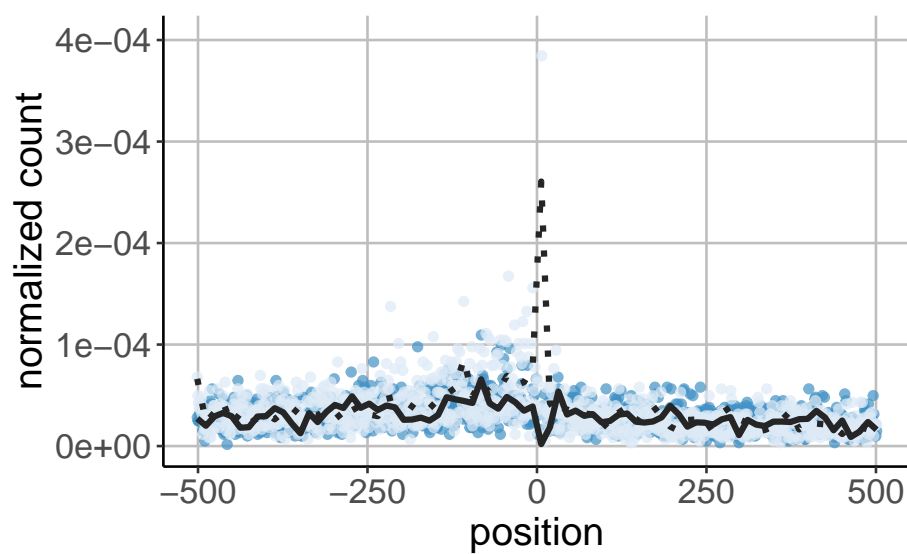

CELF4-UGUGUUGUGU

•• antisense — sense    • antisense • sense

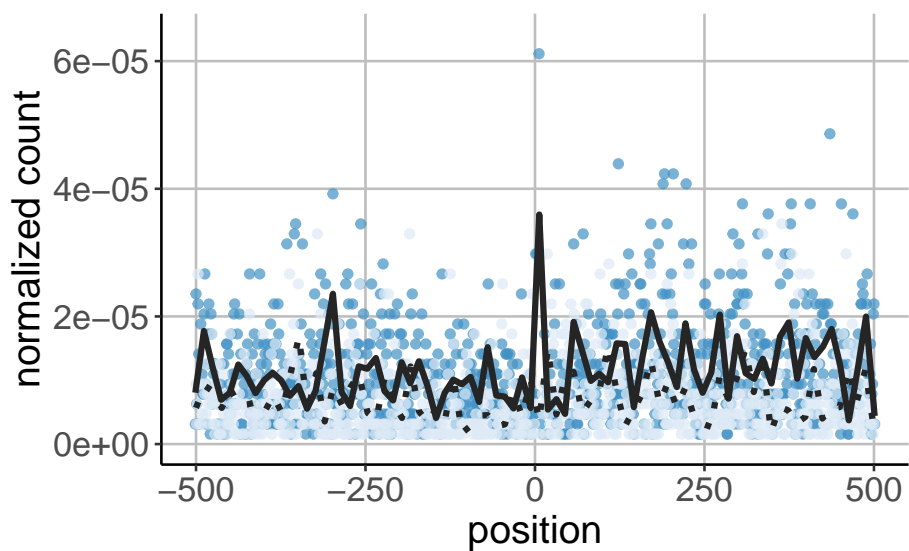

ZRANB2-NNNGGUAAGGUNN

•• antisense — sense    • antisense • sense

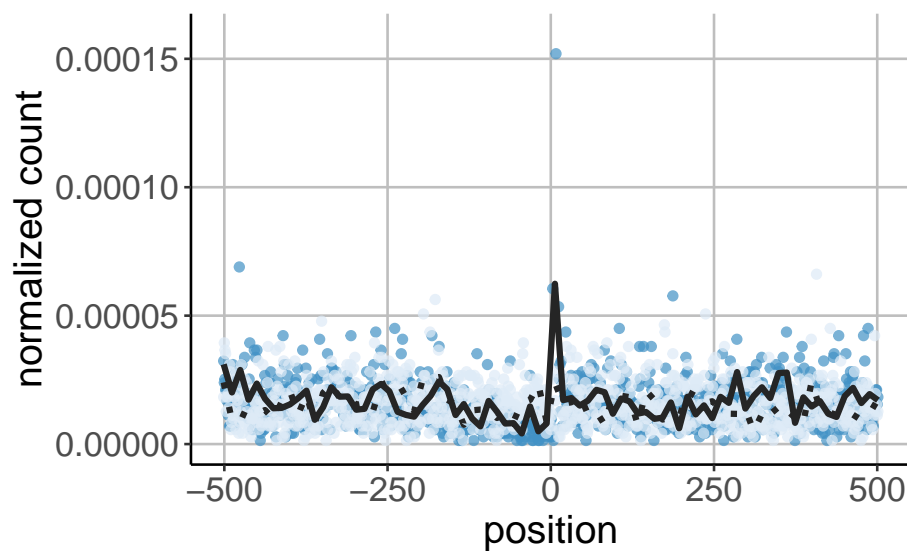

RBM4-CGGGGURUGN

•• antisense — sense    • antisense • sense

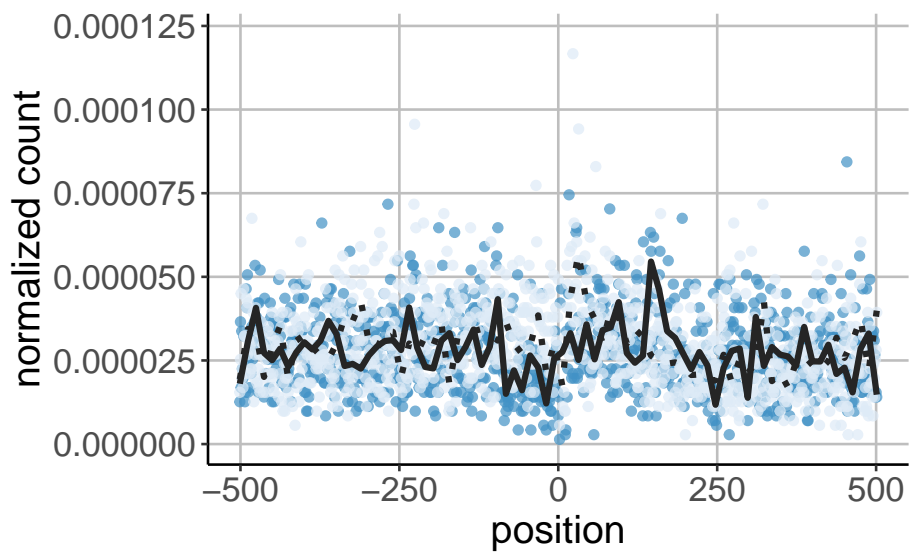

RBPM5-NAGGCACR

•• antisense — sense    • antisense • sense

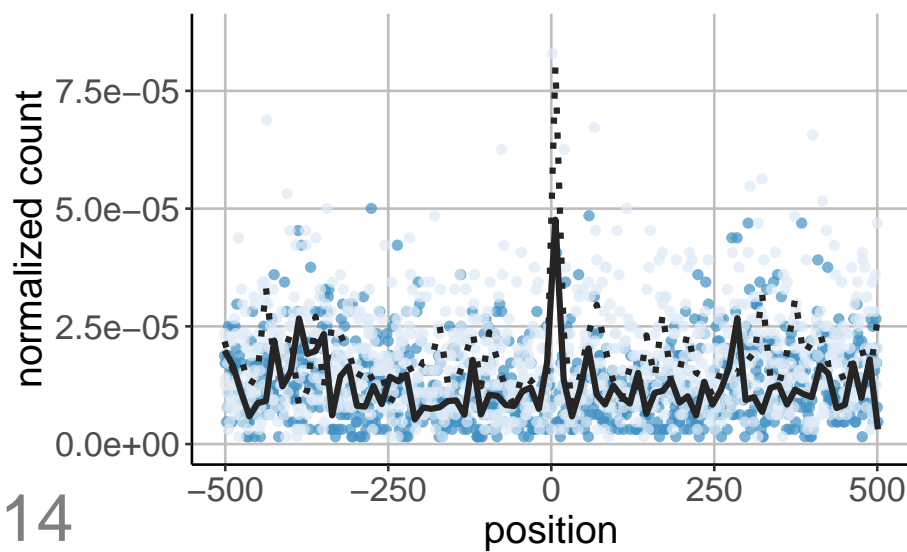

**STOPcodon**

RBPMS-UCACGNGCACN

• antisense — sense    • antisense • sense

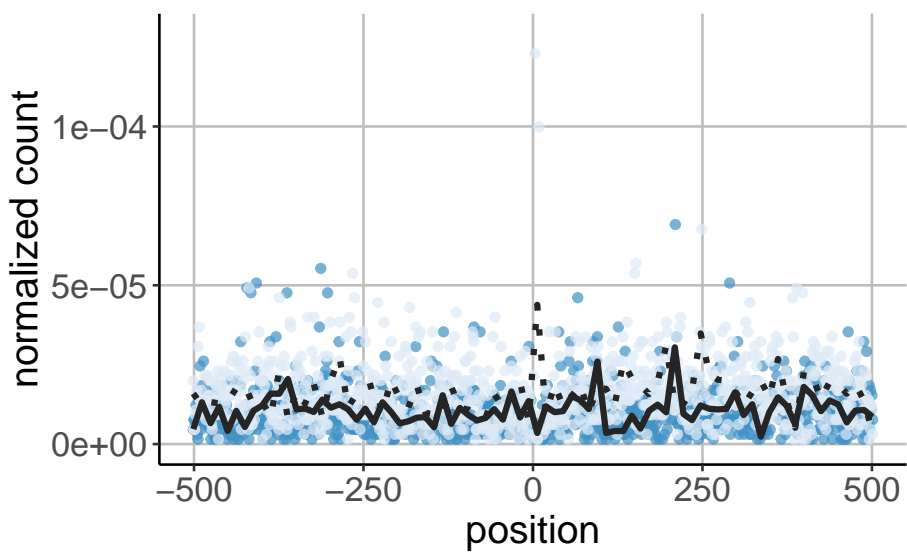

CELF1\_2-UGUGUNUGUGU

• antisense • sense

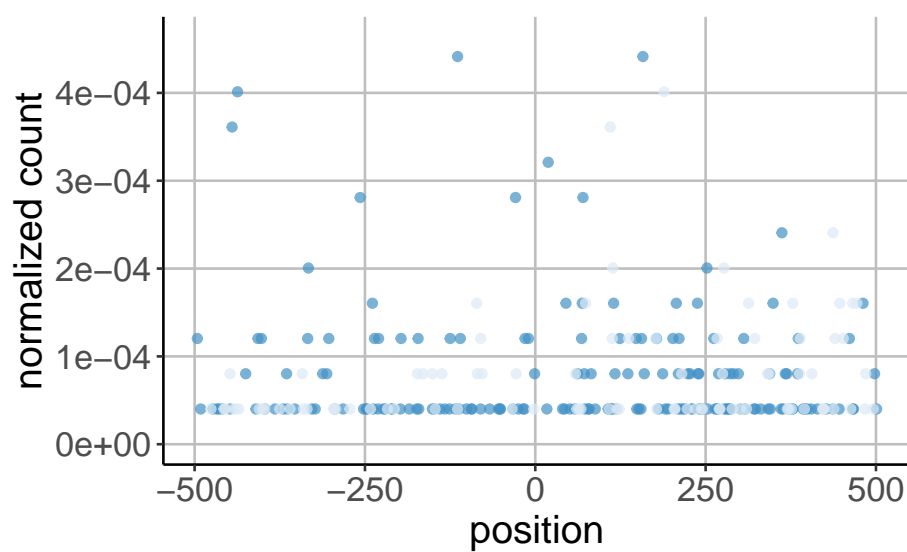

CSTF2-RRGGCGUAGCGUNN

• antisense — sense    • antisense • sense

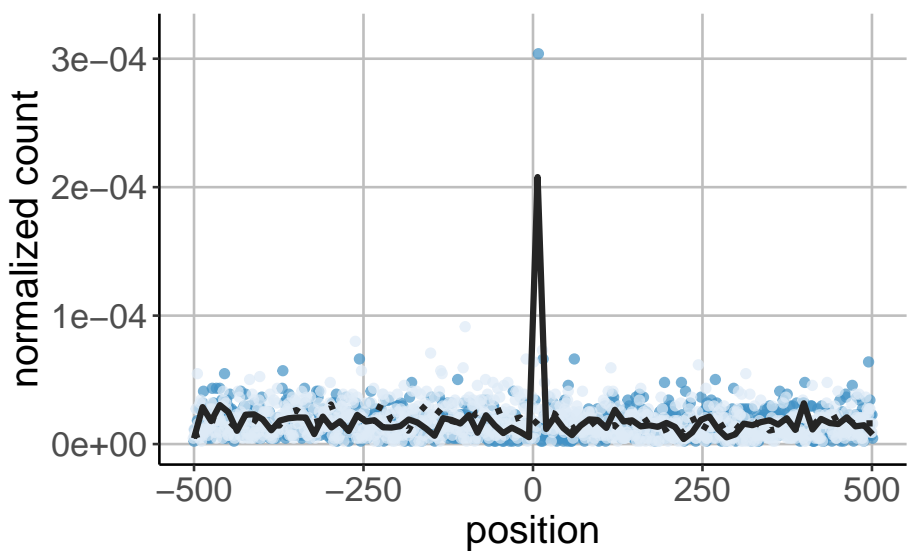

RBM28-GRGGCCGNGCGGUGG

• antisense — sense    • antisense • sense

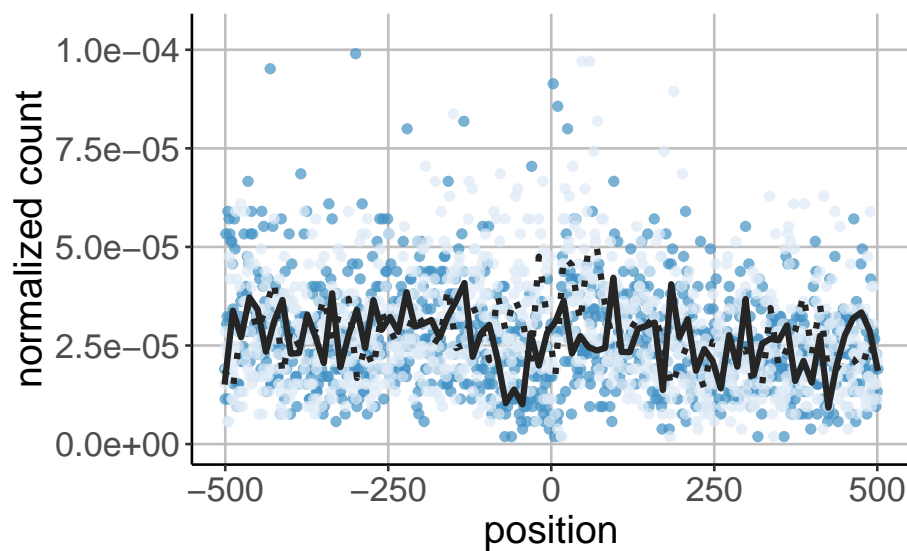

RBM28-GUGGGUCUCGG

• antisense — sense    • antisense • sense

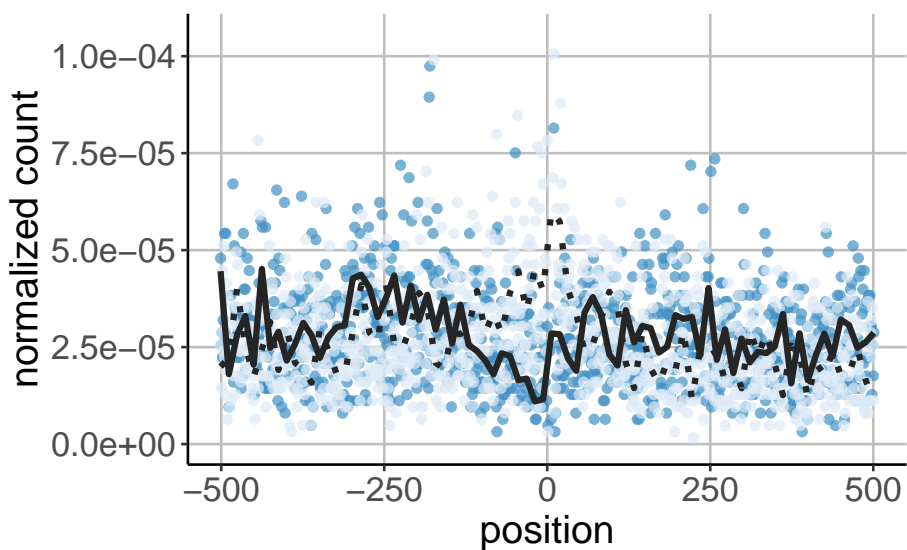

ZC3H10-GCGCAUGCGNN

• antisense — sense    • antisense • sense

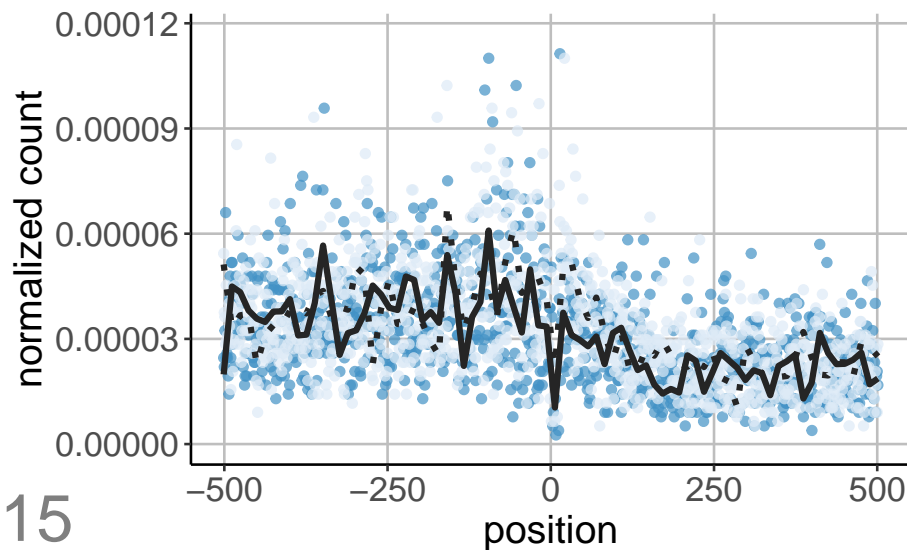



**STOPcodon**

ZC3H10-NGCGCAGCGUN

•• antisense — sense    • antisense • sense

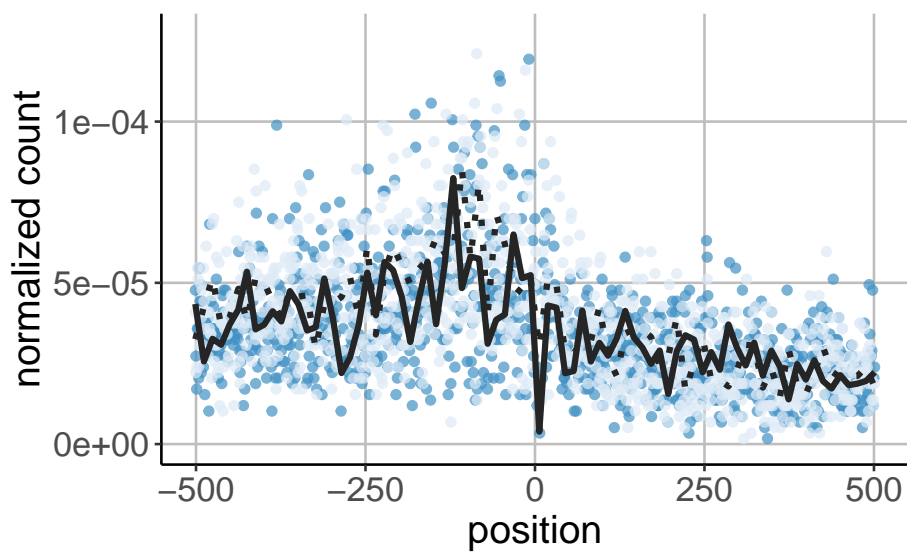

RBFOX1\_2-GCAUGNNGCAUG

•• antisense — sense    • antisense • sense

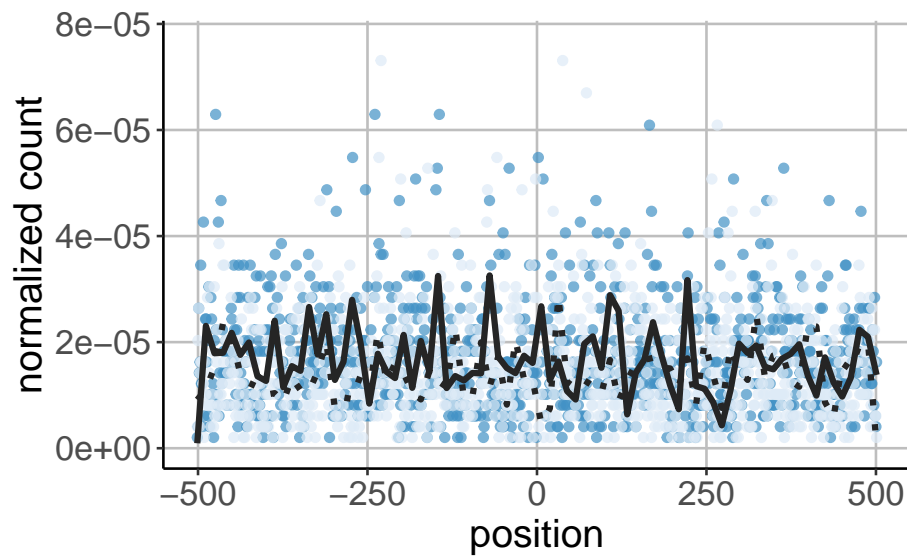

MSI1-KUAGUWKUAGK

•• antisense — sense    • antisense • sense

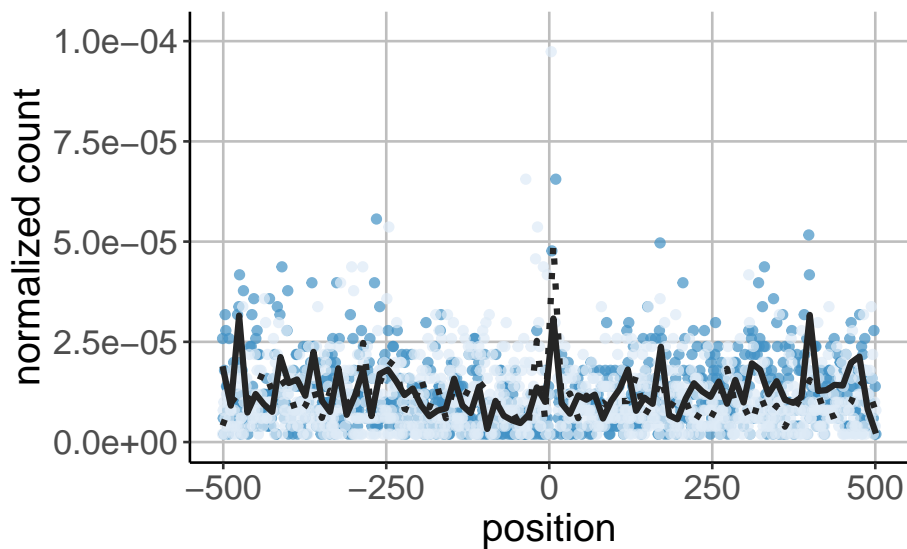

HEXIM1-GKDKCGACGGK

•• antisense — sense    • antisense • sense

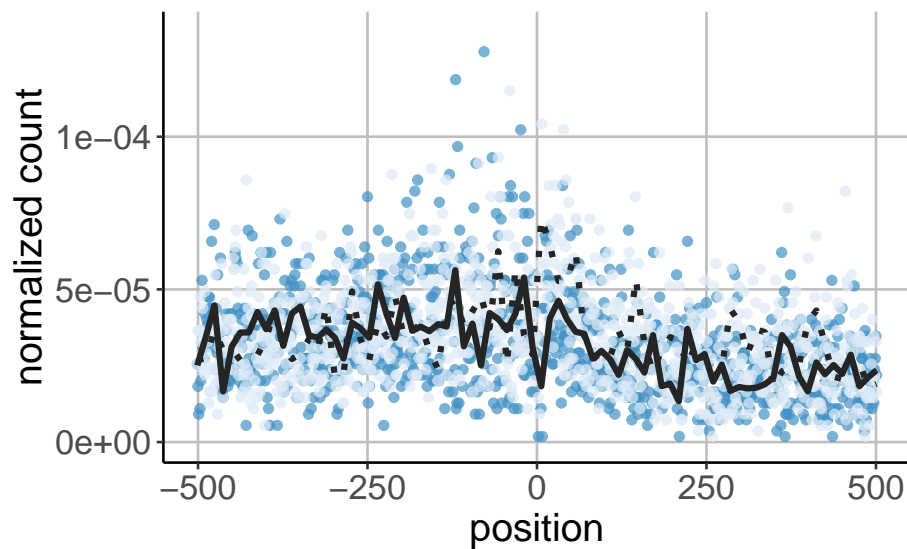

SART3-NGUUAGCRK

•• antisense — sense    • antisense • sense

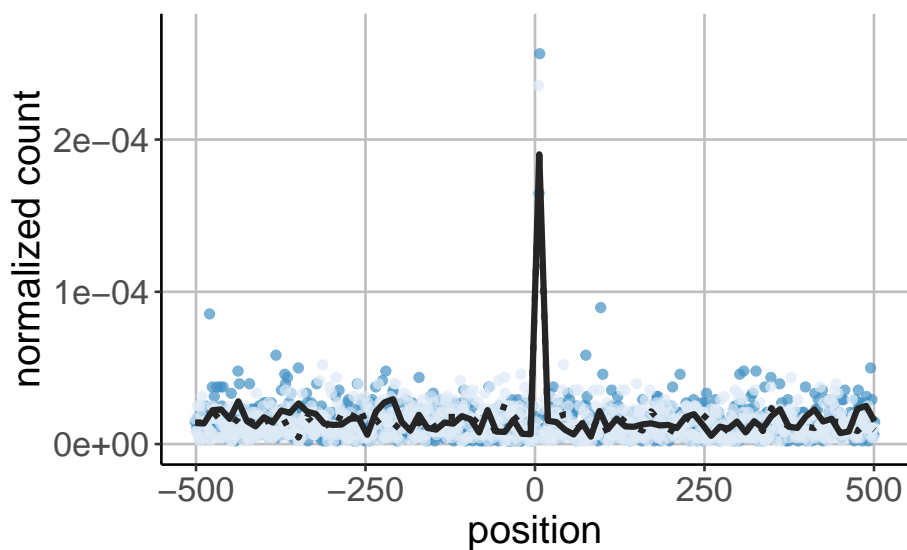

MSI2-GUAGUGDGUAGK

•• antisense — sense    • antisense • sense

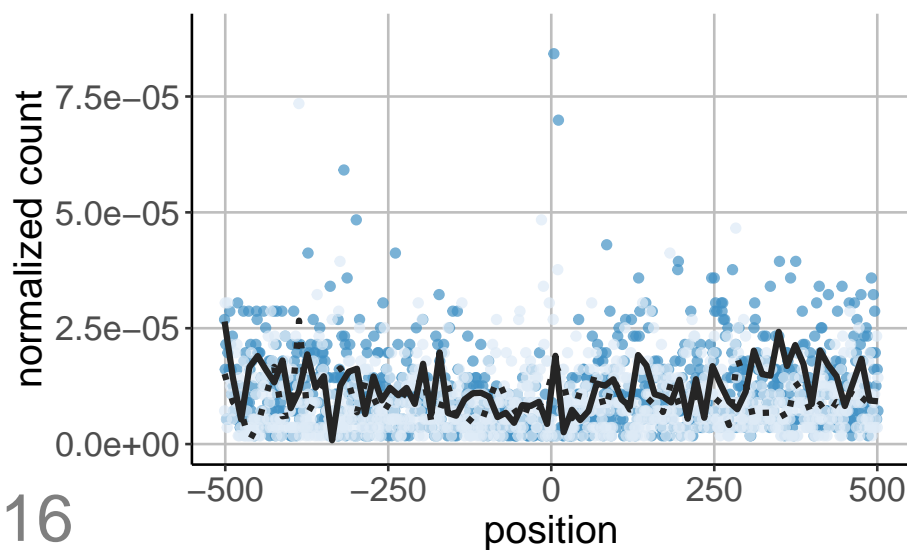

16

STOPcodon

MSI2-GUAGUNNNGUAGK

• antisense — sense    • antisense • sense

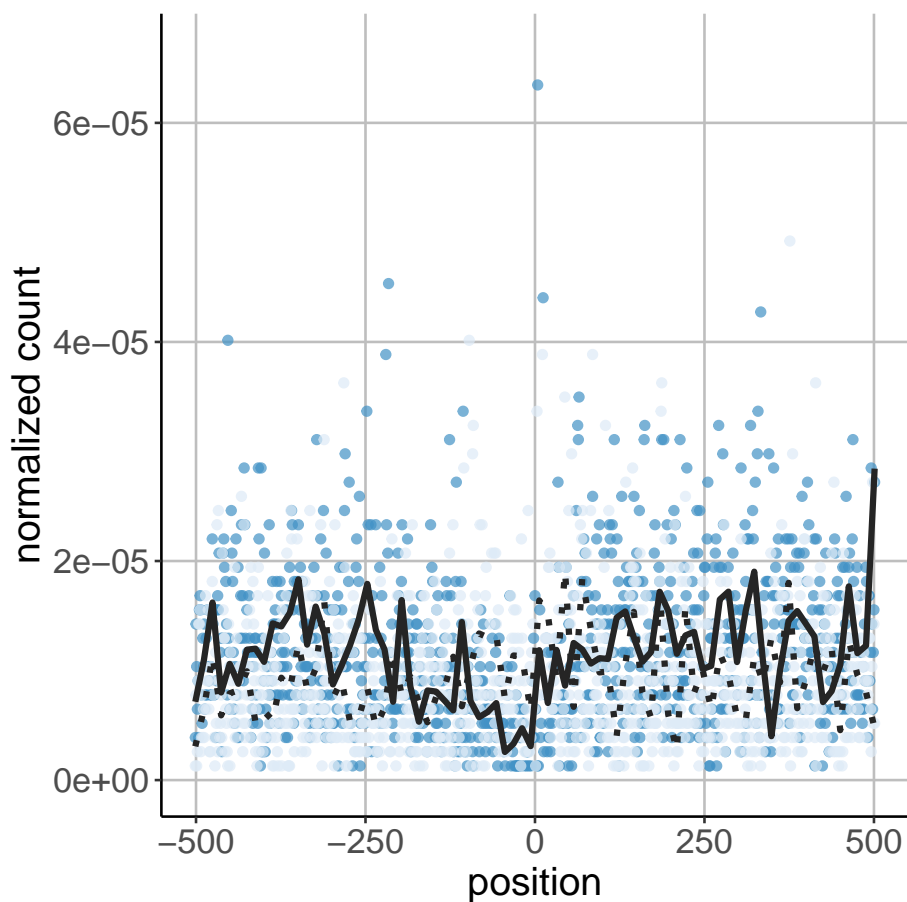

ZCRB1-GNNUUAACK

• antisense — sense    • antisense • sense

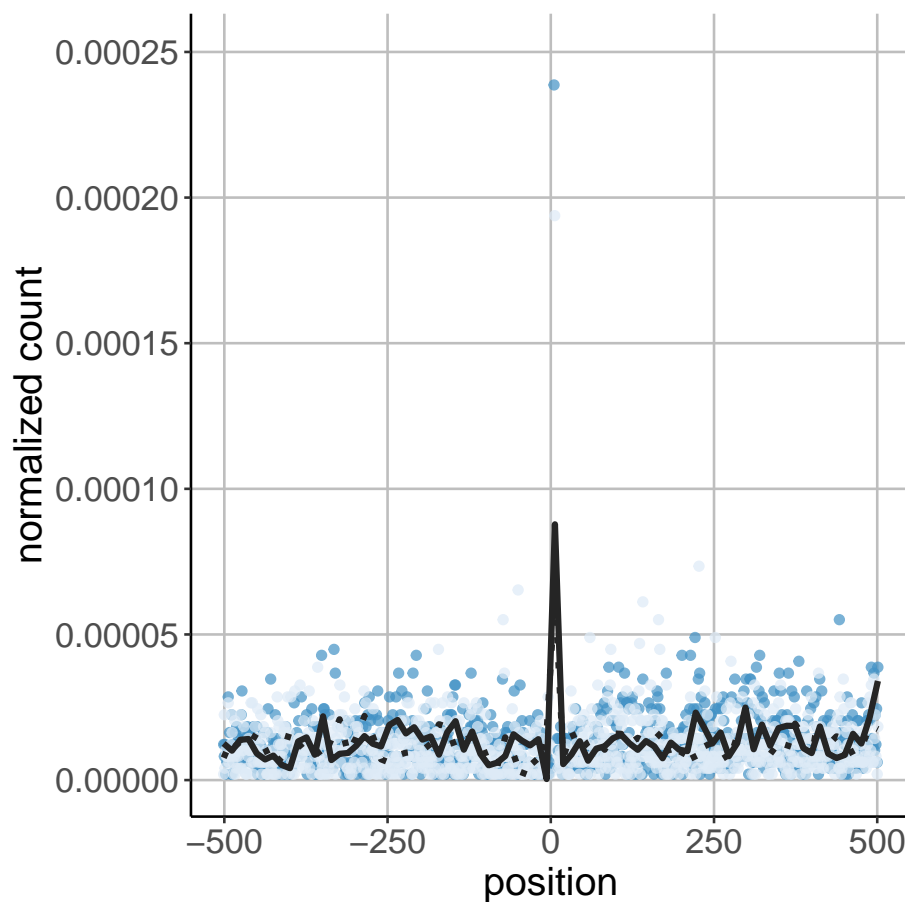

ZCRB1-GUGGACUUA

• antisense — sense    • antisense • sense

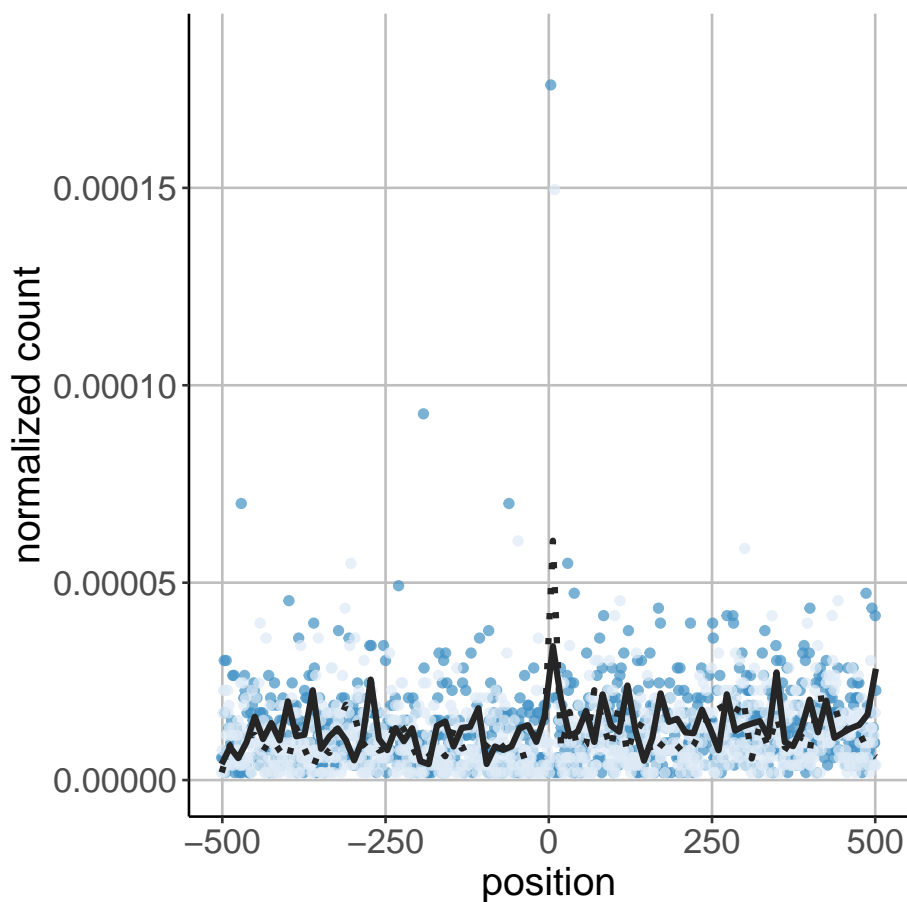

LARP6-GUGUCNNNNNNNNGAAGUCN

• antisense — sense    • antisense • sense

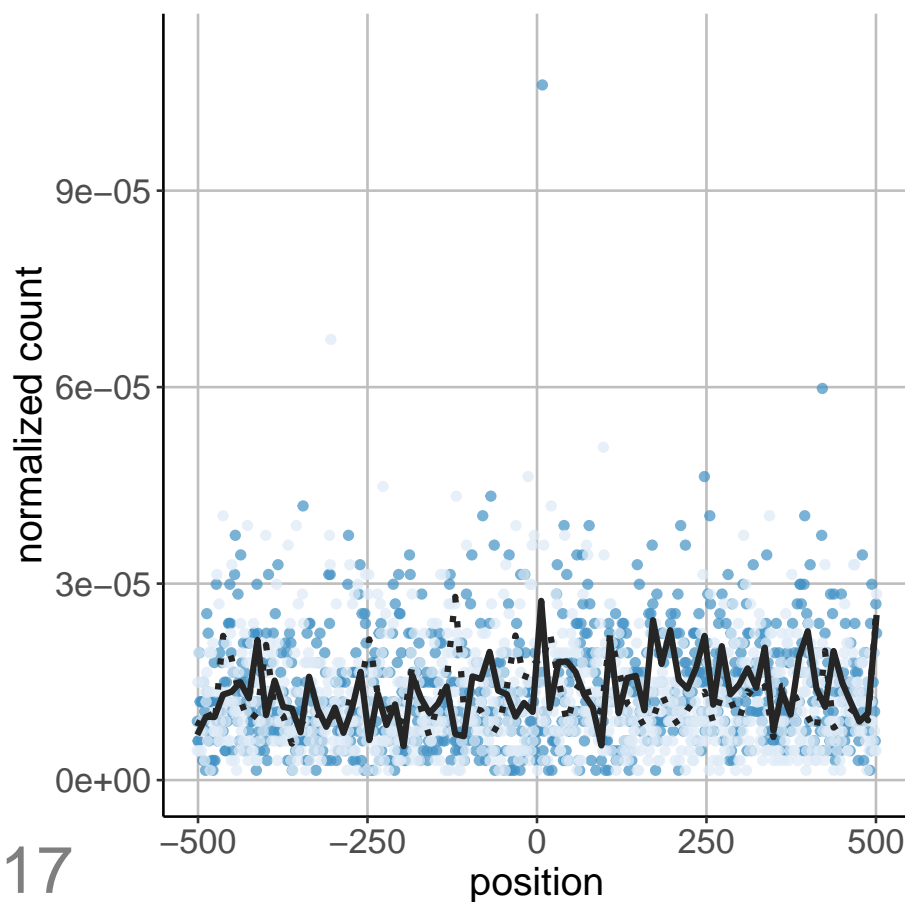

**STOPcodon**

DAZ1\_2-NNUGUGUGSGUUUCCGSN

•• antisense — sense    • antisense • sense

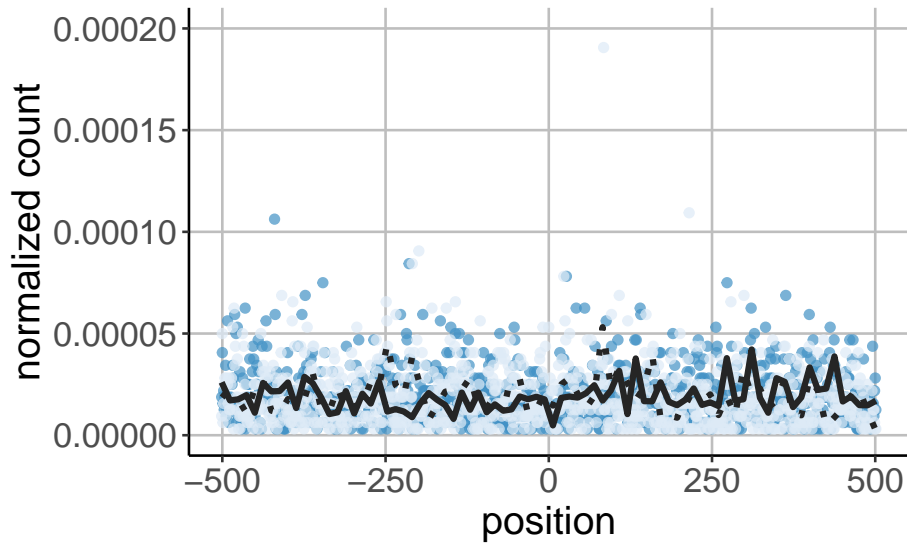

DAZ1\_2-NUGKUGUUGUAGN

•• antisense — sense    • antisense • sense

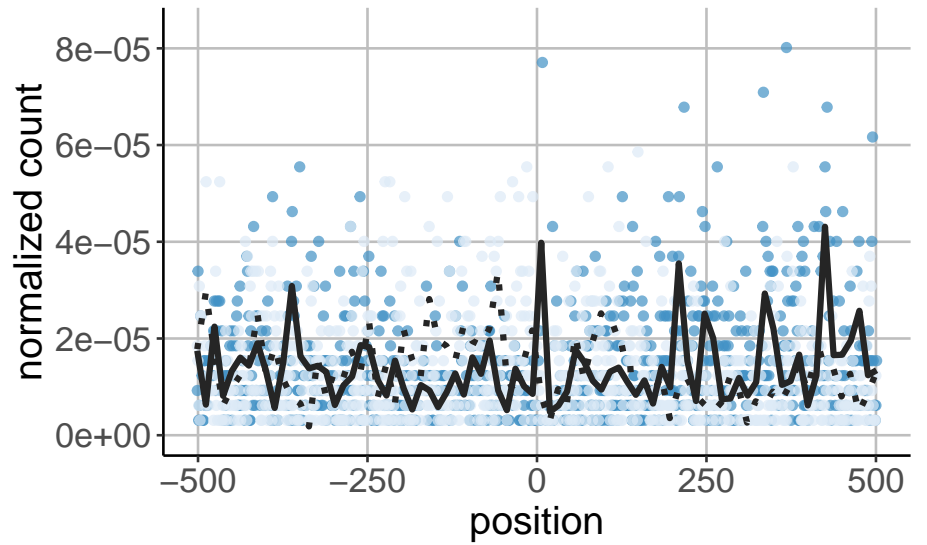

DAZ1\_2-CRNAAUGUUAGUAGN

•• antisense — sense    • antisense • sense

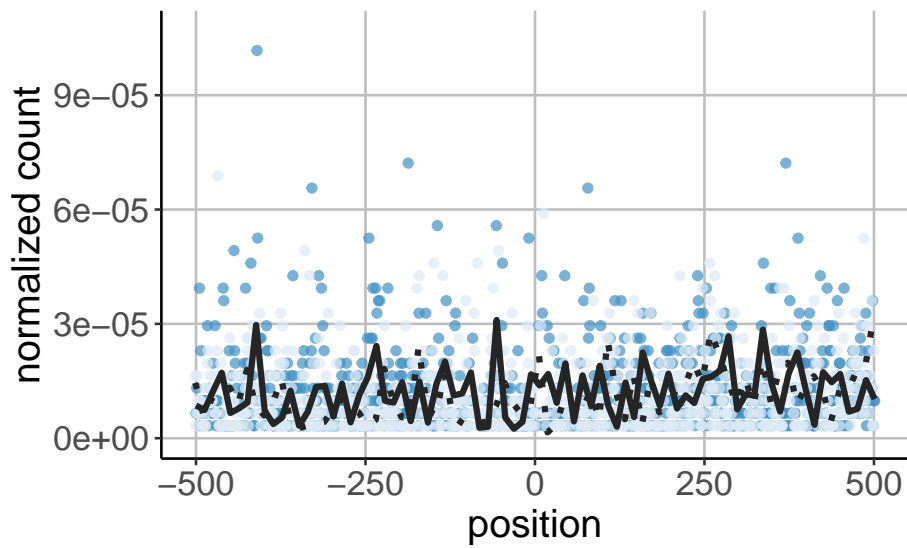

DAZ3-NNUGUGUGSGUUUCCGSN

•• antisense — sense    • antisense • sense

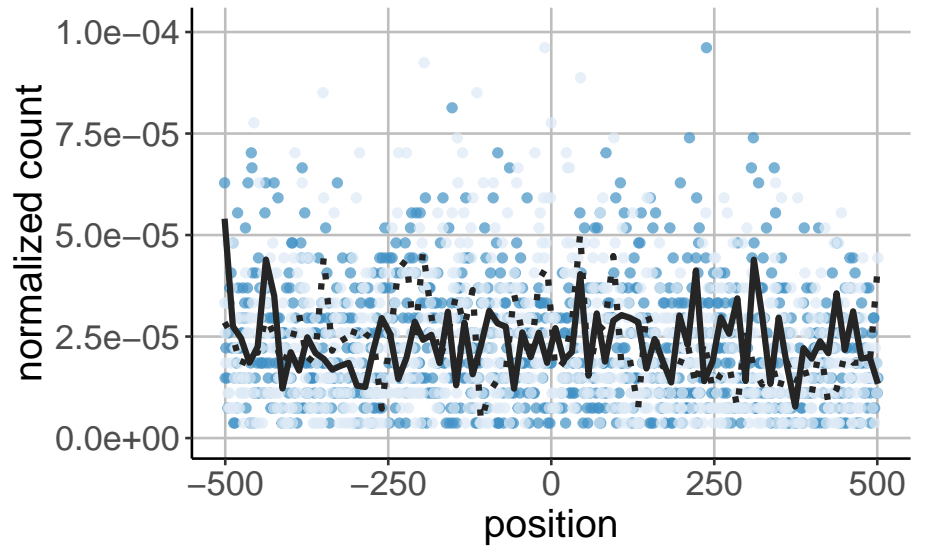

DAZ4-NNUGUGUGSGUUUCCGSN

•• antisense — sense    • antisense • sense

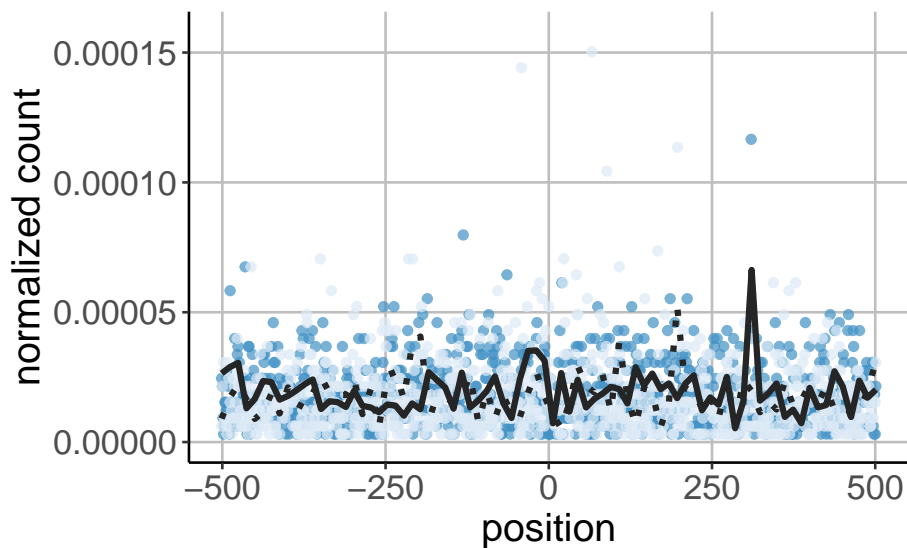

DAZ4-CUGKUGUUGUAGG

•• antisense — sense    • antisense • sense

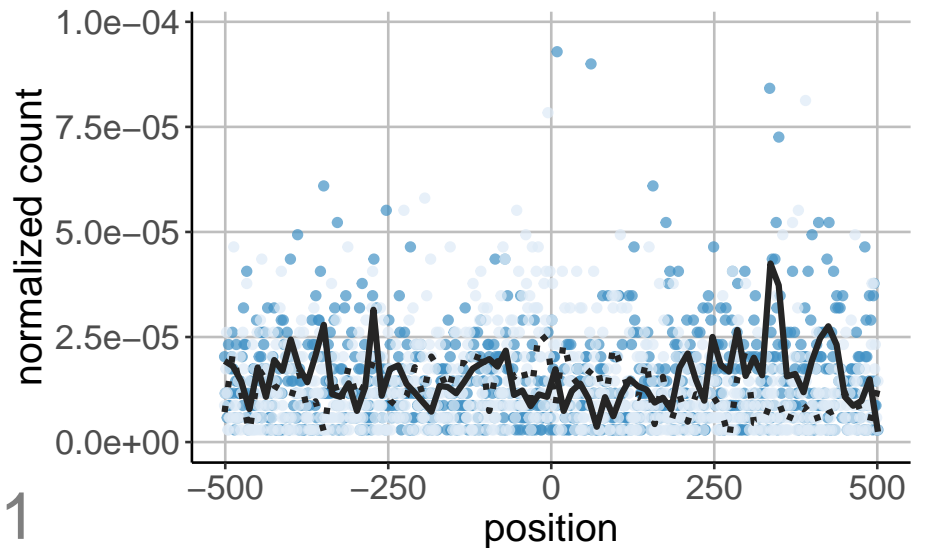

**STOPcodon**

DAZL-NNUGYGUGCGUUUCCGSN

• antisense — sense    • antisense • sense

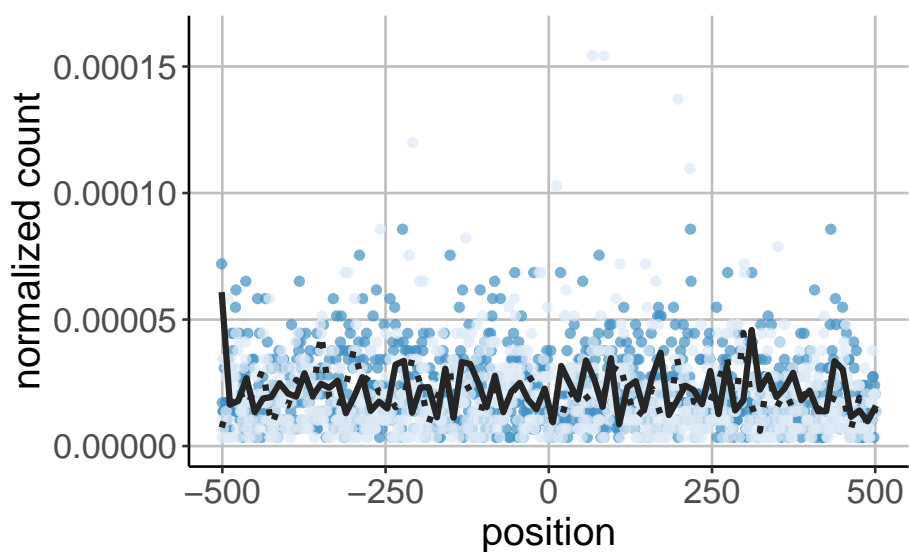

HNRNPA1-NGCAGUUUUAGGGCN

• antisense — sense    • antisense • sense

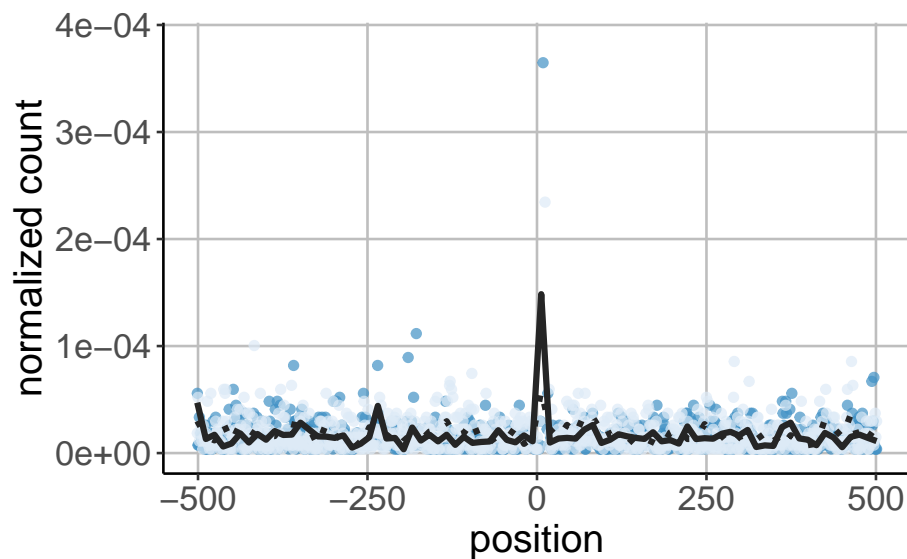

HNRNPC-NGGGUCUNAUUUUUUAAN

• antisense — sense    • antisense • sense

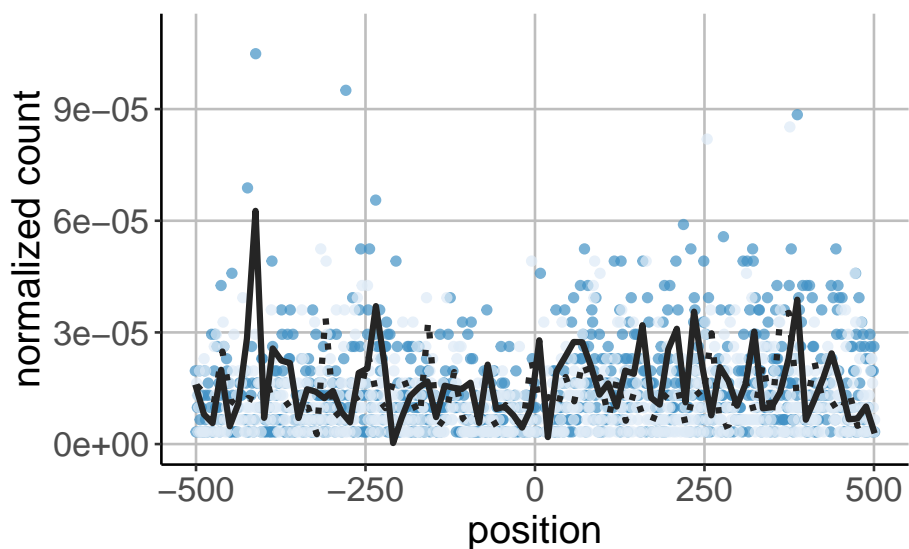

HNRNPCL1-NGGGUCUNAUUUUUUAAN

• antisense — sense    • antisense • sense

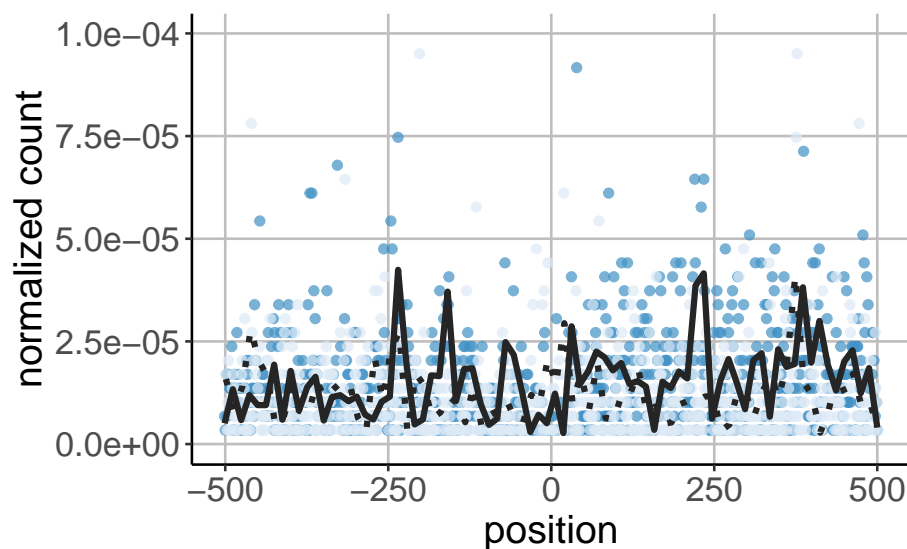

MKRN1-NYGUAAAKUGUAGN

• antisense — sense    • antisense • sense

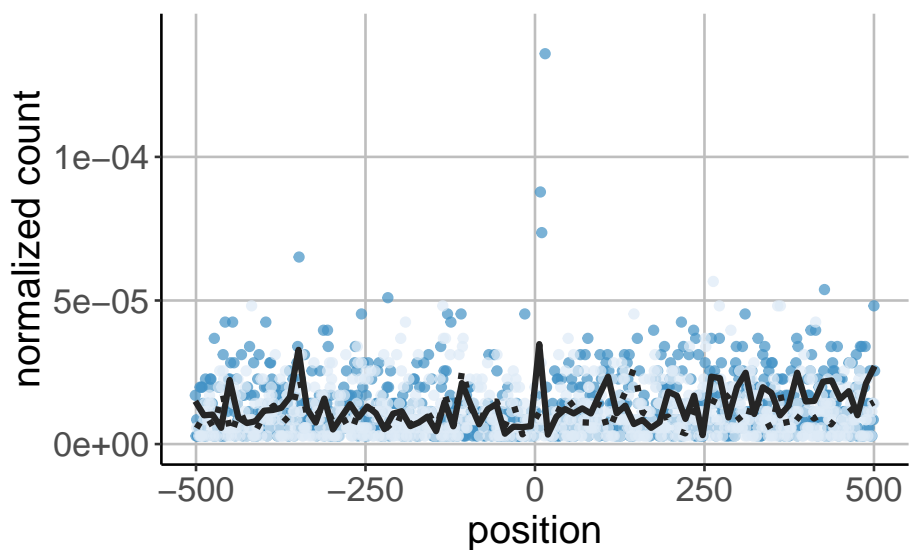

RALY-GGGUCUWUUUUUAA

• antisense — sense    • antisense • sense

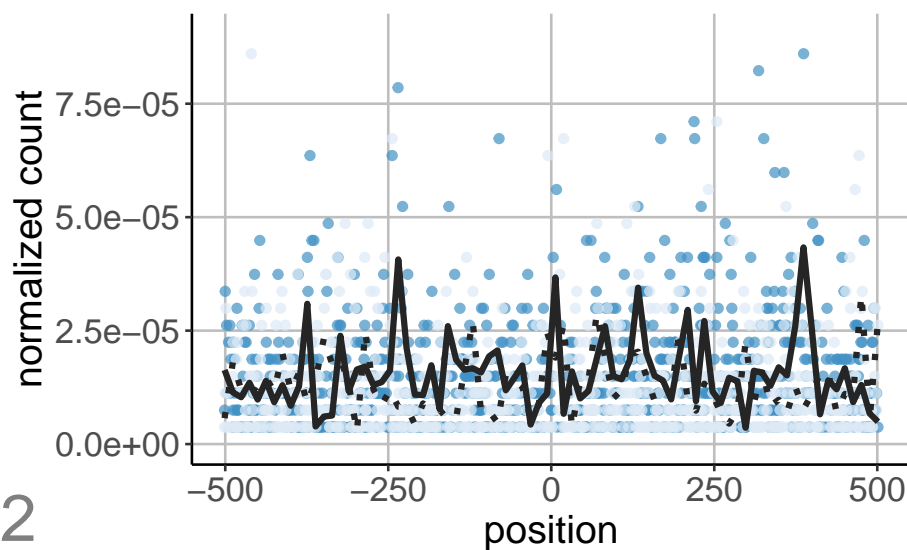

2

**STOPcodon**

**RBFOX1\_4–GKUGCAUGUG**

•• antisense — sense    • antisense • sense

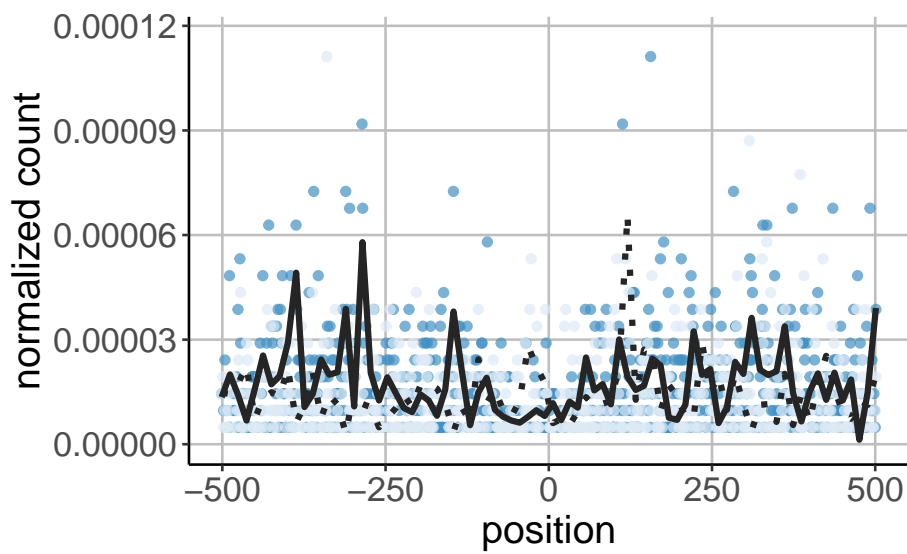

**RBFOX3–GUWGCAUGUG**

•• antisense — sense    • antisense • sense

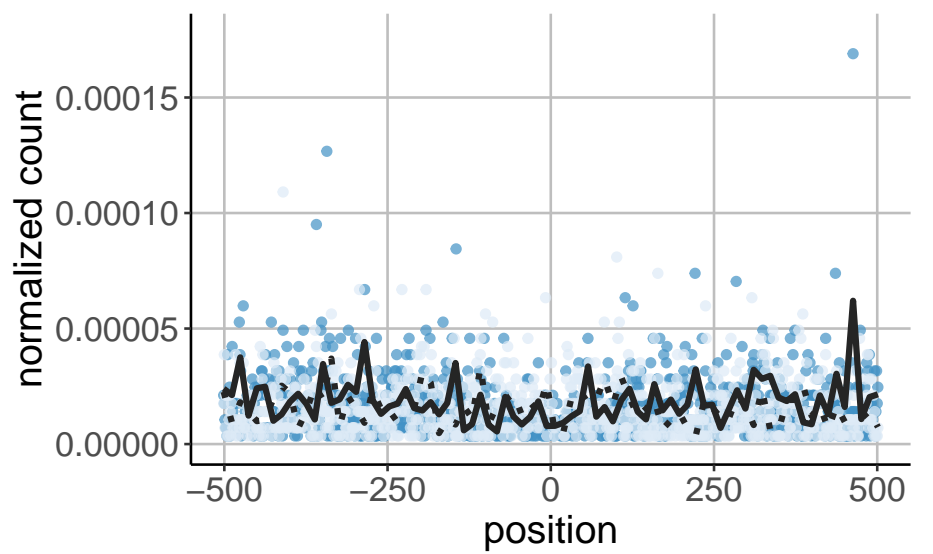

**RBM4–KGUUGCGCGGG**

•• antisense — sense    • antisense • sense

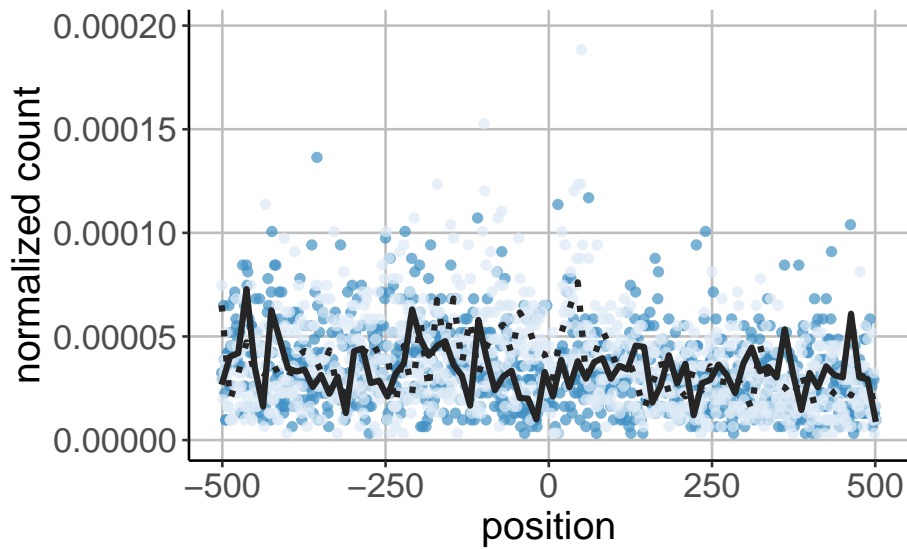

**RBM4–UGAGUGCGGUAG**

•• antisense — sense    • antisense • sense

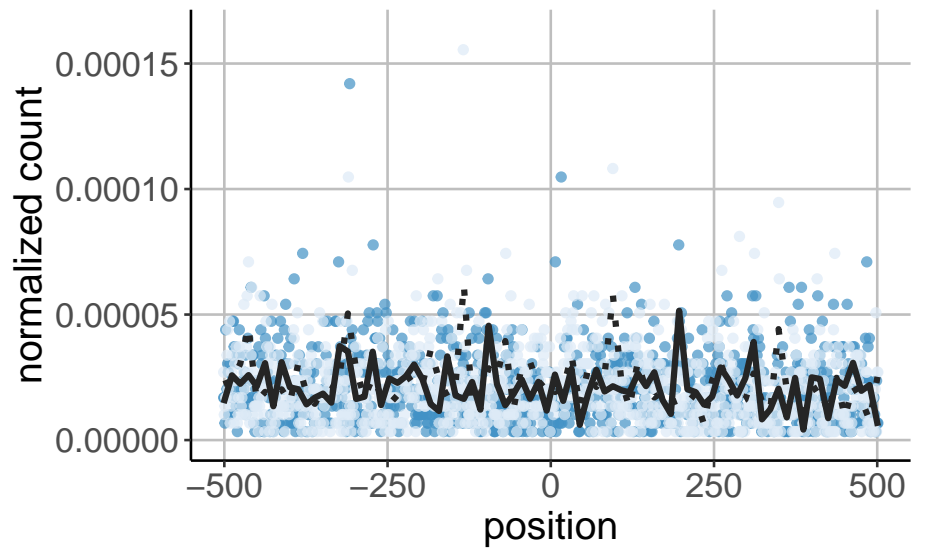

**RBM4B–KGUUGCGCGGG**

•• antisense — sense    • antisense • sense

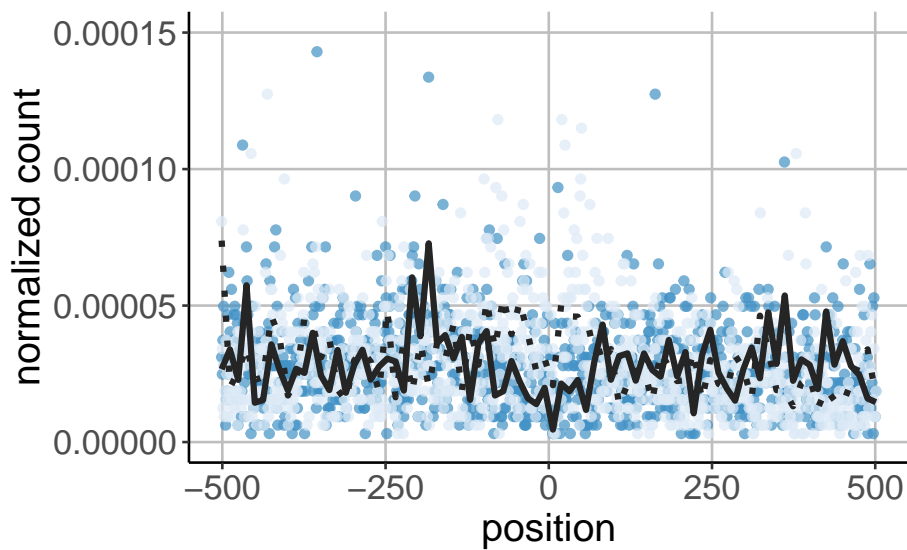

**RBM4B–UGAGUGCGGUAG**

•• antisense — sense    • antisense • sense

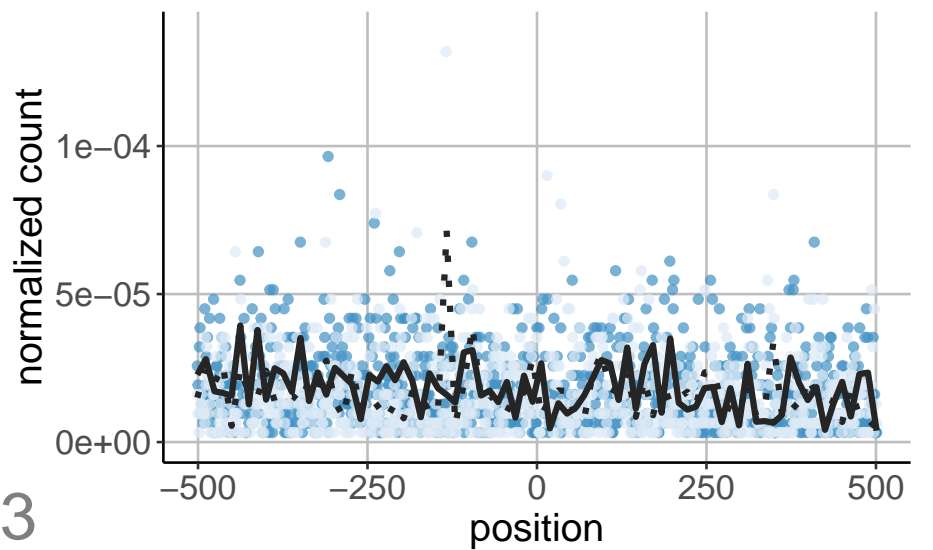

**3**

**STOPcodon**

RBM6–YRCGCUCCUNGCY

•• antisense — sense    • antisense • sense

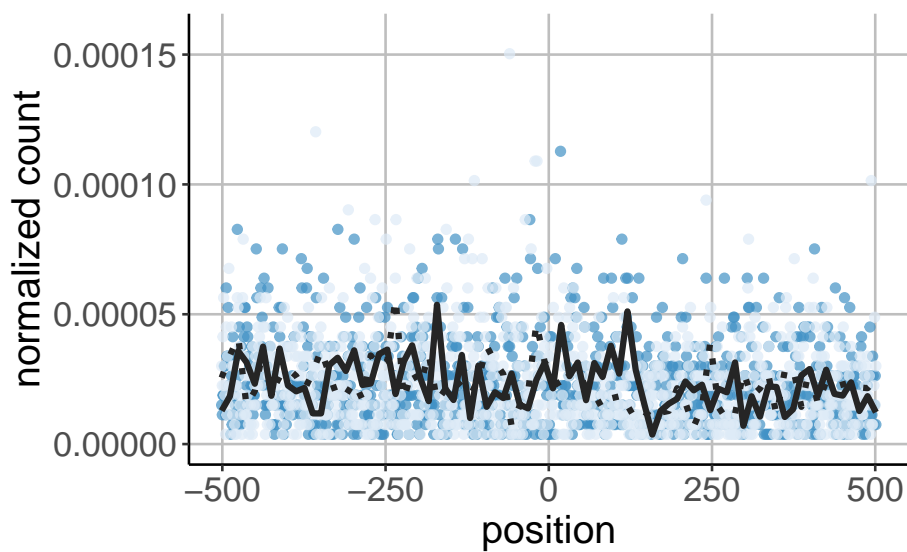

RBM6–YRYGCUCGUGGCYN

•• antisense — sense    • antisense • sense

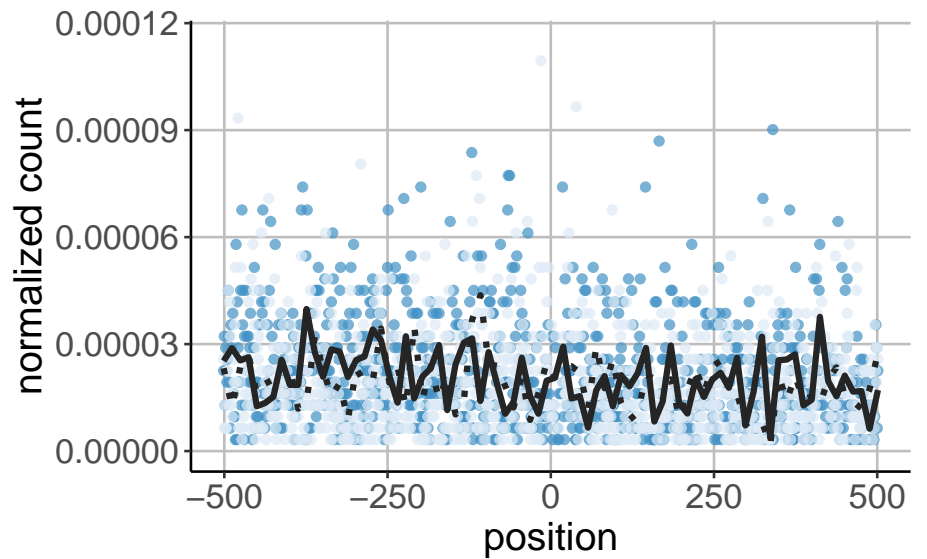

RBMS1–SGUGCAUAAKGCN

•• antisense — sense    • antisense • sense

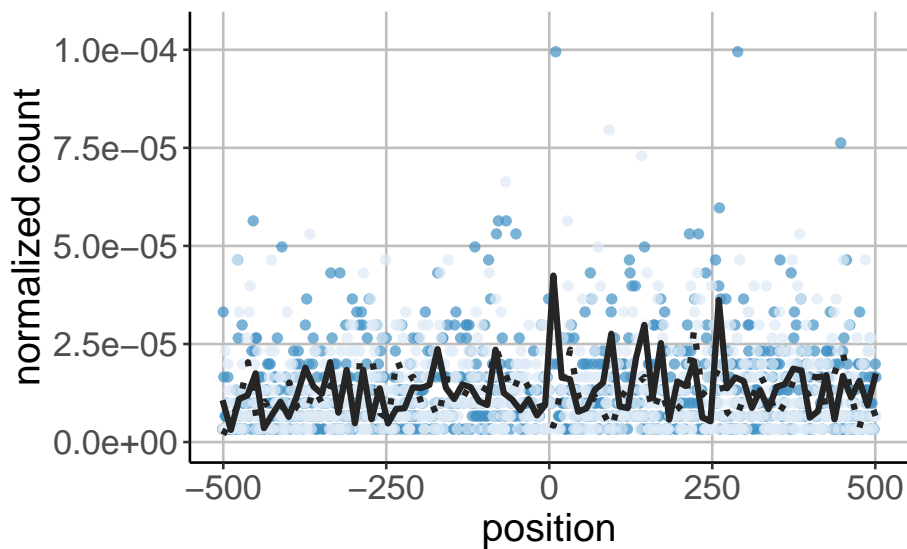

RBMS2–NUGCAUAAUGN

•• antisense — sense    • antisense • sense

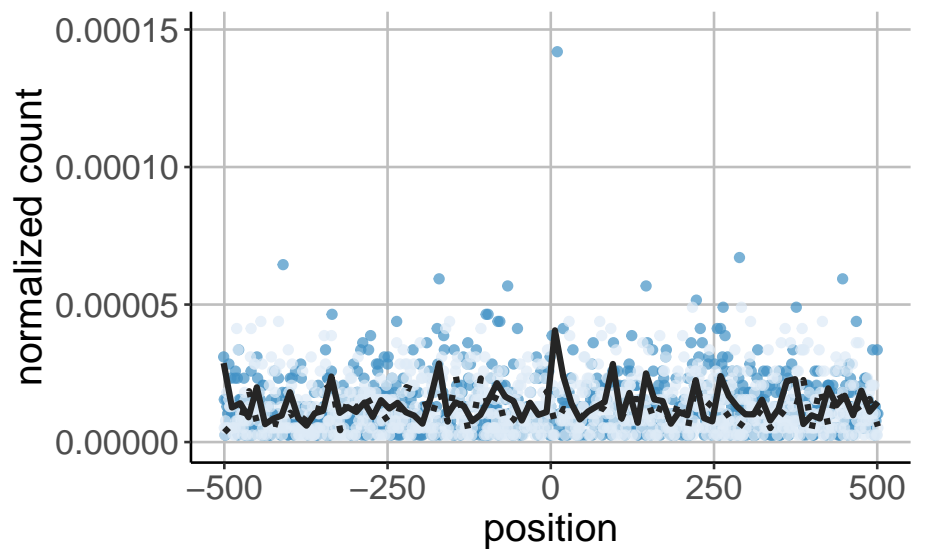

RBMS3–NUGCAUAAUGN

•• antisense — sense    • antisense • sense

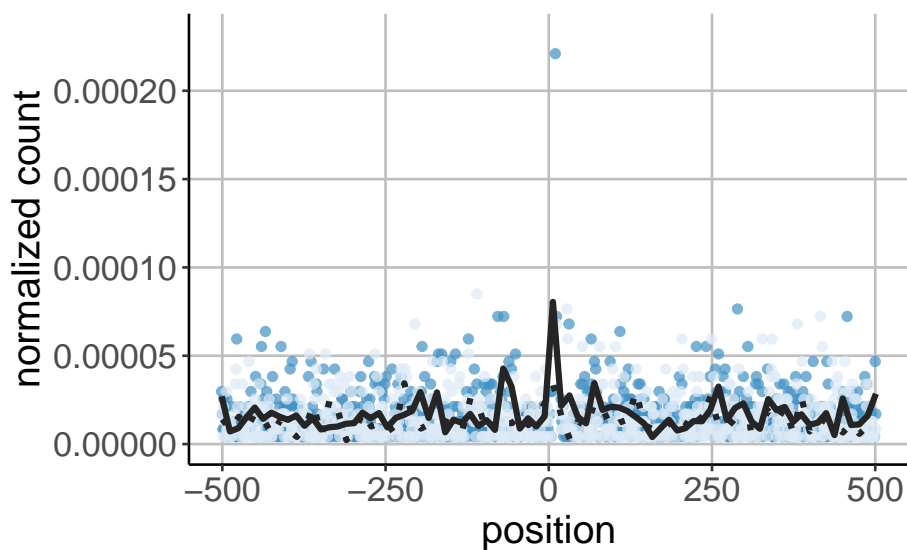

RBMS3–SAUGYAURAKKUG

•• antisense — sense    • antisense • sense

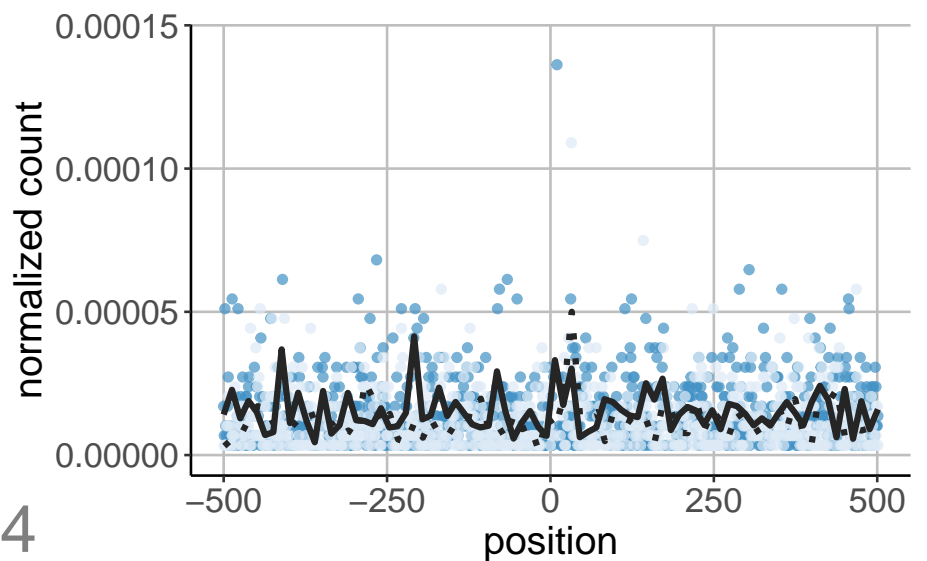

4

STOPcodon

RBM1E-NGCUUCGNGCN

•• antisense — sense    • antisense • sense

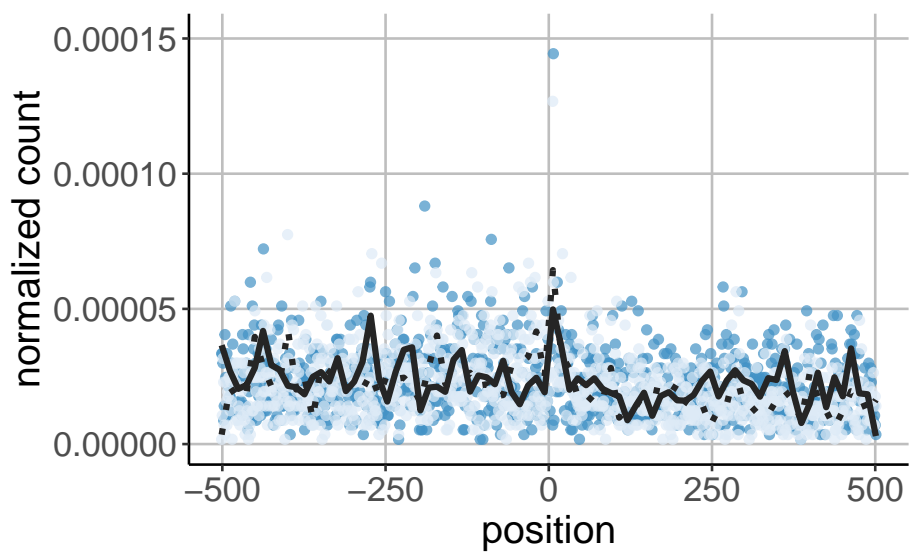

RBM1E-NAGCUUNGUGCUN

•• antisense — sense    • antisense • sense

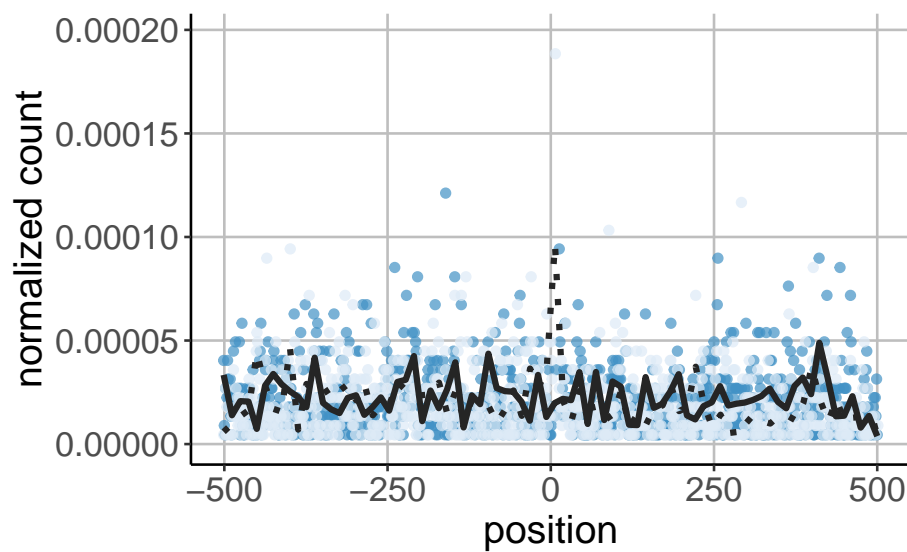

RBM1F-NGCCUCAAGGYN

•• antisense — sense    • antisense • sense

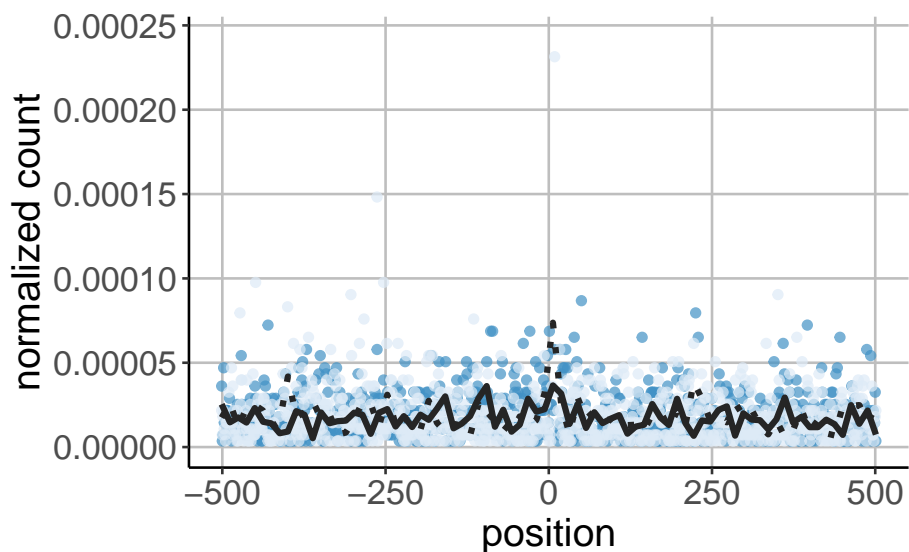

RBM1F-GCGCAAGAGC

•• antisense — sense    • antisense • sense

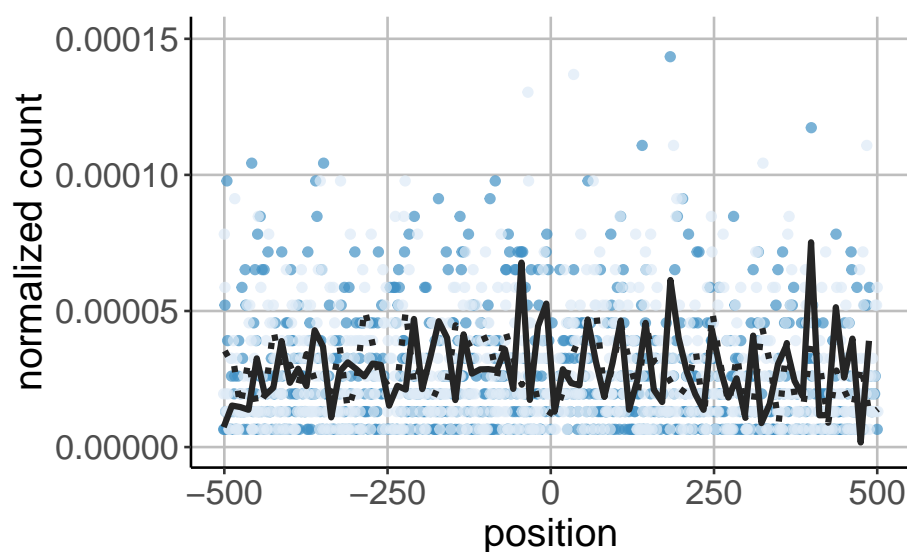

RBM1J-NGCCUCAAGGYN

•• antisense — sense    • antisense • sense

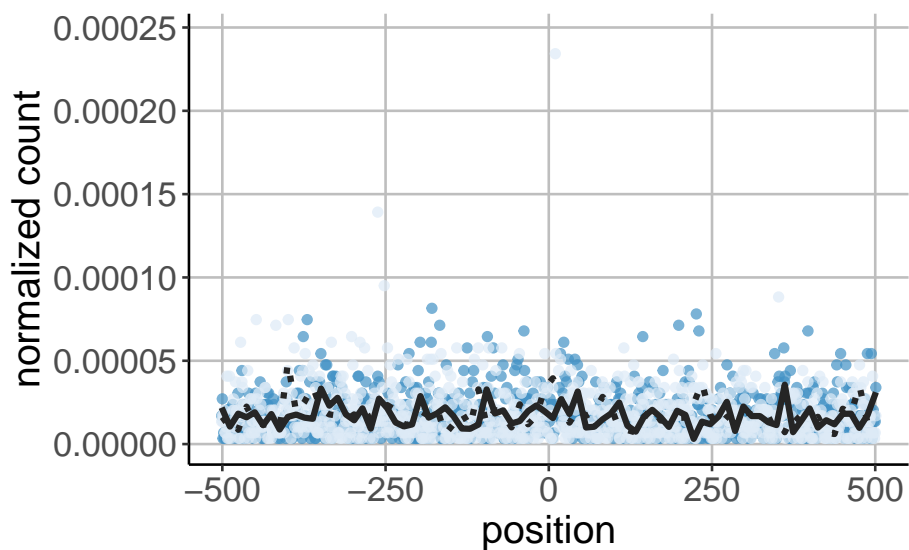

RBM1J-GCGCAAGAGC

•• antisense — sense    • antisense • sense

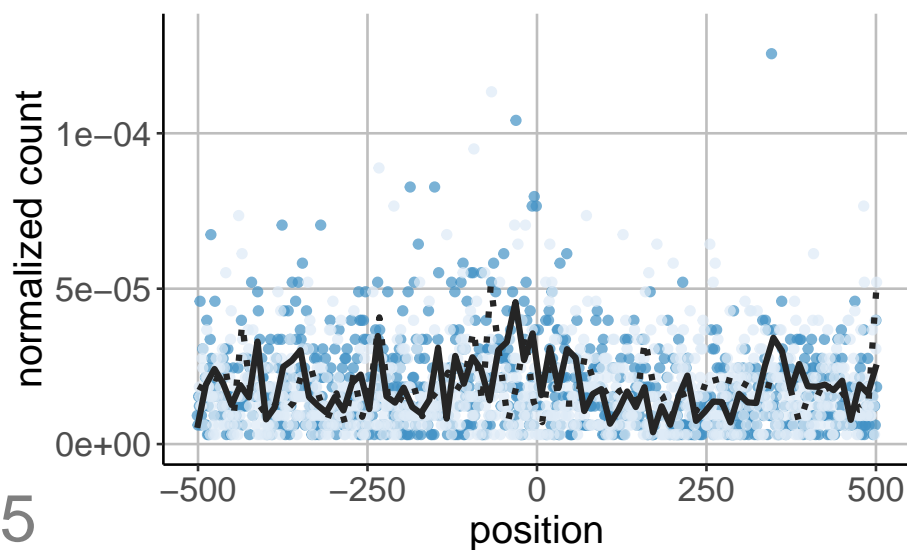

5

**STOPcodon**

RBM1J-NGCGUCGUGGCN

•• antisense — sense    • antisense • sense

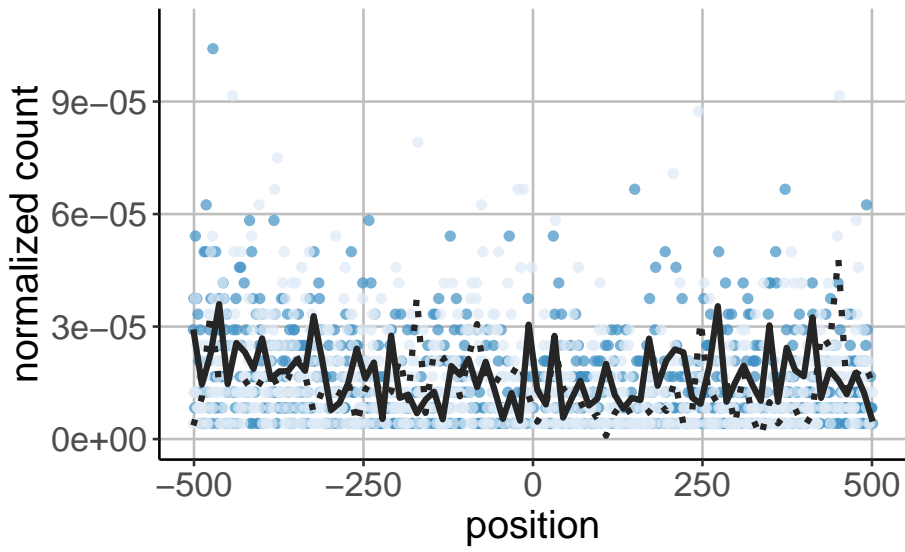

RBM1J-UGAAUUCGUCN

•• antisense — sense    • antisense • sense

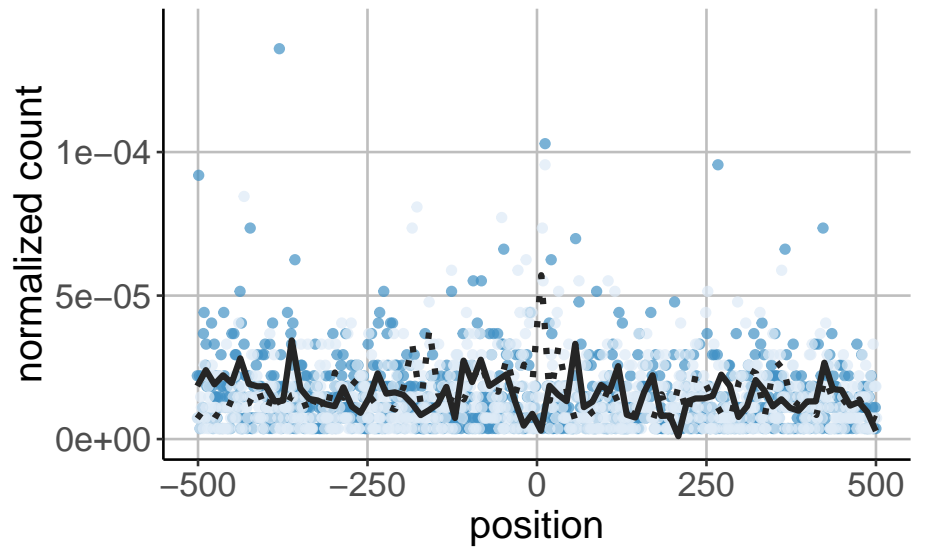

RC3H1\_2-YRCGUUUUAGKR

•• antisense — sense    • antisense • sense

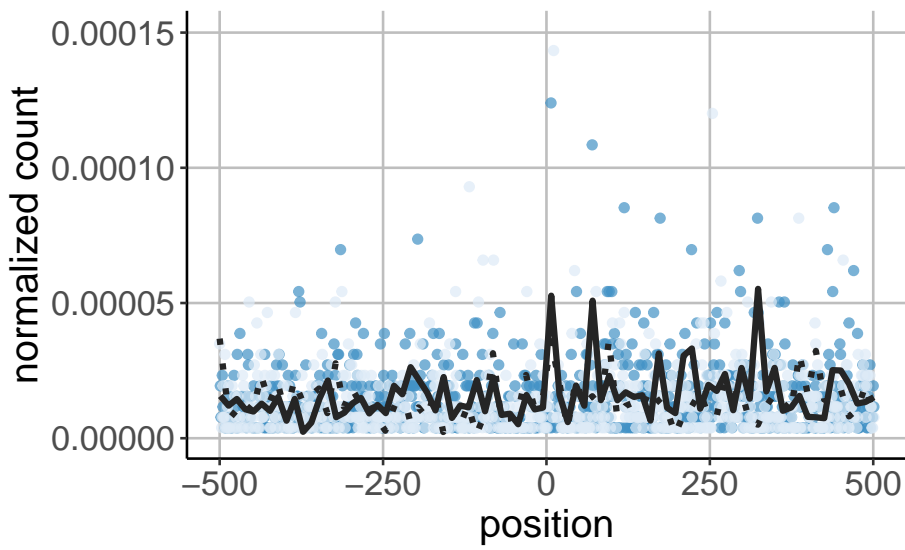

RC3H2-CURCGUUUUAGKAG

•• antisense — sense    • antisense • sense

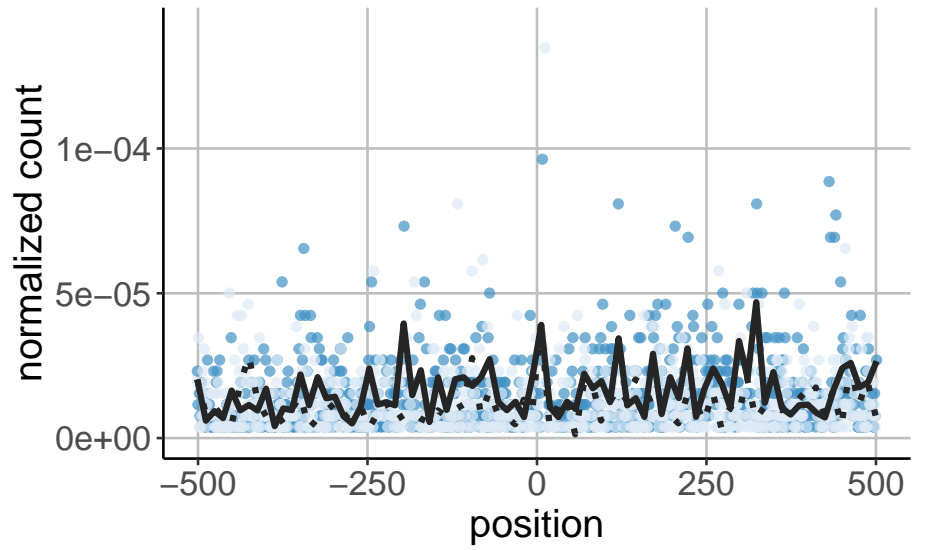

RC3H2-CUCGUAUCGAG

•• antisense — sense    • antisense • sense

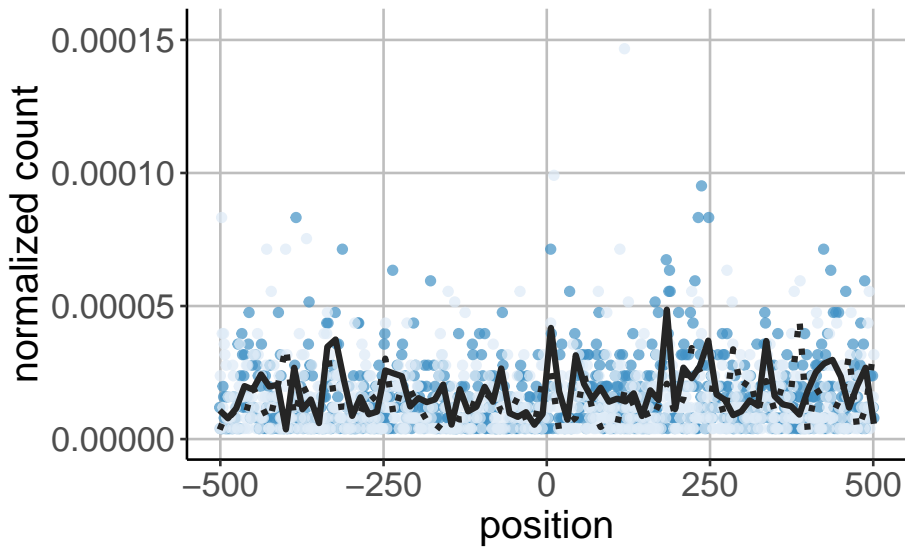

RC3H2-CCUCUNUGAGG

•• antisense — sense    • antisense • sense

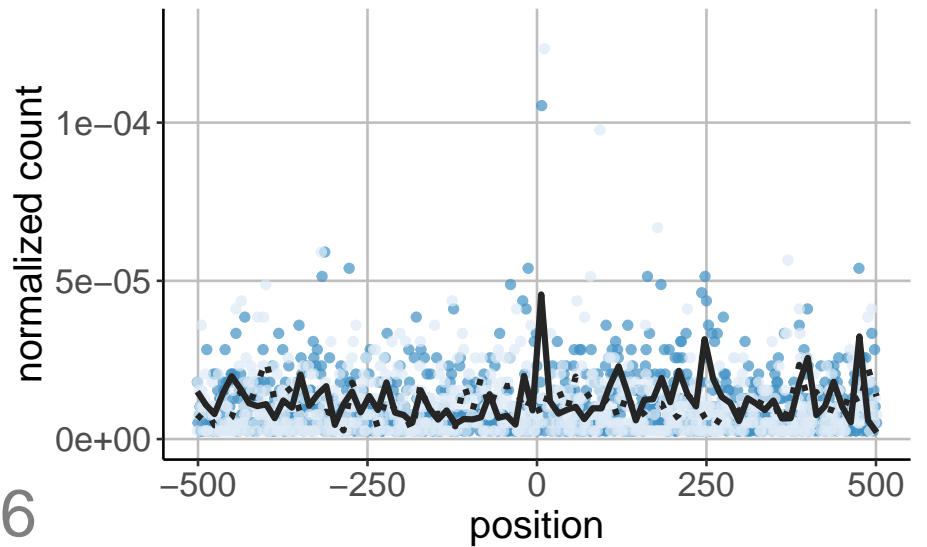

6



**STOPcodon**

RNPC3-GCAGUKUUAGGGY

•• antisense — sense    • antisense • sense

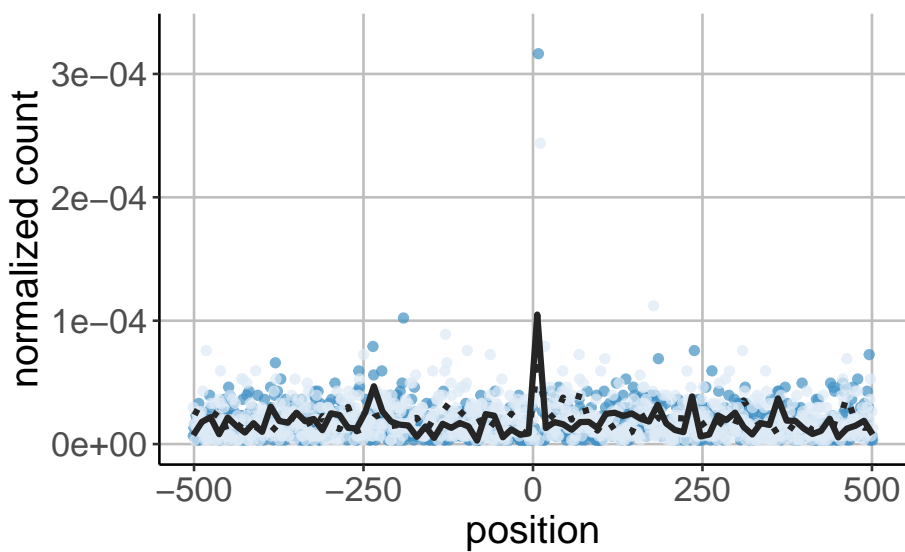

YBX1-RCCAYRHCAUCGY

•• antisense — sense    • antisense • sense

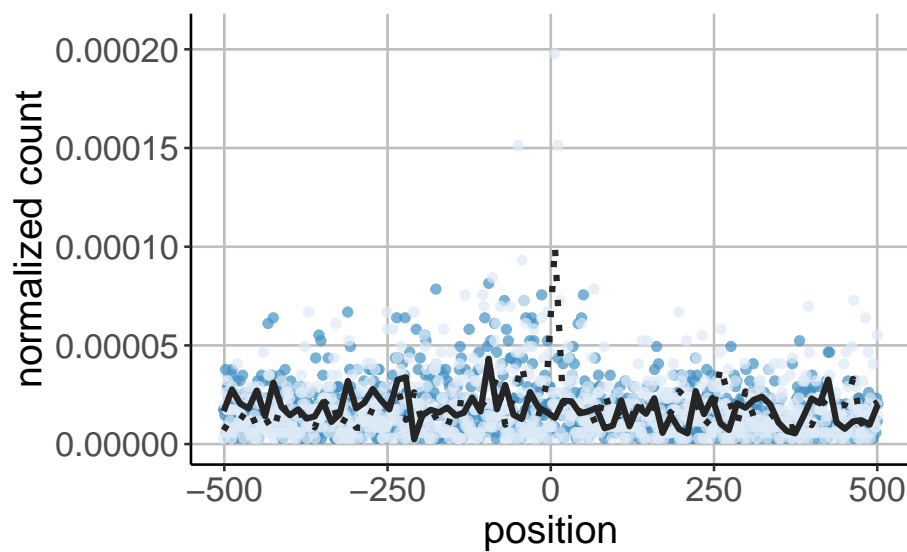

ZC3H12A-NGCAGGUAAGUGCN

•• antisense — sense    • antisense • sense

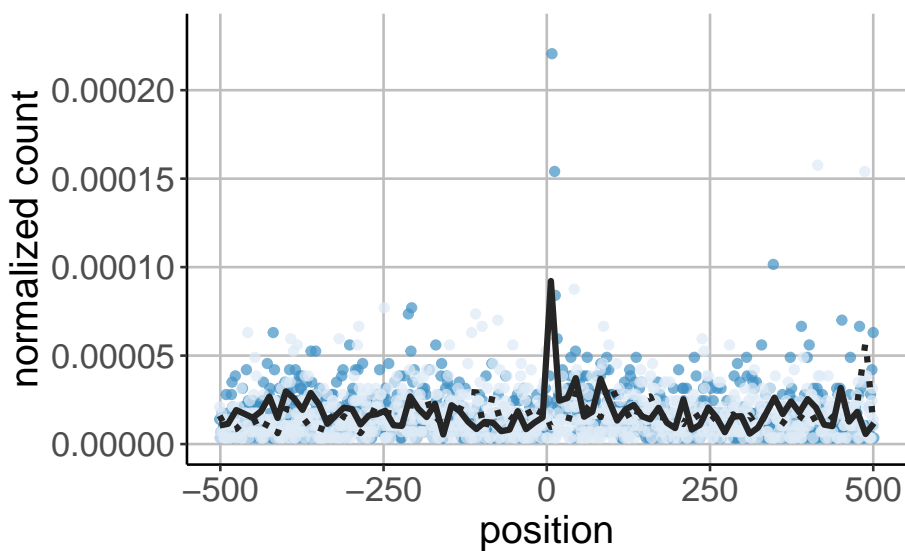

ZC3H12B-NGCAGGUAAGUGSN

•• antisense — sense    • antisense • sense

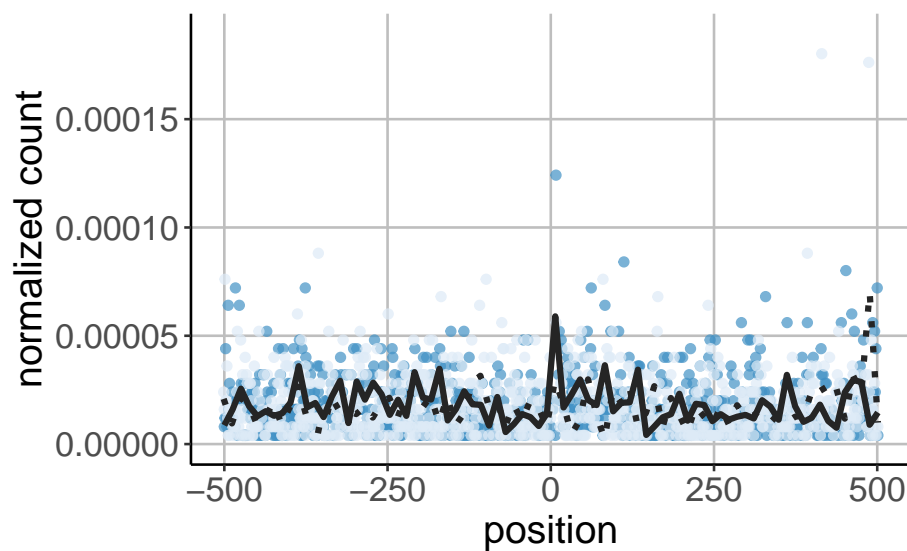

ZC3H12B-SCAGGUAUUAUGS

•• antisense — sense    • antisense • sense

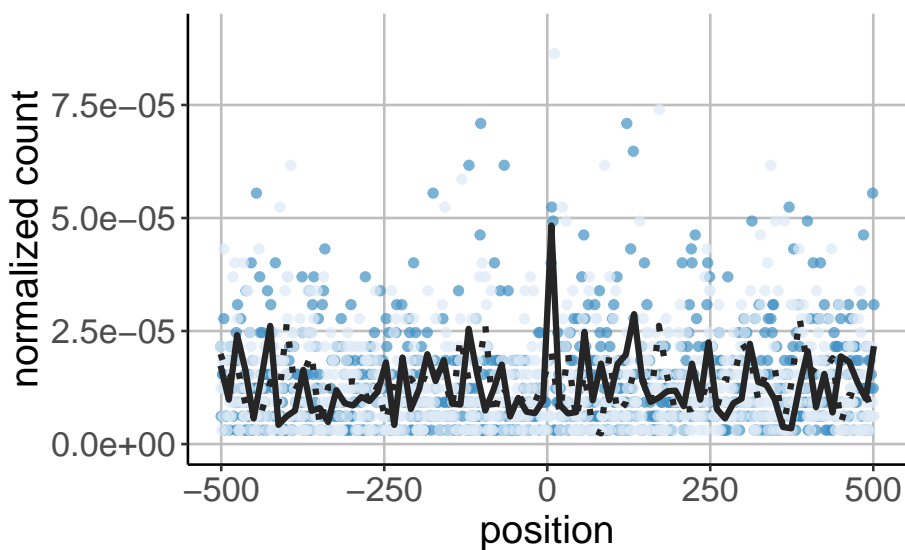

Supplement: supp_gr.258848.119_Supplemental_Data_S1.pdf [file supp_gr.258848.119_Supplemental_Data_S1.pdf]
