# Supplementary material for: Binding specificities of human RNA-binding proteins toward structured and linear RNA sequences
Source: PubMed Central journal article supplement — Genome Res. 2020 Jul;30(7):962–73. doi: 10.1101/gr.258848.119 (PMC7397871; doi:10.1101/gr.258848.119), 2020-07

## **Meta-plots of the motif match enrichment near splice donor, acceptor, TSS, start and stop codon positions (common y-axis scale)**

### **Table of contents**

*(Click line to access the first page of each section)*

|                                                   |                               |
|---------------------------------------------------|-------------------------------|
| <b>Splice acceptor, linear motif</b>              | <a href="#">Pages 1-17</a>    |
| <b>Splice acceptor, structured motif</b>          | <a href="#">Pages 18-24</a>   |
| <b>Splice donor, linear motif</b>                 | <a href="#">Pages 25-41</a>   |
| <b>Splice donor, structured motif</b>             | <a href="#">Pages 42-48</a>   |
| <b>Transcription start site, linear motif</b>     | <a href="#">Pages 49-65</a>   |
| <b>Transcription start site, structured motif</b> | <a href="#">Pages 66-72</a>   |
| <b>Start codon, linear motif</b>                  | <a href="#">Pages 73-89</a>   |
| <b>Stop codon, structured motif</b>               | <a href="#">Pages 90-96</a>   |
| <b>Start codon, linear motif</b>                  | <a href="#">Pages 97-113</a>  |
| <b>Stop codon, structured motif</b>               | <a href="#">Pages 114-120</a> |

acceptor

ZC3H8-GCUUGC

• antisense — sense    • antisense • sense

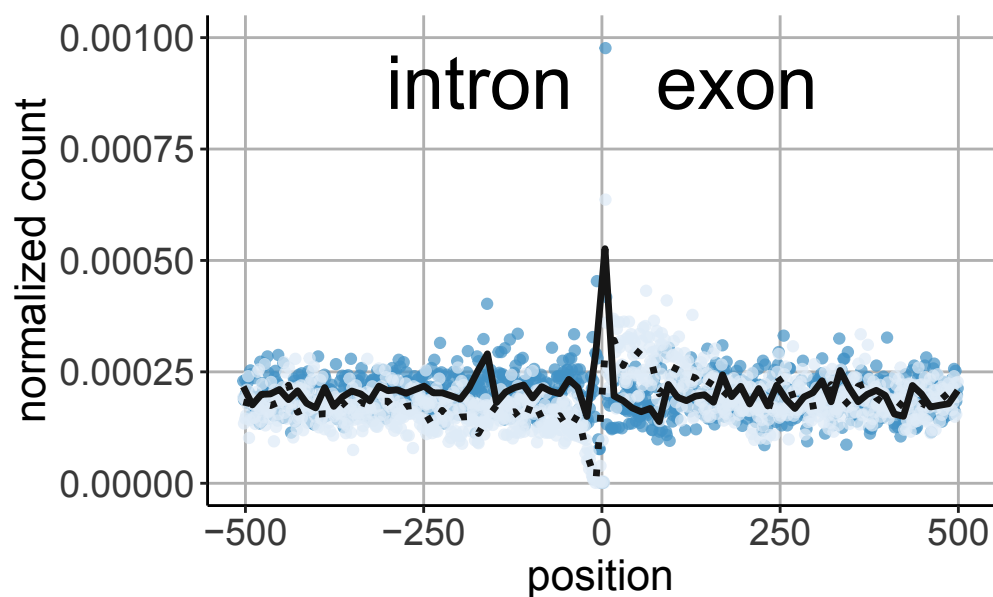

ESRP1\_3-GGUGUUGGUG

• antisense — sense    • antisense • sense

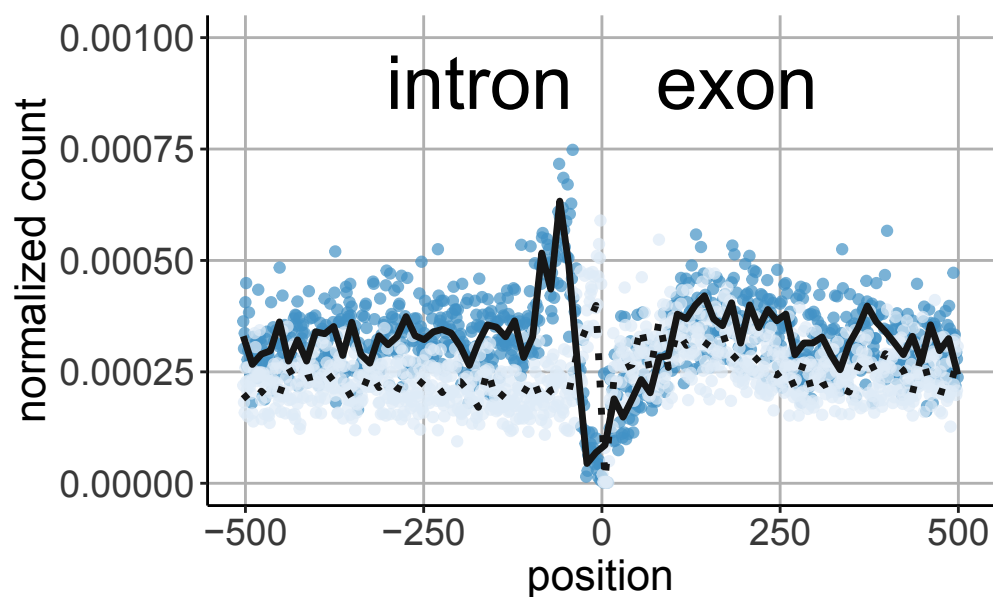

ELAVL3-GUUUUUG

• antisense — sense    • antisense • sense

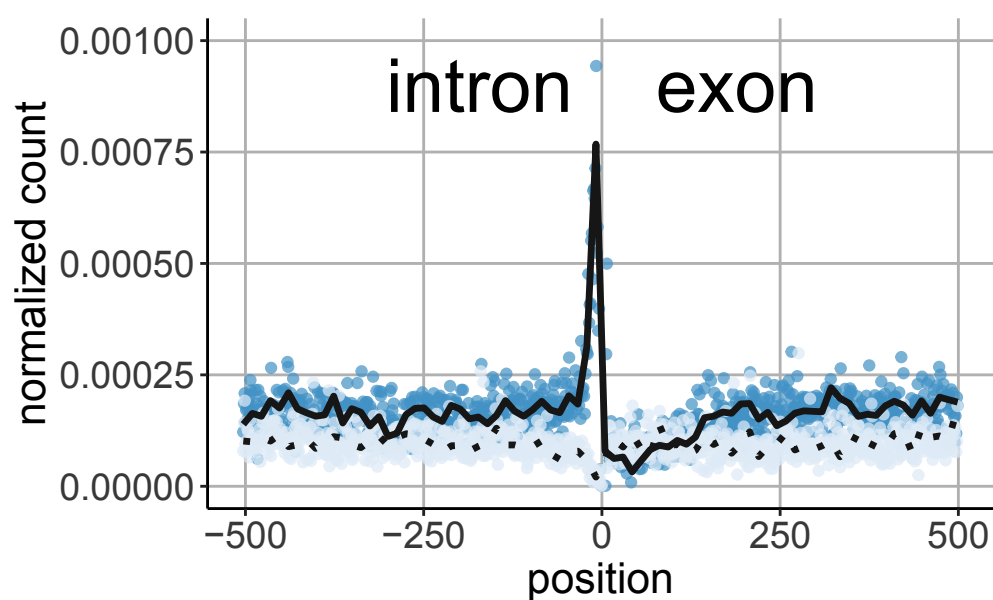

PUM1-NUGUAAAUAG

• antisense — sense    • antisense • sense

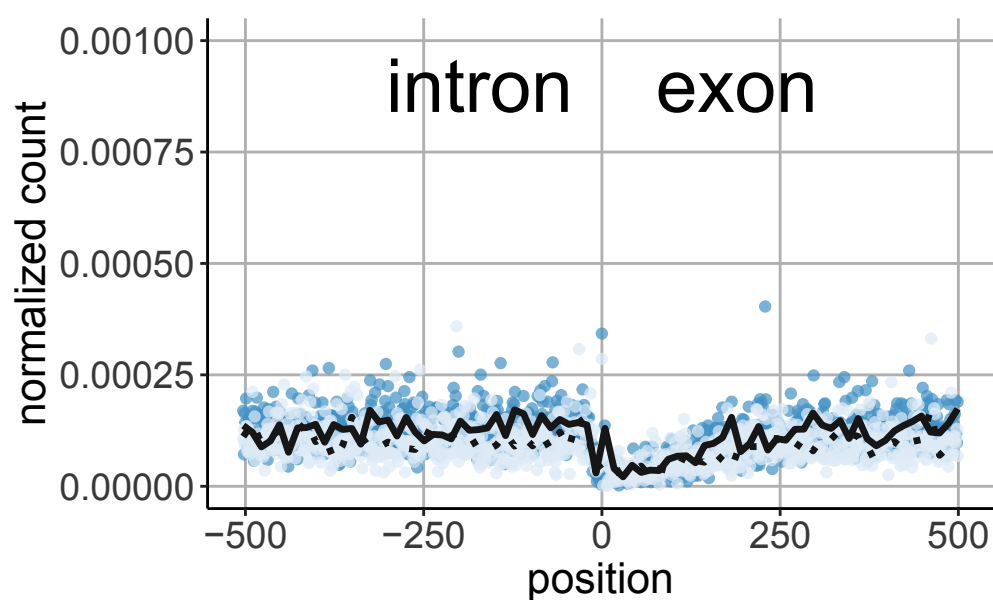

QKI-NUACUAACAWN

• antisense — sense    • antisense • sense

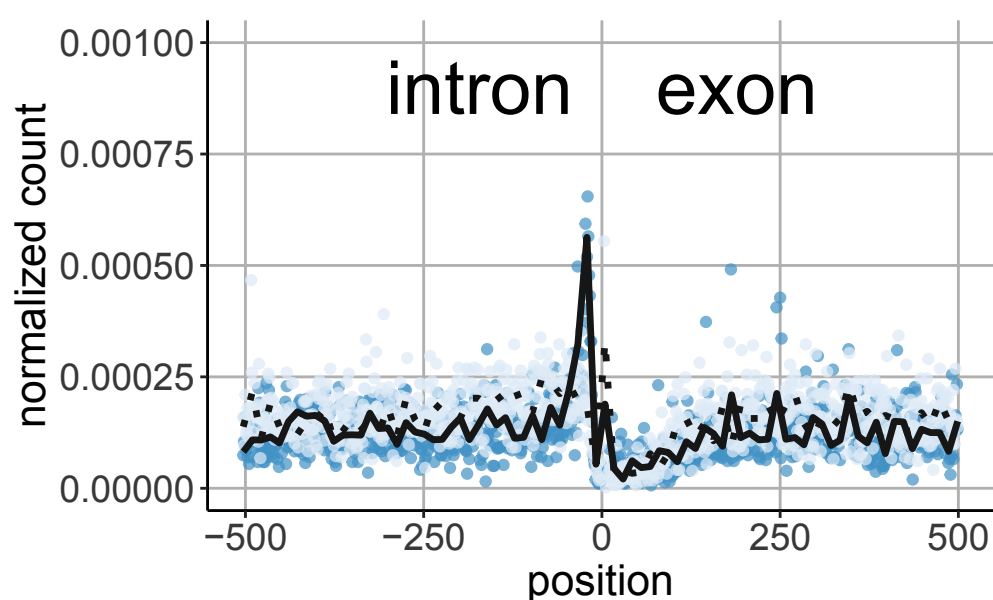

MCM3AP-CGCCAGUGCG

• antisense — sense    • antisense • sense

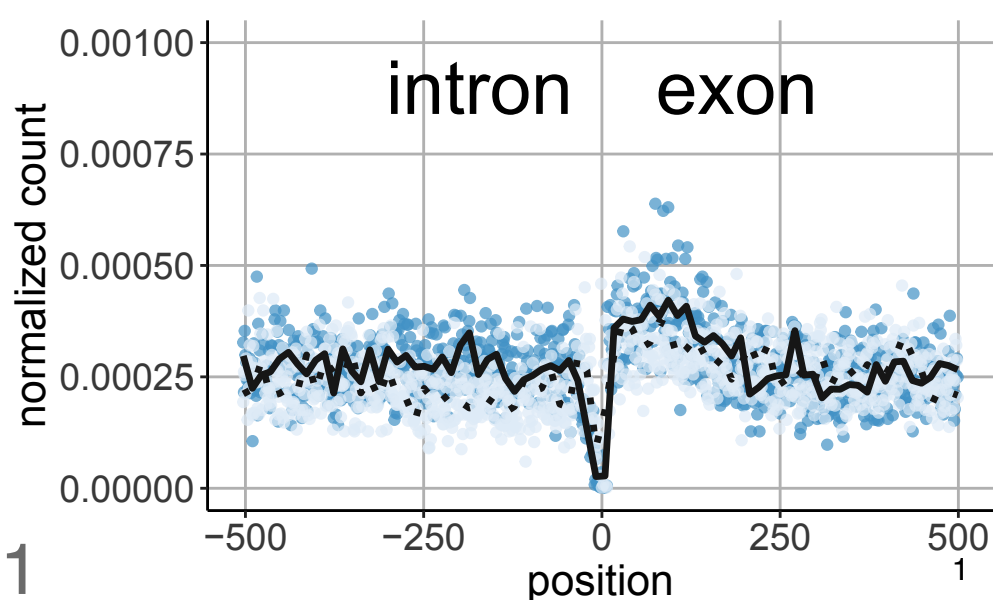

1

1

acceptor

HNRNPC-UUUUUGGUGG

•• antisense — sense    • antisense • sense

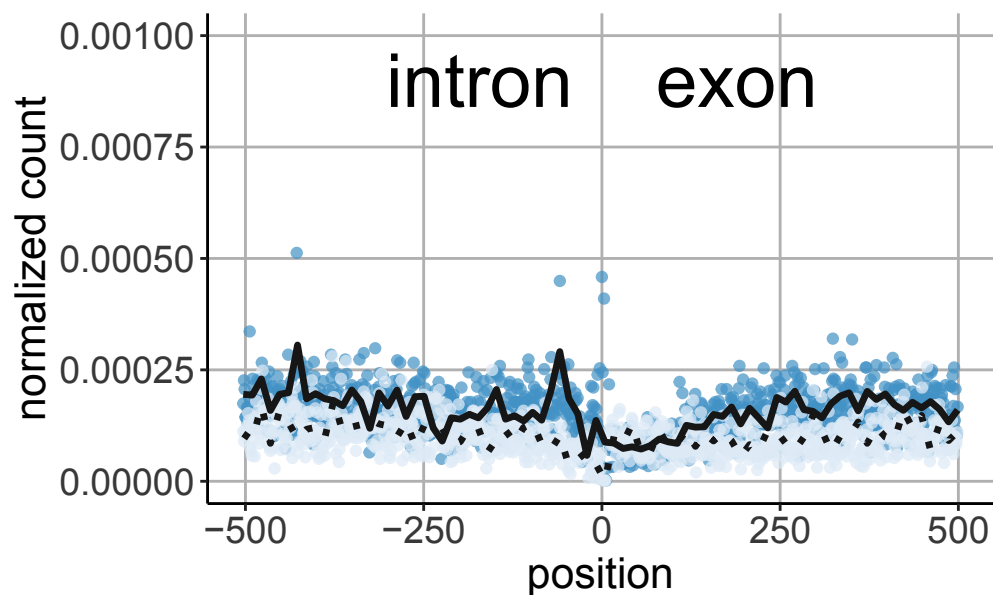

PABPC5-NUAKAAAKUURCN

•• antisense — sense    • antisense • sense

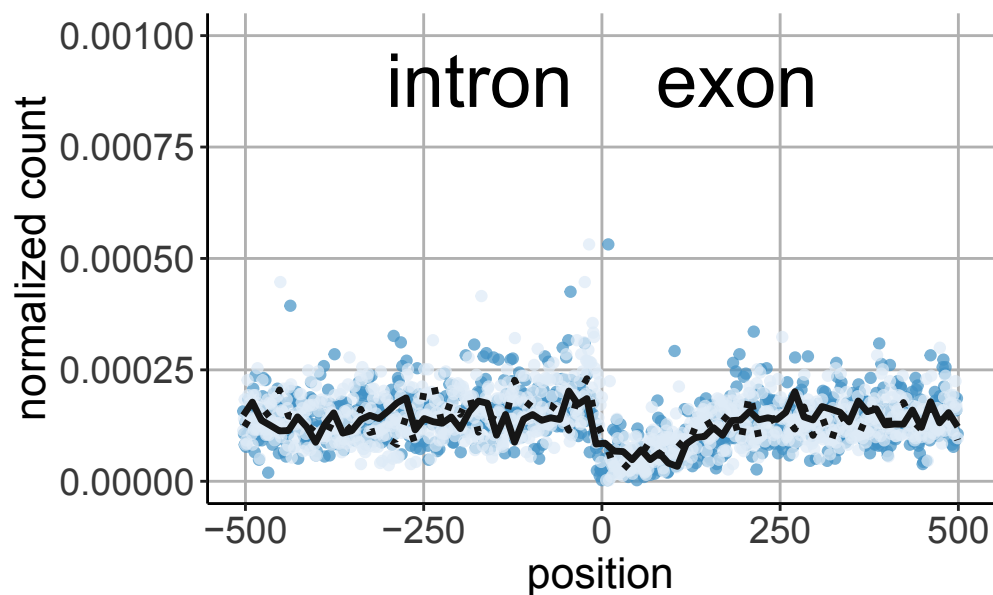

PABPC5-NUAKAAAUUACUACAN

•• antisense — sense    • antisense • sense

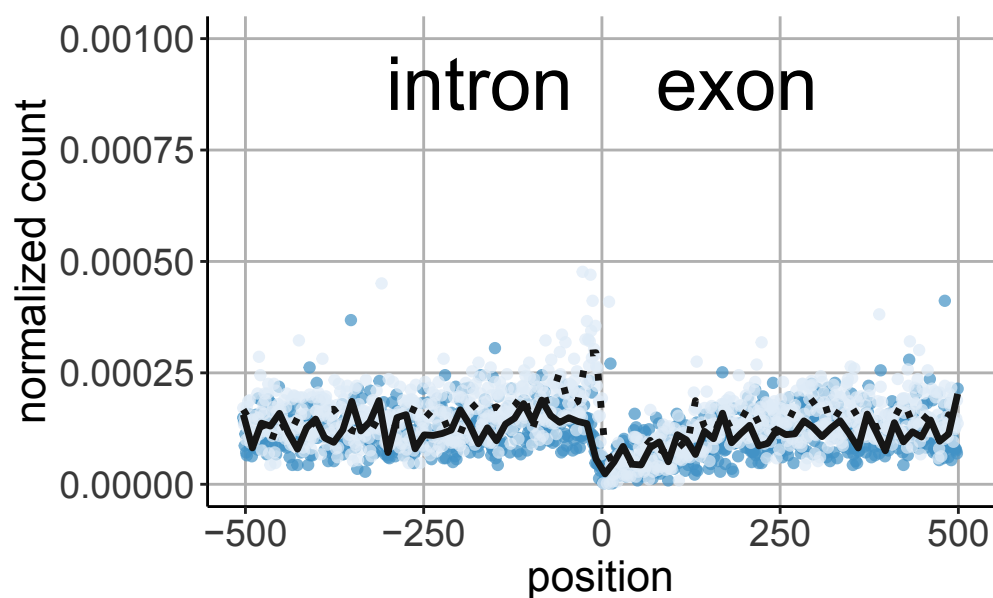

LARP7\_4-GRUCGUGAUGN

•• antisense — sense    • antisense • sense

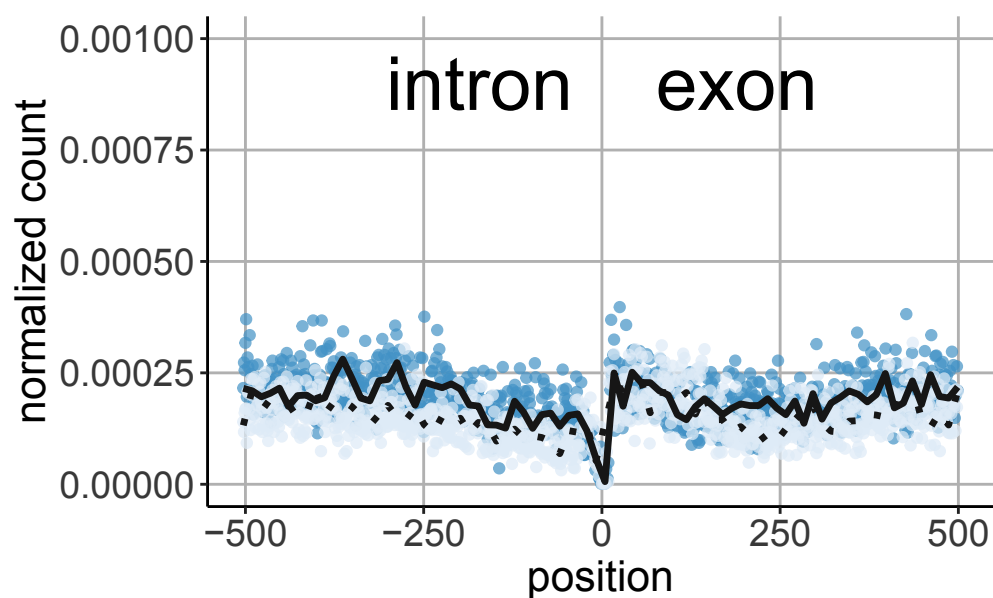

ZCRB1-GUAUUAAGGG

•• antisense — sense    • antisense • sense

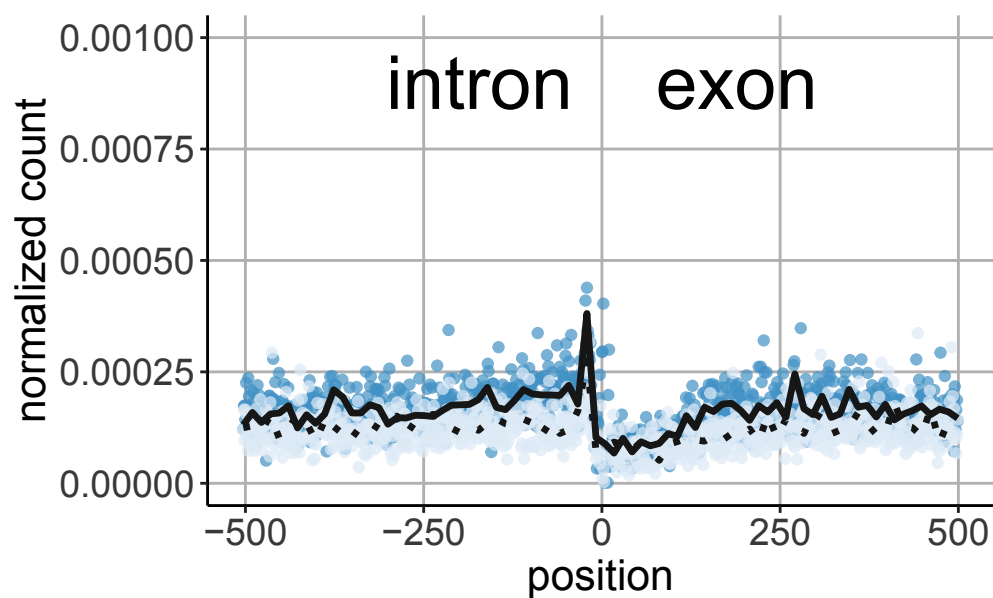

ZCRB1-GUGGACUUAANN

•• antisense — sense    • antisense • sense

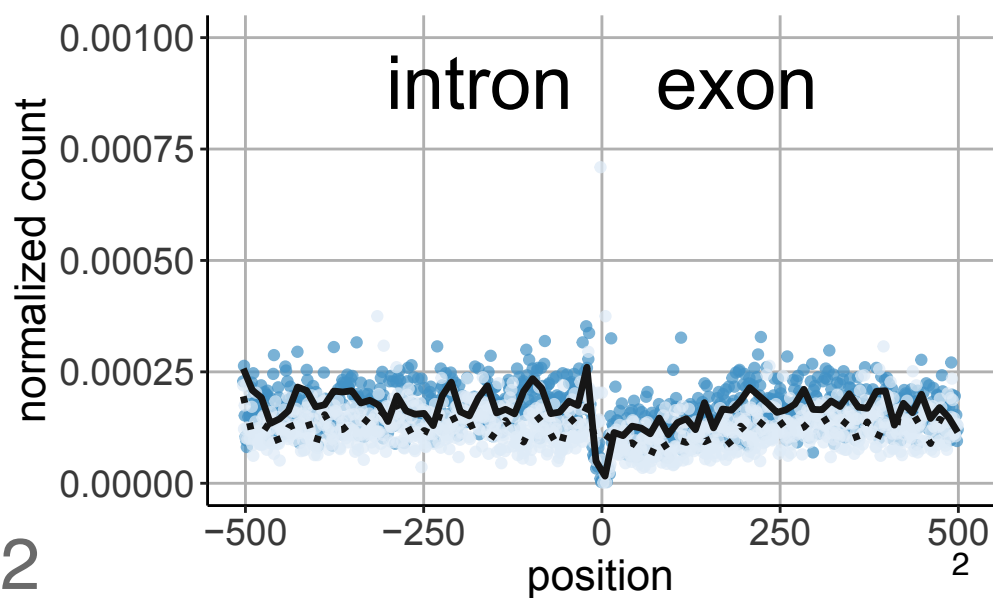

acceptor

RBM42-NGGAACUAAN

KHDRBS1-UAAUAGN

•• antisense — sense    • antisense • sense

•• antisense — sense    • antisense • sense

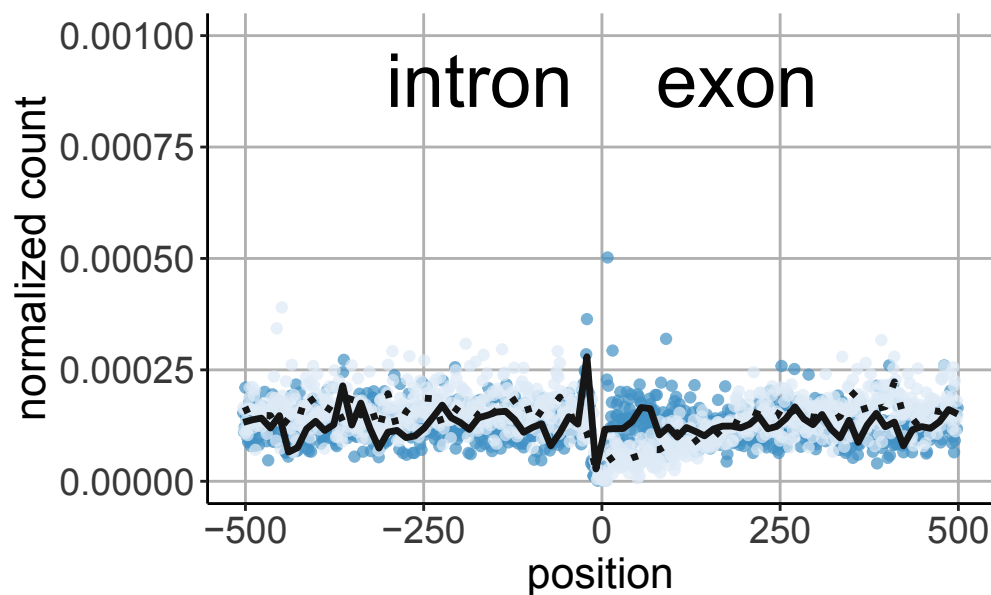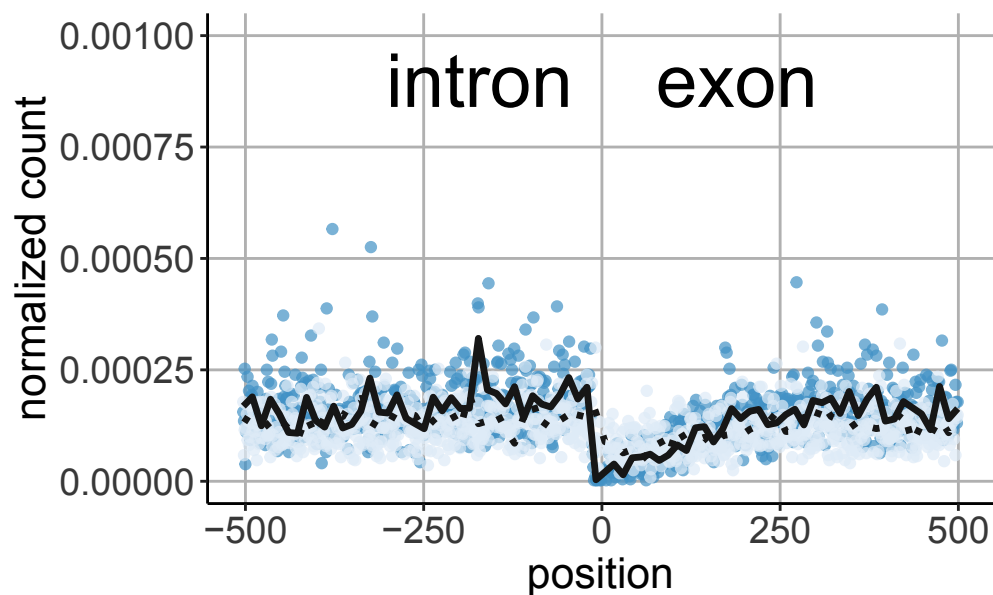

HNRNPCL1-GUUUUUUGGG

ZFR\_4-GUGACGGAUG

•• antisense — sense    • antisense • sense

•• antisense — sense    • antisense • sense

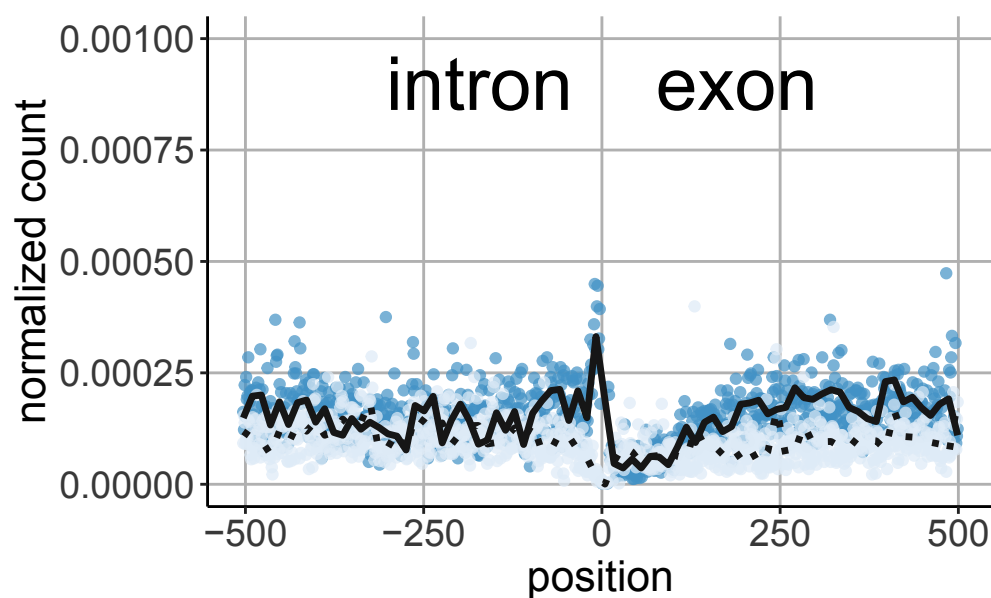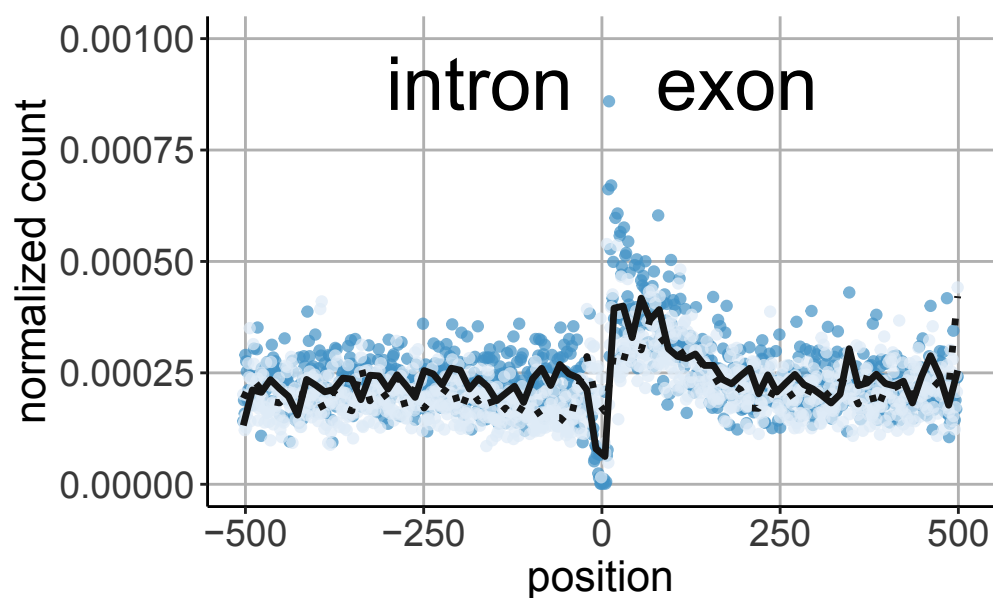

ZFR\_4-GUGC GGAUGN

HNRPLL-GCAURCAYCC

•• antisense — sense    • antisense • sense

•• antisense — sense    • antisense • sense

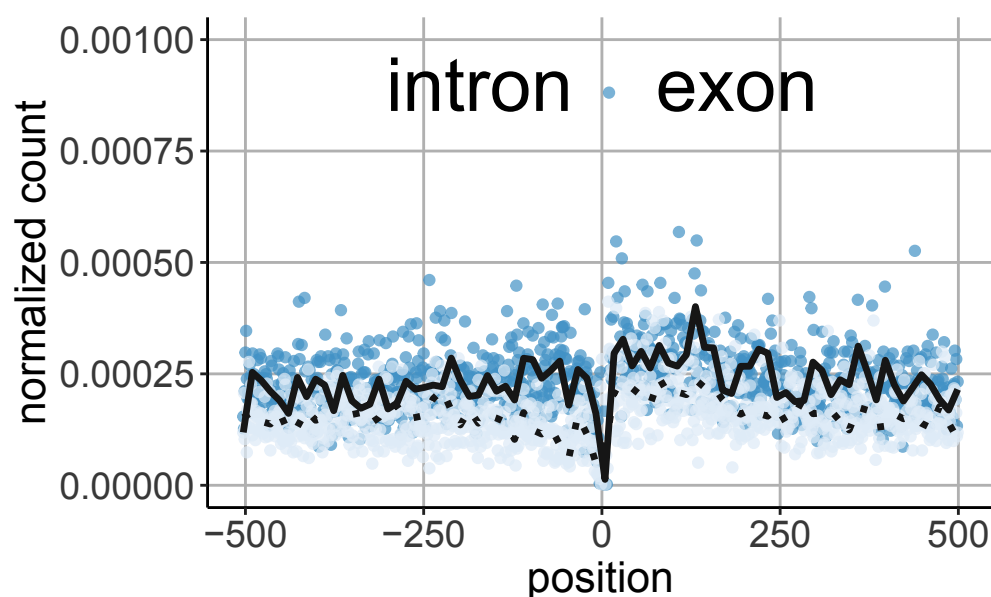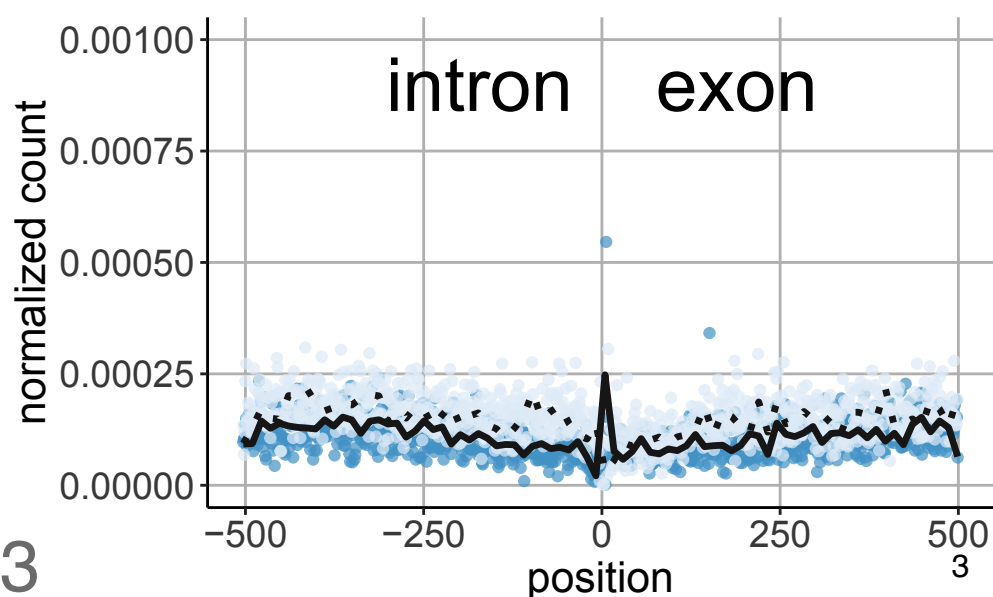

acceptor

ZC3H12C-NUGCGNCAGUCGGUAGC

•• antisense — sense    • antisense • sense

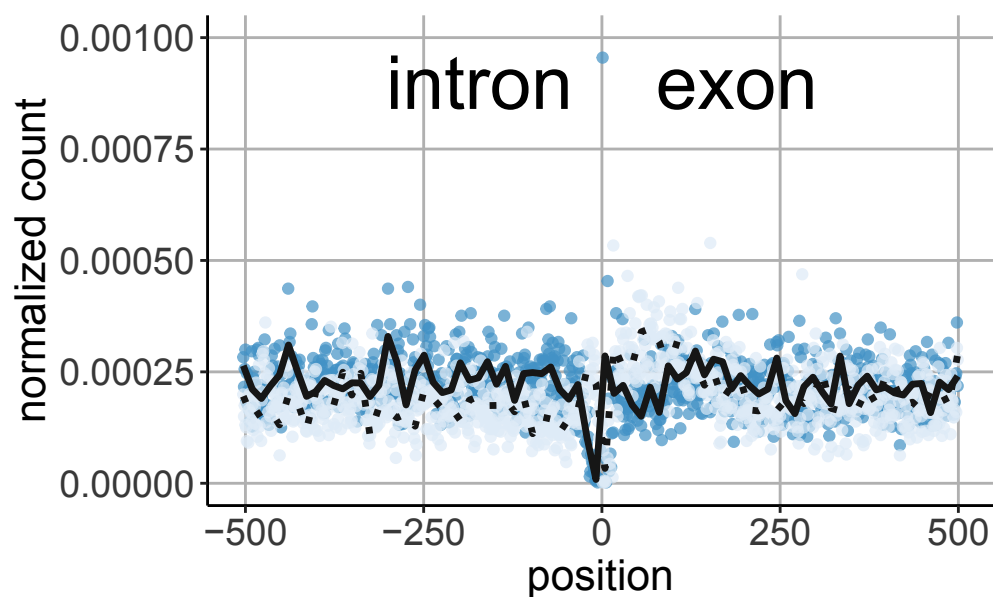

HNRNPL\_2-ACAUWWCAUW

•• antisense — sense    • antisense • sense

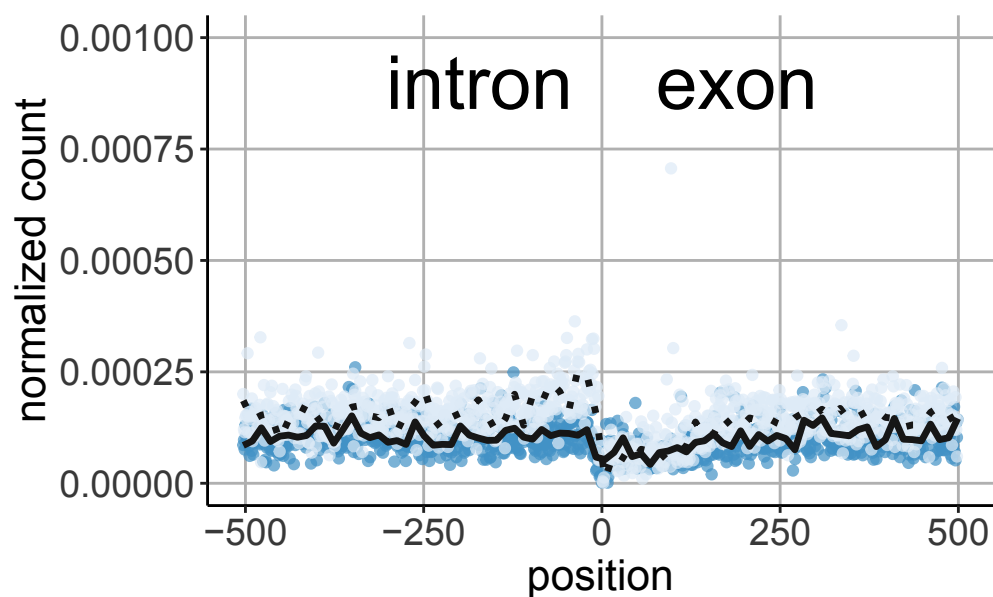

RBMS2-CAGUGAUUGG

•• antisense — sense    • antisense • sense

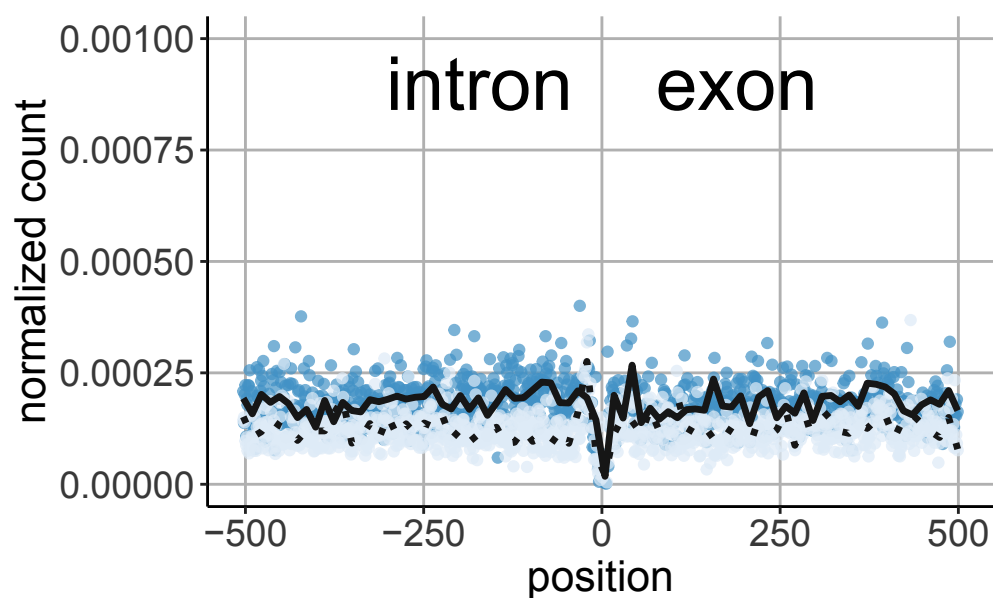

RBM14-GGKUGCGUCG

•• antisense — sense    • antisense • sense

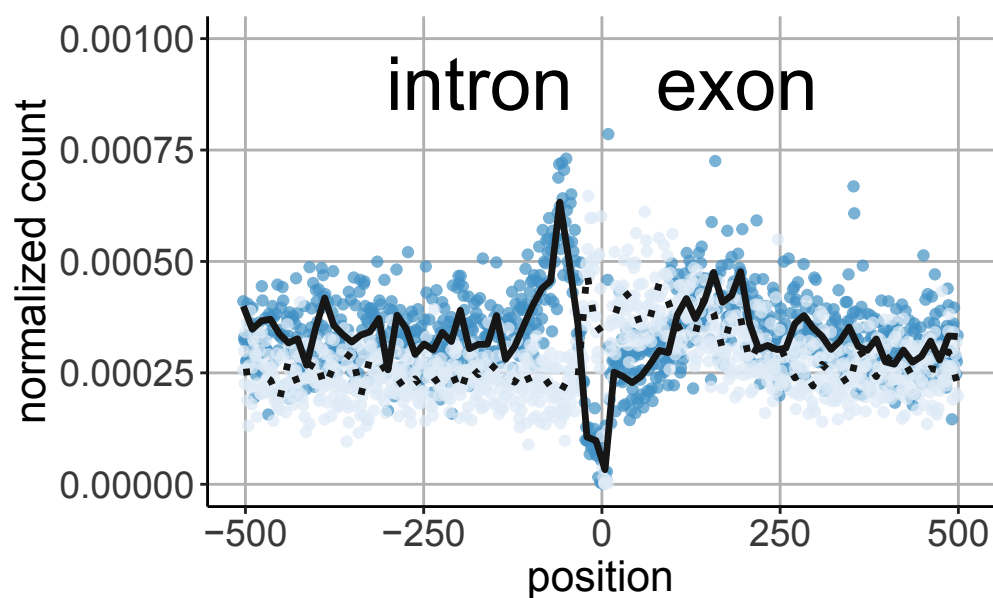

RBMS2-CGUAUAUAG

•• antisense — sense    • antisense • sense

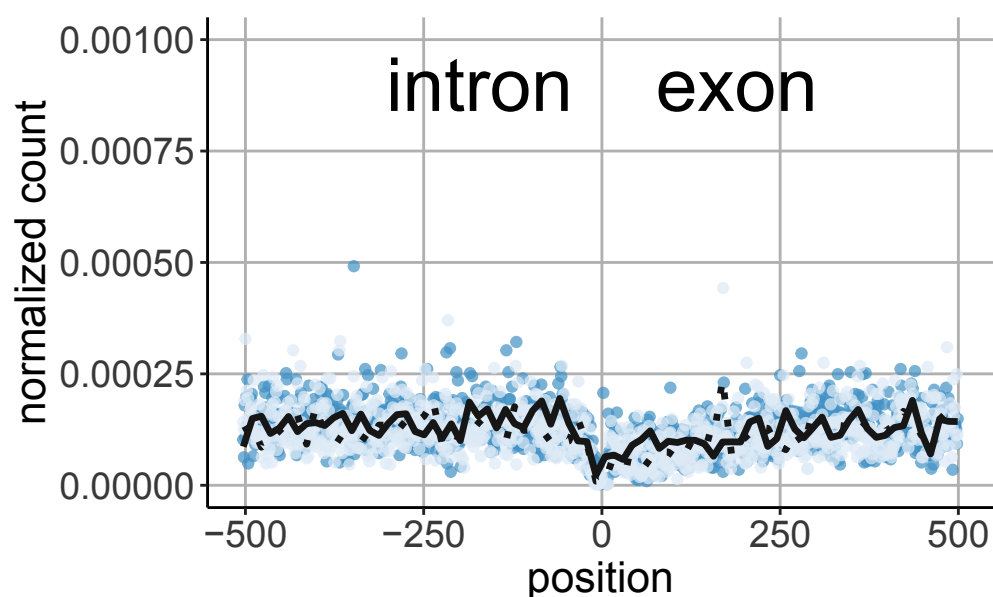

RBMS1-GUAUUUAKNGGG

•• antisense — sense    • antisense • sense

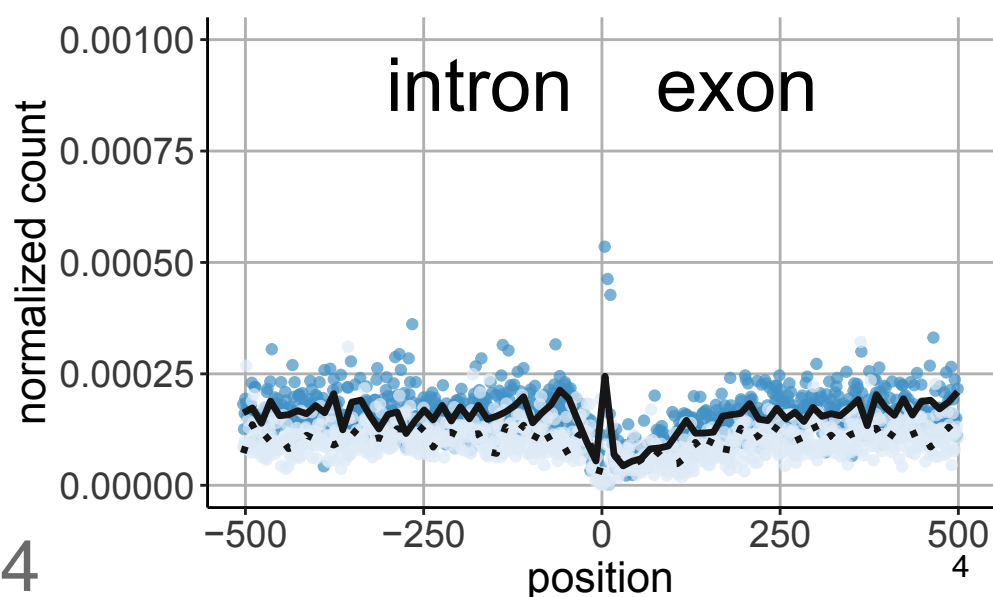

acceptor

RBMS1-UUAUAAUCAAC

• antisense — sense • antisense • sense

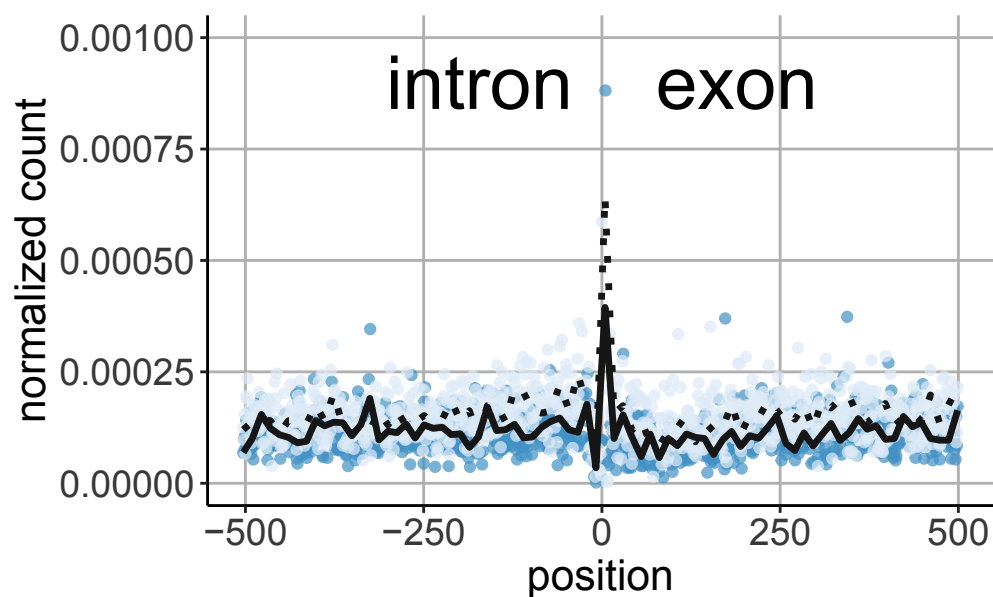

NOVA2\_3-UCAUUCAU

• antisense — sense • antisense • sense

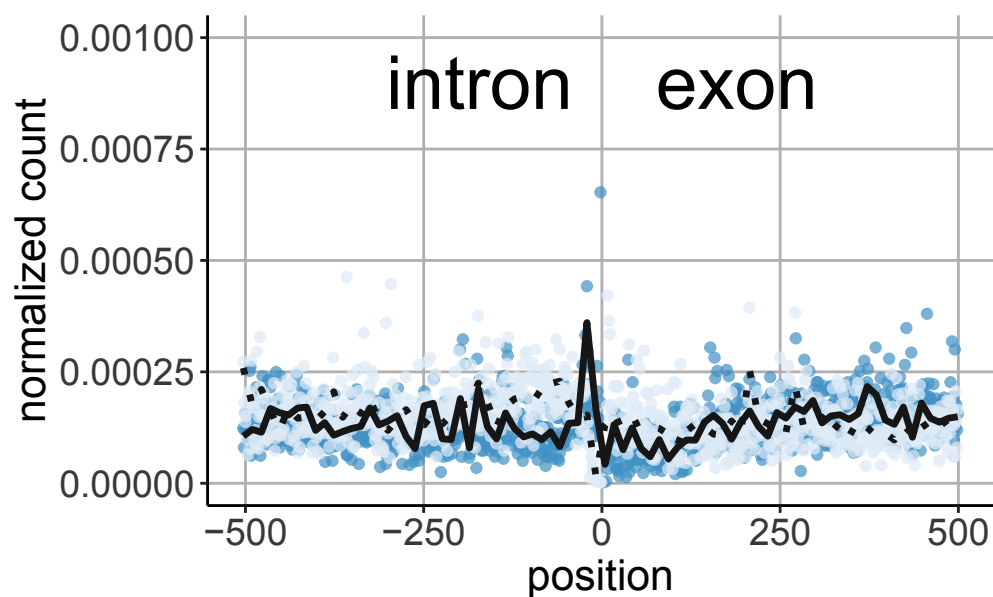

ZFP36-KUAUUUAUGGUGG

• antisense — sense • antisense • sense

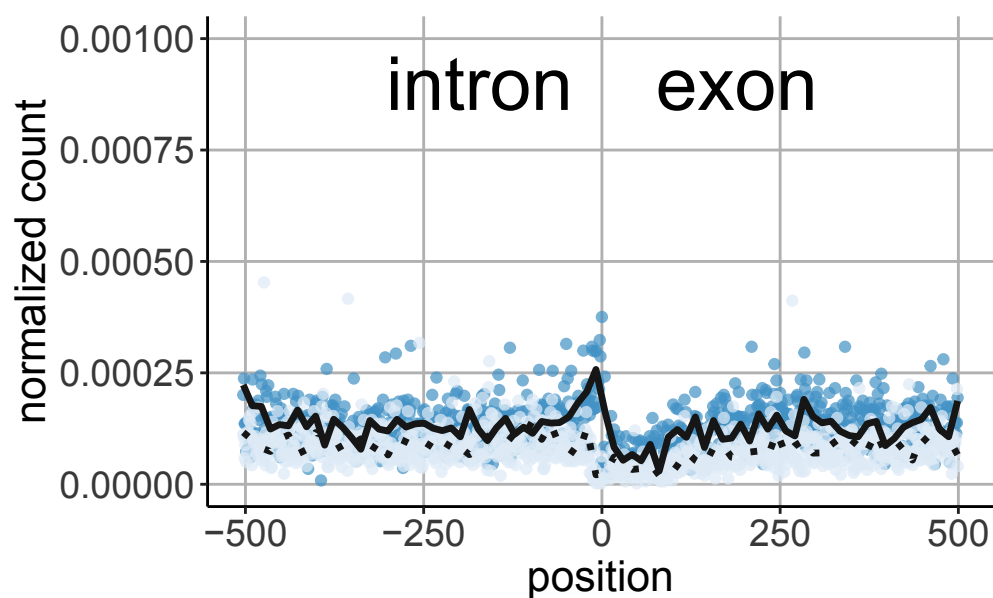

ZFP36-UUAUUUAUU

• antisense — sense • antisense • sense

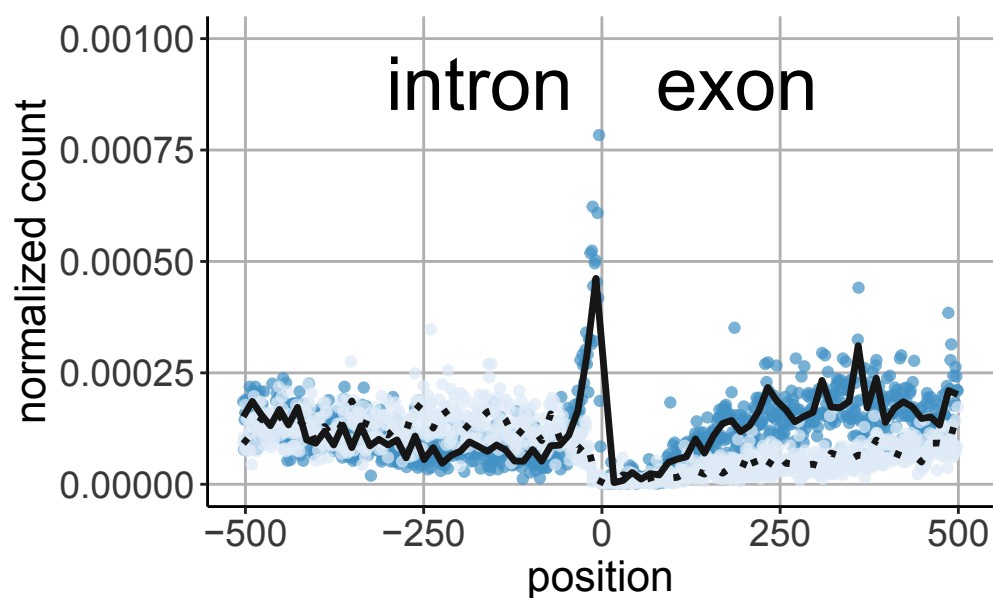

ELAVL4-UUUUAUUUUUG

• antisense — sense • antisense • sense

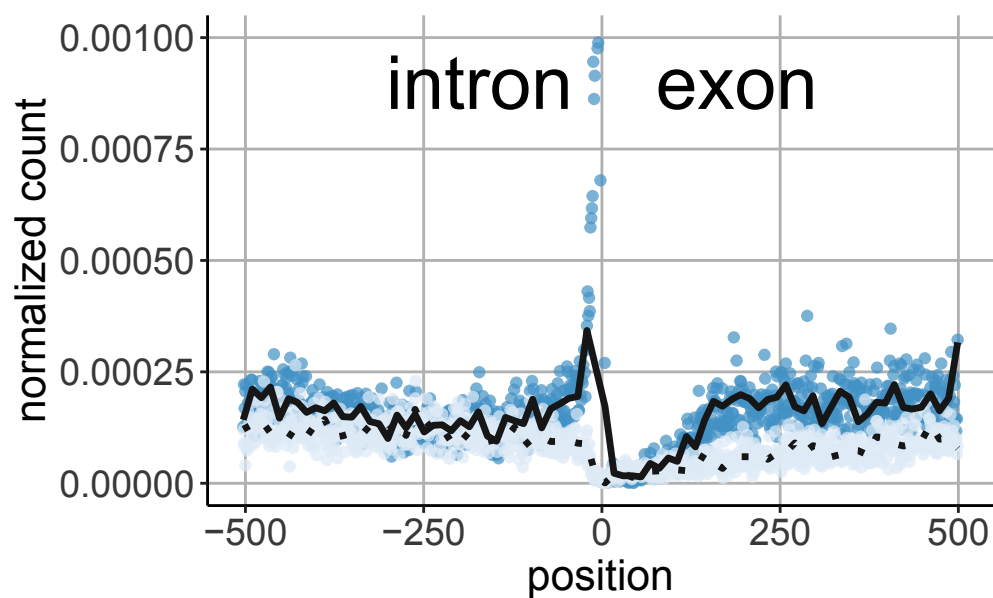

QKI-ACUAACANNACUAACA

• antisense — sense • antisense • sense

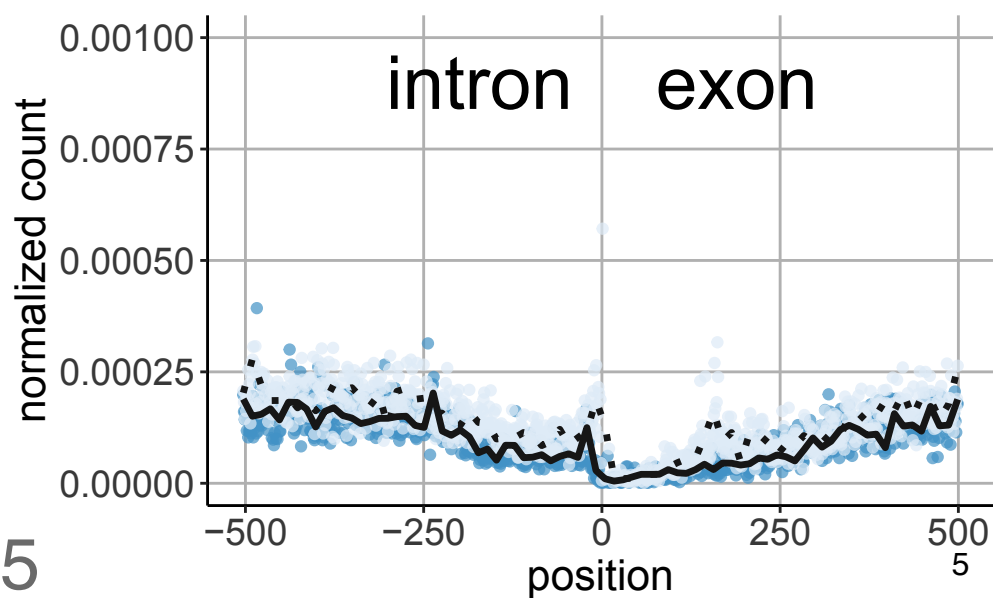

5

5

acceptor

TARDBP-GUGUGAAUGG

•• antisense — sense    • antisense • sense

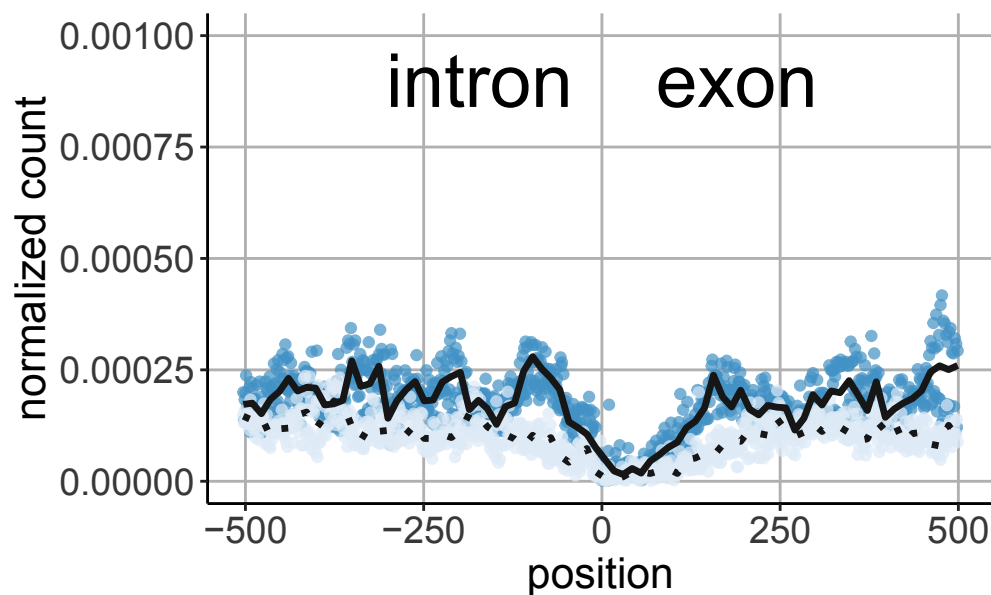

TARDBP-GUGUGNGUGUG

•• antisense — sense    • antisense • sense

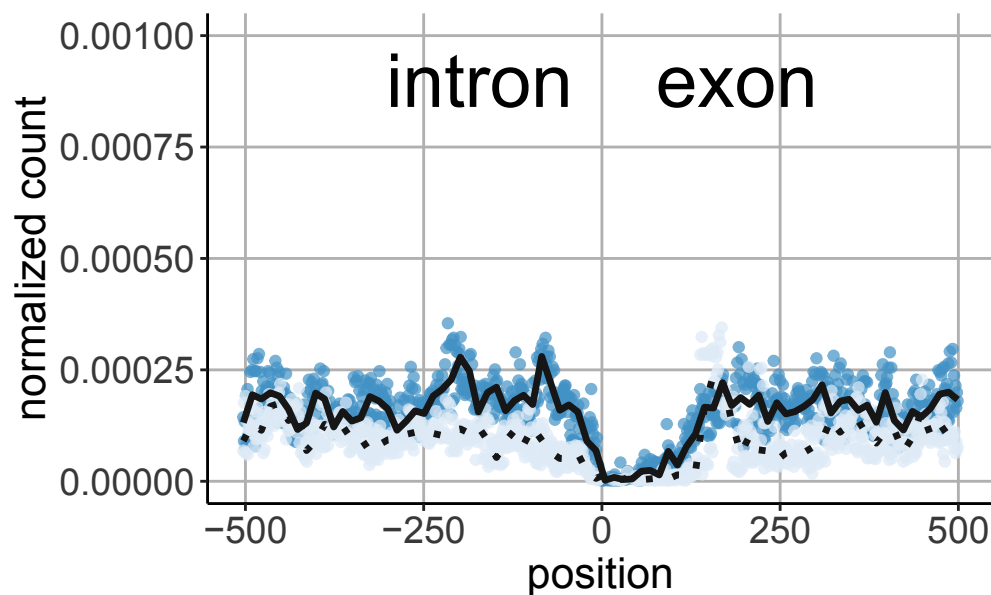

PUM2-NNUGUAYAGK

•• antisense — sense    • antisense • sense

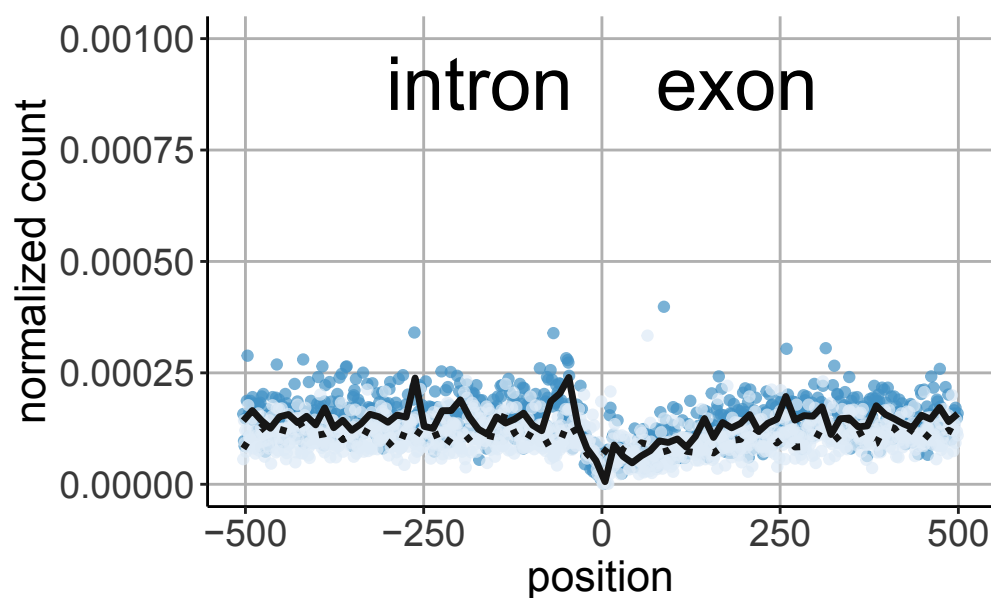

PUM2-NUGUAAAUAGKN

•• antisense — sense    • antisense • sense

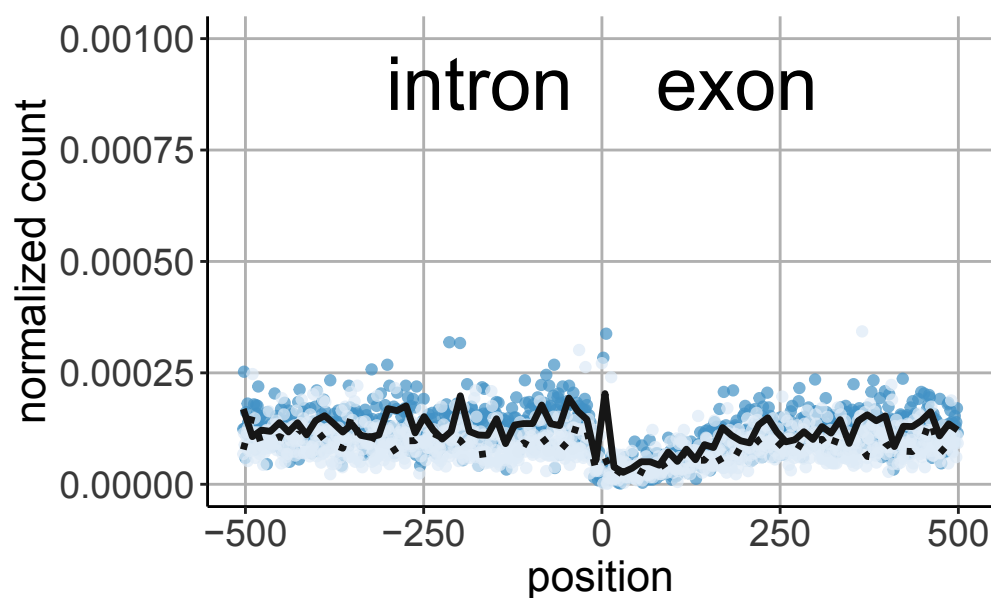

KHDRBS3-UAAANNNNNNNUAAA

•• antisense — sense    • antisense • sense

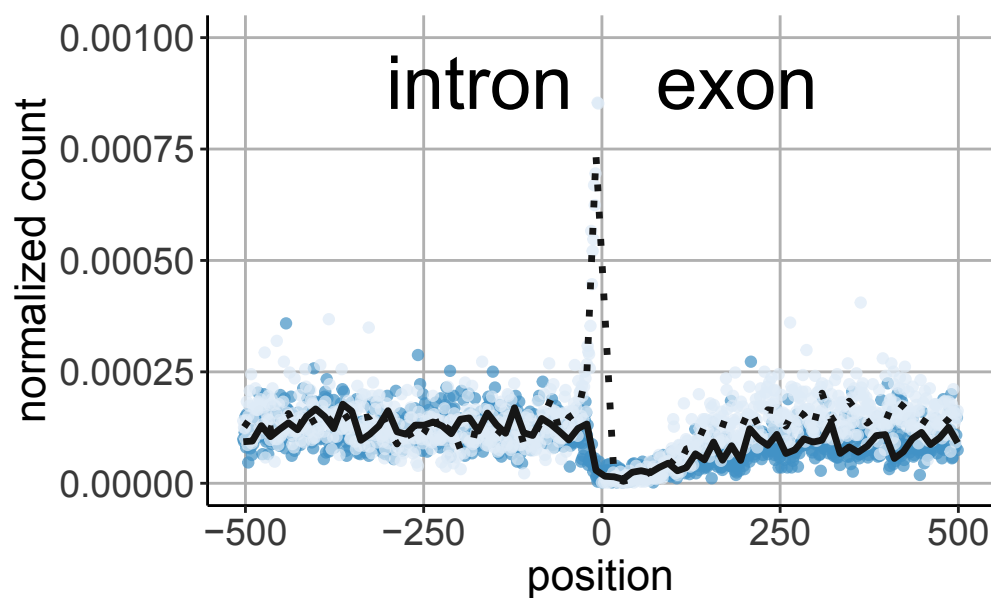

THUMPD1-UUCGUGGCUUG

•• antisense — sense    • antisense • sense

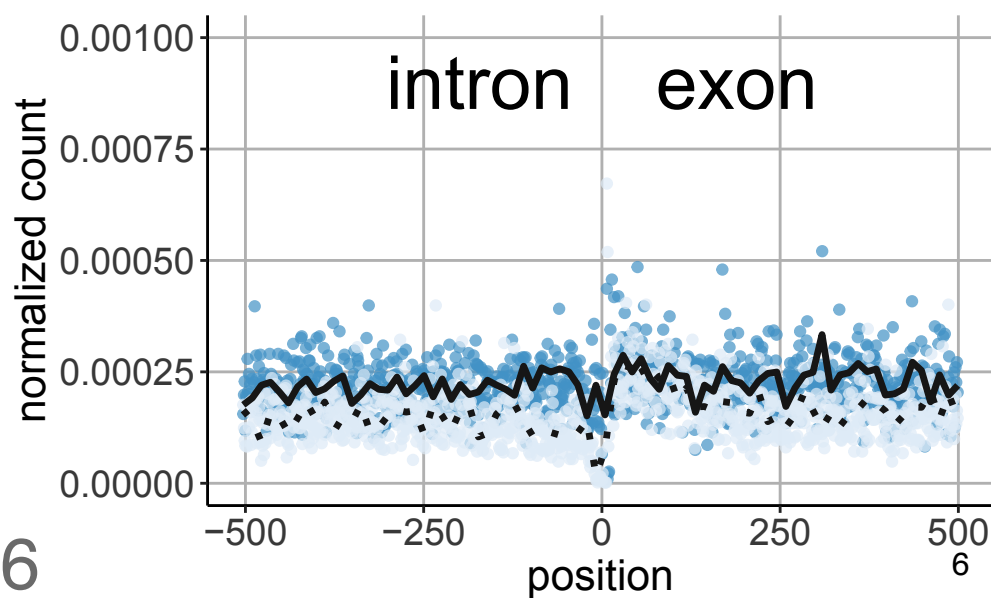

acceptor

THUMPD1-WGCGCGGUYUU

•• antisense — sense    • antisense • sense

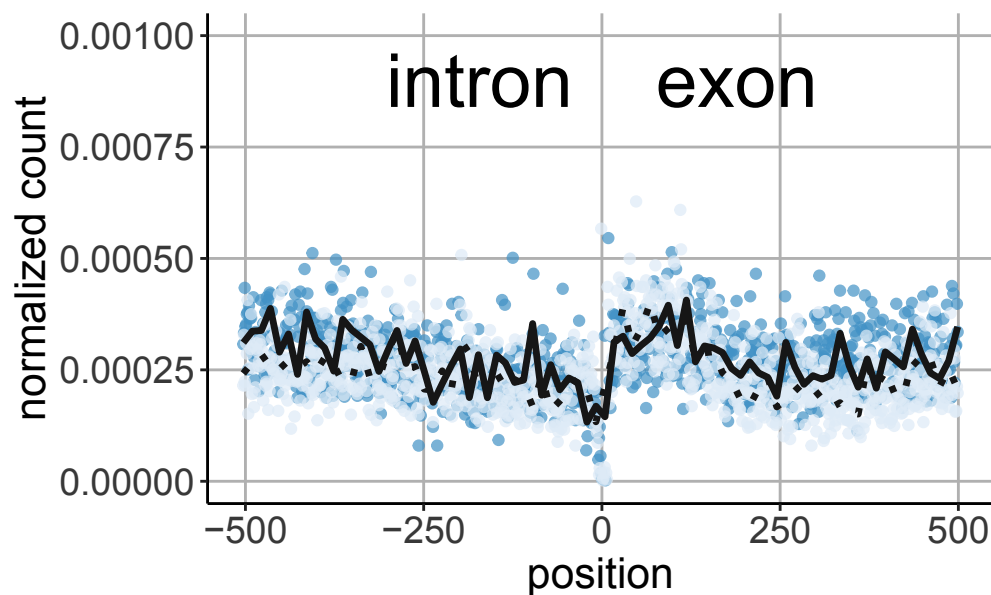

ZFR\_4-GGCACGGAUG

•• antisense — sense    • antisense • sense

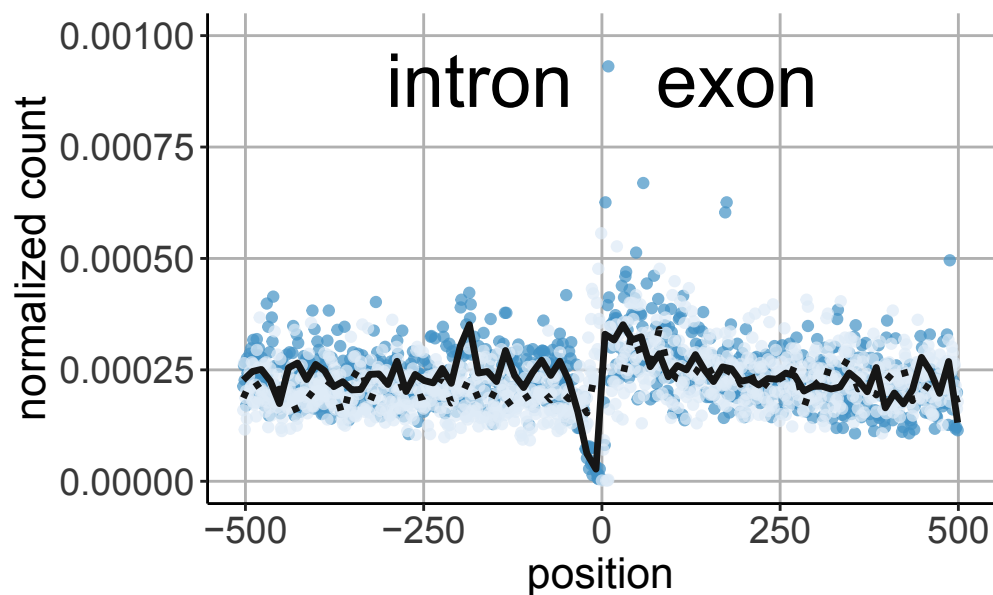

ZFR\_4-UUGCCGGAUGYCGU

•• antisense — sense    • antisense • sense

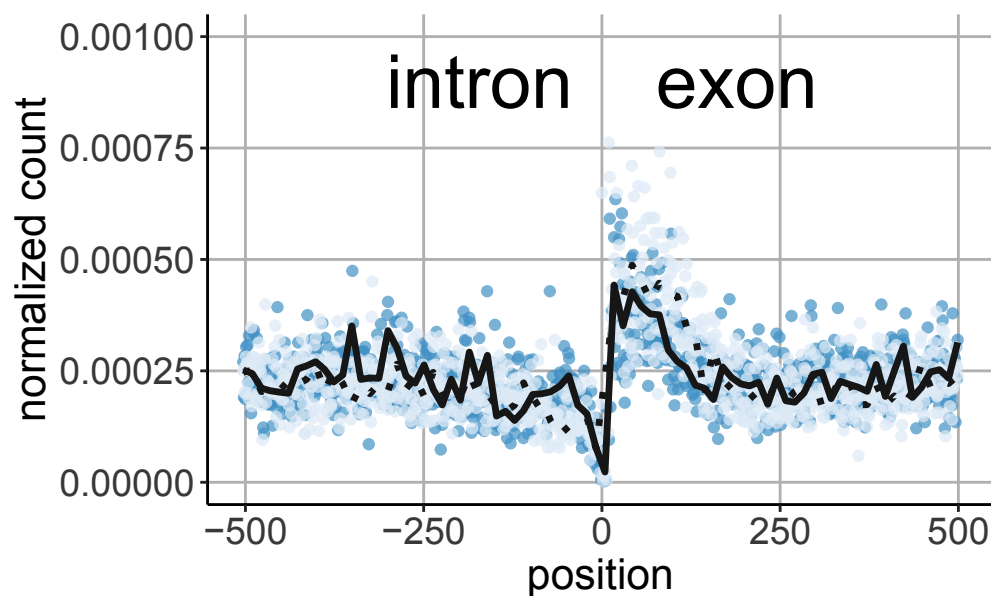

PCBP1-UCCUUNNCCUU

•• antisense — sense    • antisense • sense

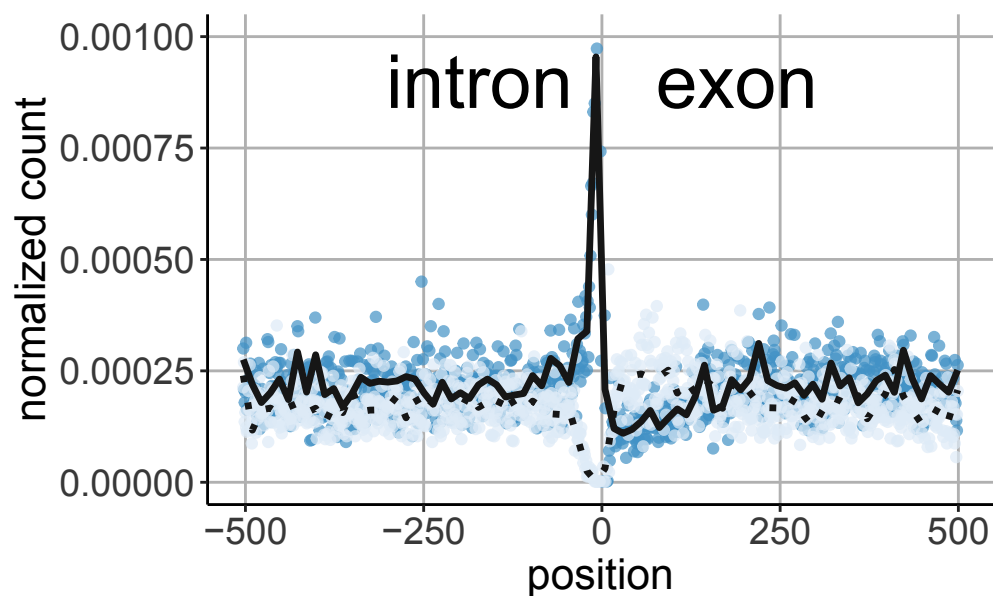

HNRNPA3-UAGGUAAGGG

•• antisense — sense    • antisense • sense

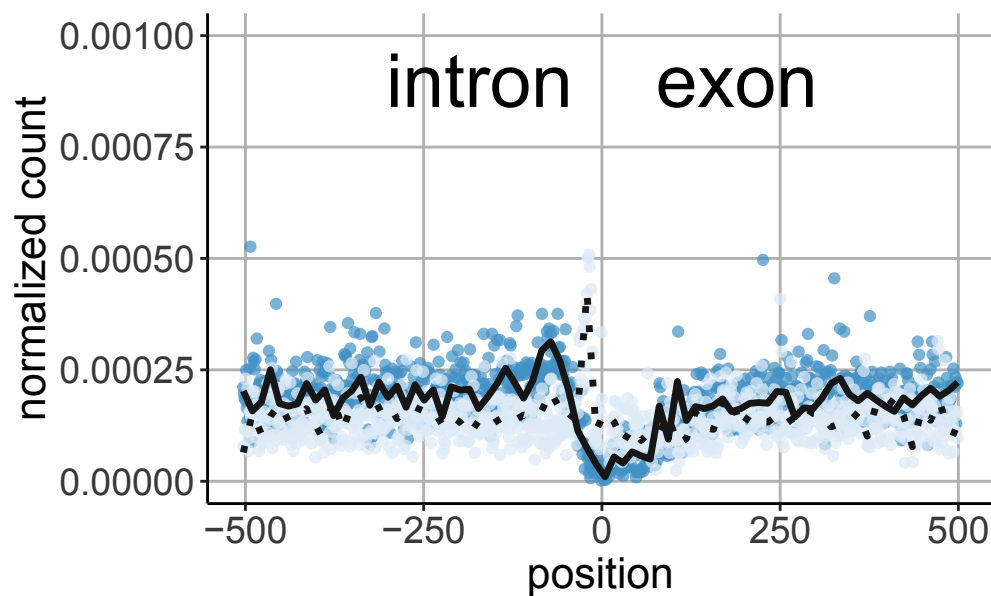

RBM38-KKGUGUGUGUGUKK

•• antisense — sense    • antisense • sense

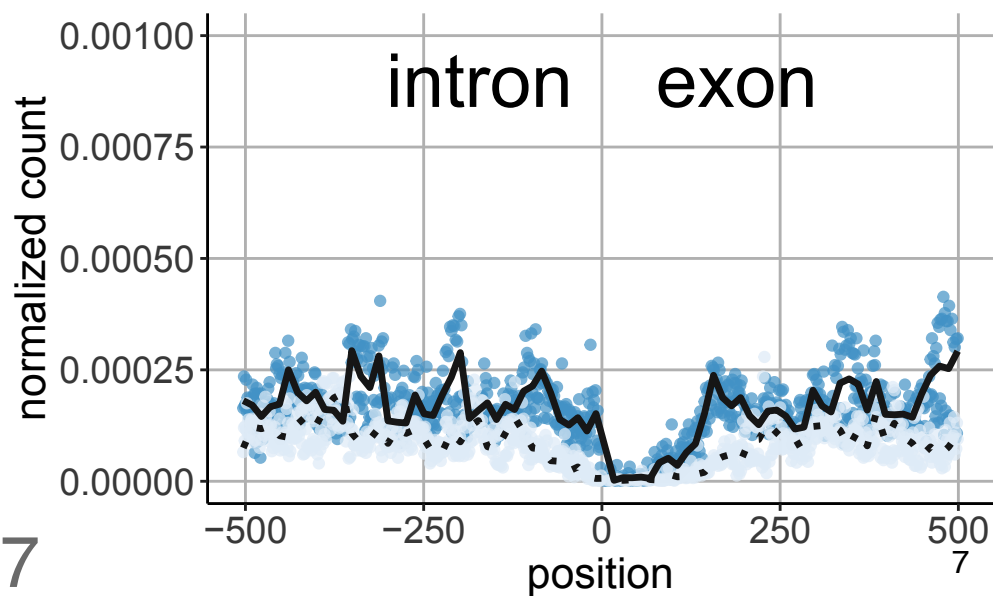



acceptor

MEX3D-UNURUUUAUU

RBPM2-CACAGNGCACA

• antisense — sense • antisense • sense

• antisense — sense • antisense • sense

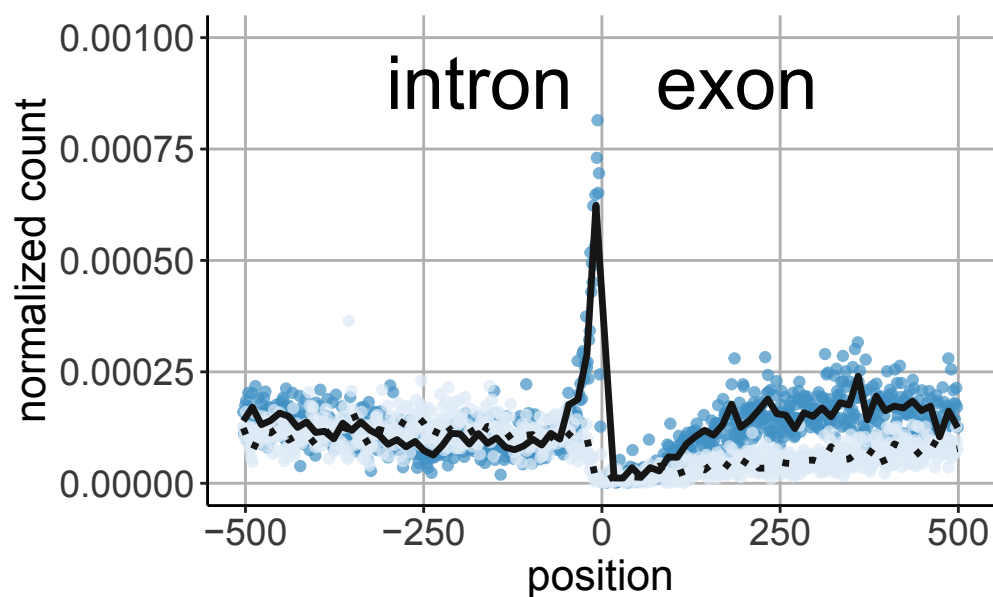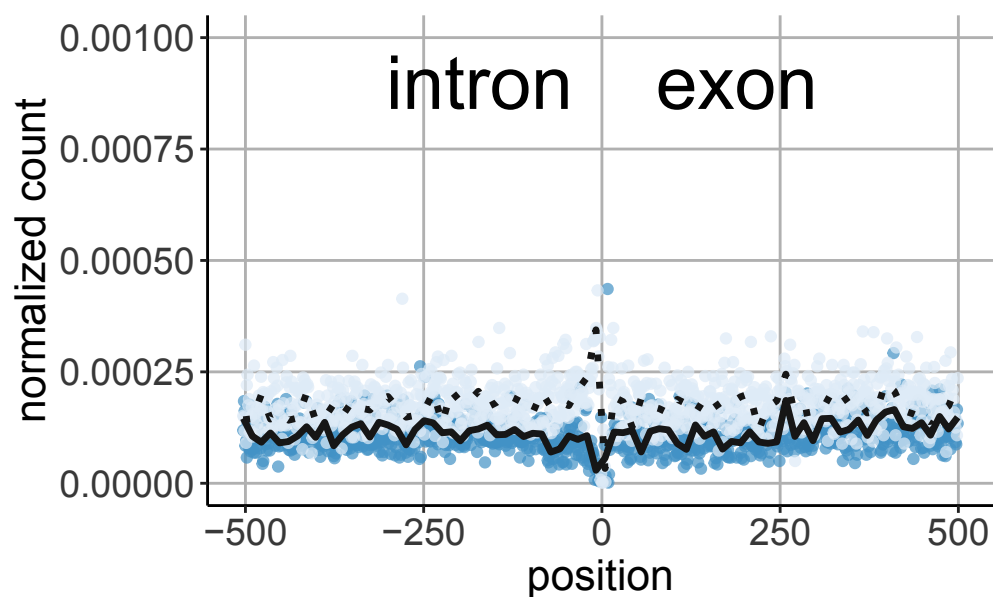

RBPM2-UCACRUGCACA

RBPM2-UGCACA

• antisense — sense • antisense • sense

• antisense — sense • antisense • sense

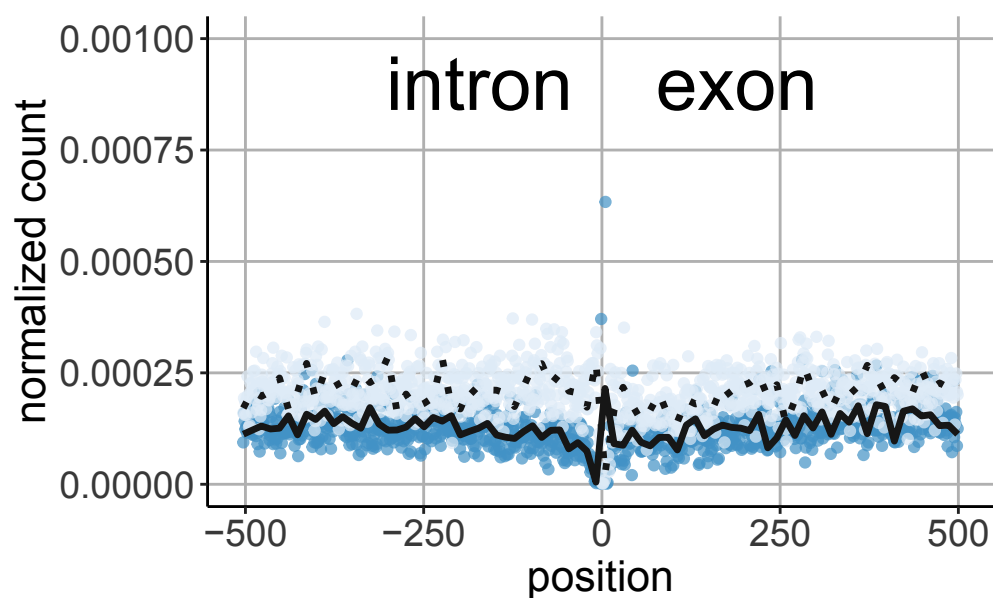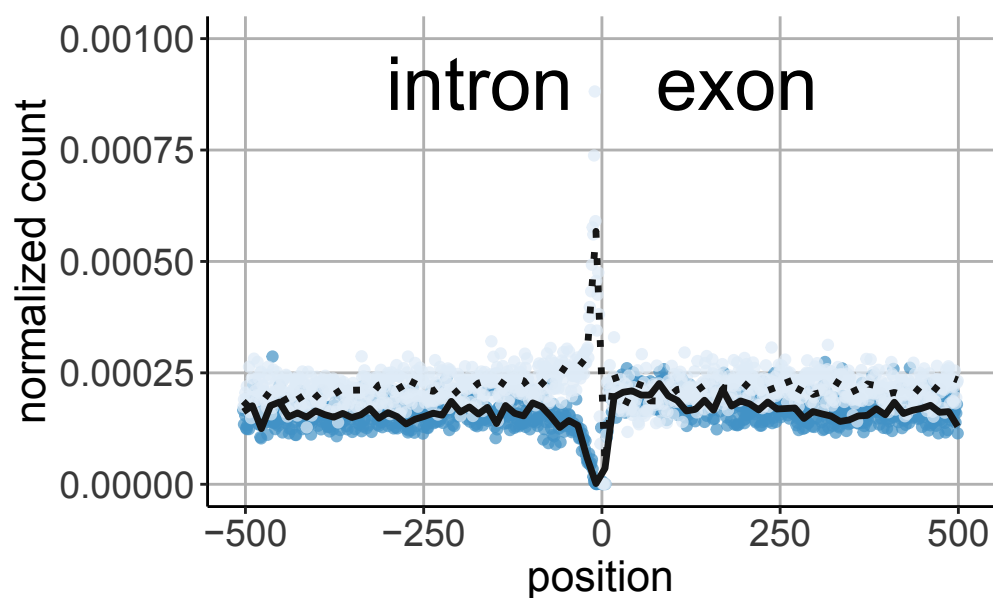

YBX2-GCCAUNNNAUCGC

YBX2-NUAACAUCNN

• antisense — sense • antisense • sense

• antisense — sense • antisense • sense

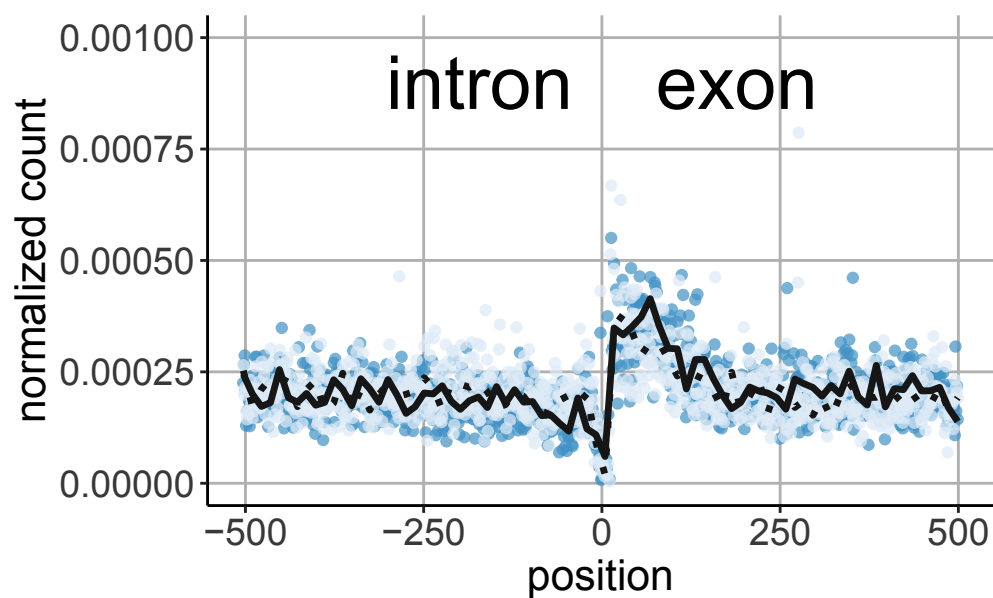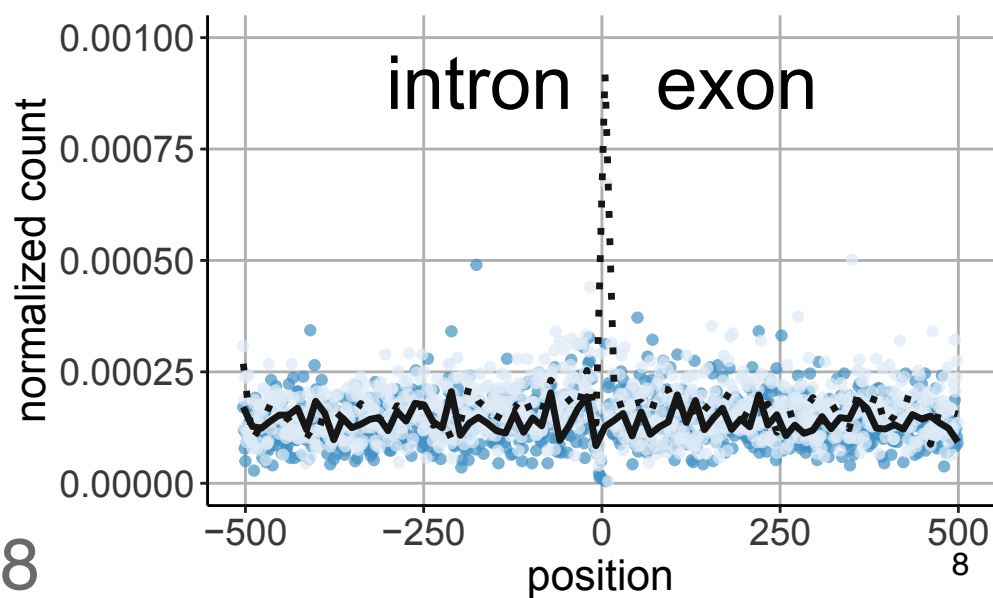

acceptor

CSTF2T-CGUAGCGUCU

• antisense — sense • antisense • sense

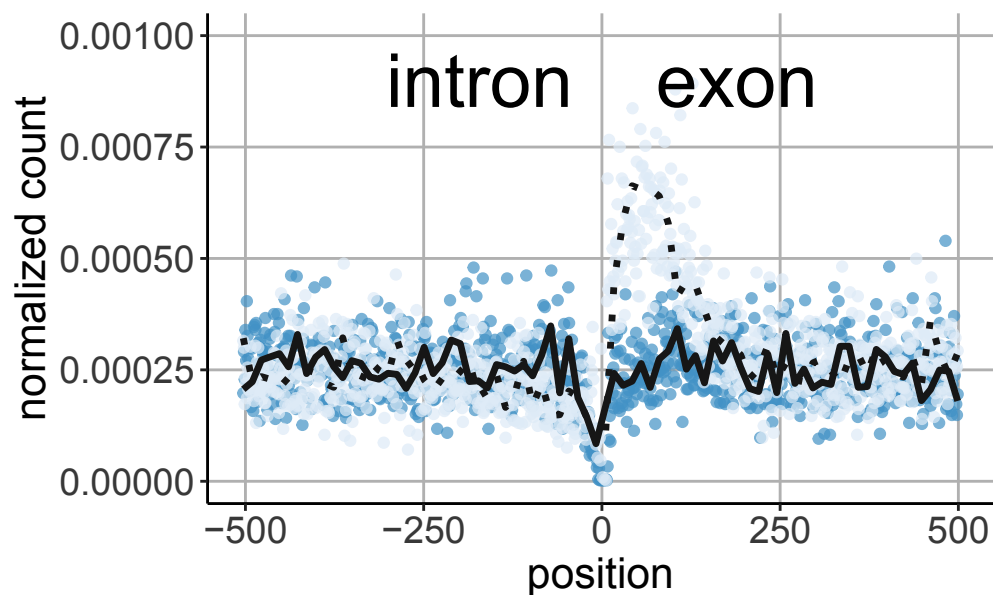

SNRNP70-GNUCANGNNG

• antisense — sense • antisense • sense

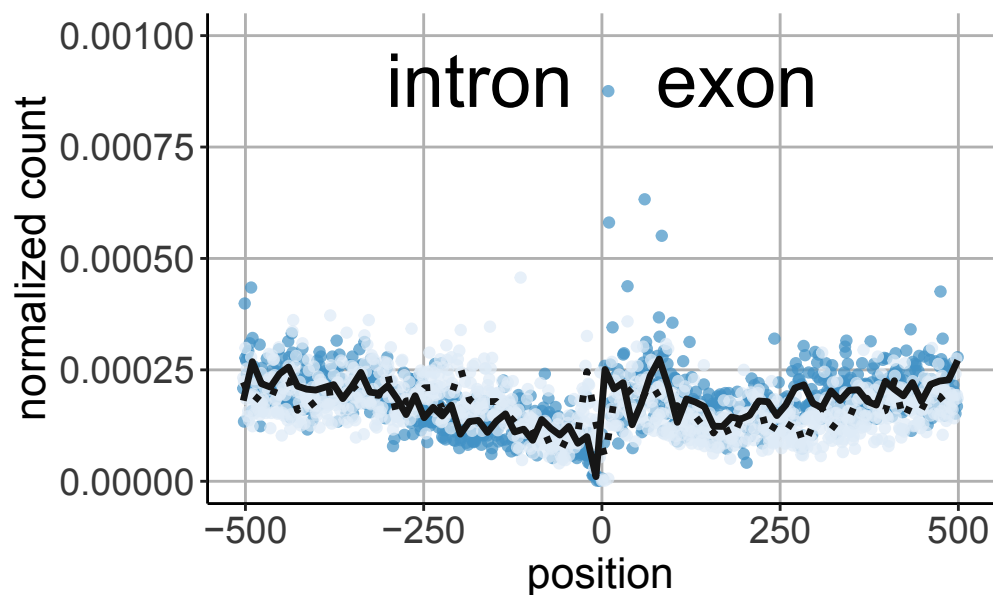

SNRNP70-GUUCAAGGUG

• antisense — sense • antisense • sense

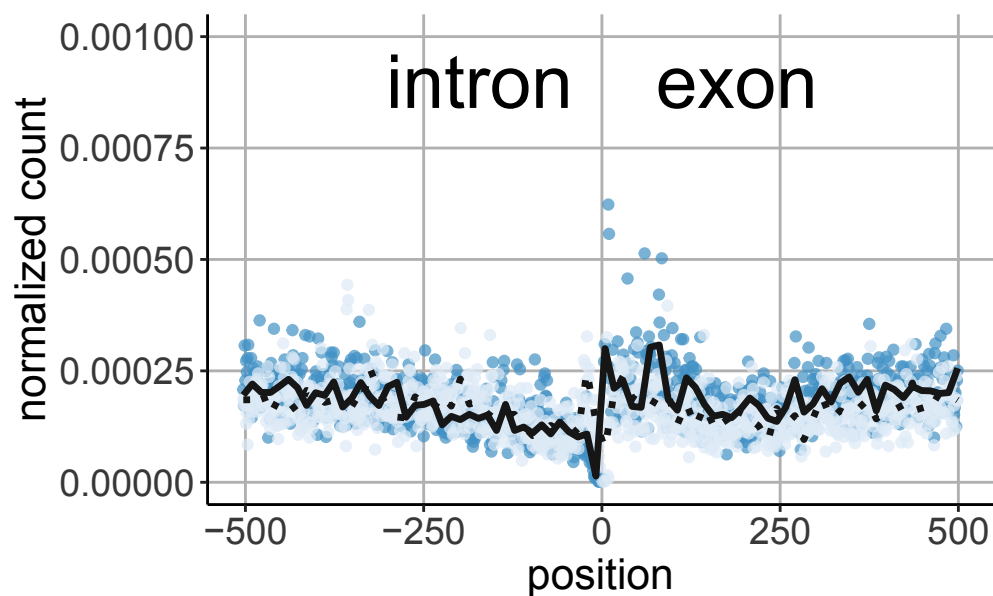

DAZ4-GYUCUAGUUAGYAUC

• antisense — sense • antisense • sense

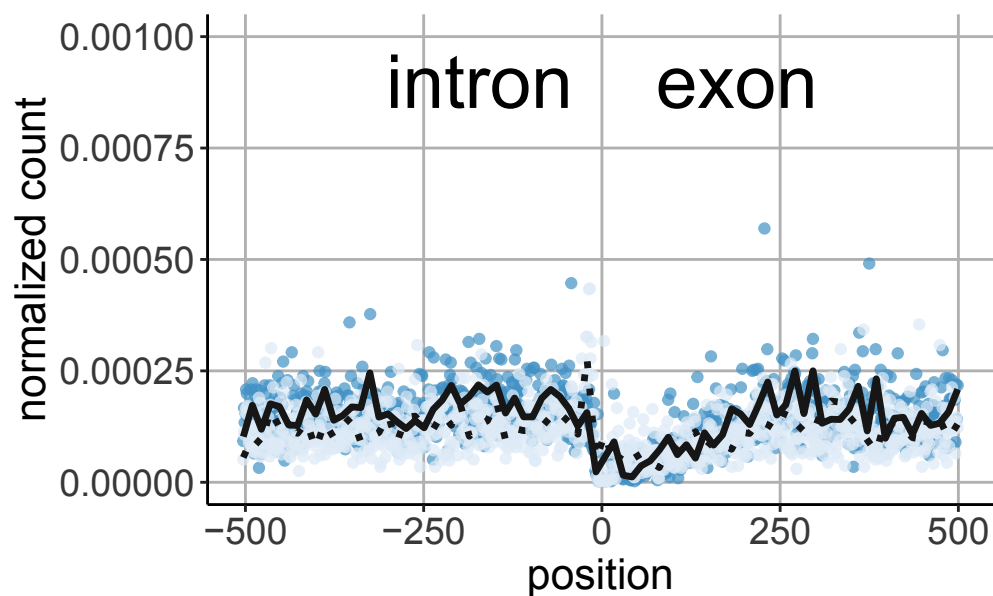

IGF2BP1-CAGNUWCA

• antisense — sense • antisense • sense

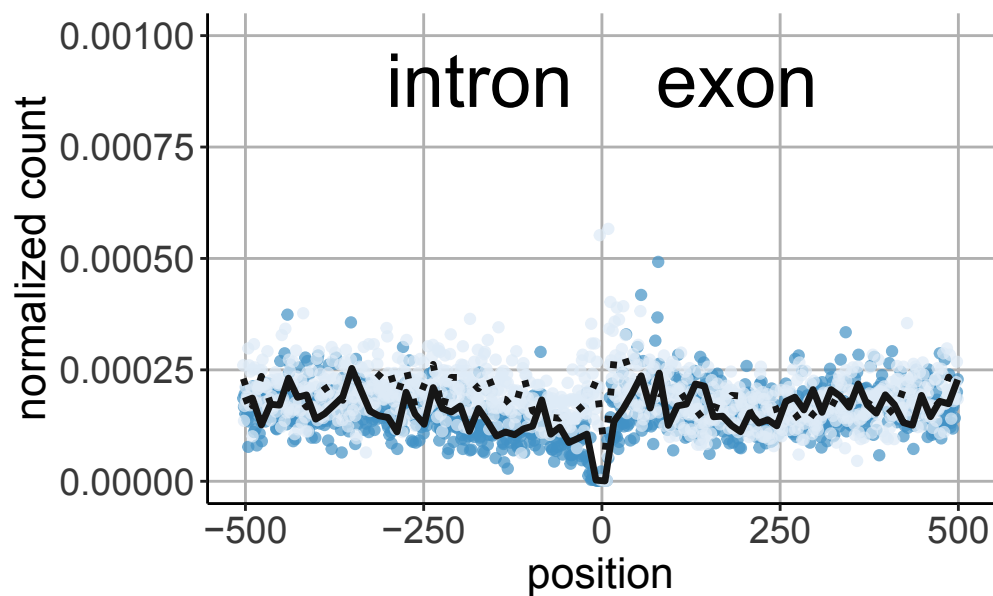

HEXIM2-NGCGACGGKN

• antisense — sense • antisense • sense

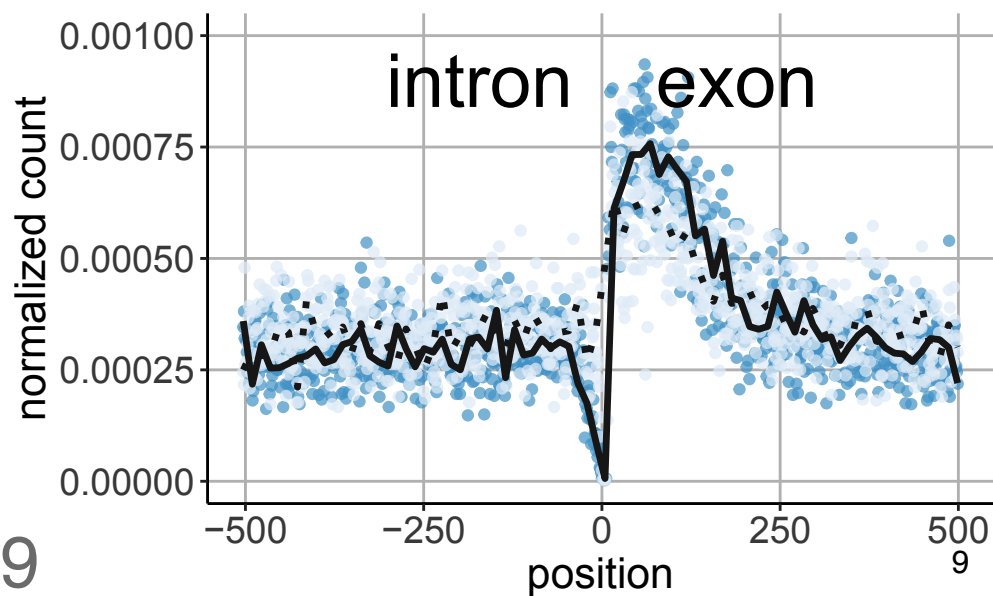

acceptor

YBX1-NUAACAUCGGG

•• antisense — sense • antisense • sense

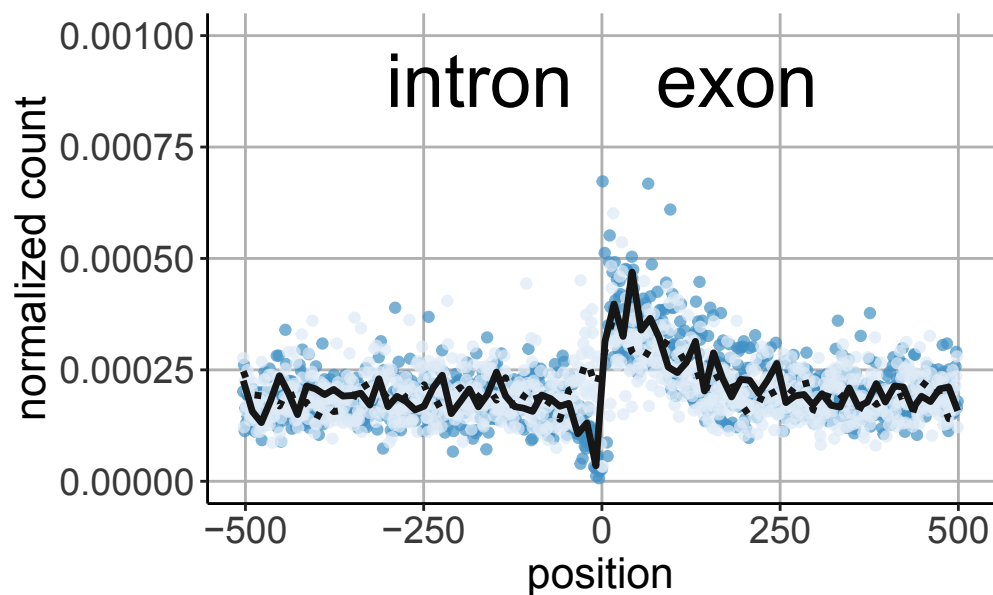

RBM24-GUGUGNGUGUG

•• antisense — sense • antisense • sense

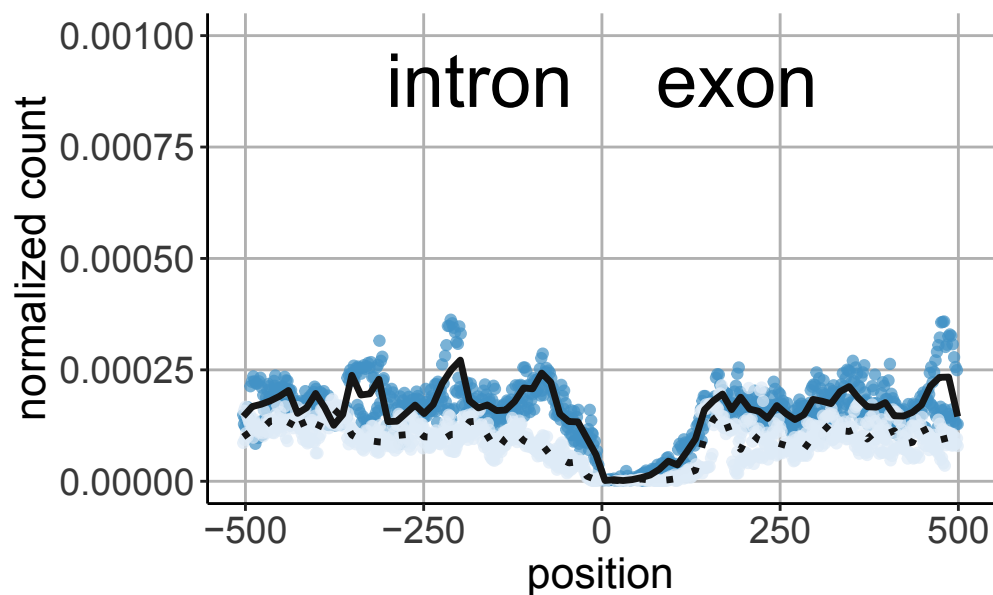

CSDA-UAACAUCA

•• antisense — sense • antisense • sense

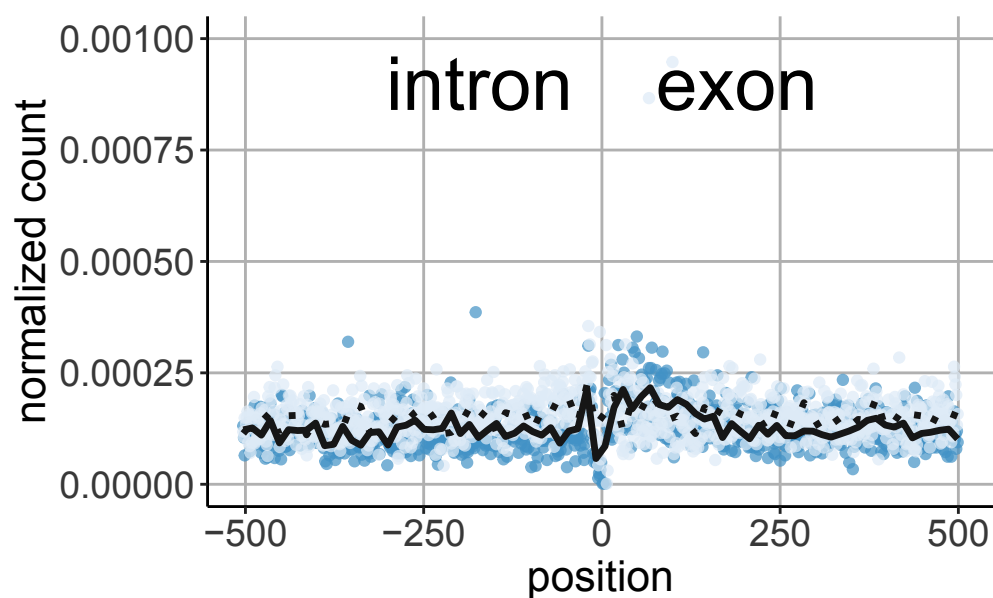

HNRNPA1L2-NUAGGUUAGGGW

•• antisense — sense • antisense • sense

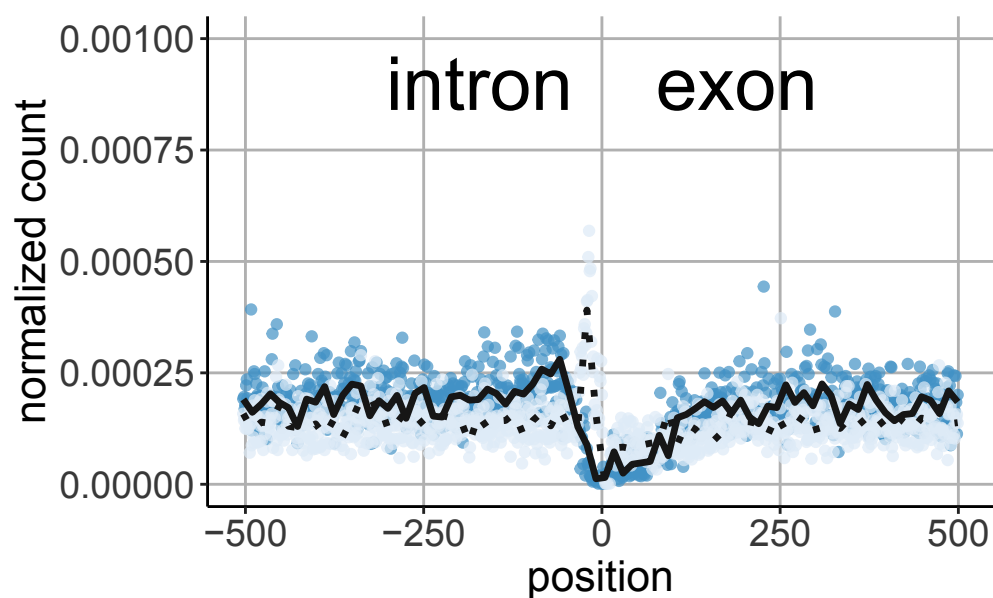

ZC3H12B-NGCGNCAGUCGGUAGCN

•• antisense — sense • antisense • sense

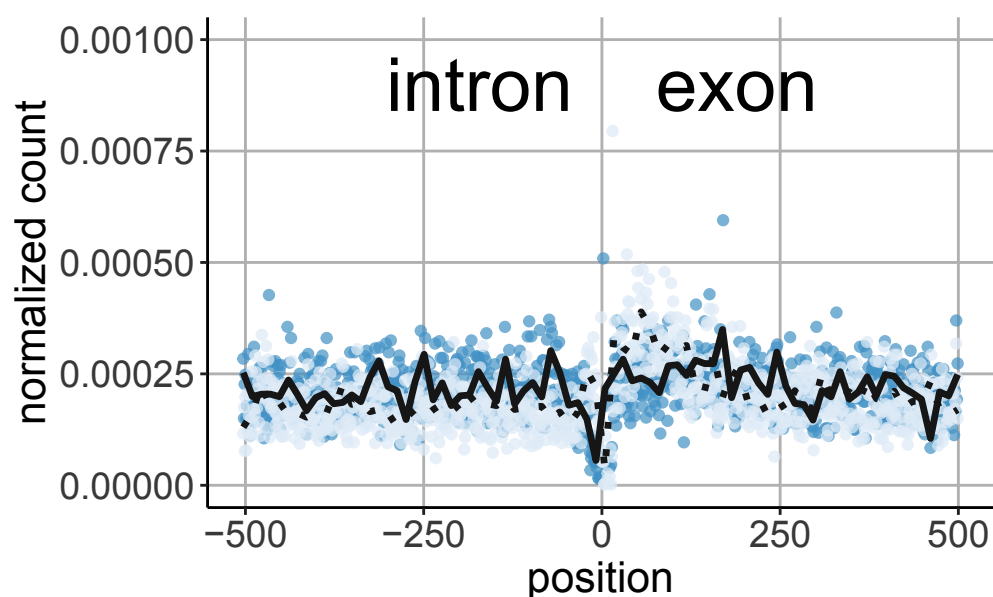

ZC3H12A-NUUGCCAWAGUKU

•• antisense — sense • antisense • sense

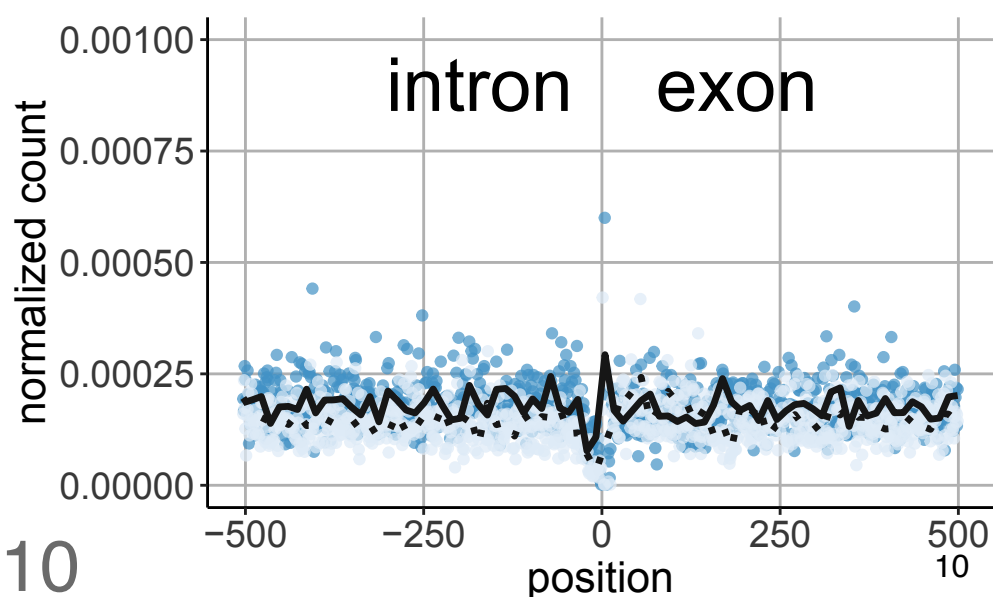

acceptor

DAZAP1-UUAGGUUAGG

• antisense — sense • antisense • sense

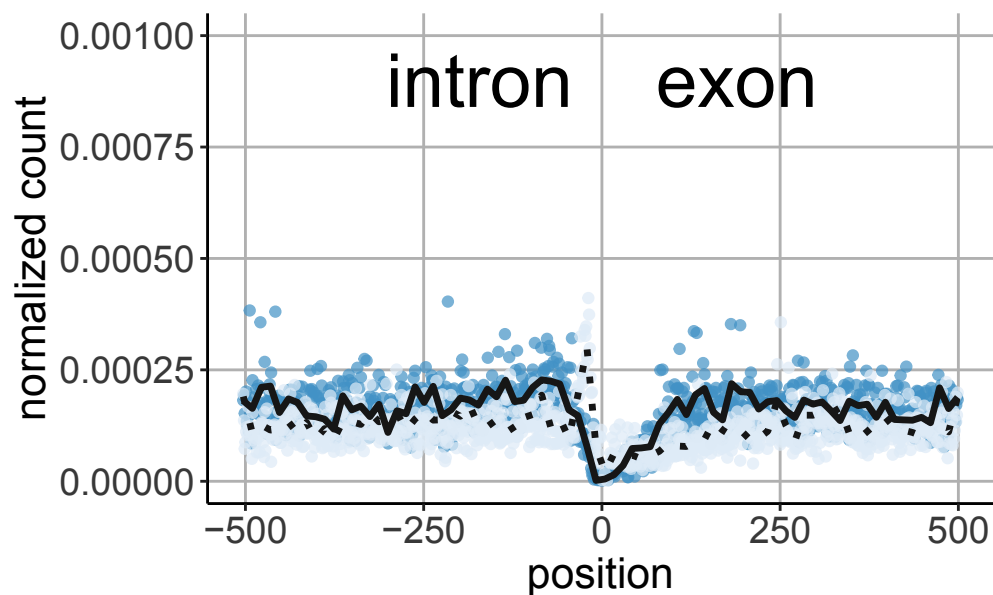

CARHSP1-GCCAUGAUGAU

• antisense — sense • antisense • sense

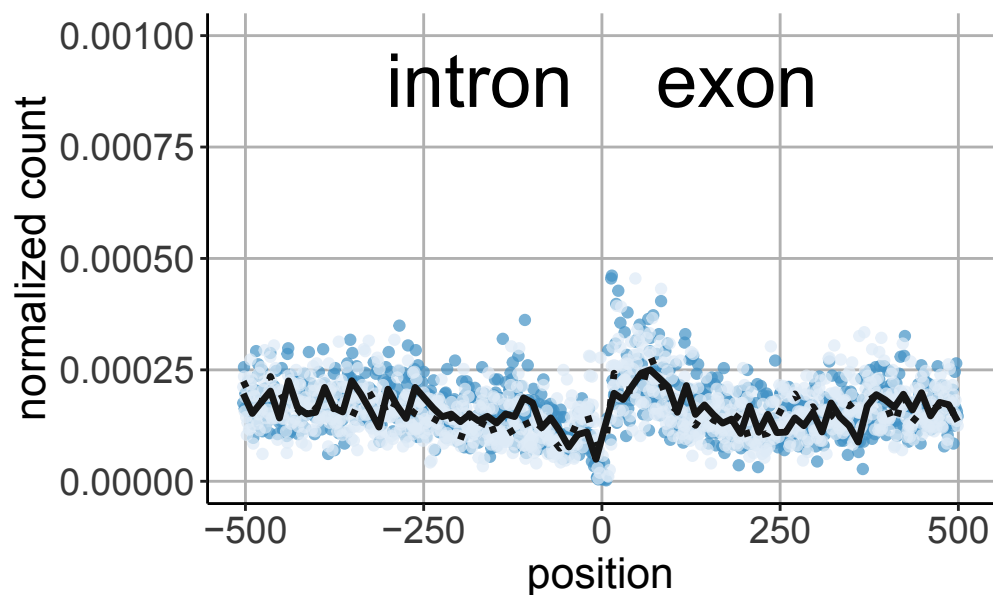

CARHSP1-UUGCCUUGUCCCGAU

• antisense — sense • antisense • sense

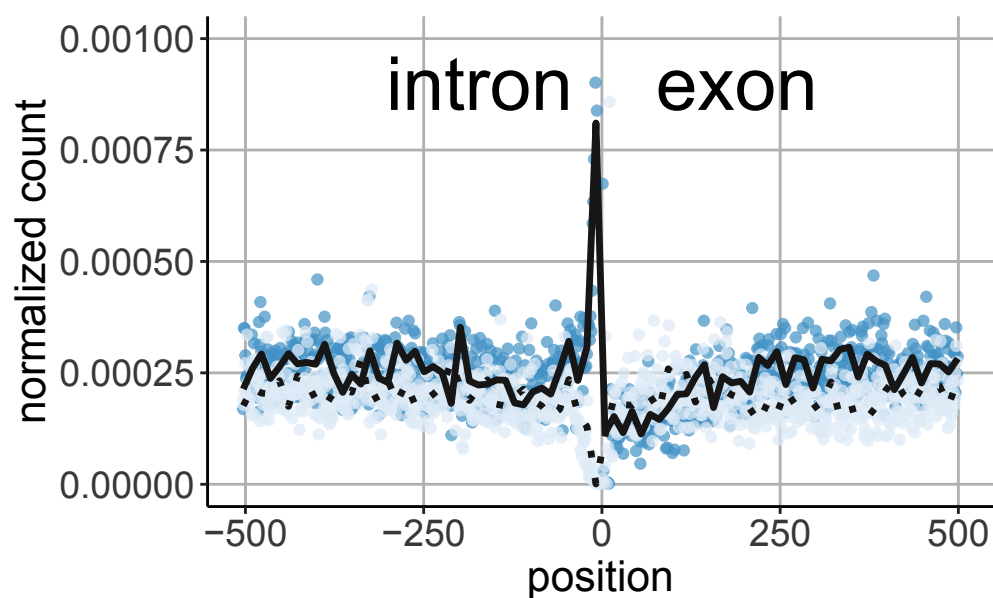

RNPC3-GGGUSUACGGGGU

• antisense — sense • antisense • sense

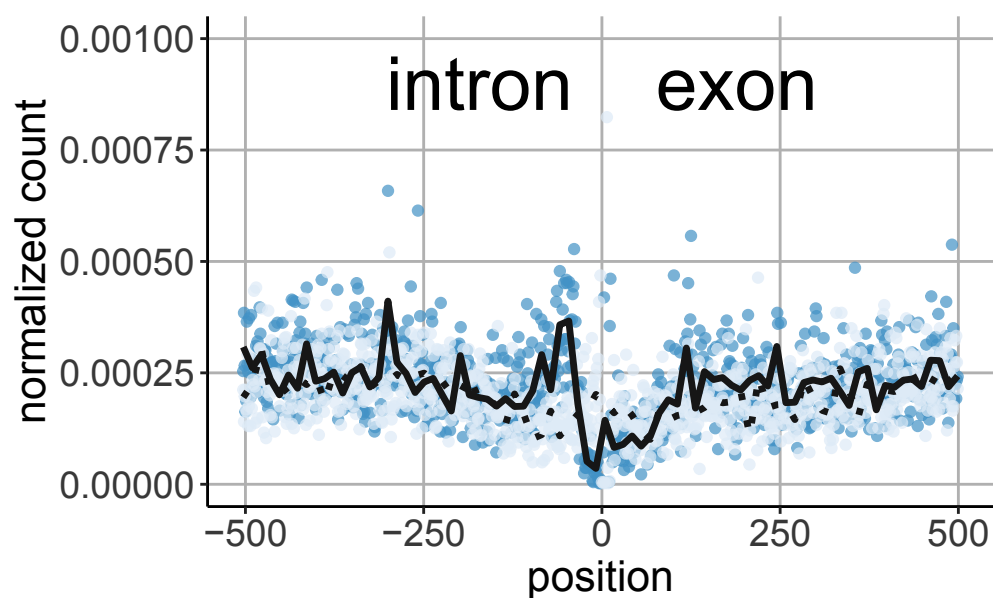

ELAVL1-UUUAUGNUUU

• antisense — sense • antisense • sense

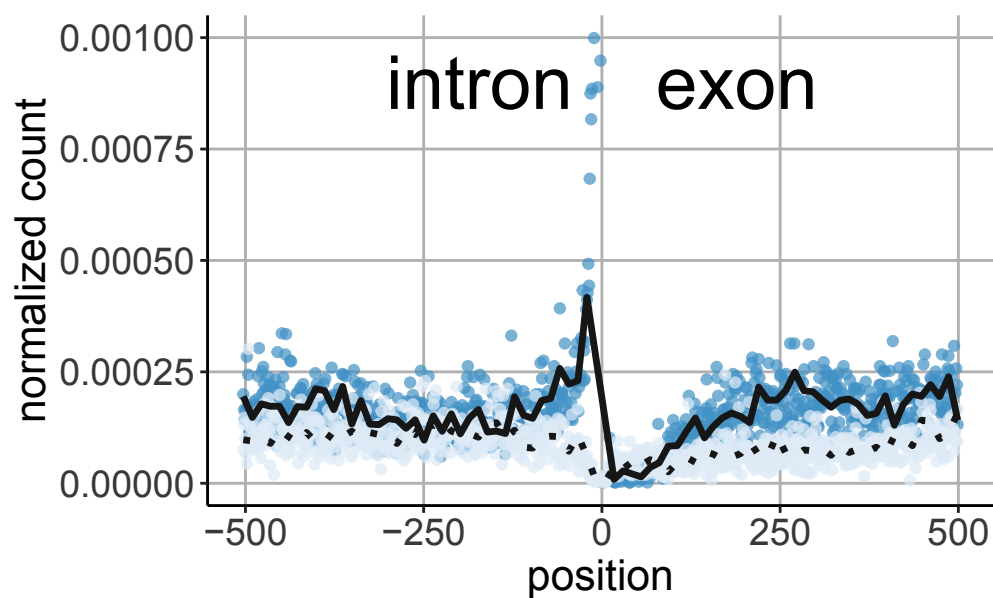

RBM46-GUGAUUG

• antisense — sense • antisense • sense

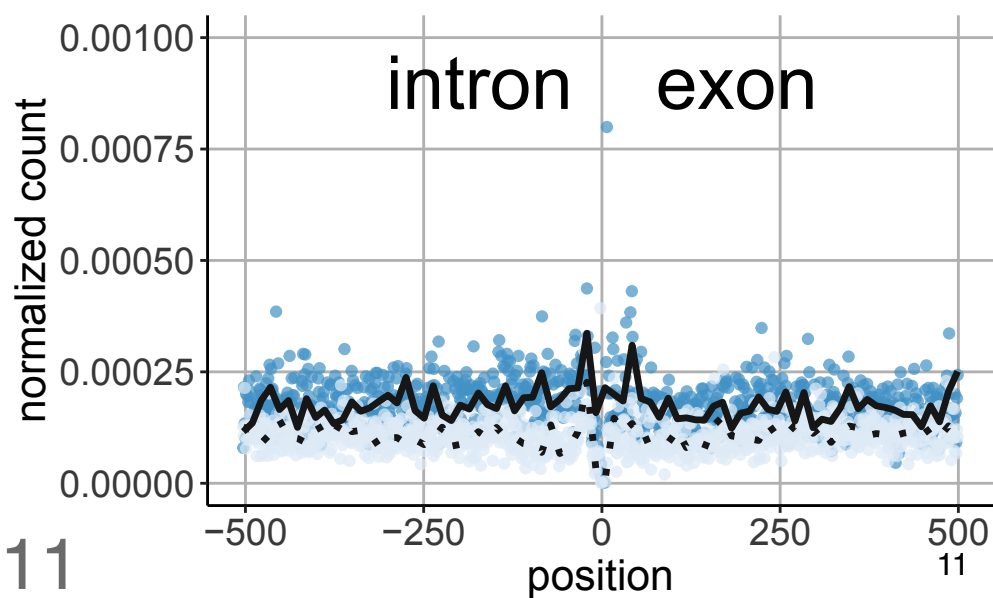

acceptor

ESRP1\_3-GGUGUGGUGU

•• antisense — sense    • antisense • sense

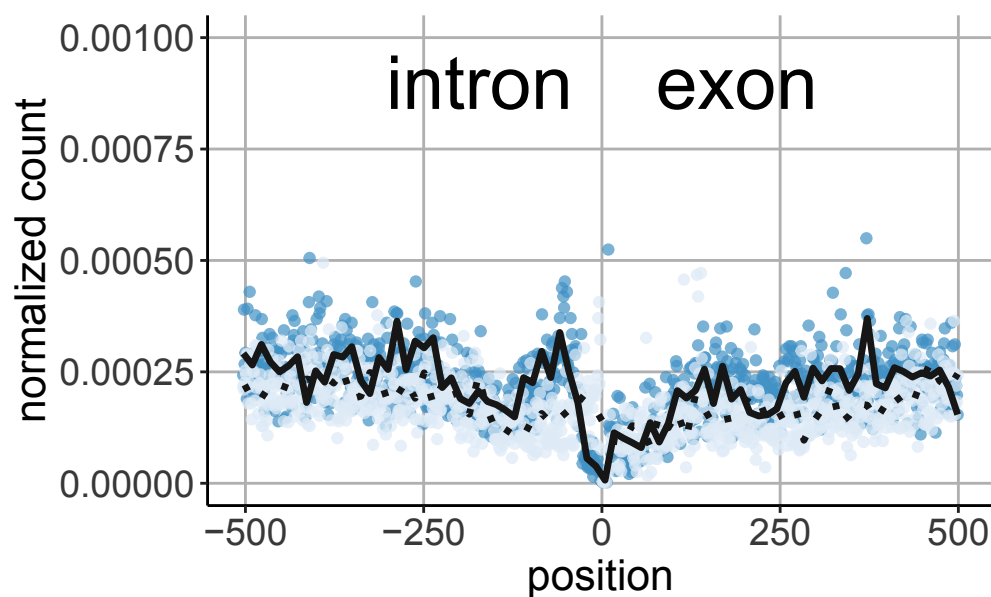

SNRPB2-GGGUGUGGCAC

•• antisense — sense    • antisense • sense

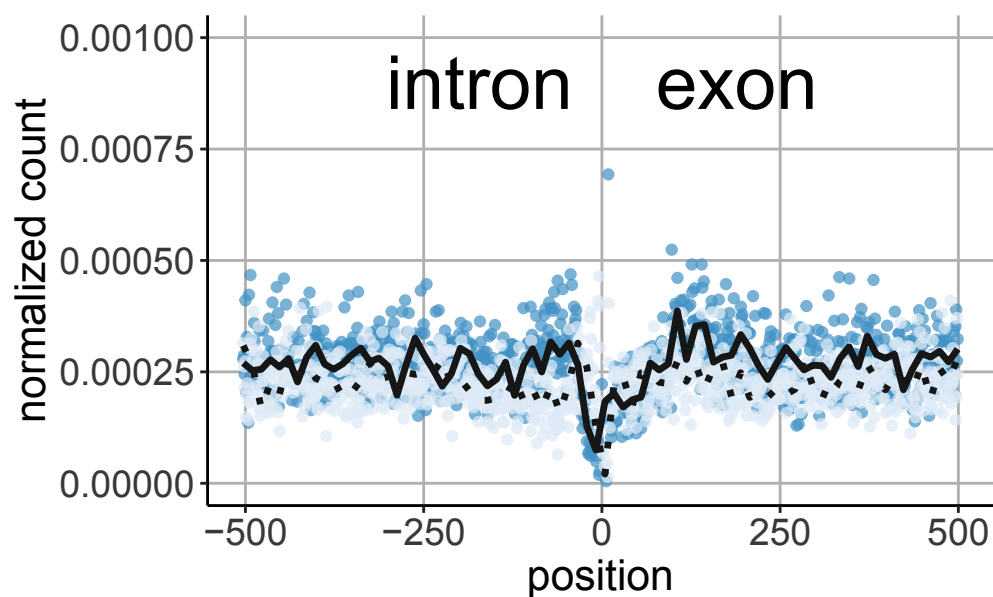

SNRPB2-NNCAUUGCACN

•• antisense — sense    • antisense • sense

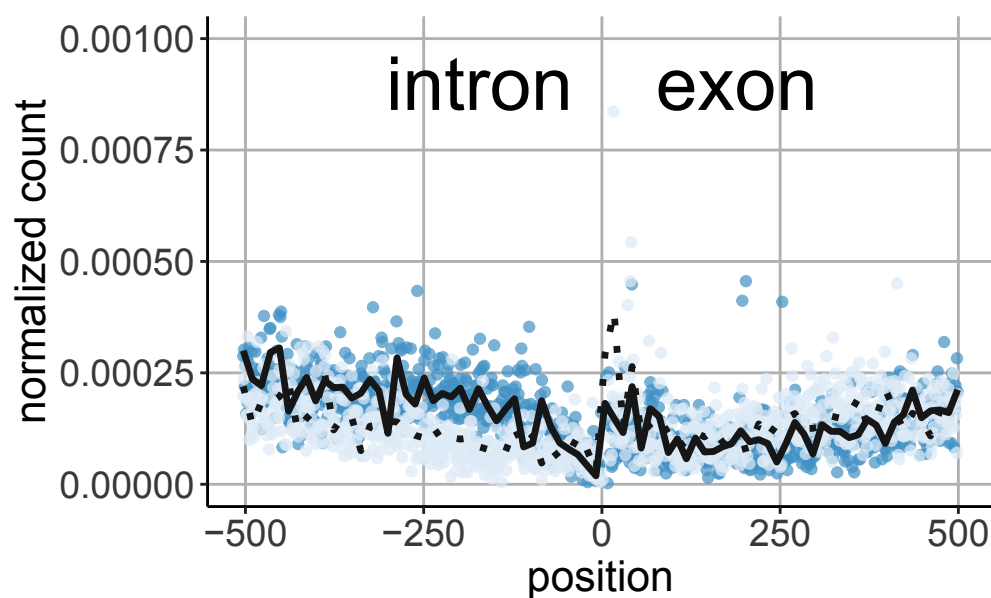

MEX3C-NNAGAGUUUAUNN

•• antisense — sense    • antisense • sense

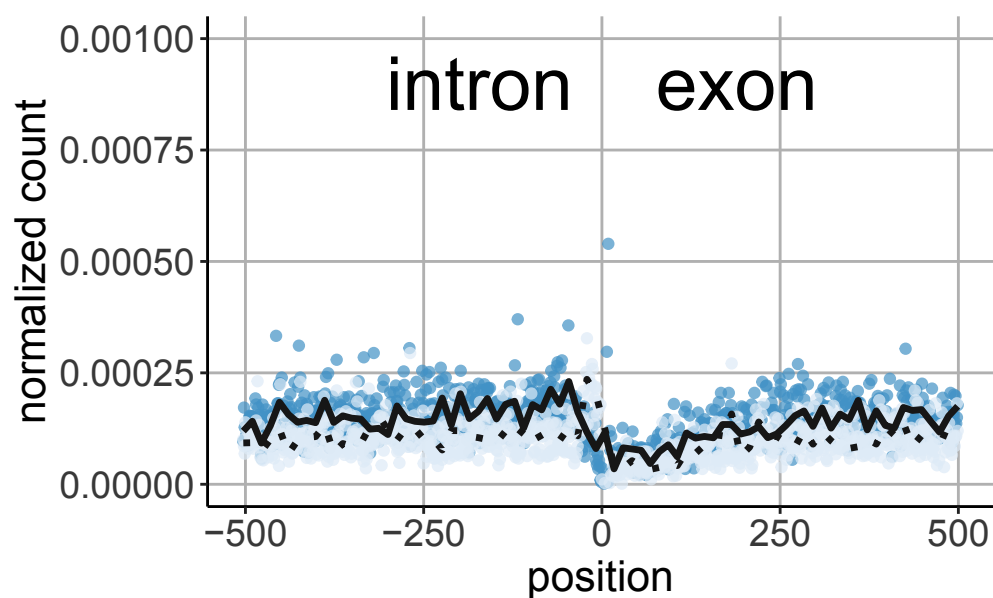

HNRNPA0-KUAGKUUAGGK

•• antisense — sense    • antisense • sense

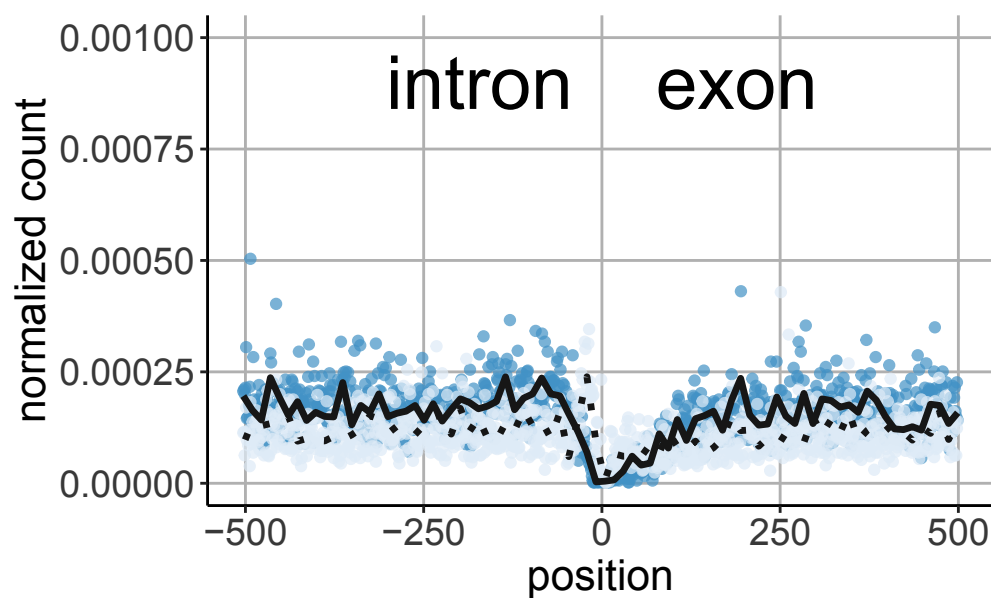

HNRNPA0-KUAGKUUUAGGK

•• antisense — sense    • antisense • sense

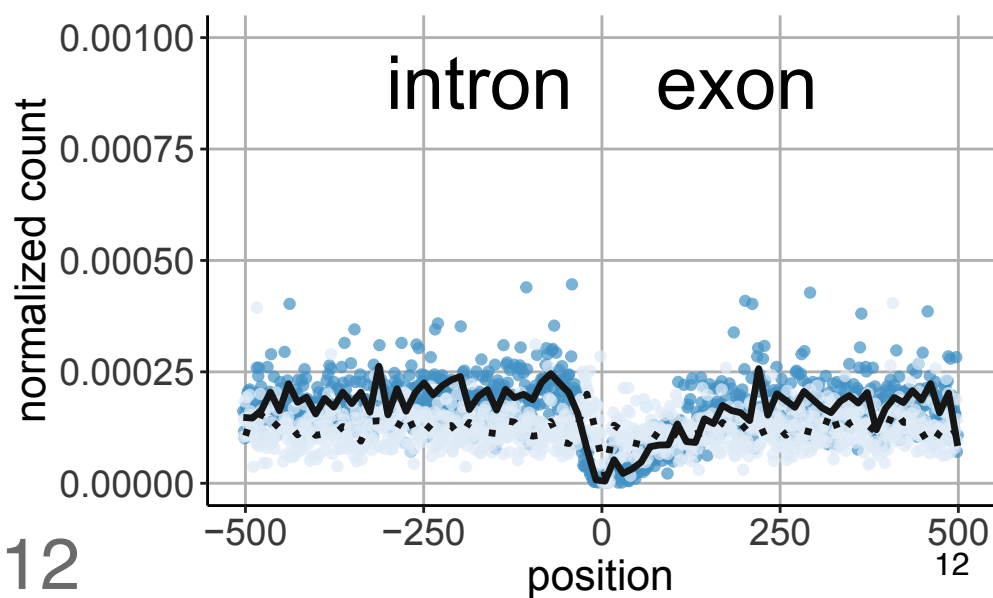

acceptor

SNRPA-CAUUGCACN

SNRPA-NUGCACR

•• antisense — sense • antisense • sense

•• antisense — sense • antisense • sense

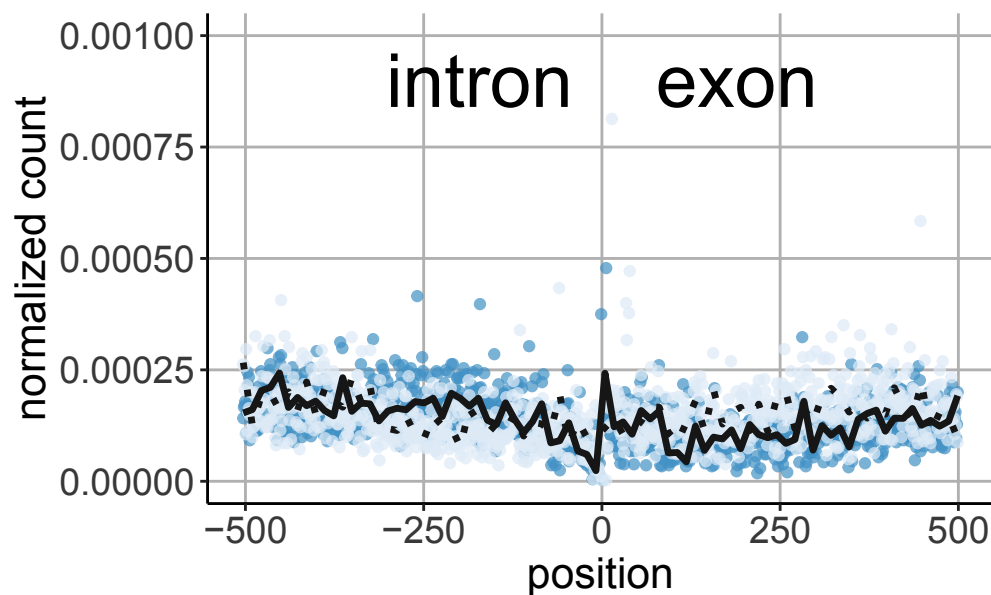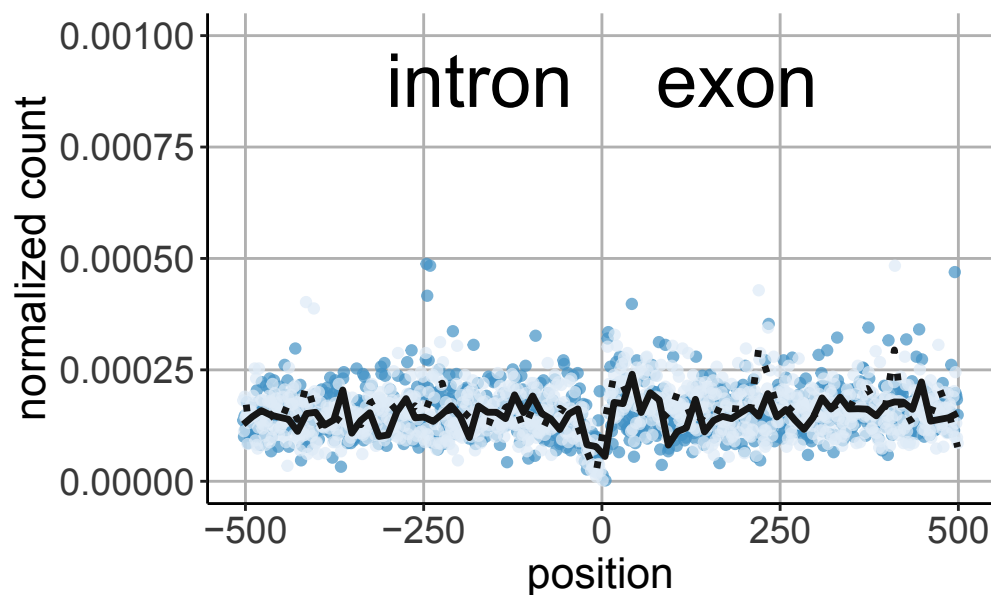

MEX3B\_3-UAGAGUUUUAU

MEX3B\_3-UAUUUUAU

•• antisense — sense • antisense • sense

•• antisense — sense • antisense • sense

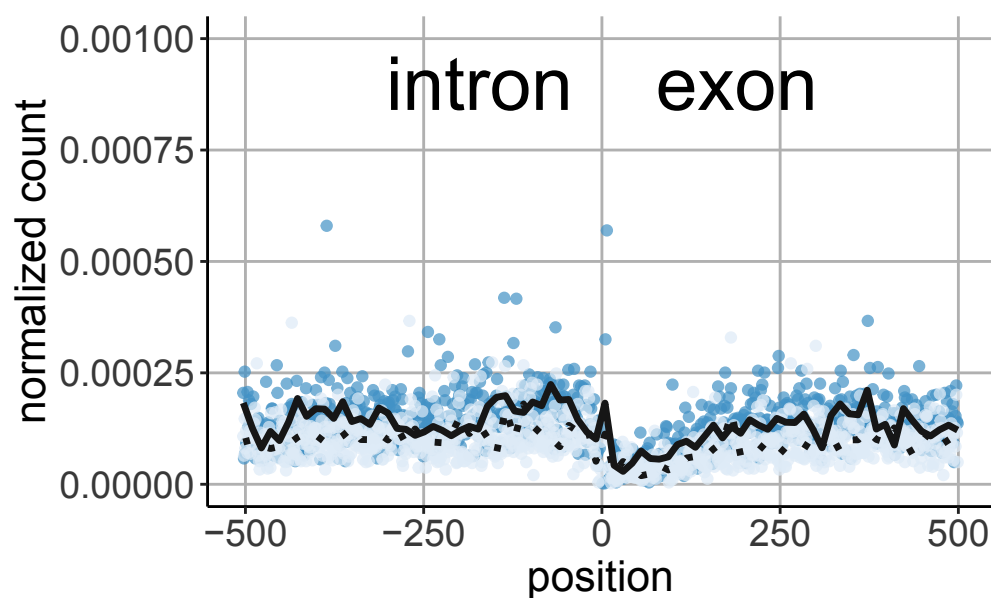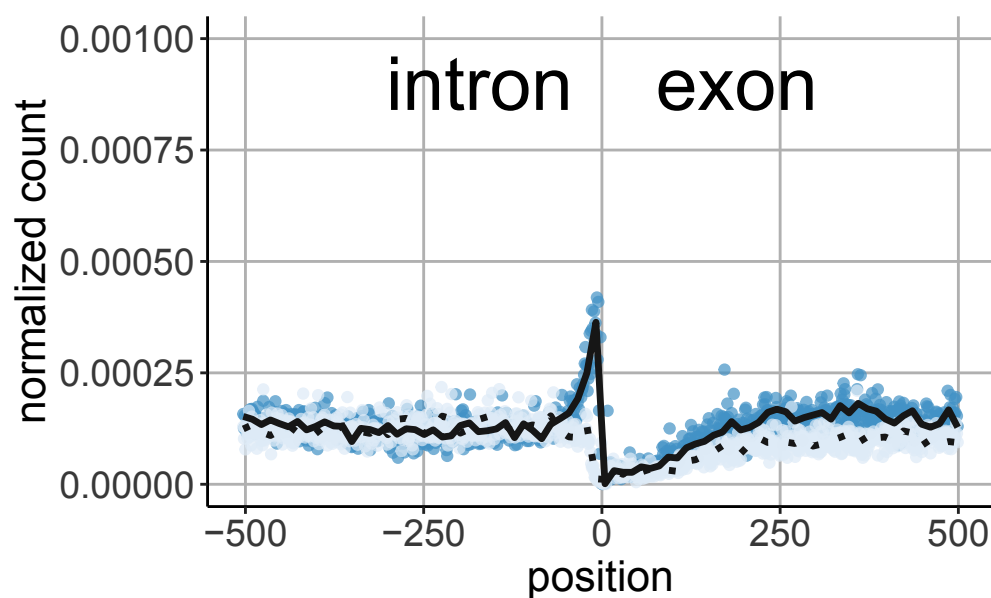

KHDRBS2-UAAACAAUAA

CELF3\_2-UGUGUNUGUGU

•• antisense — sense • antisense • sense

•• antisense — sense • antisense • sense

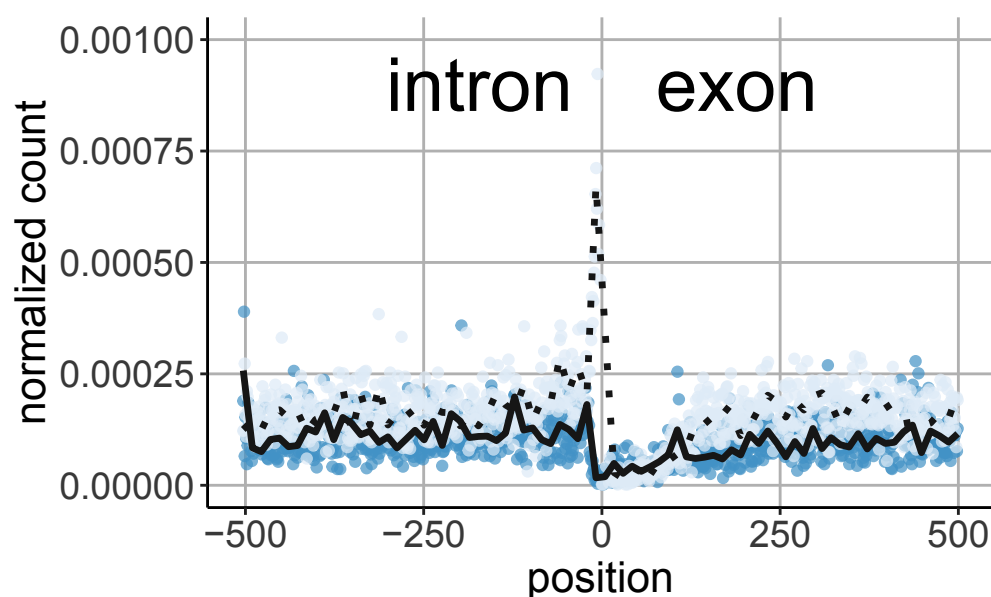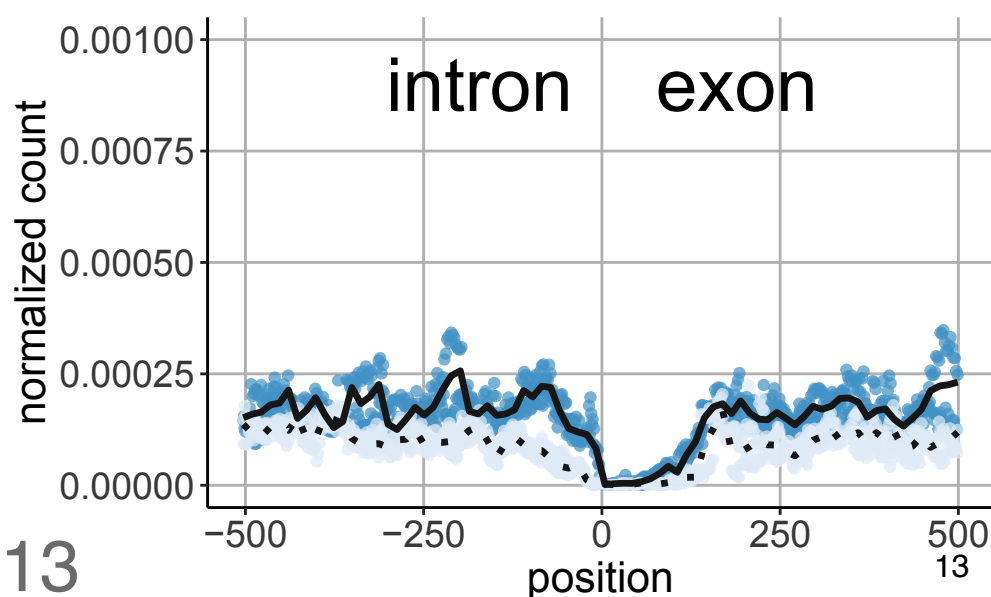

acceptor

RNPC3-GGGDDGGGDKUACKKGGK

•• antisense — sense    • antisense • sense

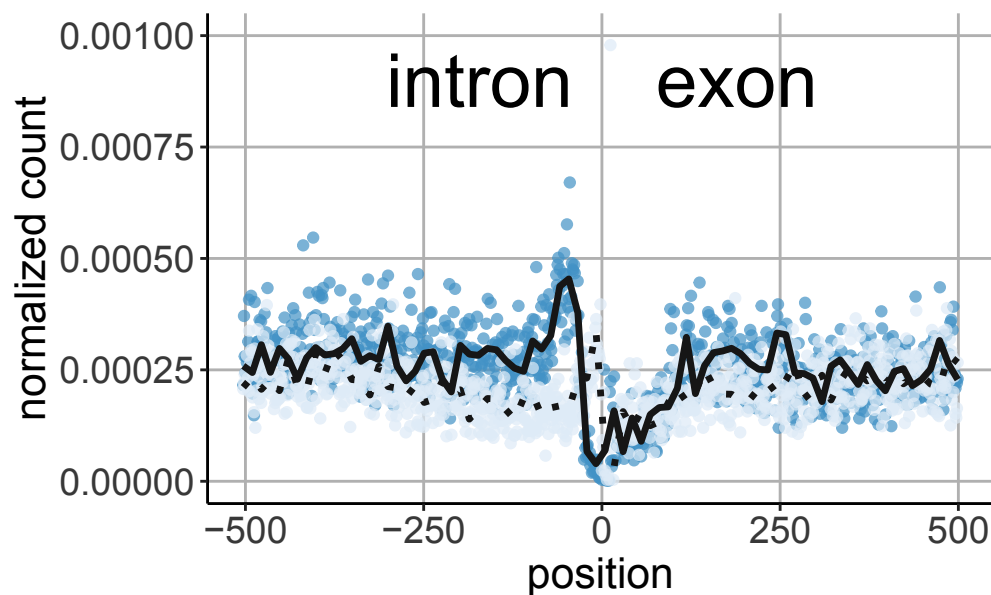

RBM14-UGCGUCG

•• antisense — sense    • antisense • sense

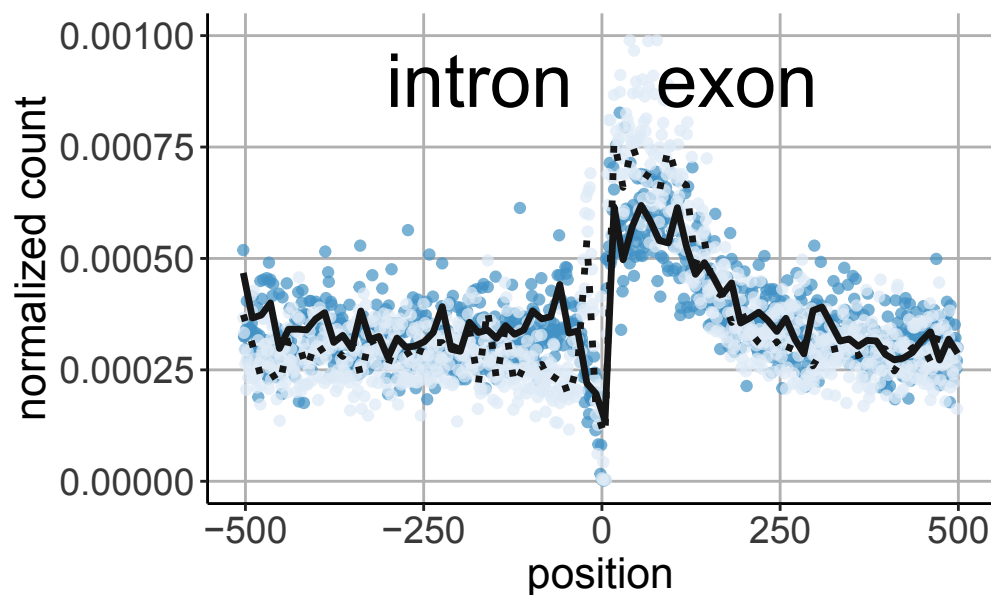

CELF4-UGUGUUGUGU

•• antisense — sense    • antisense • sense

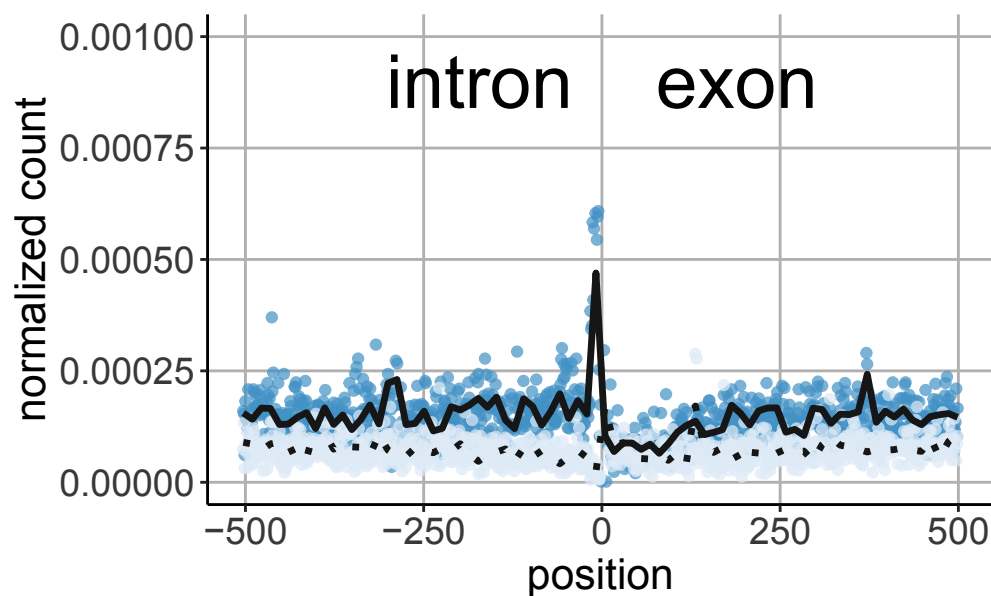

ZRANB2-NNNGGUAAGGUNN

•• antisense — sense    • antisense • sense

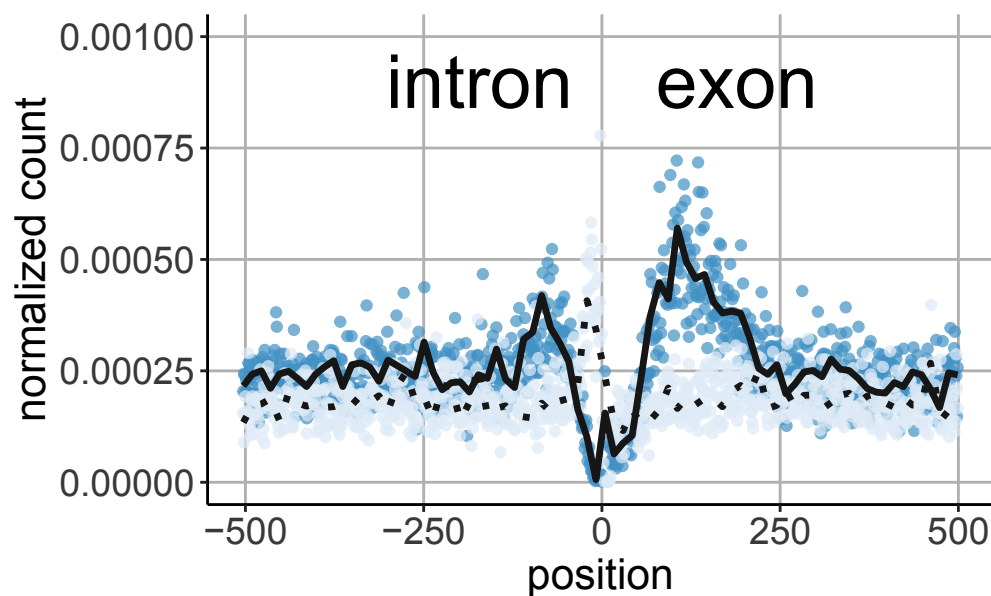

RBM4-CGGGGURUGN

•• antisense — sense    • antisense • sense

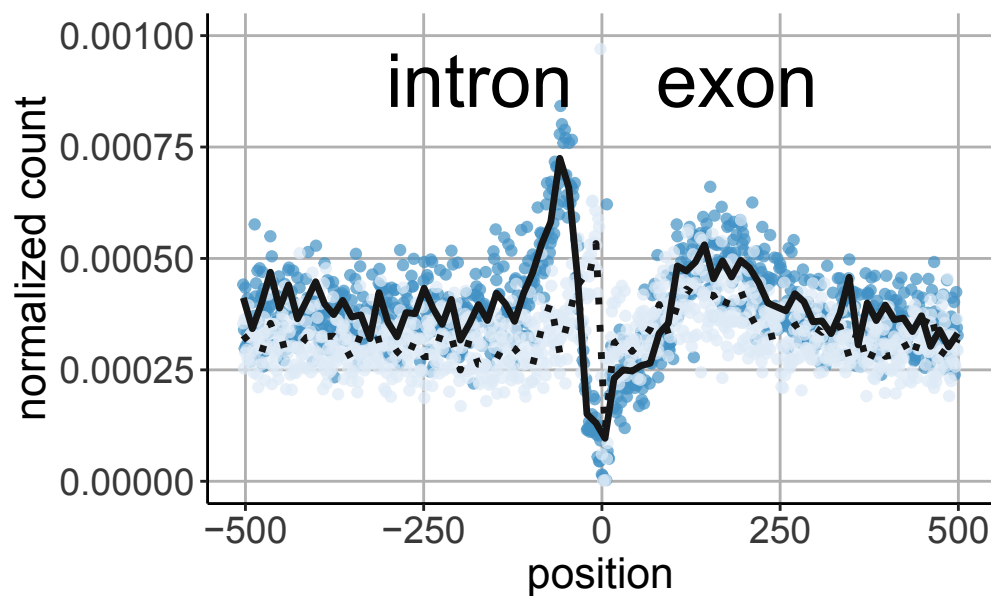

RBPMS-NAGGCACR

•• antisense — sense    • antisense • sense

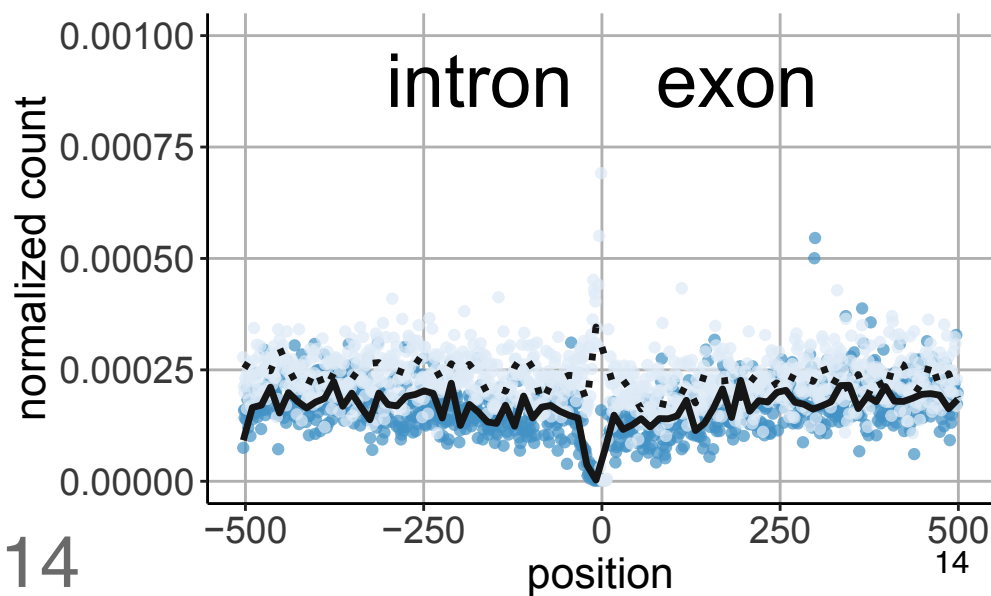

acceptor

RBPMS-UCACGNGCACN

• antisense — sense • antisense • sense

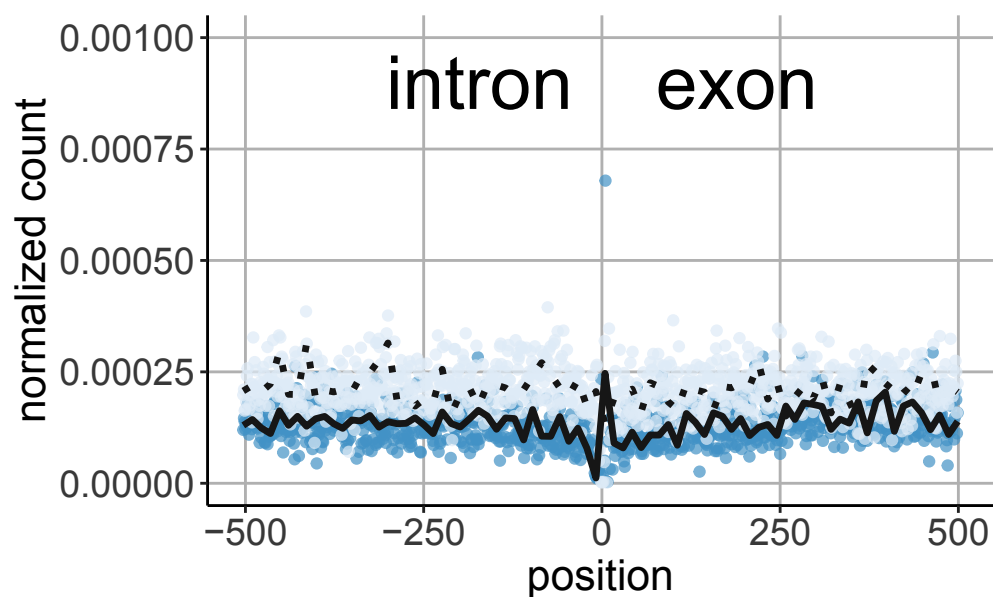

CELF1\_2-UGUGUNUGUGU

• antisense — sense • antisense • sense

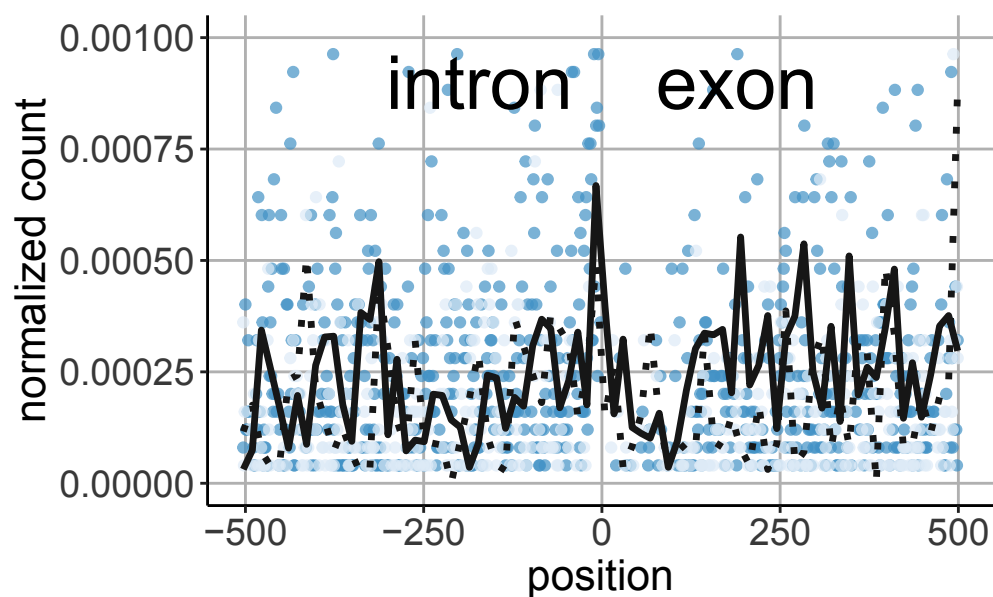

CSTF2-RRGGCGUAGCGUNN

• antisense — sense • antisense • sense

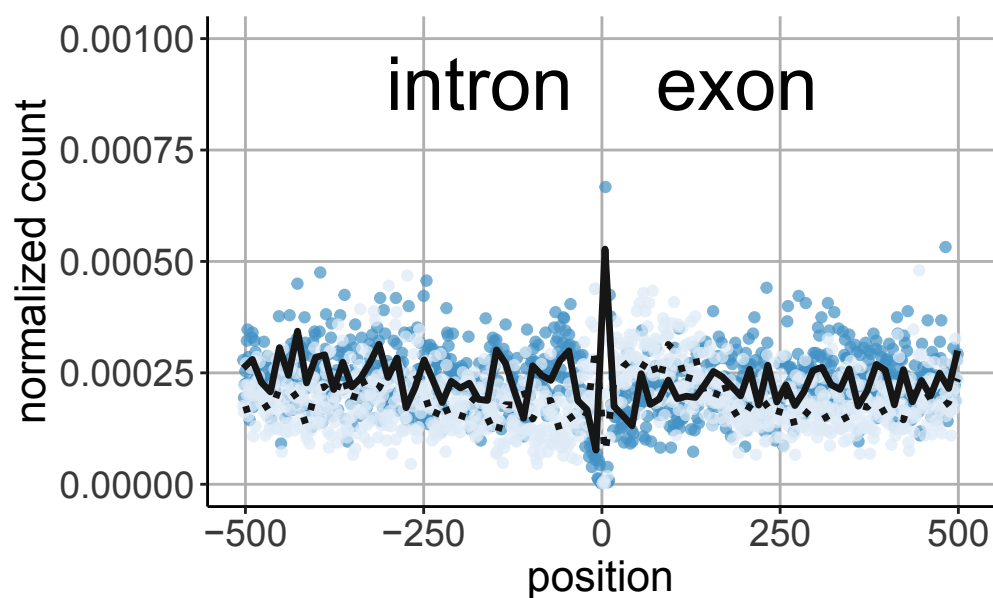

RBM28-GRGGCCGNGCGGUGG

• antisense — sense • antisense • sense

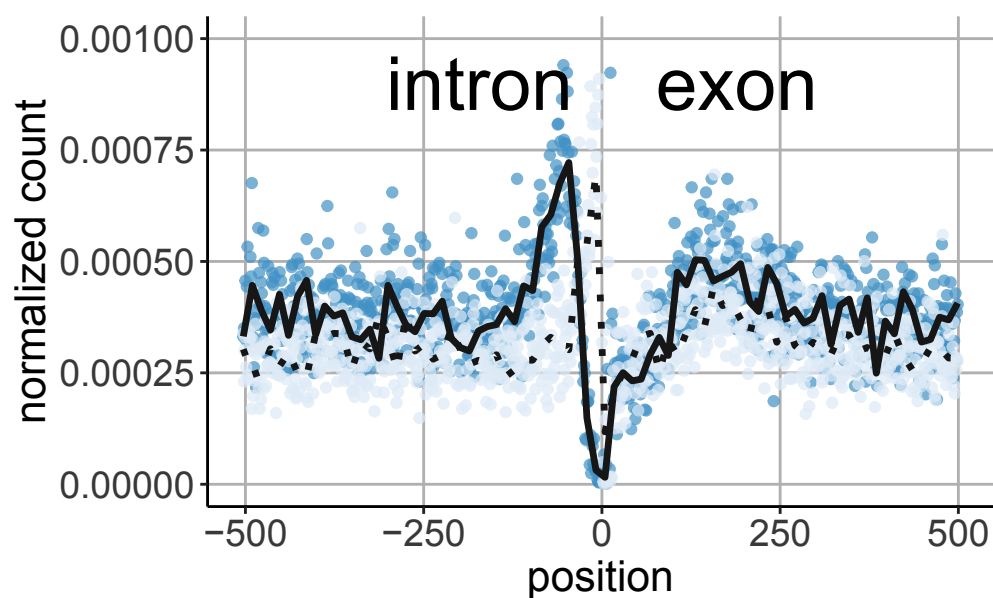

RBM28-GUGGGUCUCGG

• antisense — sense • antisense • sense

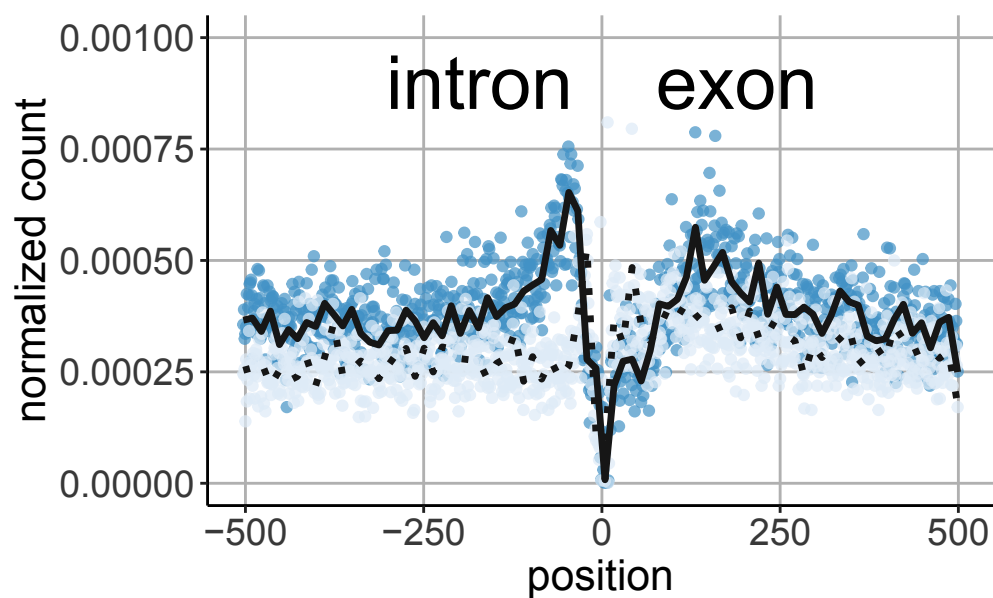

ZC3H10-GCGCAUGCGNN

• antisense — sense • antisense • sense

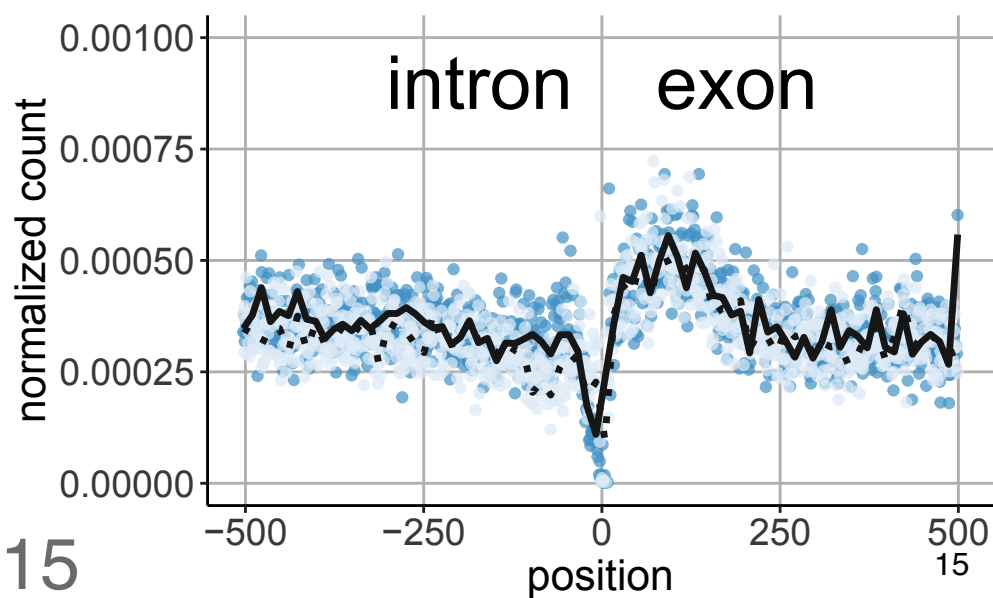



acceptor

ZC3H10-NGCGCAGCGUN

•• antisense — sense    • antisense • sense

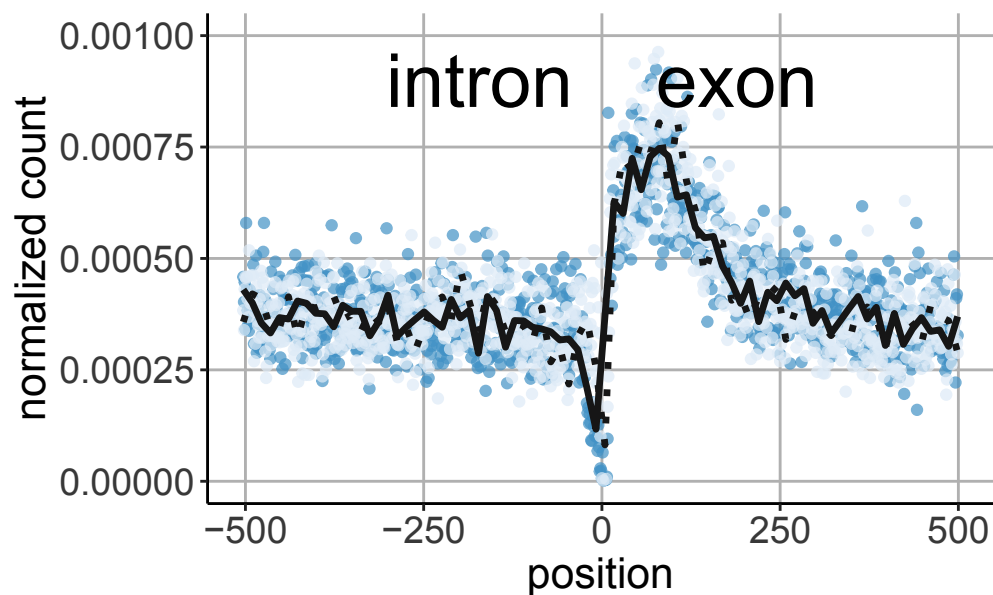

RBFOX1\_2-GCAUGNNGCAUG

•• antisense — sense    • antisense • sense

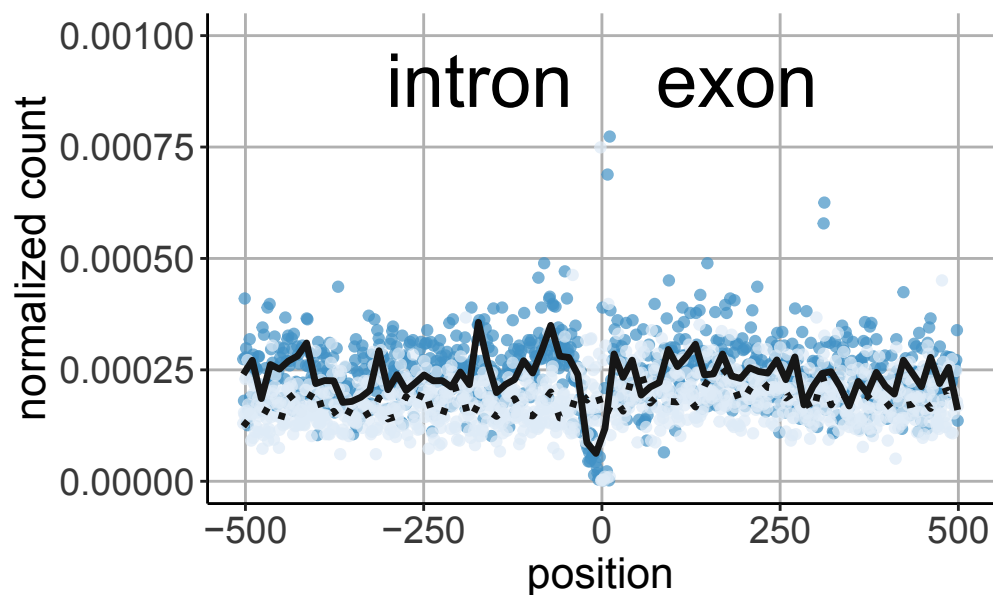

MSI1-KUAGUWKUAGK

•• antisense — sense    • antisense • sense

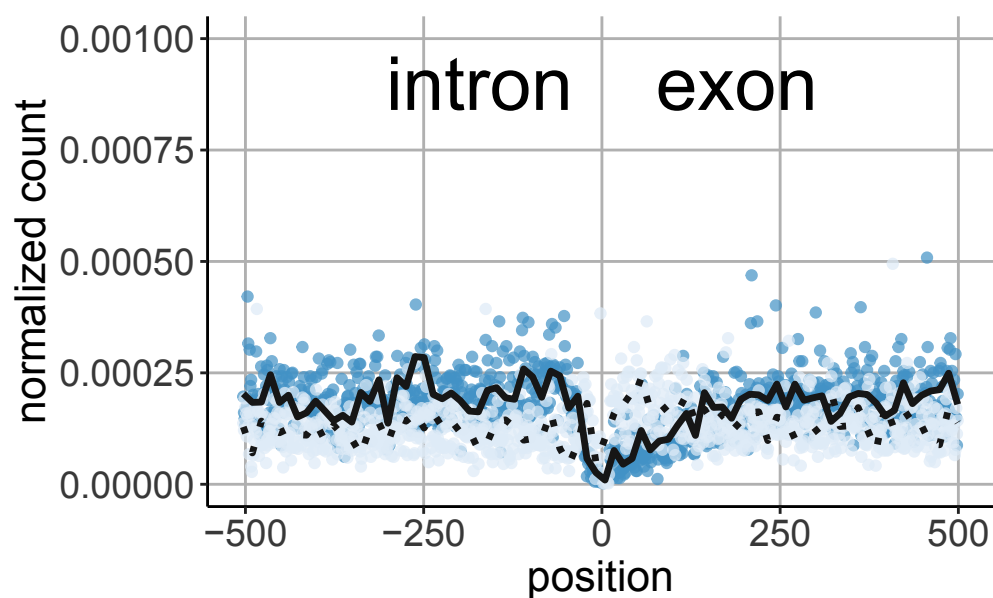

HEXIM1-GKDKCGACGGK

•• antisense — sense    • antisense • sense

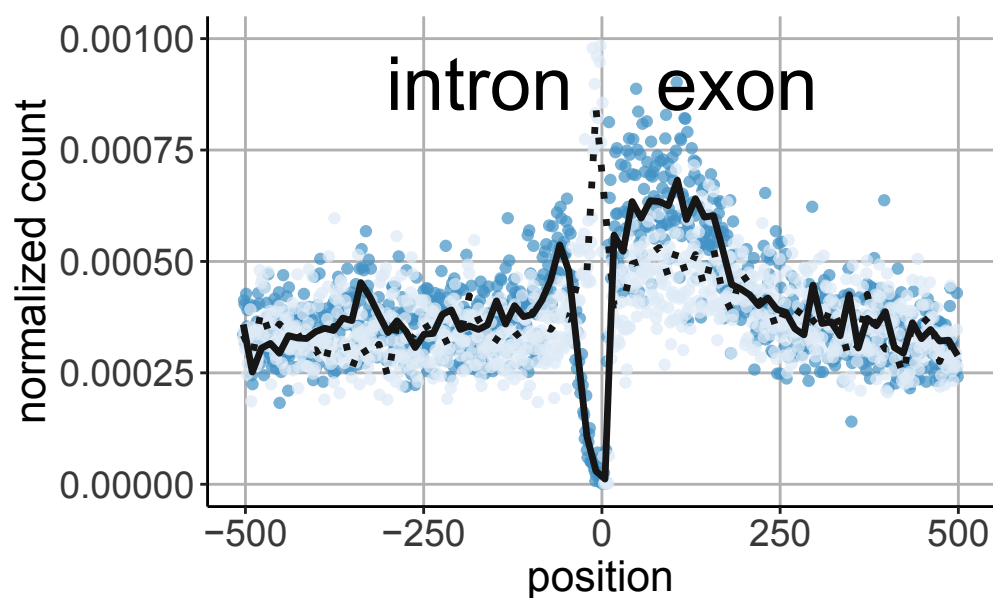

SART3-NGUUAGCRK

•• antisense — sense    • antisense • sense

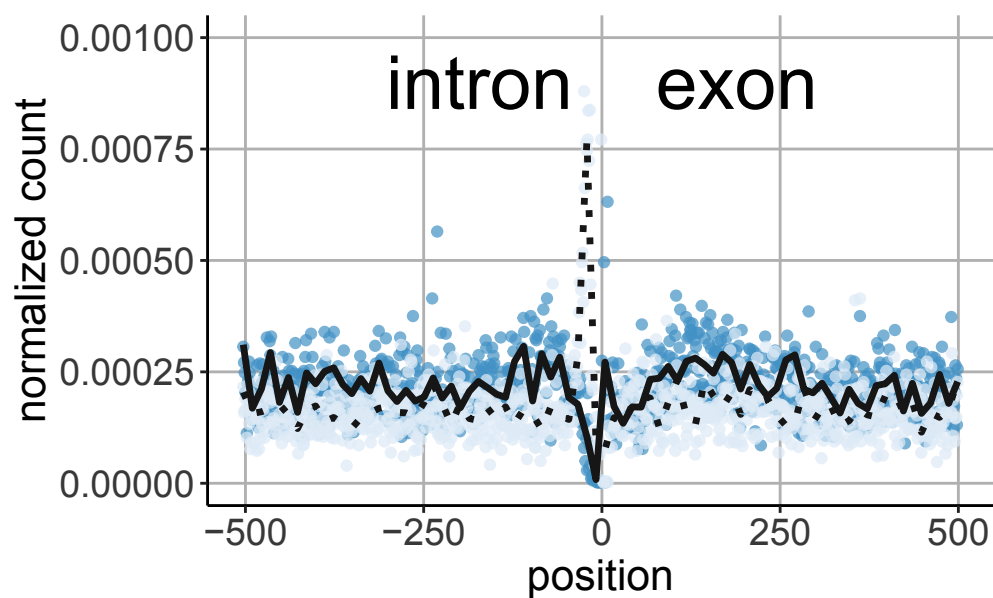

MSI2-GUAGUGDGUAGK

•• antisense — sense    • antisense • sense

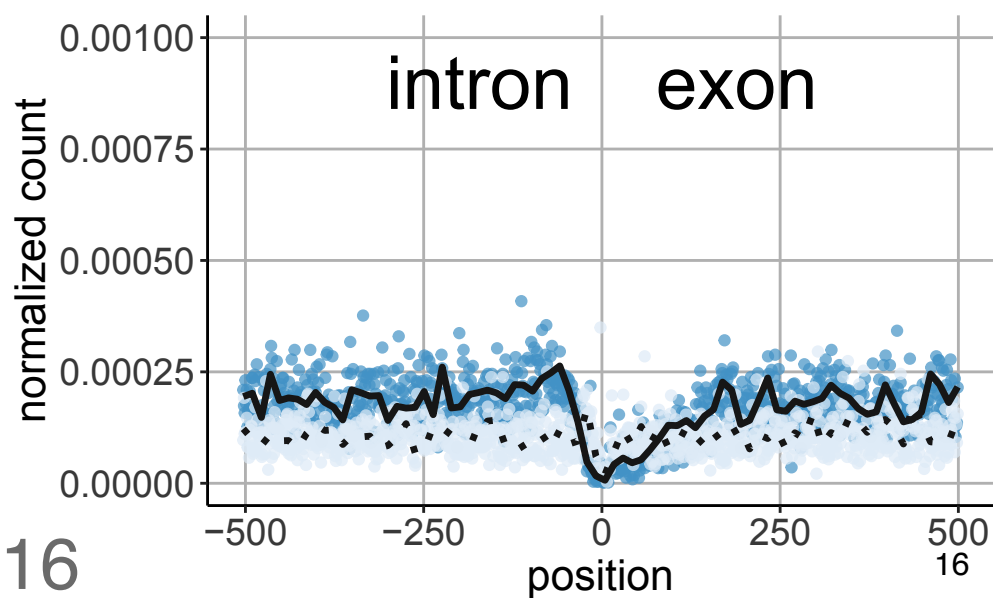

acceptor

MSI2-GUAGUNNNGUAGK

• antisense — sense    • antisense • sense

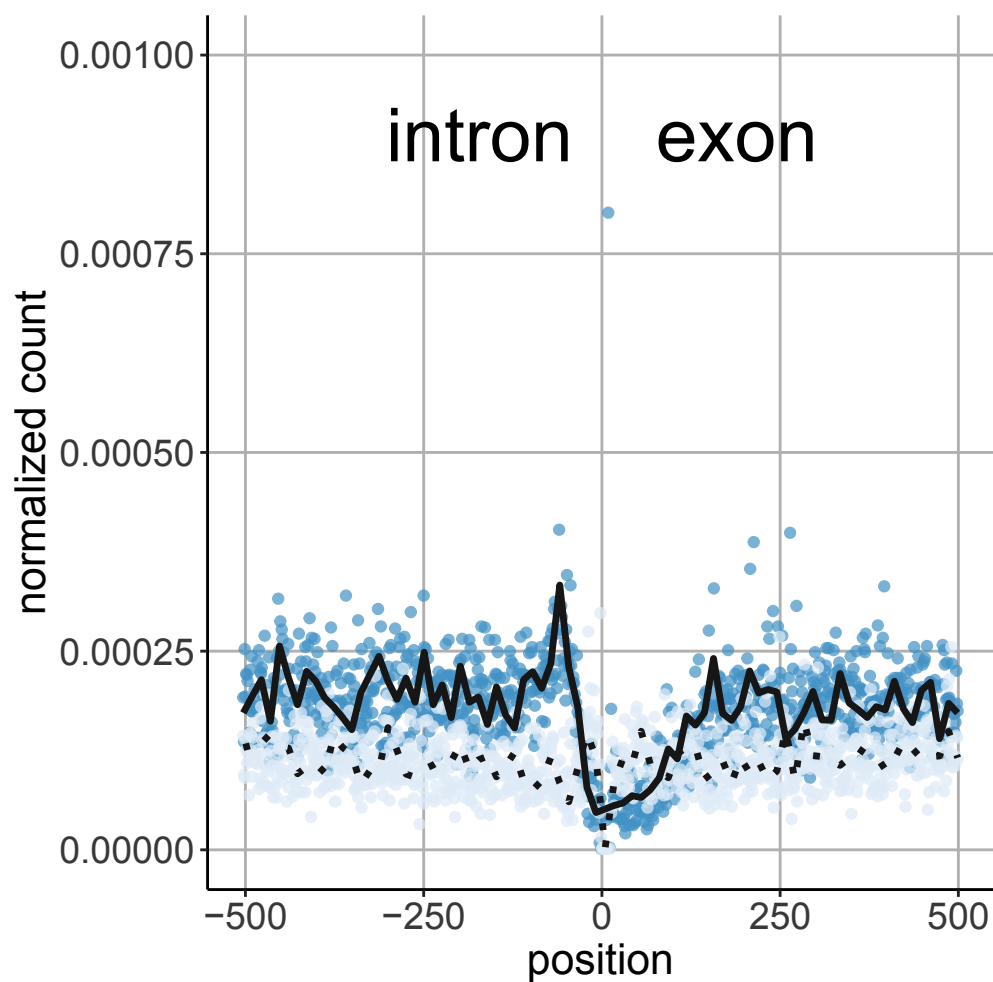

ZCRB1-GNNUUAAKK

• antisense — sense    • antisense • sense

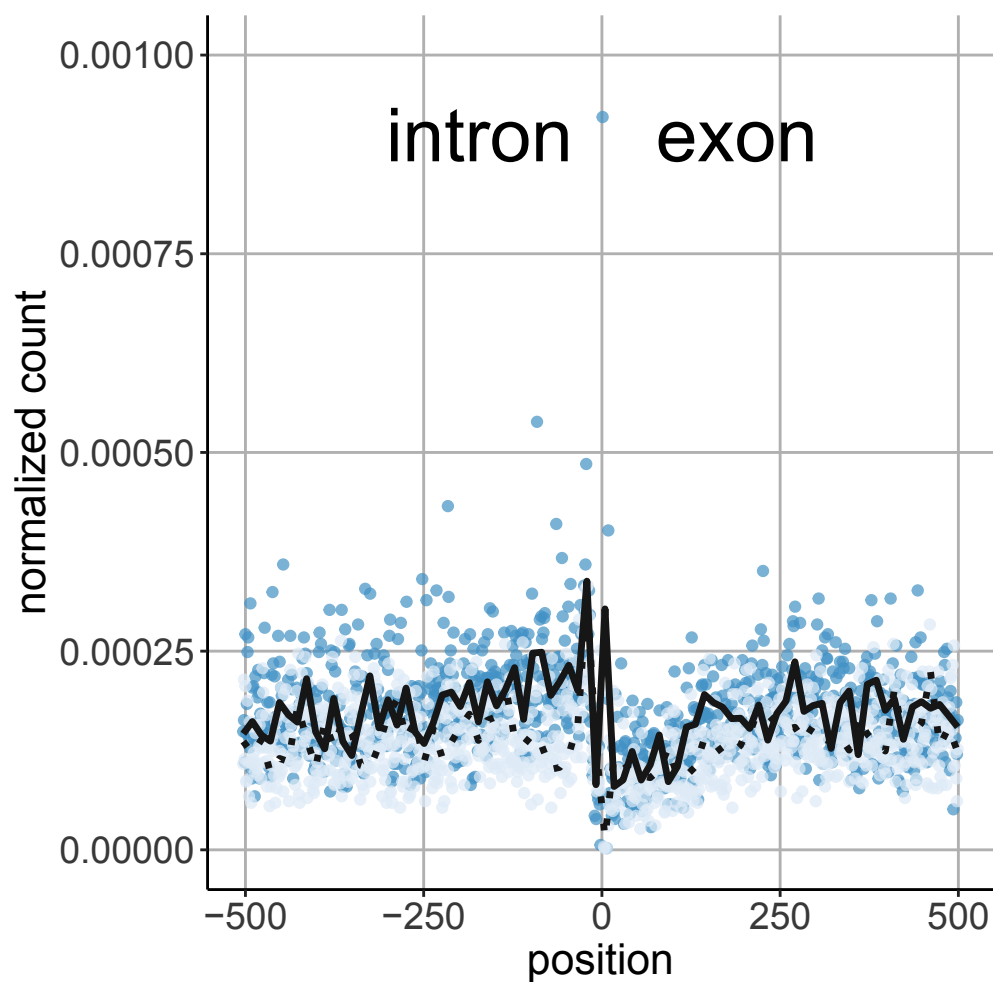

ZCRB1-GUGGACUUA

• antisense — sense    • antisense • sense

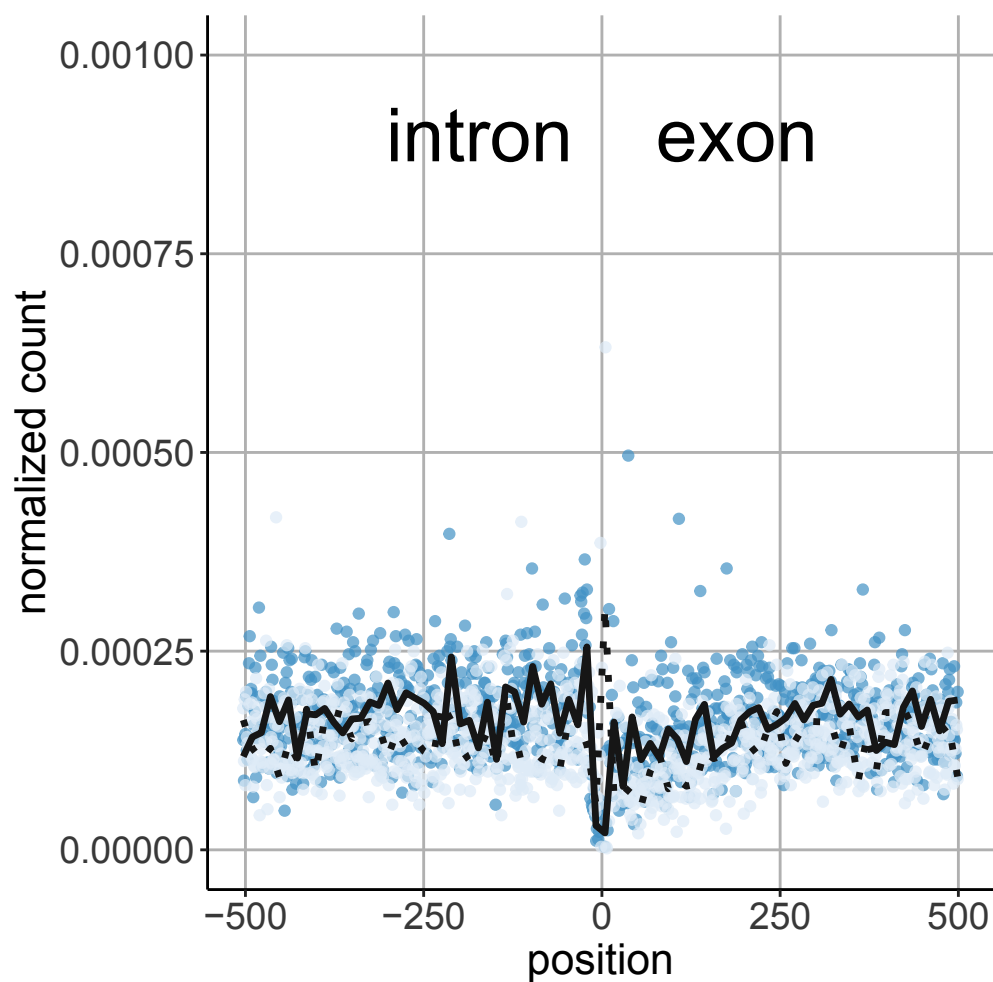

LARP6-GUGUCNNNNNNNNGAAGUCN

• antisense — sense    • antisense • sense

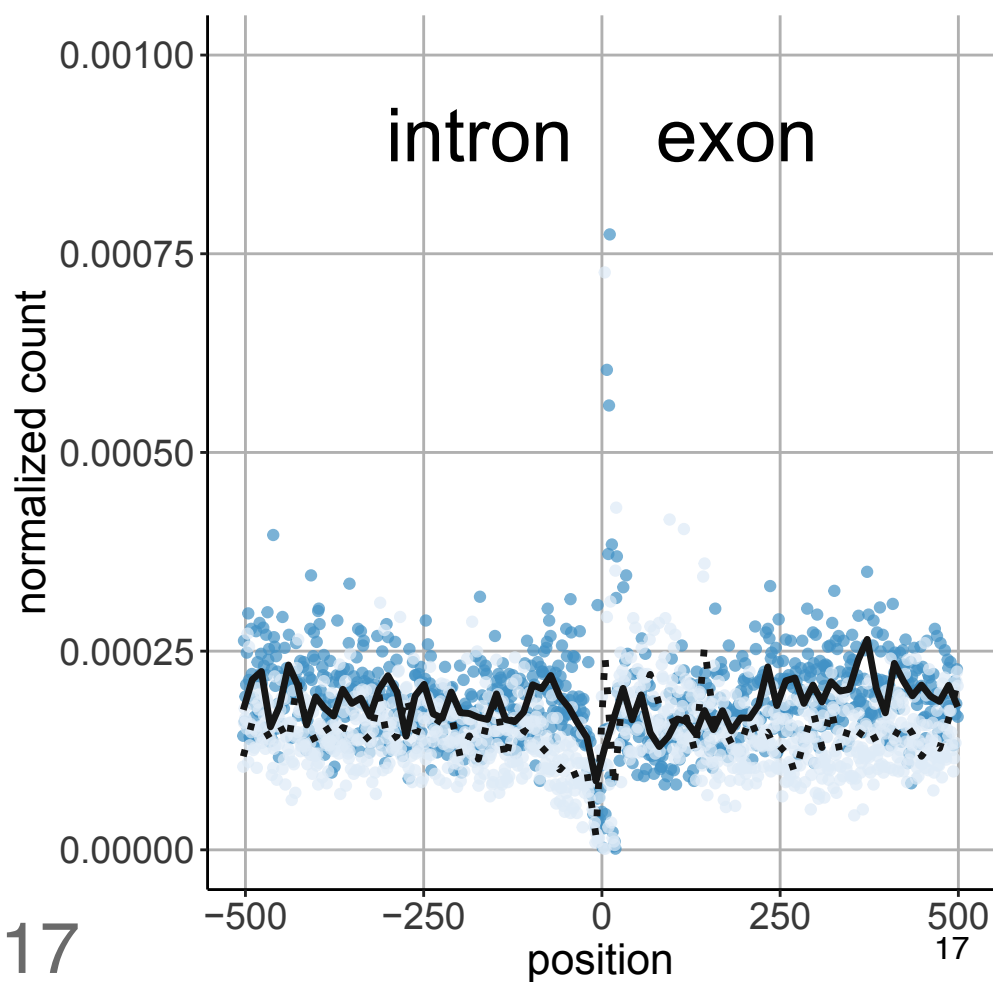

acceptor

DAZ1\_2-NNUGUGUGSGUUUCCGSN

• antisense — sense • antisense • sense

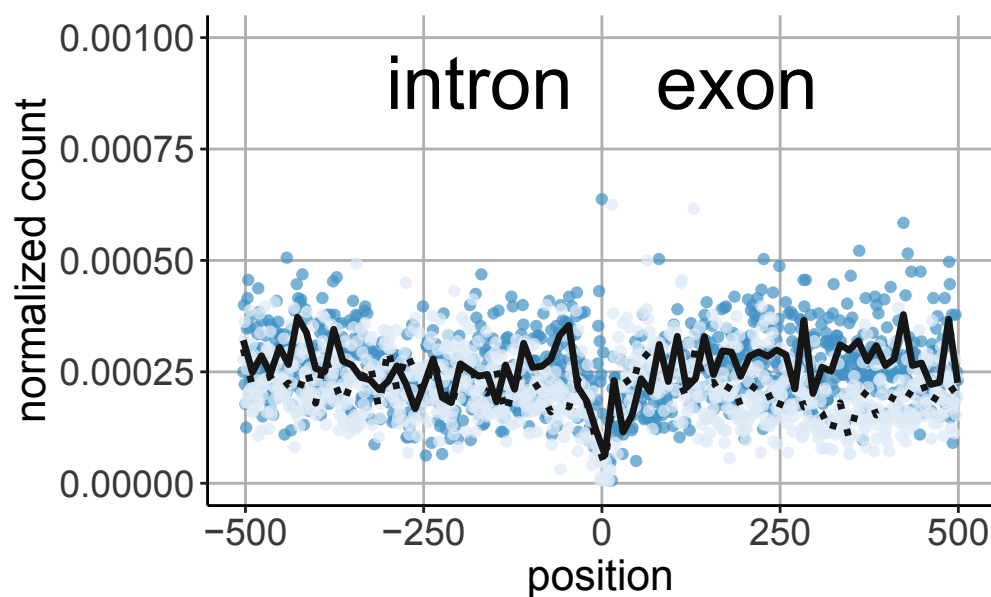

DAZ1\_2-NUGKUGUUGUAGN

• antisense — sense • antisense • sense

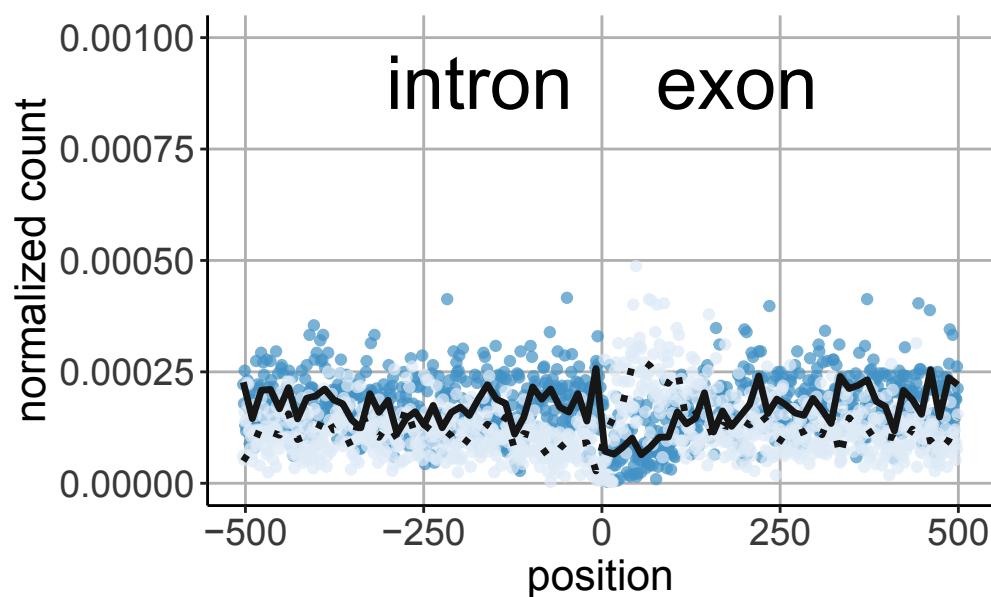

DAZ1\_2-CRNAUGUUAGUAGN

• antisense — sense • antisense • sense

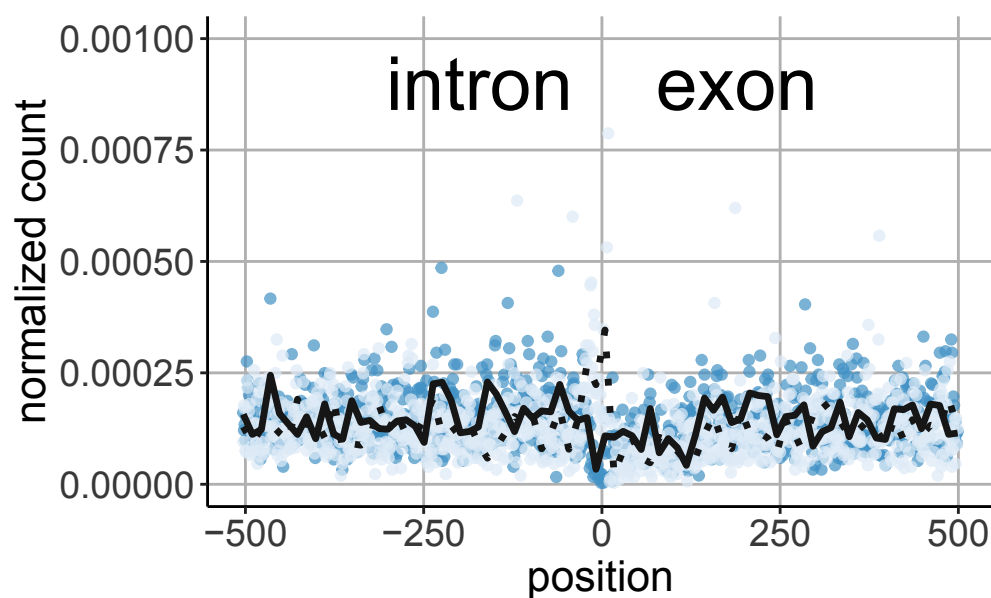

DAZ3-NNUGUGUGSGUUUCCGSN

• antisense — sense • antisense • sense

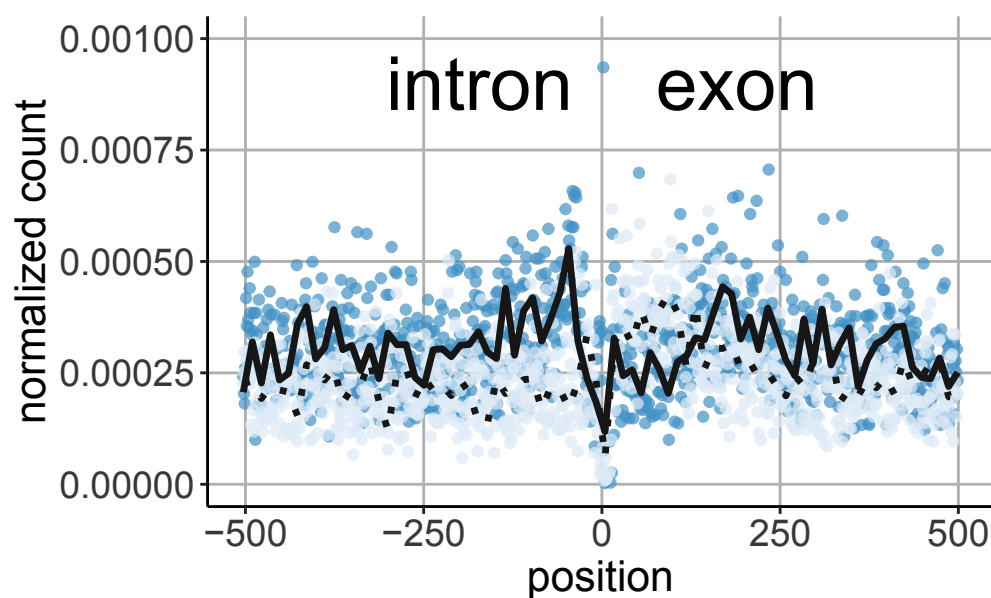

DAZ4-NNUGUGUGSGUUUCCGSN

• antisense — sense • antisense • sense

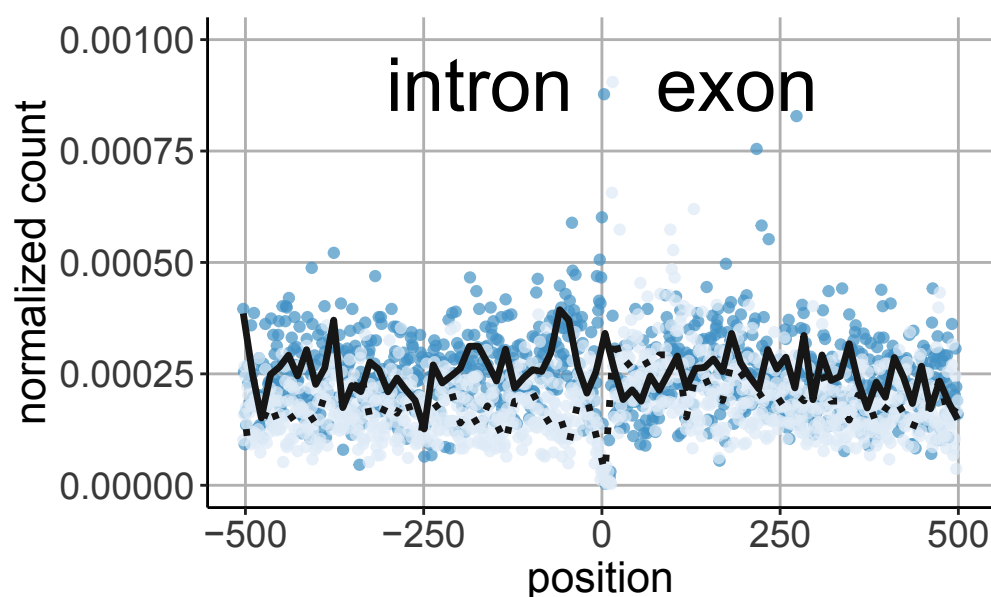

DAZ4-CUGKUGUUGUAGG

• antisense — sense • antisense • sense

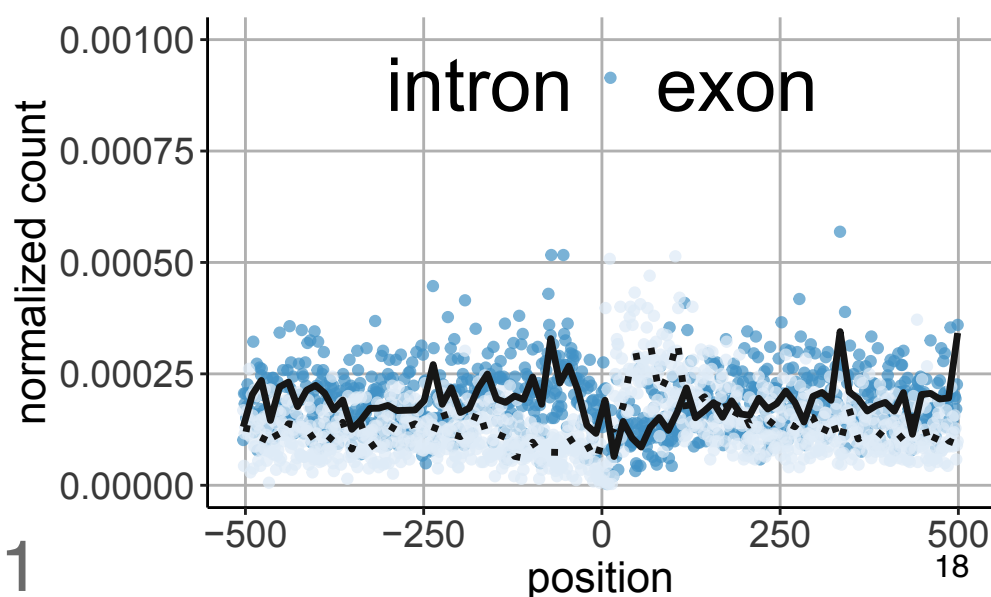

1

18

acceptor

DAZL-NNUGYGUGCGUUUCCGSN

• antisense — sense • antisense • sense

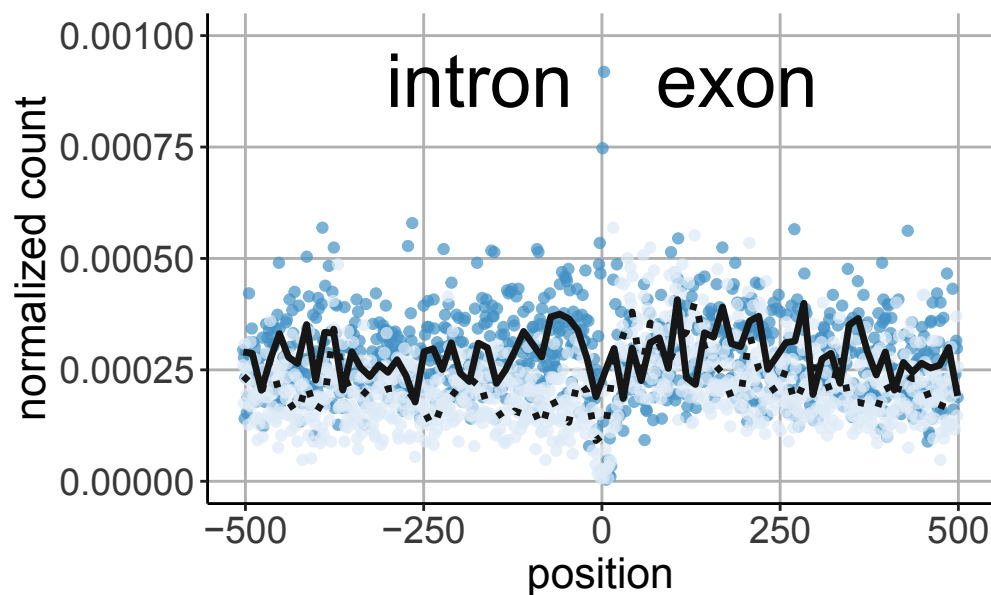

HNRNPA1-NGCAGUUUUAGGGCN

• antisense — sense • antisense • sense

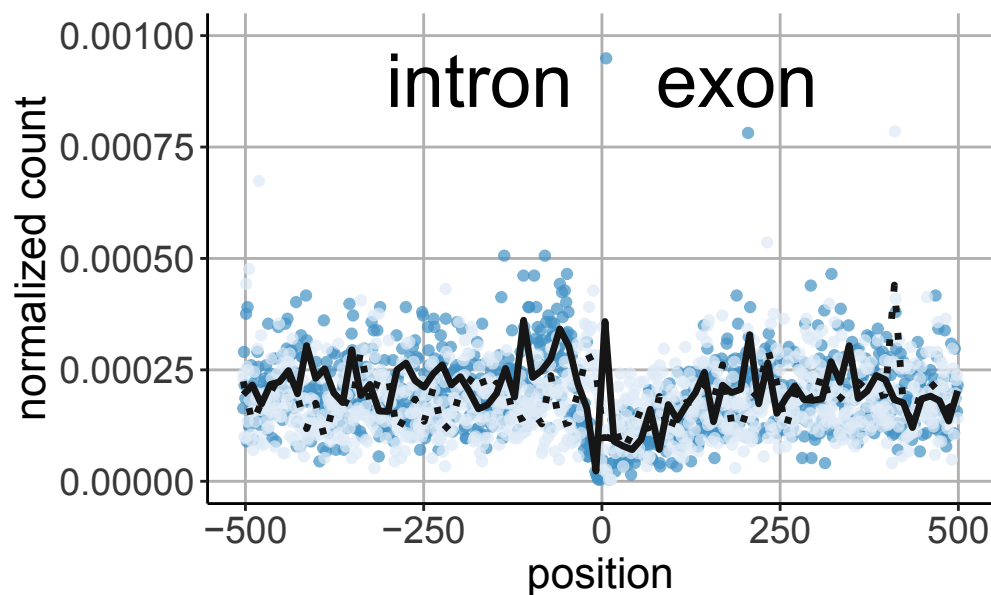

HNRNPC-NGGGUCUNAUUUUUUAAN

• antisense — sense • antisense • sense

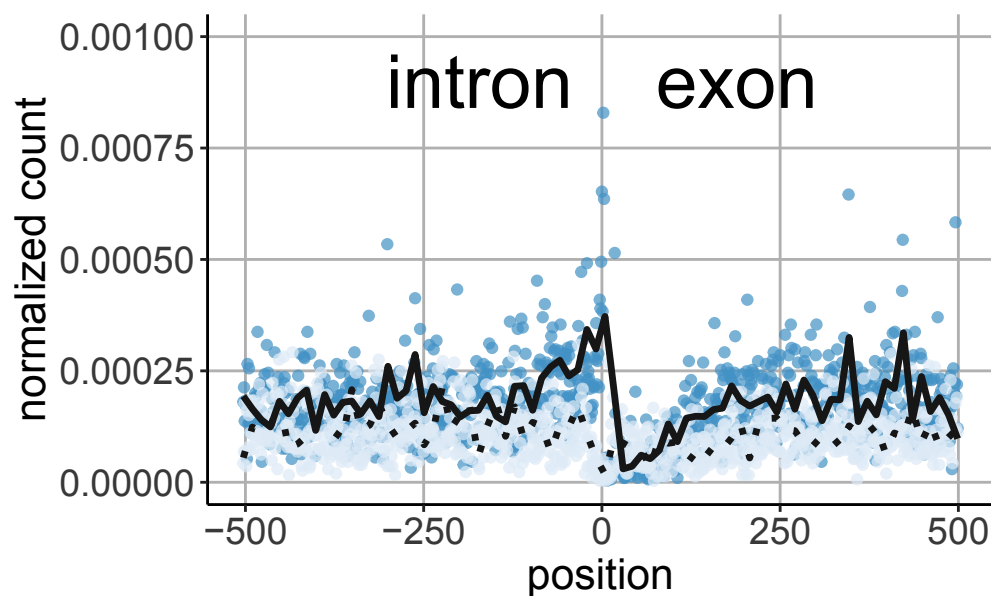

HNRNPCL1-NGGGUCUNAUUUUUUAAN

• antisense — sense • antisense • sense

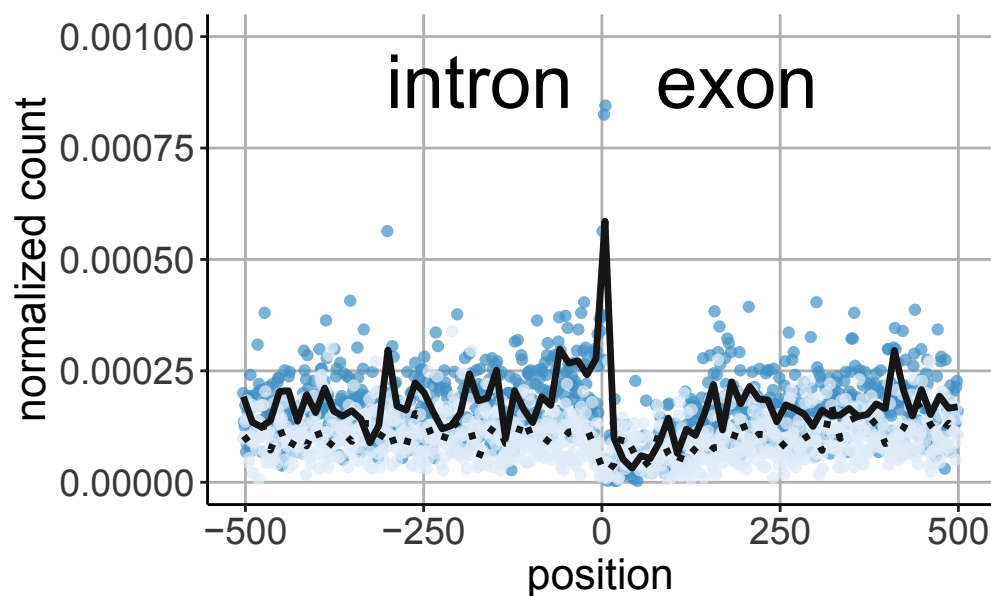

MKRN1-NYGUAAAKUGUAGN

• antisense — sense • antisense • sense

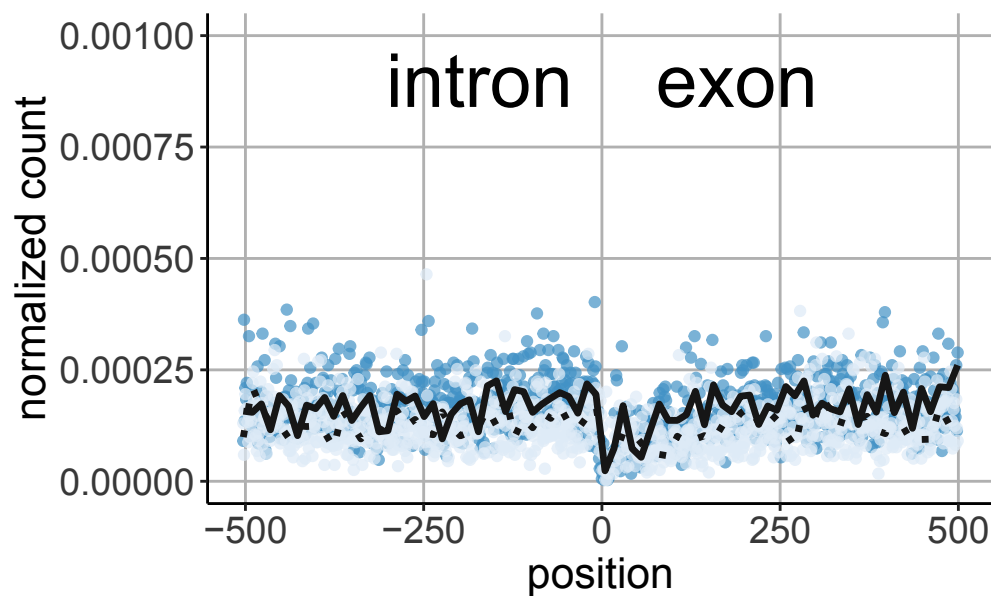

RALY-GGGUCUWUUUUUUA

• antisense — sense • antisense • sense

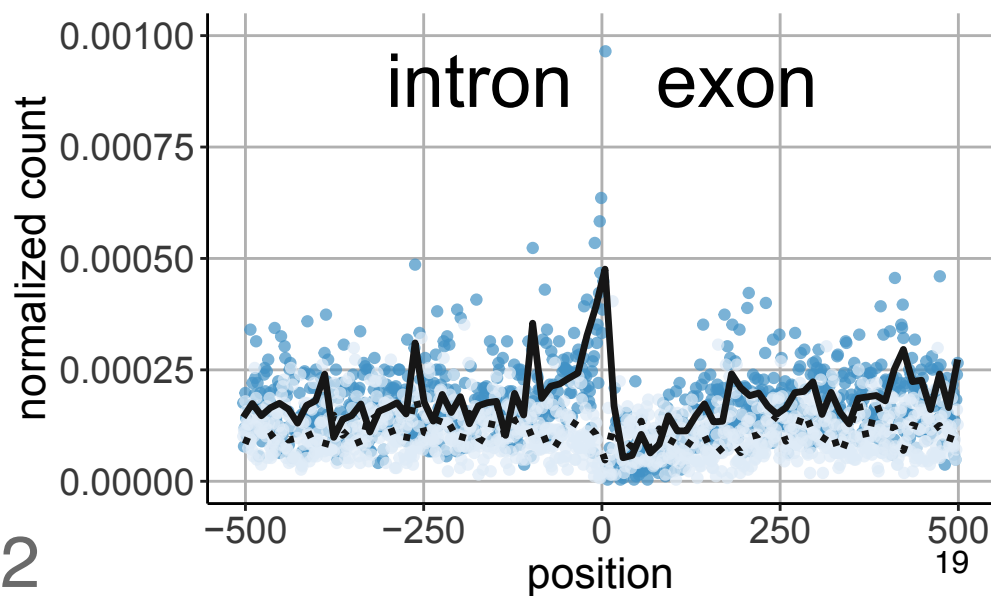

acceptor

RBFOX1\_4-GKUGCAUGUG

• antisense — sense • antisense • sense

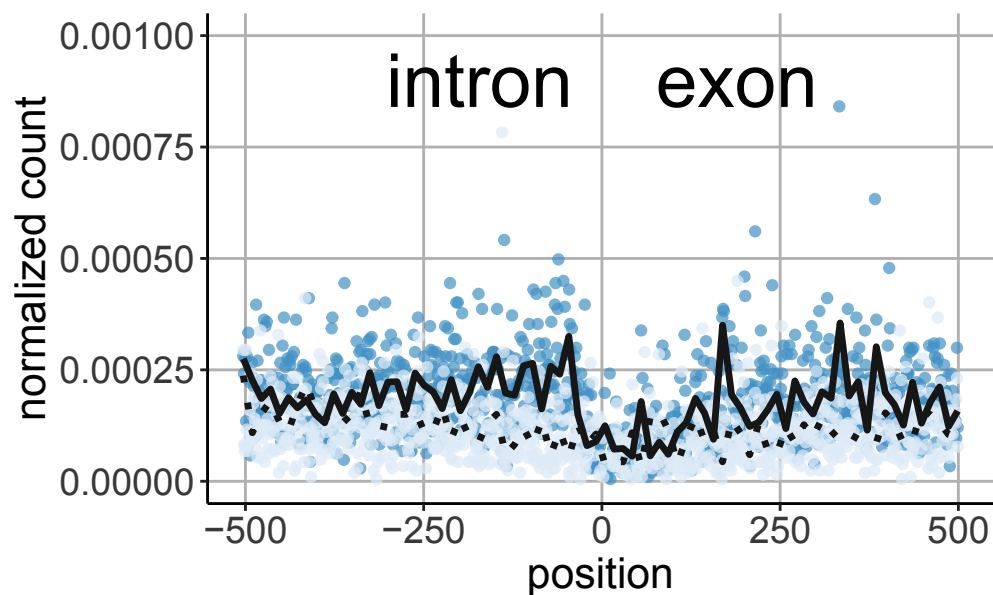

RBFOX3-GUWGCAUGUG

• antisense — sense • antisense • sense

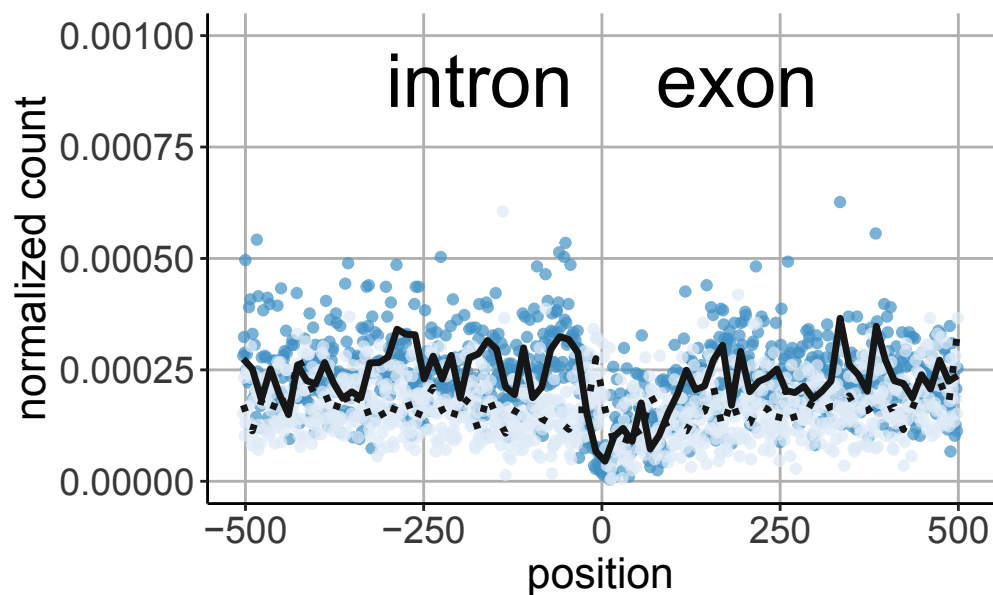

RBM4-KGUUGCGCGGG

• antisense — sense • antisense • sense

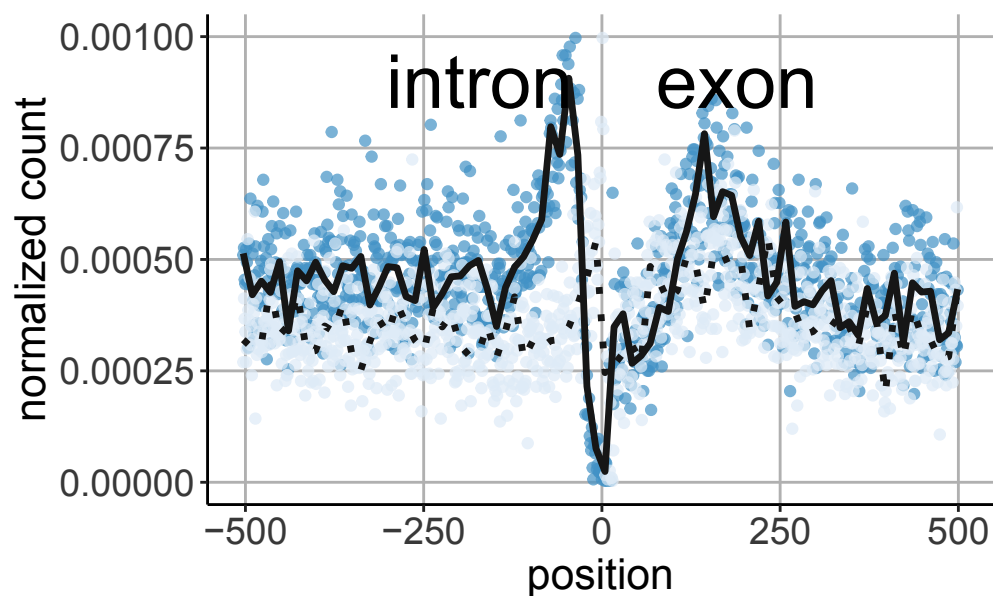

RBM4-UGAGUGCGGUAG

• antisense — sense • antisense • sense

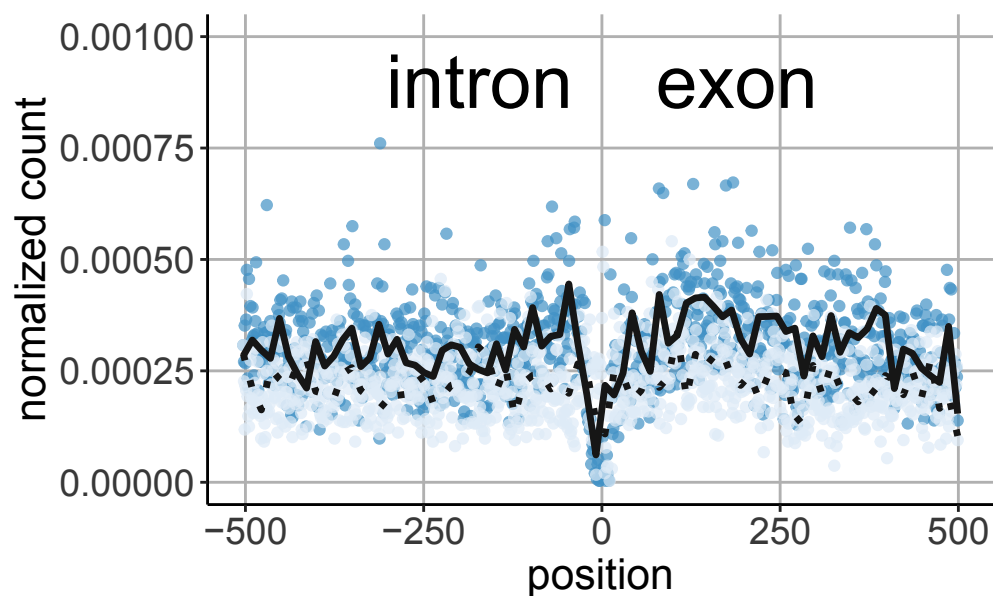

RBM4B-KGUUGCGCGGG

• antisense — sense • antisense • sense

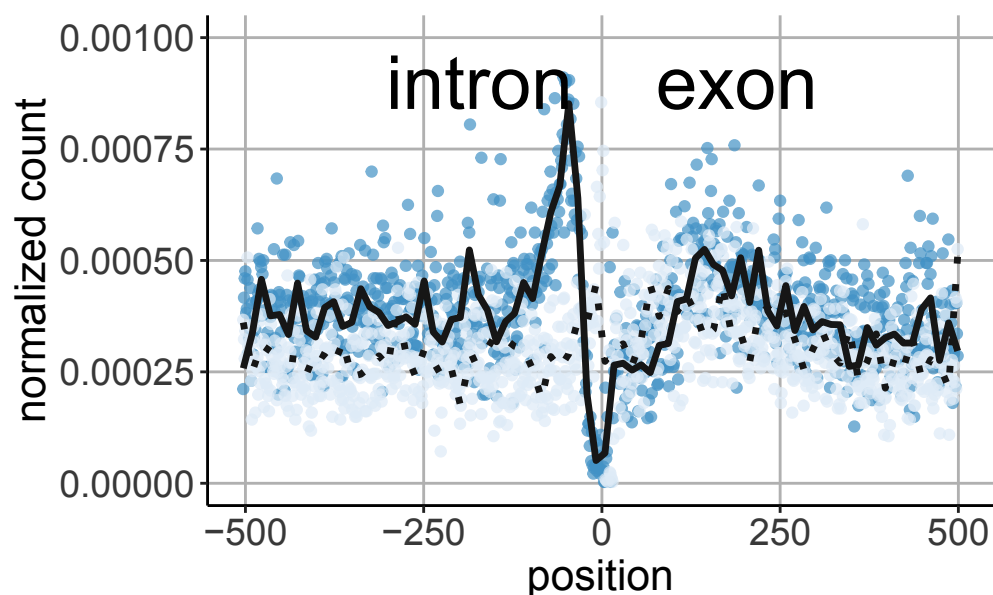

RBM4B-UGAGUGCGGUAG

• antisense — sense • antisense • sense

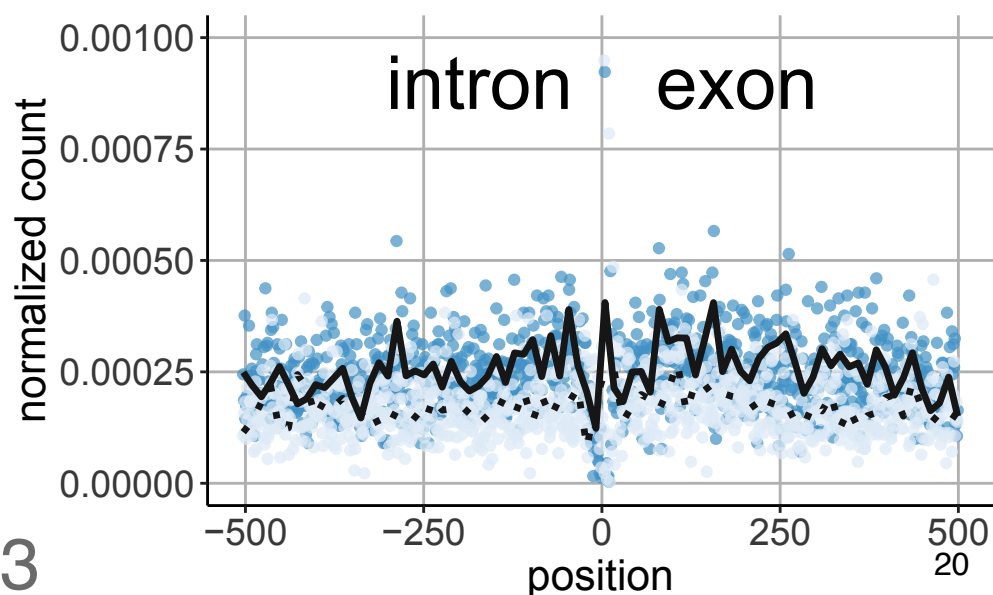

acceptor

RBM6-YRCGCUCCUNGCY

• antisense — sense    • antisense • sense

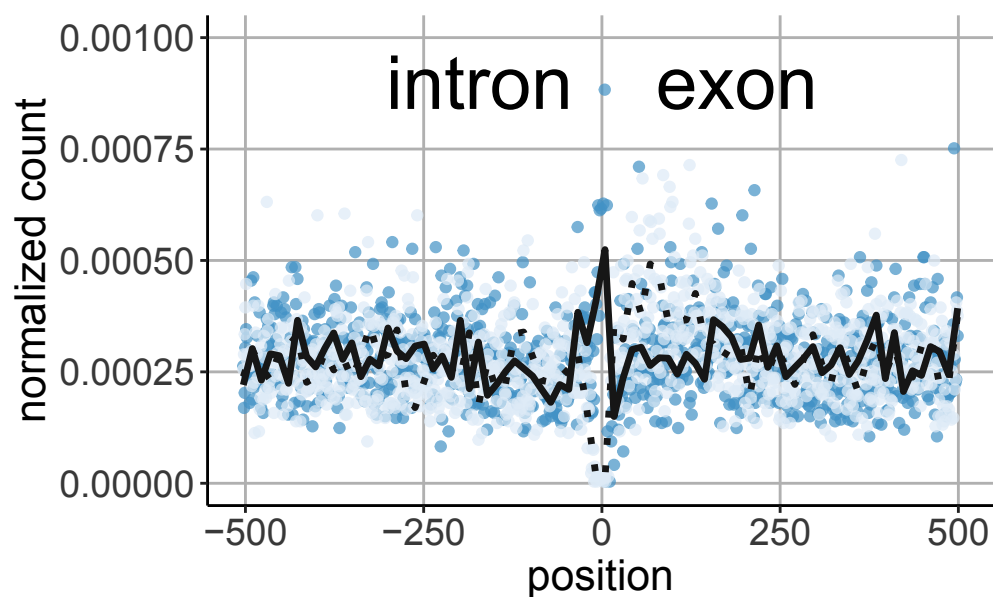

RBM6-YRYGCUCGUGGCYN

• antisense — sense    • antisense • sense

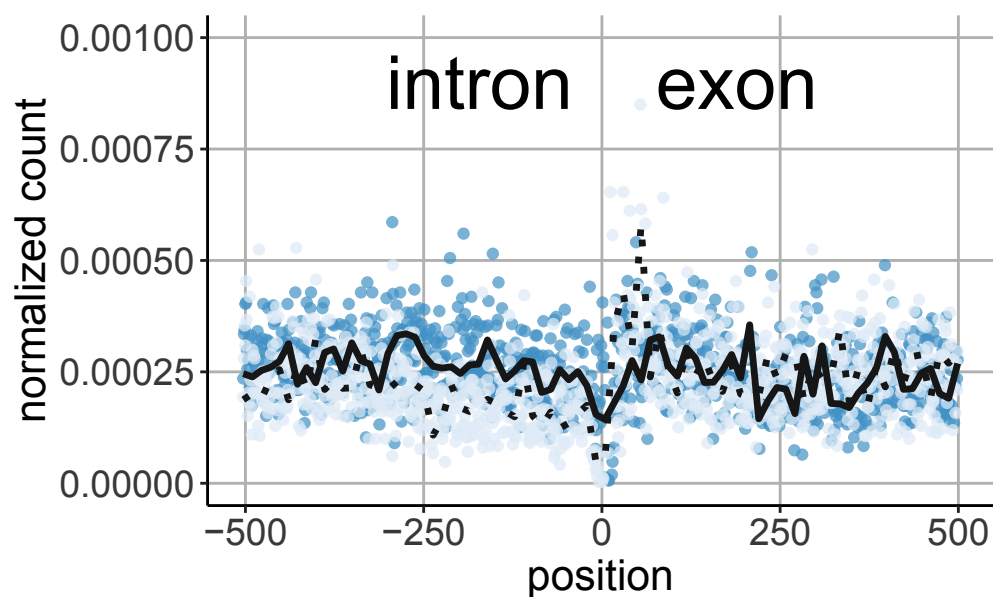

RBMS1-SGUGCAUAAKGCN

• antisense — sense    • antisense • sense

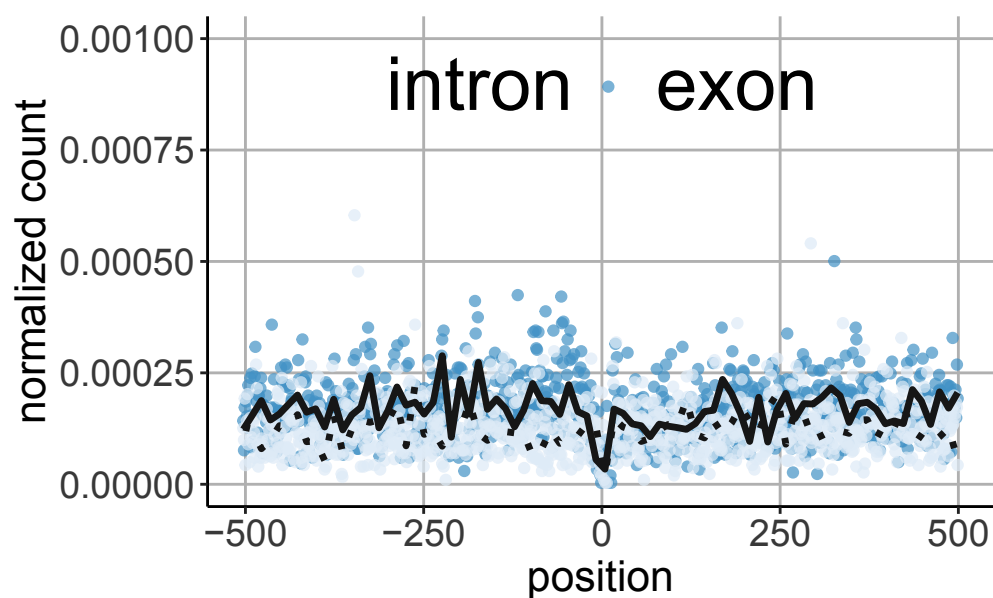

RBMS2-NUGCAUAAUGN

• antisense — sense    • antisense • sense

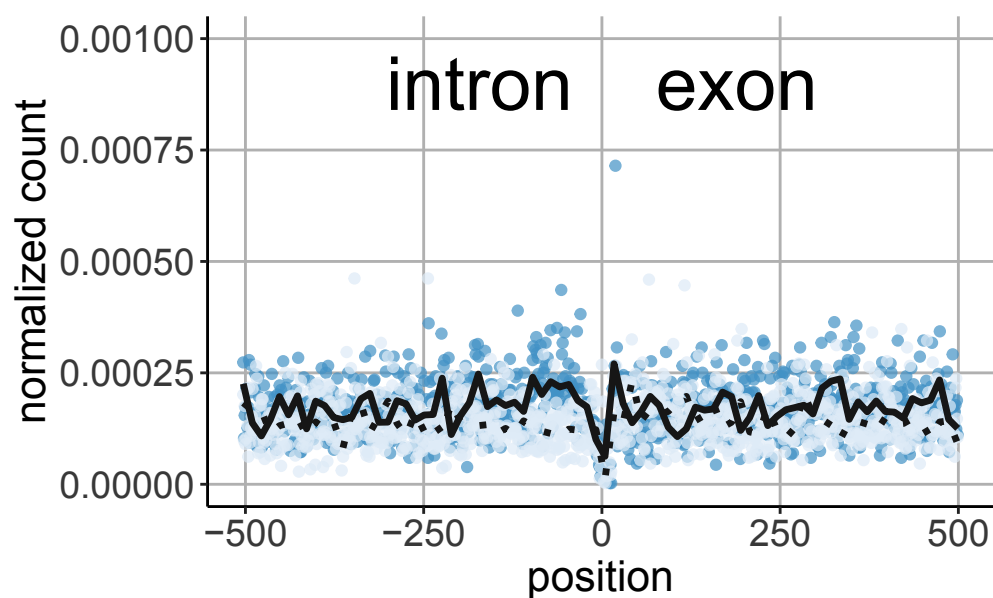

RBMS3-NUGCAUAAUGN

• antisense — sense    • antisense • sense

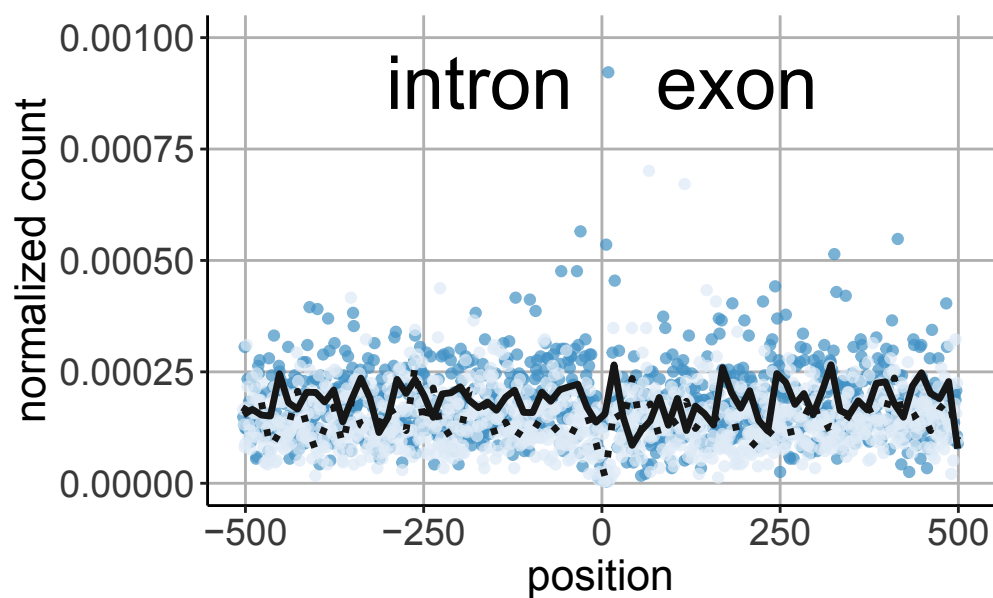

RBMS3-SAUGYAUAAKUG

• antisense — sense    • antisense • sense

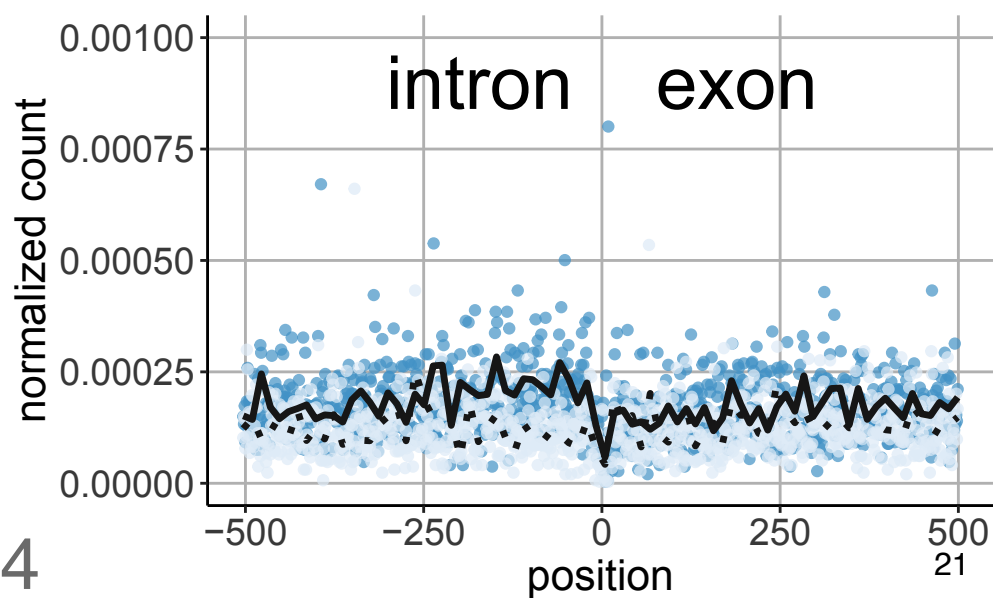

acceptor

RBMY1E-NGCUUCGNGCN

RBMY1E-NAGCUUNGUGCUN

•• antisense — sense • antisense • sense

•• antisense — sense • antisense • sense

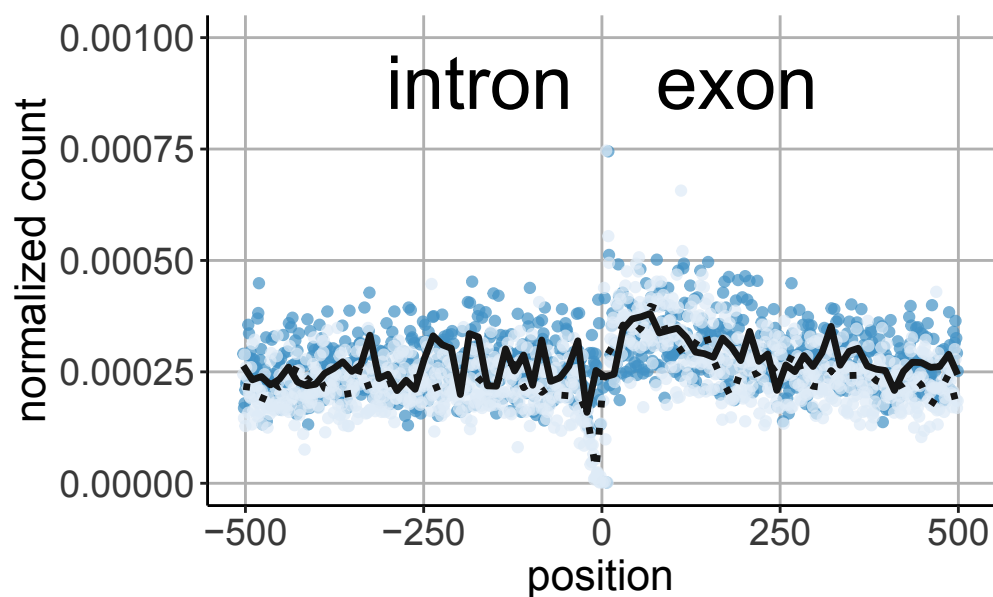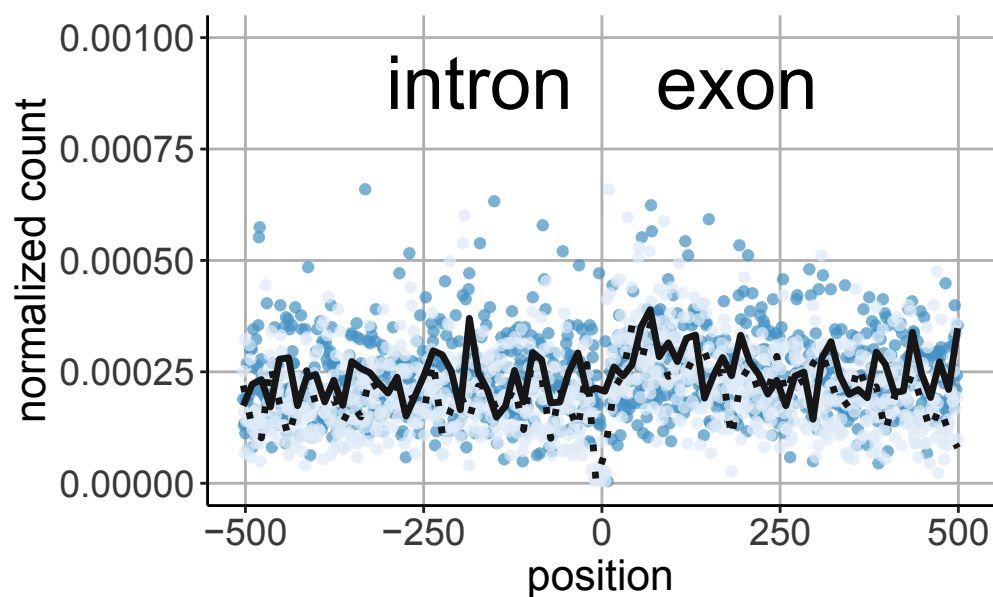

RBMY1F-NGCCCUCAAGGYN

RBMY1F-GCGCAAGAGC

•• antisense — sense • antisense • sense

•• antisense — sense • antisense • sense

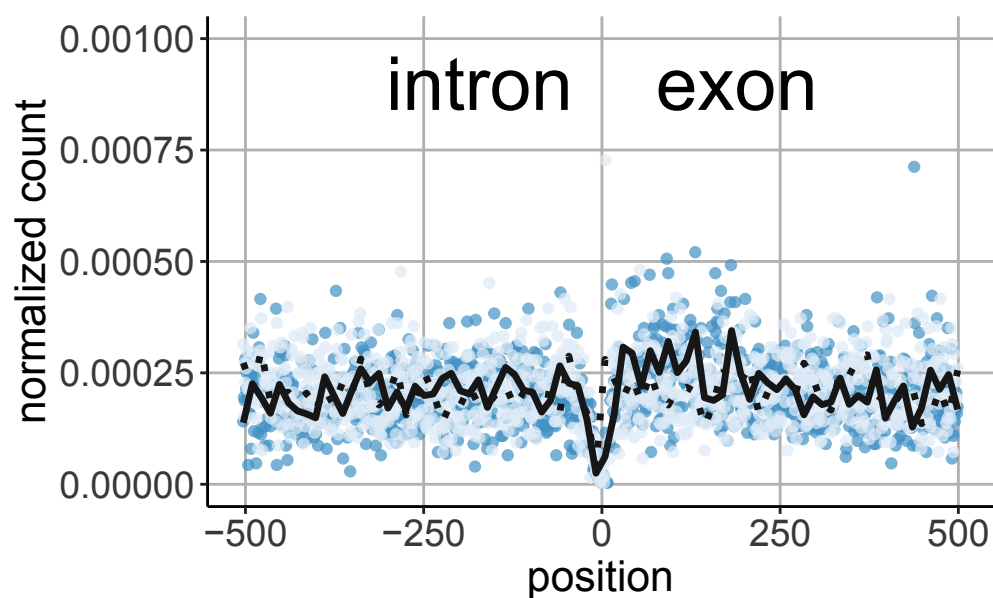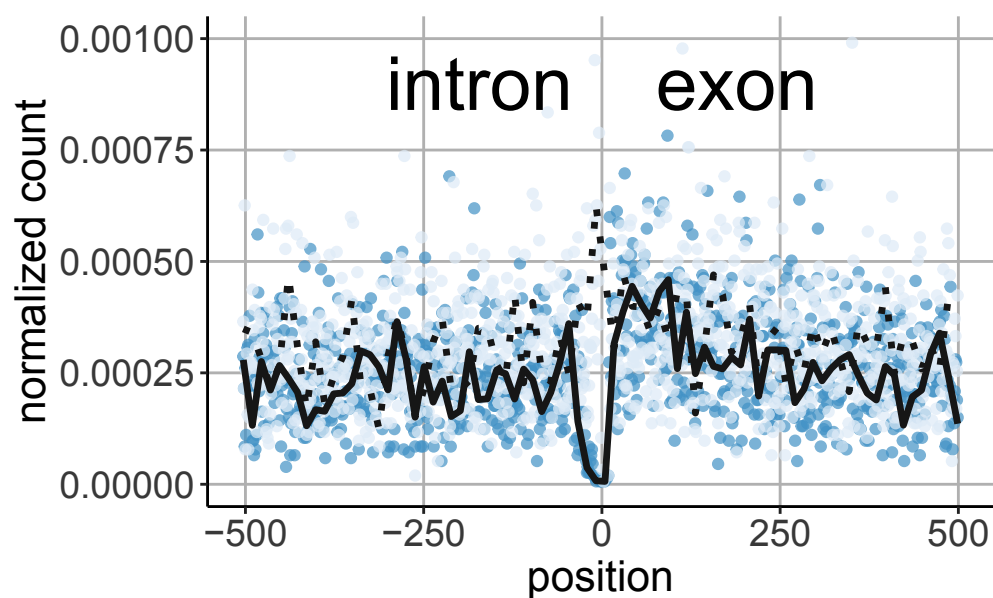

RBMY1J-NGCCCUCAAGGYN

RBMY1J-GCGCAAGAGC

•• antisense — sense • antisense • sense

•• antisense — sense • antisense • sense

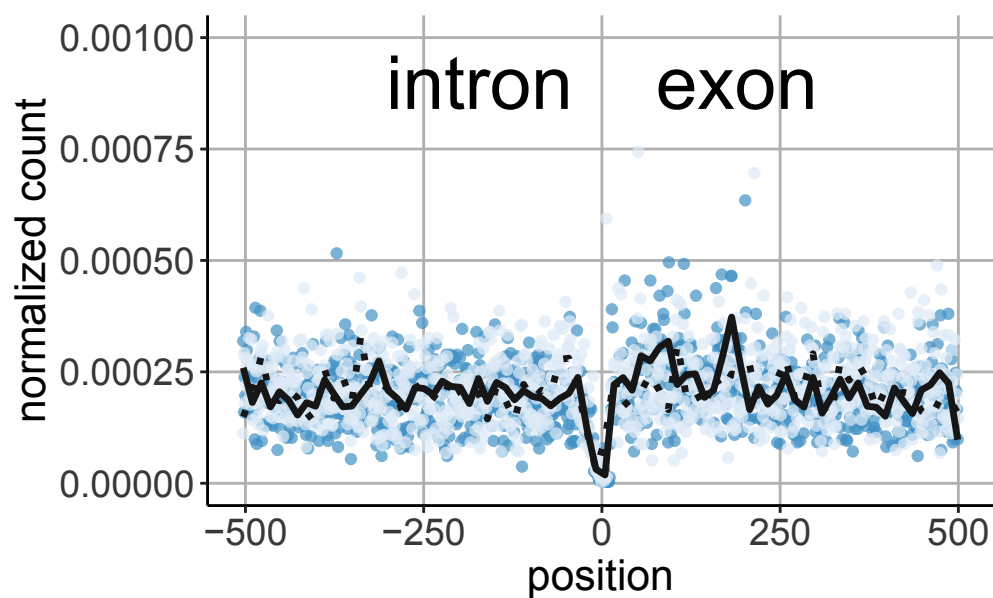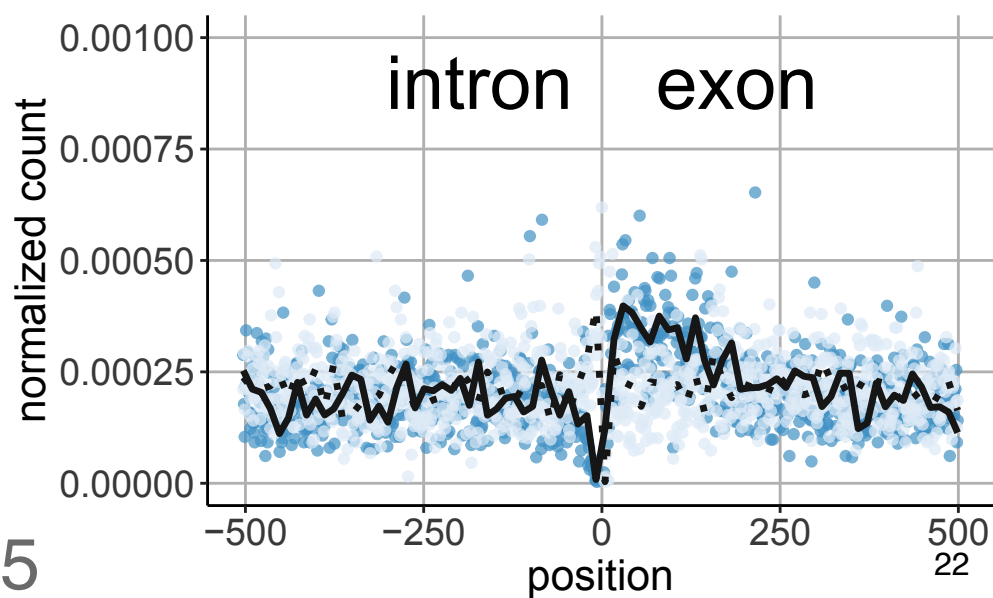

acceptor

RBM1J-NGCGUCGUGGCN

•• antisense — sense    • antisense • sense

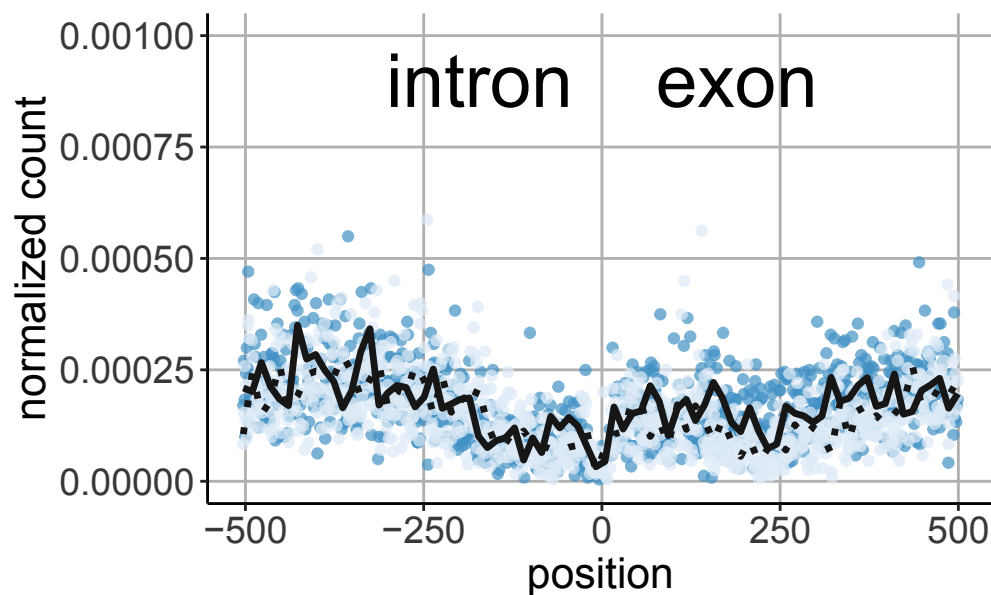

RBM1J-UGAAUUCGUCN

•• antisense — sense    • antisense • sense

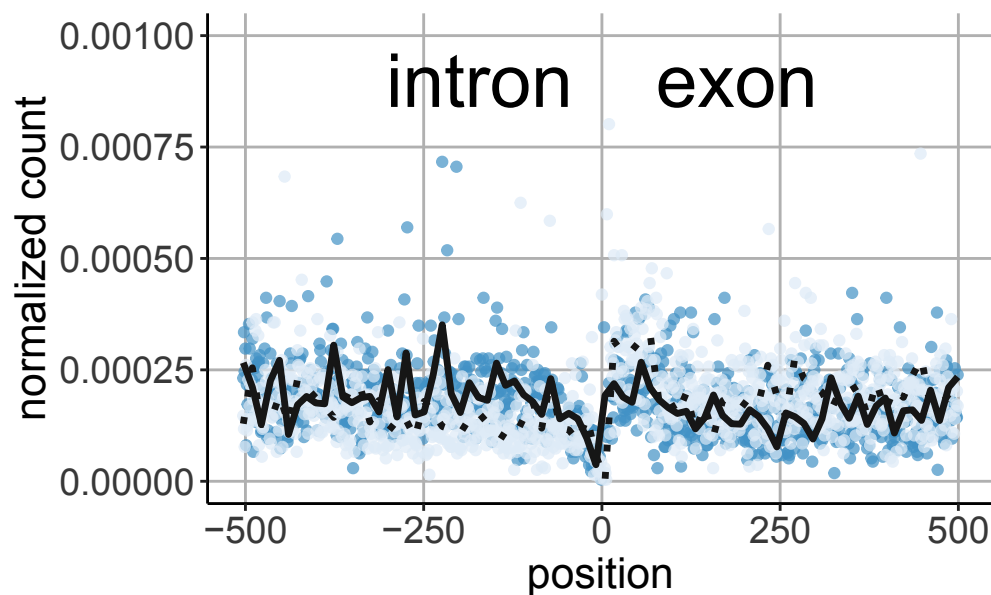

RC3H1\_2-YRCGUUUUAGKR

•• antisense — sense    • antisense • sense

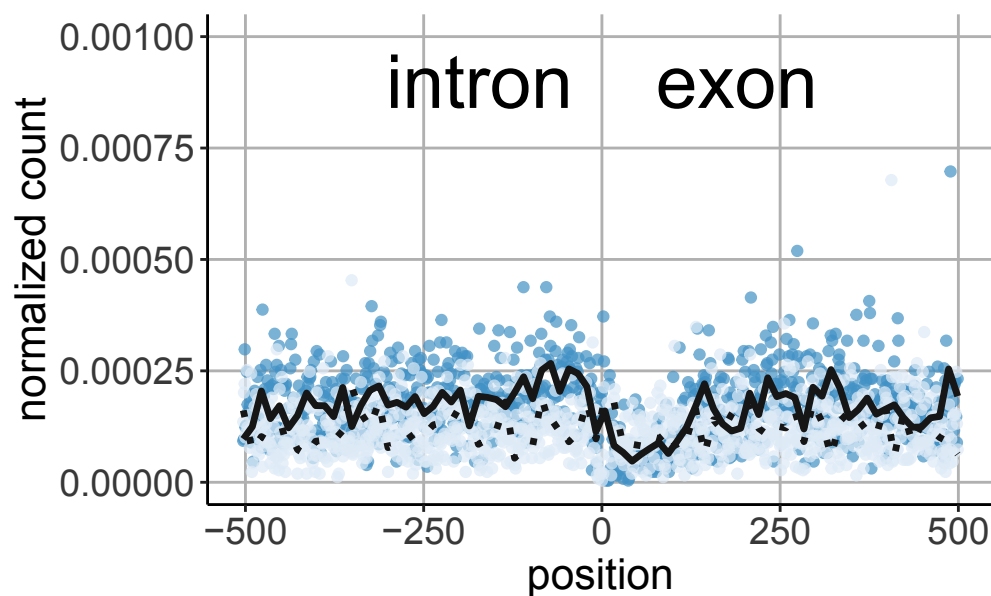

RC3H2-CURCGUUUUAGKAG

•• antisense — sense    • antisense • sense

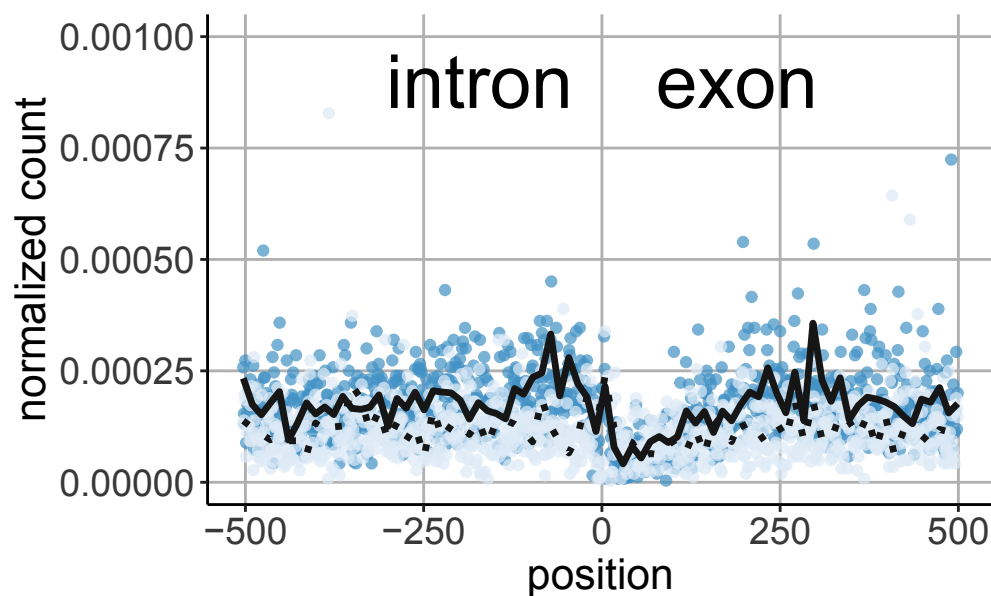

RC3H2-CUCGUAUCGAG

•• antisense — sense    • antisense • sense

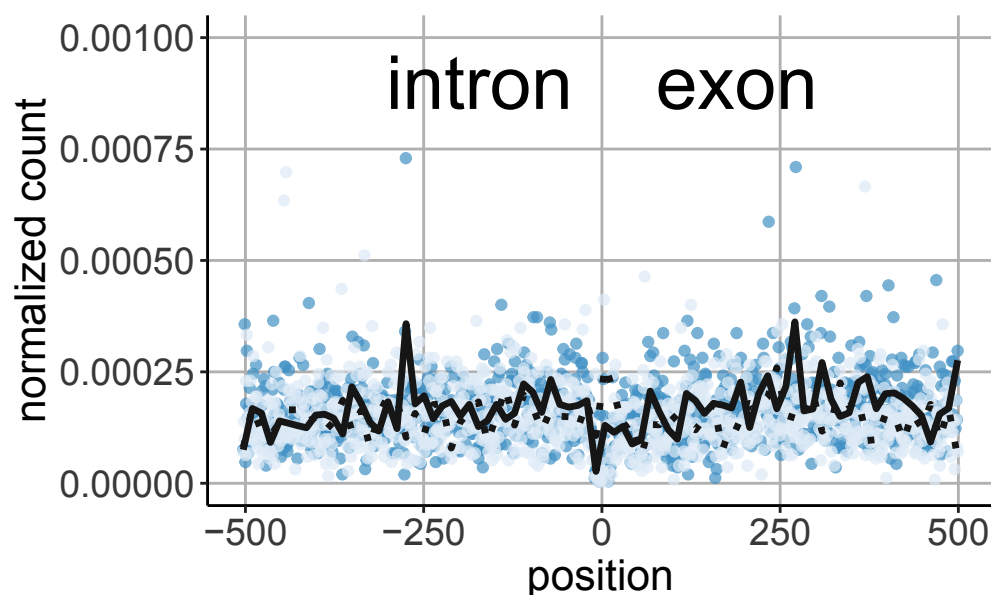

RC3H2-CCUCUNUGAGG

•• antisense — sense    • antisense • sense

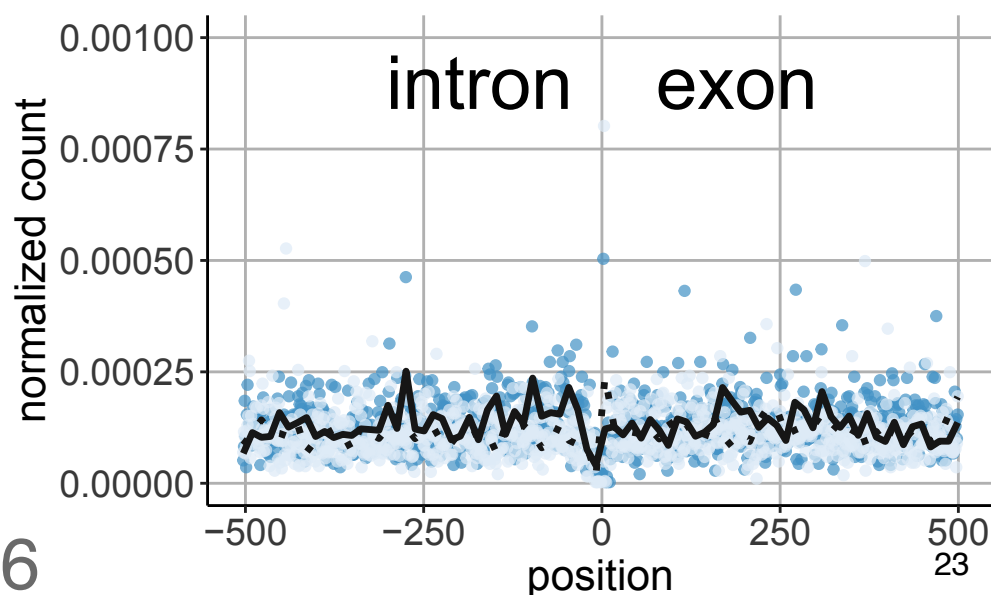



acceptor

RNPC3-GCAGUKUUAGGGY

•• antisense — sense    • antisense • sense

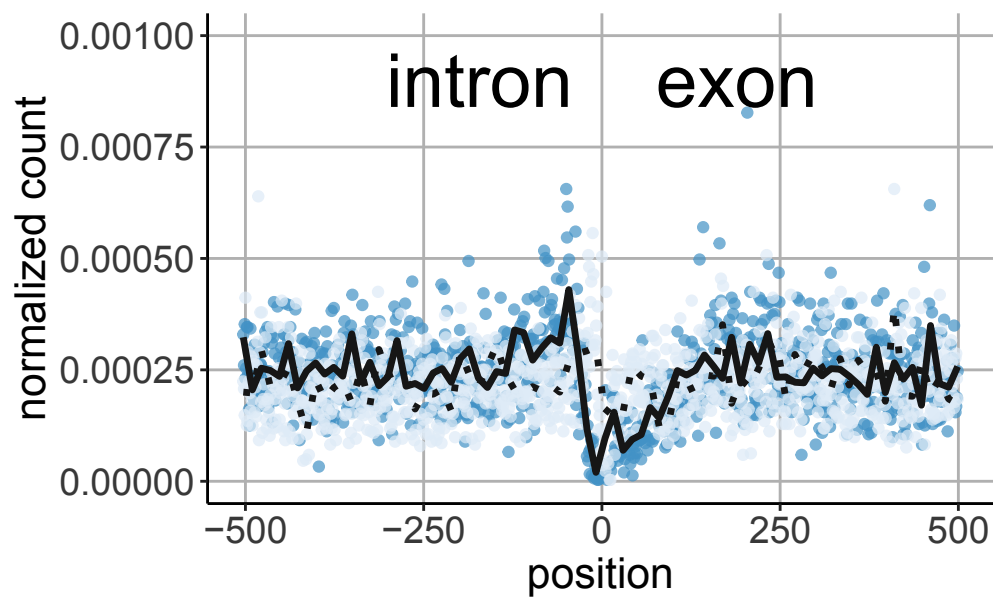

YBX1-RCCAYRHCAUCGY

•• antisense — sense    • antisense • sense

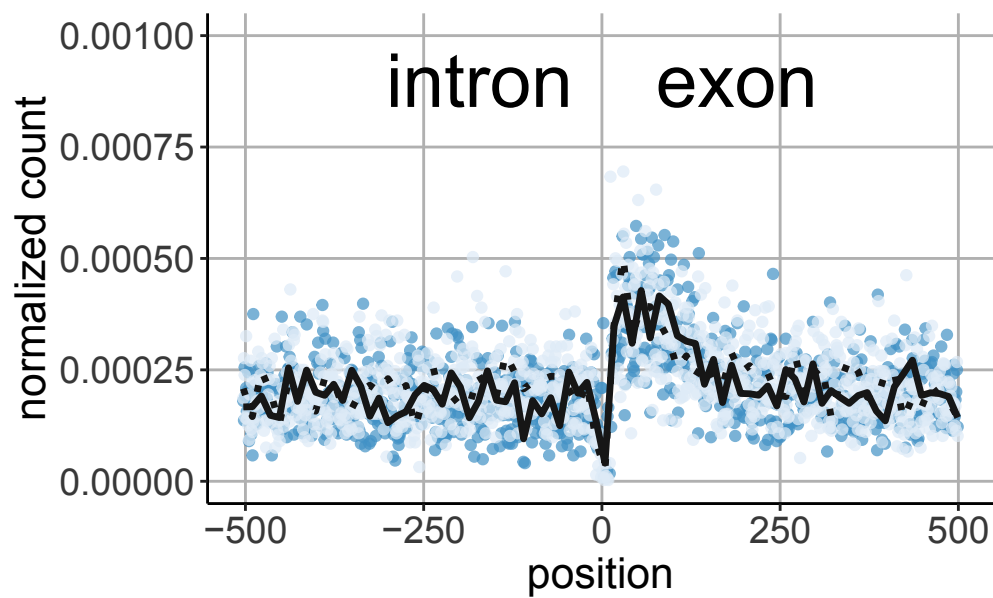

ZC3H12A-NGCAGGUAAGUGCN

•• antisense — sense    • antisense • sense

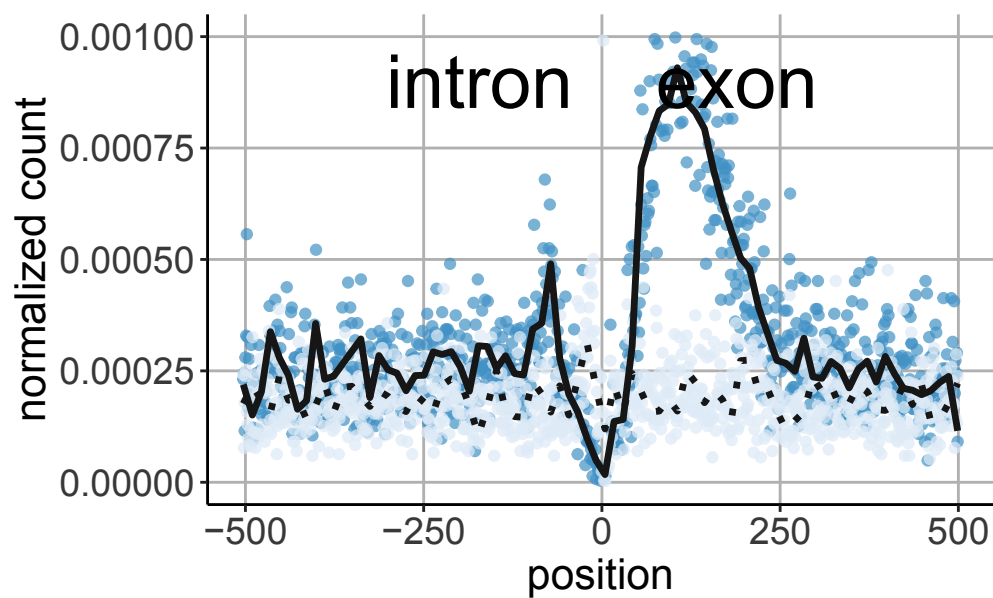

ZC3H12B-NGCAGGUAAGUGSN

•• antisense — sense    • antisense • sense

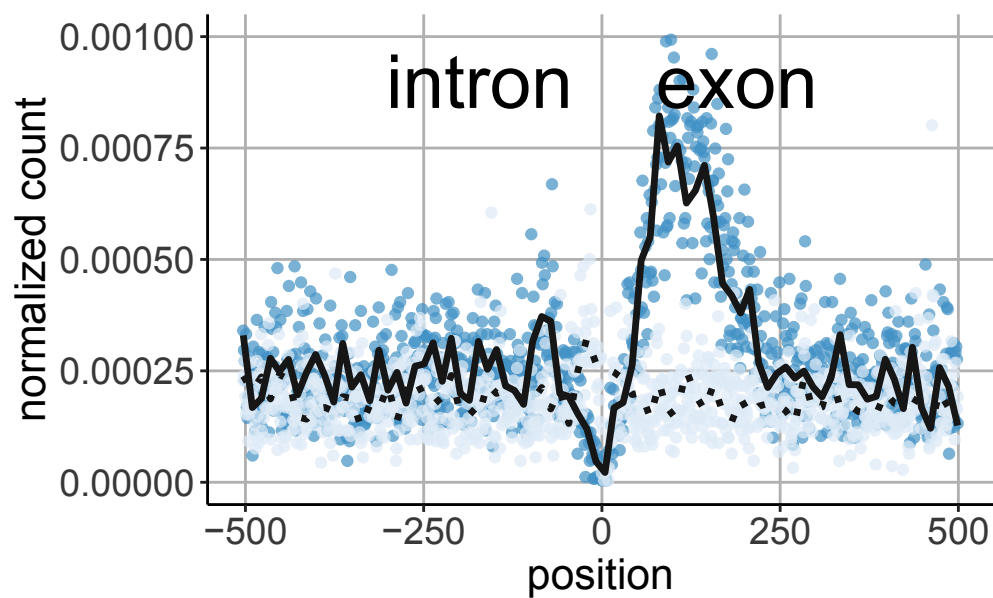

ZC3H12B-SCAGGUAUUAUGS

•• antisense — sense    • antisense • sense

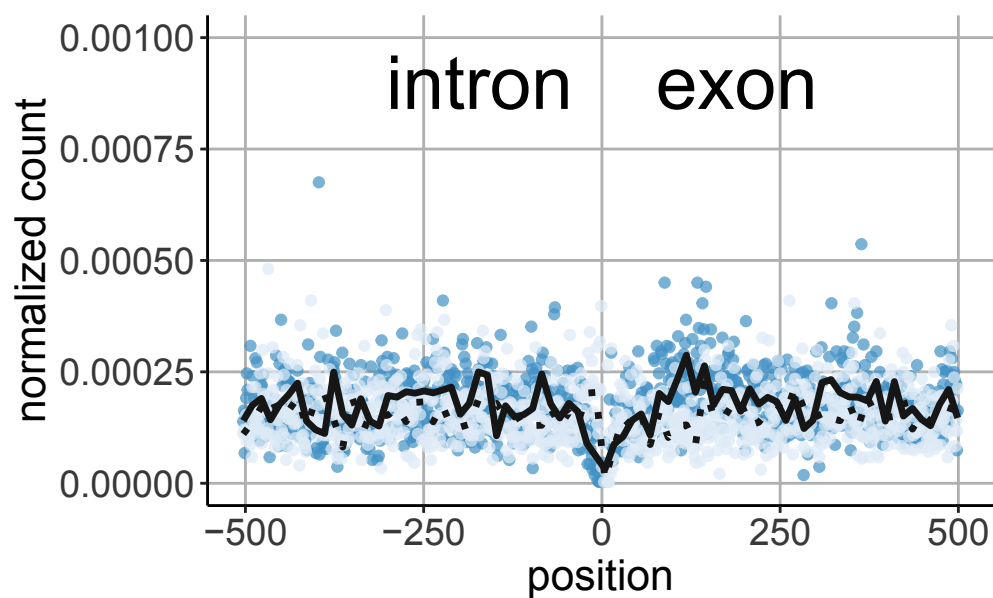

donor

ZC3H8-GCUUGC

• antisense — sense • antisense • sense

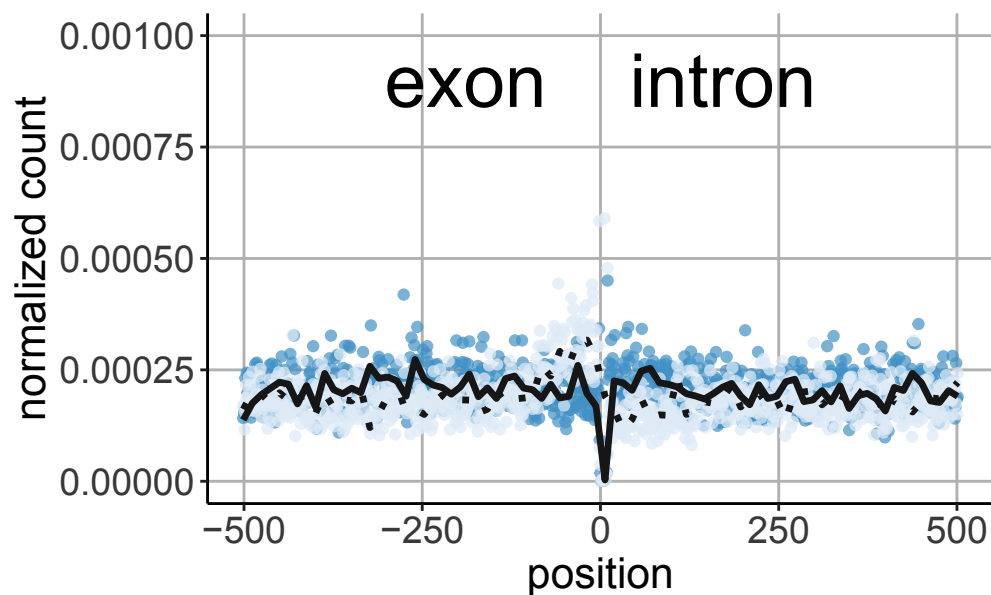

ESRP1\_3-GGUGUUGGUG

• antisense — sense • antisense • sense

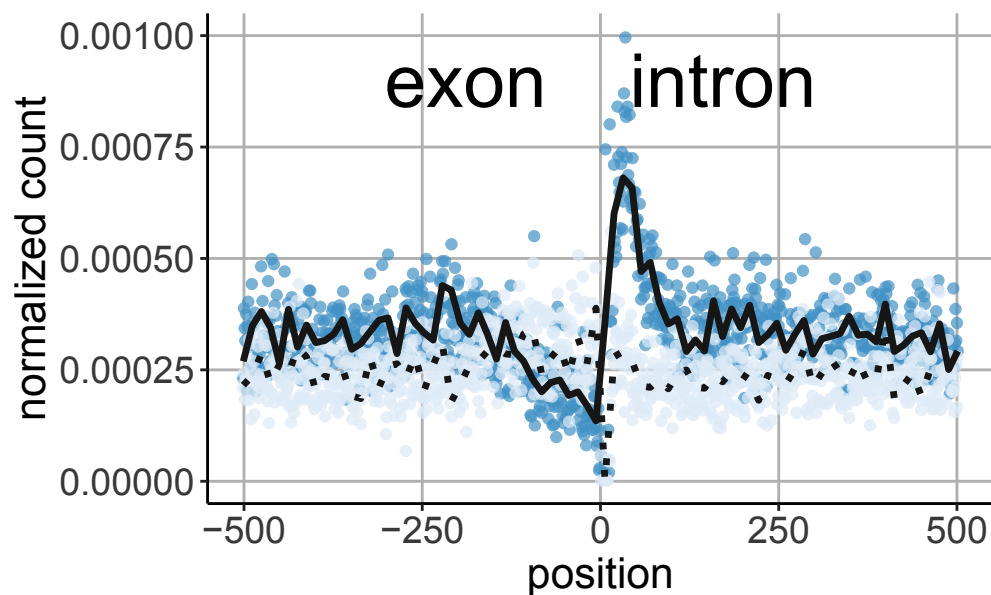

ELAVL3-GUUUUUG

• antisense — sense • antisense • sense

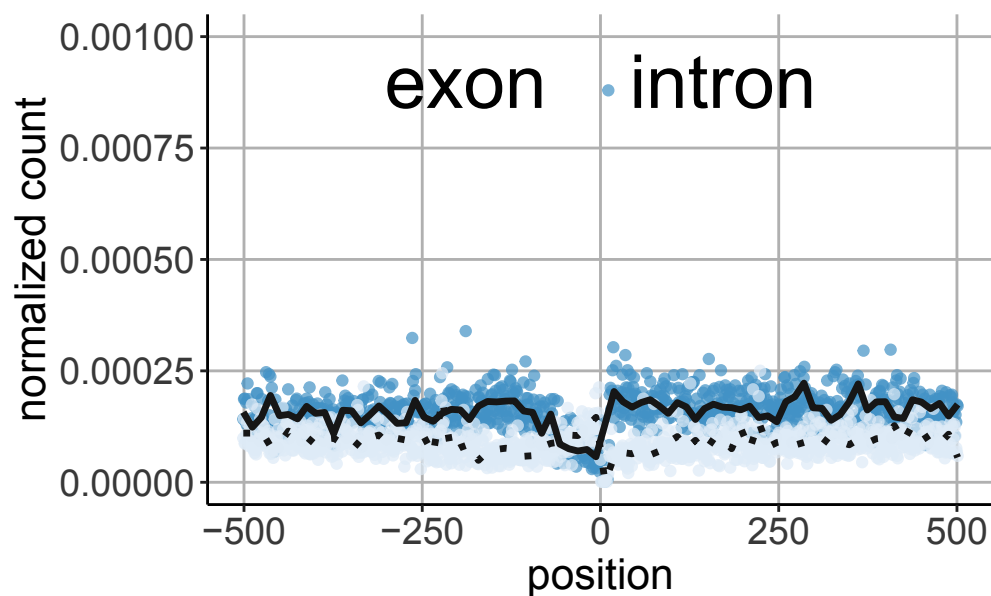

PUM1-NUGUAAAUAG

• antisense — sense • antisense • sense

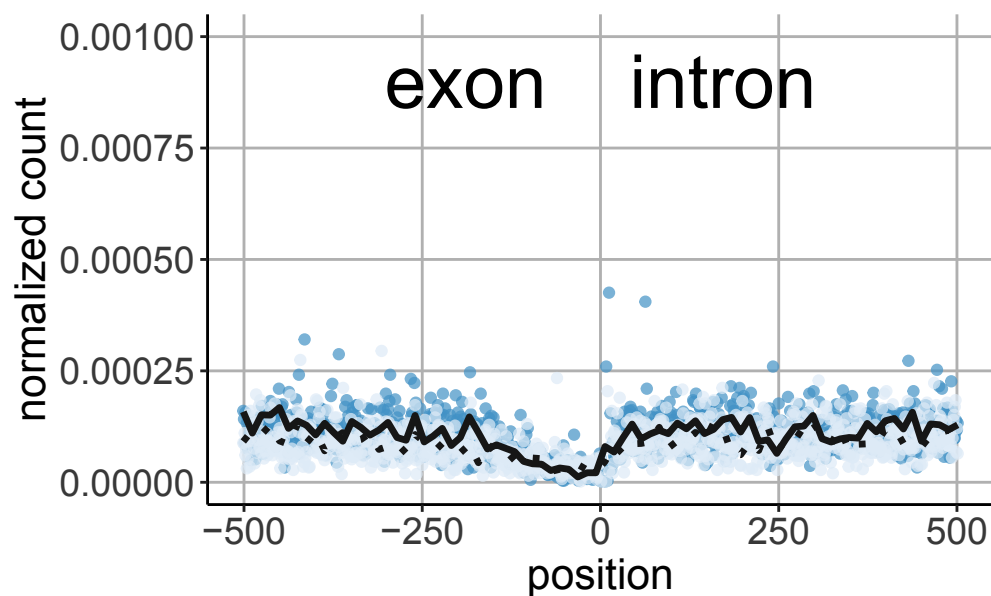

QKI-NUACUAACAWN

• antisense — sense • antisense • sense

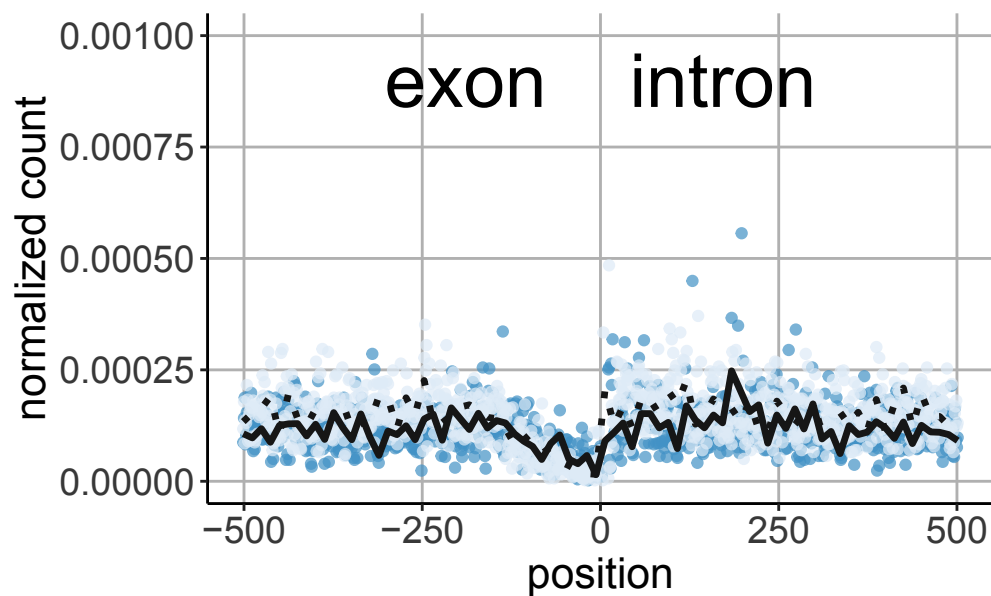

MCM3AP-CGCCAGUGCG

• antisense — sense • antisense • sense

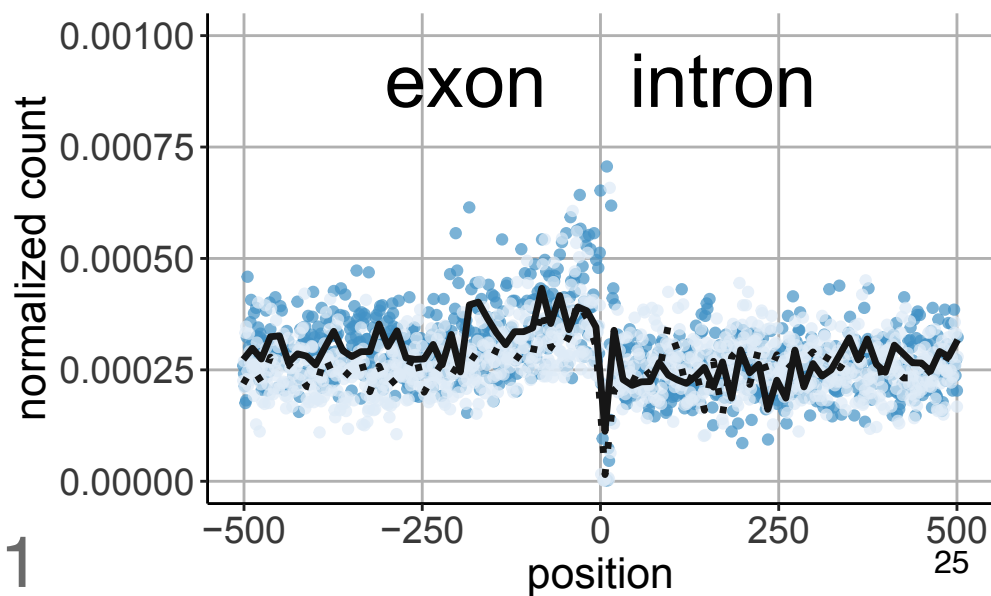

1

25

donor

HNRNPC-UUUUUGGUGG

• antisense — sense • antisense • sense

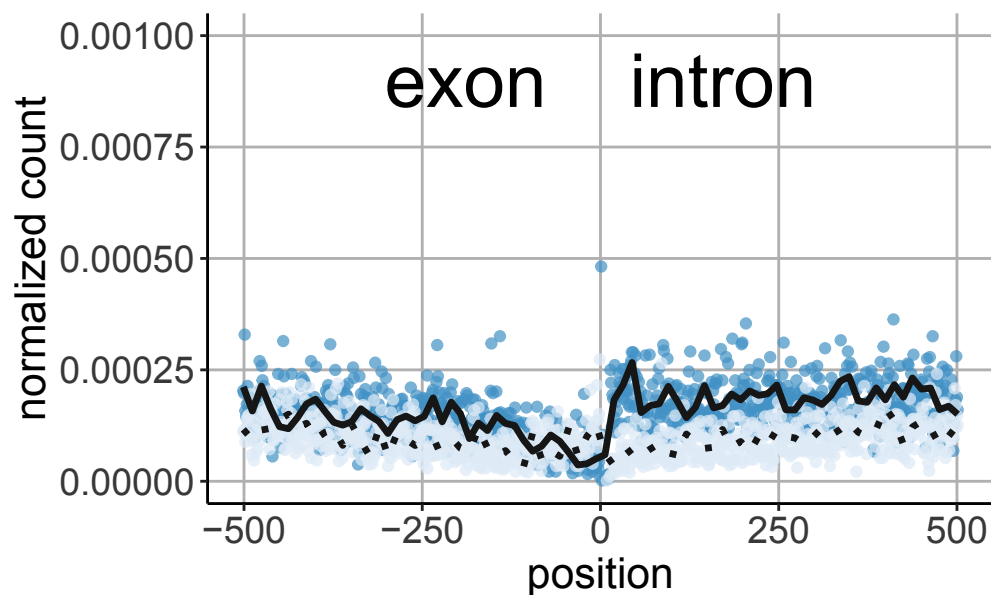

PABPC5-NUAKAAAKUURCN

• antisense — sense • antisense • sense

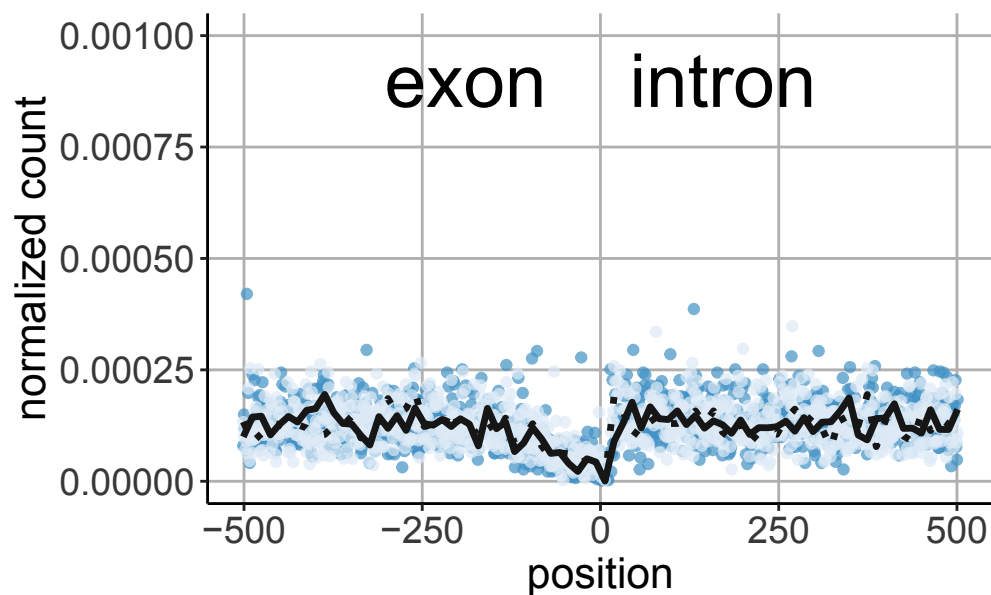

PABPC5-NUAKAAAUUACUACAN

• antisense — sense • antisense • sense

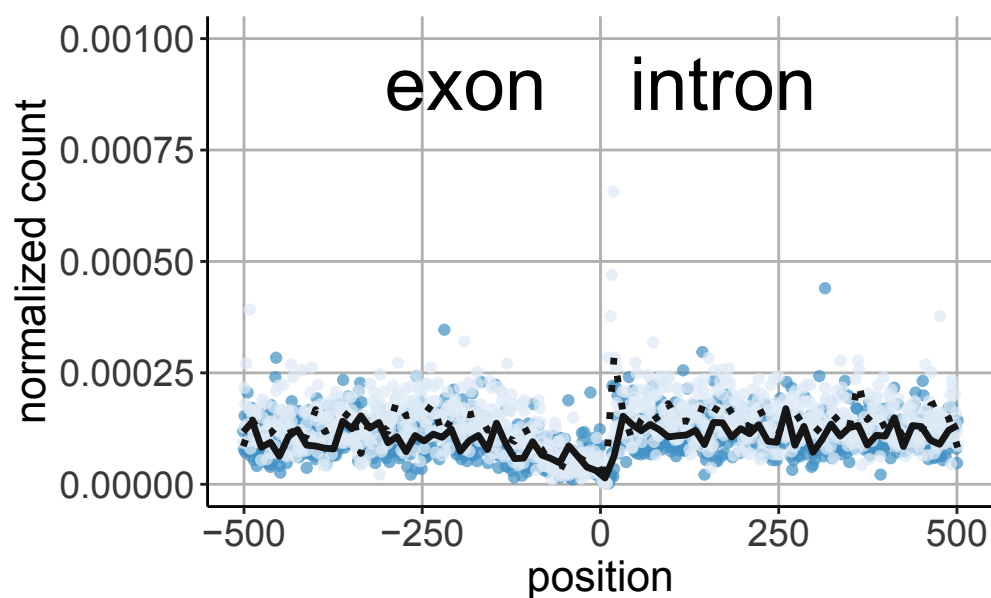

LARP7\_4-GRUCGUGAUGN

• antisense — sense • antisense • sense

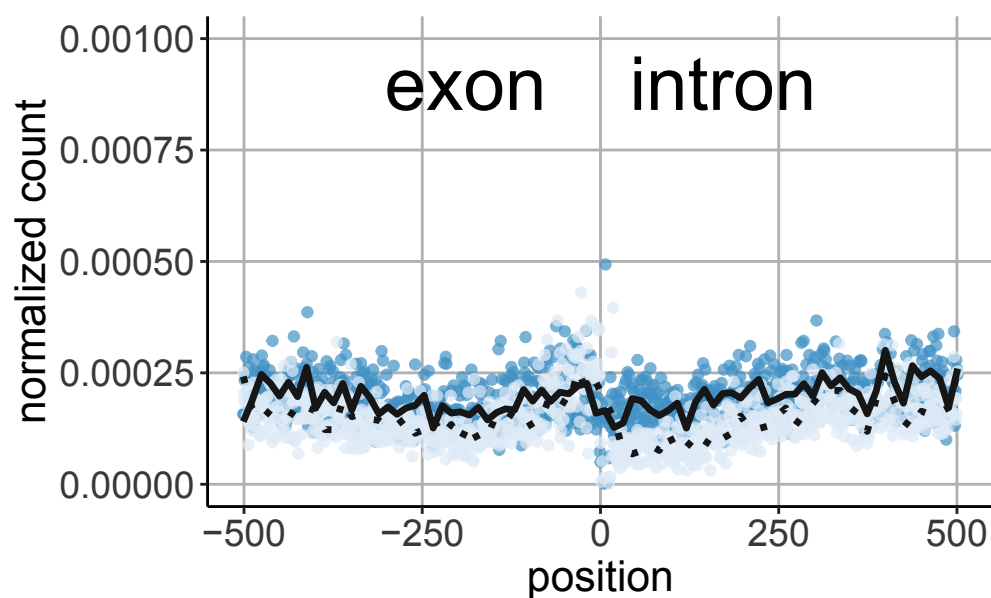

ZCRB1-GUAUUAAGGG

• antisense — sense • antisense • sense

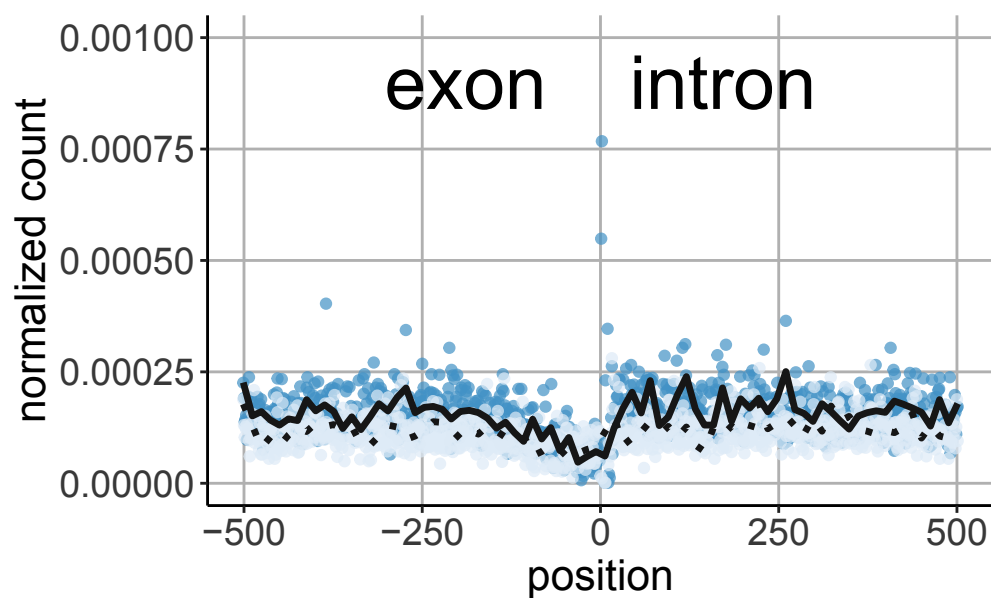

ZCRB1-GUGGACUUAANN

• antisense — sense • antisense • sense

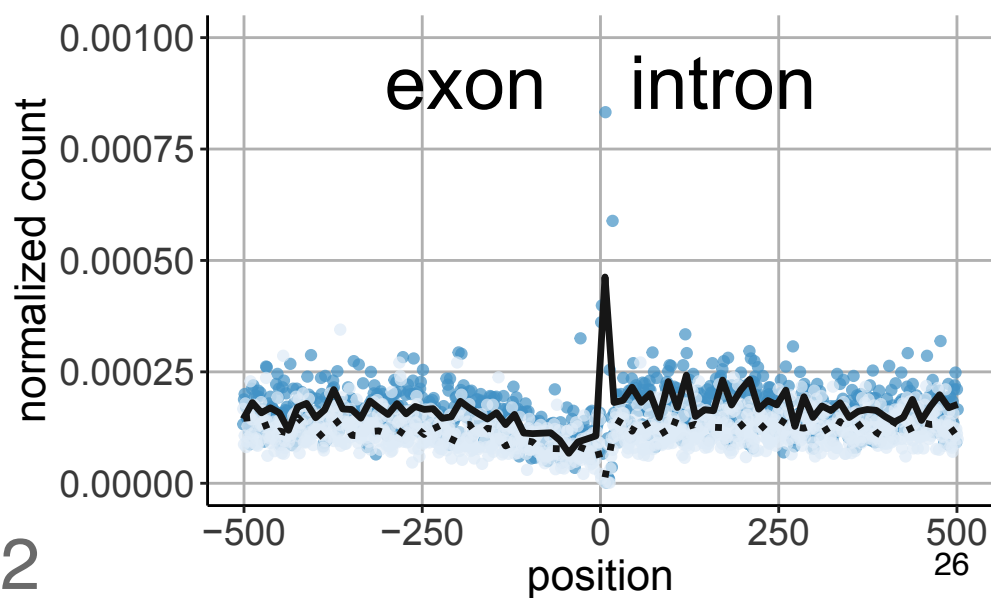

donor

RBM42-NGGAACUAAN

KHDRBS1-UAAUAGN

• antisense — sense • antisense • sense

• antisense — sense • antisense • sense

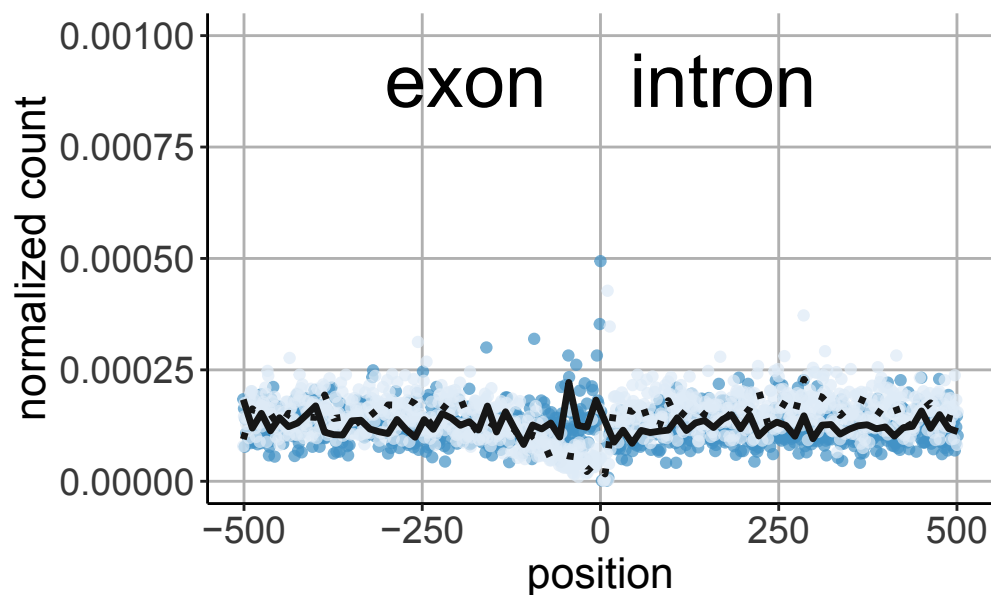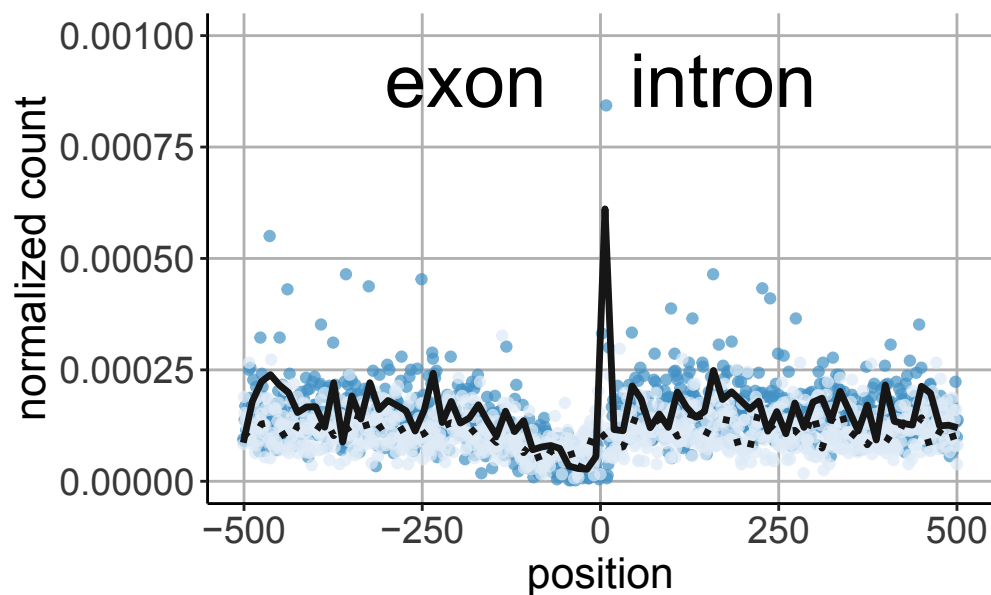

HNRNPCL1-GUUUUUUGGG

ZFR\_4-GUGACGGAUG

• antisense — sense • antisense • sense

• antisense — sense • antisense • sense

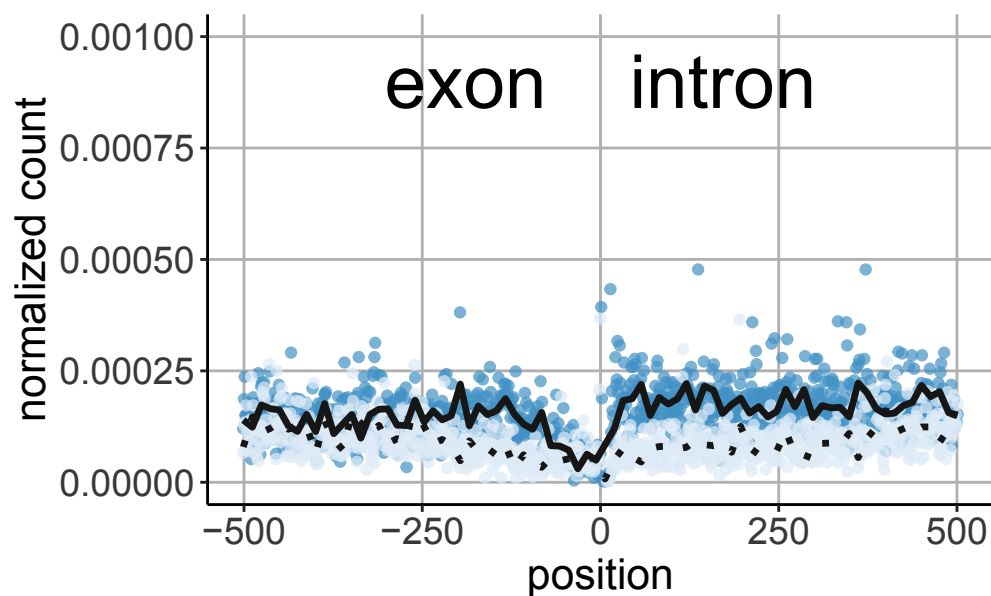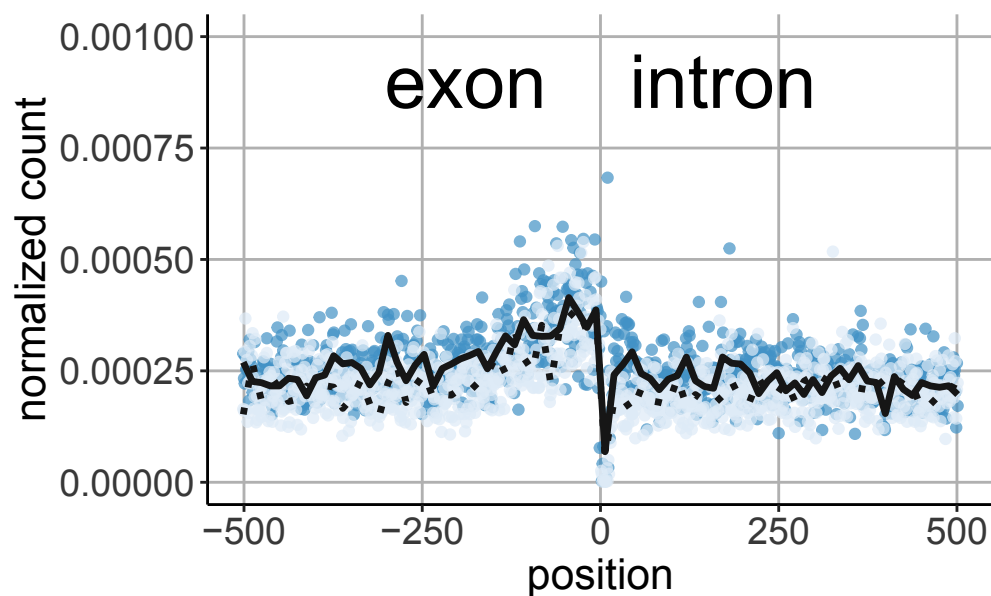

ZFR\_4-GUGC GGAUGN

HNRPLL-GCAURCAYCC

• antisense — sense • antisense • sense

• antisense — sense • antisense • sense

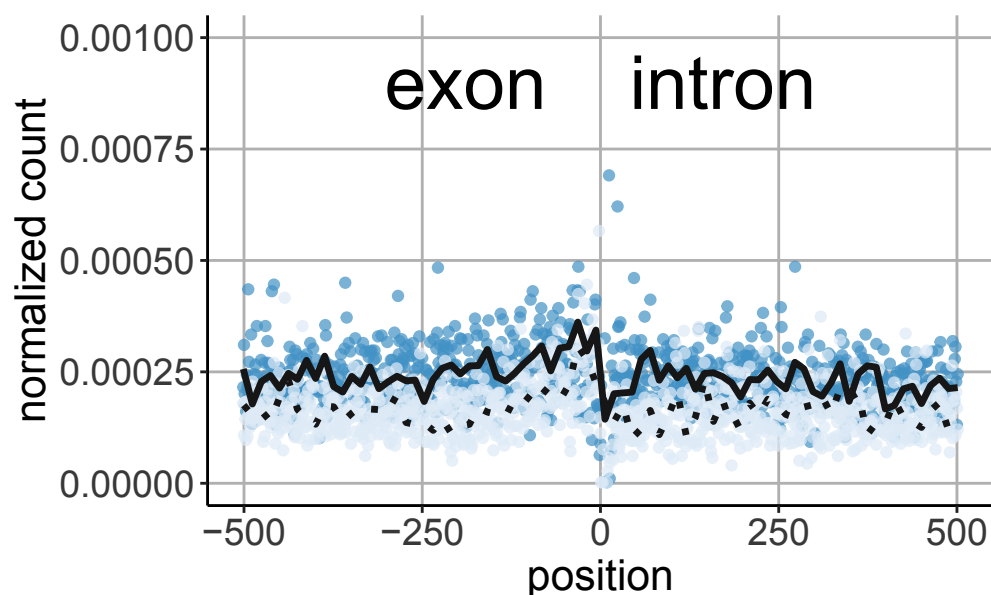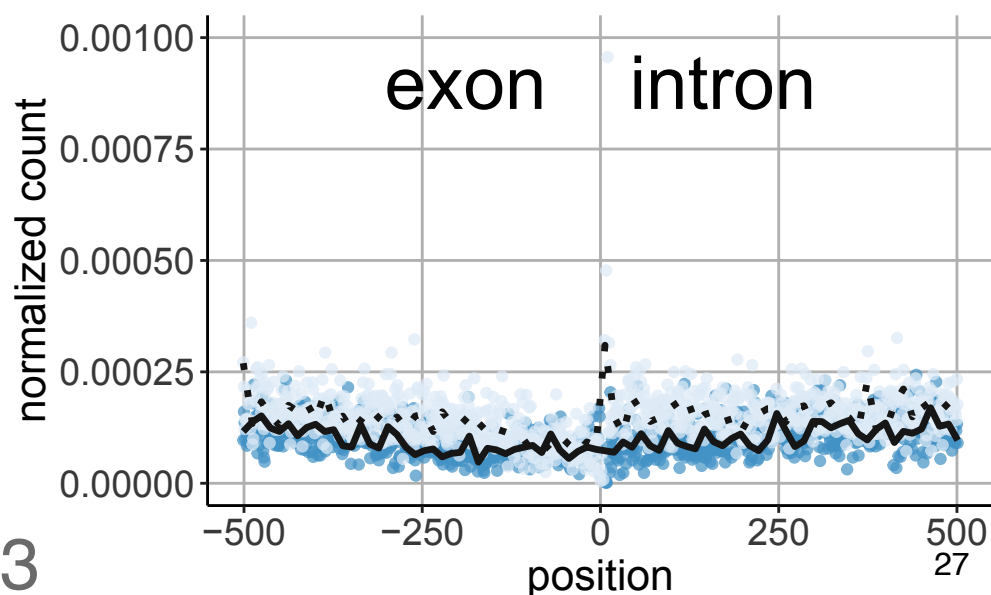

donor

ZC3H12C-NUGCGNCAGUCGGUAGC

• antisense — sense • antisense • sense

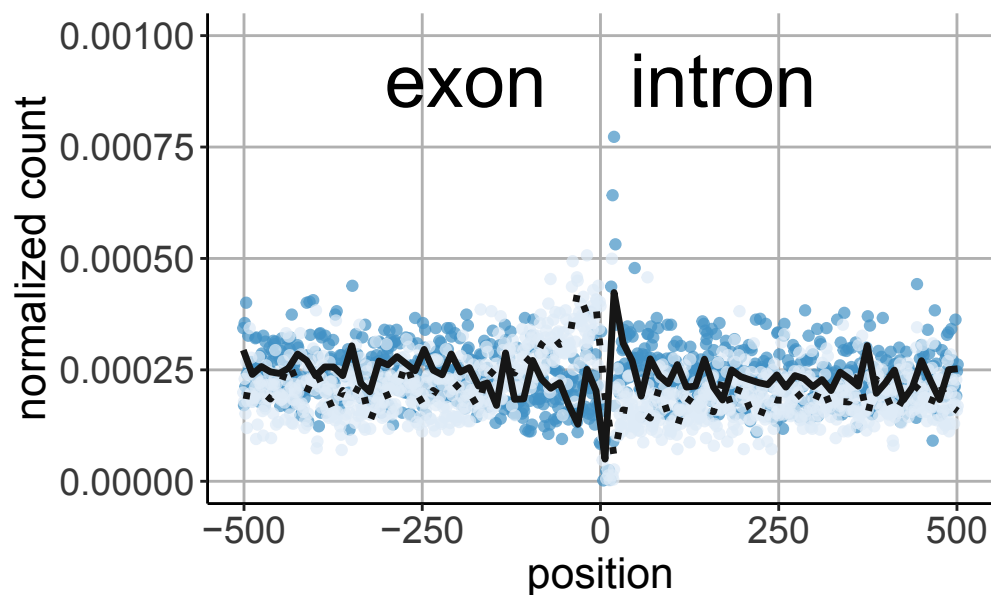

HNRNPL\_2-ACAUWWCAUW

• antisense — sense • antisense • sense

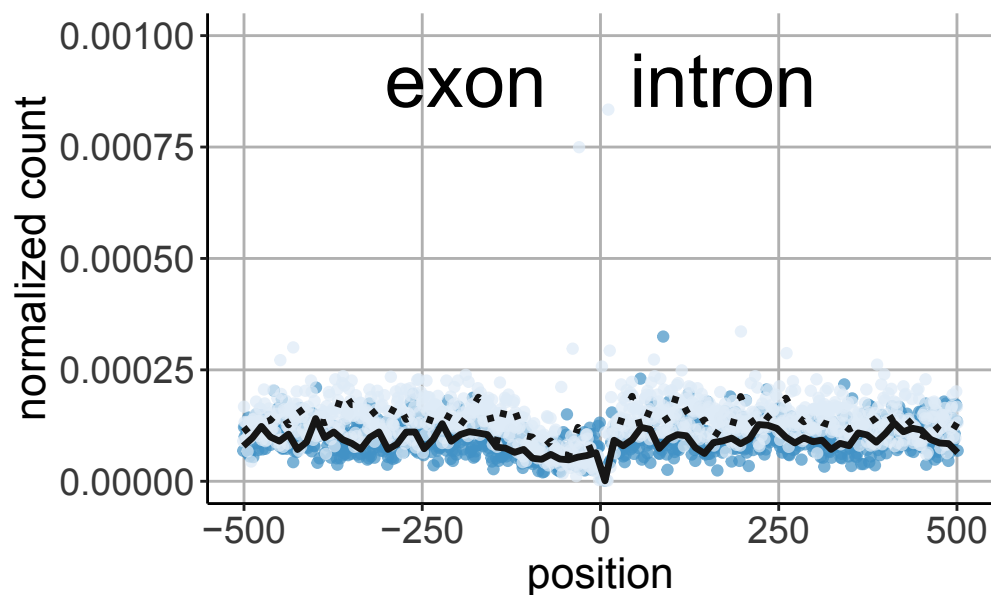

RBMS2-CAGUGAUUGG

• antisense — sense • antisense • sense

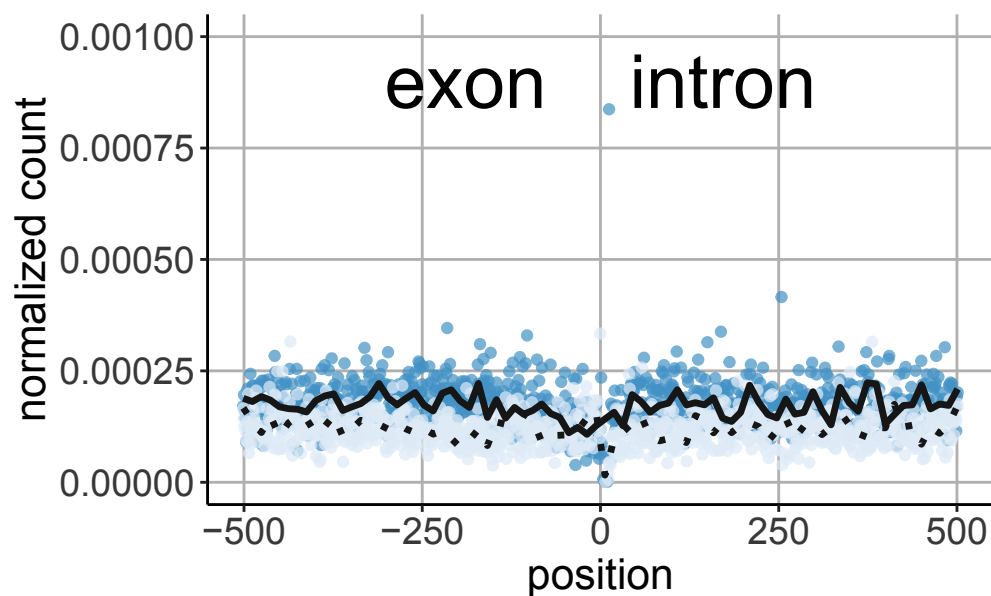

RBM14-GGKUGCGUCG

• antisense — sense • antisense • sense

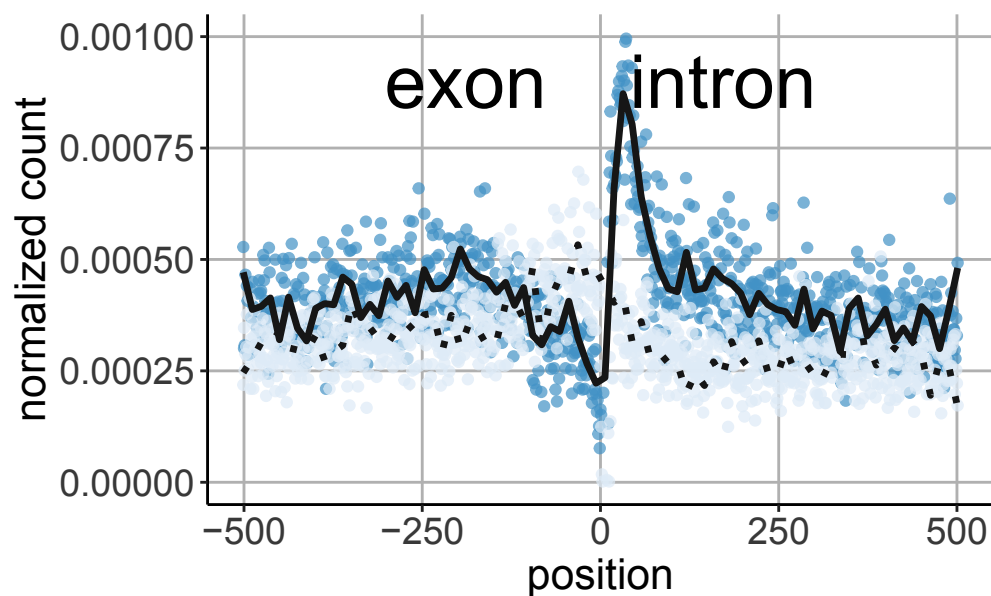

RBMS2-CGUAUAUAG

• antisense — sense • antisense • sense

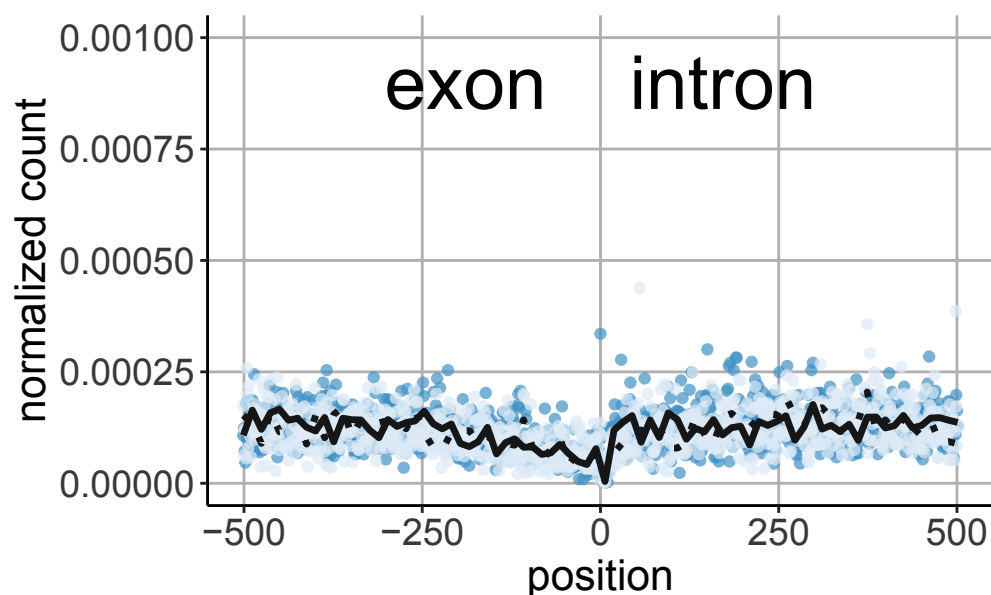

RBMS1-GUAUUUAKNGGG

• antisense — sense • antisense • sense

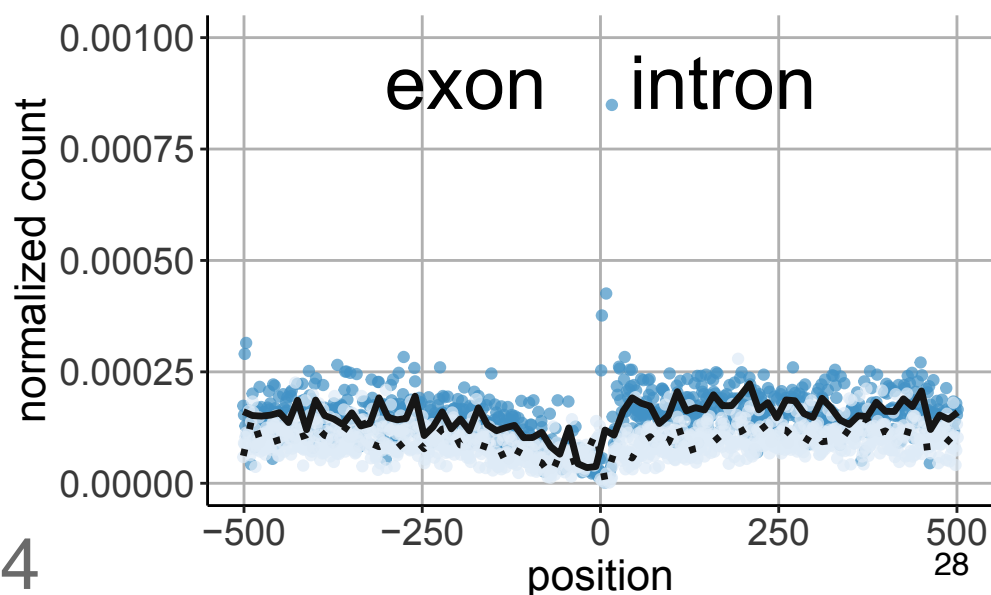

donor

RBMS1-UUAUAAUCAAC

• antisense — sense • antisense • sense

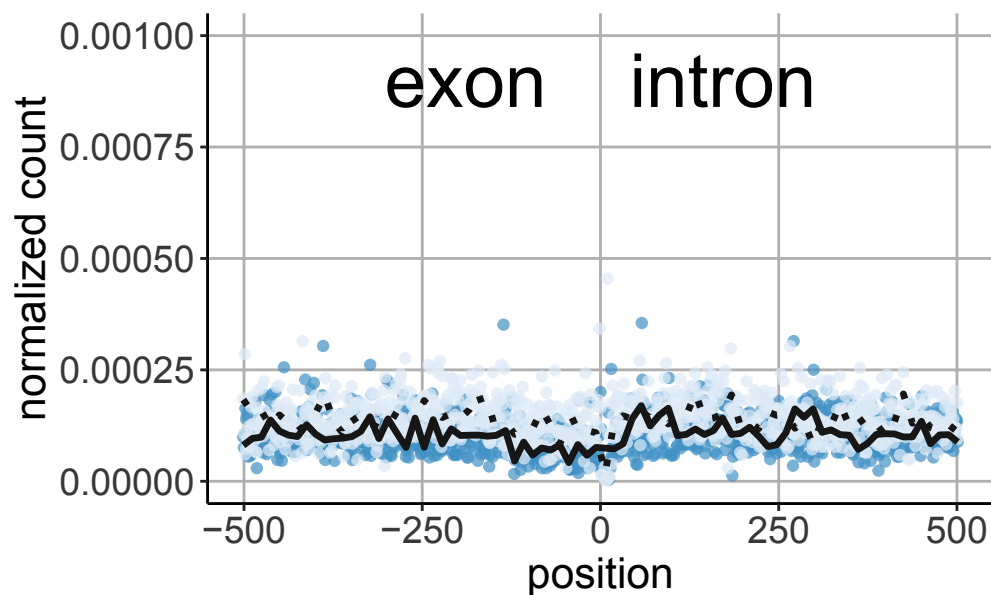

NOVA2\_3-UCAUUCAU

• antisense — sense • antisense • sense

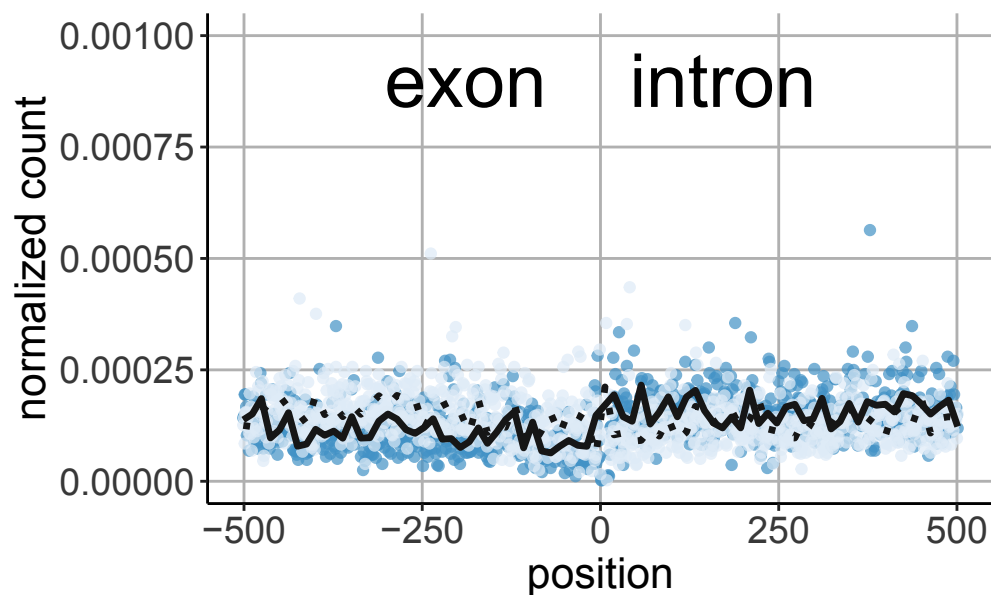

ZFP36-KUAUUUAUGGUGG

• antisense — sense • antisense • sense

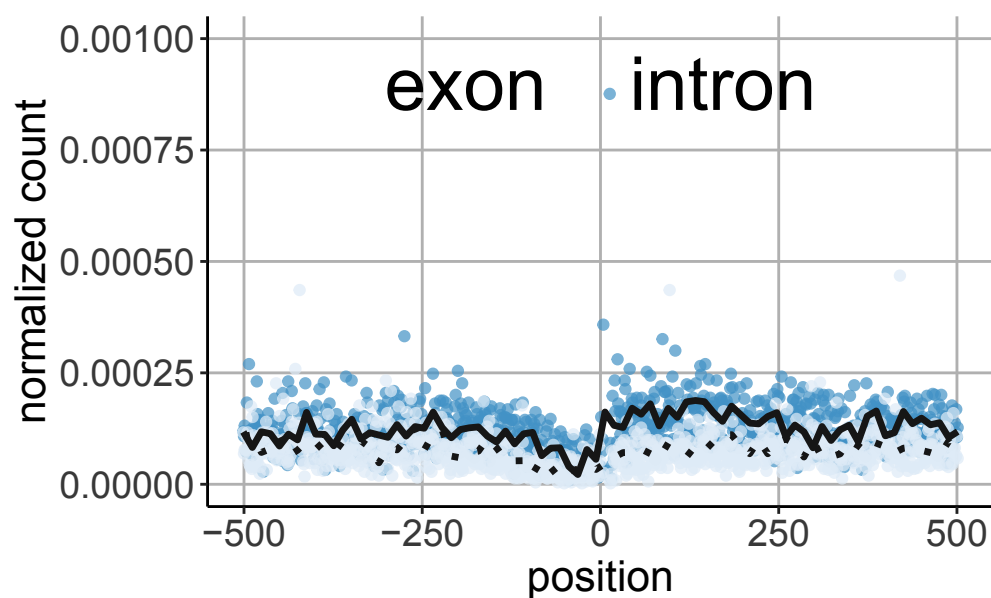

ZFP36-UUAUUUAUU

• antisense — sense • antisense • sense

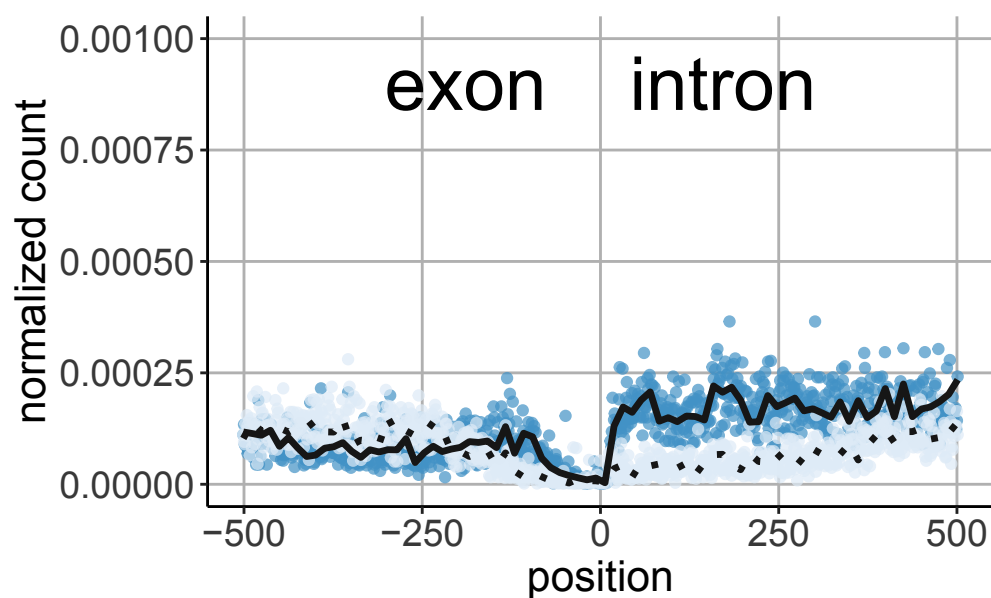

ELAVL4-UUUUAUUUUUG

• antisense — sense • antisense • sense

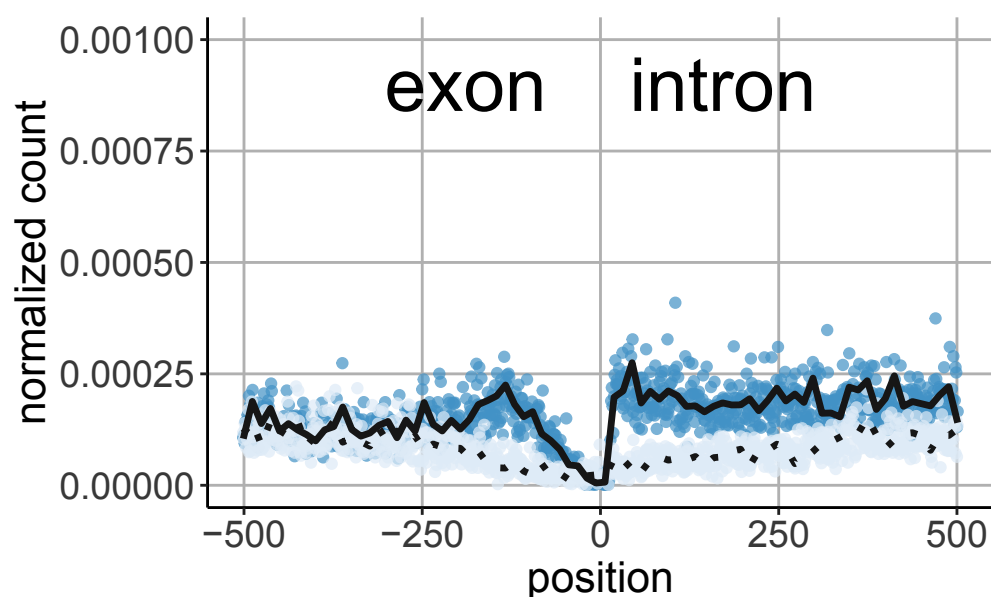

QKI-ACUAACANNACUAACA

• antisense — sense • antisense • sense

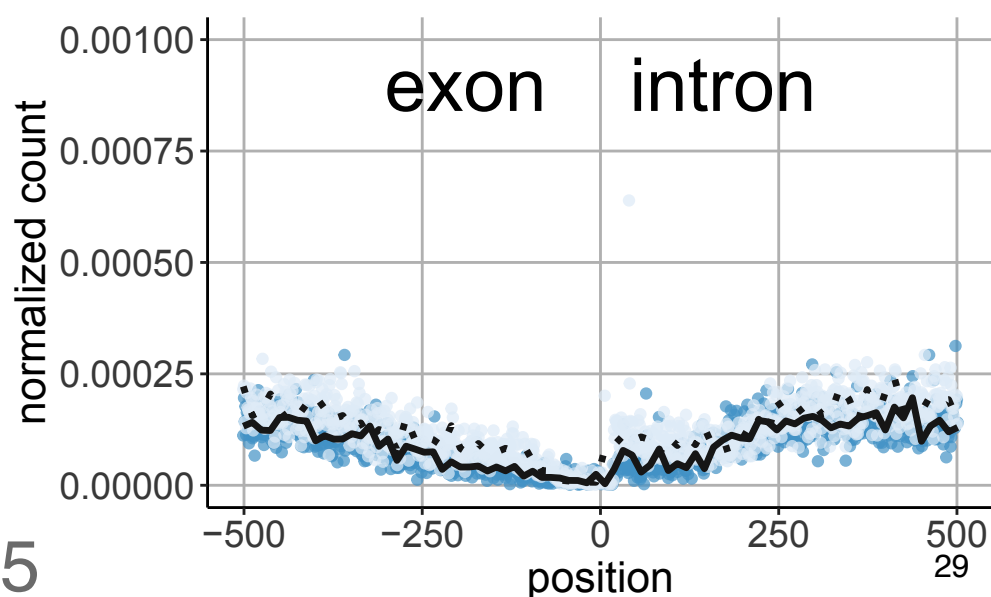

donor

TARDBP-GUGUGAAUGG

• antisense — sense • antisense • sense

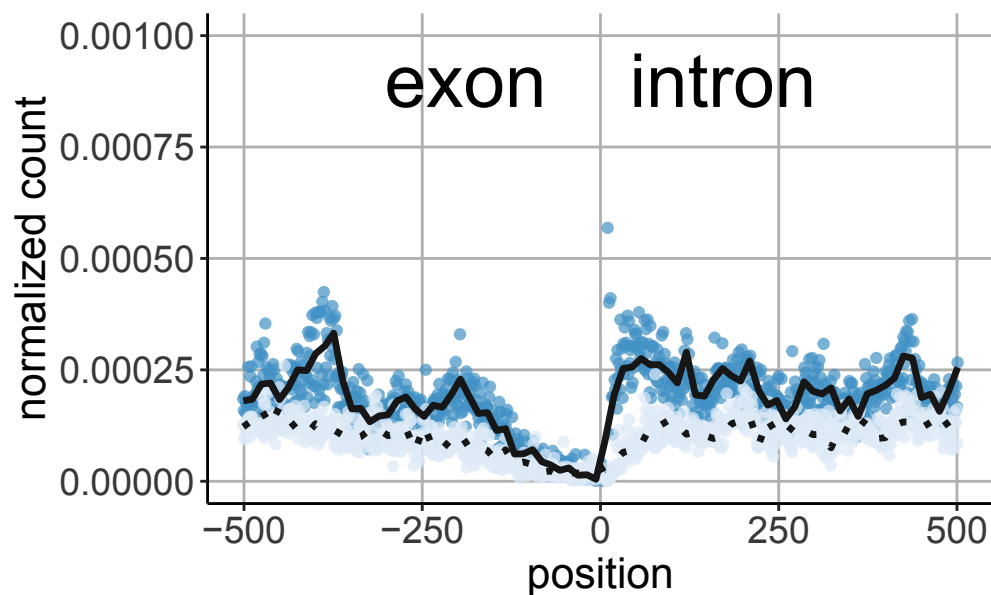

TARDBP-GUGUGNGUGUG

• antisense — sense • antisense • sense

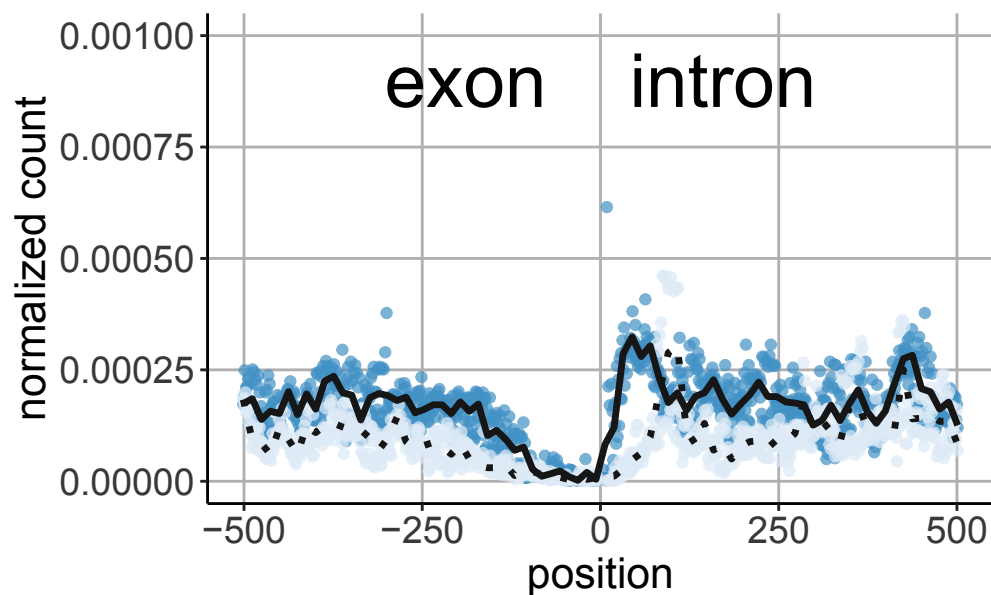

PUM2-NNUGUAYAGK

• antisense — sense • antisense • sense

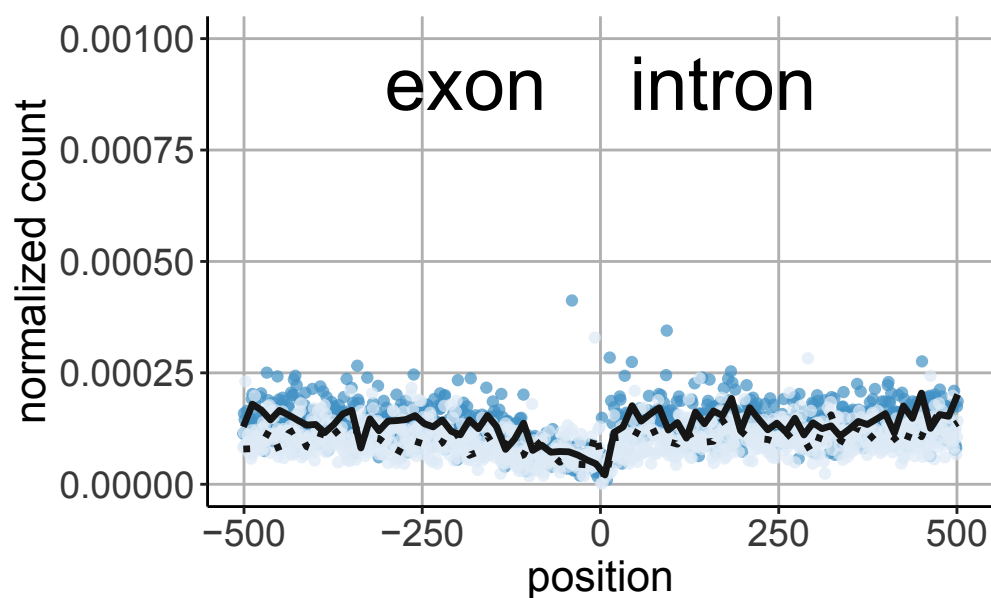

PUM2-NUGUAAAUAGKN

• antisense — sense • antisense • sense

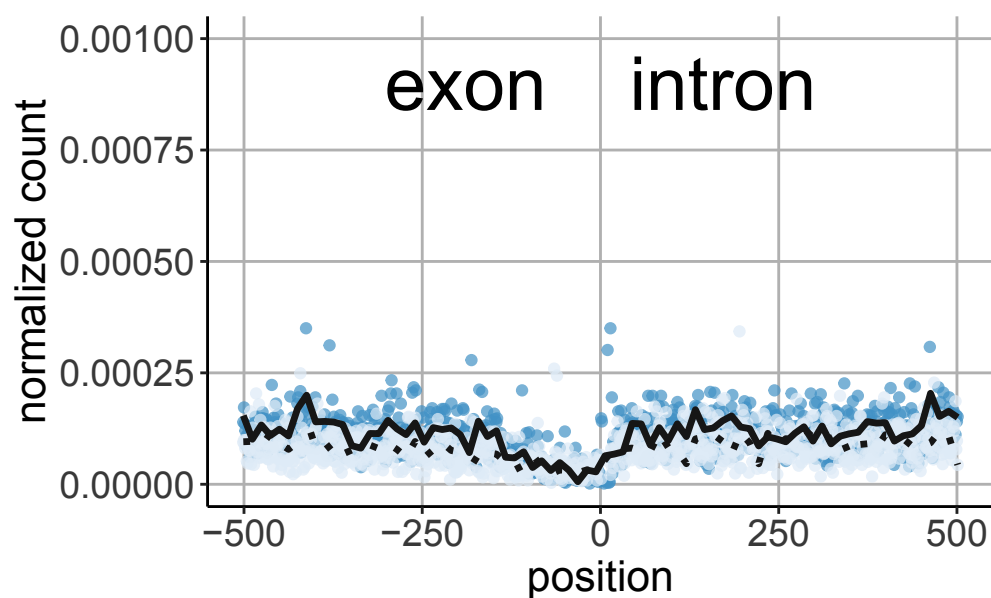

KHDRBS3-UAAANNNNNNNUAAA

• antisense — sense • antisense • sense

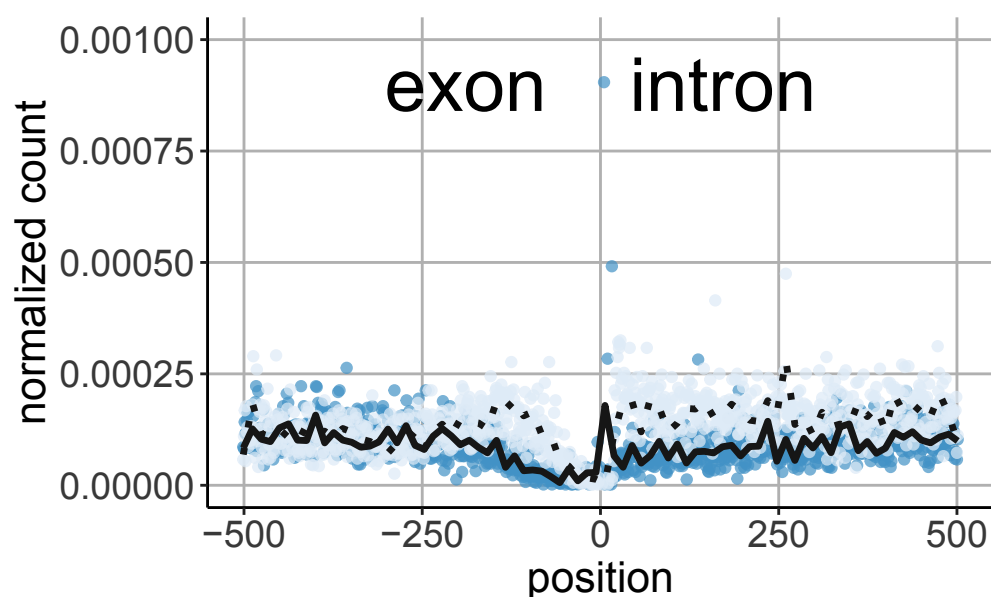

THUMPD1-UUCGUGGCUUG

• antisense — sense • antisense • sense

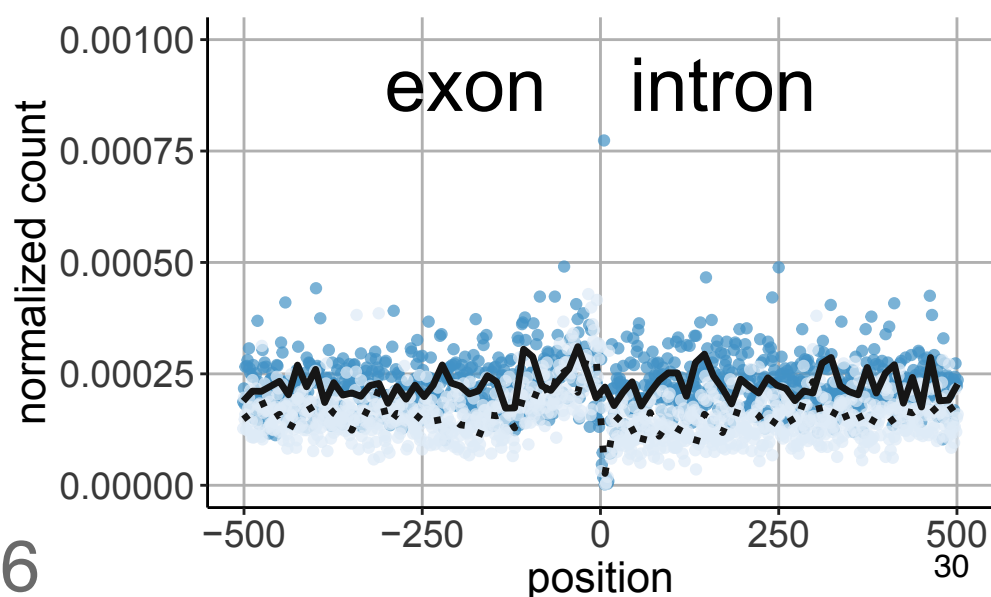

donor

THUMPD1-WGCGCGGUYUU

•• antisense — sense    • antisense • sense

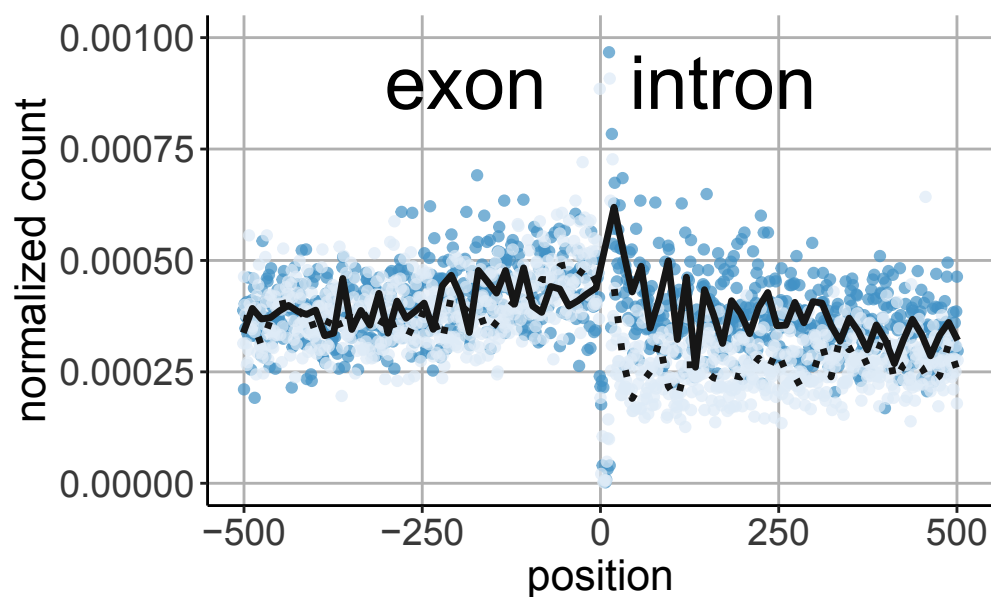

ZFR\_4-GGCACGGAUG

•• antisense — sense    • antisense • sense

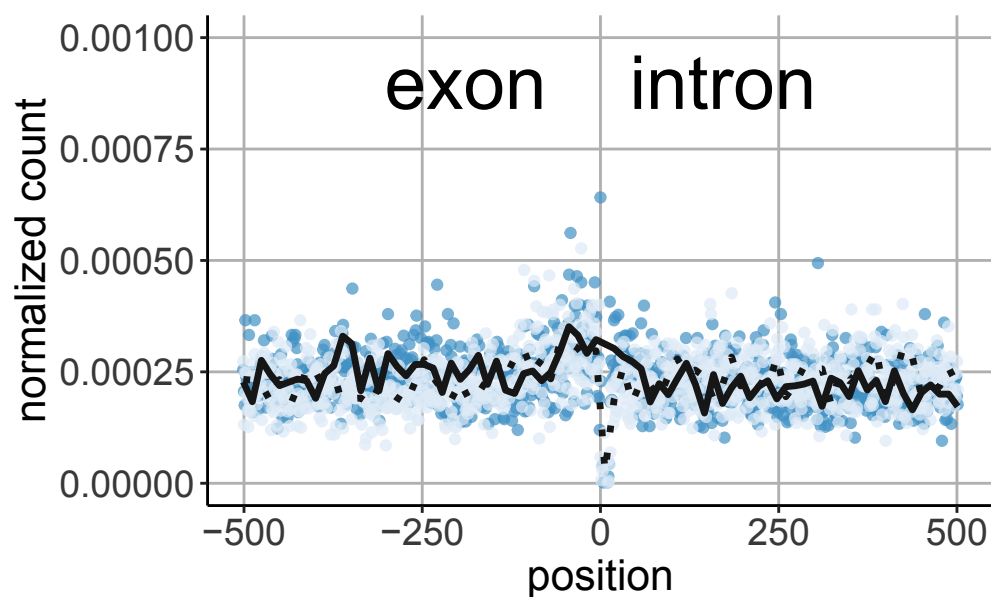

ZFR\_4-UUGCCGGAUGYCGU

•• antisense — sense    • antisense • sense

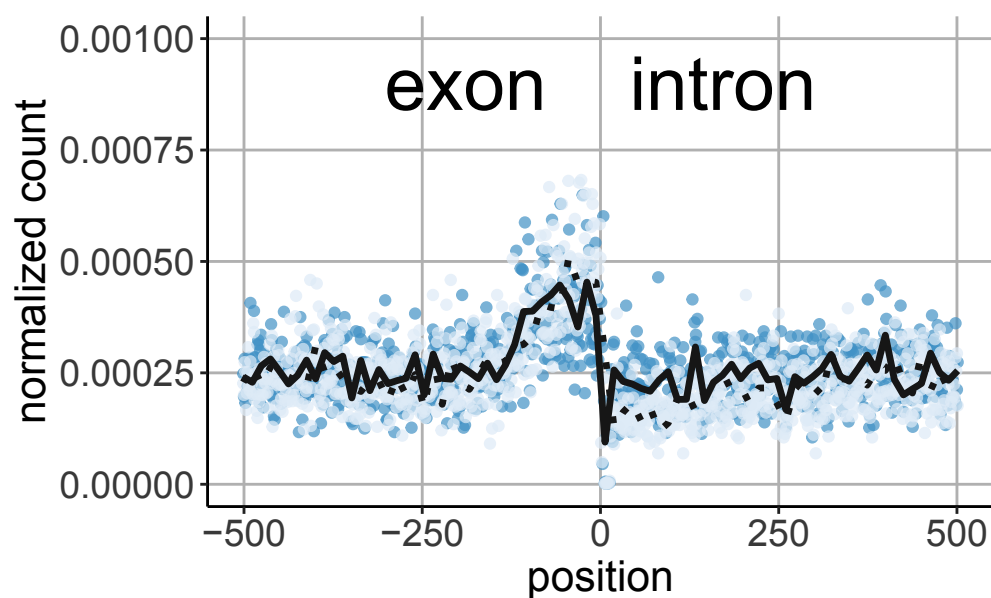

PCBP1-UCCUUNNCCUU

•• antisense — sense    • antisense • sense

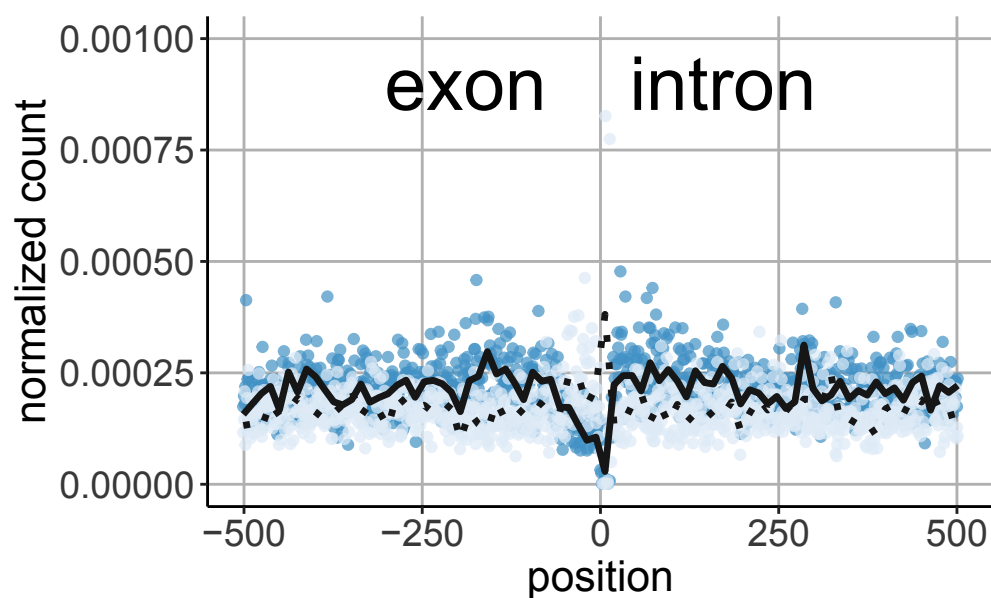

HNRNPA3-UAGGUAAGGG

•• antisense — sense    • antisense • sense

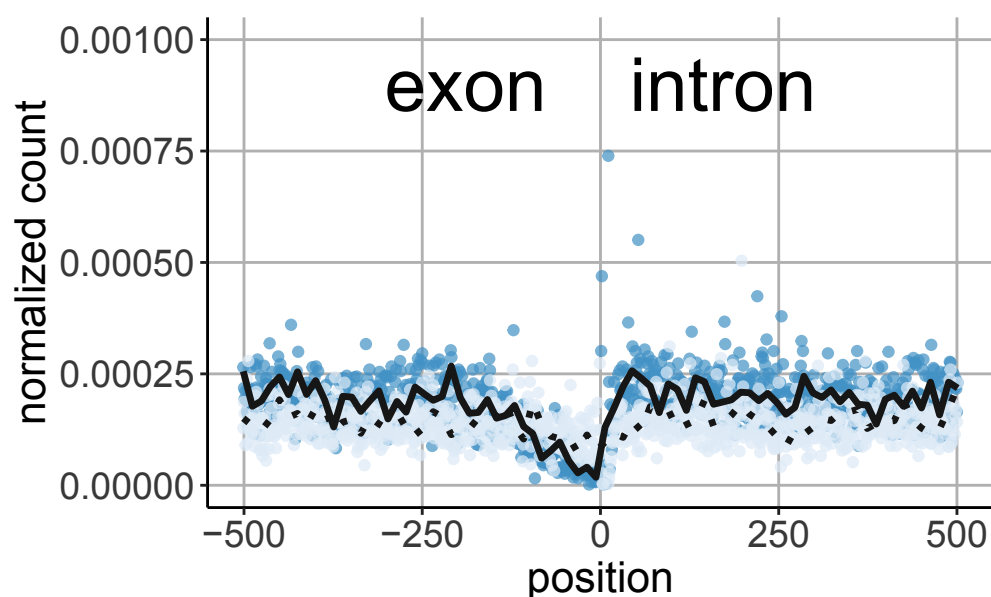

RBM38-KKGUGUGUGUGUKK

•• antisense — sense    • antisense • sense

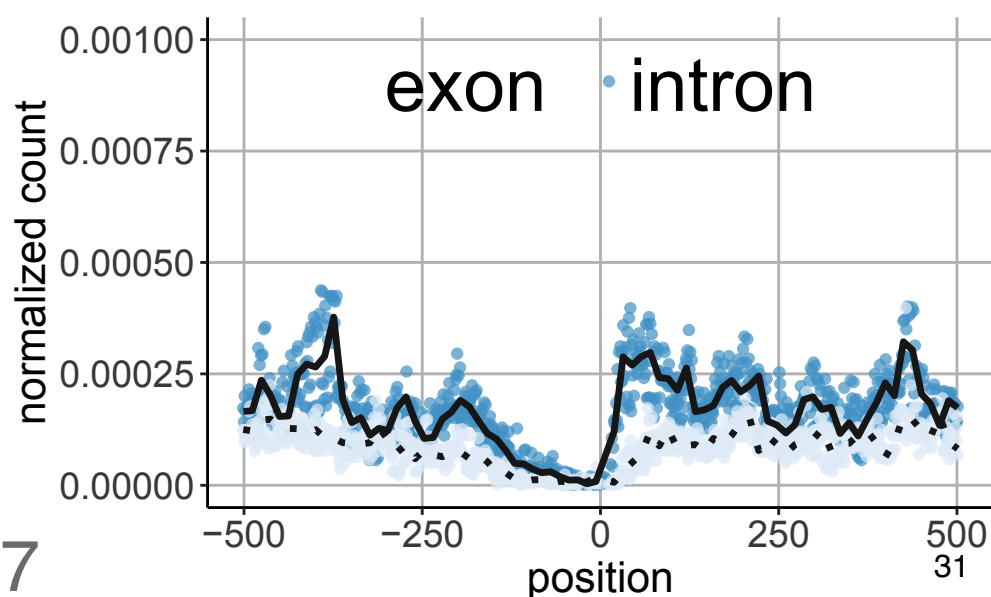



donor

MEX3D-UNURUUUAUU

RBPM52-CACAGNGCACA

• antisense — sense • antisense • sense

• antisense — sense • antisense • sense

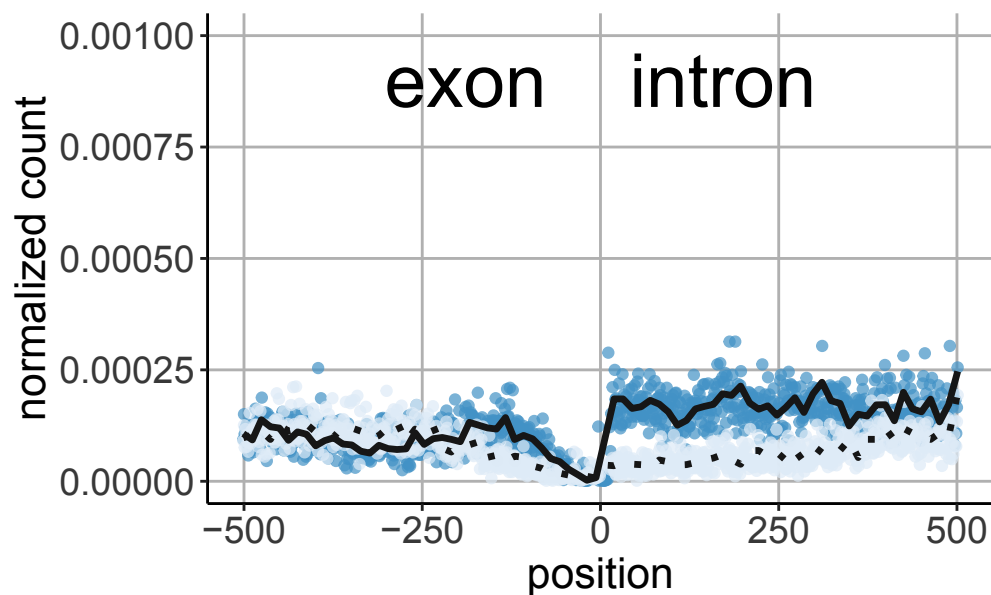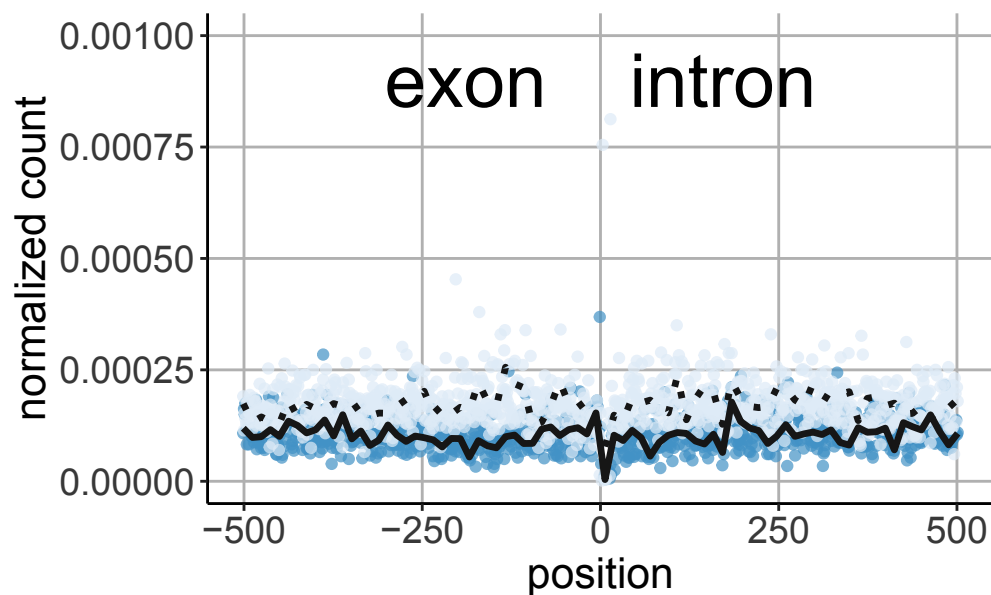

RBPM52-UCACRUGCACA

RBPM52-UGCACA

• antisense — sense • antisense • sense

• antisense — sense • antisense • sense

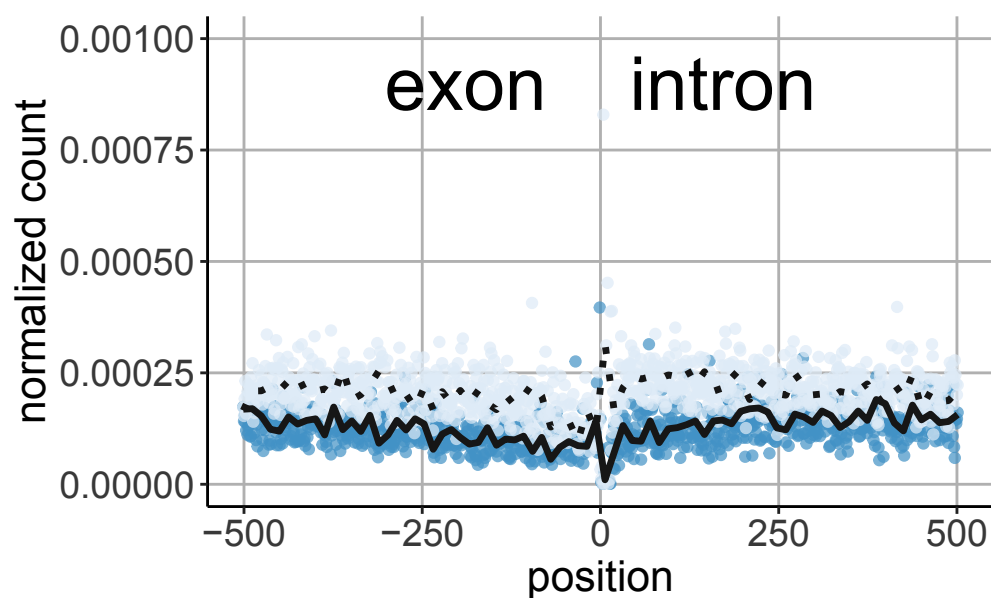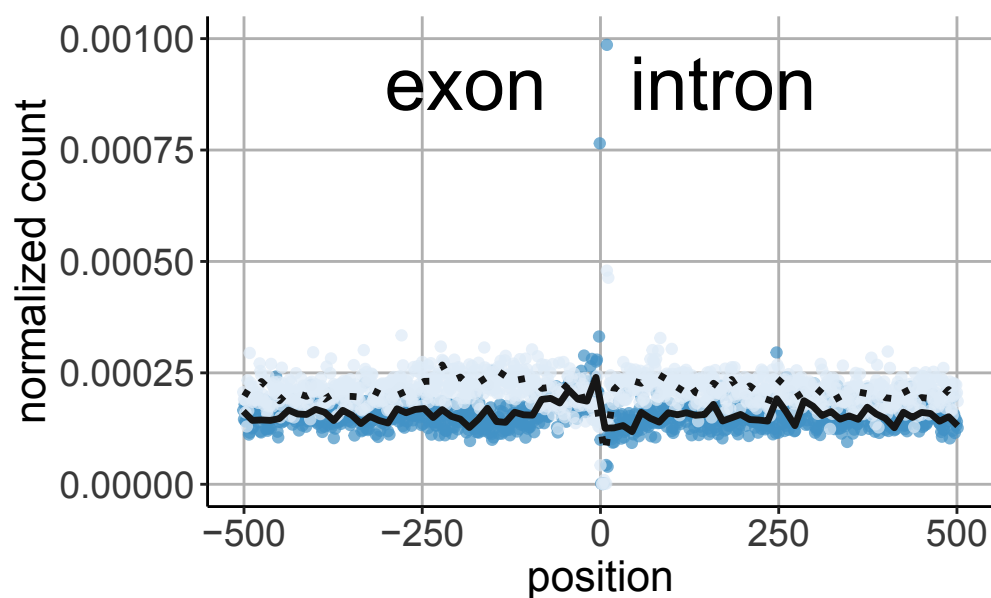

YBX2-GCCAUNNNAUCGC

YBX2-NUAACAUCNN

• antisense — sense • antisense • sense

• antisense — sense • antisense • sense

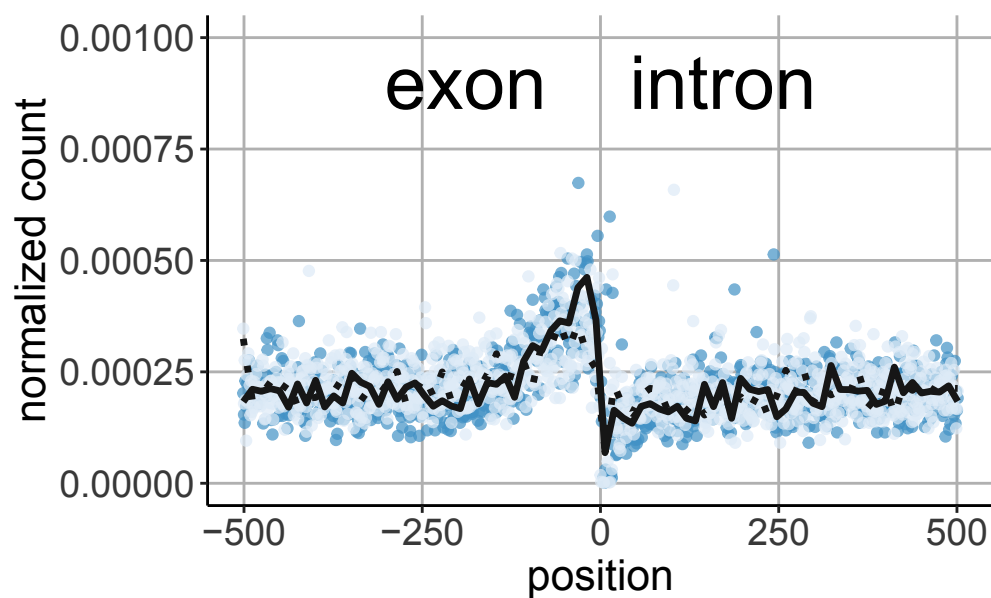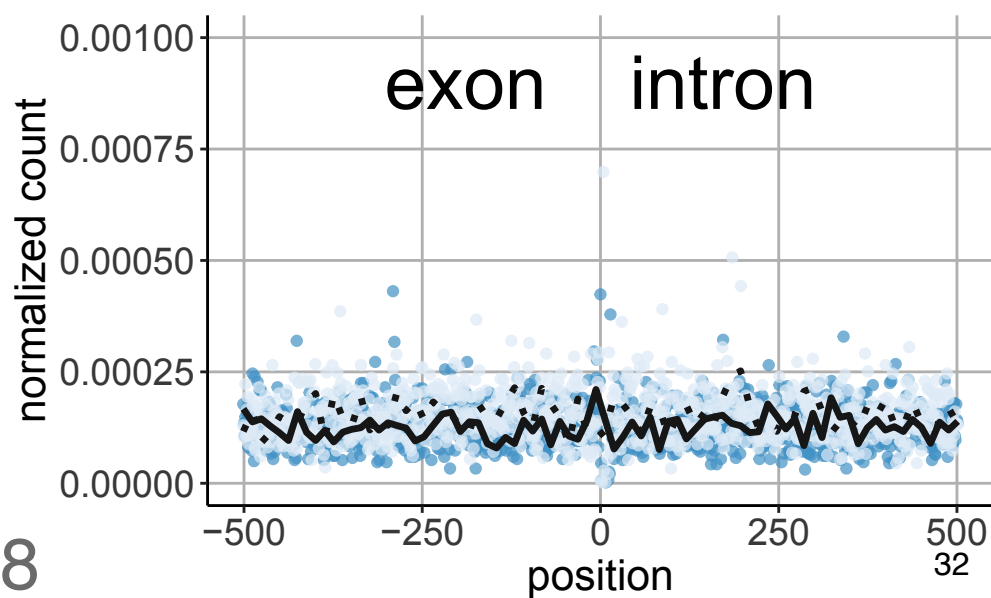

donor

CSTF2T-CGUAGCGUCU

• antisense — sense    • antisense • sense

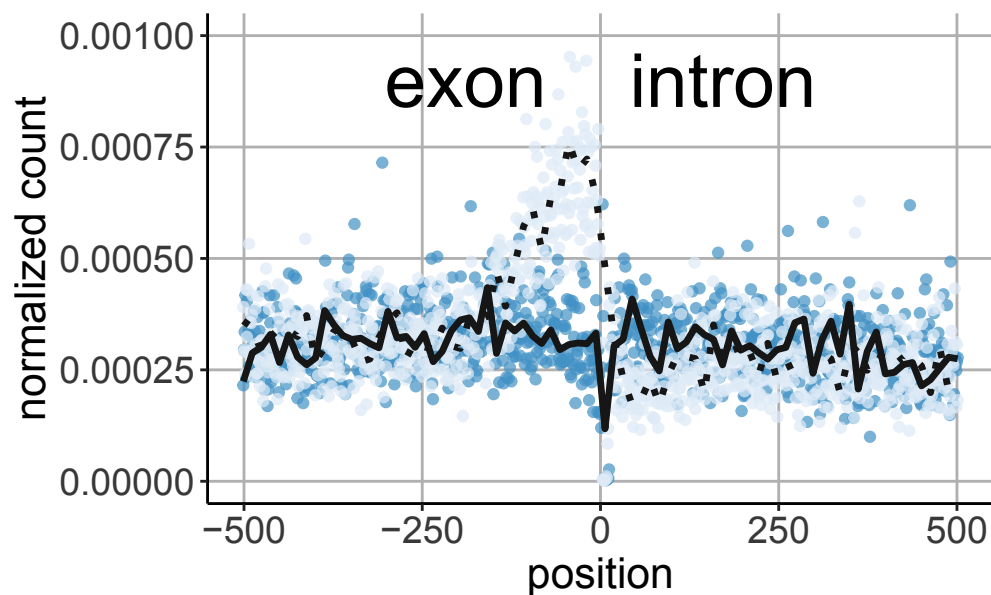

SNRNP70-GNUCANGNG

• antisense — sense    • antisense • sense

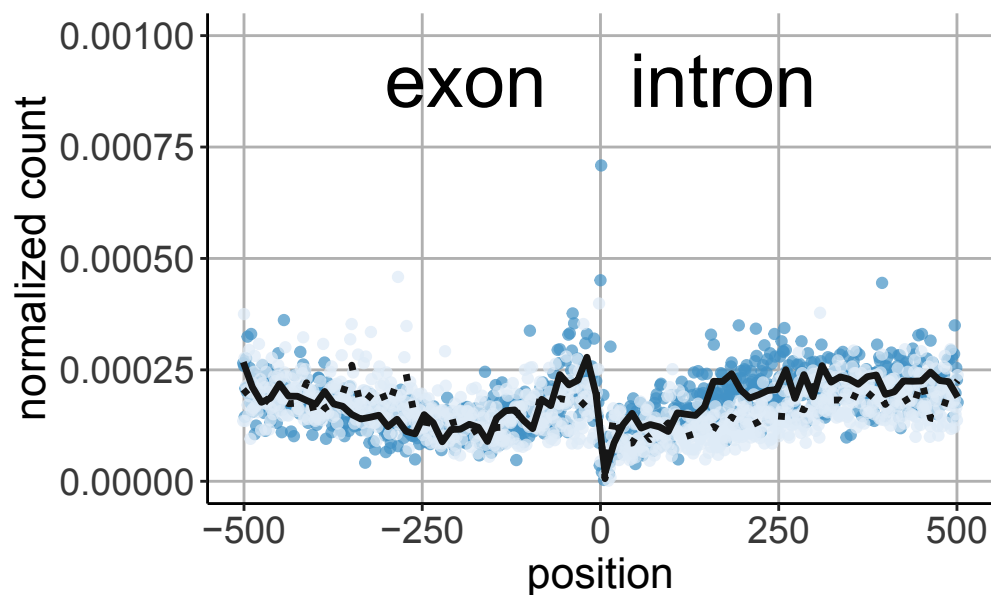

SNRNP70-GUUCAAGGUG

• antisense — sense    • antisense • sense

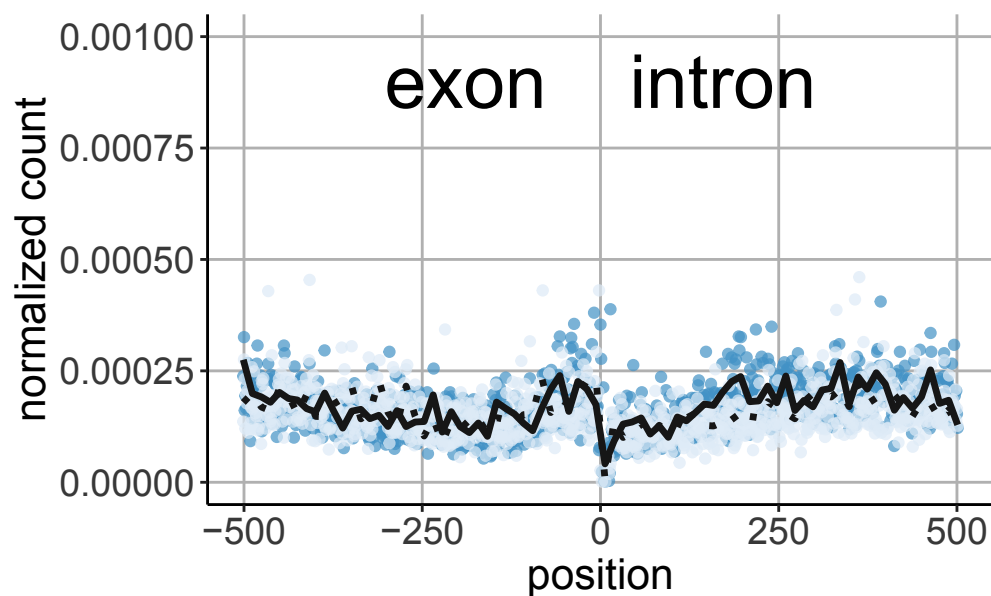

DAZ4-GYUCUAGUUAGYAUC

• antisense — sense    • antisense • sense

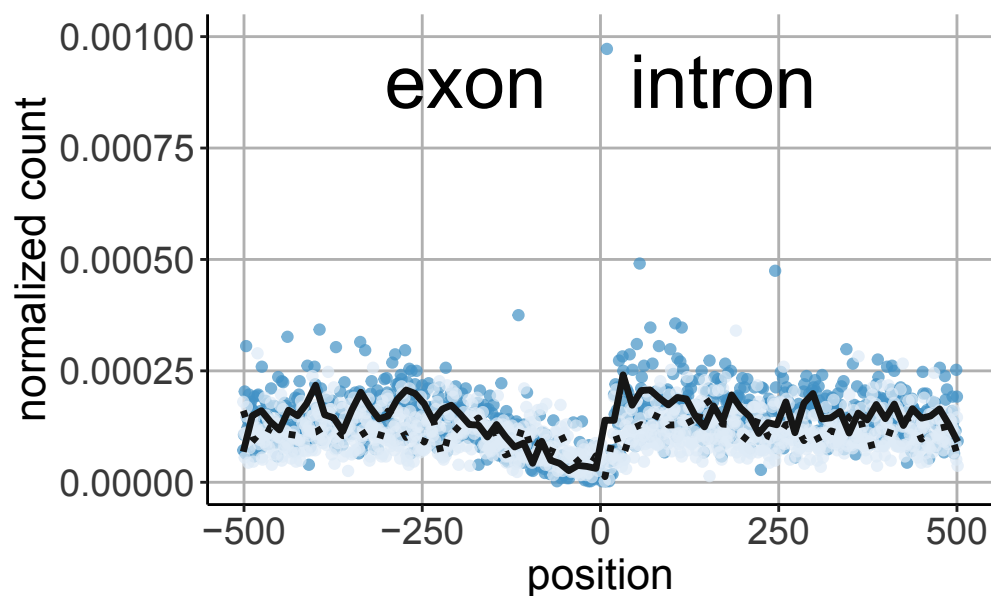

IGF2BP1-CAGNUWCA

• antisense — sense    • antisense • sense

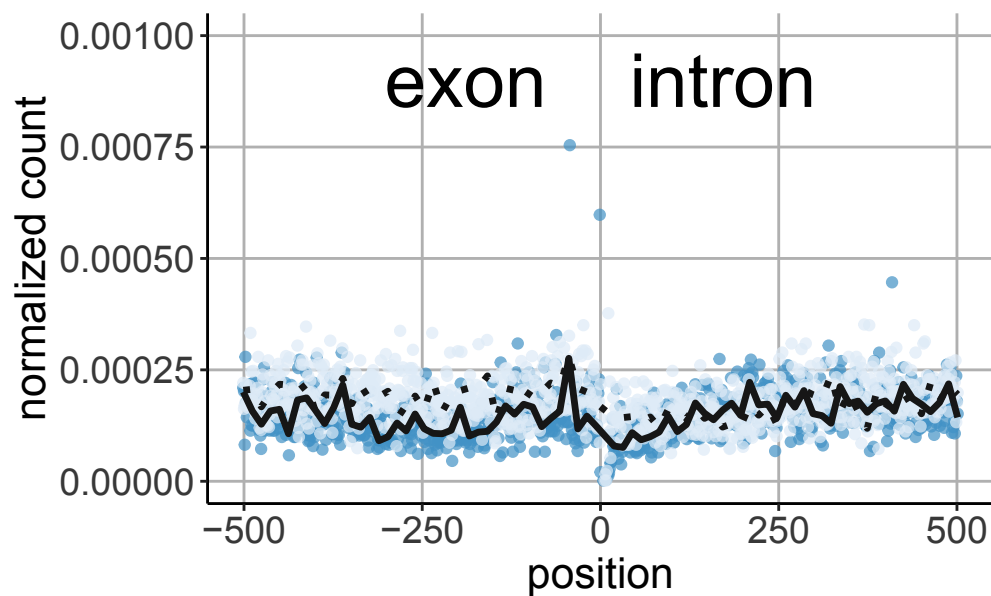

HEXIM2-NGCGACGGKN

• antisense — sense    • antisense • sense

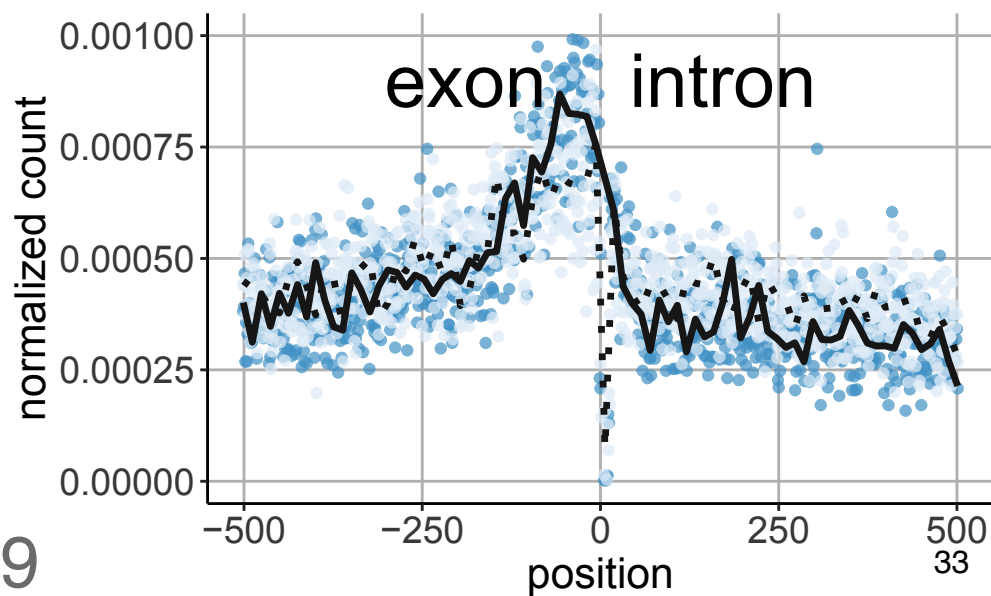

donor

YBX1-NUAACAUCGGG

• antisense — sense    • antisense • sense

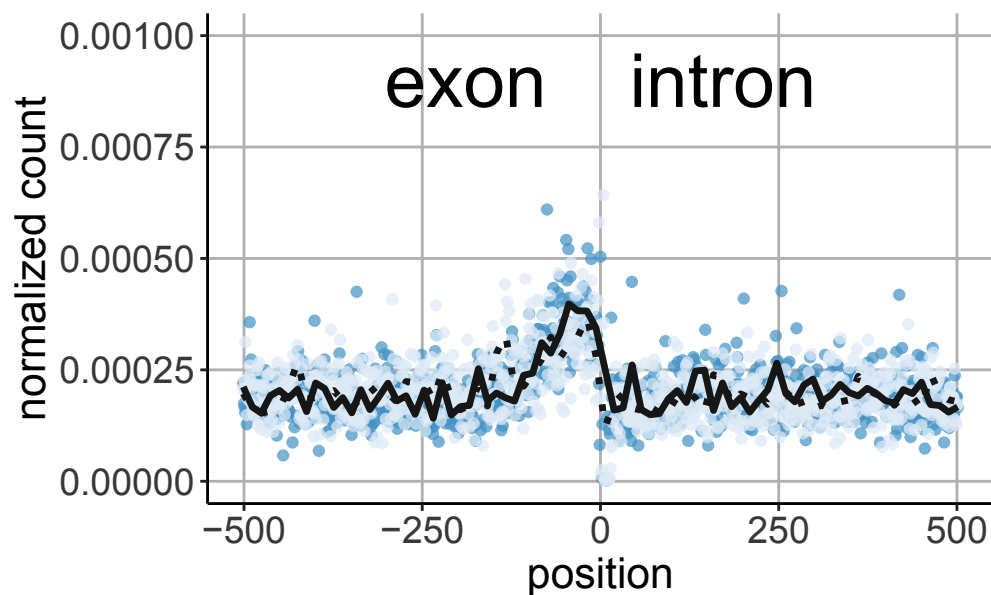

RBM24-GUGUGNGUGUG

• antisense — sense    • antisense • sense

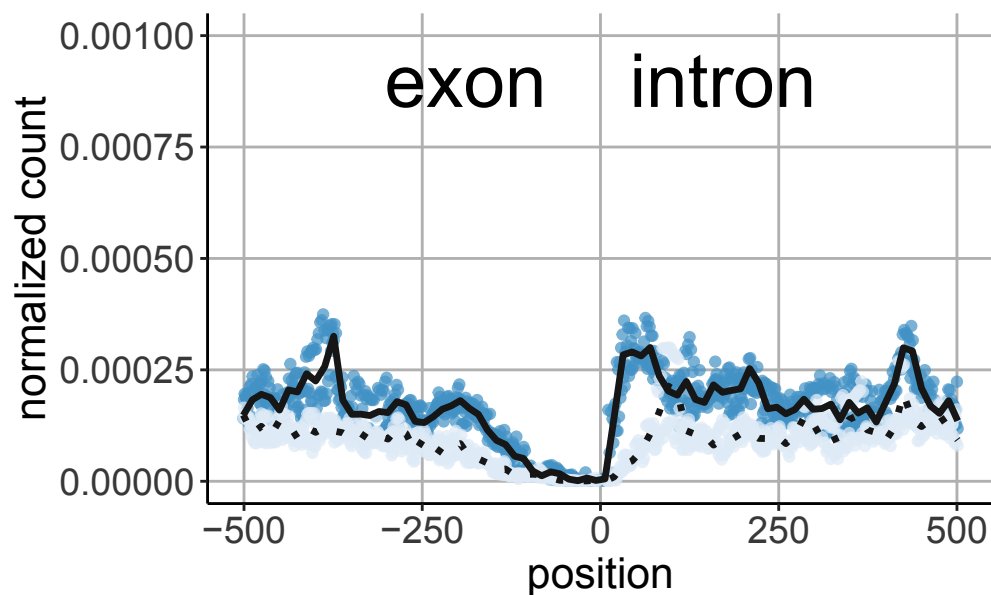

CSDA-UAACAUCA

• antisense — sense    • antisense • sense

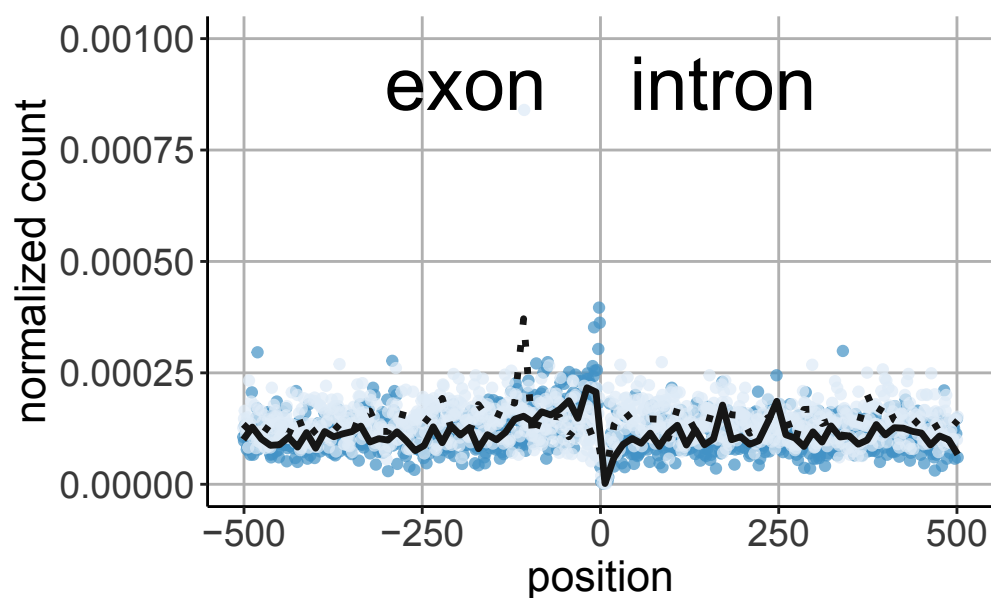

HNRNPA1L2-NUAGGUUAGGGW

• antisense — sense    • antisense • sense

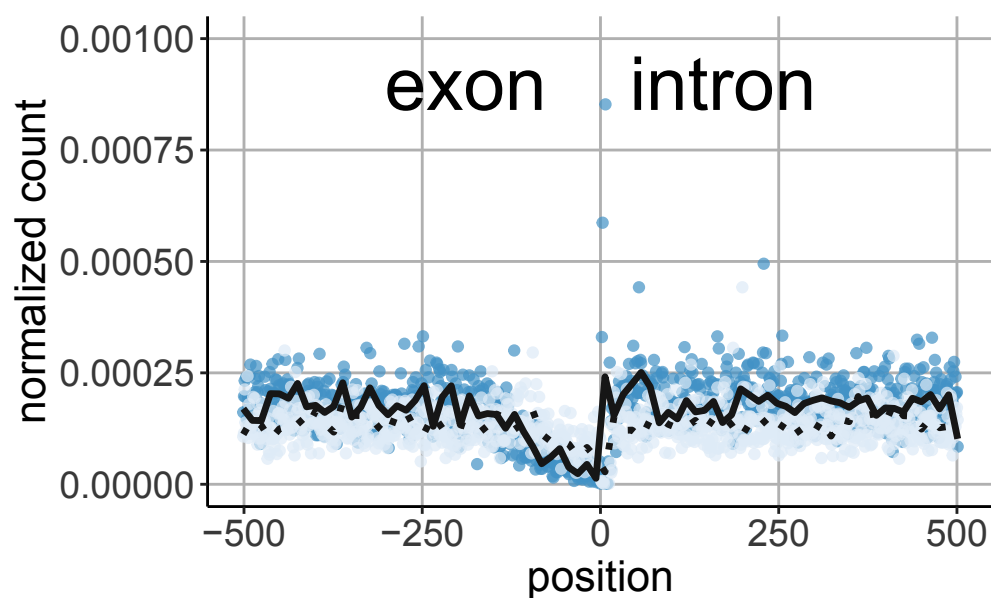

ZC3H12B-NGCGNCAGUCGGUAGCN

• antisense — sense    • antisense • sense

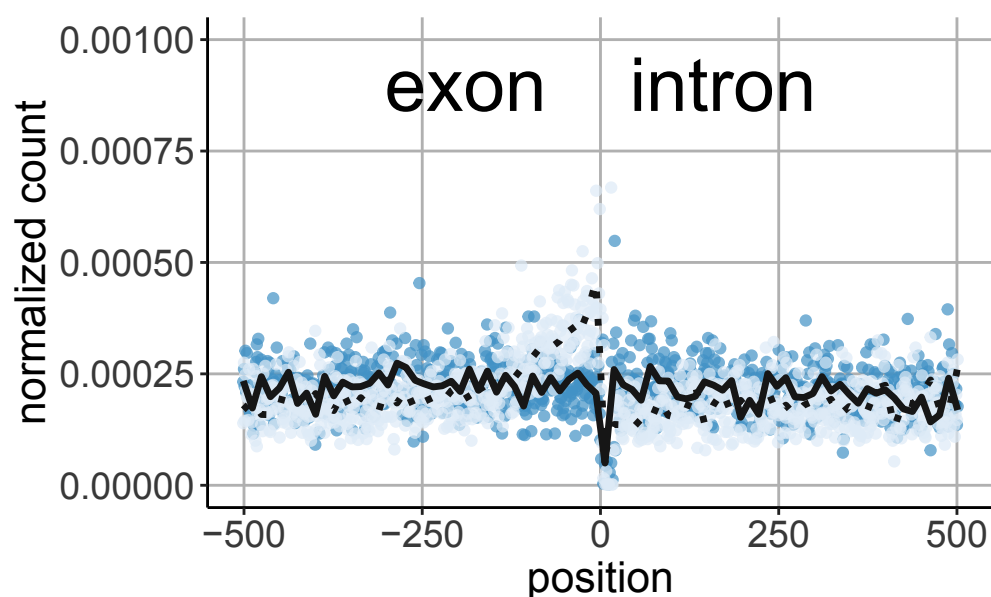

ZC3H12A-NUUGCCAWAGUKU

• antisense — sense    • antisense • sense

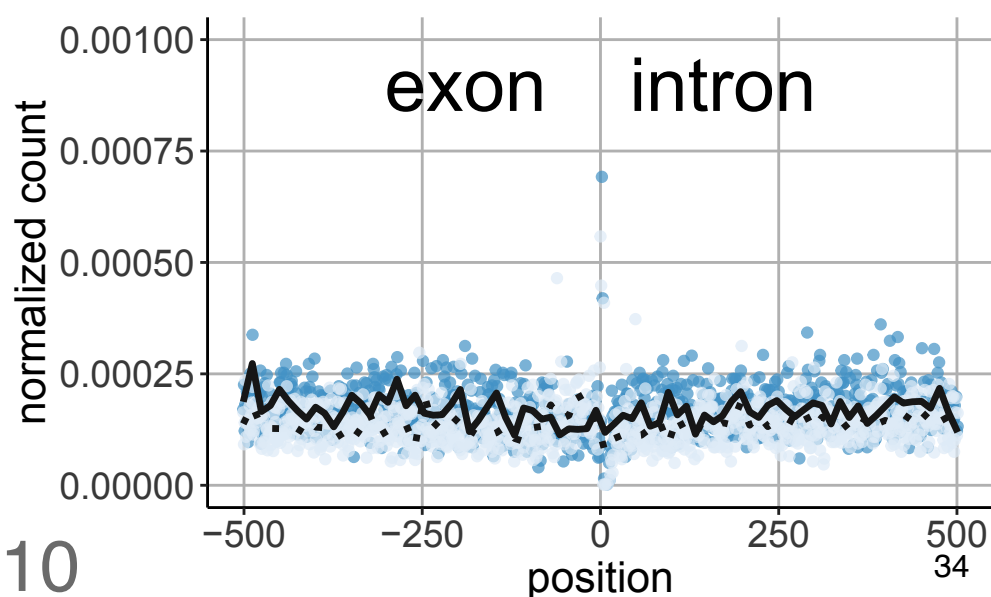

donor

DAZAP1-UUAGGUUAGG

• antisense — sense    • antisense • sense

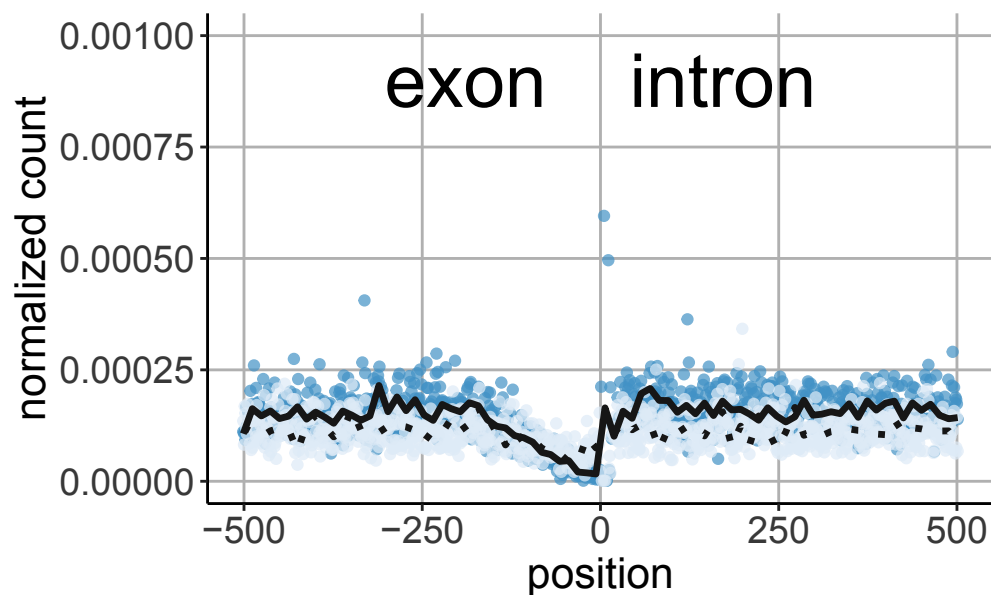

CARHSP1-GCCAUGAUGAU

• antisense — sense    • antisense • sense

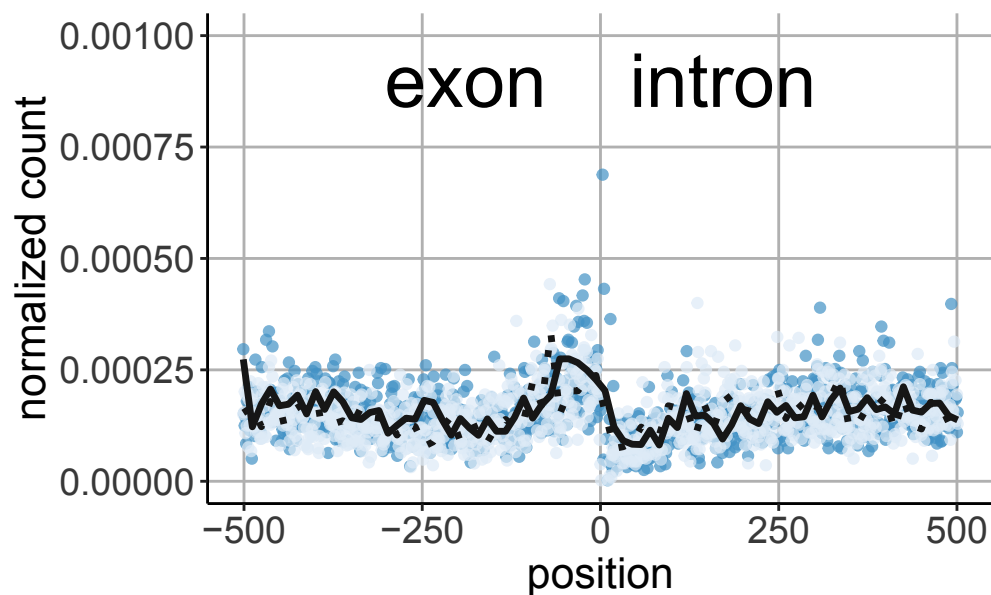

CARHSP1-UUGCCUUGUCCCGAU

• antisense — sense    • antisense • sense

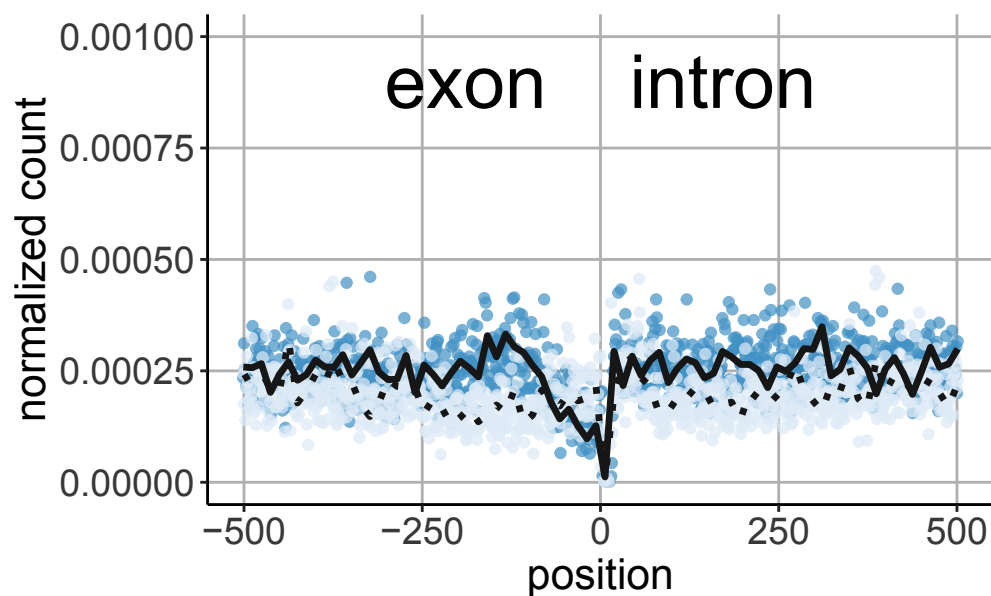

RNPC3-GGGUSUACGGGGU

• antisense — sense    • antisense • sense

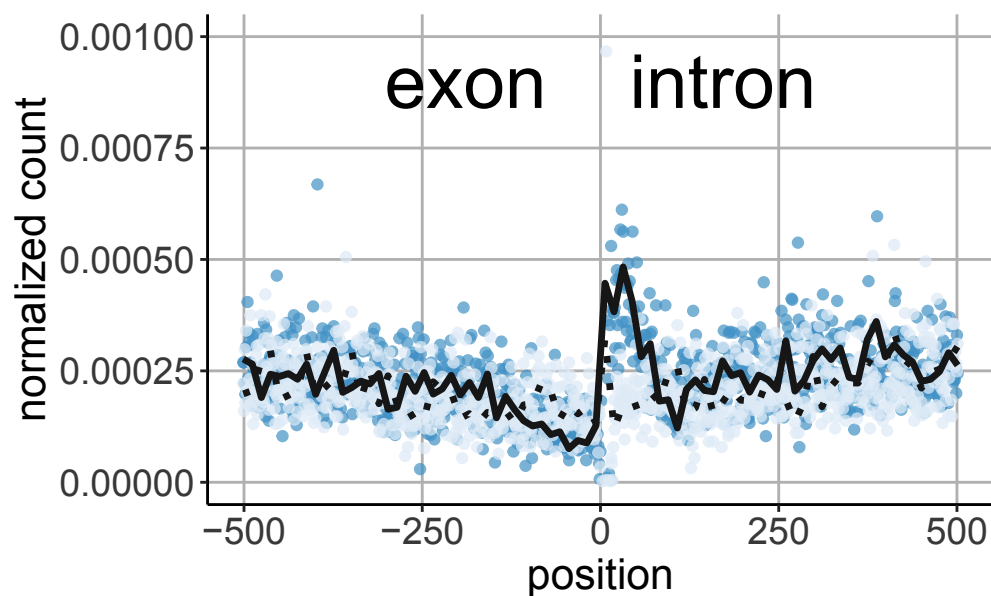

ELAVL1-UUUAUGNUUU

• antisense — sense    • antisense • sense

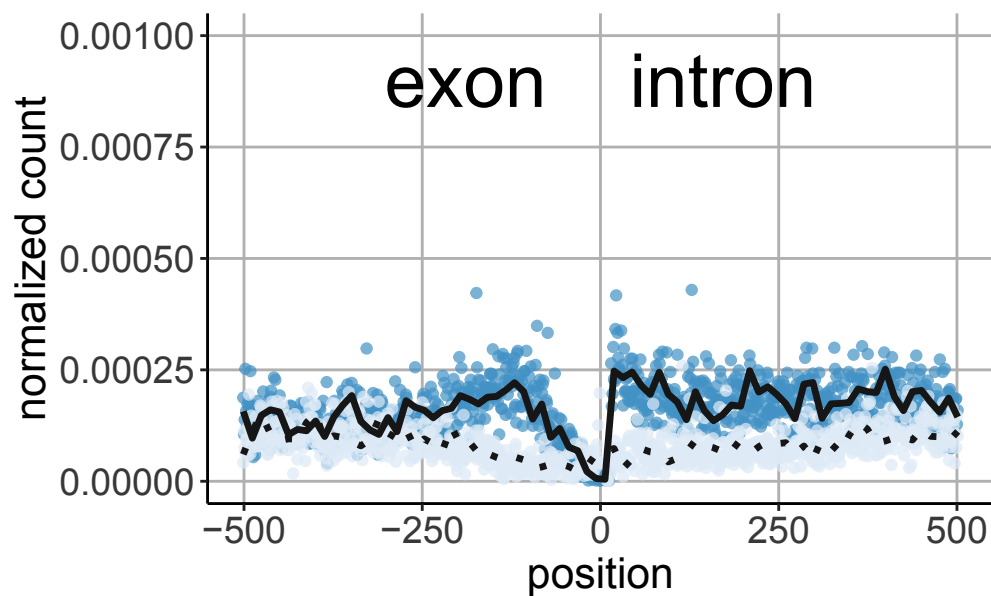

RBM46-GUGAUUG

• antisense — sense    • antisense • sense

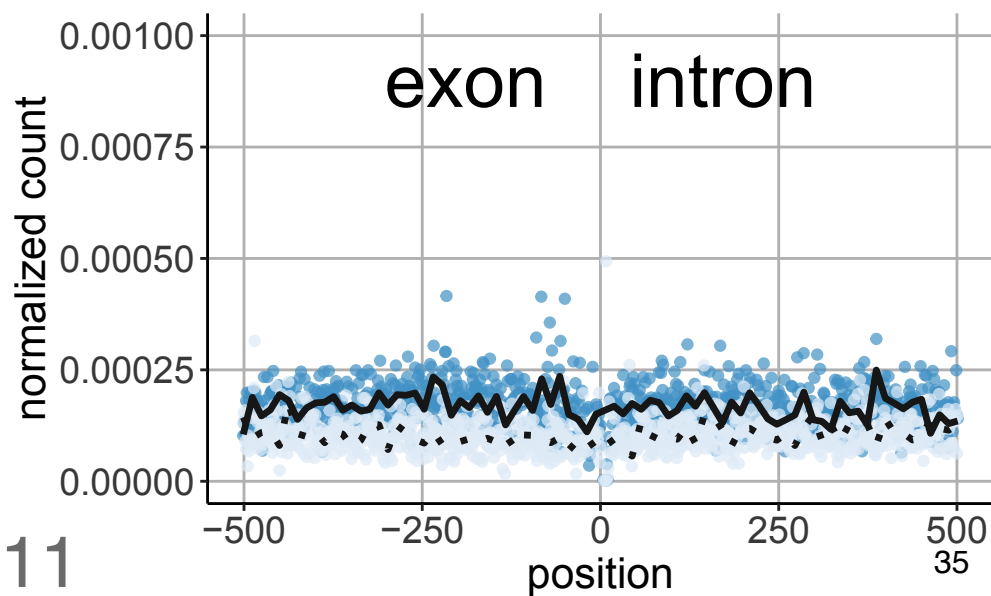

donor

ESRP1\_3-GGUGUGGUGU

•• antisense — sense    • antisense • sense

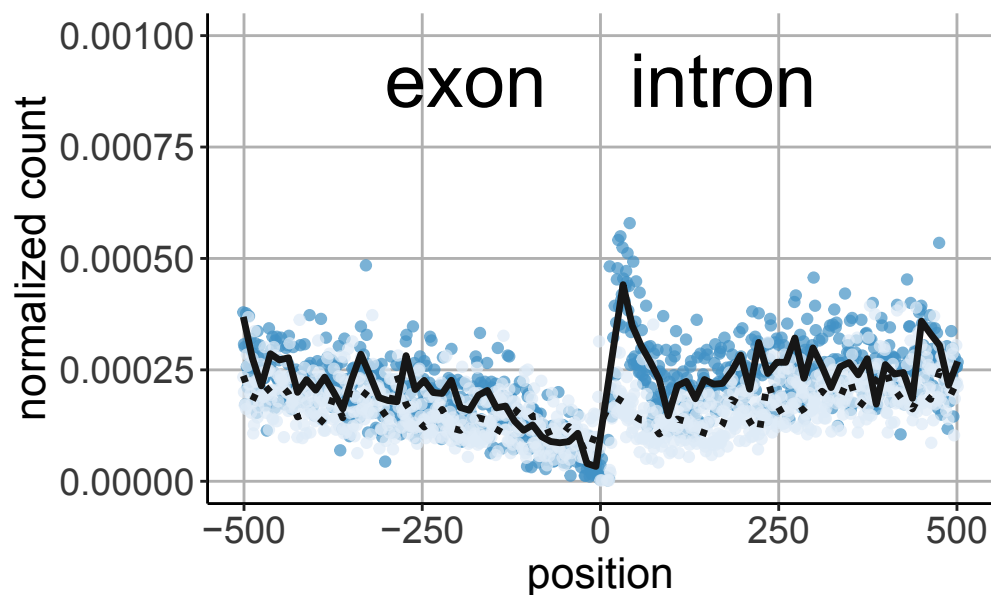

SNRPB2-GGGUGUGCAC

•• antisense — sense    • antisense • sense

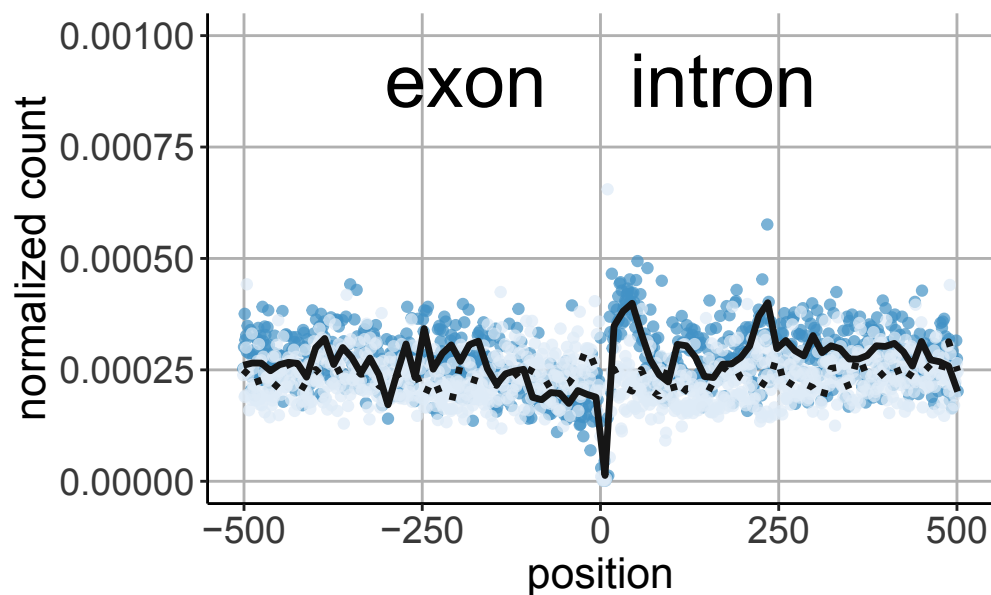

SNRPB2-NNCAUUGCACN

•• antisense — sense    • antisense • sense

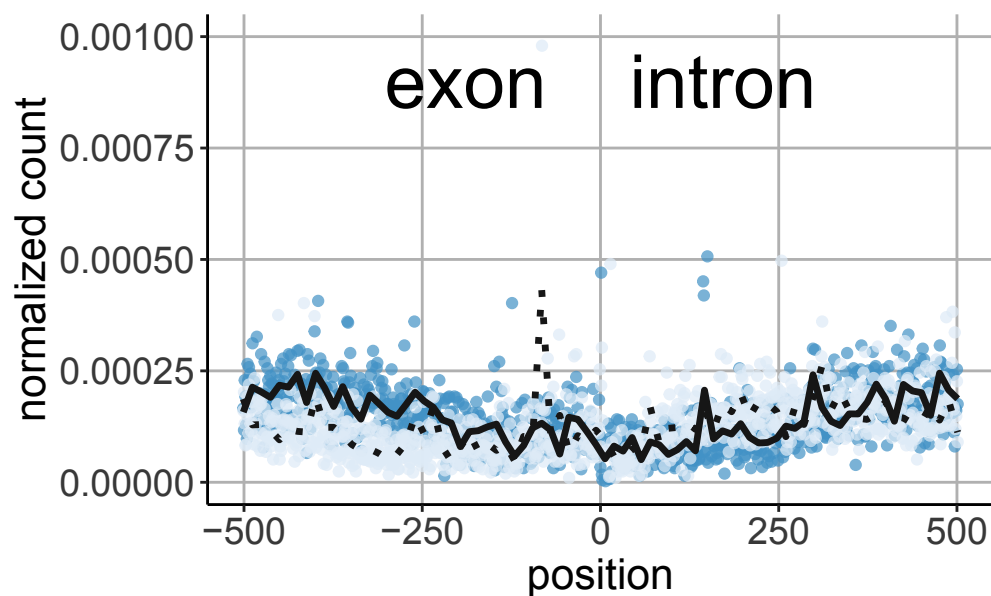

MEX3C-NNAGAGUUUAUNN

•• antisense — sense    • antisense • sense

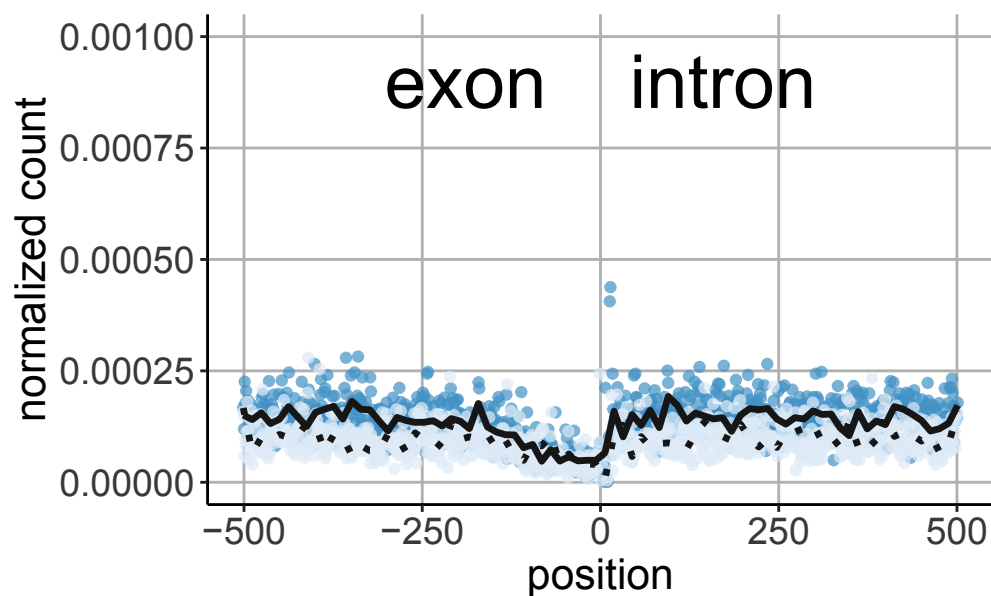

HNRNPA0-KUAGKUUAGGK

•• antisense — sense    • antisense • sense

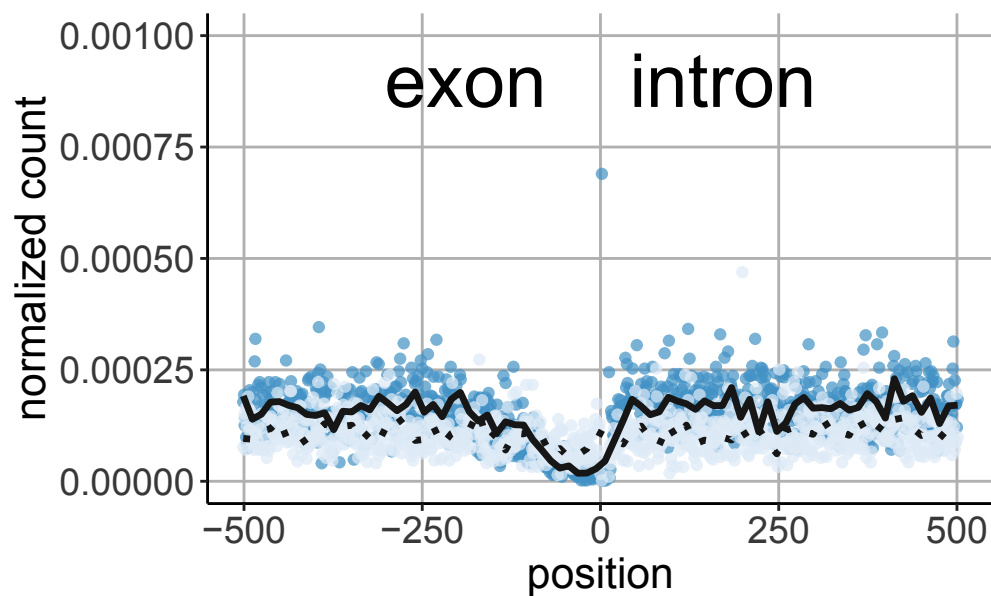

HNRNPA0-KUAGKUUUAGGK

•• antisense — sense    • antisense • sense

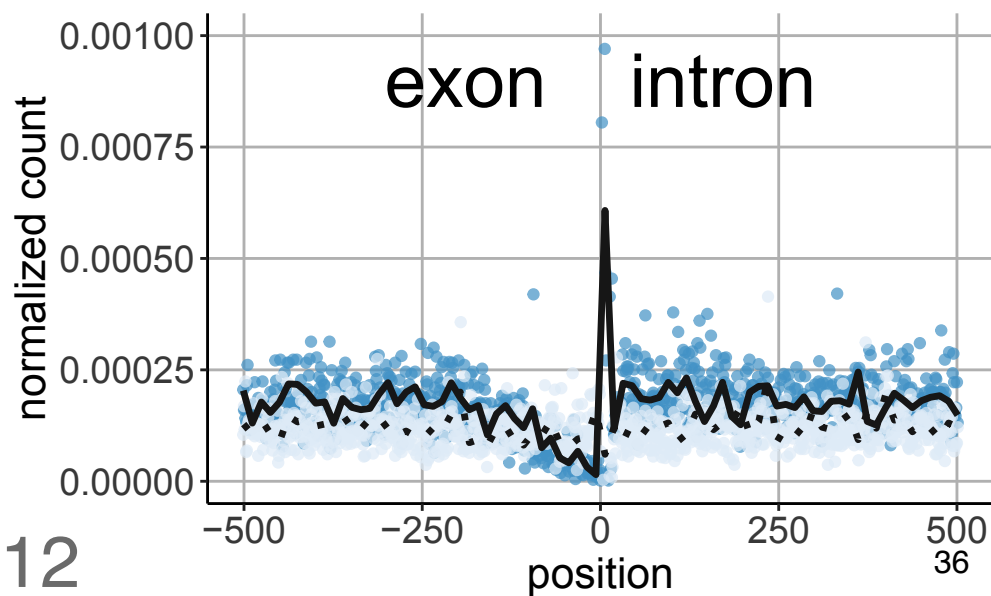

donor

SNRPA-CAUUGCACN

• antisense — sense • antisense • sense

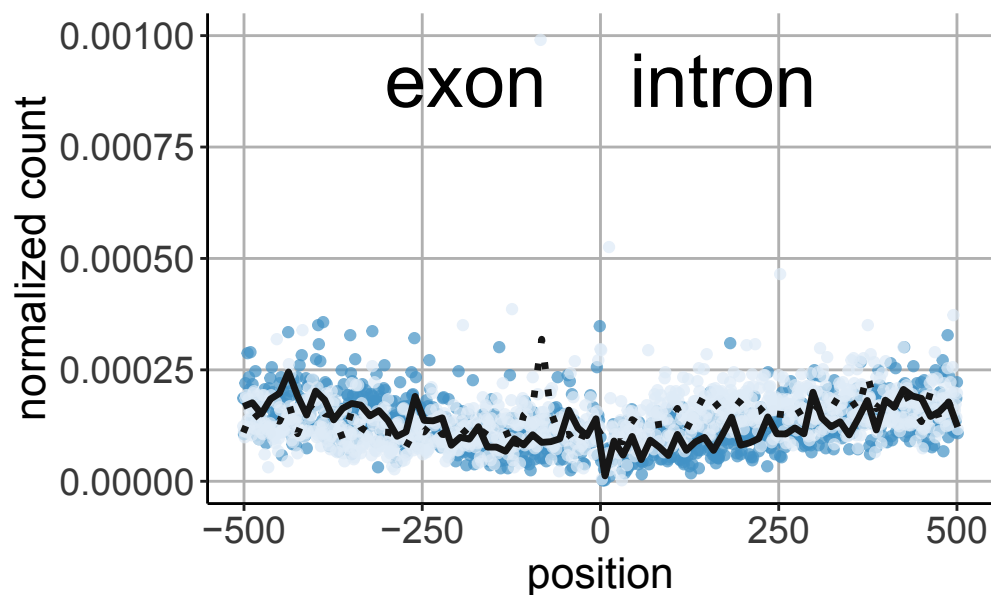

SNRPA-NUGCACR

• antisense — sense • antisense • sense

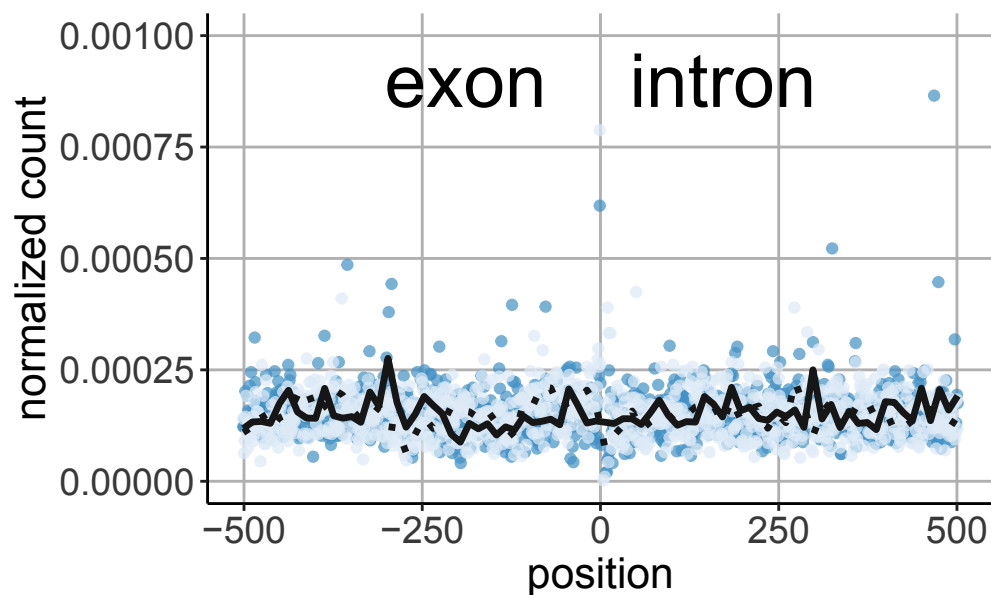

MEX3B\_3-UAGAGUUUUAU

• antisense — sense • antisense • sense

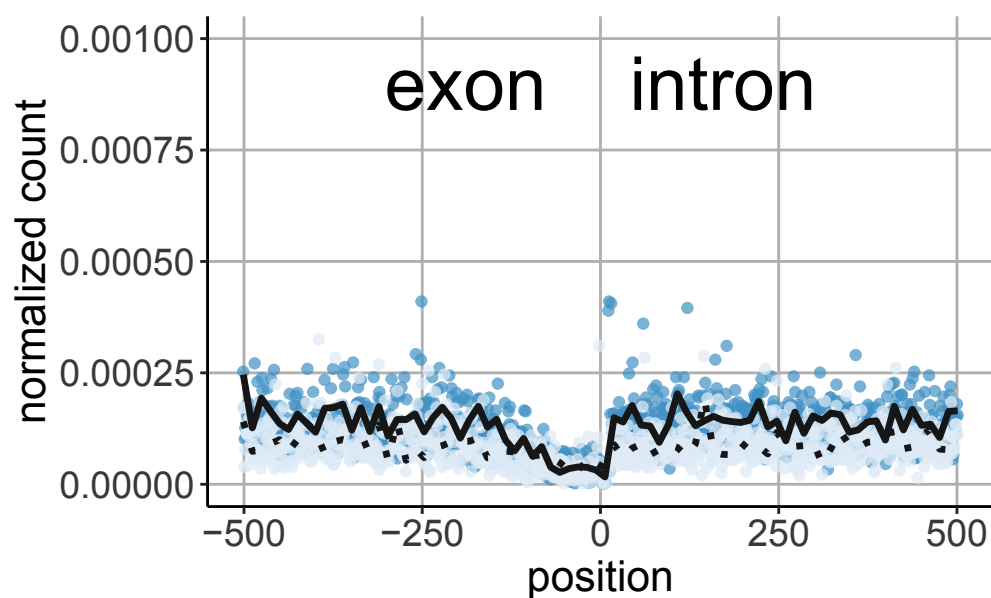

MEX3B\_3-UAUUUUAU

• antisense — sense • antisense • sense

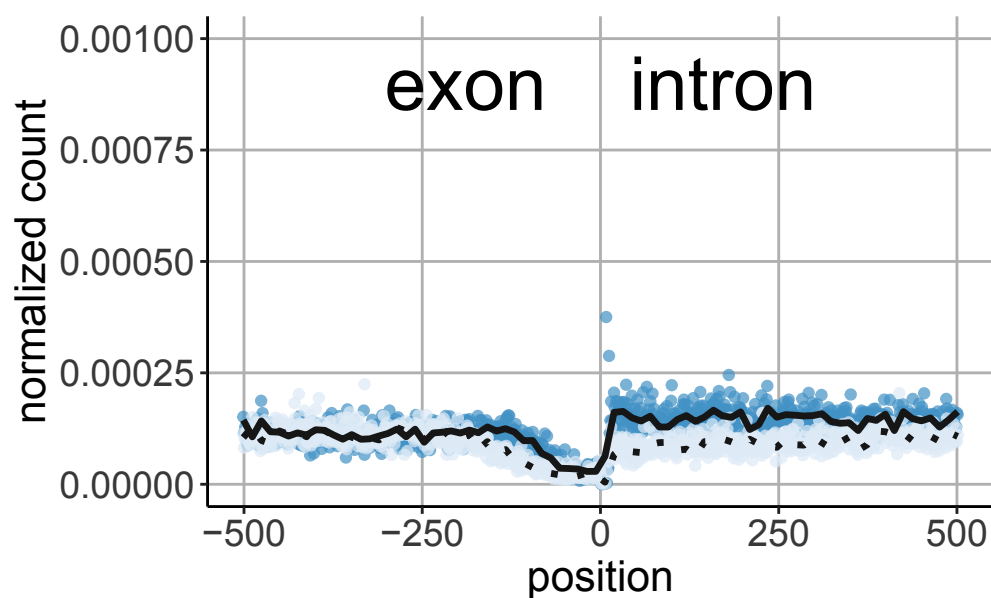

KHDRBS2-UAAACAAUAA

• antisense — sense • antisense • sense

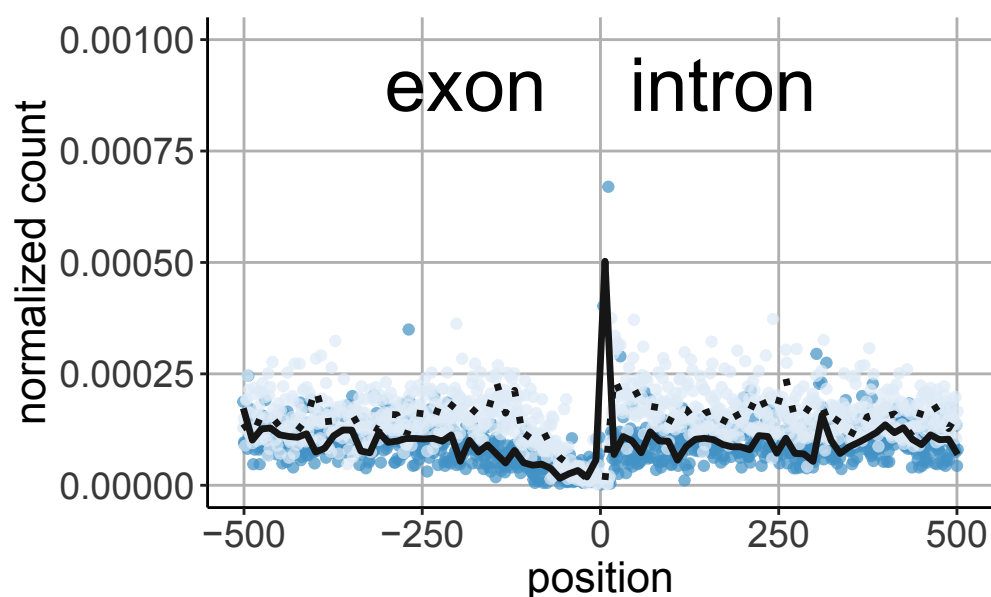

CELF3\_2-UGUGUNUGUGU

• antisense — sense • antisense • sense

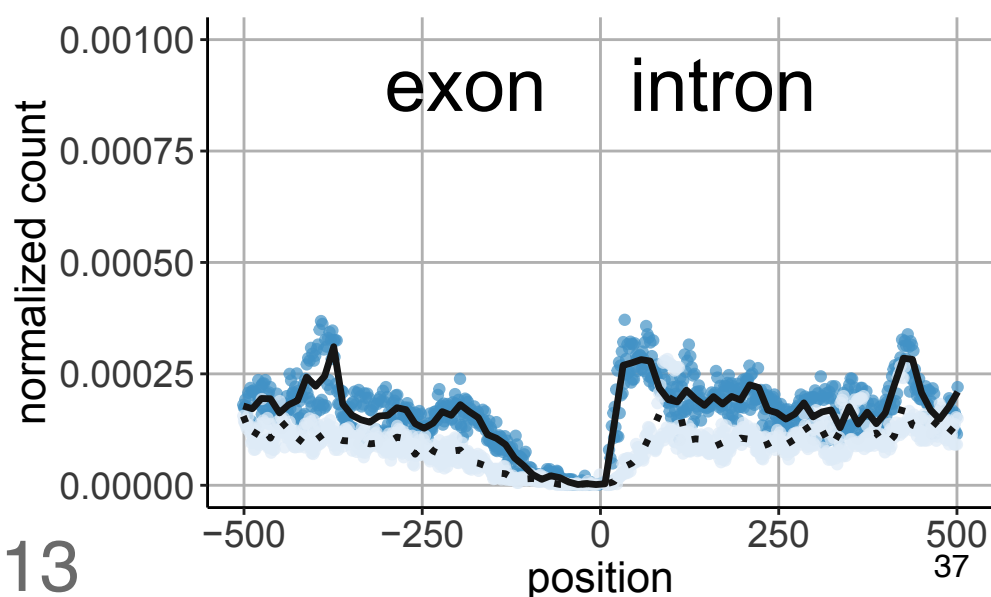

donor

RNPC3-GGGDDGGGDKUACKKGGK

•• antisense — sense    • antisense • sense

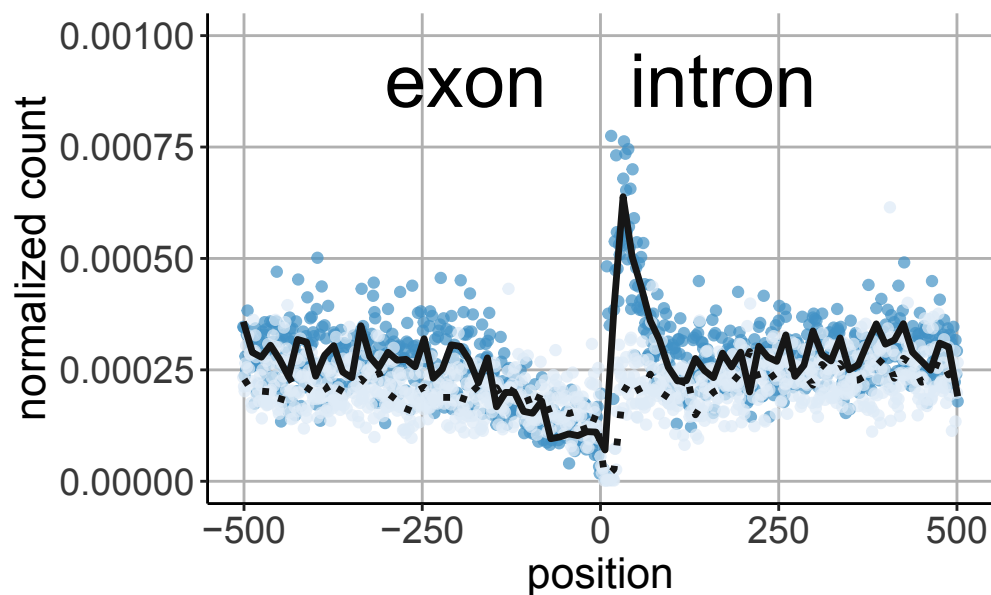

RBM14-UGCGUCG

•• antisense — sense    • antisense • sense

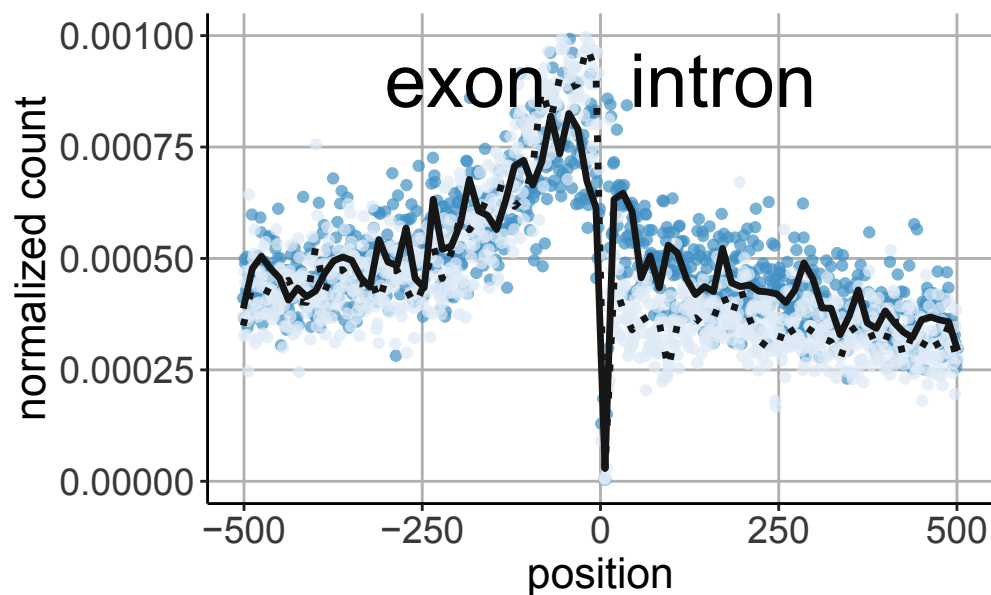

CELF4-UGUGUUGUGU

•• antisense — sense    • antisense • sense

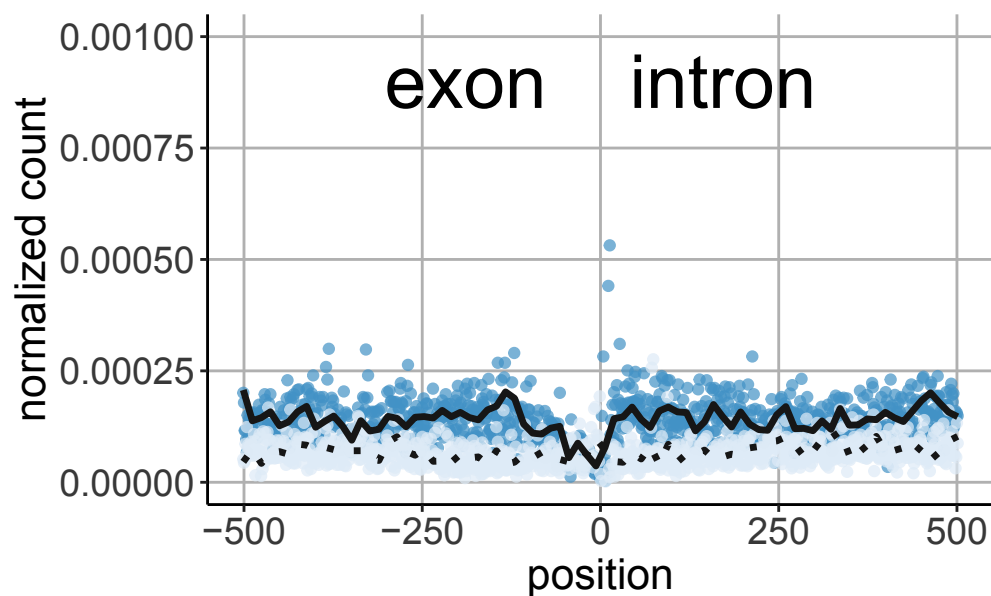

ZRANB2-NNNGGUAAGGUNN

•• antisense — sense    • antisense • sense

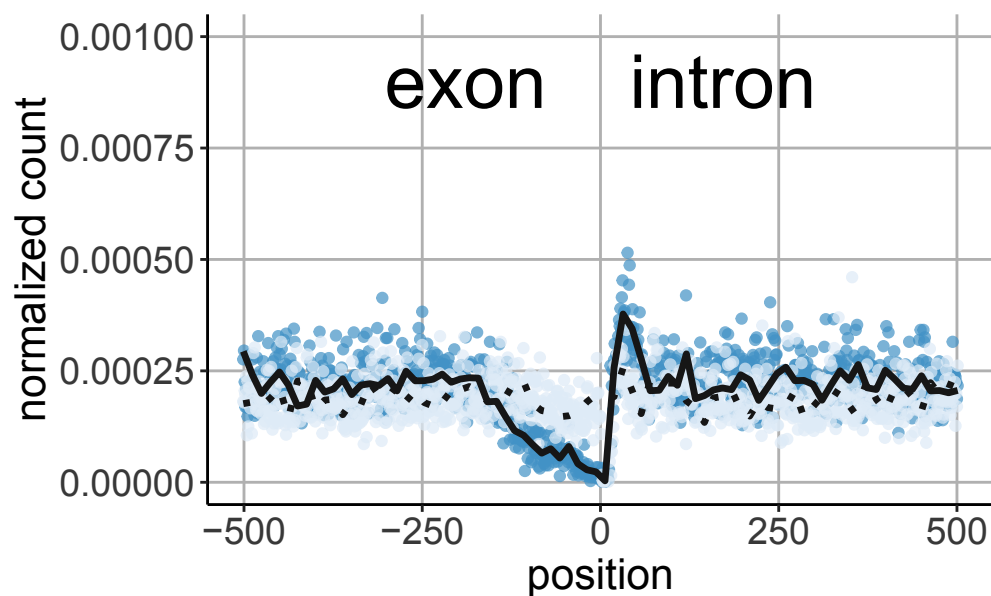

RBM4-CGGGGURUGN

•• antisense — sense    • antisense • sense

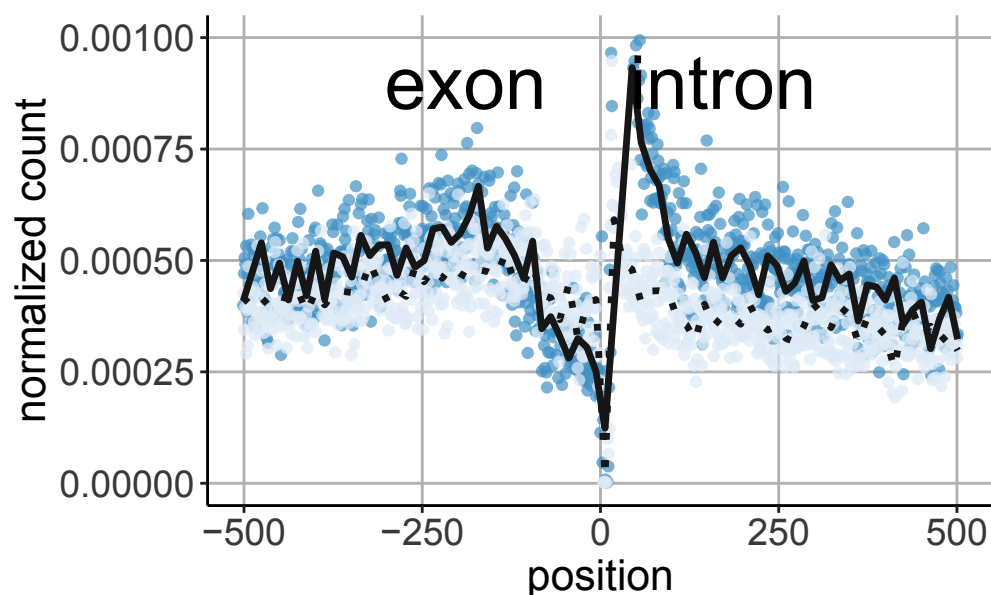

RBPM5-NAGGCACR

•• antisense — sense    • antisense • sense

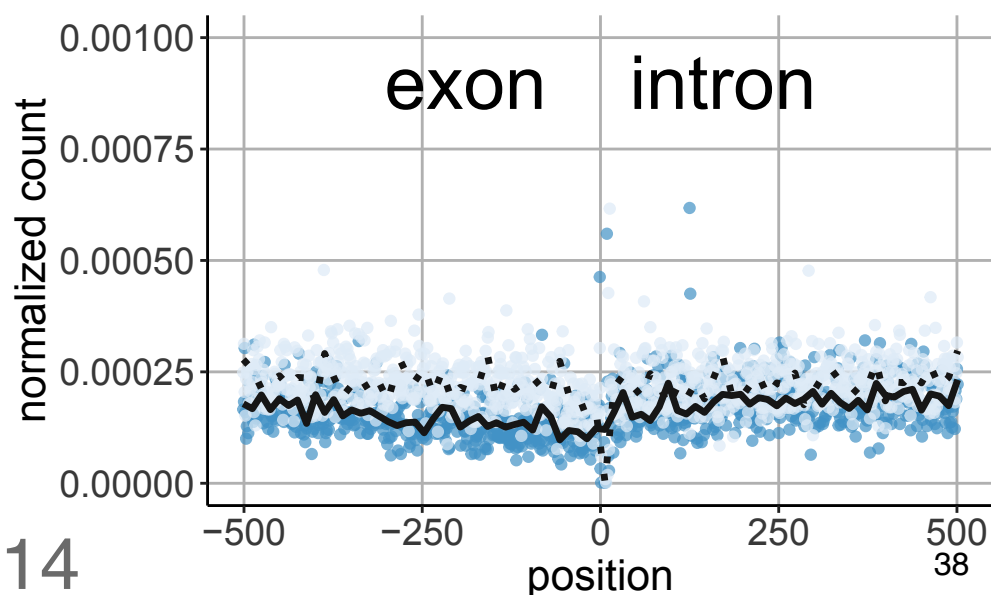

donor

RBPMS-UCACGNGCACN

•• antisense — sense    • antisense • sense

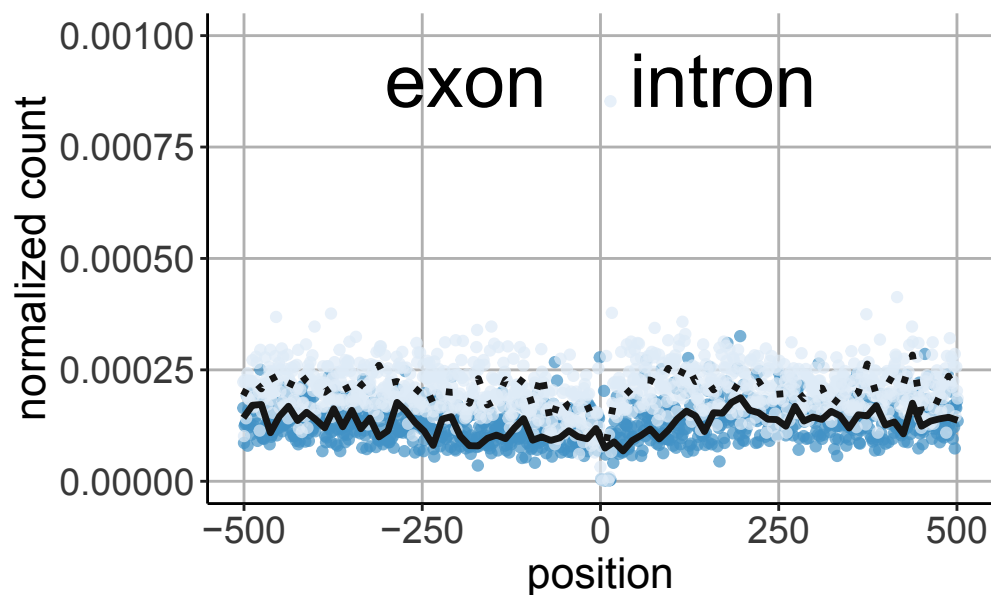

CELF1\_2-UGUGUNUGUGU

•• antisense — sense    • antisense • sense

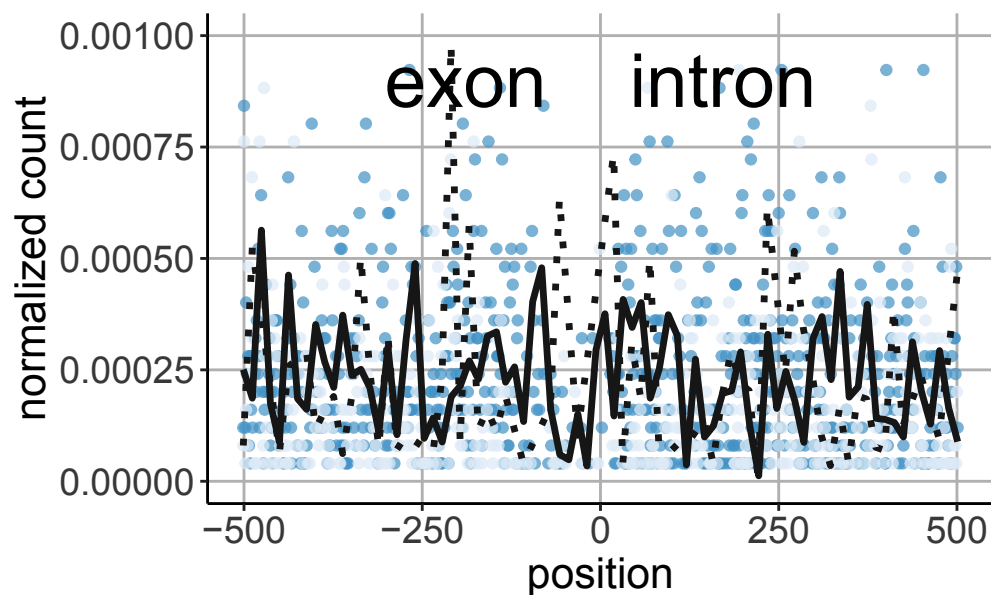

CSTF2-RRGGCGUAGCGUNN

•• antisense — sense    • antisense • sense

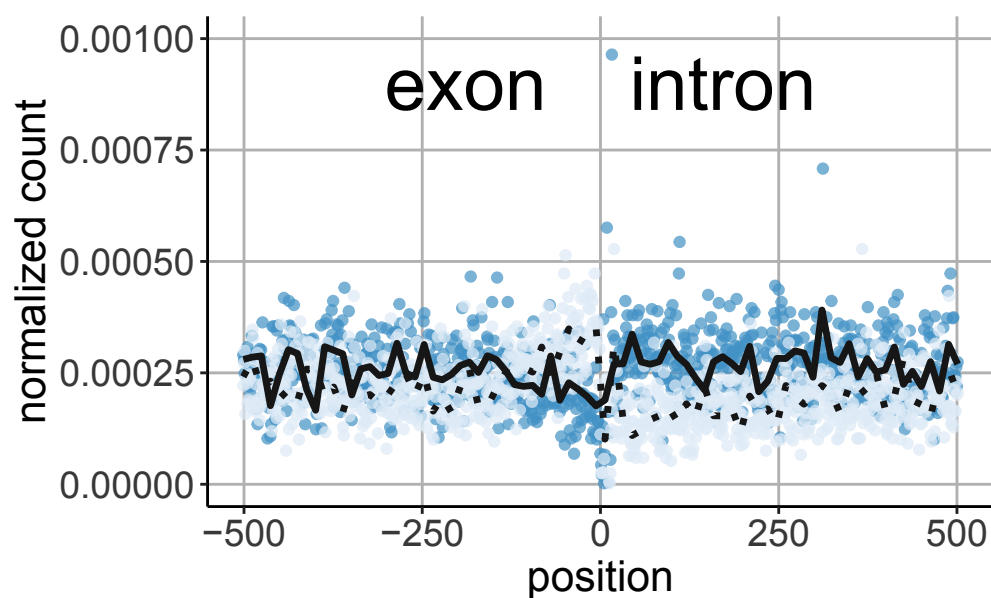

RBM28-GRGGCCGNGCGGUGG

•• antisense — sense    • antisense • sense

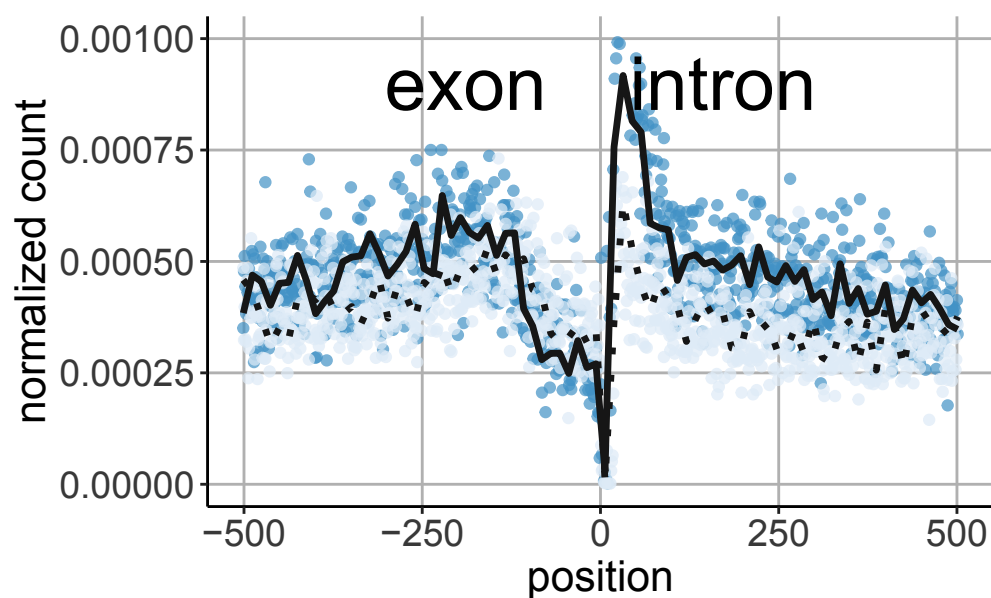

RBM28-GUGGGUCUCGG

•• antisense — sense    • antisense • sense

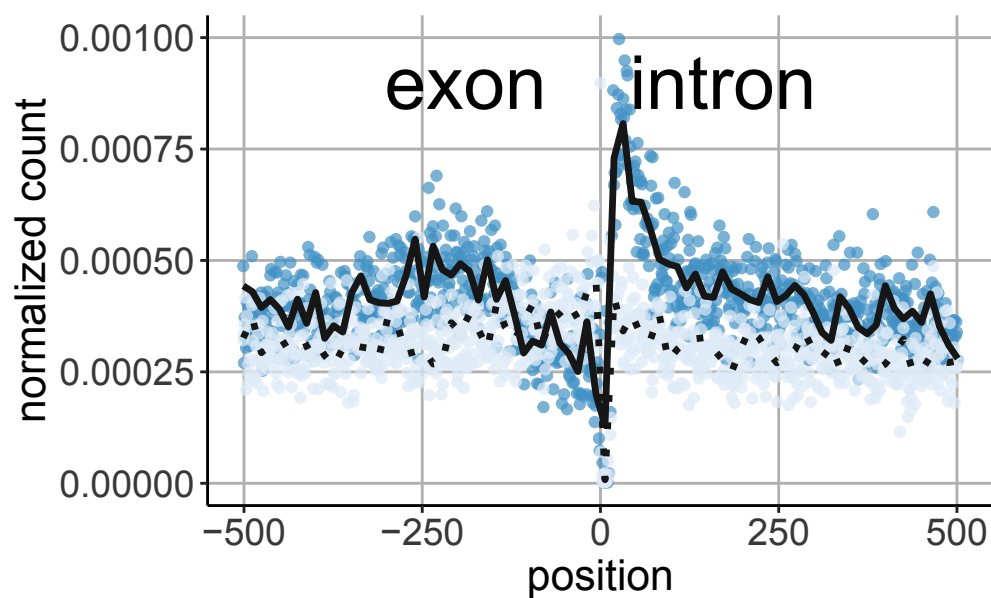

ZC3H10-GCGCAUGCGNN

•• antisense — sense    • antisense • sense

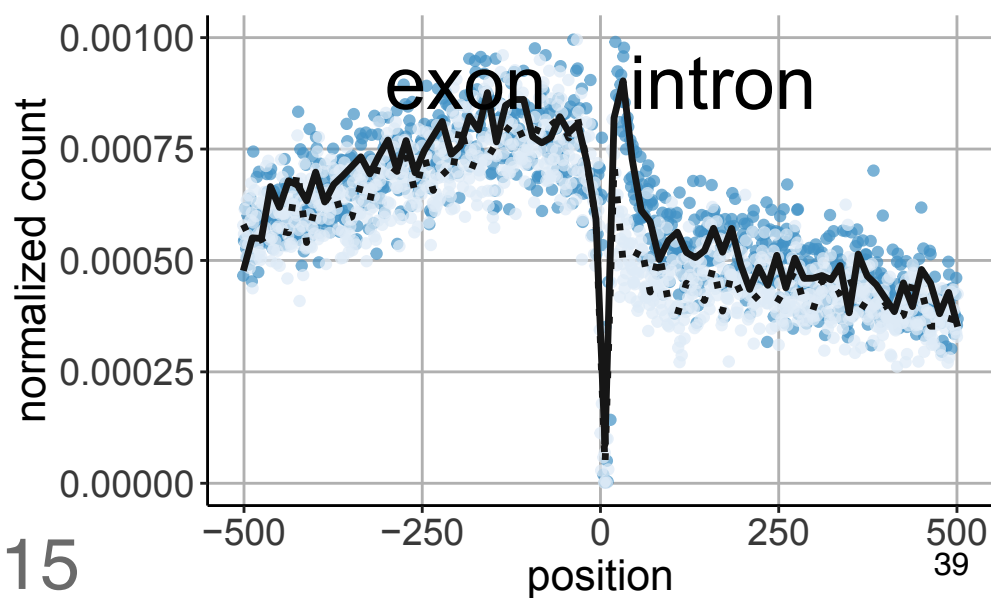



donor

ZC3H10-NGCGCAGCGUN

• antisense — sense • antisense • sense

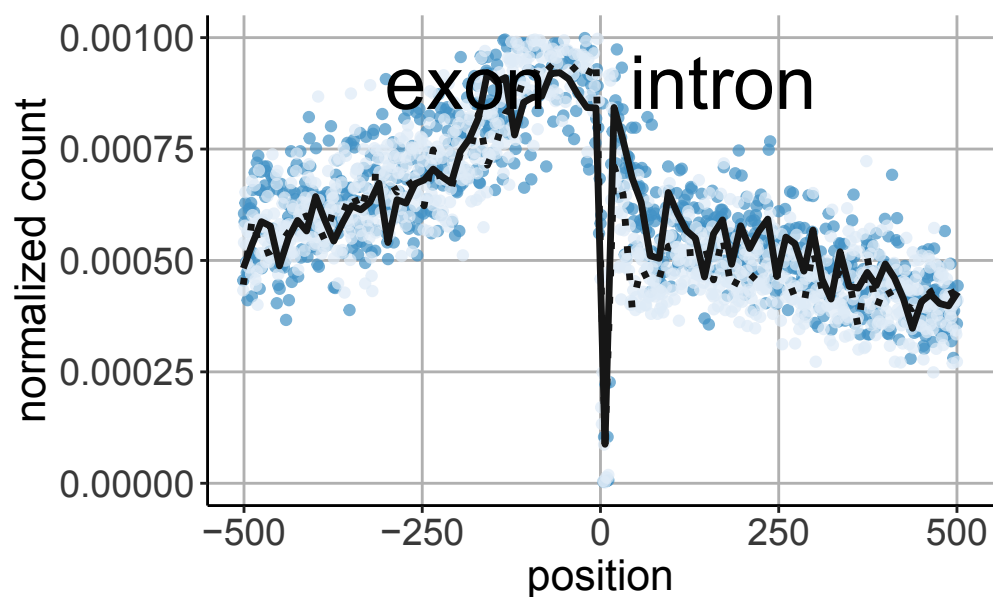

RBFOX1\_2-GCAUGNNGCAUG

• antisense — sense • antisense • sense

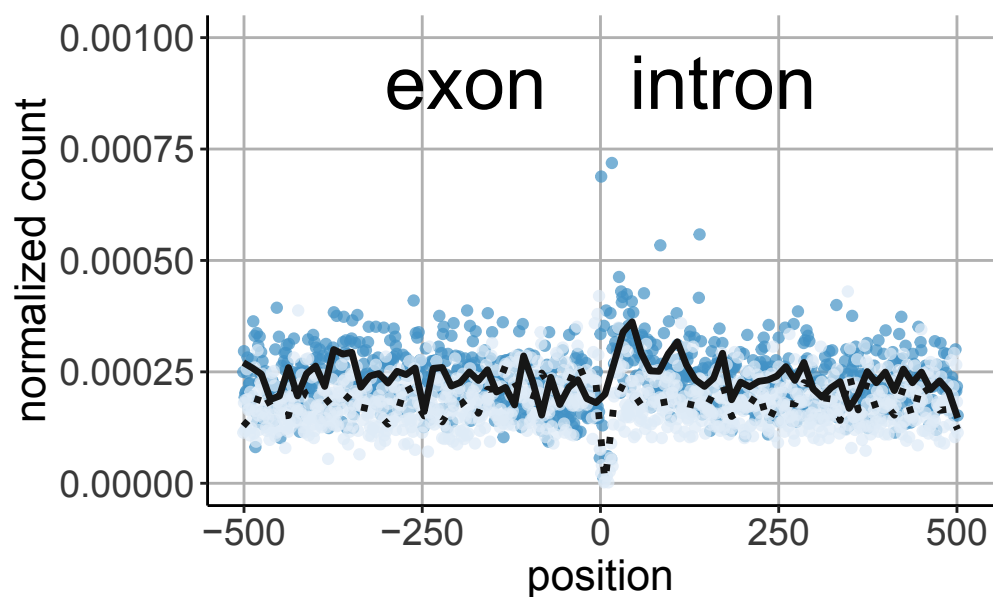

MSI1-KUAGUWKUAGK

• antisense — sense • antisense • sense

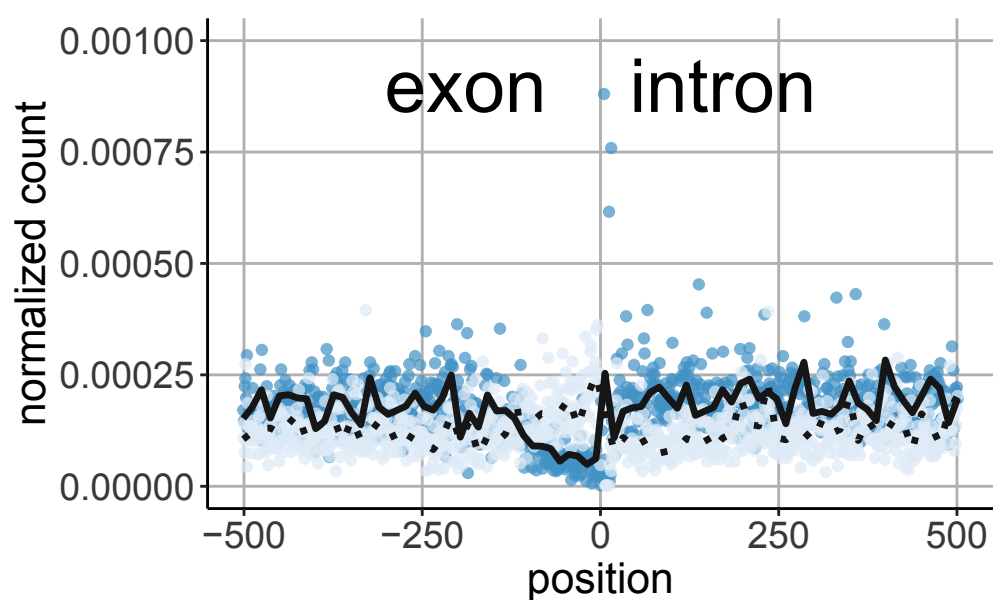

HEXIM1-GKDKCGACGGK

• antisense — sense • antisense • sense

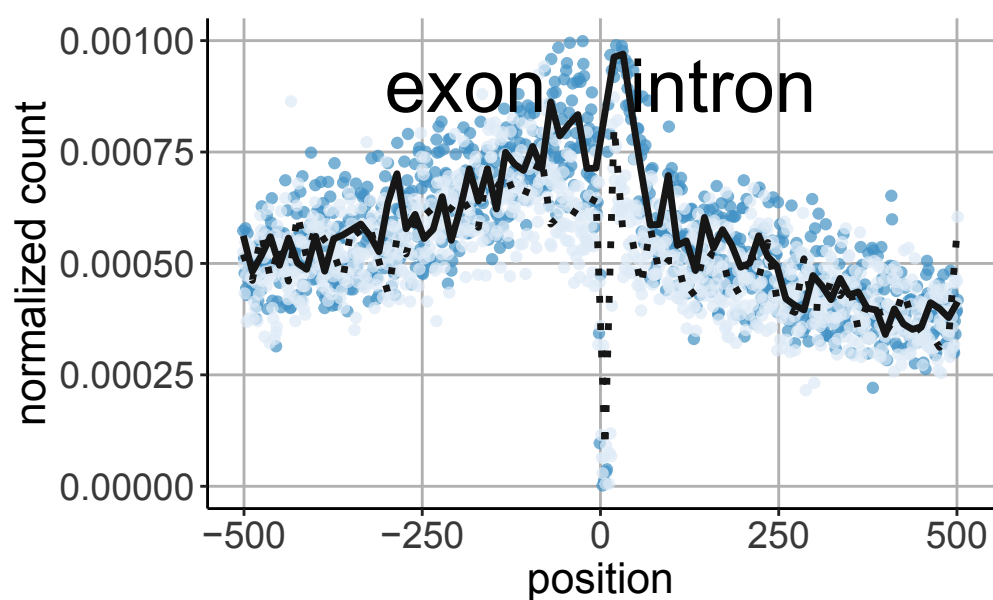

SART3-NGUUAGCRK

• antisense — sense • antisense • sense

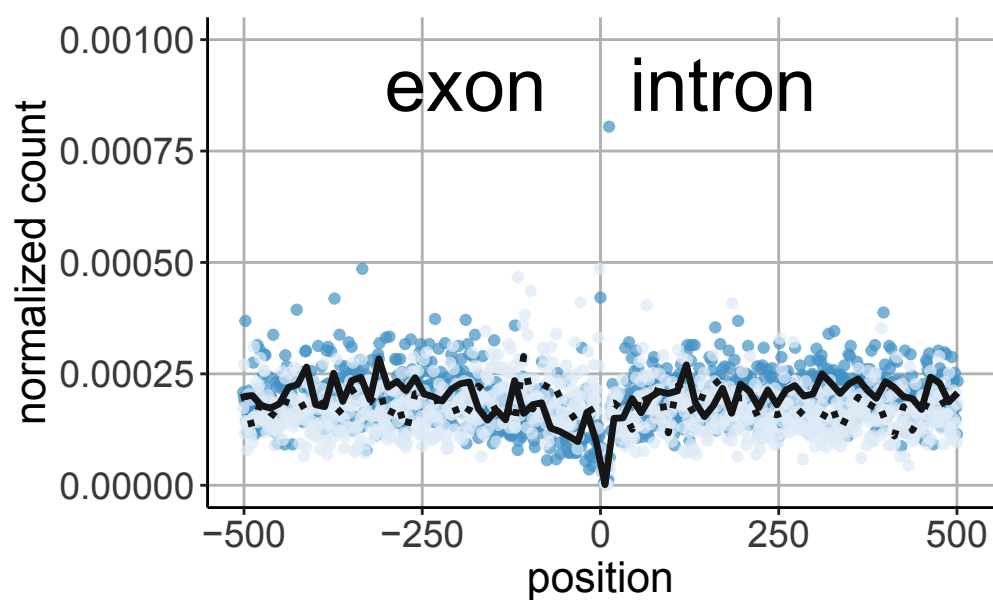

MSI2-GUAGUGDGUAGK

• antisense — sense • antisense • sense

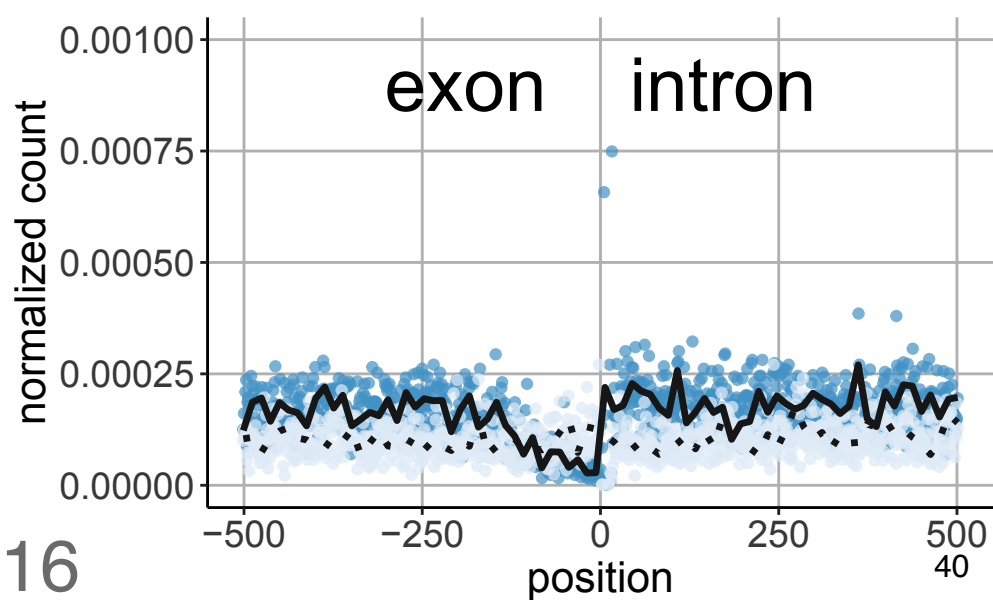

donor

MSI2-GUAGUNNNGUAGK

ZCRB1-GNNUUAAKK

• antisense — sense • antisense • sense

• antisense — sense • antisense • sense

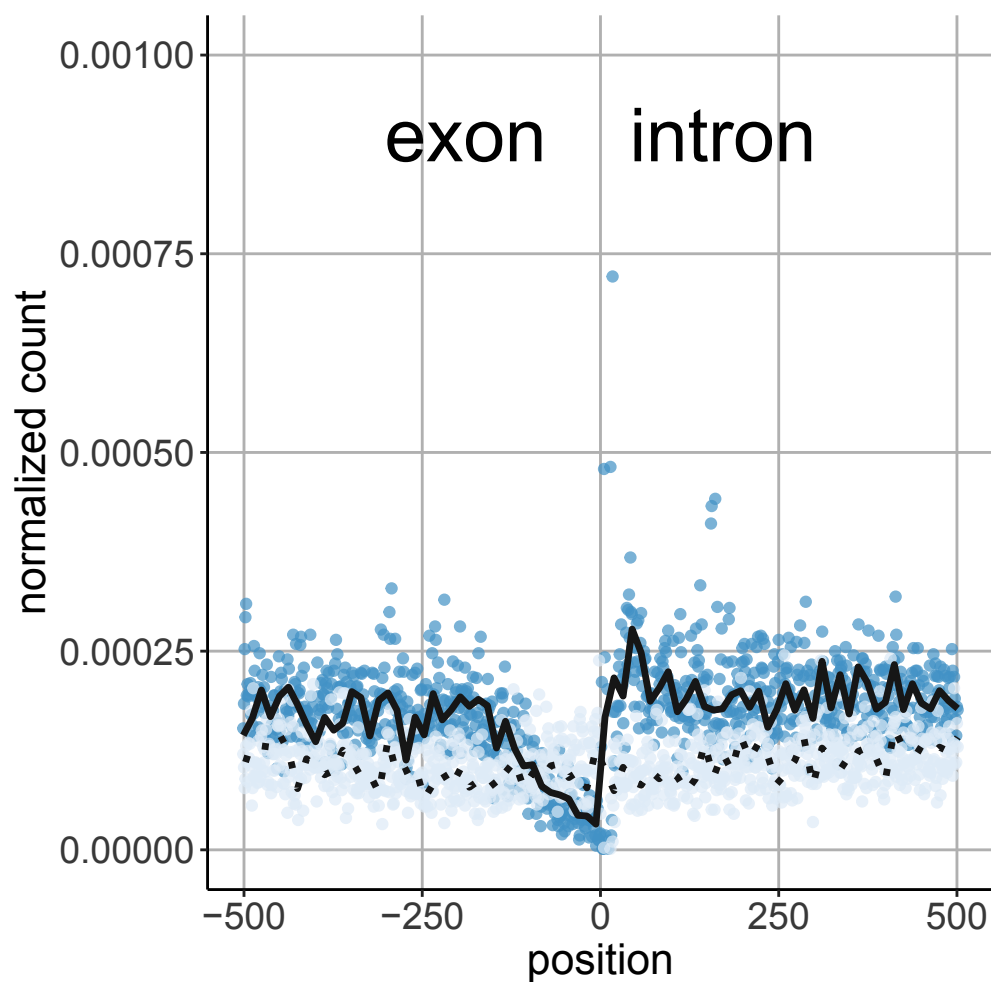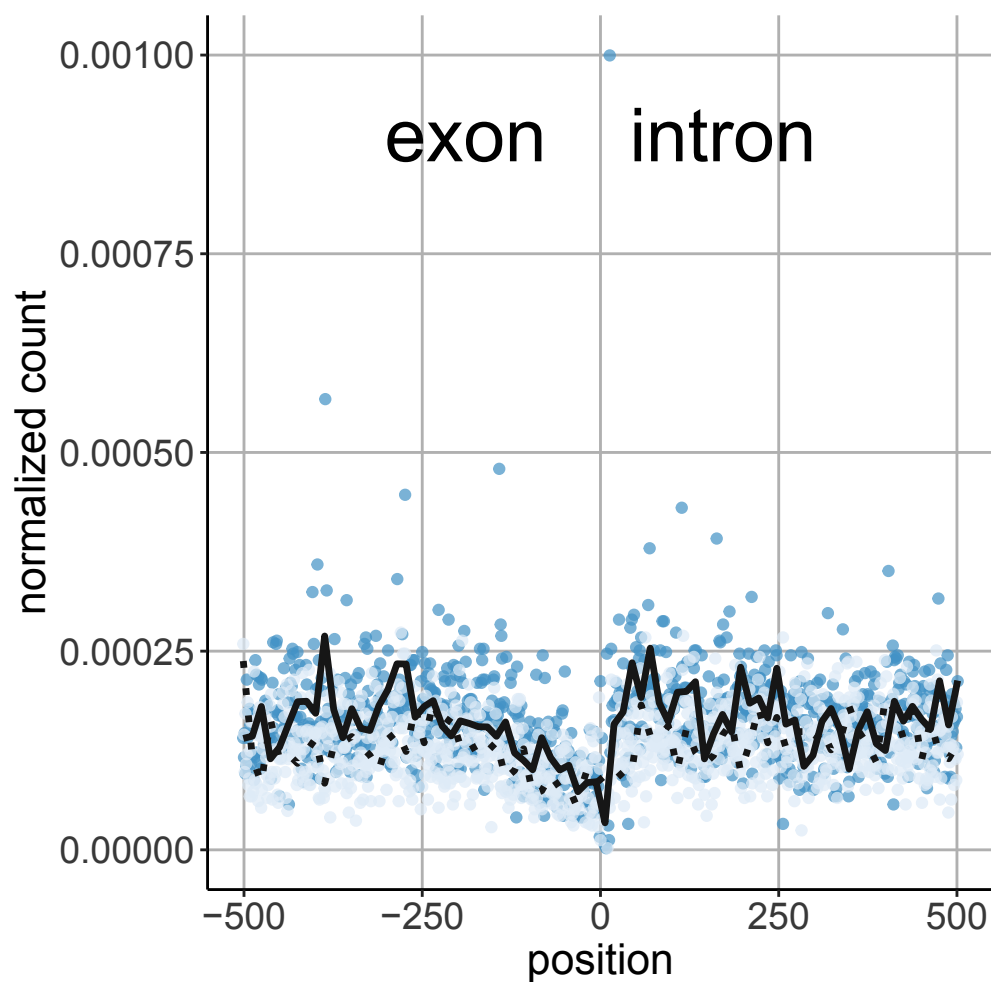

ZCRB1-GUGGACUUA

LARP6-GUGUCNNNNNNNNNGAAGUCN

• antisense — sense • antisense • sense

• antisense — sense • antisense • sense

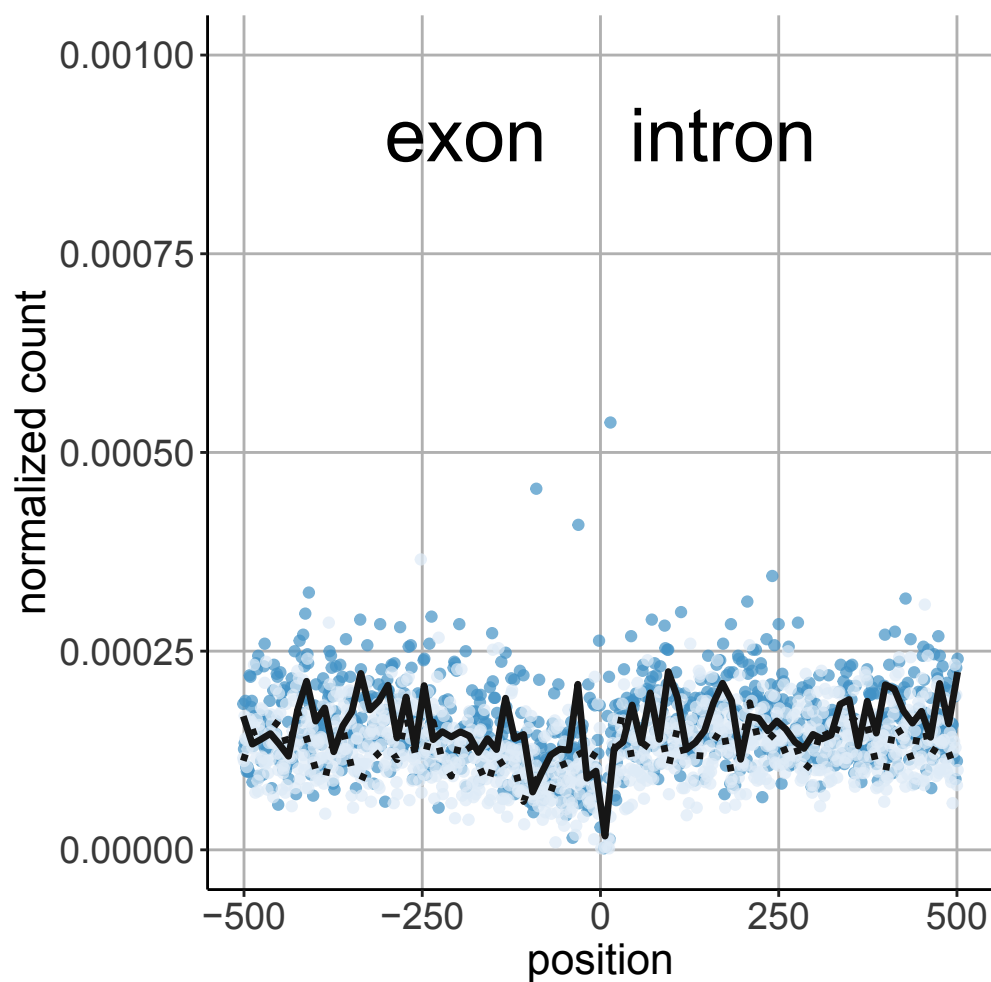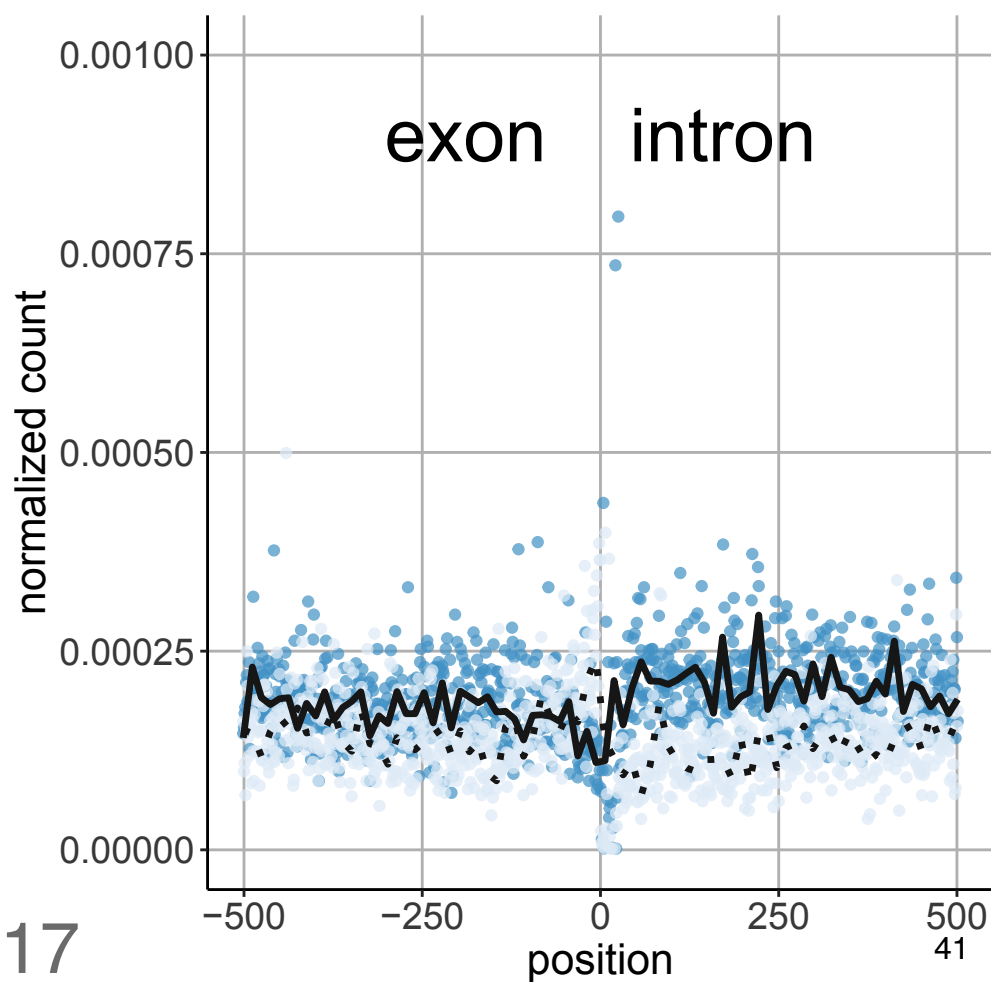

donor

DAZ1\_2-NNUGUGUGSGUUUCCGSN

• antisense — sense    • antisense • sense

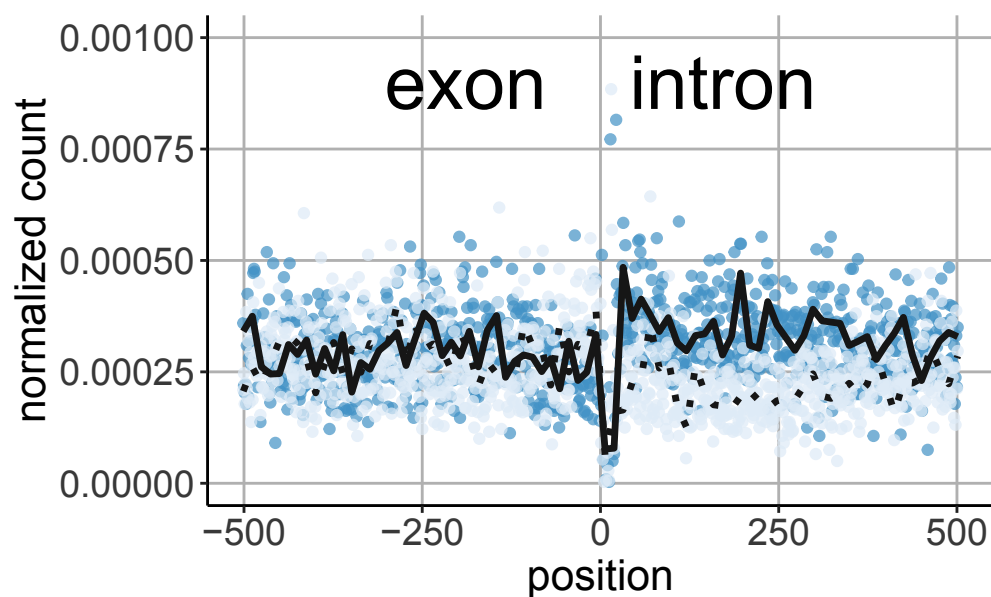

DAZ1\_2-NUGKUGUUGUAGN

• antisense — sense    • antisense • sense

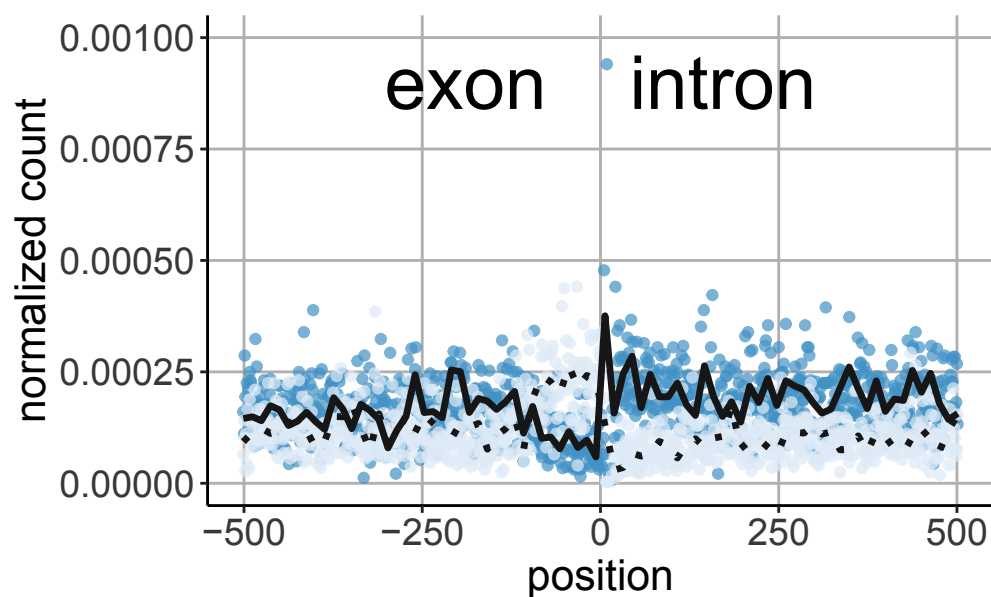

DAZ1\_2-CRNAUGUUAGUAGN

• antisense — sense    • antisense • sense

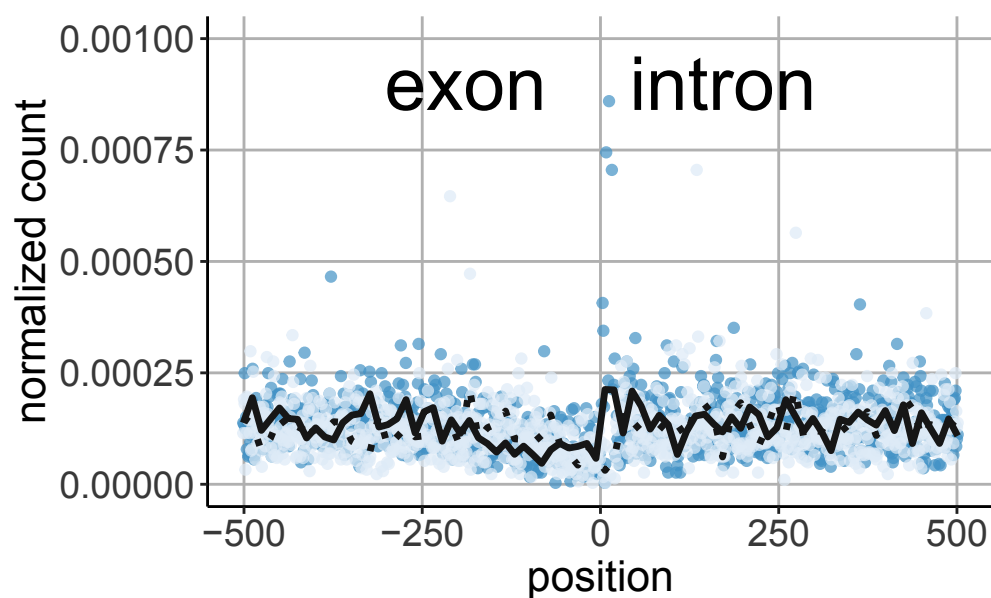

DAZ3-NNUGUGUGSGUUUCCGSN

• antisense — sense    • antisense • sense

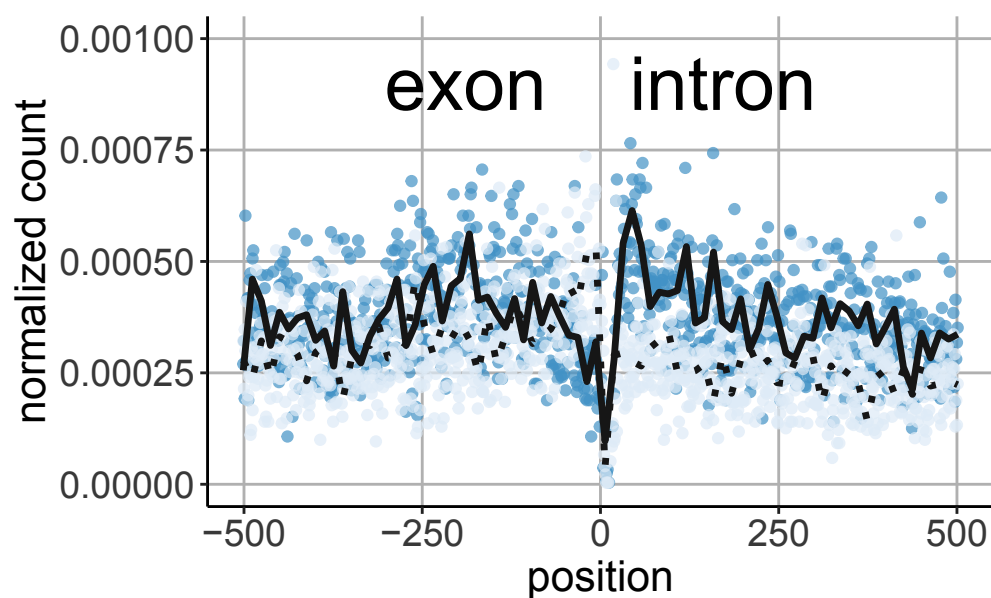

DAZ4-NNUGUGUGSGUUUCCGSN

• antisense — sense    • antisense • sense

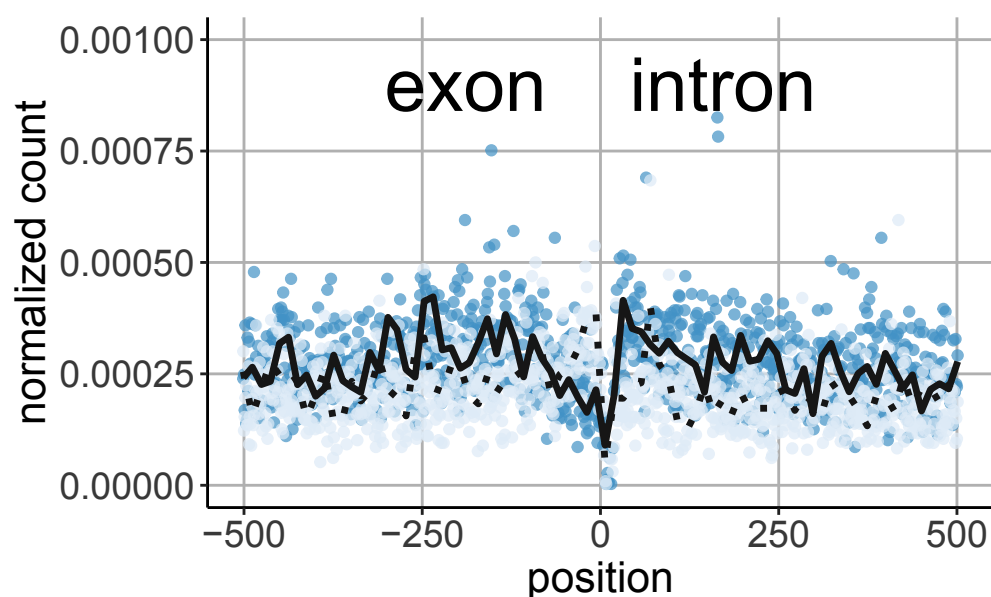

DAZ4-CUGKUGUUGUAGG

• antisense — sense    • antisense • sense

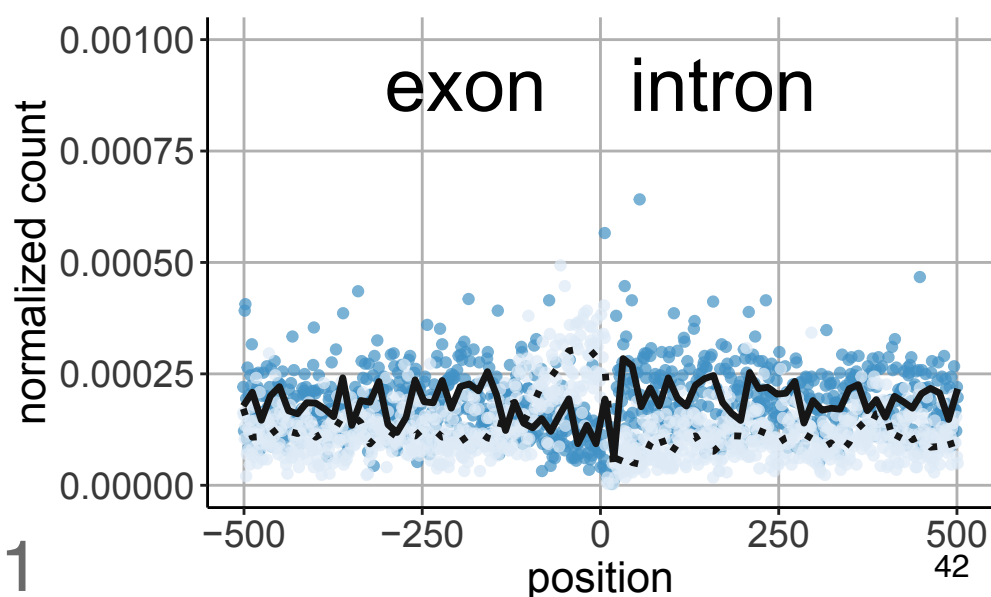

1

42

donor

DAZL-NNUGYGUGCGUUUCCGSN

• antisense — sense    • antisense • sense

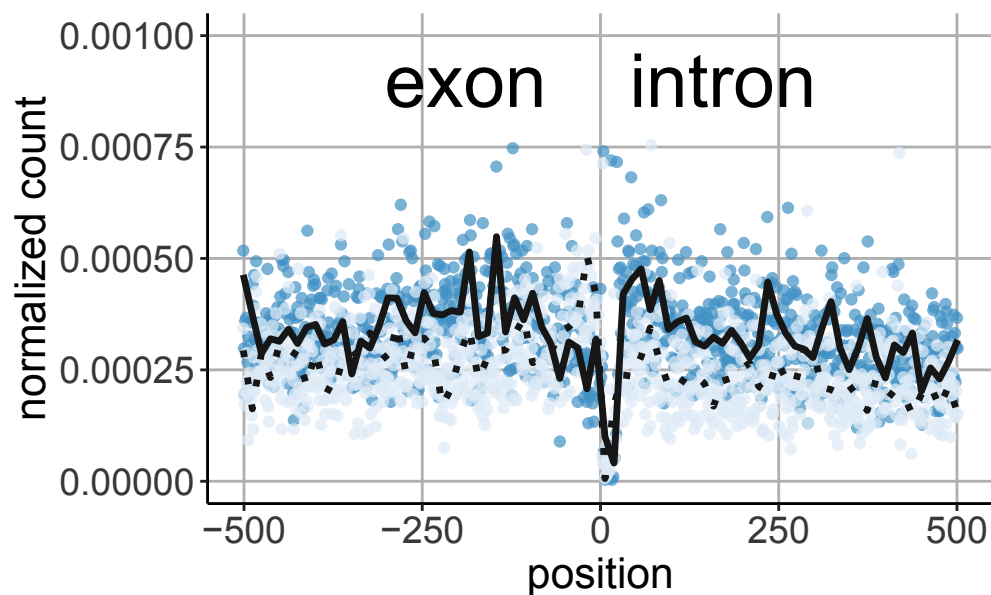

HNRNPA1-NGCAGUUUUAGGGCN

• antisense — sense    • antisense • sense

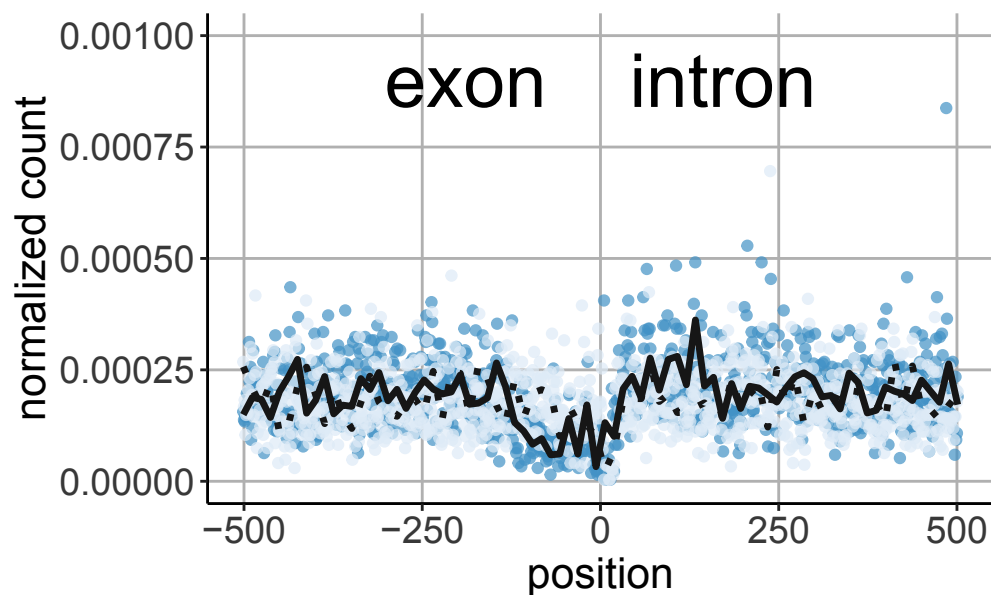

HNRNPC-NGGGUCUNAUUUUUUAAN

• antisense — sense    • antisense • sense

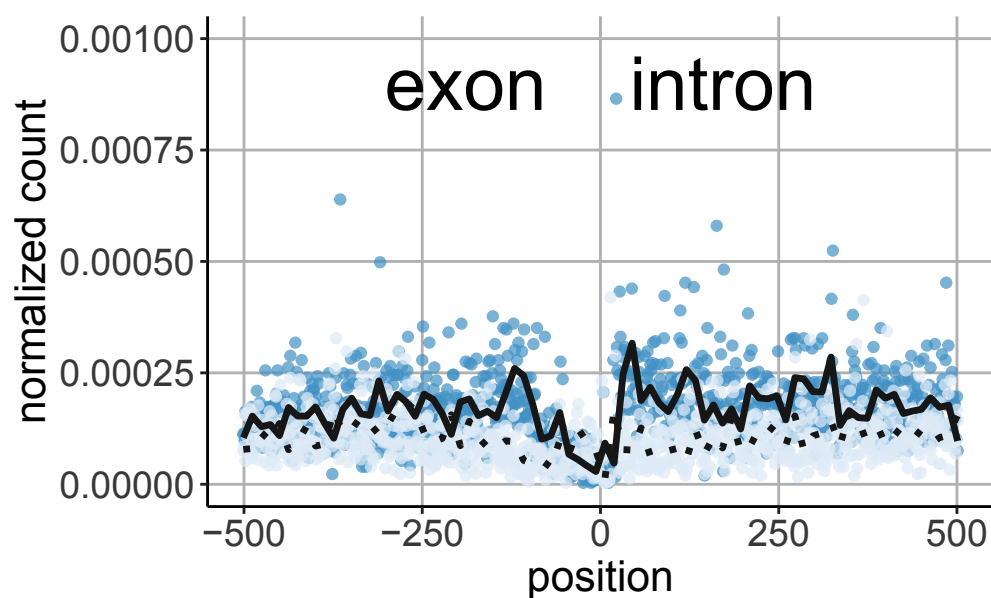

HNRNPCL1-NGGGUCUNAUUUUUUAAN

• antisense — sense    • antisense • sense

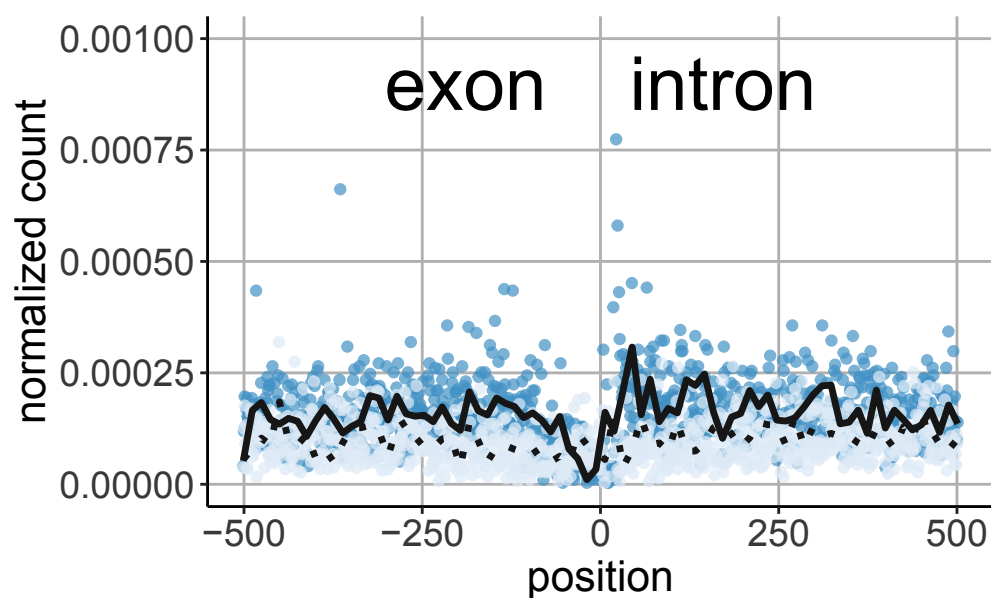

MKRN1-NYGUAAAKUGUAGN

• antisense — sense    • antisense • sense

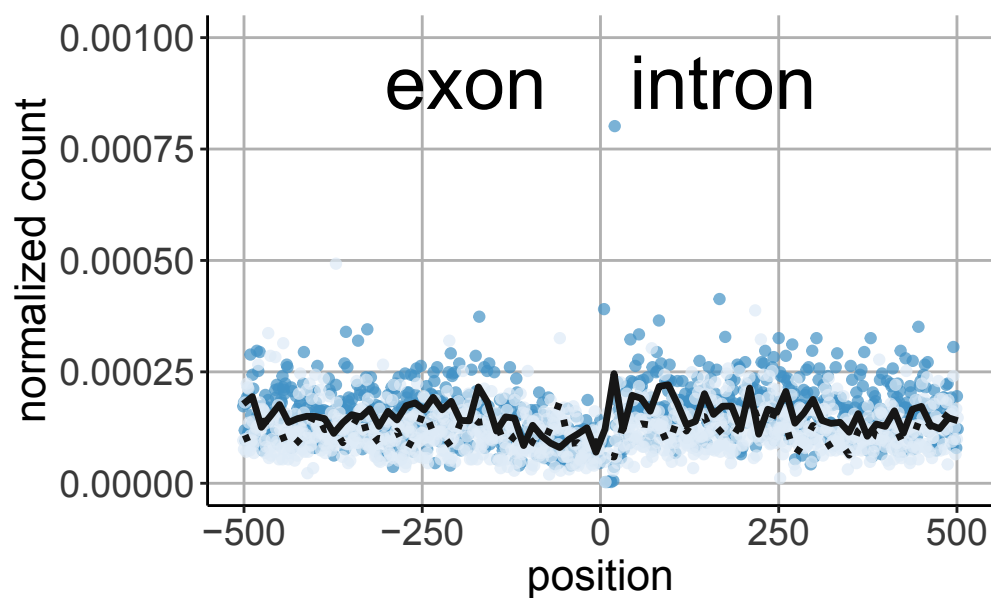

RALY-GGGUCUWUUUUUUA

• antisense — sense    • antisense • sense

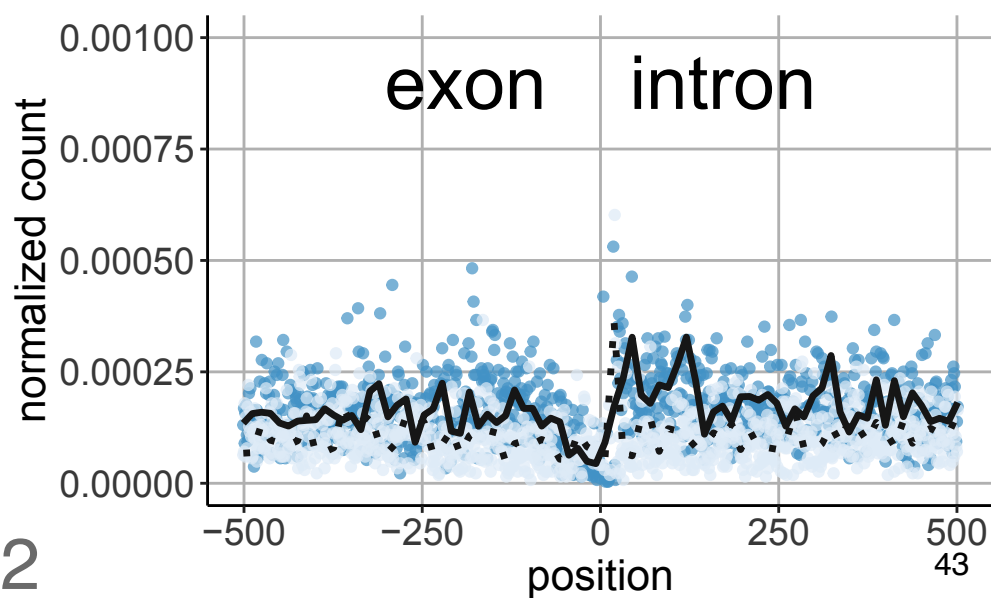

donor

RBFOX1\_4-GKUGCAUGUG

•• antisense — sense    • antisense • sense

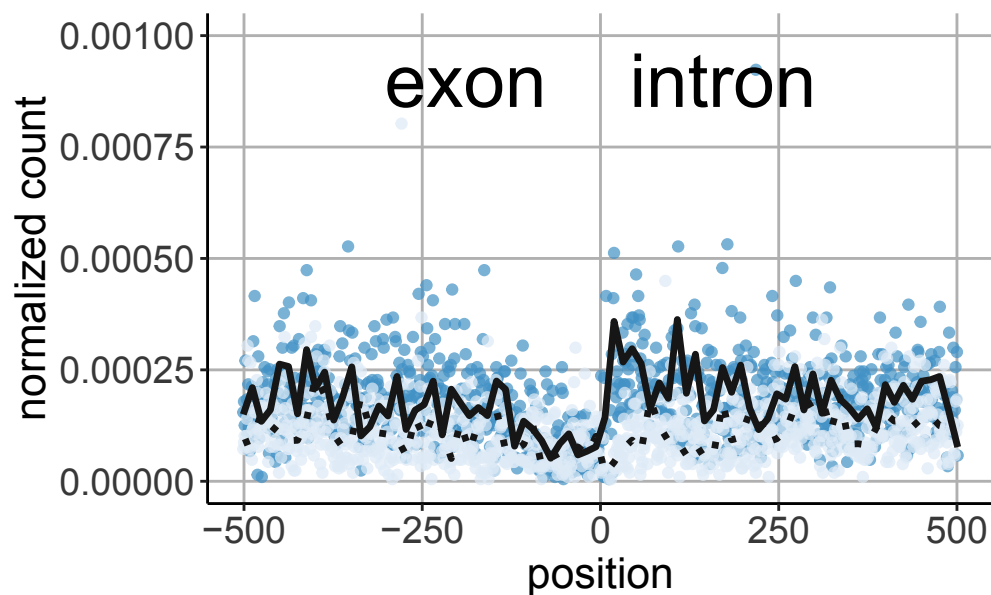

RBFOX3-GUWGCAUGUG

•• antisense — sense    • antisense • sense

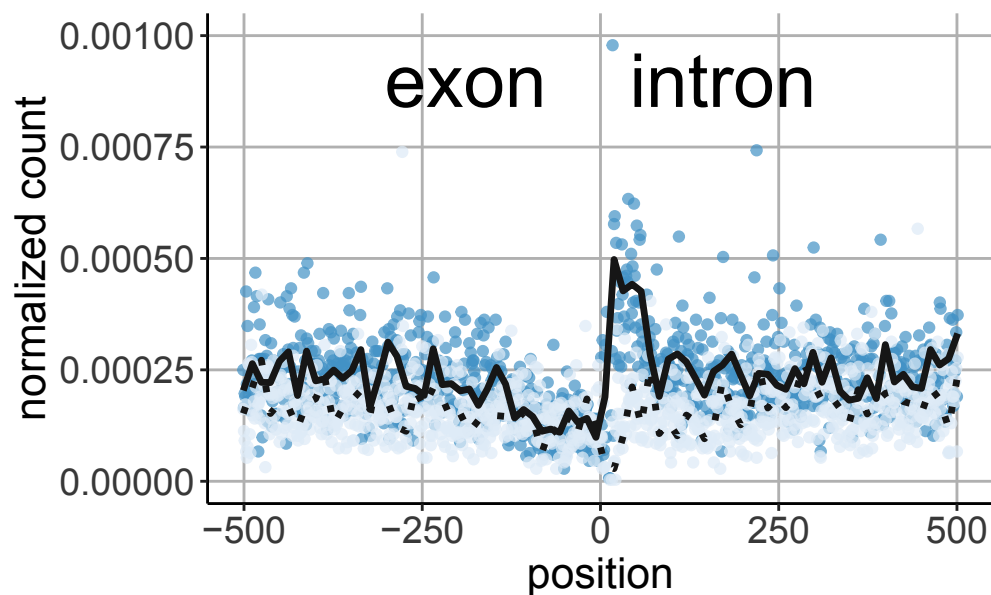

RBM4-KGUUGCGCGGG

•• antisense — sense    • antisense • sense

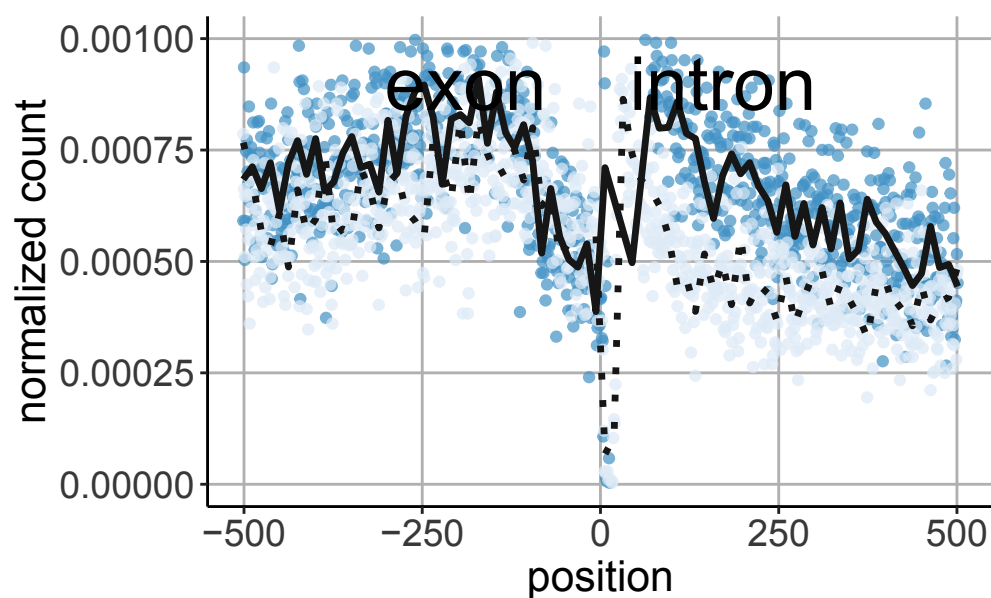

RBM4-UGAGUGCGGUAG

•• antisense — sense    • antisense • sense

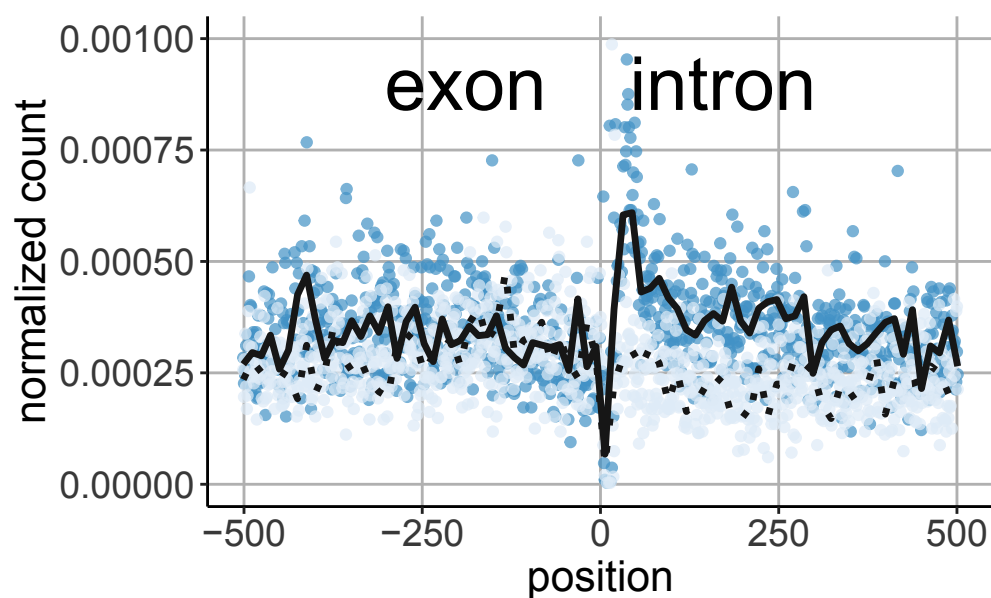

RBM4B-KGUUGCGCGGG

•• antisense — sense    • antisense • sense

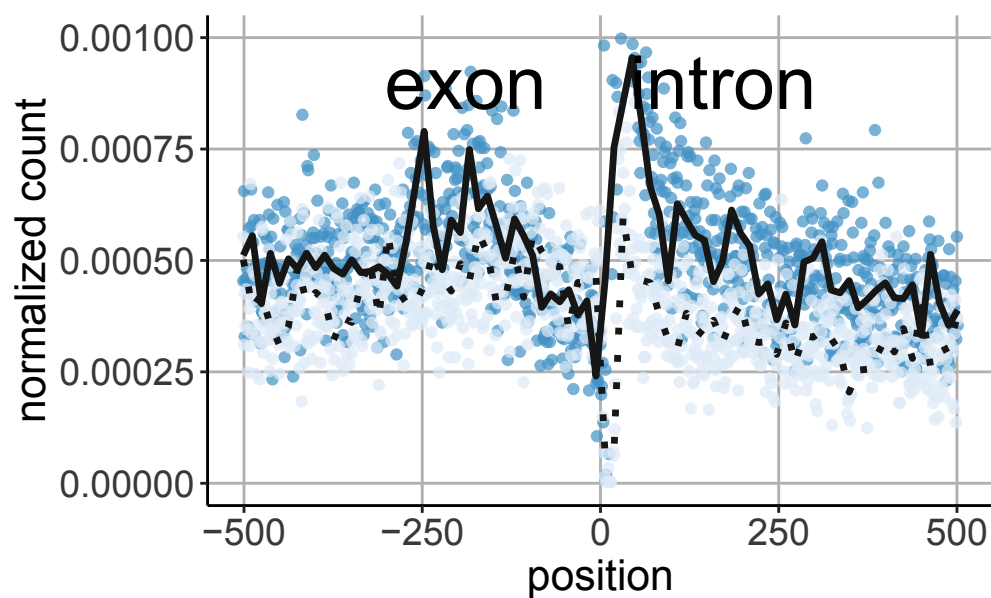

RBM4B-UGAGUGCGGUAG

•• antisense — sense    • antisense • sense

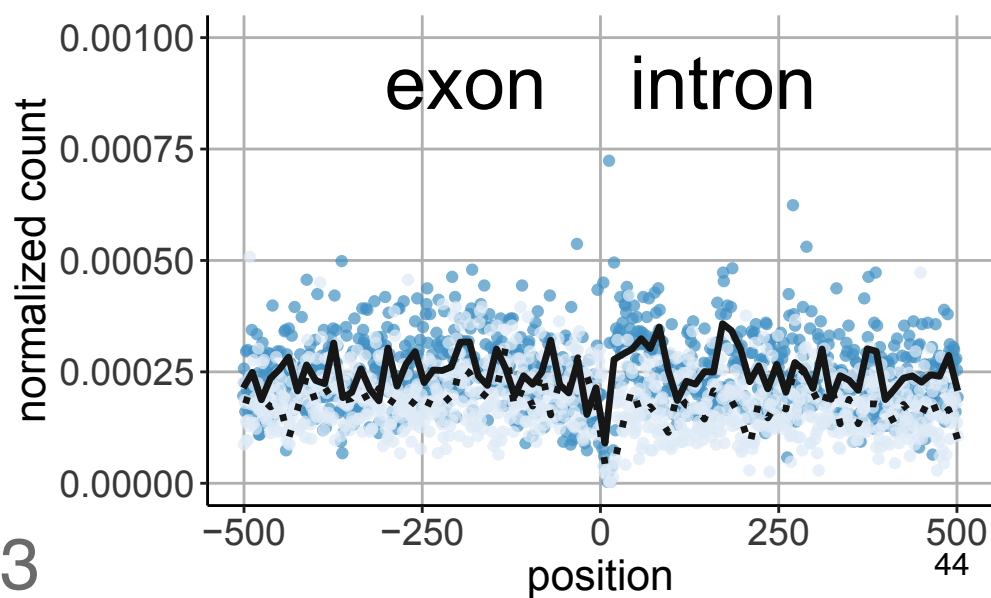

donor

RBM6-YRCGCUCCUNGCY

• antisense — sense    • antisense • sense

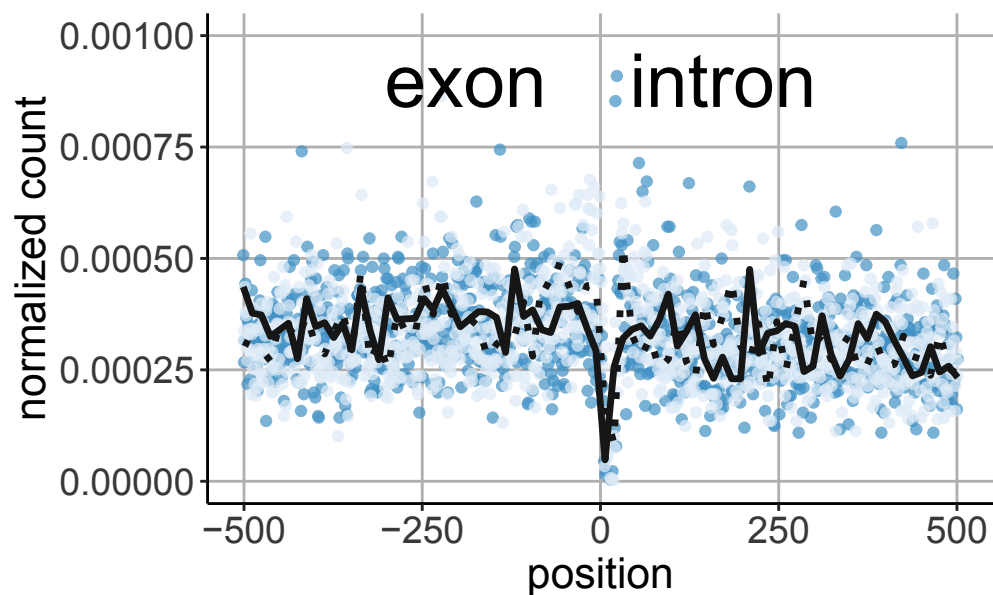

RBM6-YRYGCUCGUGGCYN

• antisense — sense    • antisense • sense

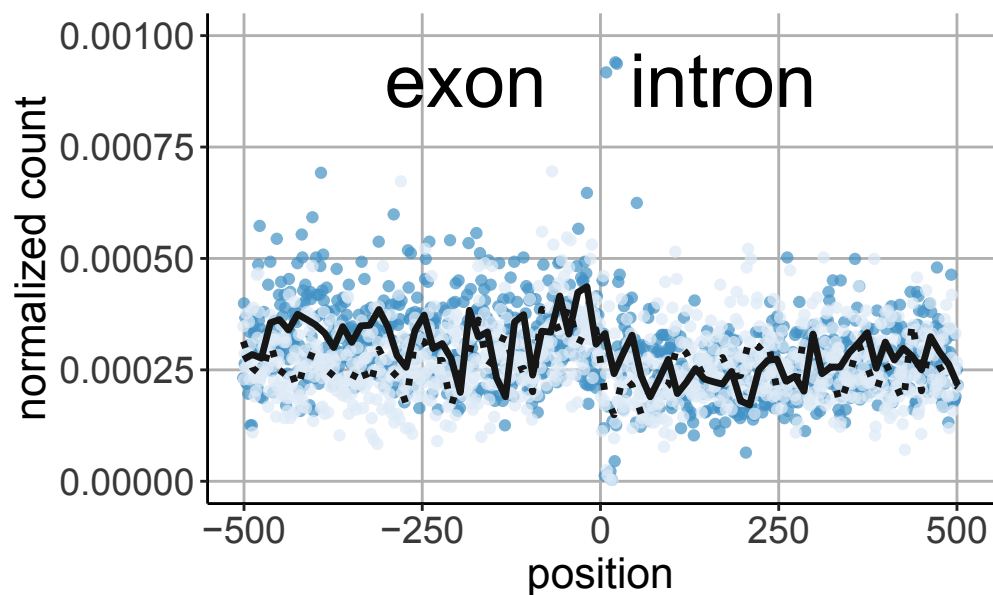

RBMS1-SGUGCAUAAKGCN

• antisense — sense    • antisense • sense

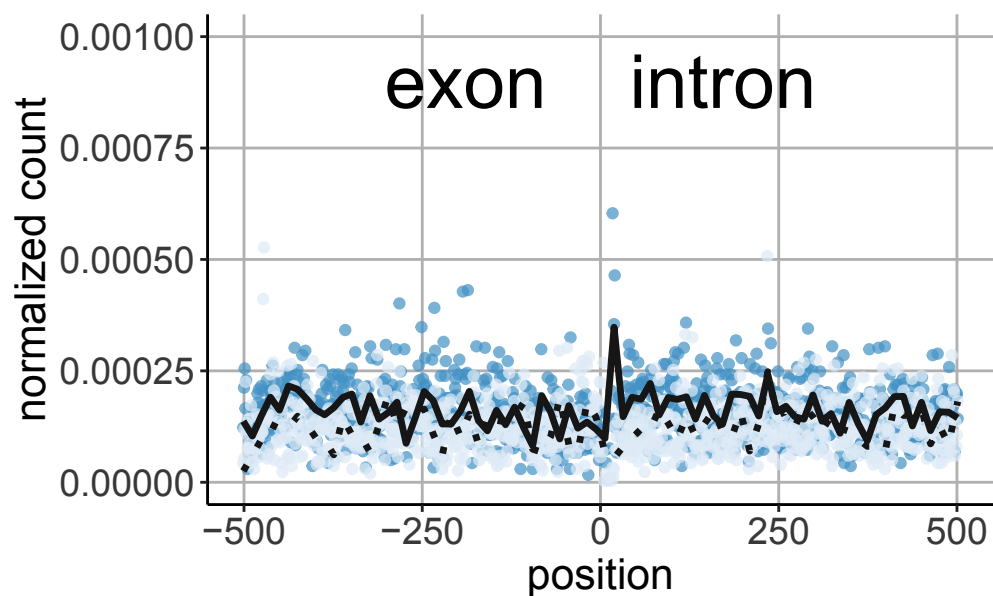

RBMS2-NUGCAUAAUGN

• antisense — sense    • antisense • sense

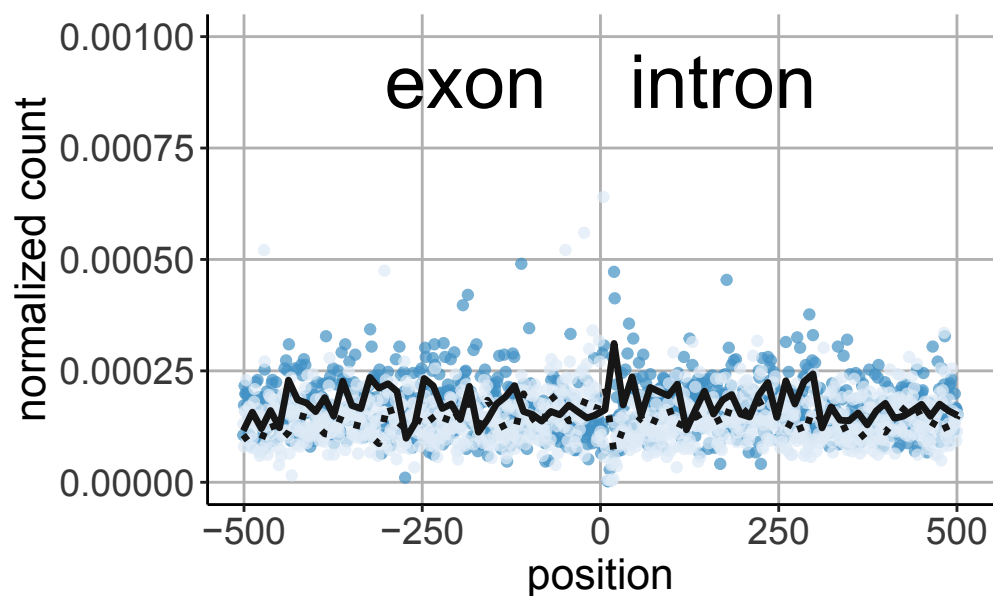

RBMS3-NUGCAUAAUGN

• antisense — sense    • antisense • sense

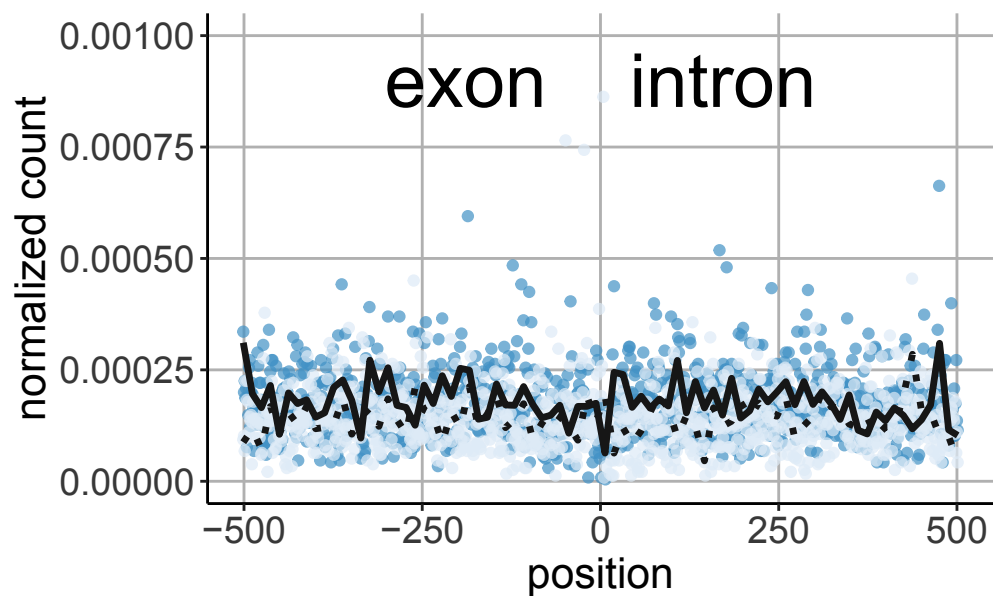

RBMS3-SAUGYAUAAKUG

• antisense — sense    • antisense • sense

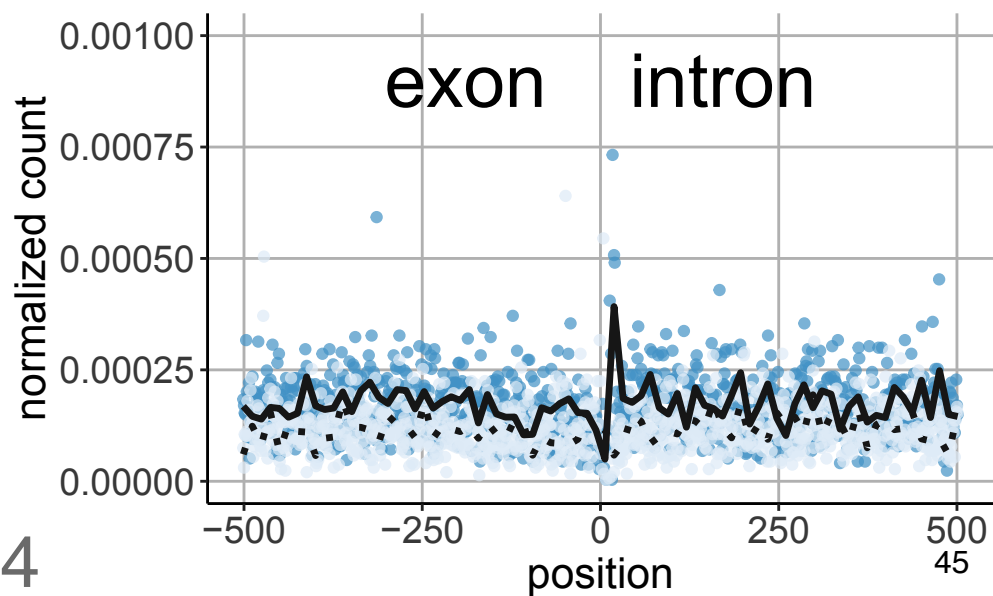

donor

RBMY1E-NGCUUCGNGCN

• antisense — sense    • antisense • sense

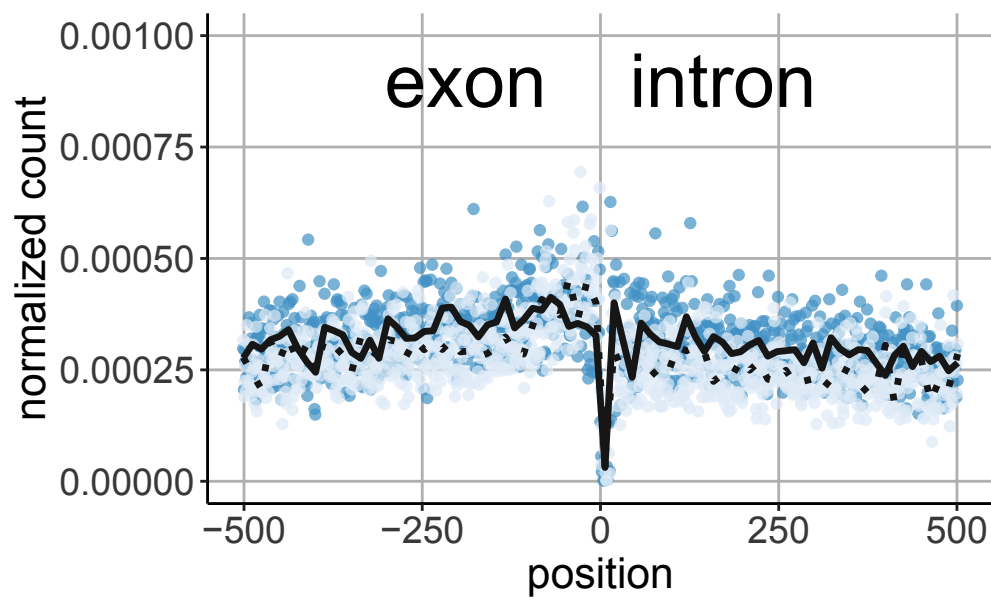

RBMY1E-NAGCUUNGUGCUN

• antisense — sense    • antisense • sense

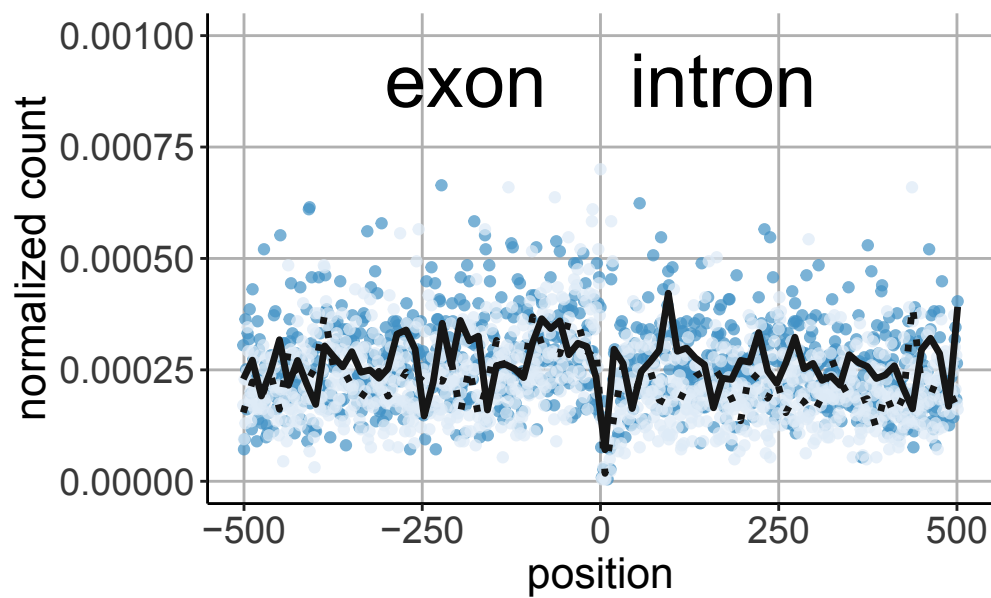

RBMY1F-NGCCCUCAAGGYN

• antisense — sense    • antisense • sense

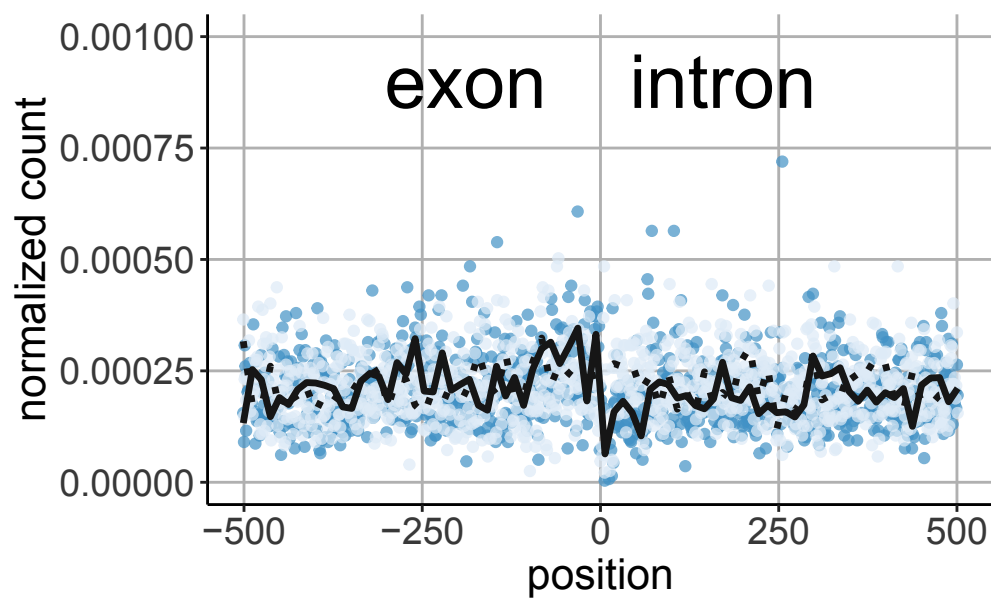

RBMY1F-GCGCAAGAGC

• antisense — sense    • antisense • sense

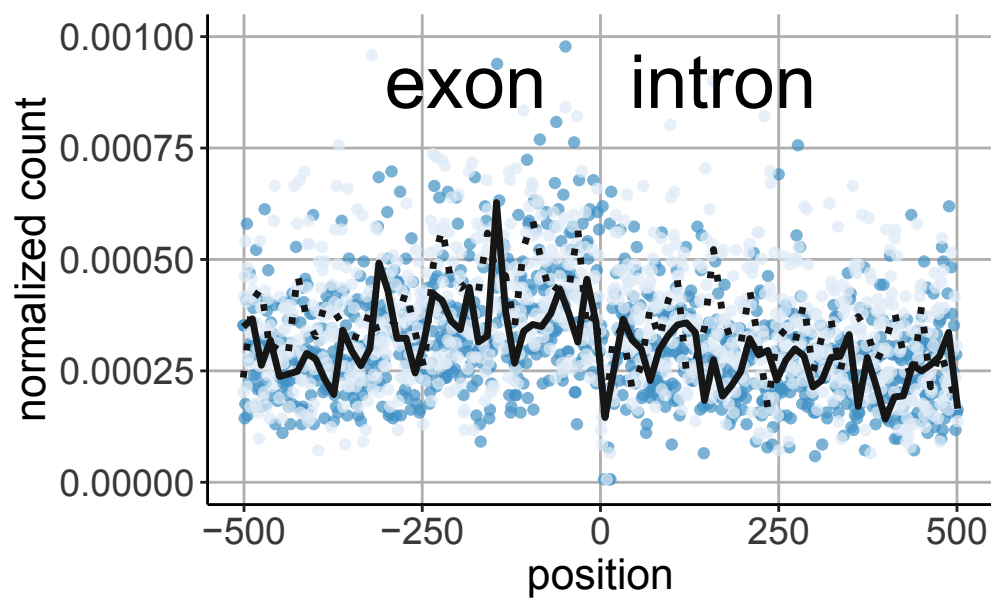

RBMY1J-NGCCCUCAAGGYN

• antisense — sense    • antisense • sense

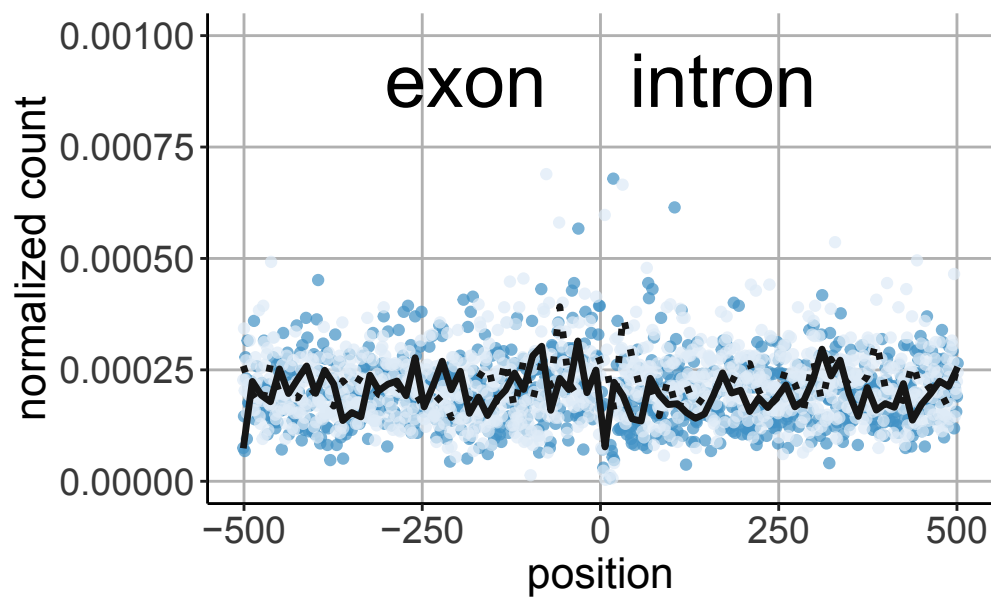

RBMY1J-GCGCAAGAGC

• antisense — sense    • antisense • sense

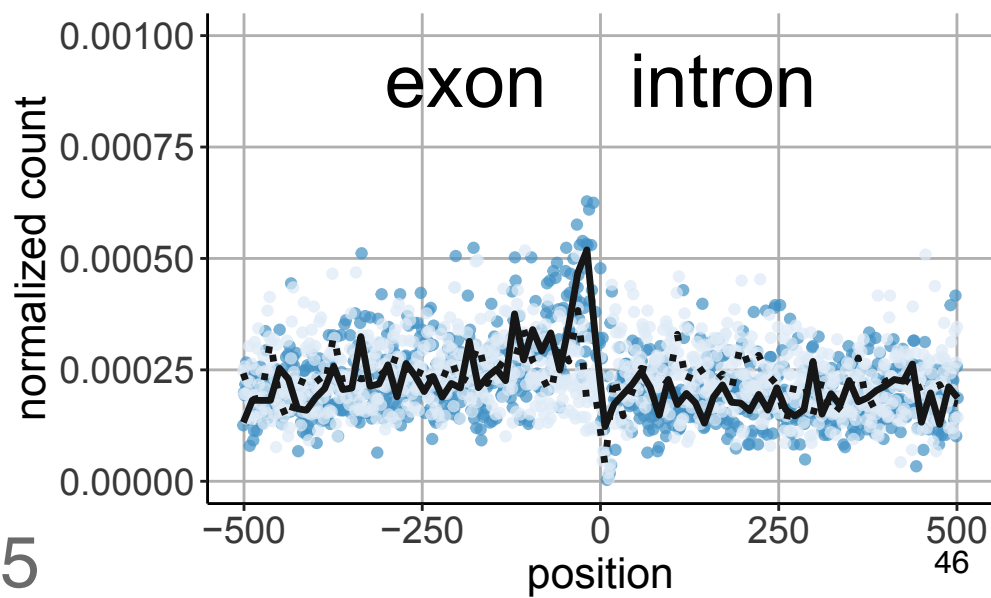

donor

RBM1J-NGCGUCGUGGCN

• antisense — sense • antisense • sense

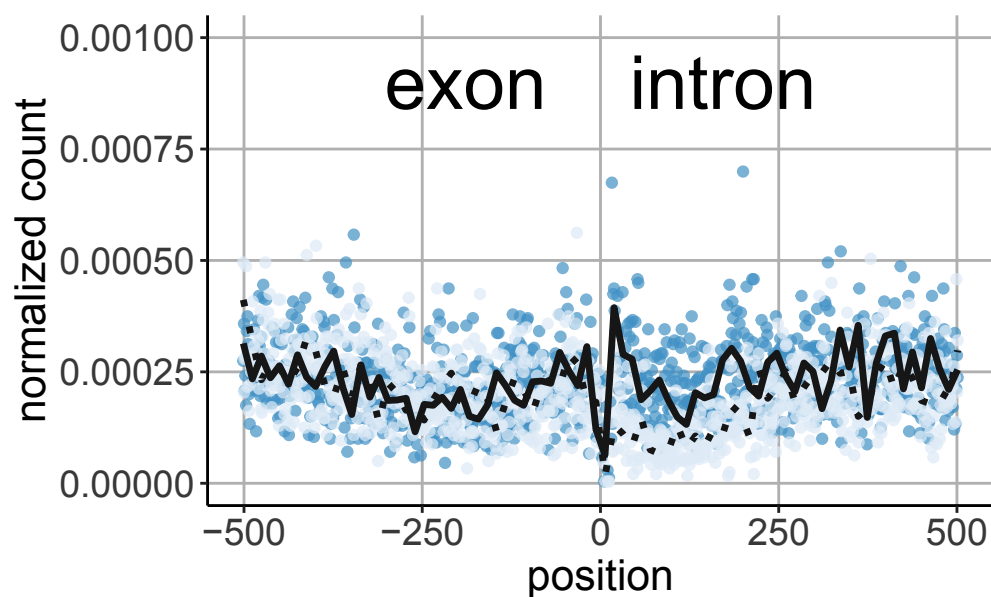

RBM1J-UGAAUUCGUCN

• antisense — sense • antisense • sense

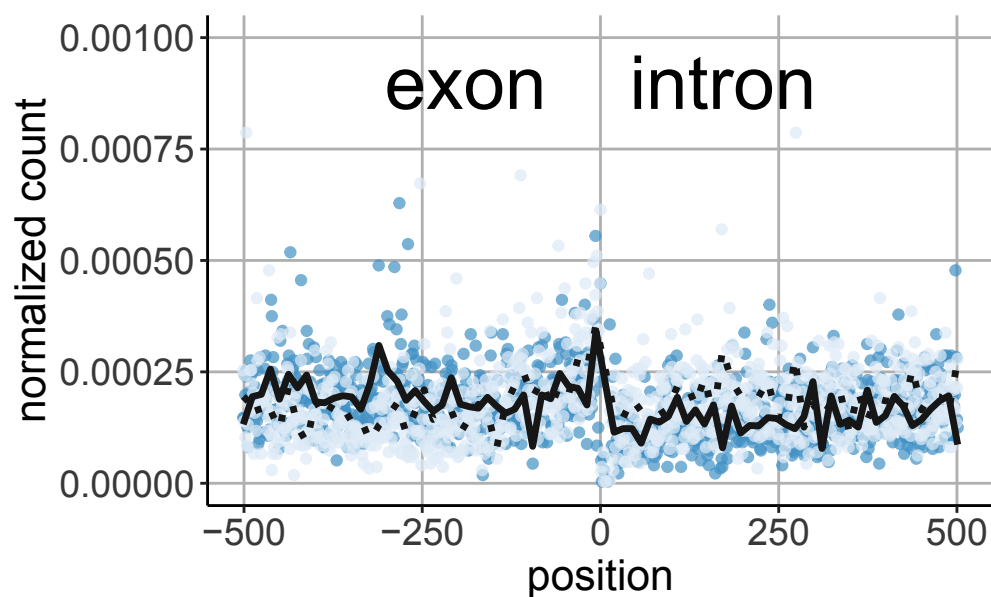

RC3H1\_2-YRCGUUUUAGKR

• antisense — sense • antisense • sense

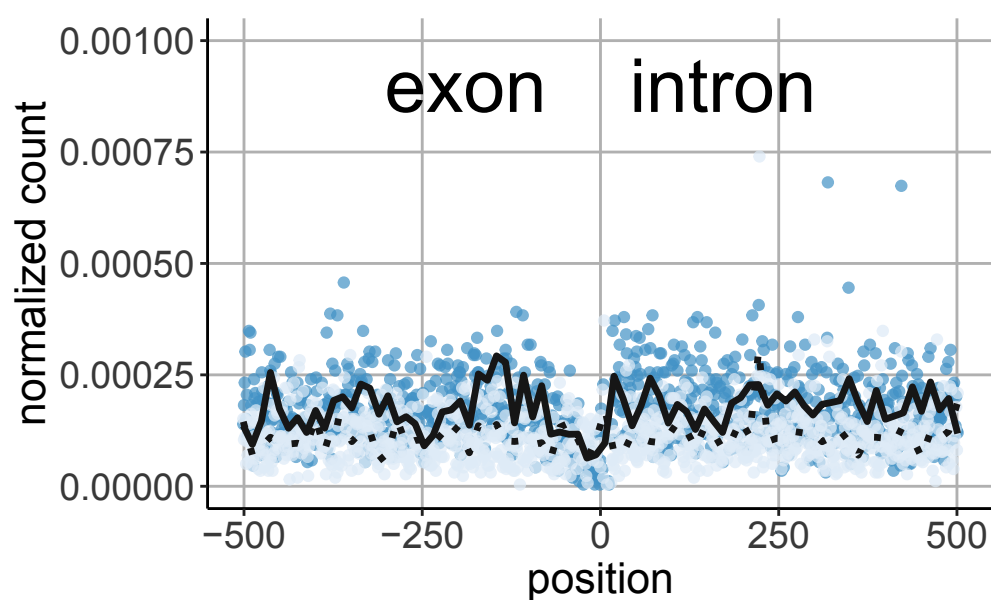

RC3H2-CURCGUUUUAGKAG

• antisense — sense • antisense • sense

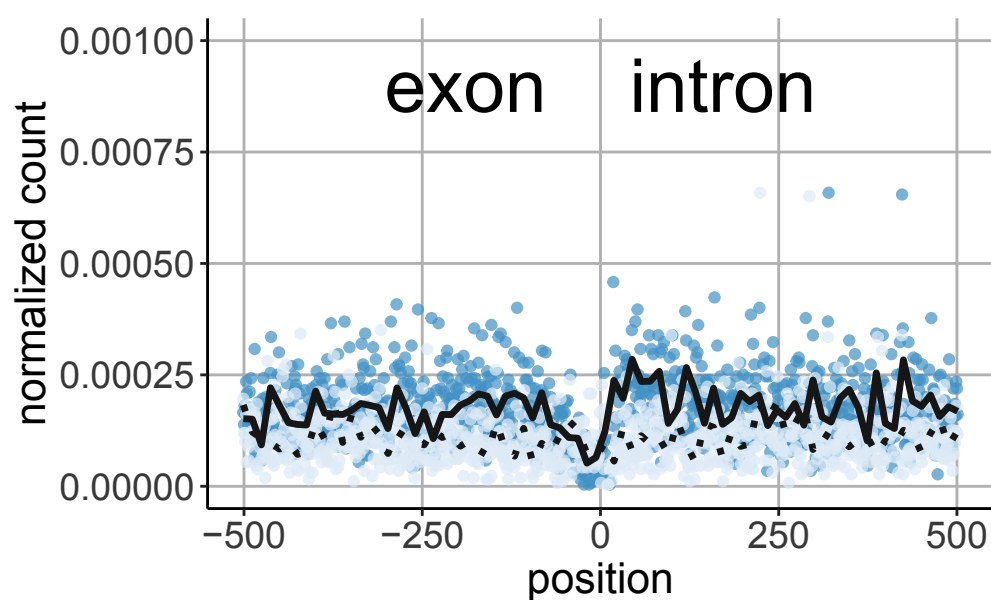

RC3H2-CUCGUAUCGAG

• antisense — sense • antisense • sense

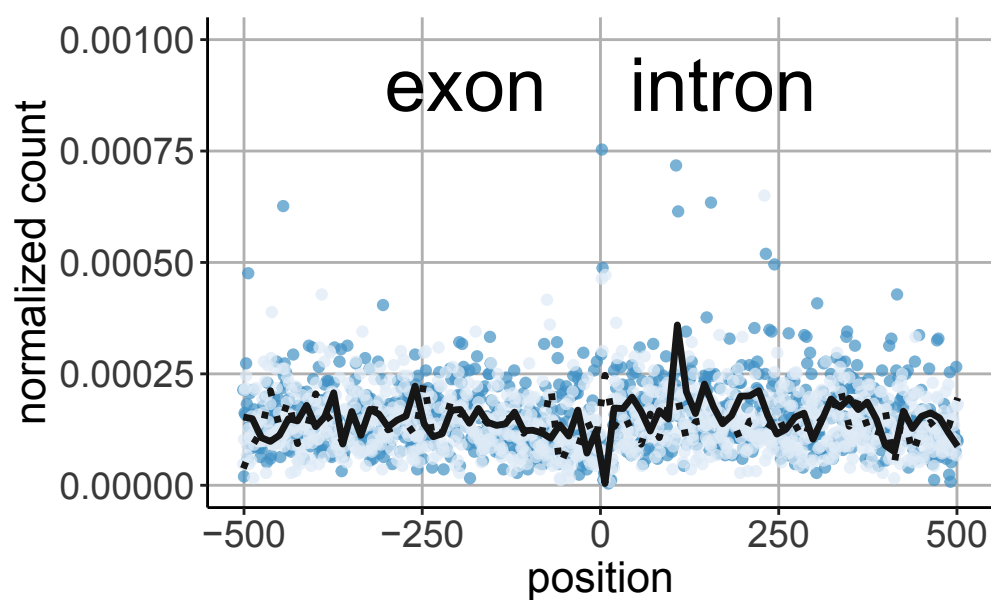

RC3H2-CCUCUNUGAGG

• antisense — sense • antisense • sense

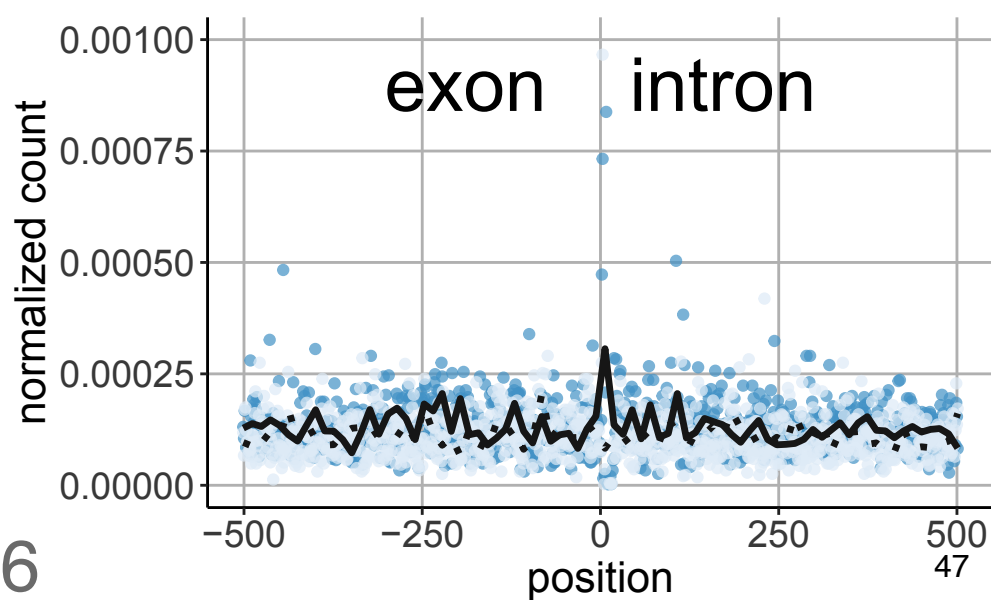



donor

RNPC3-GCAGUKUUAGGGY

• antisense — sense    • antisense • sense

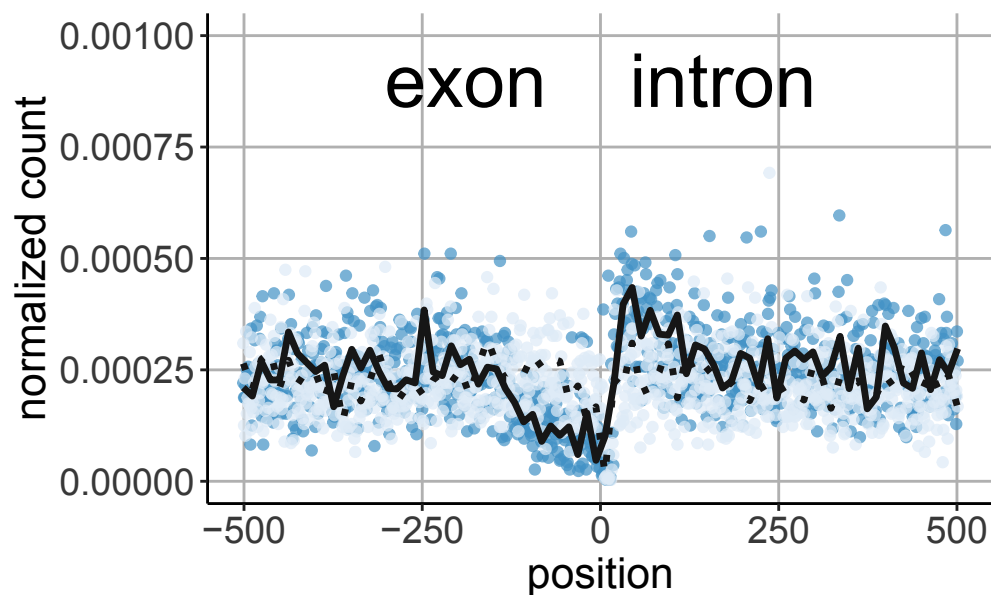

YBX1-RCCAYRHCAUCGY

• antisense — sense    • antisense • sense

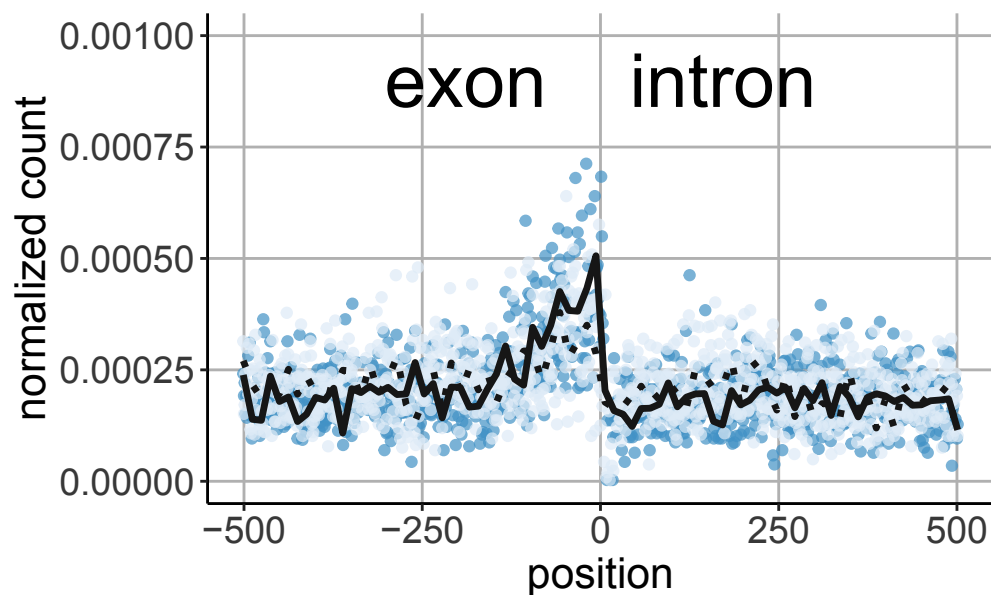

ZC3H12A-NGCAGGUAAGUGCN

• antisense — sense    • antisense • sense

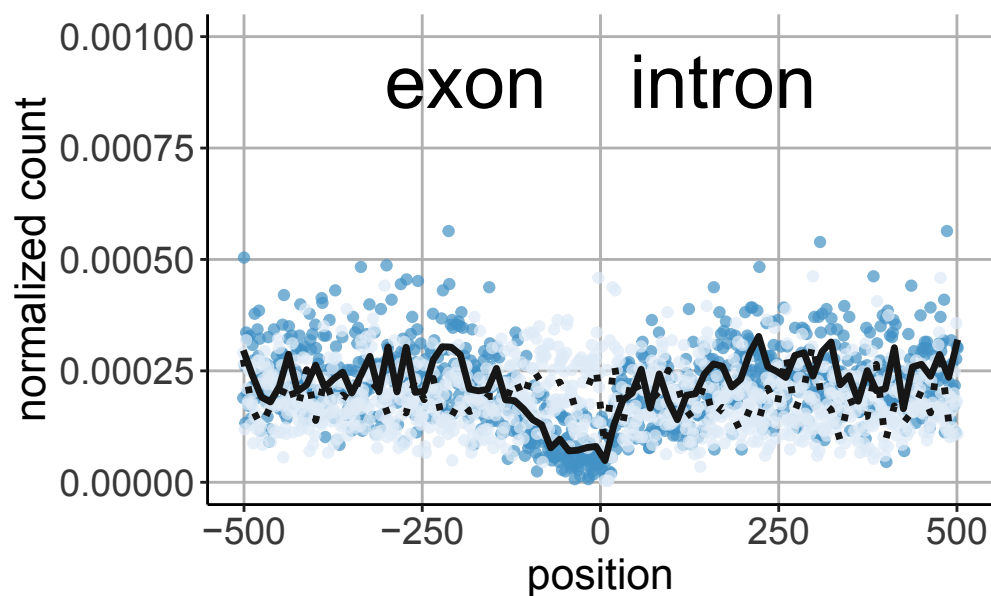

ZC3H12B-NGCAGGUAAGUGSN

• antisense — sense    • antisense • sense

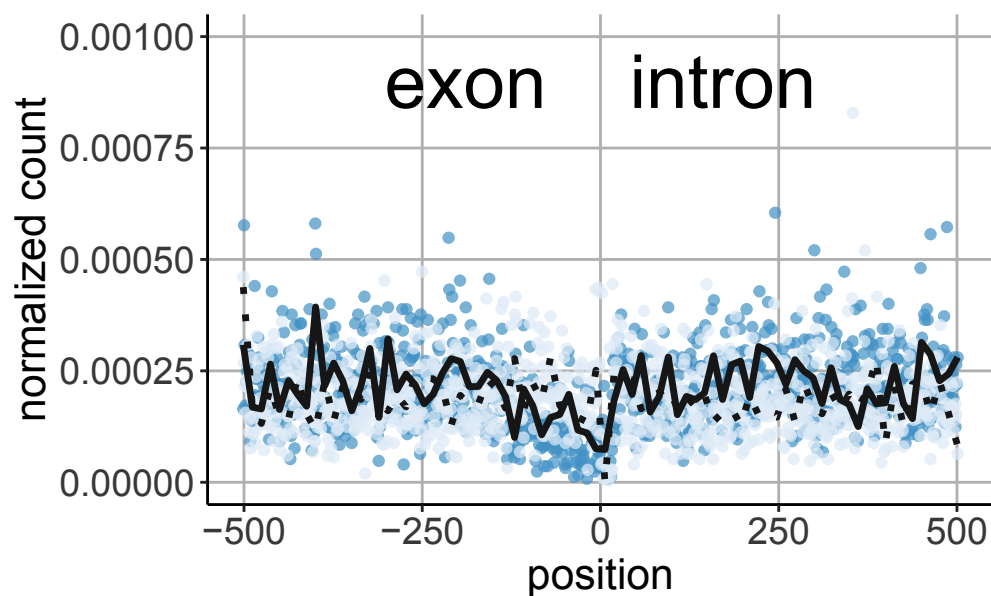

ZC3H12B-SCAGGUAUUAUGS

• antisense — sense    • antisense • sense

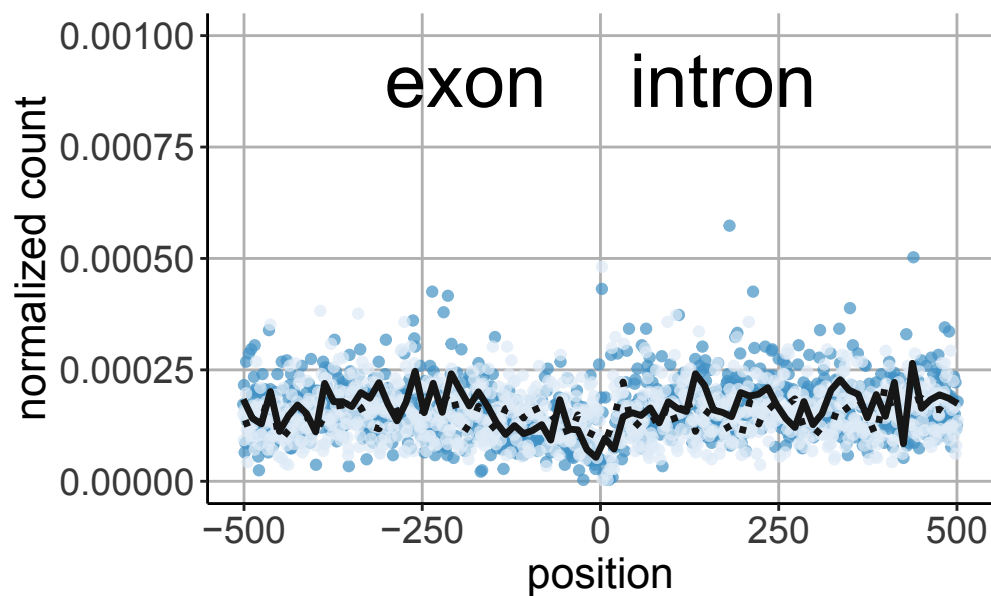

TSS

ZC3H8-GCUUGC

• antisense — sense • antisense • sense

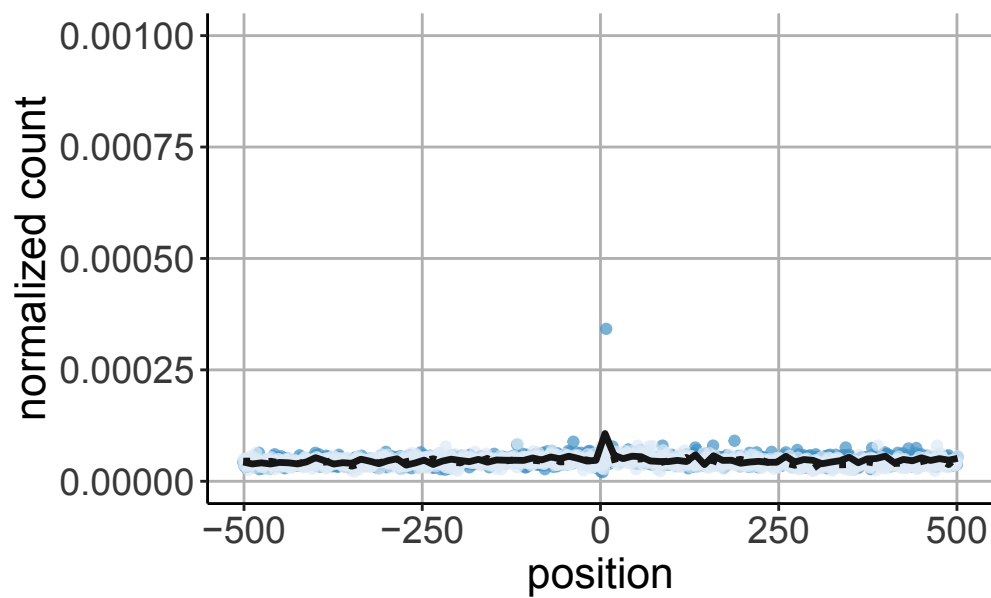

ESRP1\_3-GGUGUUGGUG

• antisense — sense • antisense • sense

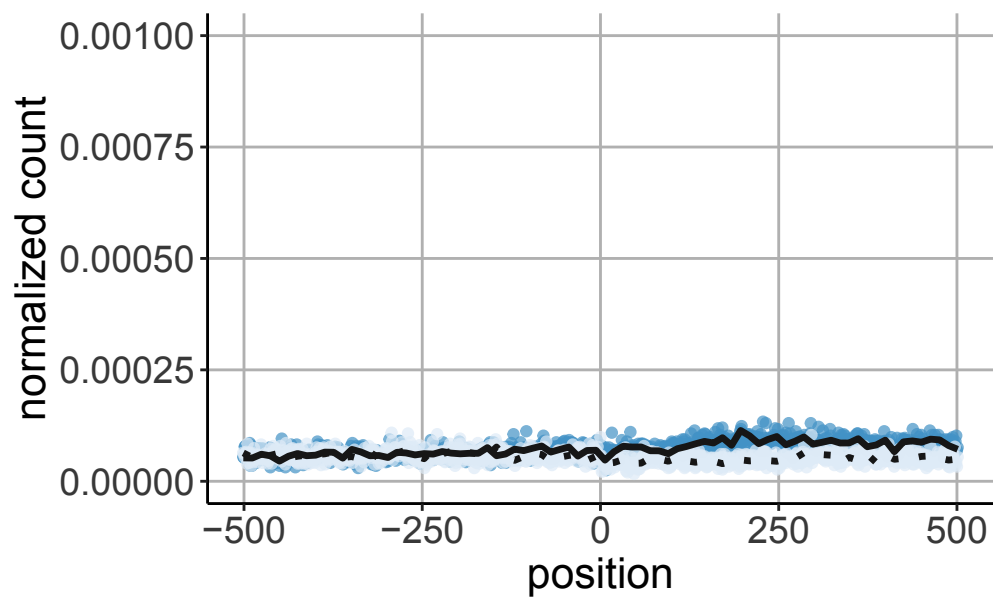

ELAVL3-GUUUUUG

• antisense — sense • antisense • sense

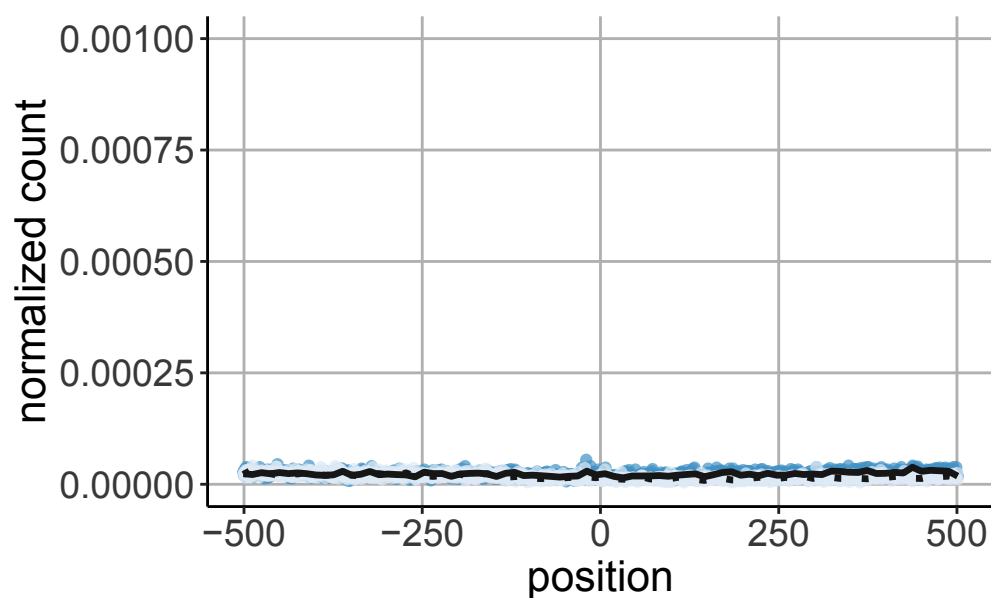

PUM1-NUGUAAAUAG

• antisense — sense • antisense • sense

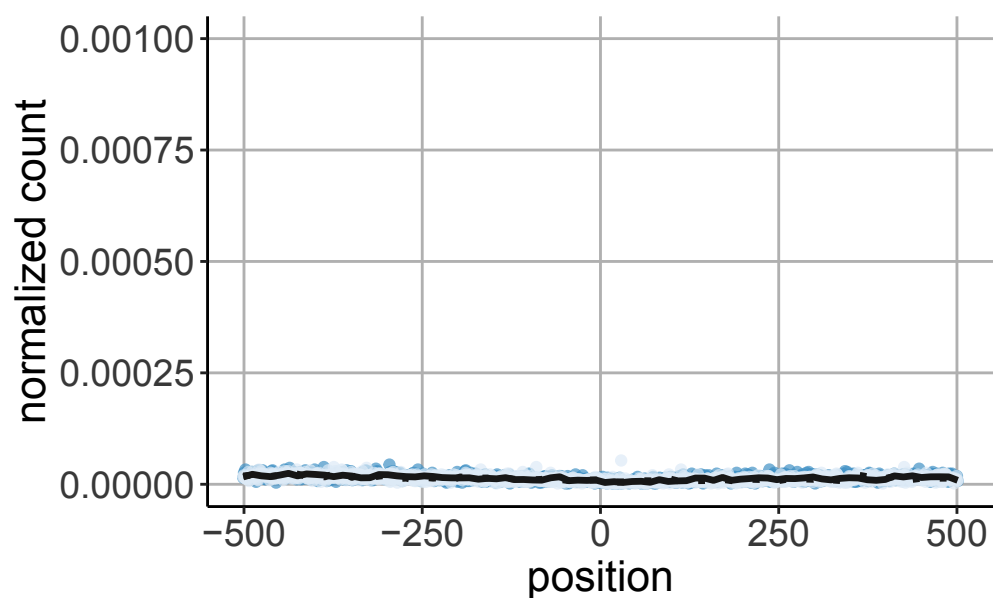

QKI-NUACUAACAWN

• antisense — sense • antisense • sense

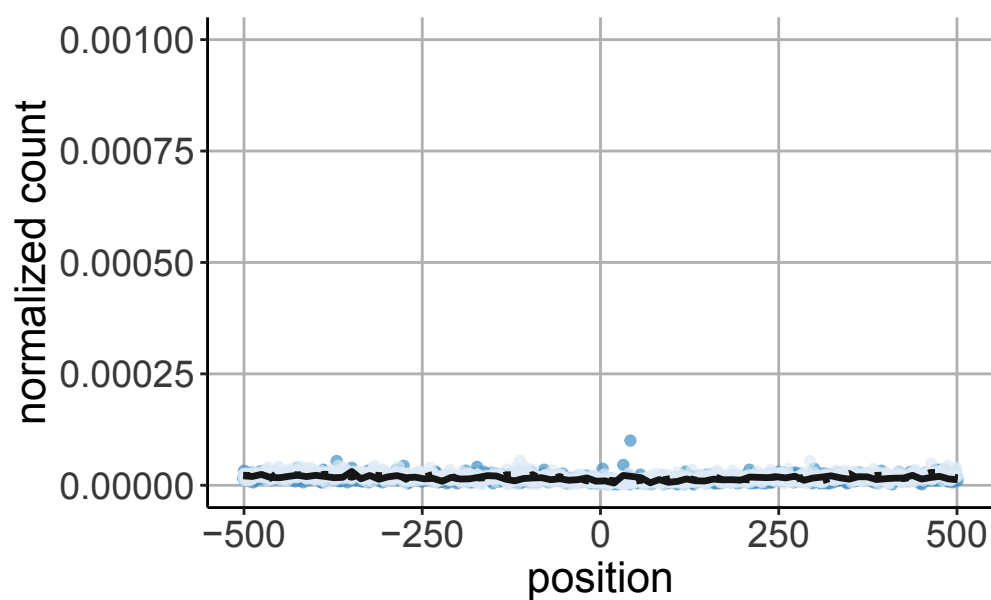

MCM3AP-CGCCAGUGCG

• antisense — sense • antisense • sense

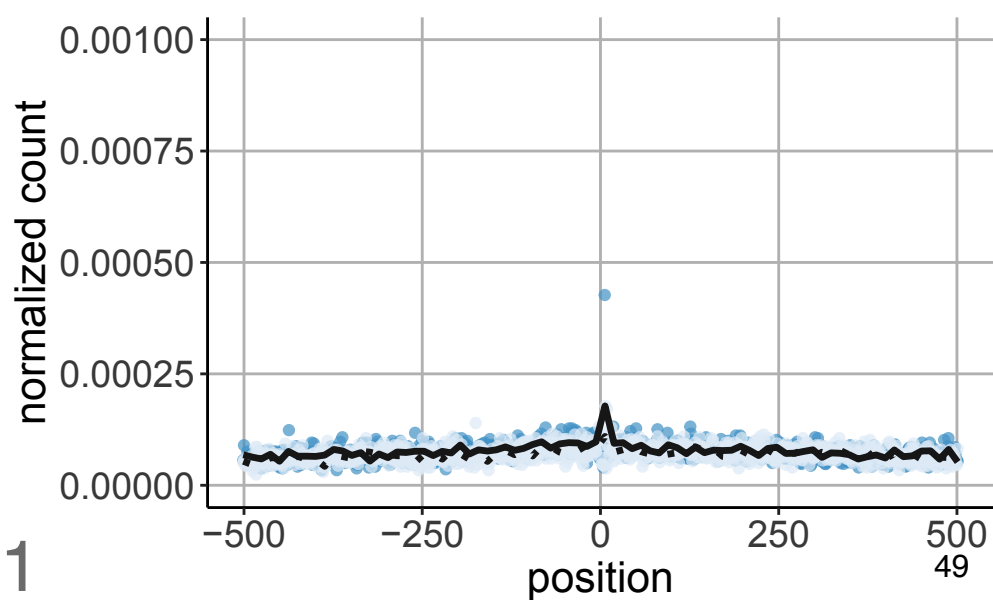

1

49

TSS

HNRNPC-UUUUUGGUGG

• antisense — sense • antisense • sense

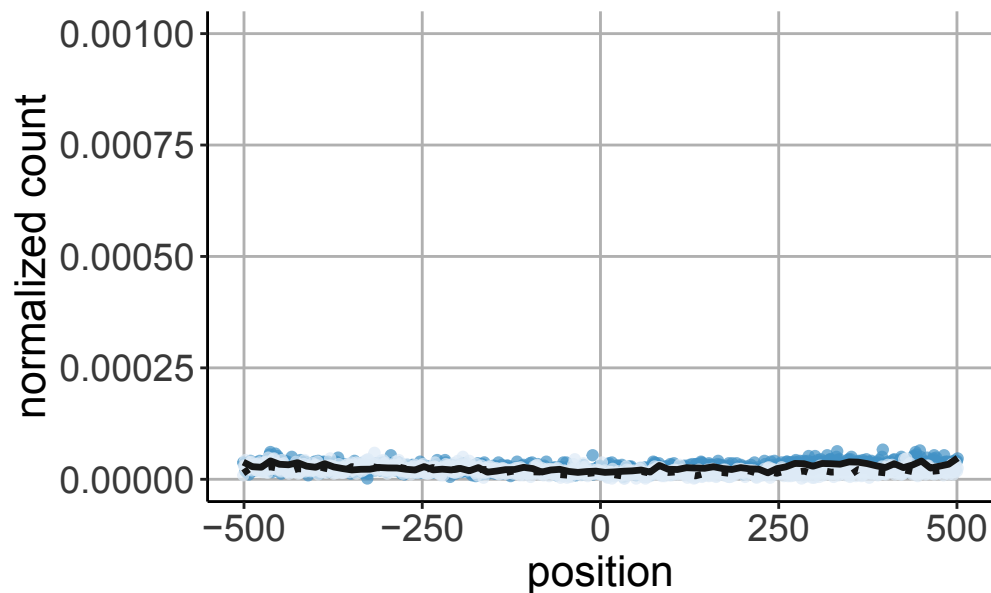

PABPC5-NUAKAAAKUURCN

• antisense — sense • antisense • sense

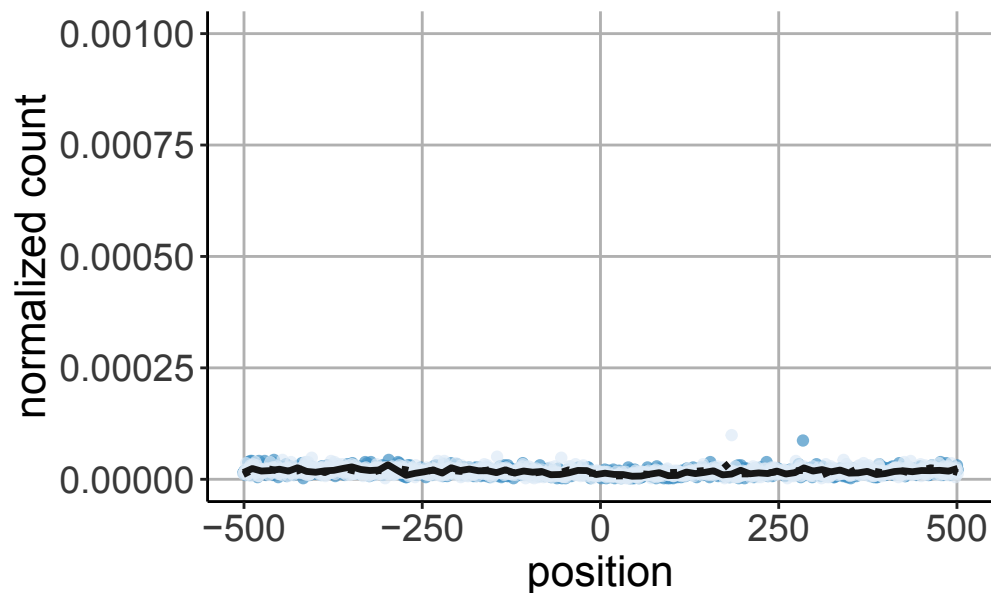

PABPC5-NUAKAAAUUACUACAN

• antisense — sense • antisense • sense

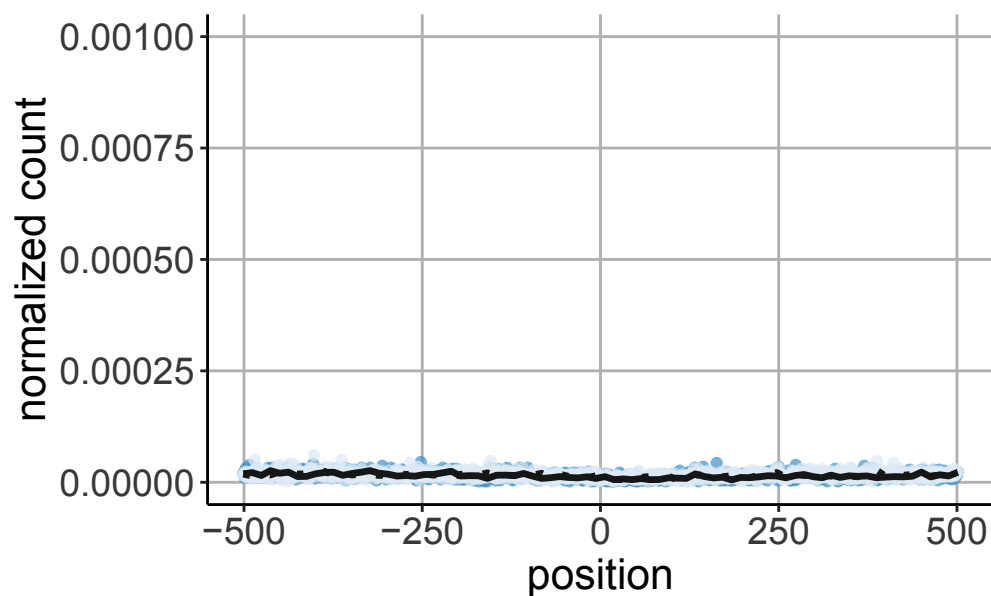

LARP7\_4-GRUCGUGAUGN

• antisense — sense • antisense • sense

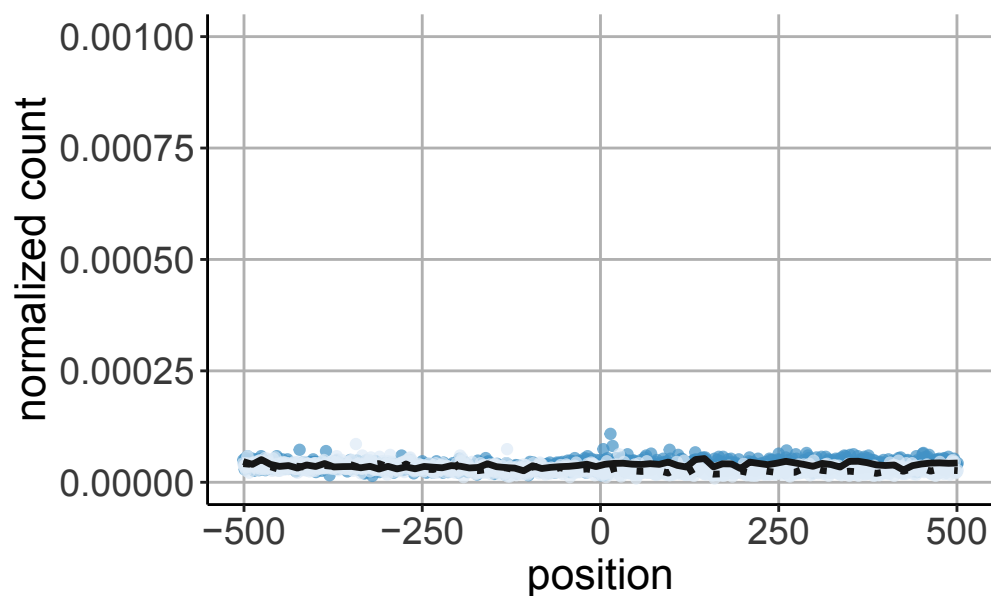

ZCRB1-GUAUUAAGGG

• antisense — sense • antisense • sense

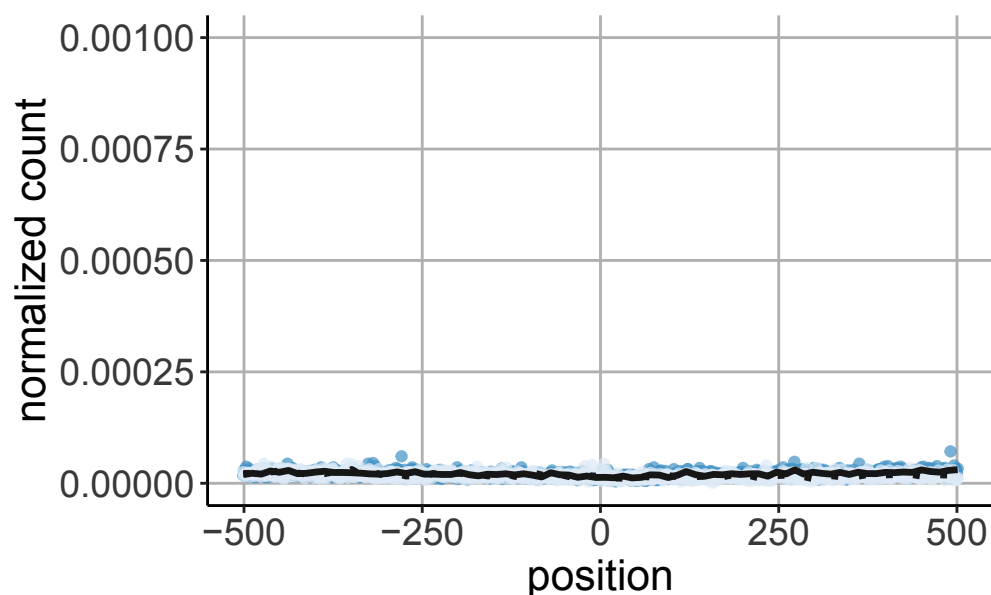

ZCRB1-GUGGACUUAANN

• antisense — sense • antisense • sense

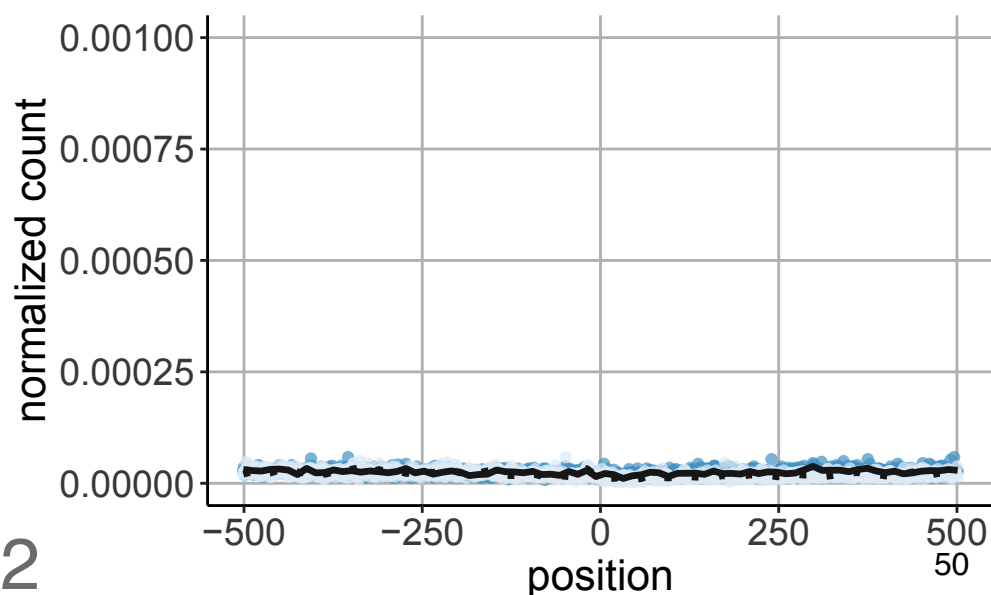

TSS

RBM42-NGGAACUAAN

▪ antisense — sense    • antisense • sense

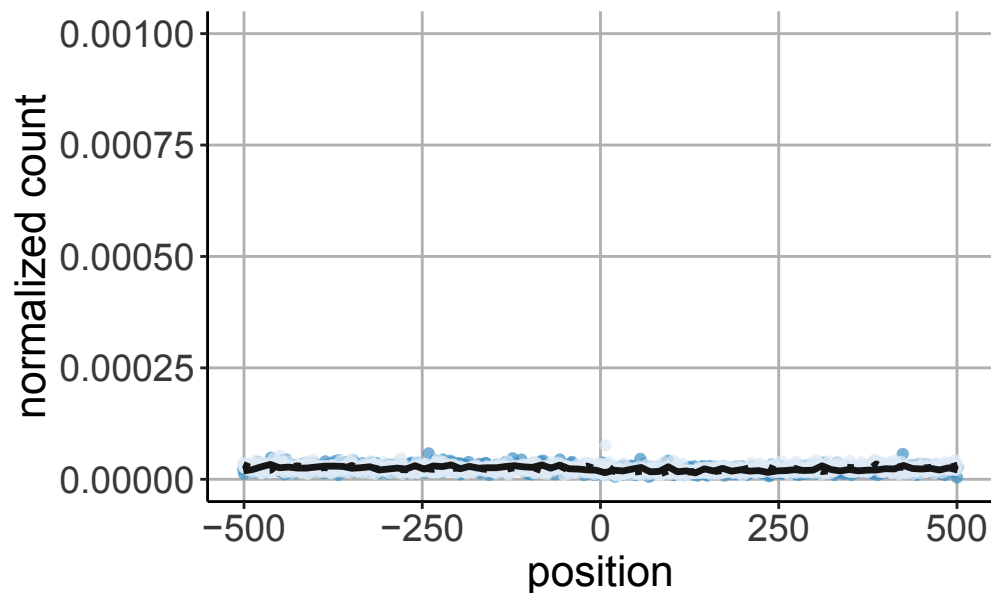

KHDRBS1-UAAUAGN

▪ antisense — sense    • antisense • sense

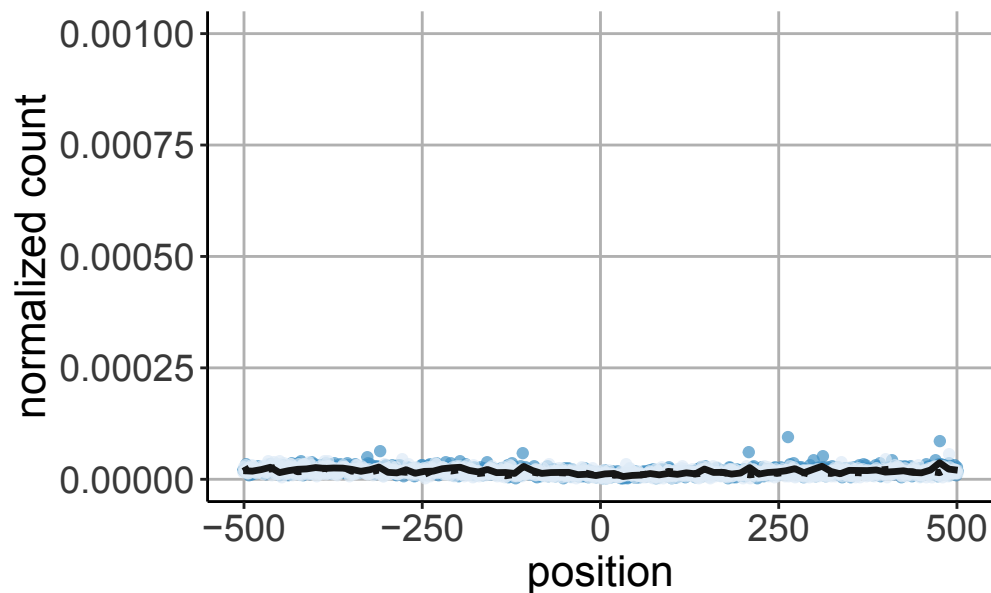

HNRNPCL1-GUUUUUUGGG

▪ antisense — sense    • antisense • sense

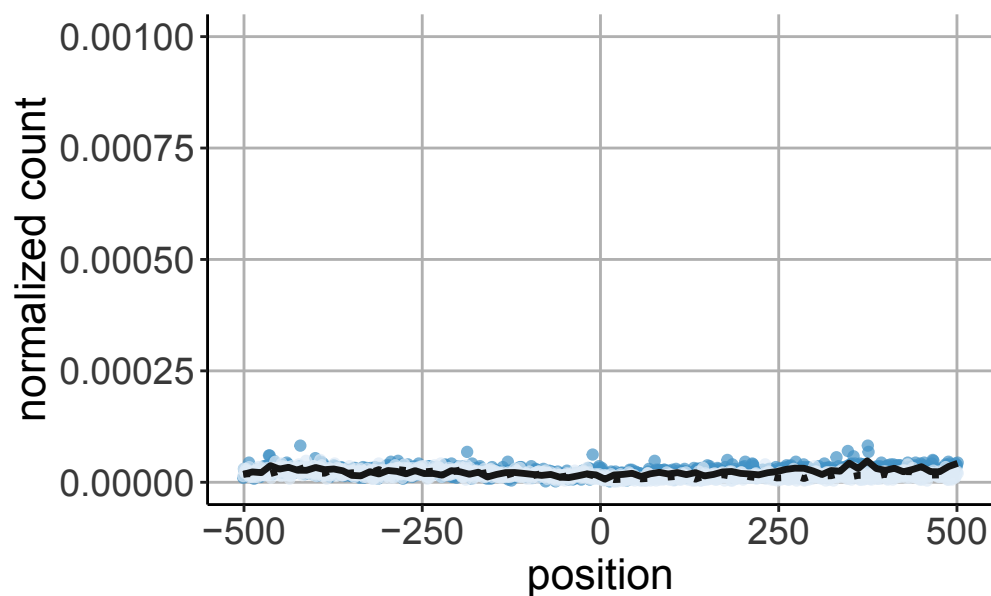

ZFR\_4-GUGACGGAUG

▪ antisense — sense    • antisense • sense

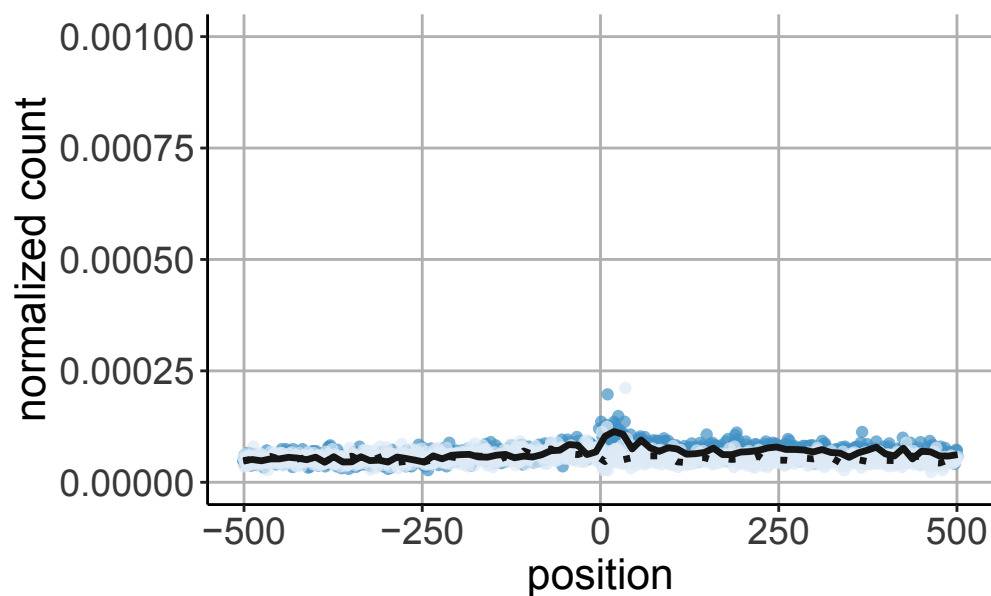

ZFR\_4-GUGC GGAUGN

▪ antisense — sense    • antisense • sense

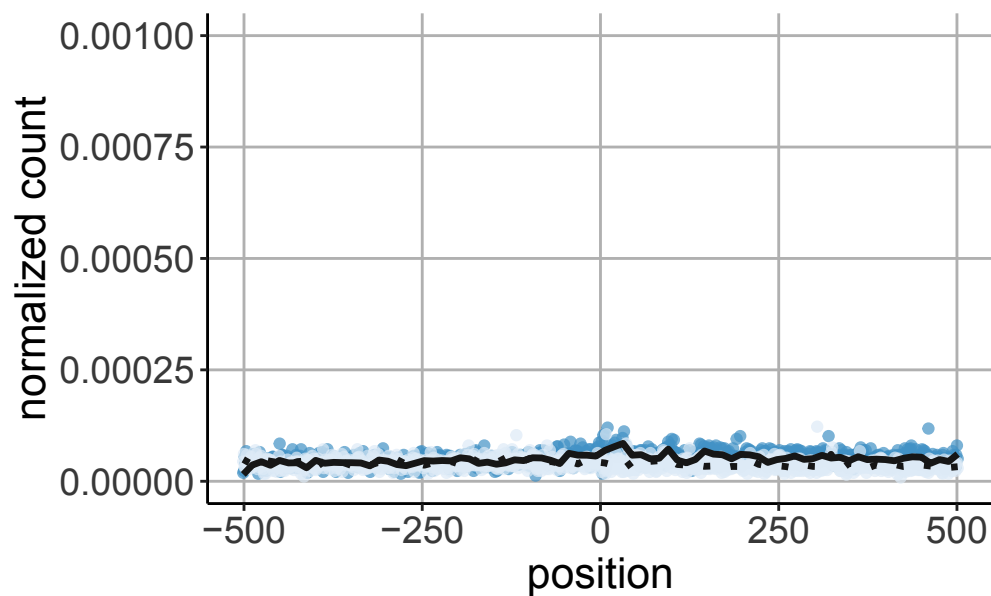

HNRPLL-GCAURCAYCC

▪ antisense — sense    • antisense • sense

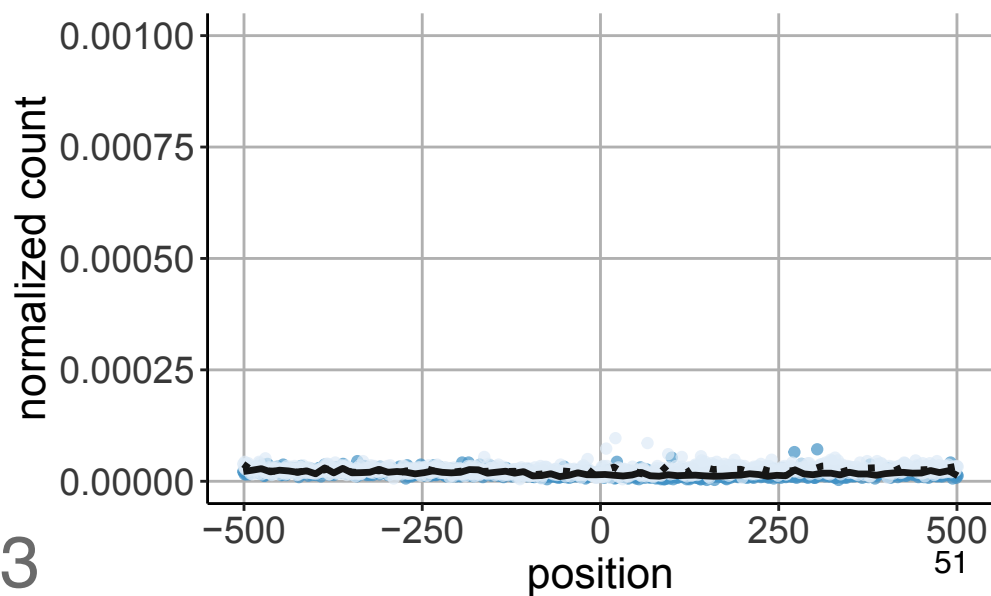

TSS

ZC3H12C-NUGCGNCAGUCGGUAGC

• antisense — sense    • antisense • sense

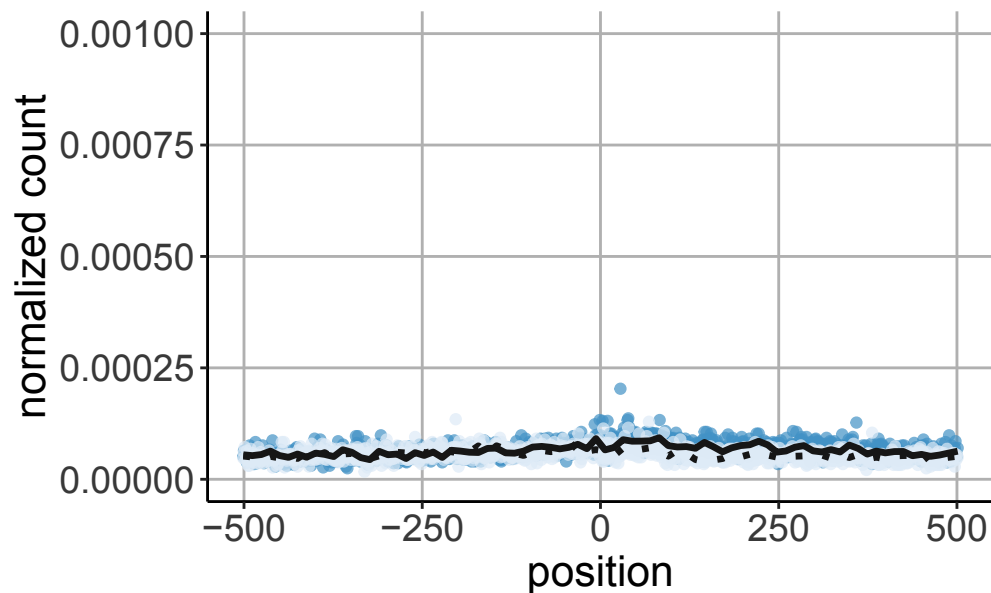

HNRNPL\_2-ACAUWWCAUW

• antisense — sense    • antisense • sense

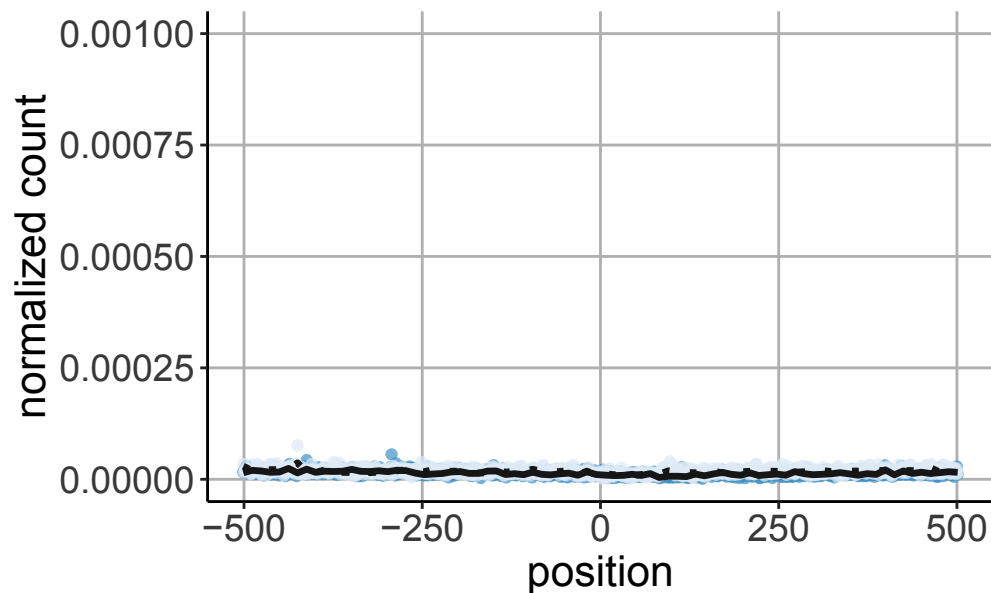

RBMS2-CAGUGAUUGG

• antisense — sense    • antisense • sense

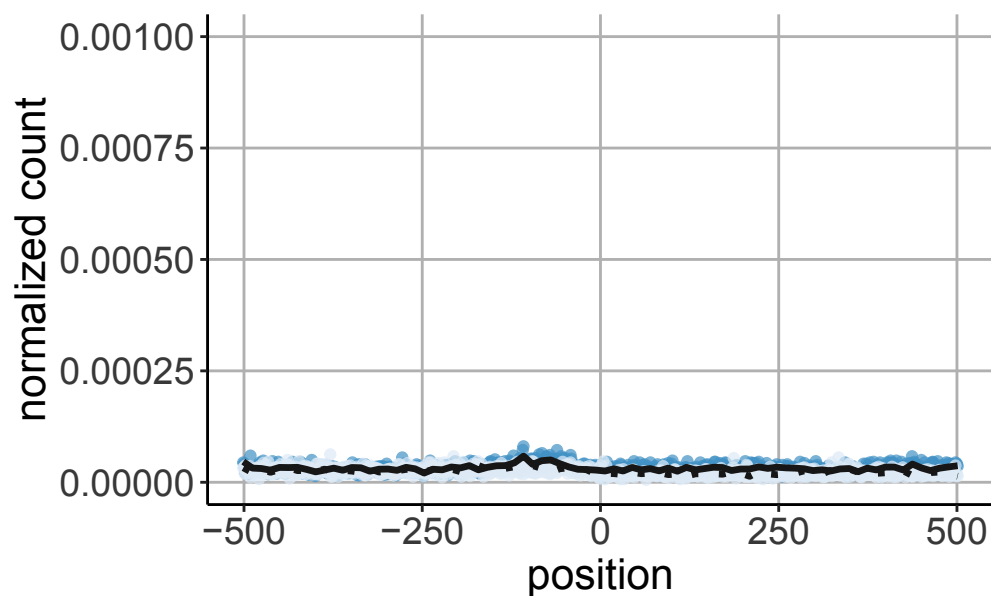

RBM14-GGKUGCGUCG

• antisense — sense    • antisense • sense

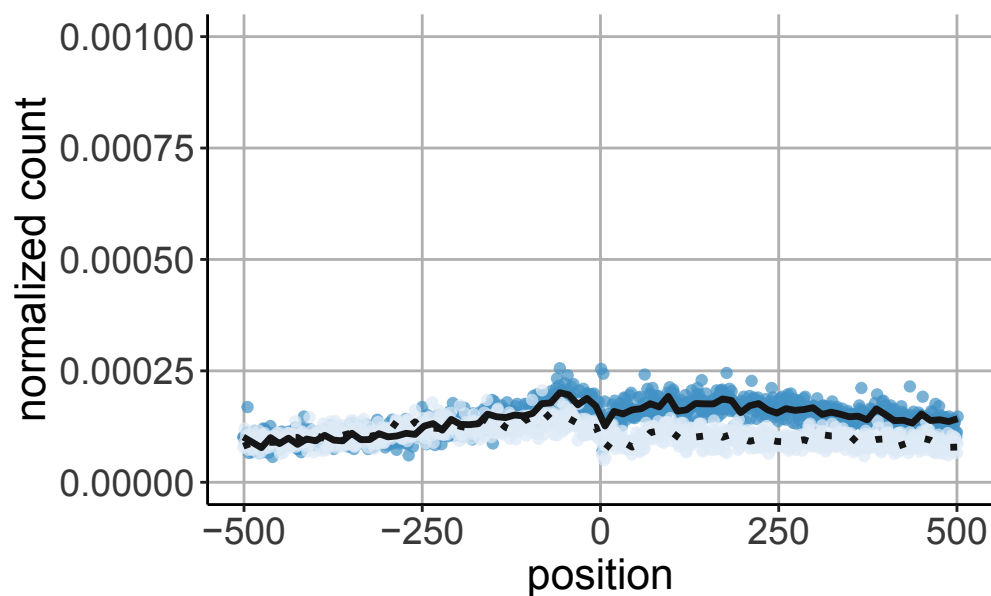

RBMS2-CGUAUAUAG

• antisense — sense    • antisense • sense

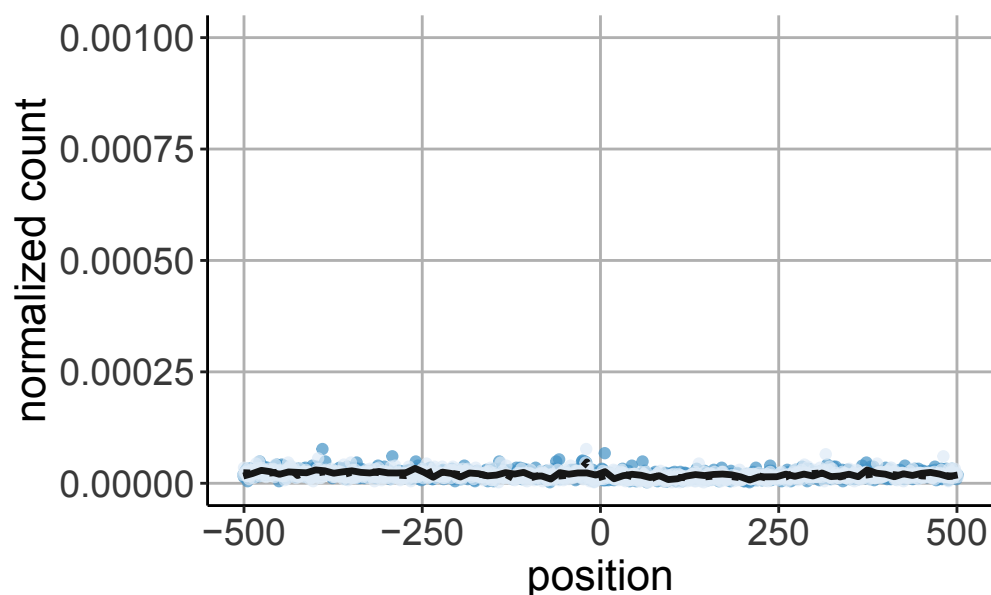

RBMS1-GUAUUUAKNGGG

• antisense — sense    • antisense • sense

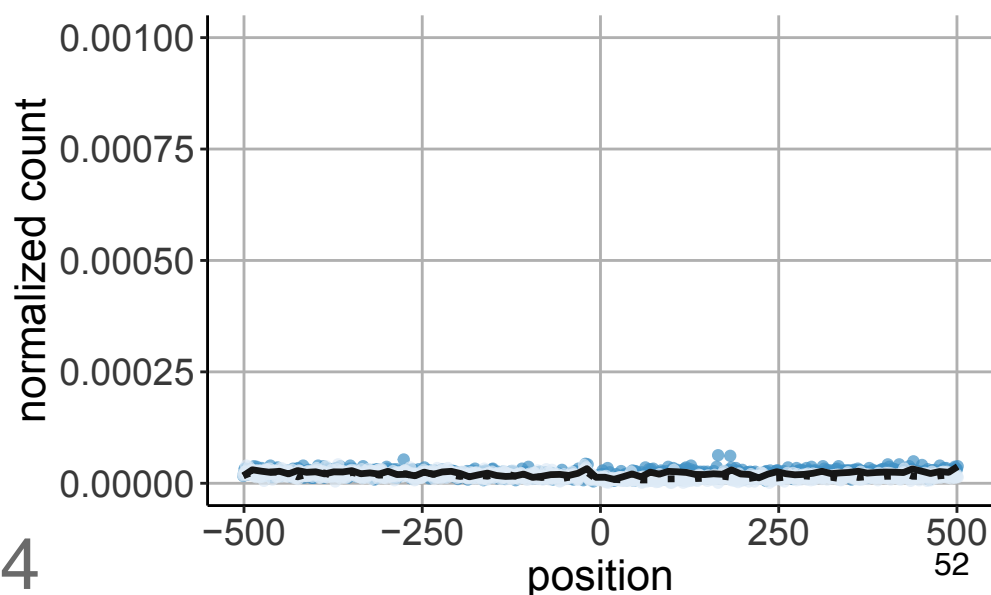

TSS

RBMS1-UUAUAAUCAAC

• antisense — sense • antisense • sense

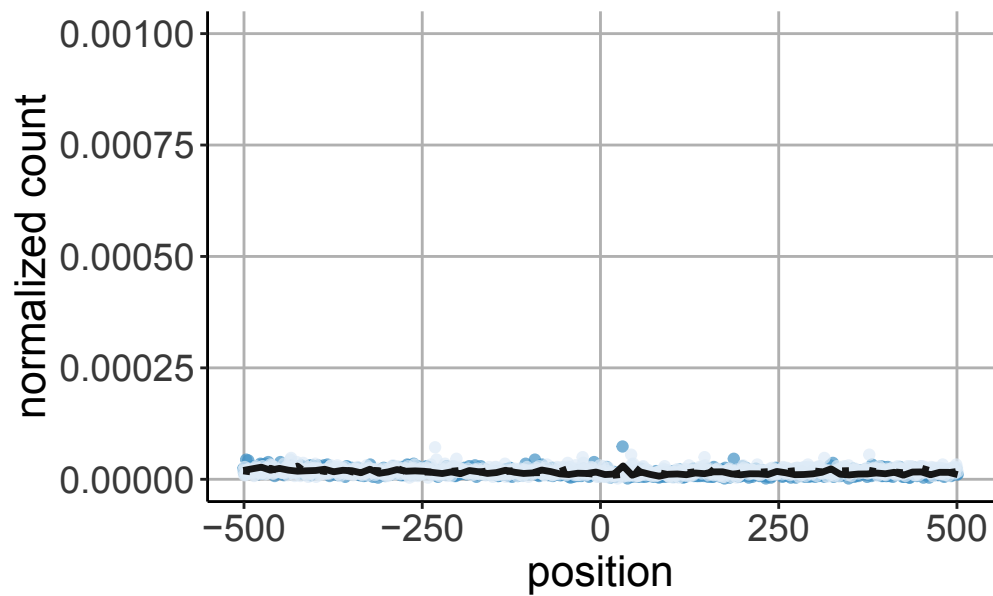

NOVA2\_3-UCAUUCAU

• antisense — sense • antisense • sense

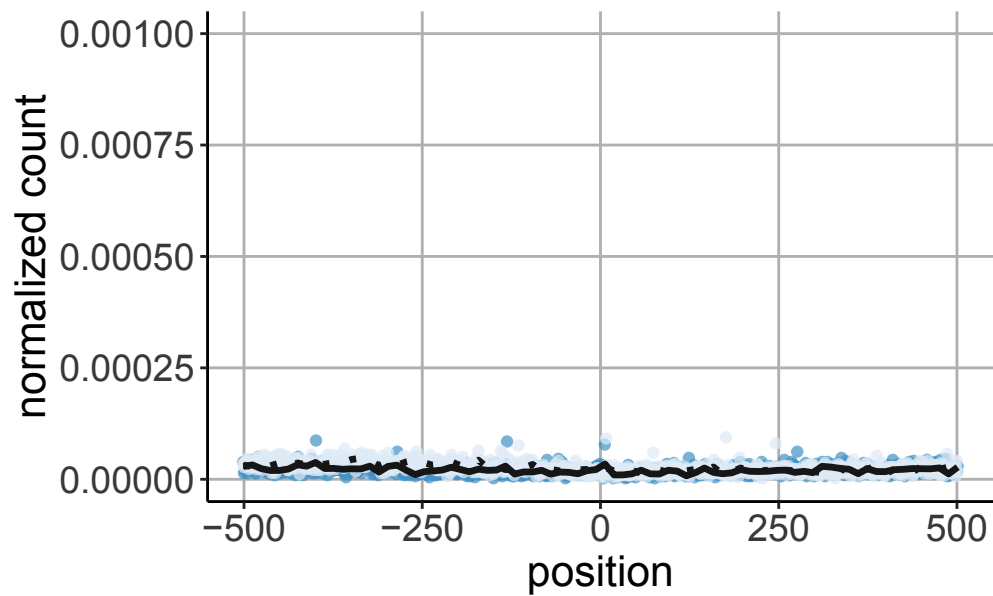

ZFP36-KUAUUUAUGGUGG

• antisense — sense • antisense • sense

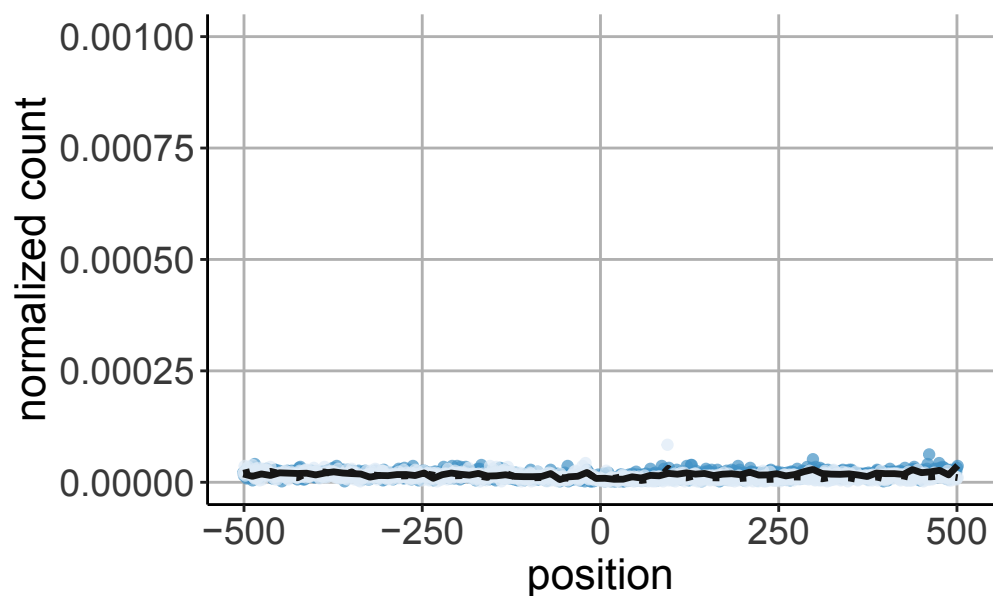

ZFP36-UUAUUUAUU

• antisense — sense • antisense • sense

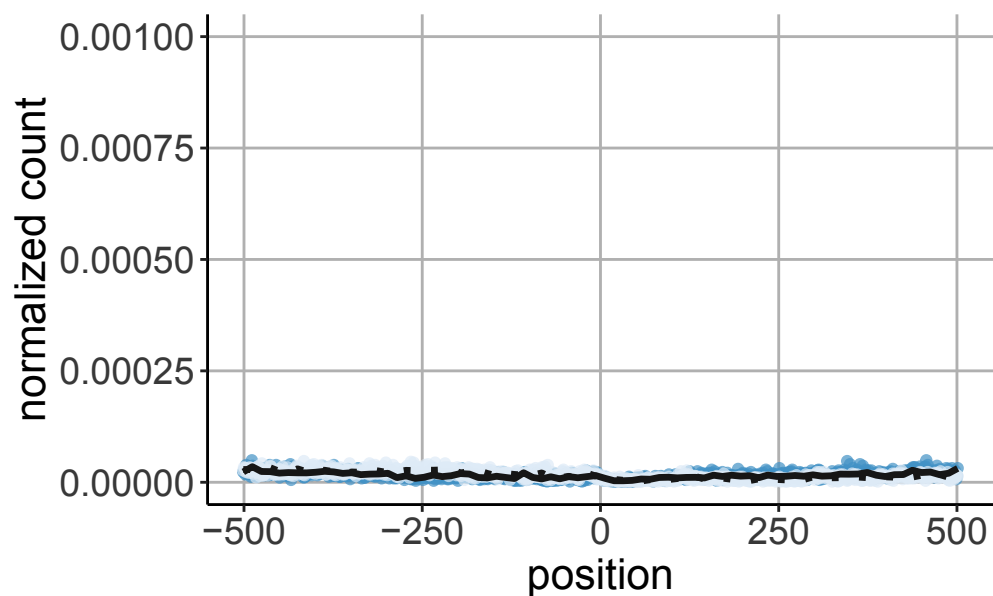

ELAVL4-UUUUAUUUUUG

• antisense — sense • antisense • sense

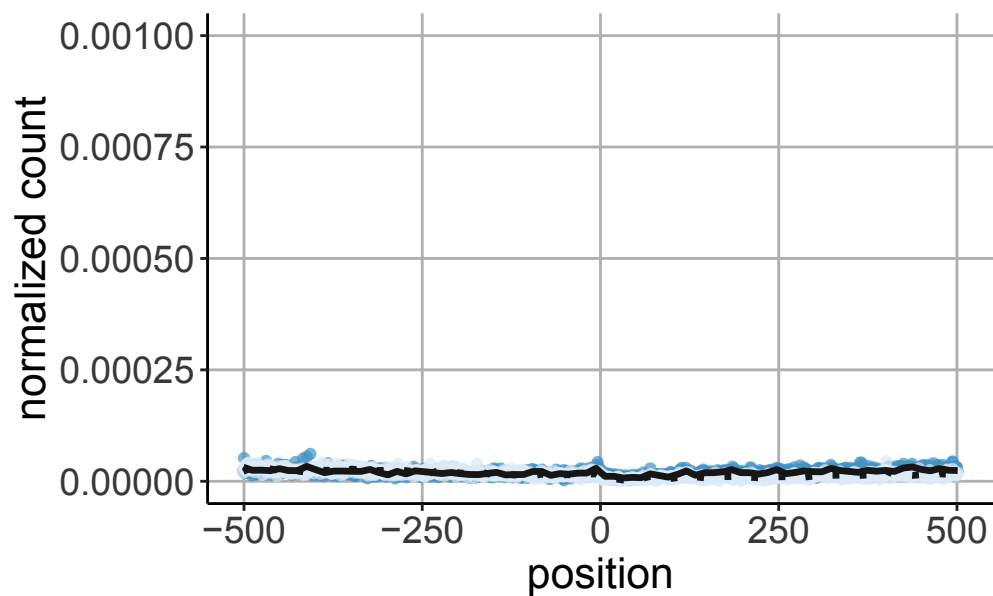

QKI-ACUAACANNACUAACA

• antisense — sense • antisense • sense

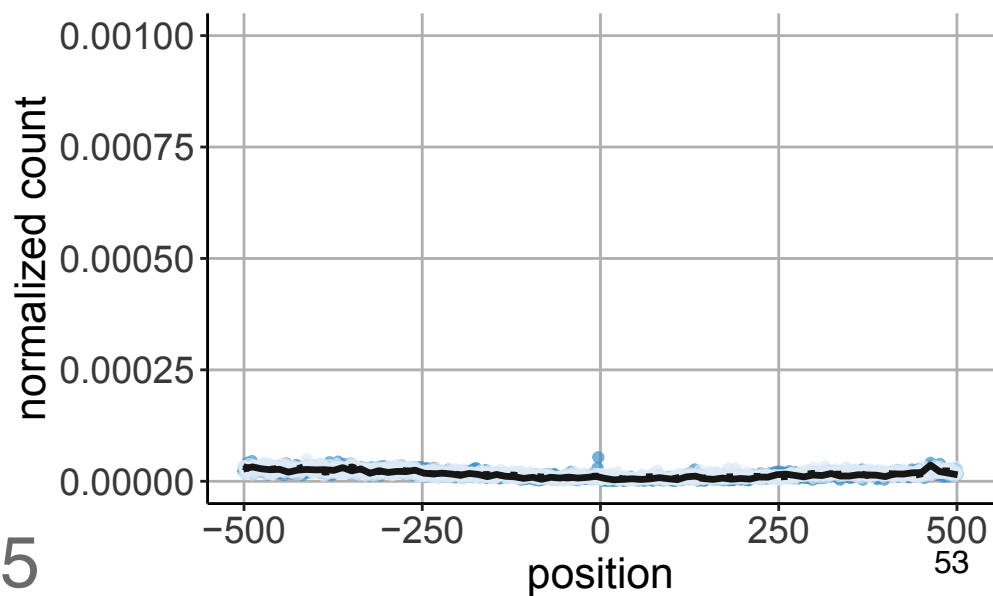

5

53

TSS

TARDBP-GUGUGAAUGG

• antisense — sense    • antisense • sense

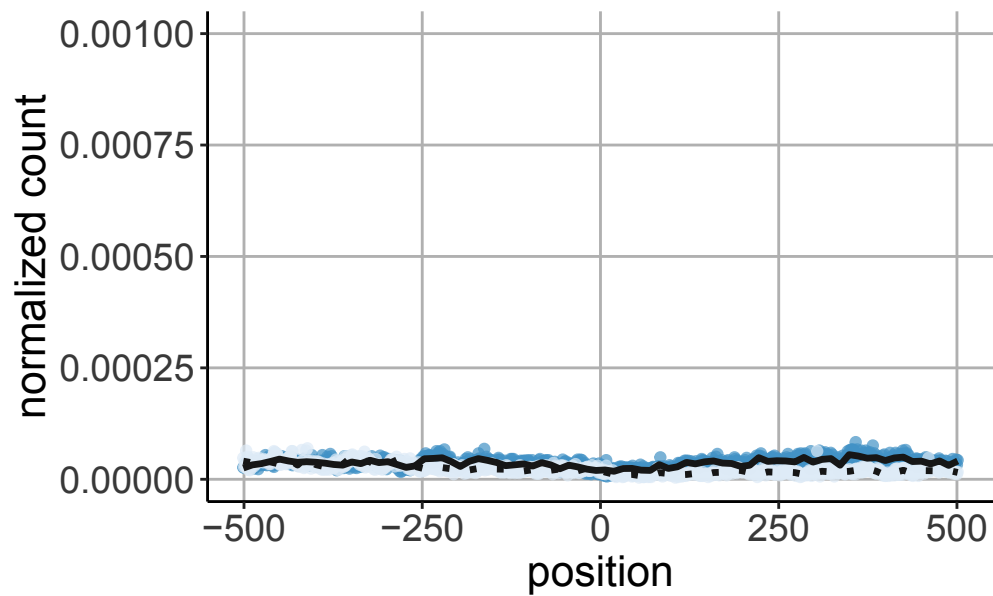

TARDBP-GUGUGNGUGUG

• antisense — sense    • antisense • sense

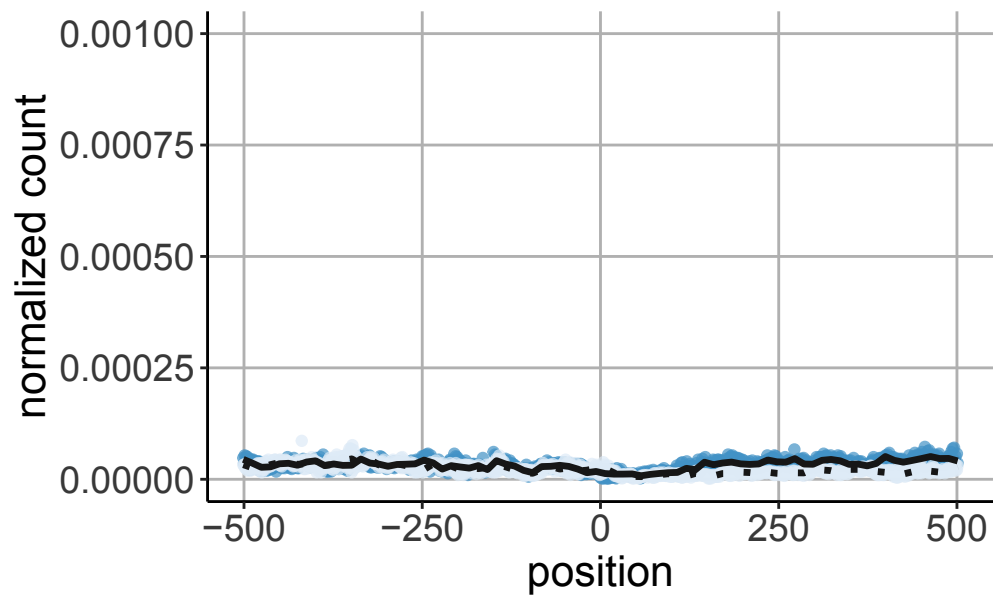

PUM2-NNUGUAYAGK

• antisense — sense    • antisense • sense

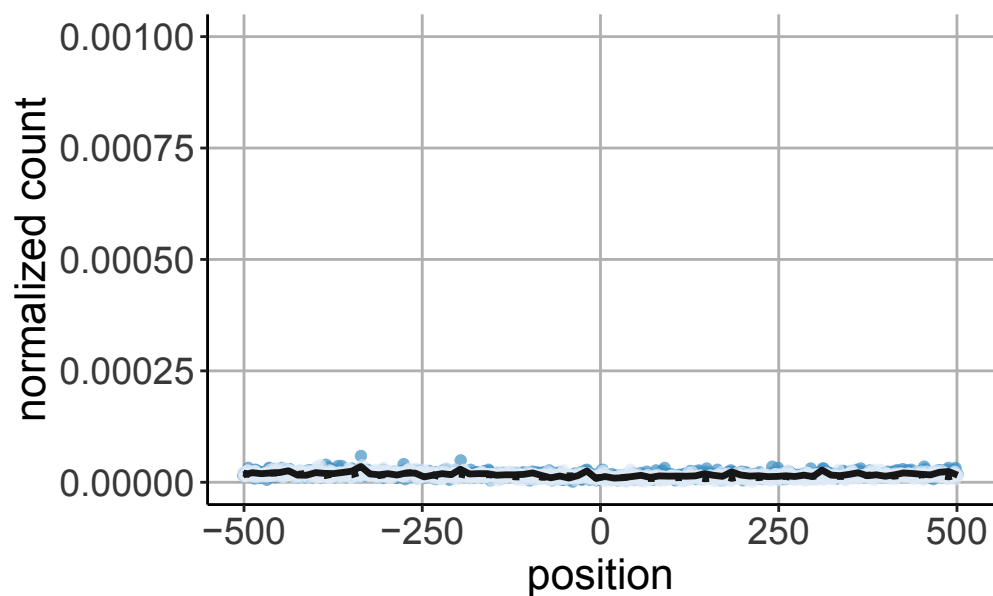

PUM2-NUGUAAAUAGKN

• antisense — sense    • antisense • sense

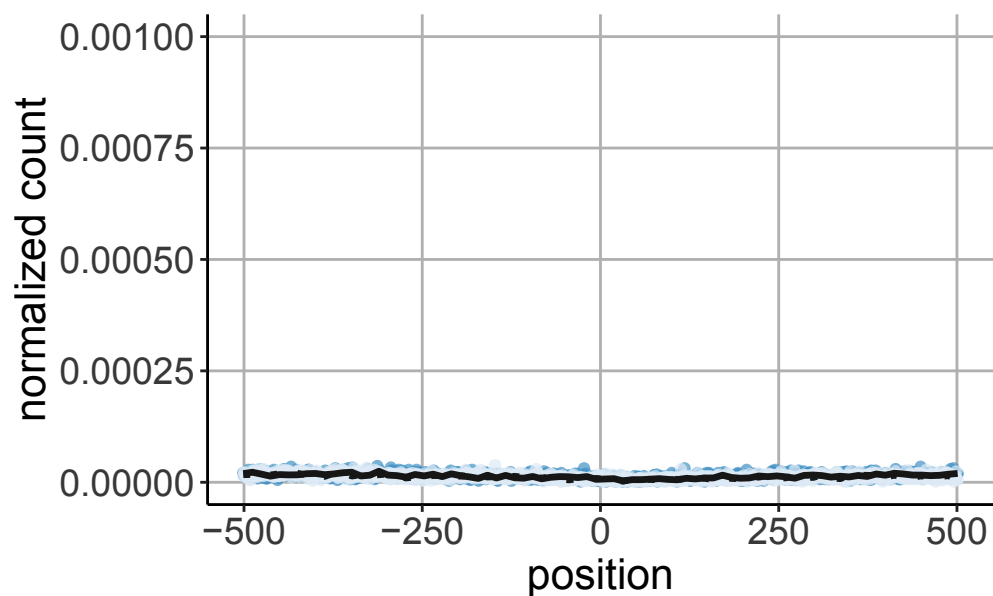

KHDRBS3-UAAANNNNNNNUAAA

• antisense — sense    • antisense • sense

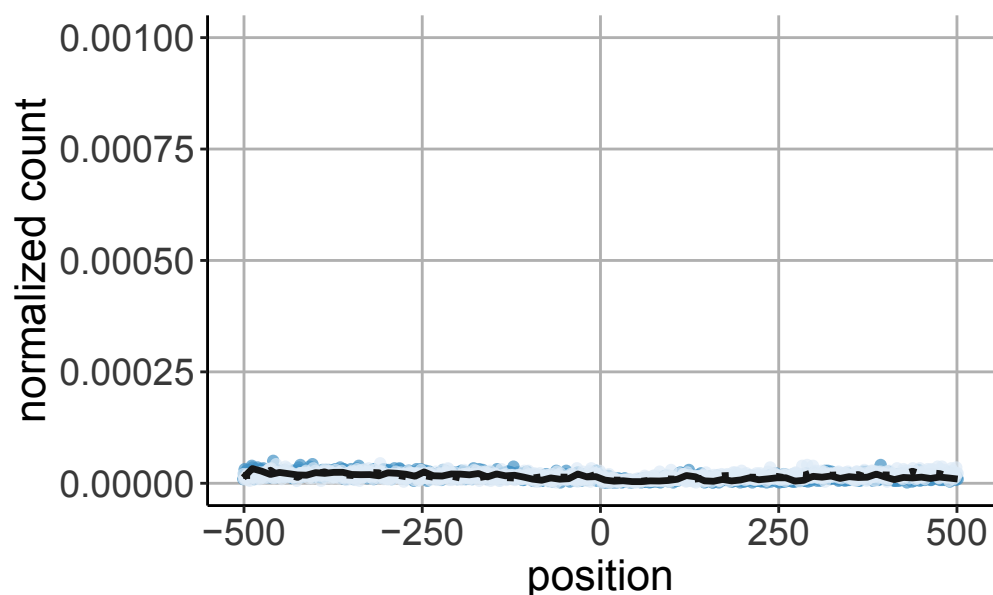

THUMPD1-UUCGUGGCUUG

• antisense — sense    • antisense • sense

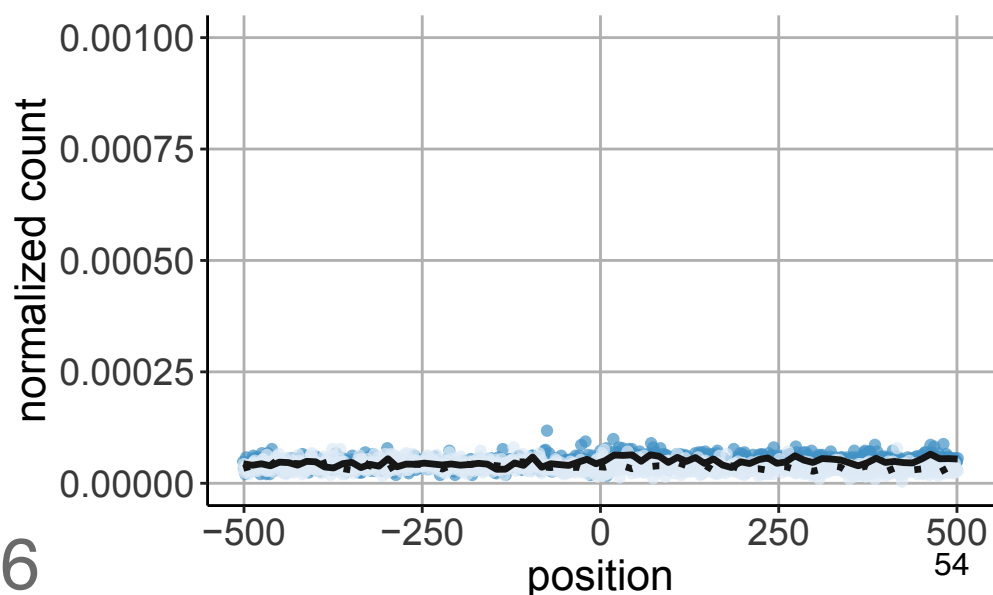

TSS

THUMPD1-WGCGCGGUYUU

• antisense — sense • antisense • sense

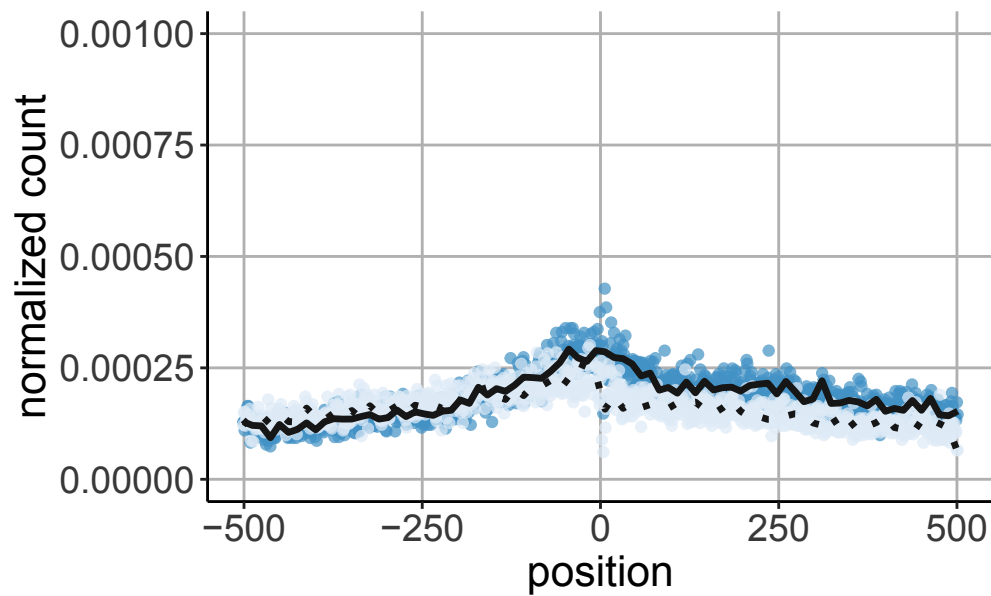

ZFR\_4-GGCACGGAUG

• antisense — sense • antisense • sense

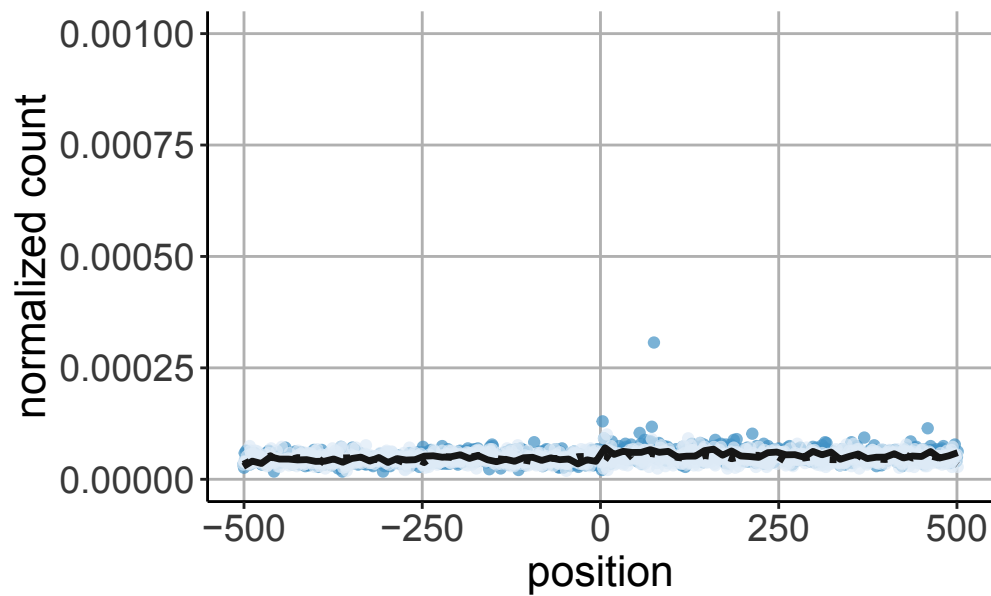

ZFR\_4-UUGCCGGAUGYCGU

• antisense — sense • antisense • sense

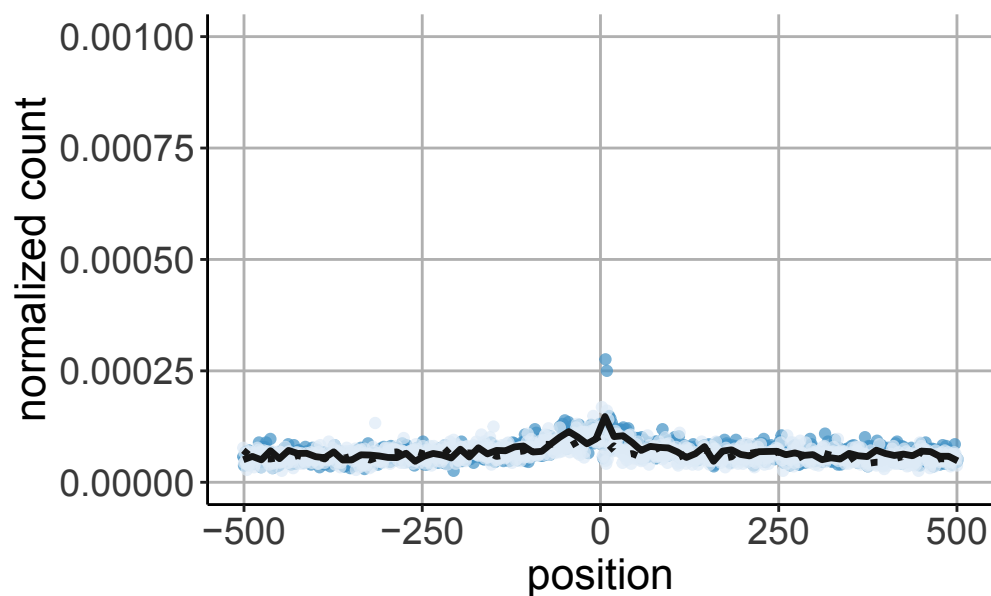

PCBP1-UCCUUNNCCUU

• antisense — sense • antisense • sense

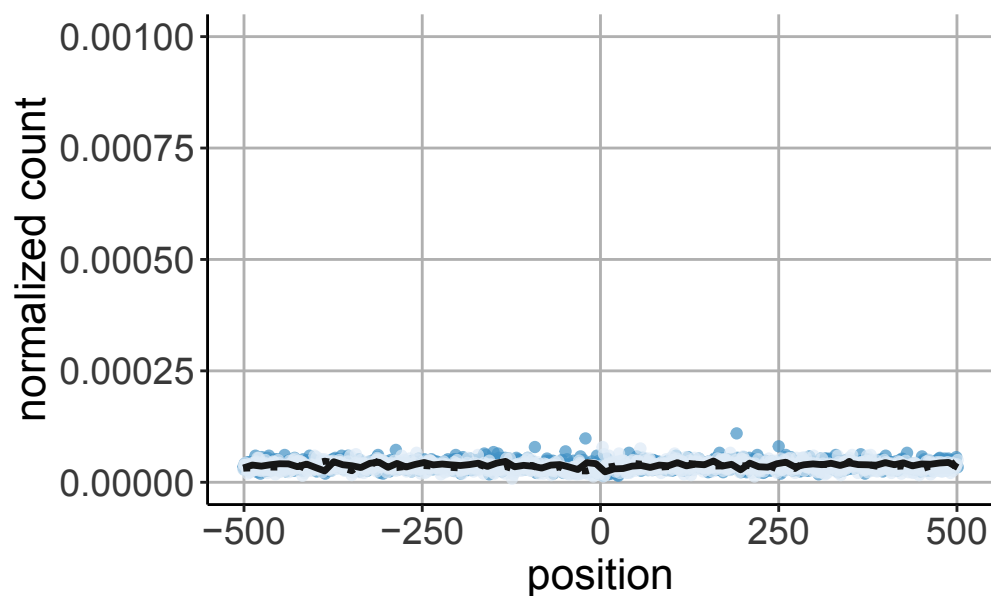

HNRNPA3-UAGGUAAGGG

• antisense — sense • antisense • sense

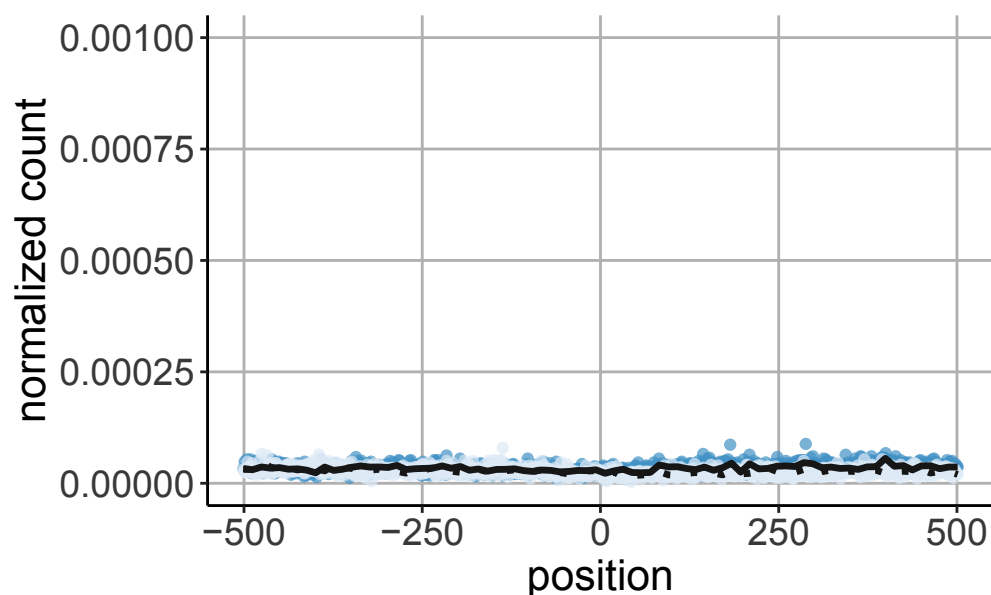

RBM38-KKGUGUGUGUGUKK

• antisense — sense • antisense • sense

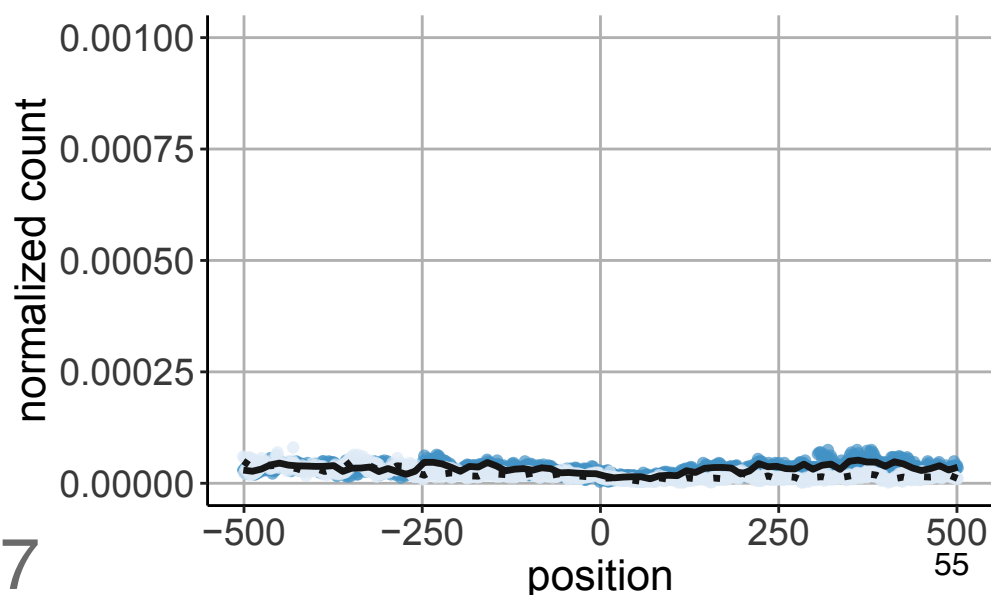



TSS

MEX3D-UNURUUUAUU

RBPM2-CACAGNGCACA

• antisense — sense • antisense • sense

• antisense — sense • antisense • sense

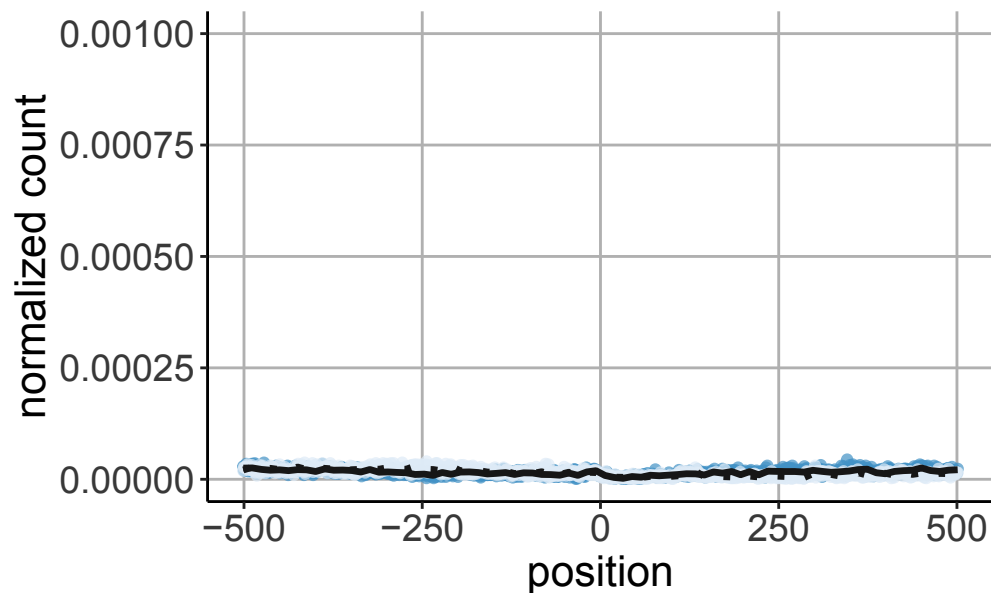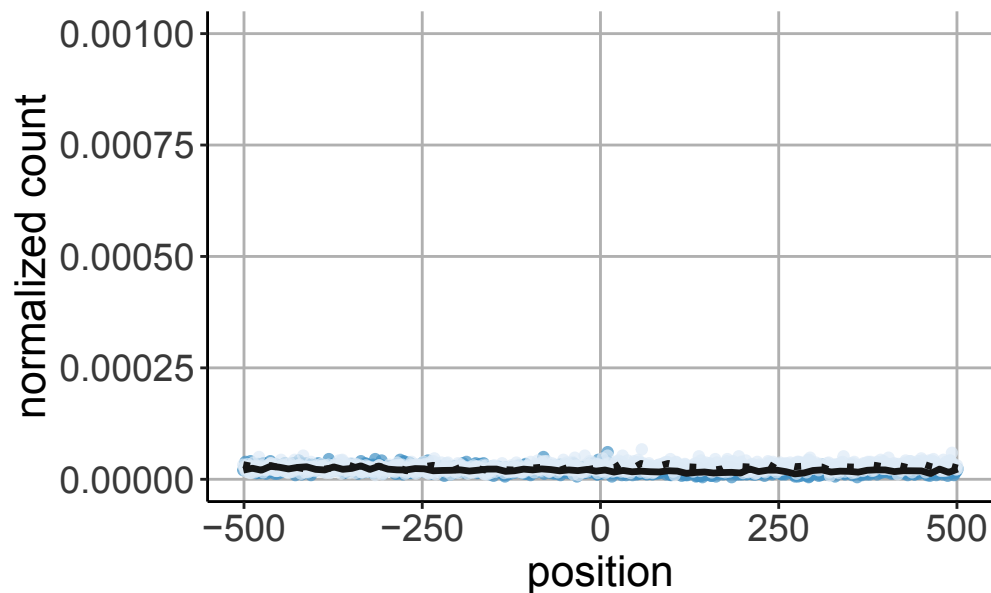

RBPM2-UCACRUGCACA

RBPM2-UGCACA

• antisense — sense • antisense • sense

• antisense — sense • antisense • sense

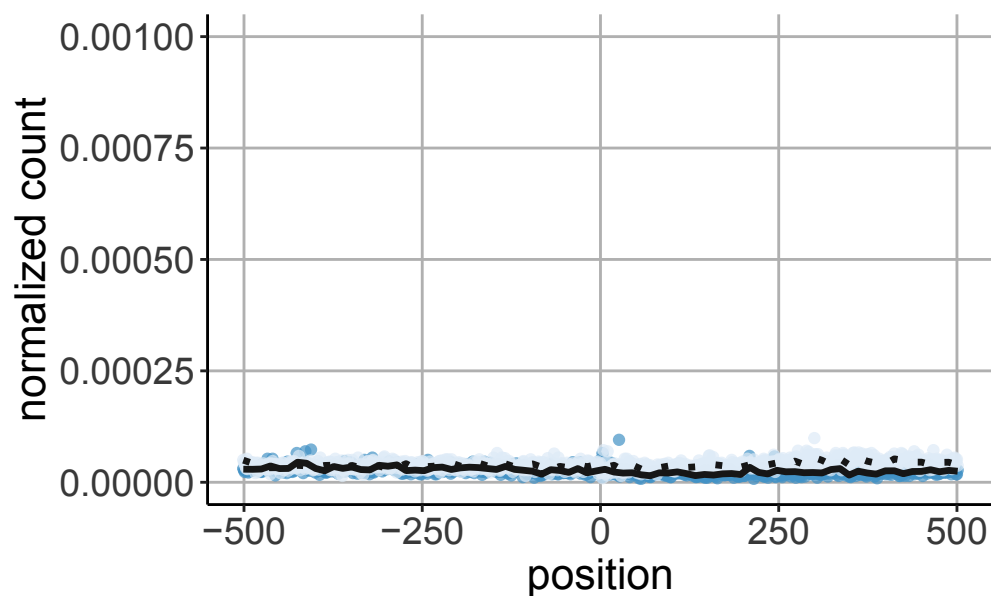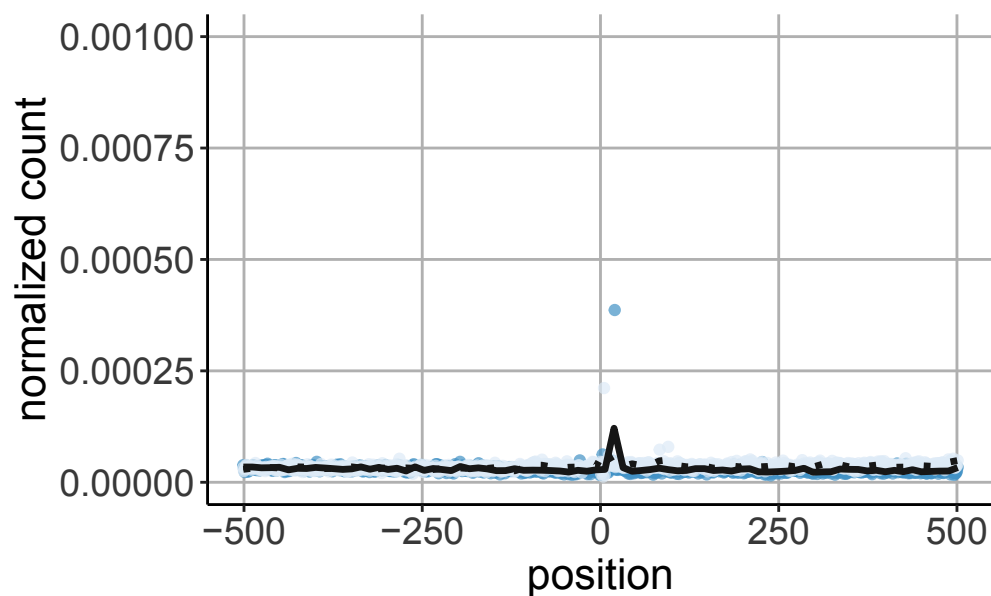

YBX2-GCCAUNNNAUCGC

YBX2-NUAACAUCNN

• antisense — sense • antisense • sense

• antisense — sense • antisense • sense

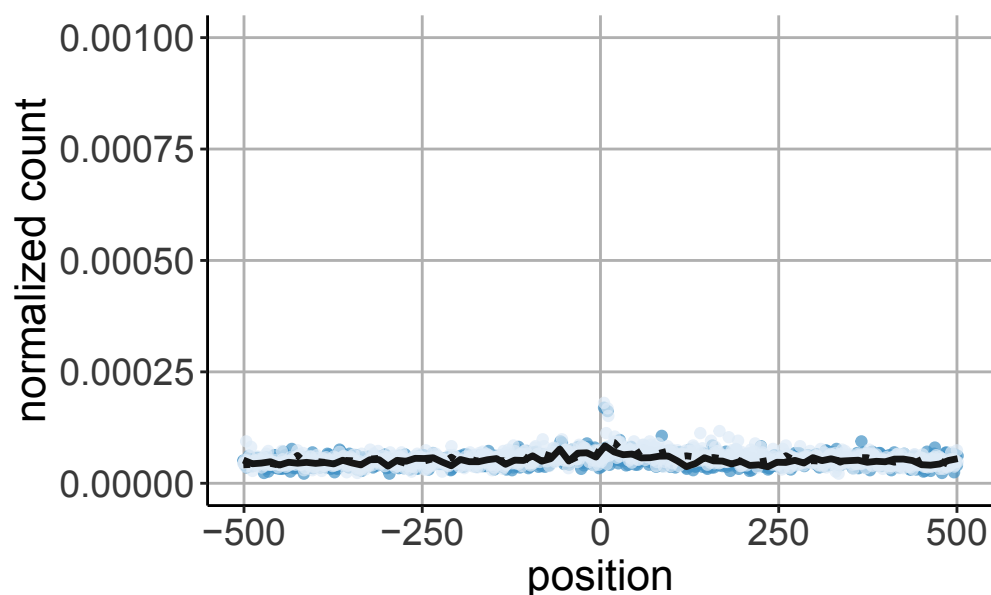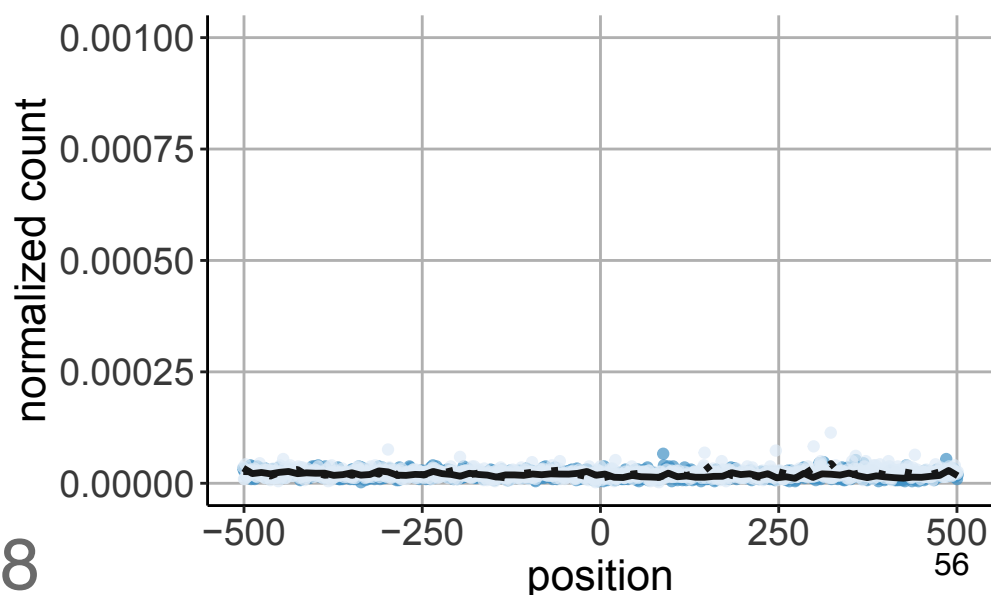

TSS

CSTF2T-CGUAGCGUCU

• antisense — sense • antisense • sense

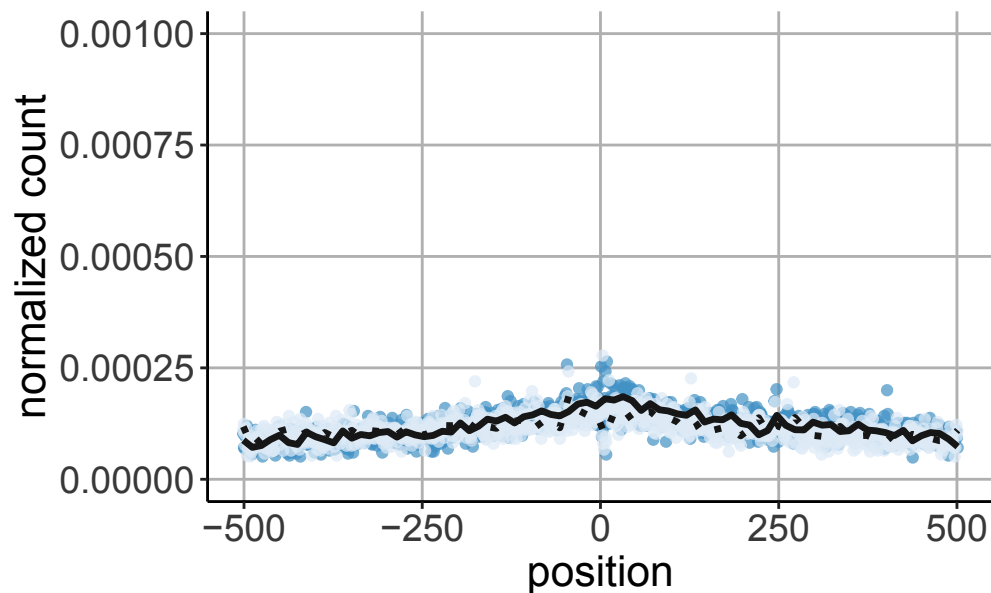

SNRNP70-GNUCANGNG

• antisense — sense • antisense • sense

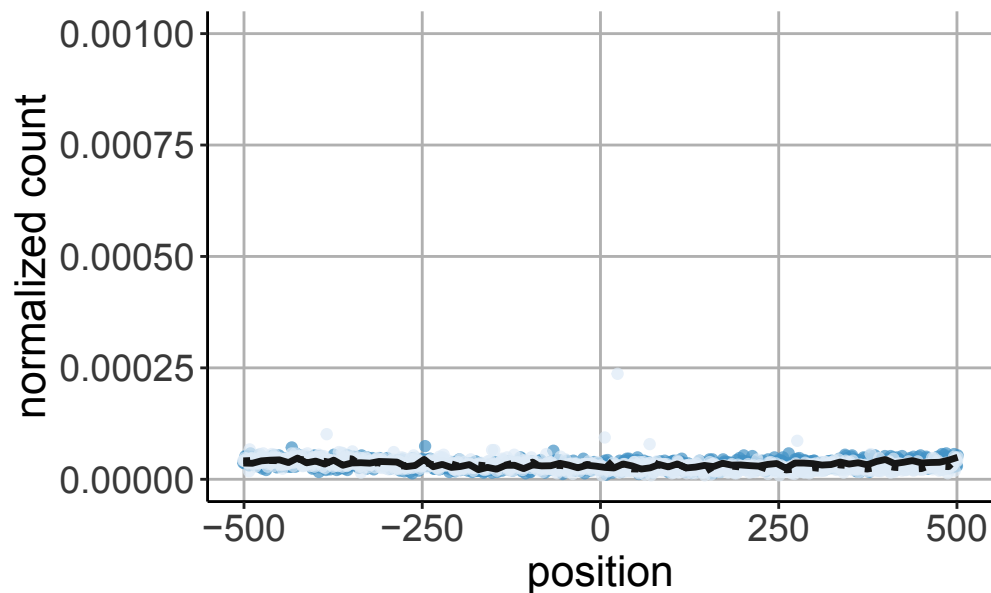

SNRNP70-GUUCAAGGUG

• antisense — sense • antisense • sense

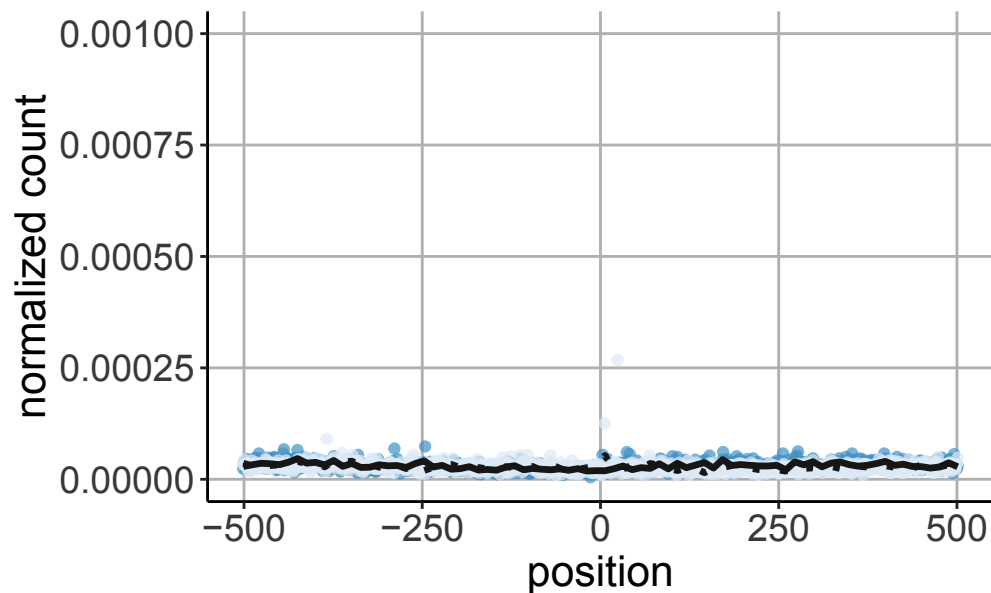

DAZ4-GYUCUAGUUAGYAUC

• antisense — sense • antisense • sense

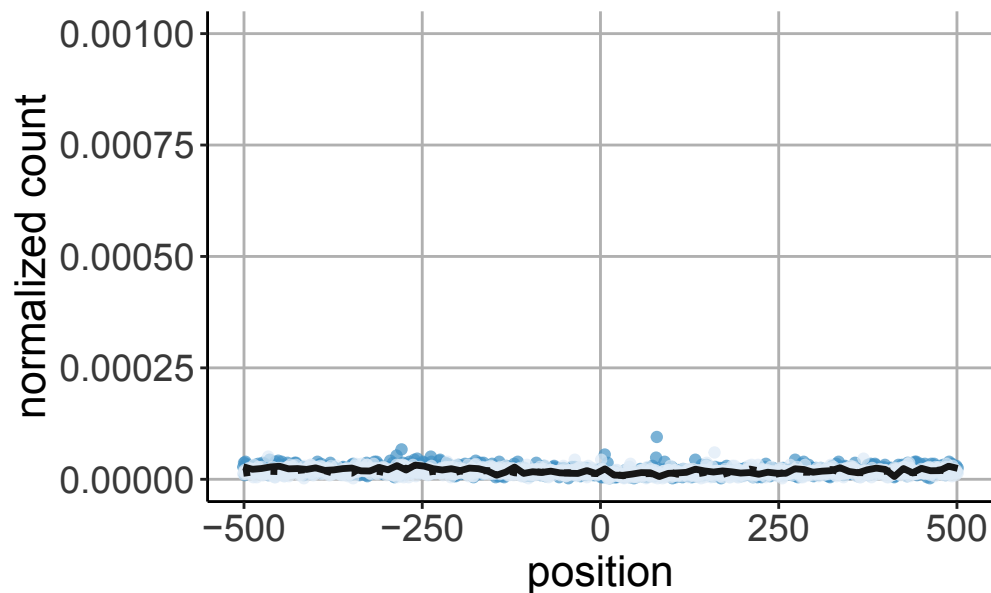

IGF2BP1-CAGNUWCA

• antisense — sense • antisense • sense

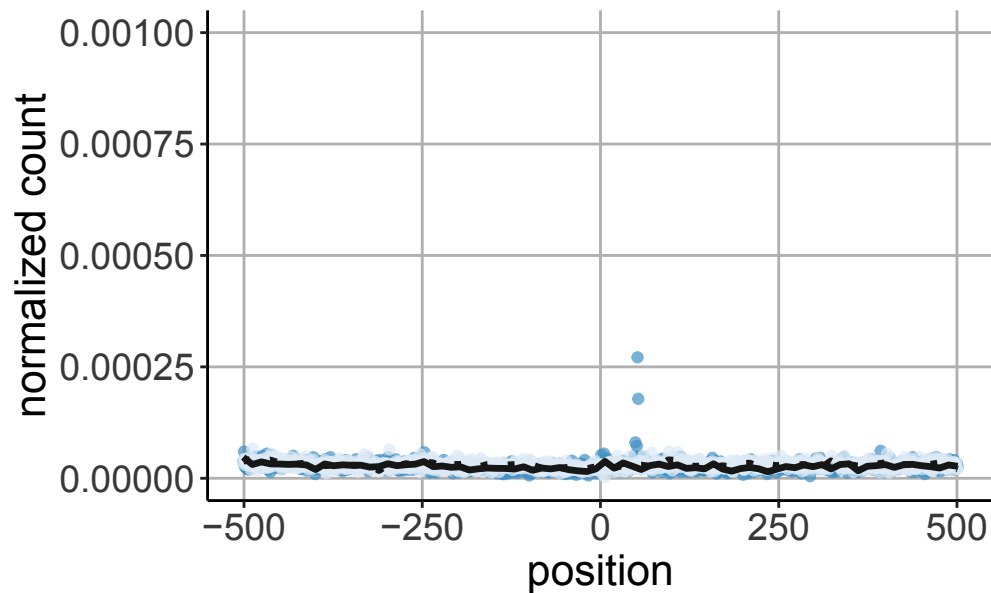

HEXIM2-NGCGACGGKN

• antisense — sense • antisense • sense

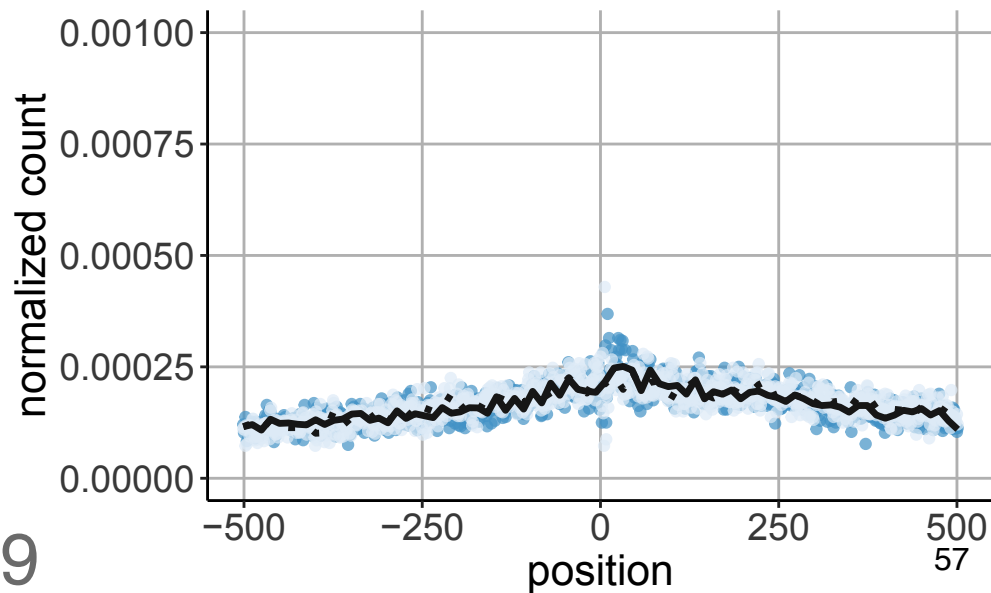

TSS

YBX1-NUAACAUCGGG

• antisense — sense • antisense • sense

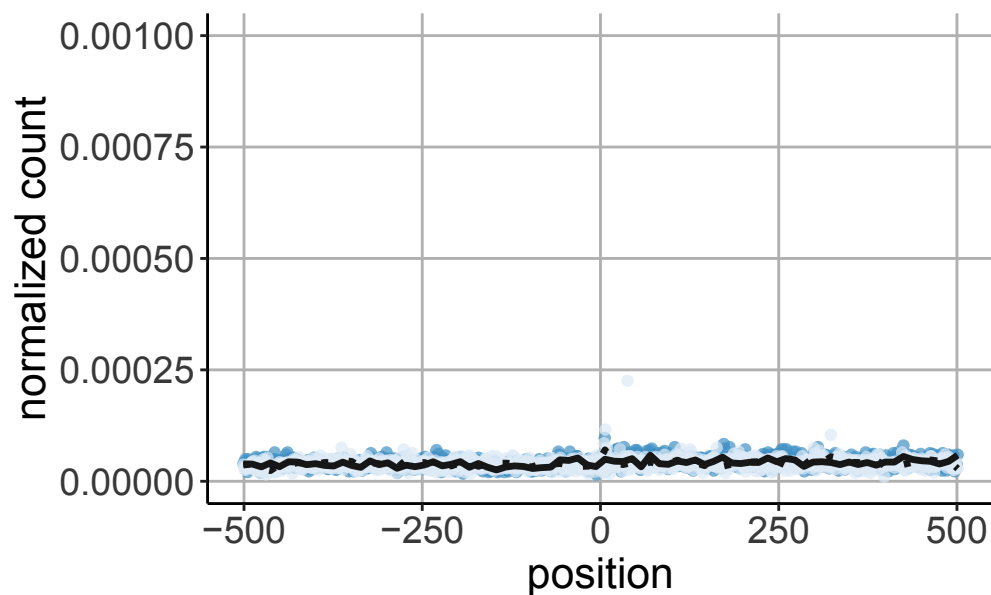

RBM24-GUGUGNGUGUG

• antisense — sense • antisense • sense

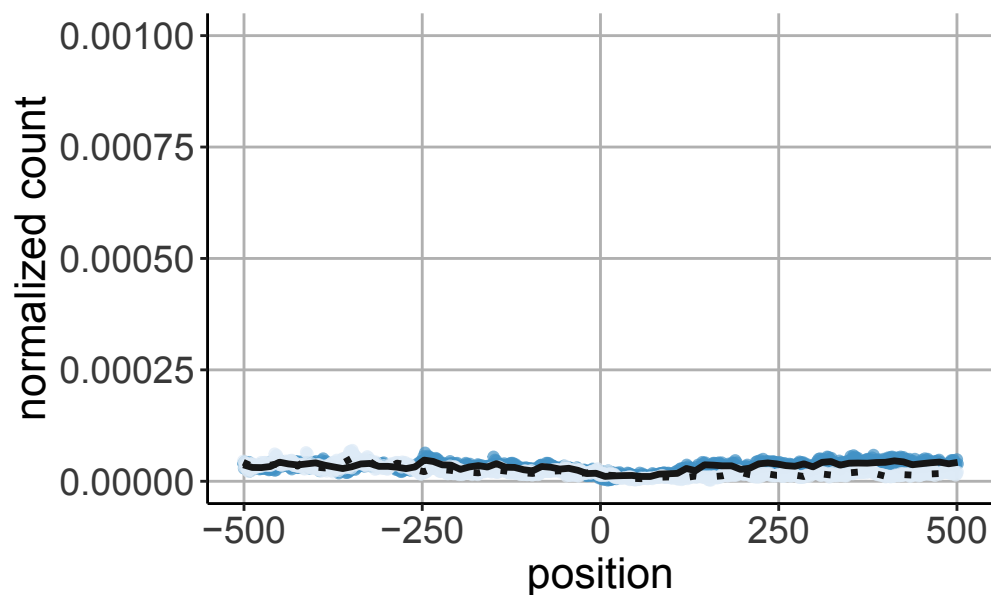

CSDA-UAACAUCA

• antisense — sense • antisense • sense

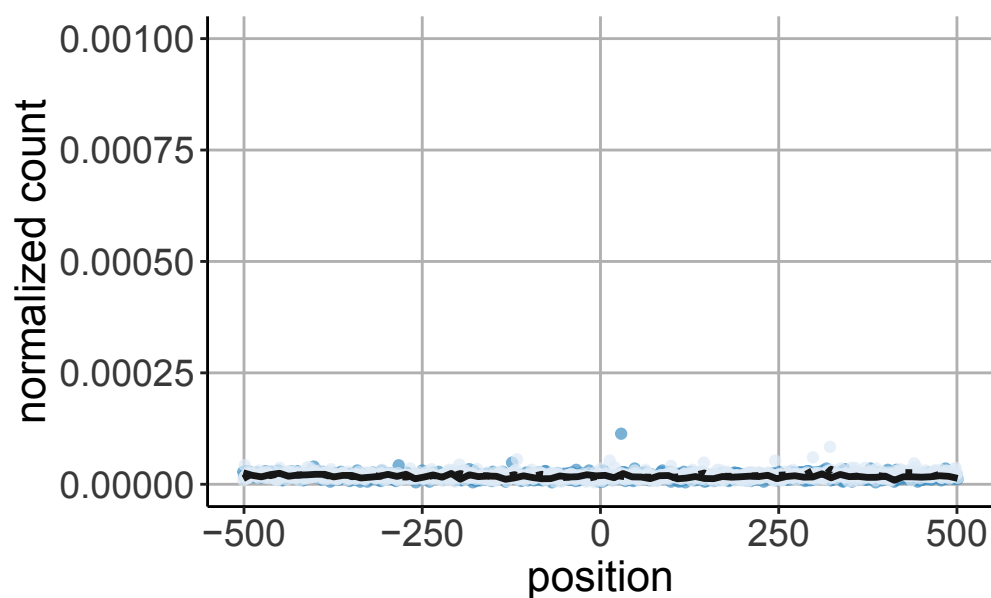

HNRNPA1L2-NUAGGUUAGGGW

• antisense — sense • antisense • sense

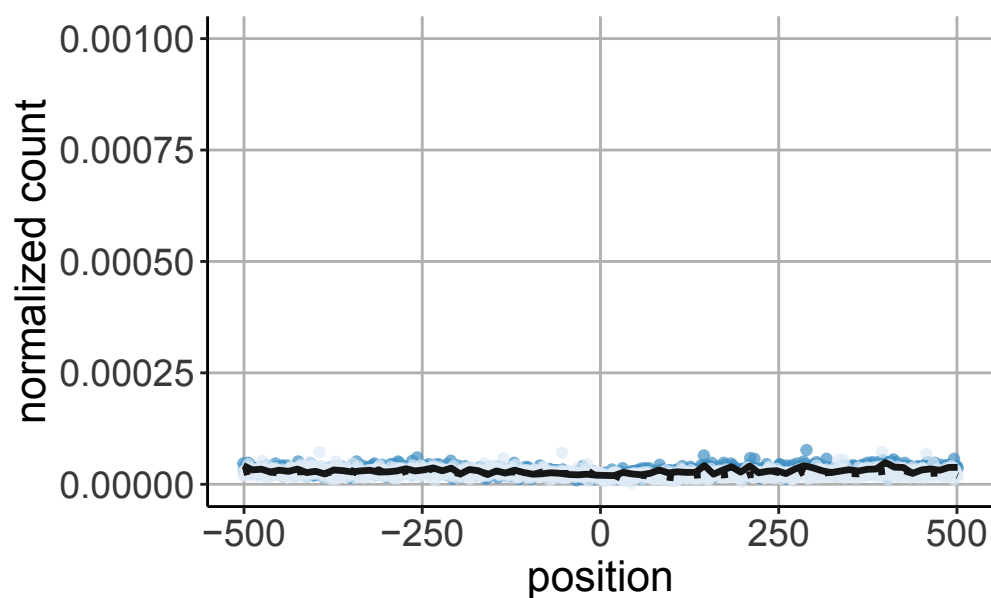

ZC3H12B-NGCGNCAGUCGGUAGCN

• antisense — sense • antisense • sense

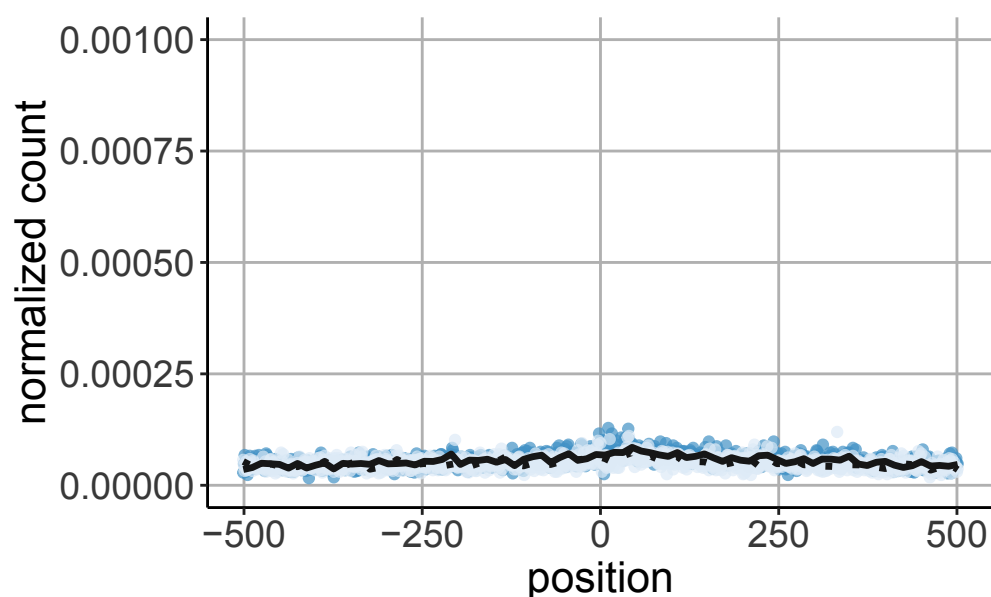

ZC3H12A-NUUGCCAWAGUKU

• antisense — sense • antisense • sense

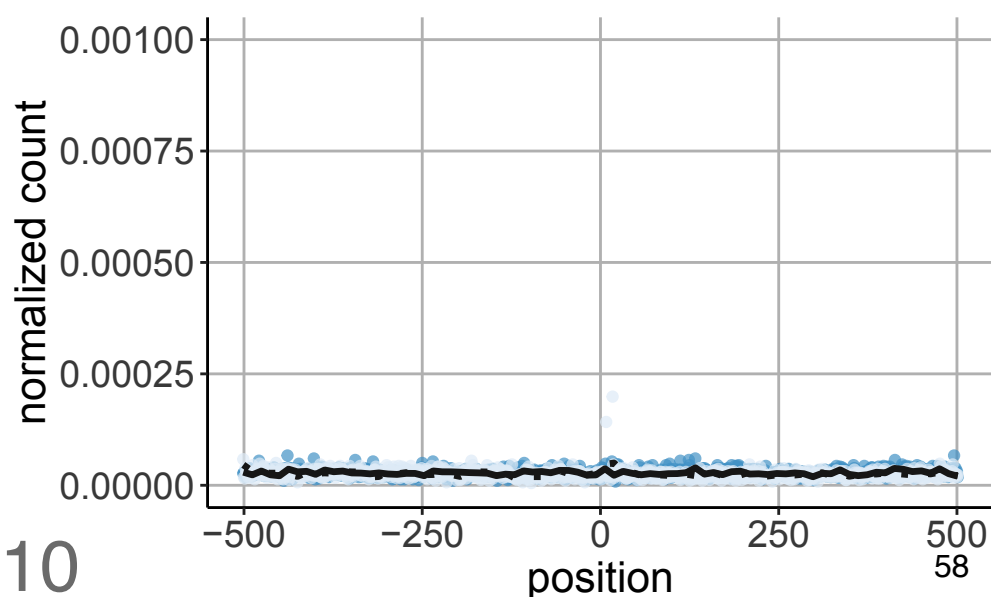

TSS

DAZAP1-UUAGGUUAGG

• antisense — sense • antisense • sense

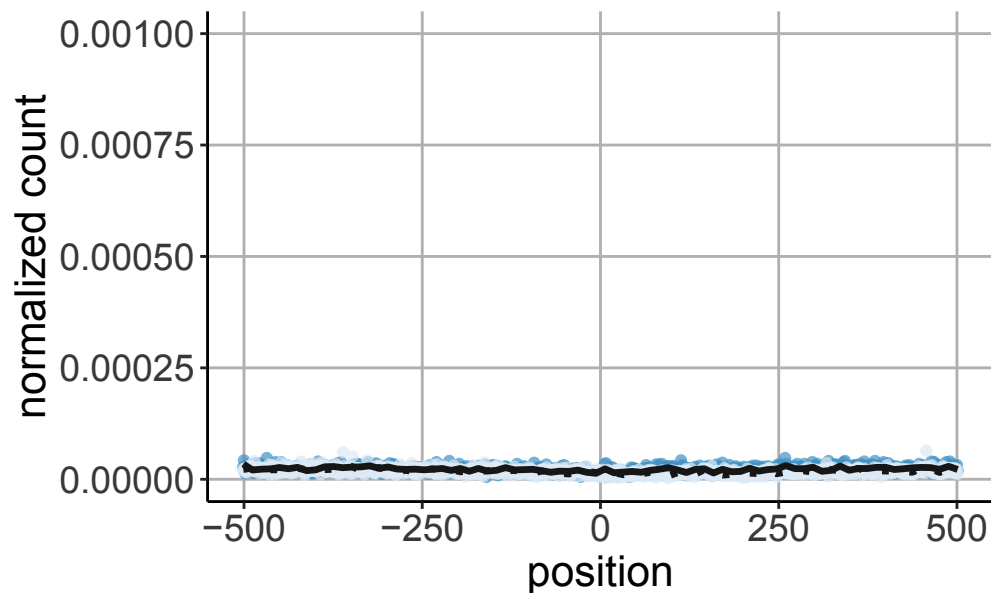

CARHSP1-GCCAUGAUGAU

• antisense — sense • antisense • sense

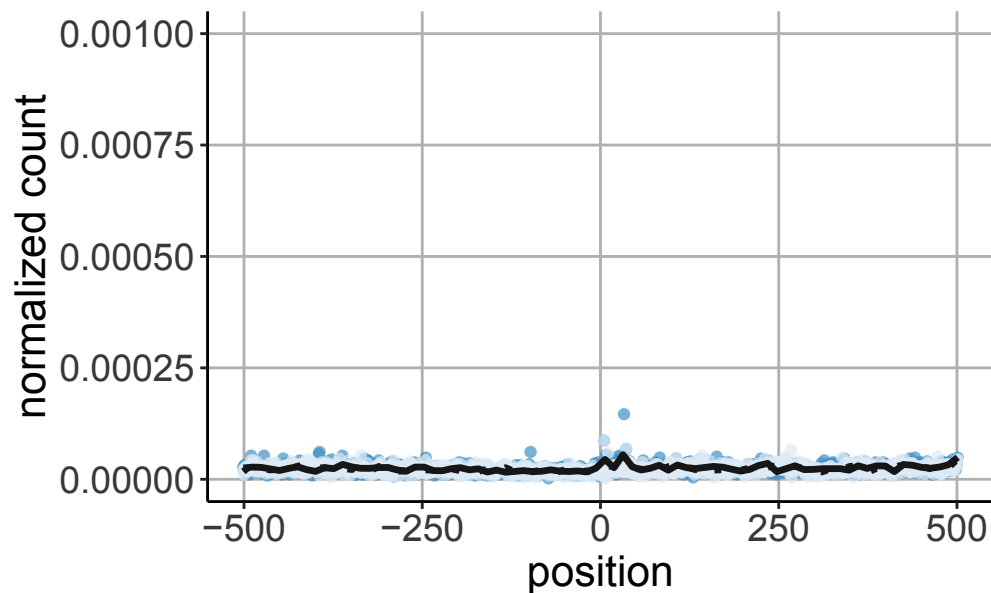

CARHSP1-UUGCCUUGUCCCGAU

• antisense — sense • antisense • sense

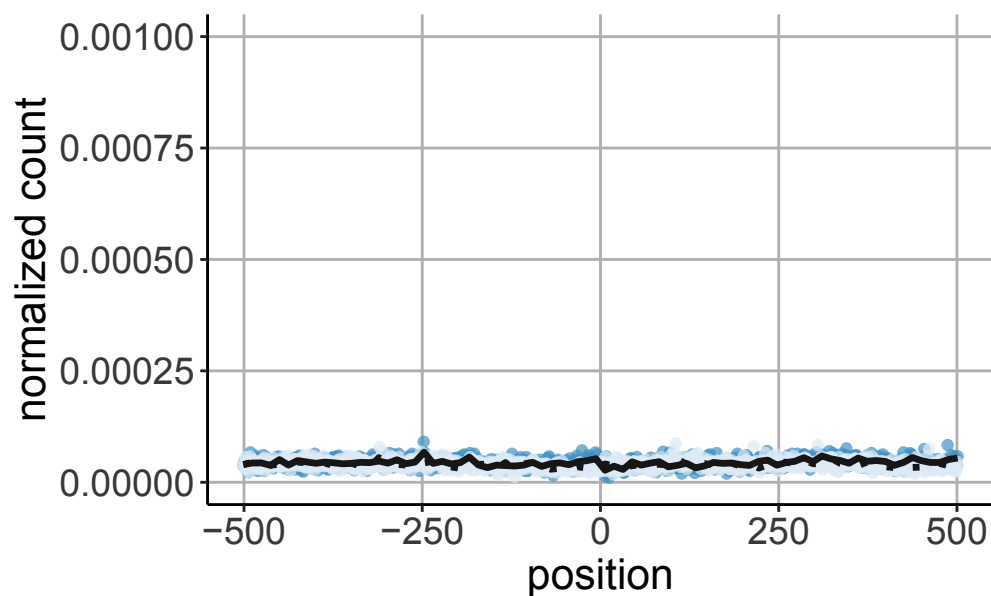

RNPC3-GGGUSUACGGGGU

• antisense — sense • antisense • sense

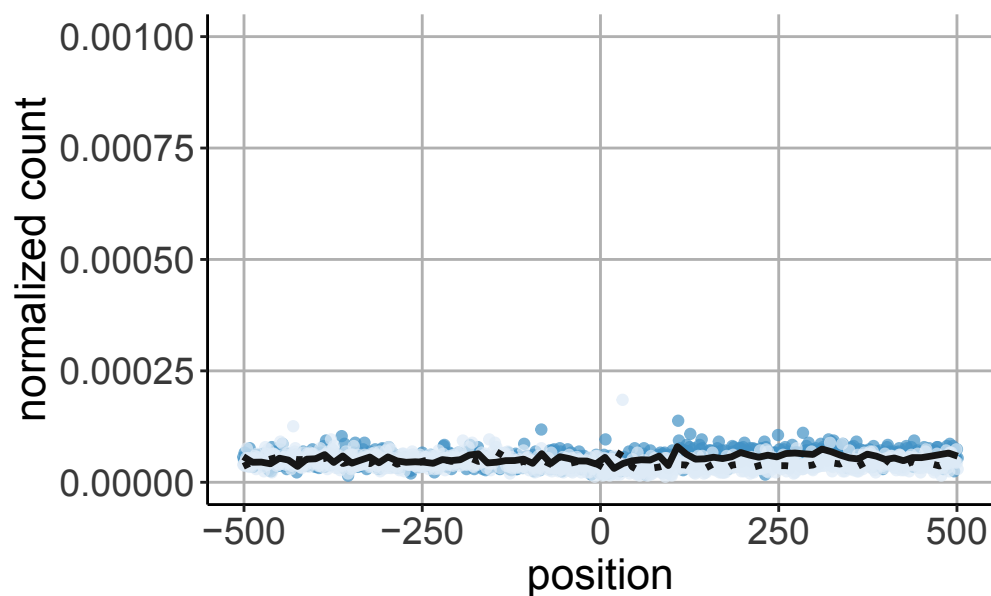

ELAVL1-UUUAUGNUUU

• antisense — sense • antisense • sense

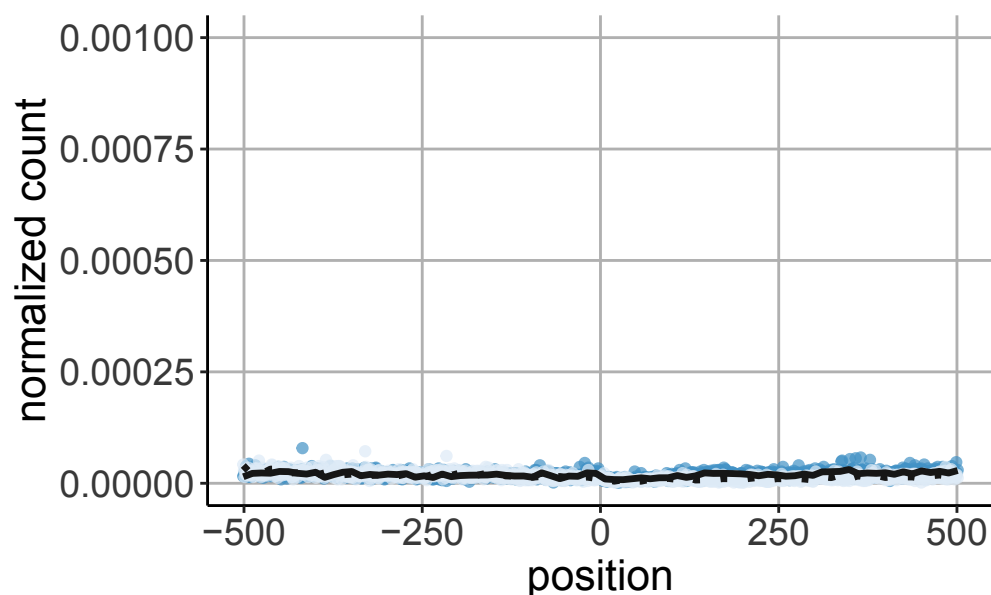

RBM46-GUGAUUG

• antisense — sense • antisense • sense

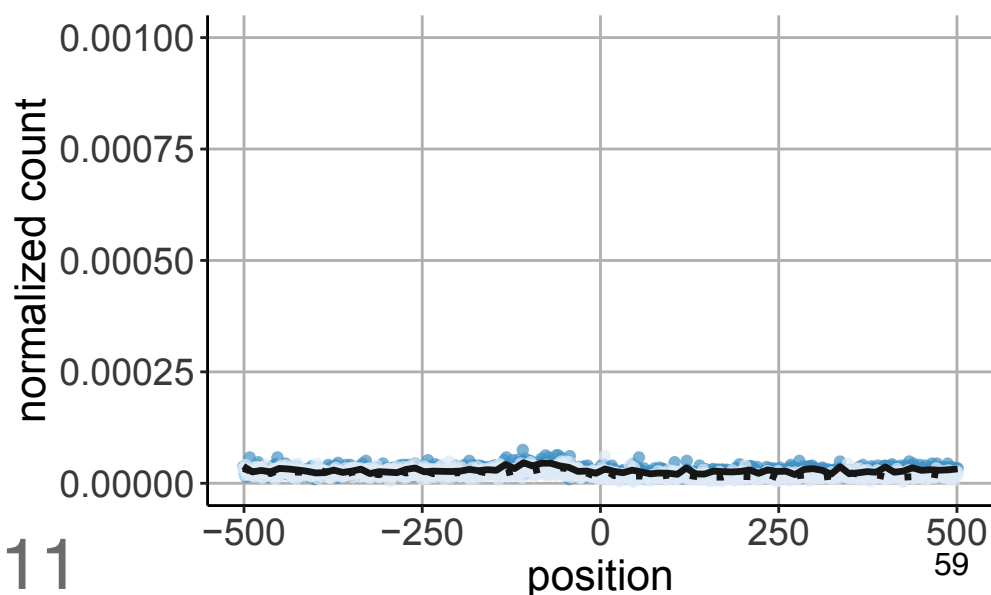

TSS

ESRP1\_3-GGUGUGGUGU

• antisense — sense • antisense • sense

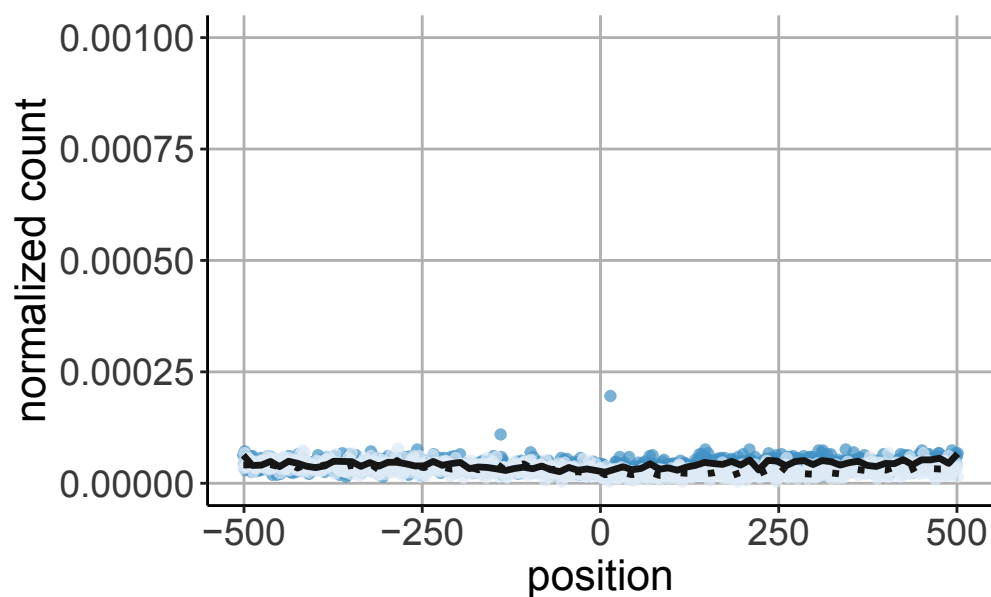

SNRPB2-GGGUGUGCAC

• antisense — sense • antisense • sense

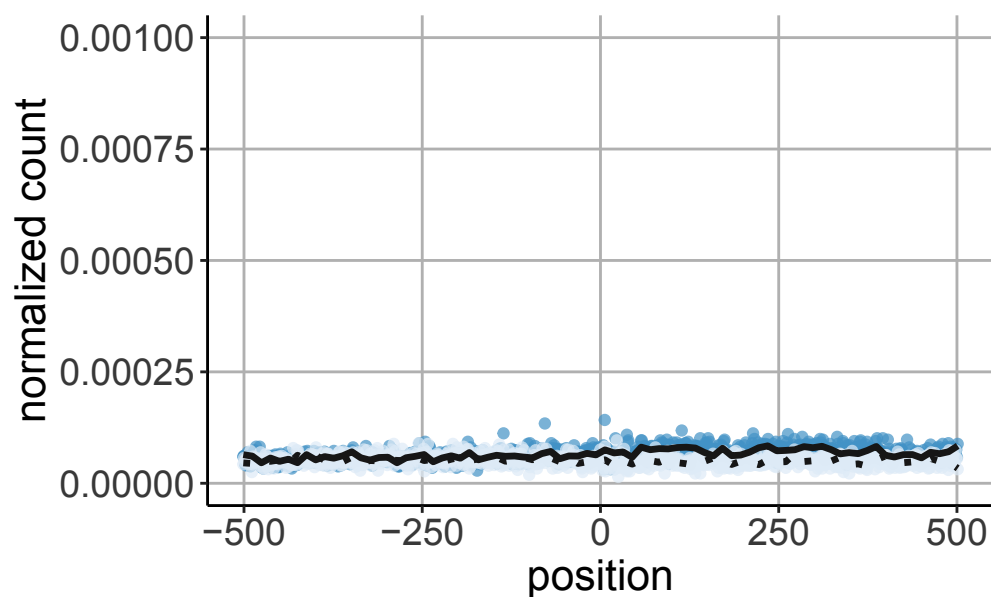

SNRPB2-NNCAUUGCACN

• antisense — sense • antisense • sense

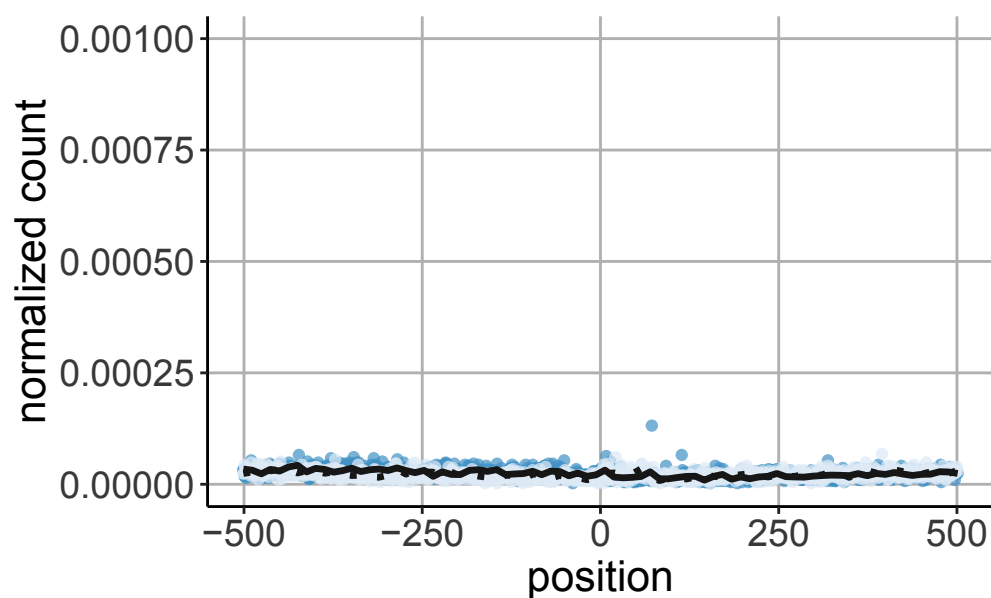

MEX3C-NNAGAGUUUAUNN

• antisense — sense • antisense • sense

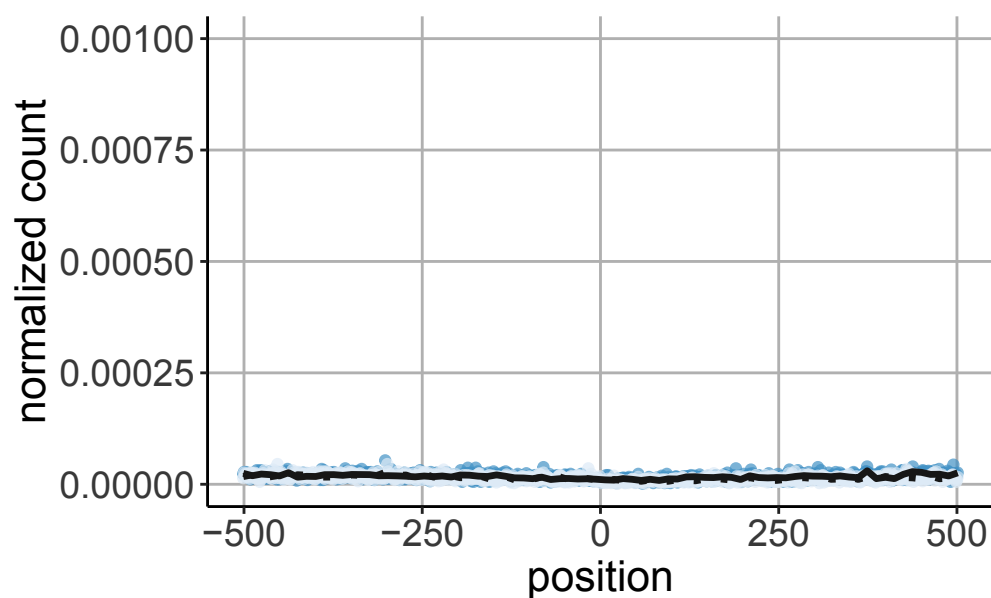

HNRNPA0-KUAGKUUAGGK

• antisense — sense • antisense • sense

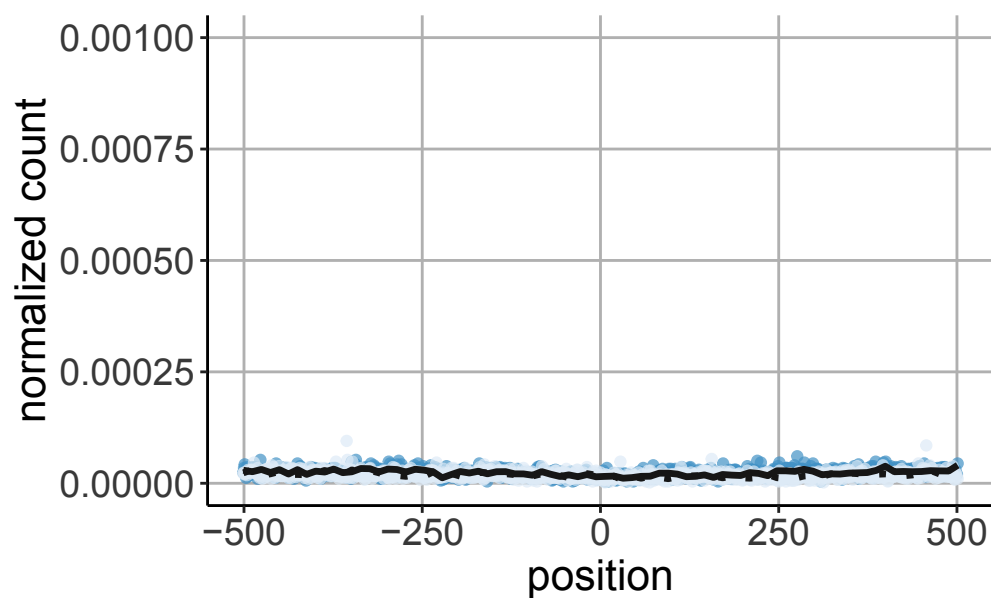

HNRNPA0-KUAGKUUUAGGK

• antisense — sense • antisense • sense

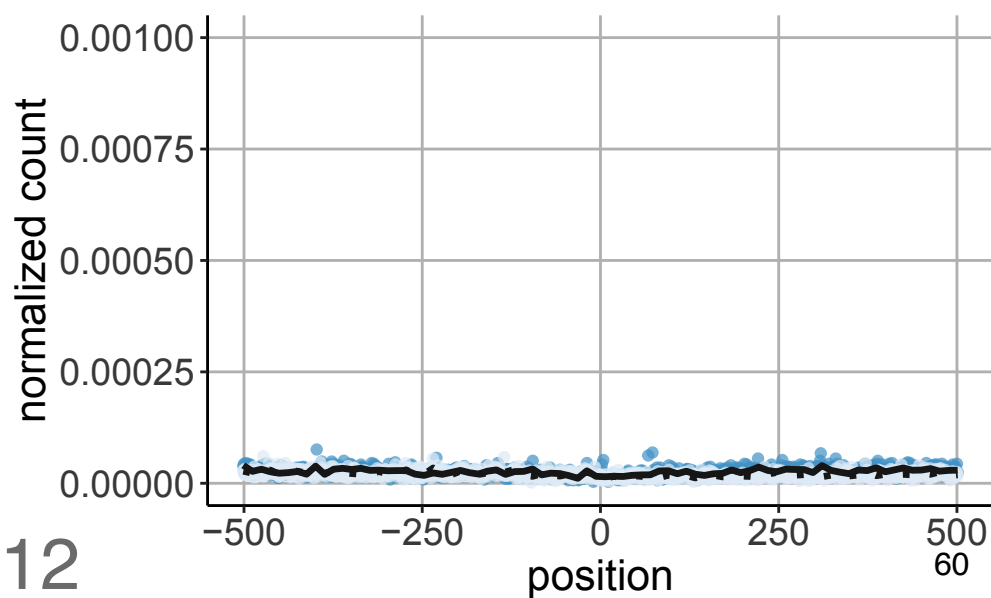

TSS

SNRPA-CAUUGCACN

SNRPA-NUGCACR

• antisense — sense • antisense • sense

• antisense — sense • antisense • sense

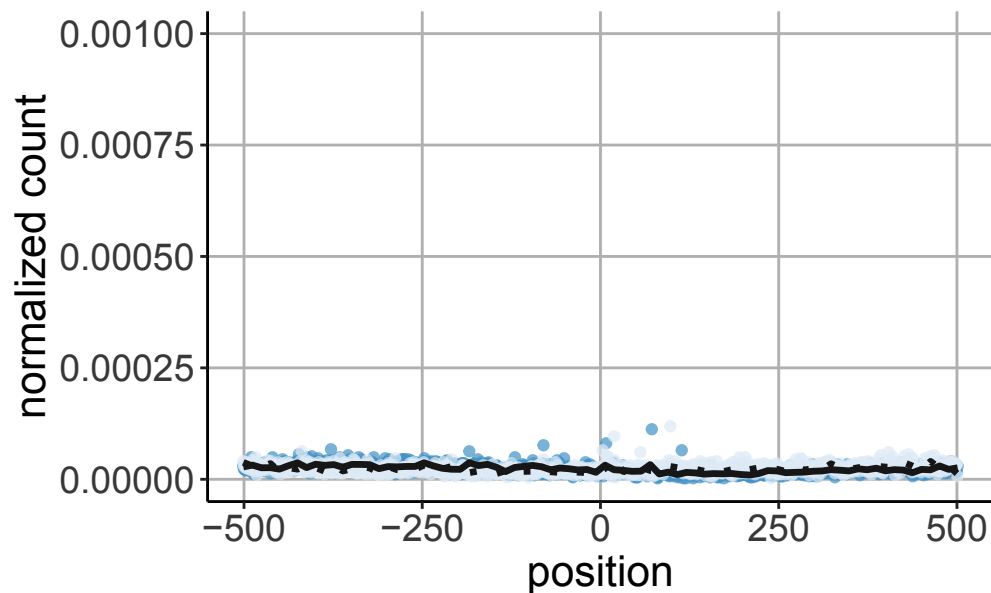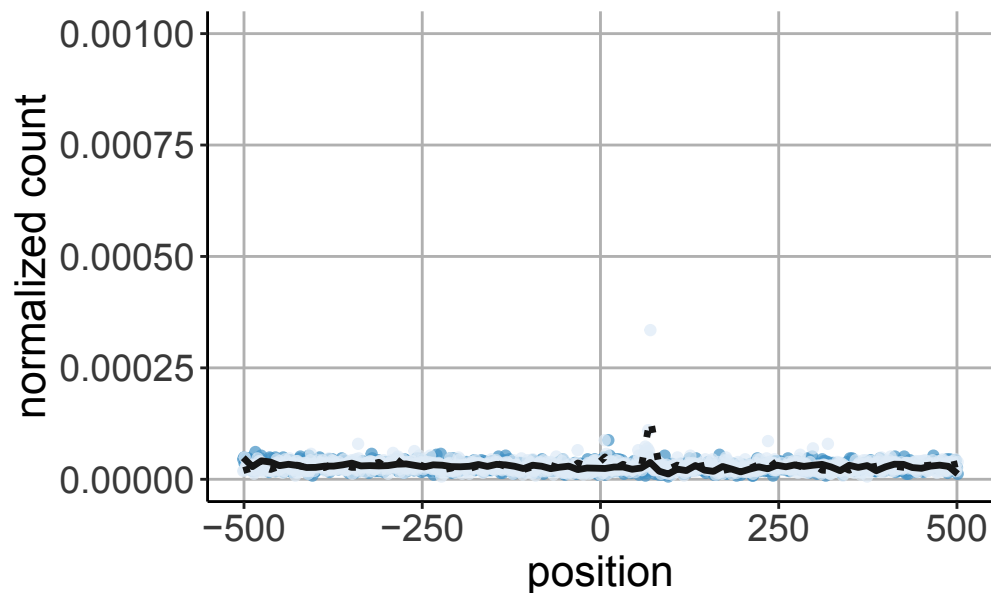

MEX3B\_3-UAGAGUUUUAU

MEX3B\_3-UAUUUUAU

• antisense — sense • antisense • sense

• antisense — sense • antisense • sense

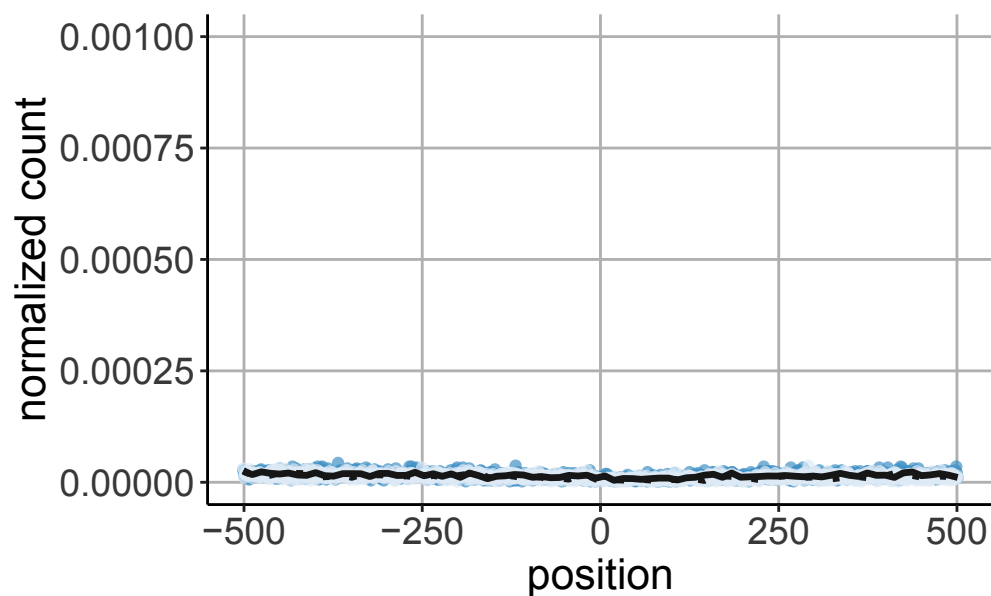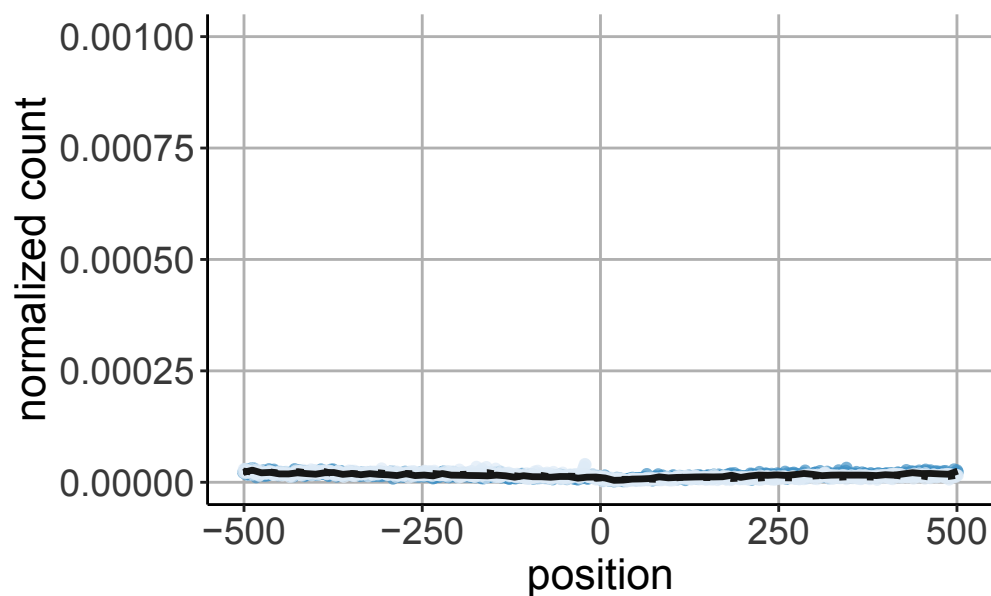

KHDRBS2-UAAACAAUAA

CELF3\_2-UGUGUNUGUGU

• antisense — sense • antisense • sense

• antisense — sense • antisense • sense

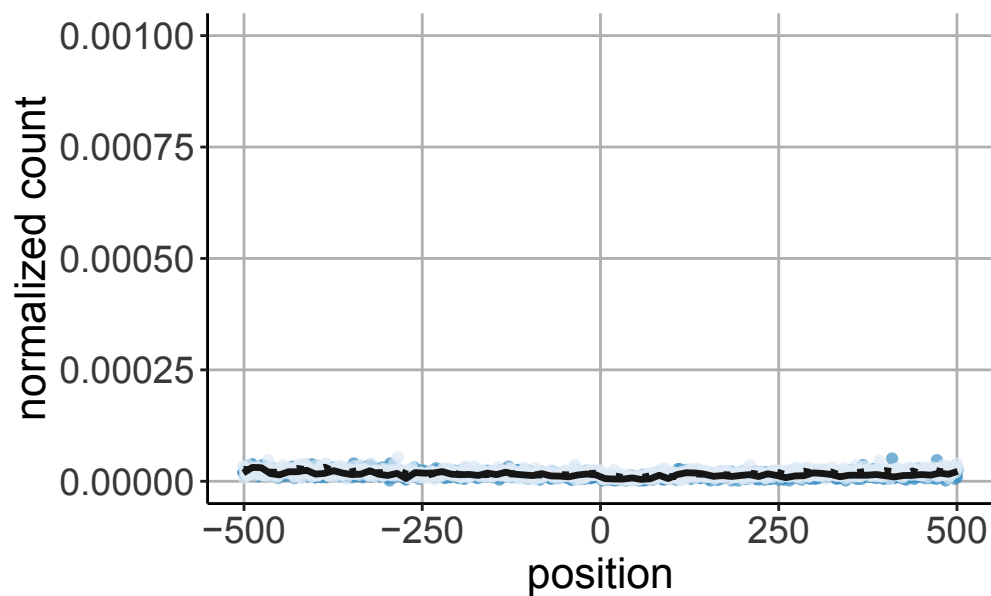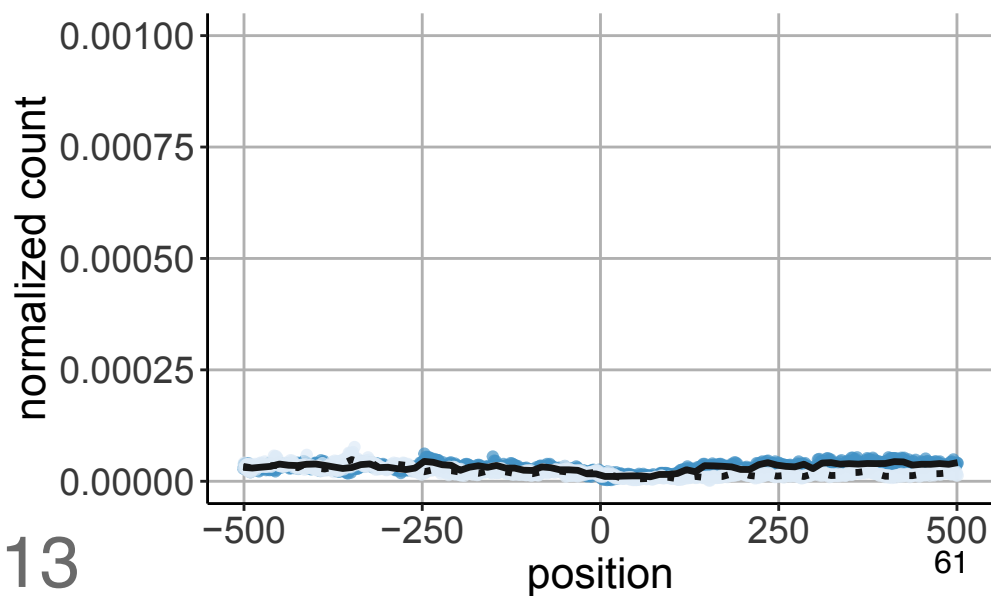

TSS

RNPC3-GGGDDGGGDKUACKKGGK

• antisense — sense    • antisense • sense

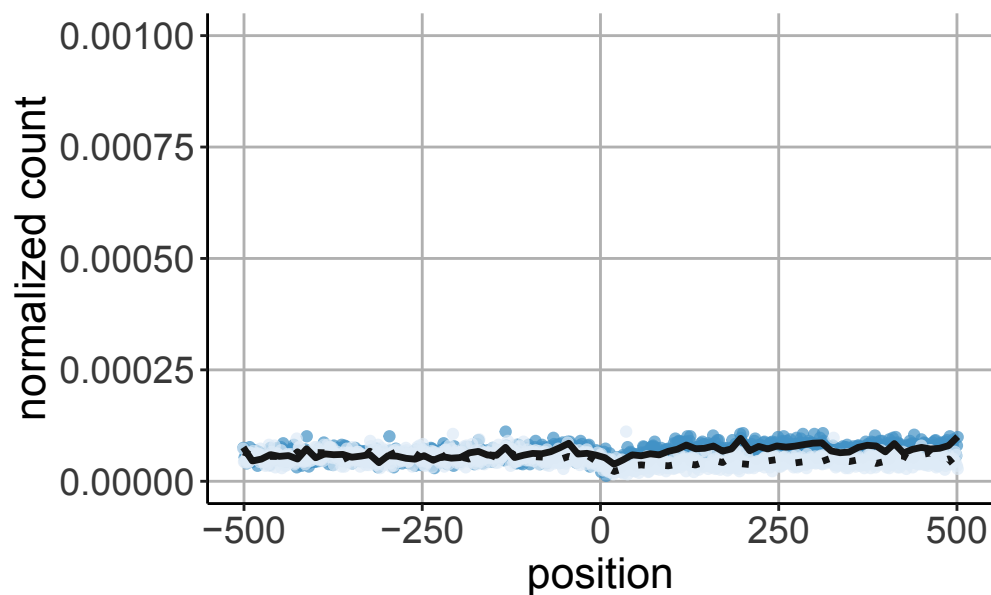

RBM14-UGCGUCG

• antisense — sense    • antisense • sense

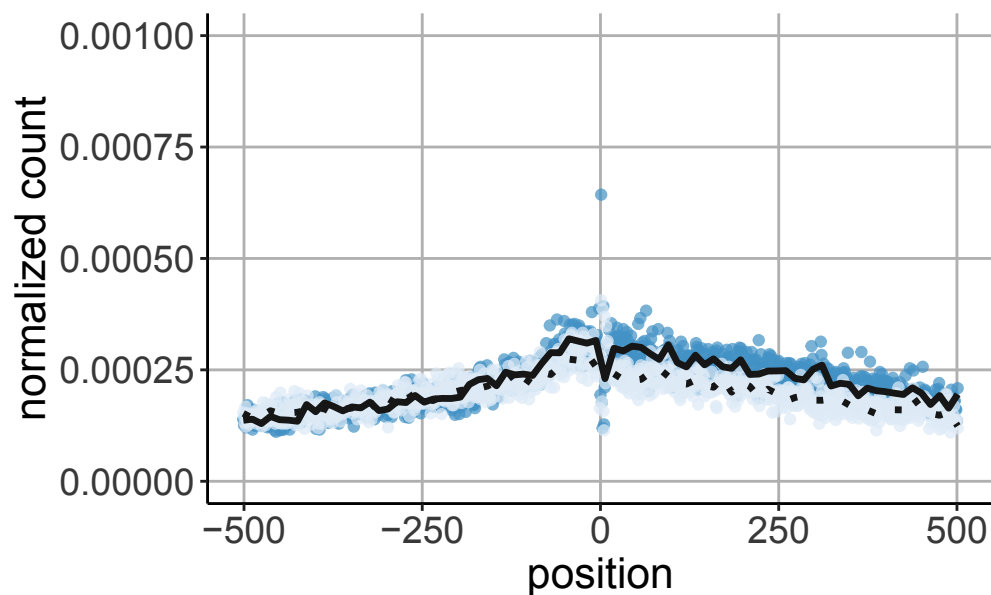

CELF4-UGUGUUGUGU

• antisense — sense    • antisense • sense

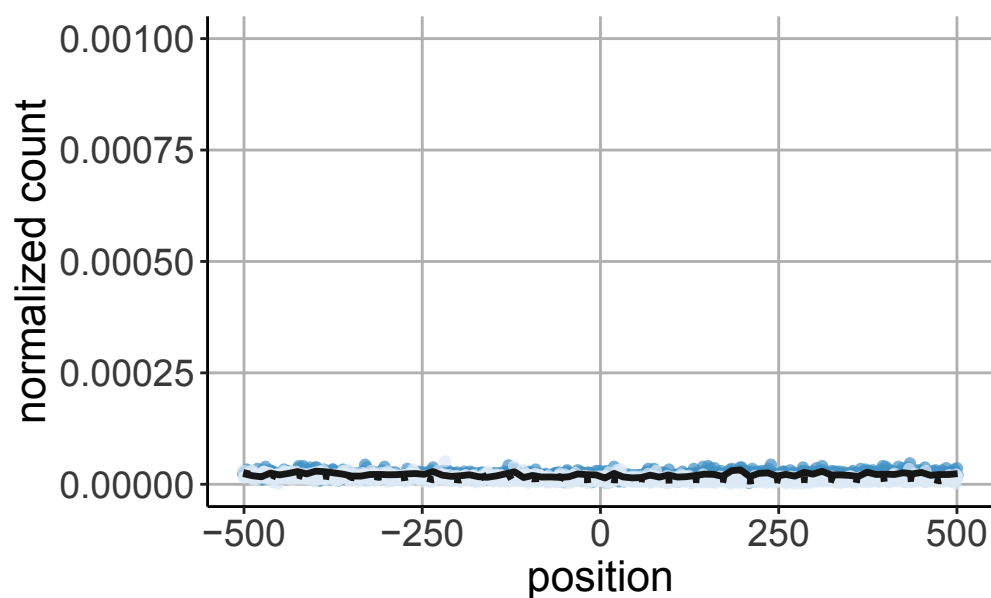

ZRANB2-NNGGUAAGGUNN

• antisense — sense    • antisense • sense

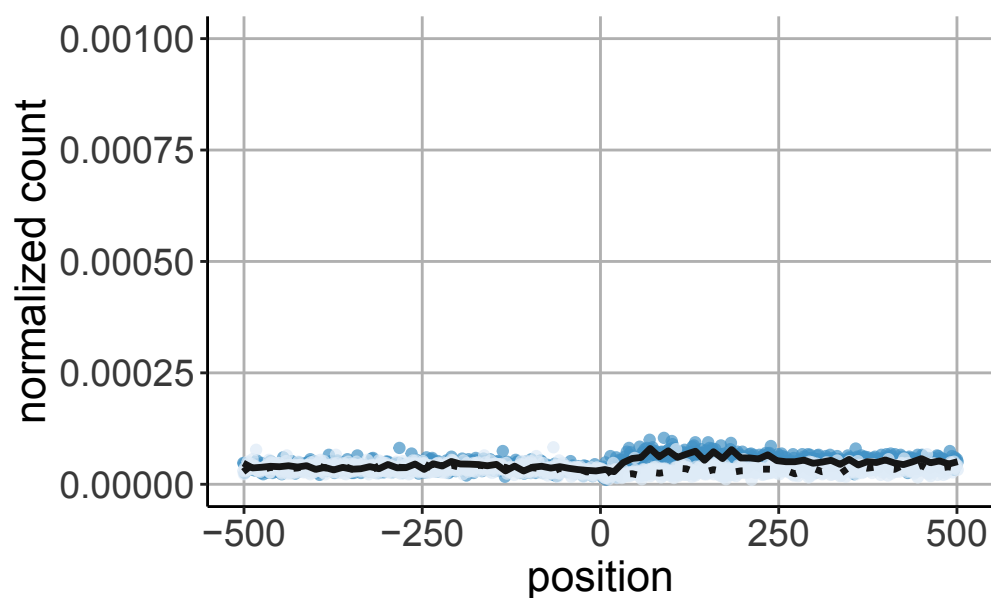

RBM4-CGGGGURUGN

• antisense — sense    • antisense • sense

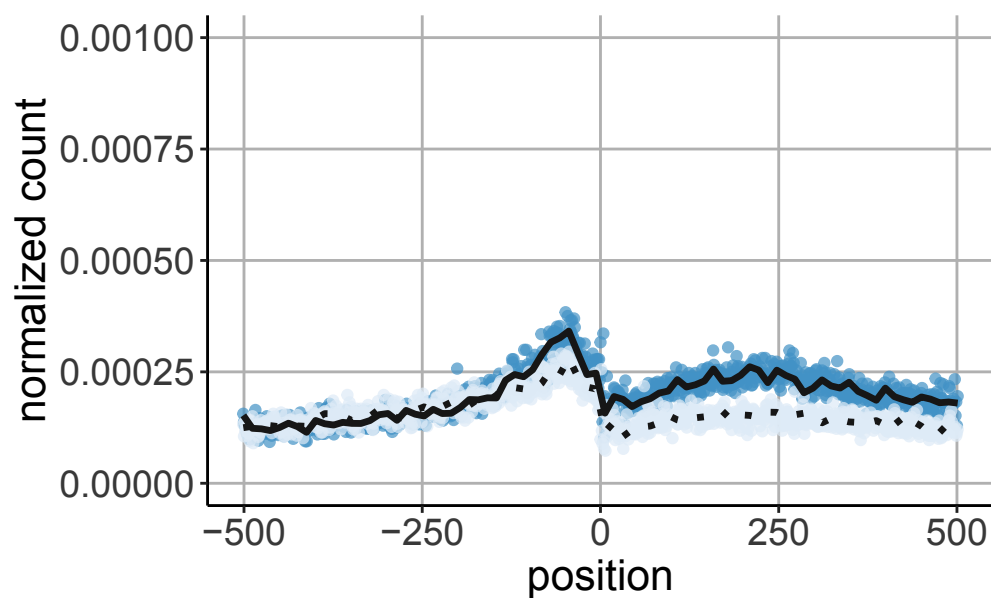

RBPMS-NAGGCACR

• antisense — sense    • antisense • sense

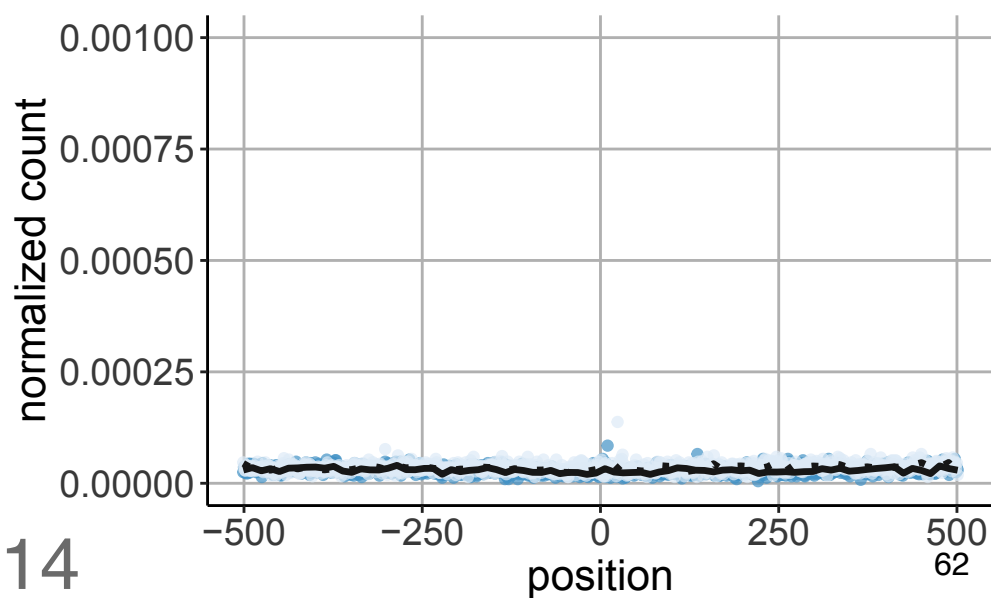

TSS

RBPMS-UCACGNGCACN

• antisense — sense    • antisense • sense

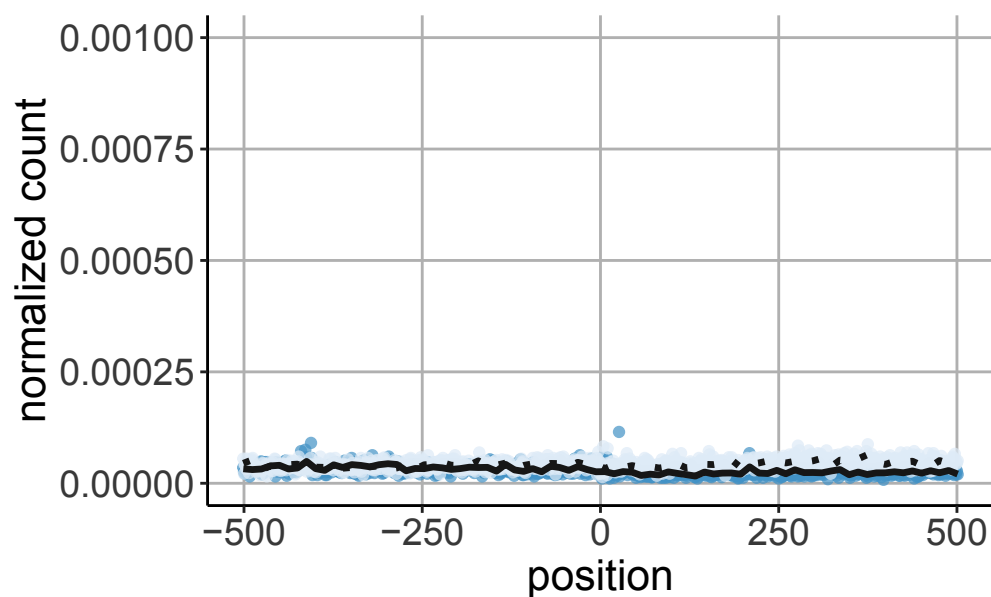

CELF1\_2-UGUGUNUGUGU

• antisense — sense    • antisense • sense

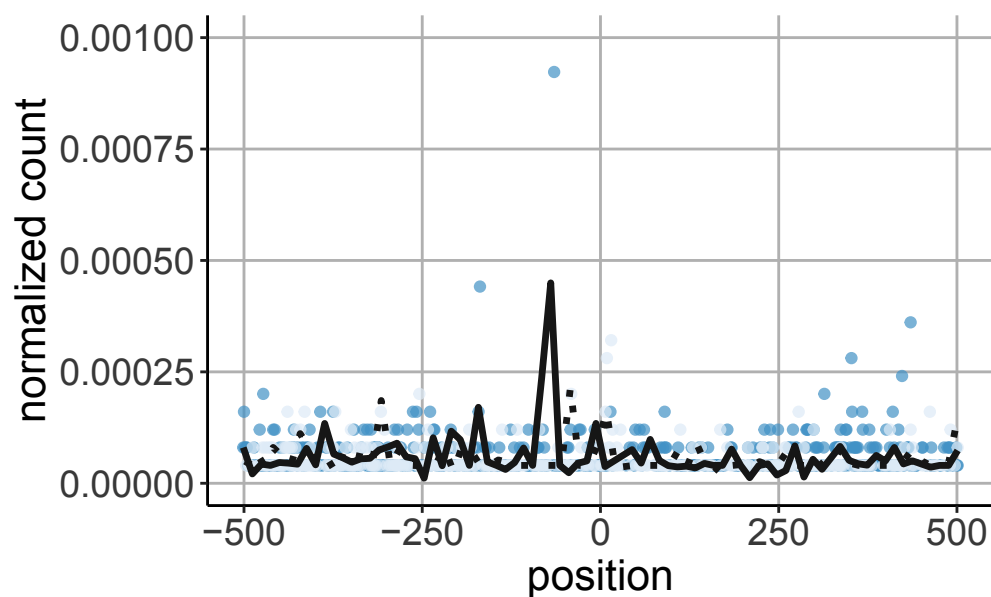

CSTF2-RRGGCGUAGCGUNN

• antisense — sense    • antisense • sense

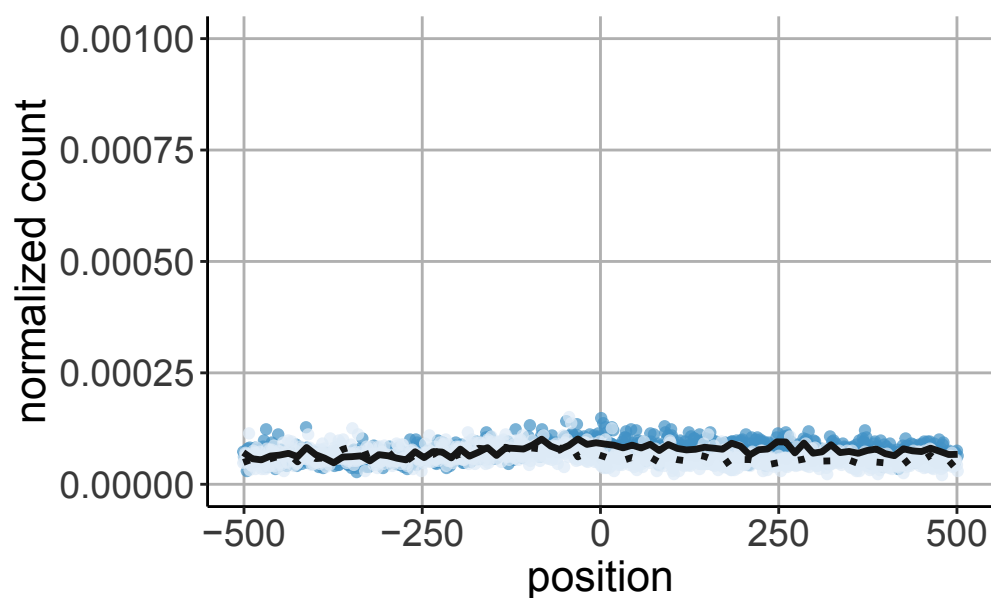

RBM28-GRGGCCGNGCGGUGG

• antisense — sense    • antisense • sense

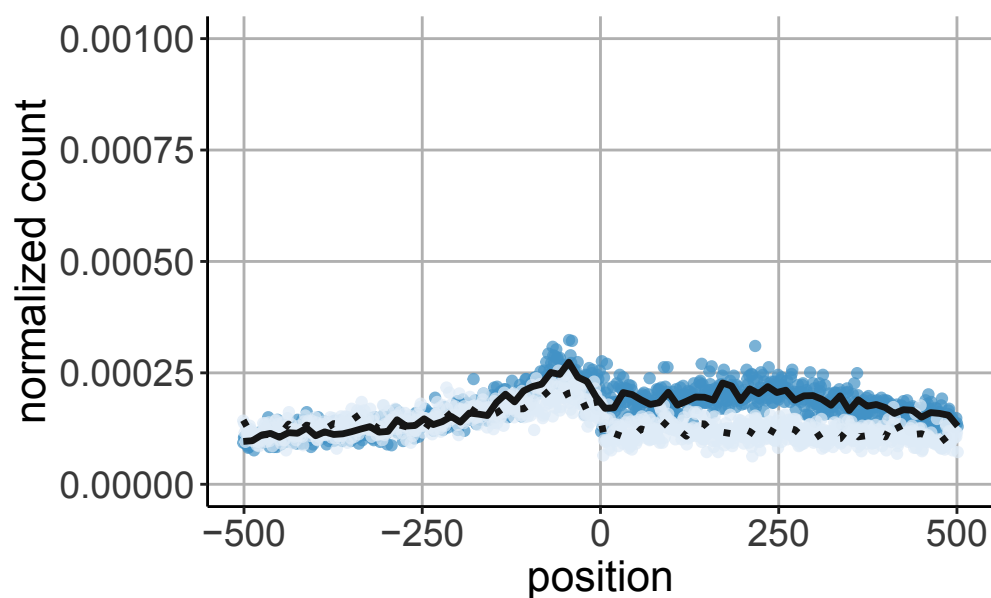

RBM28-GUGGGUCUCGG

• antisense — sense    • antisense • sense

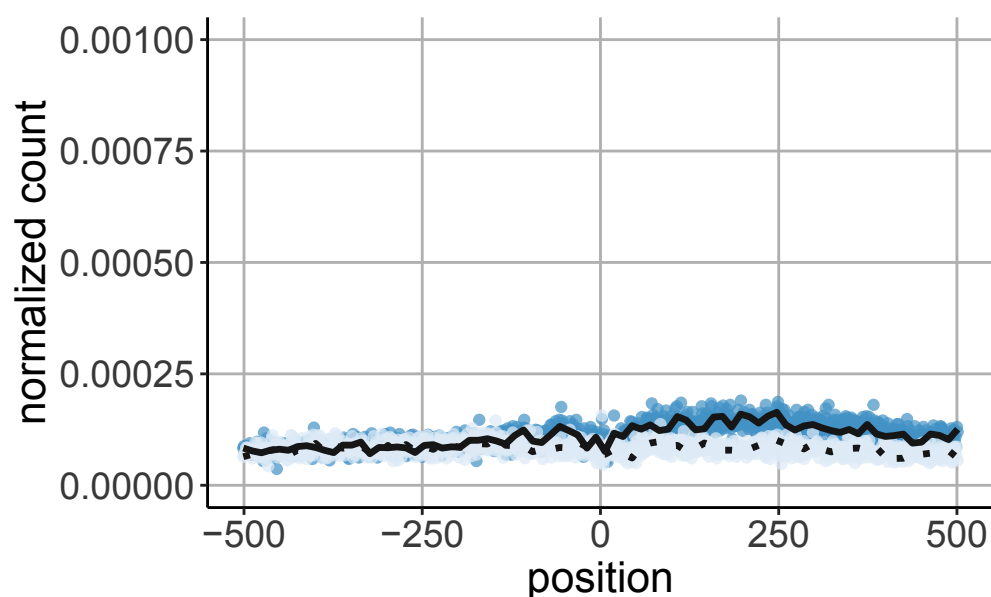

ZC3H10-GCGCAUGCGNN

• antisense — sense    • antisense • sense

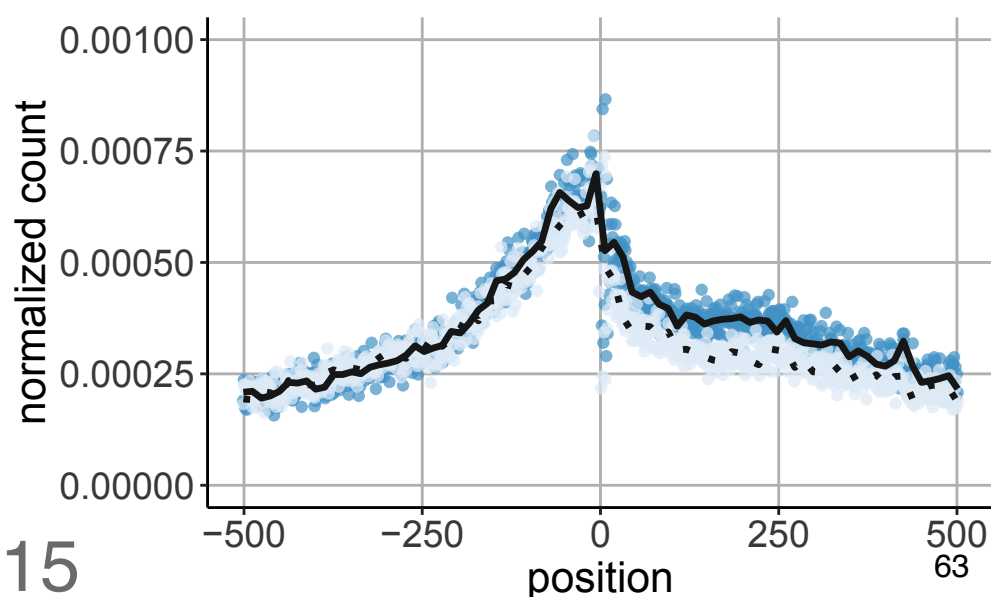



TSS

ZC3H10-NGCGCAGCGUN

• antisense — sense • antisense • sense

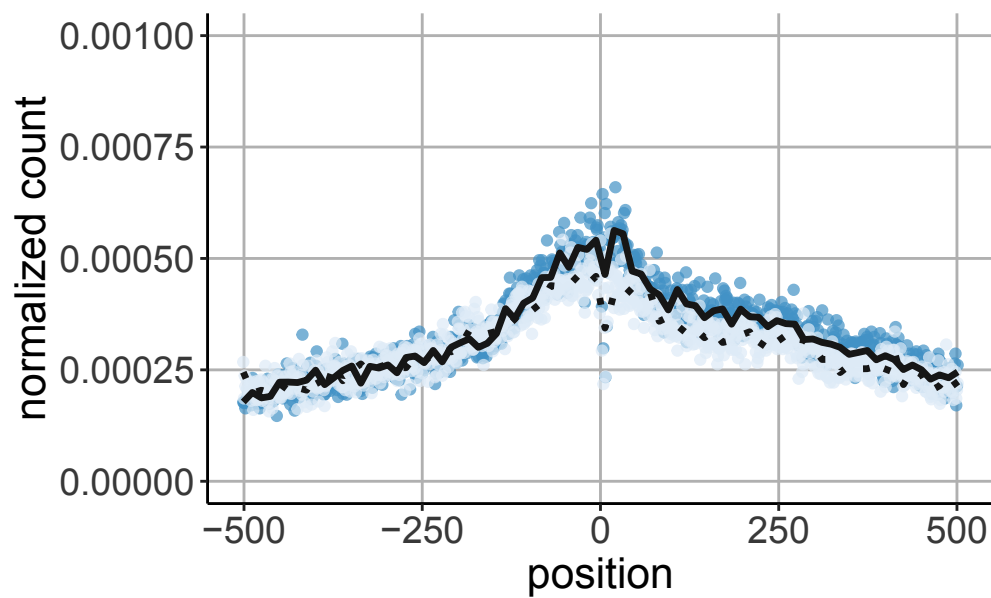

RBFOX1\_2-GCAUGNNGCAUG

• antisense — sense • antisense • sense

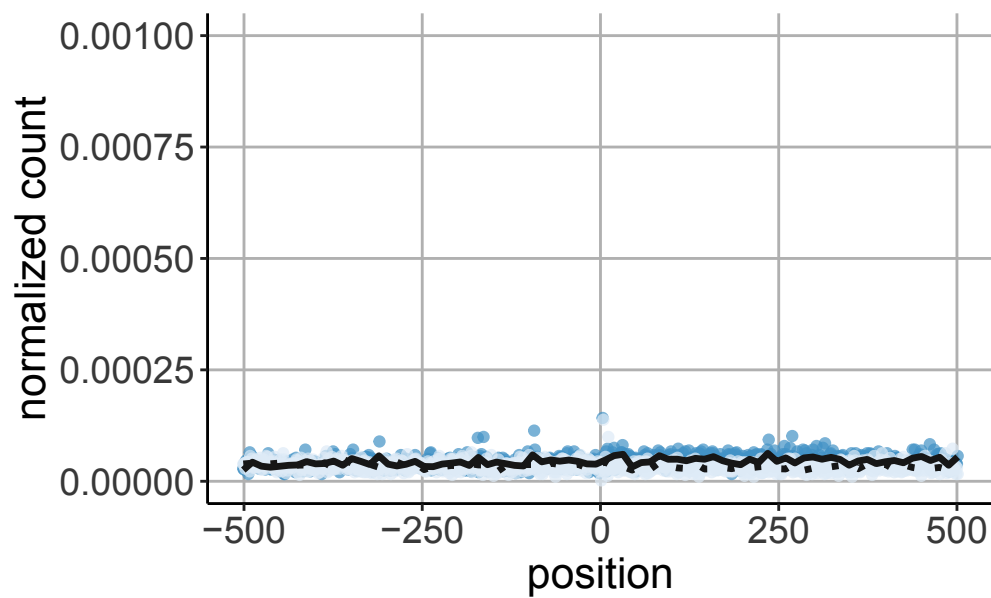

MSI1-KUAGUWKUAGK

• antisense — sense • antisense • sense

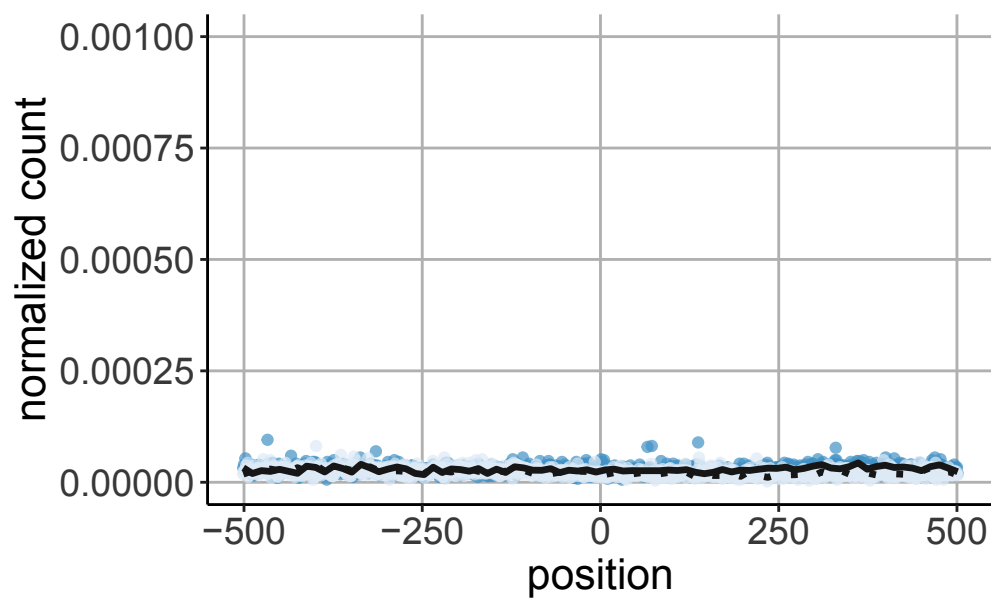

HEXIM1-GKDKCGACGGK

• antisense — sense • antisense • sense

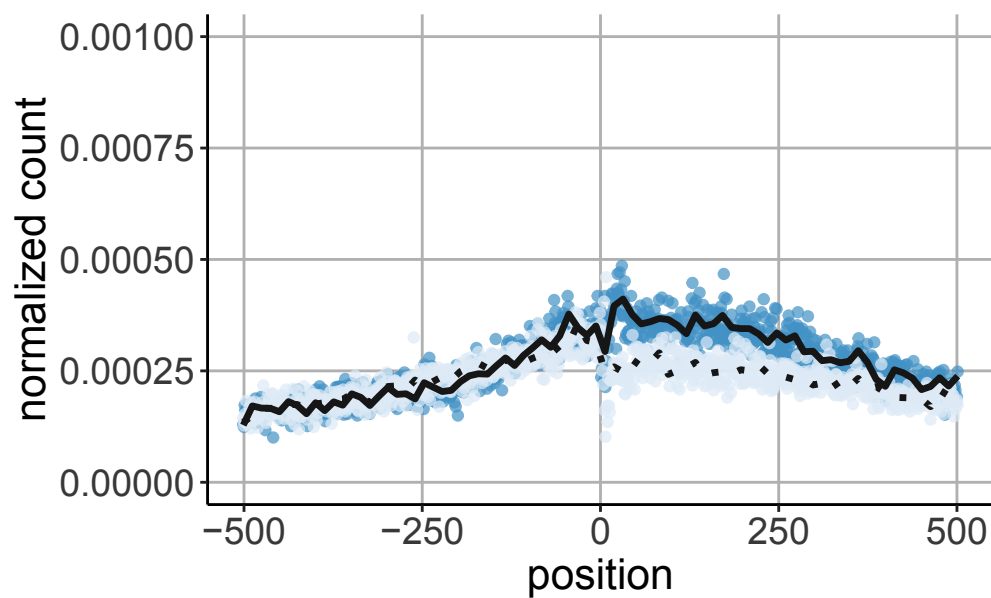

SART3-NGUUAGCRK

• antisense — sense • antisense • sense

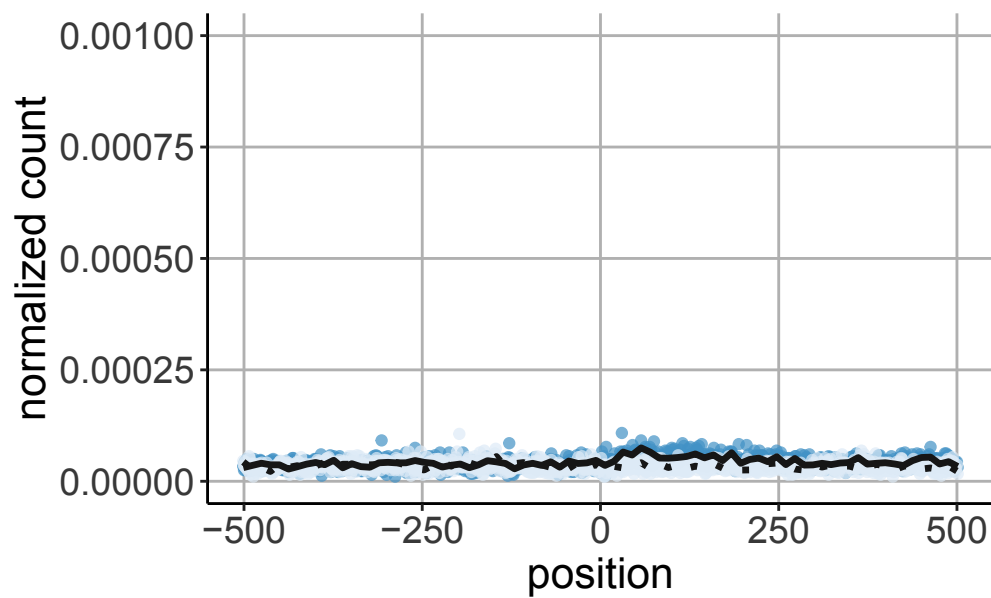

MSI2-GUAGUGDGUAGK

• antisense — sense • antisense • sense

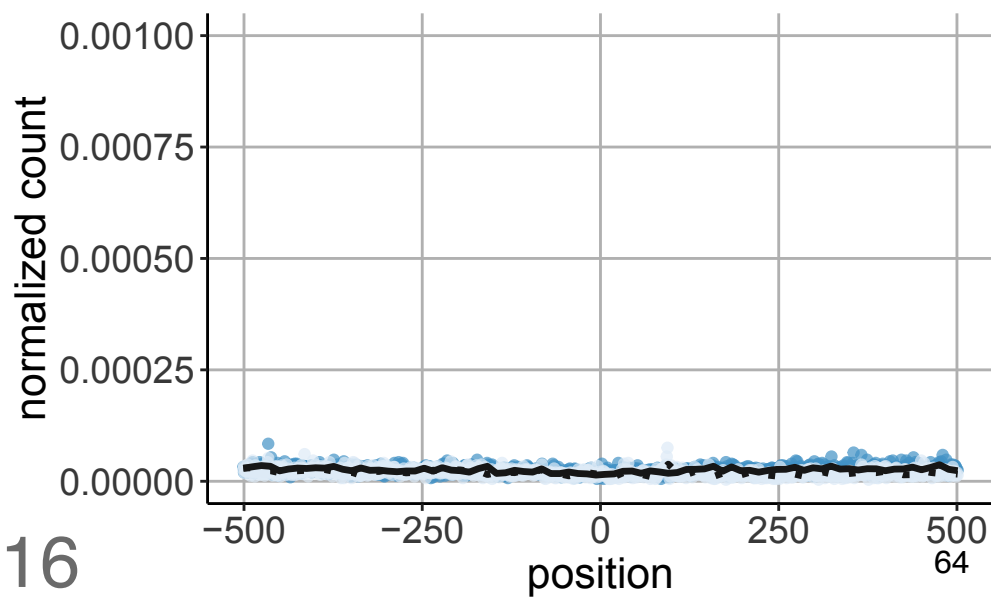

TSS

MSI2-GUAGUNNNGUAGK

• antisense — sense • antisense • sense

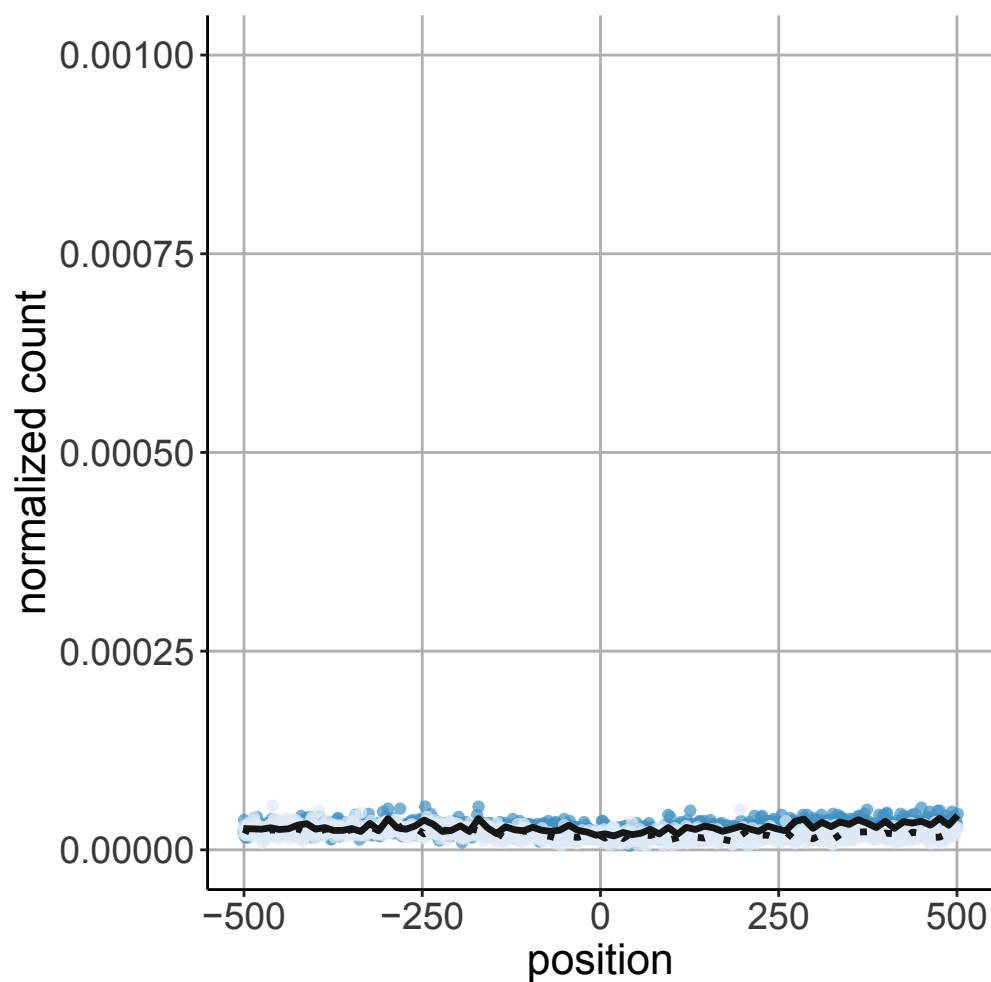

ZCRB1-GNNUUAAKK

• antisense — sense • antisense • sense

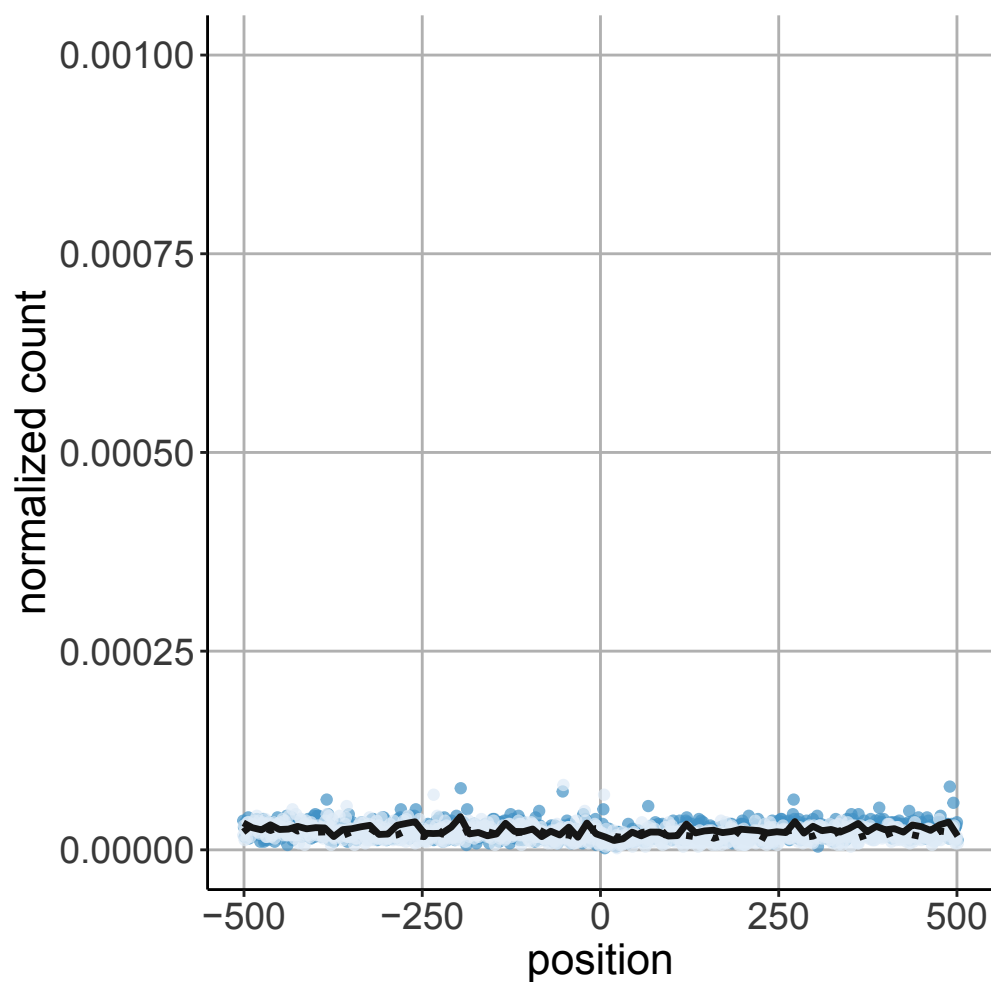

ZCRB1-GUGGACUUAA

• antisense — sense • antisense • sense

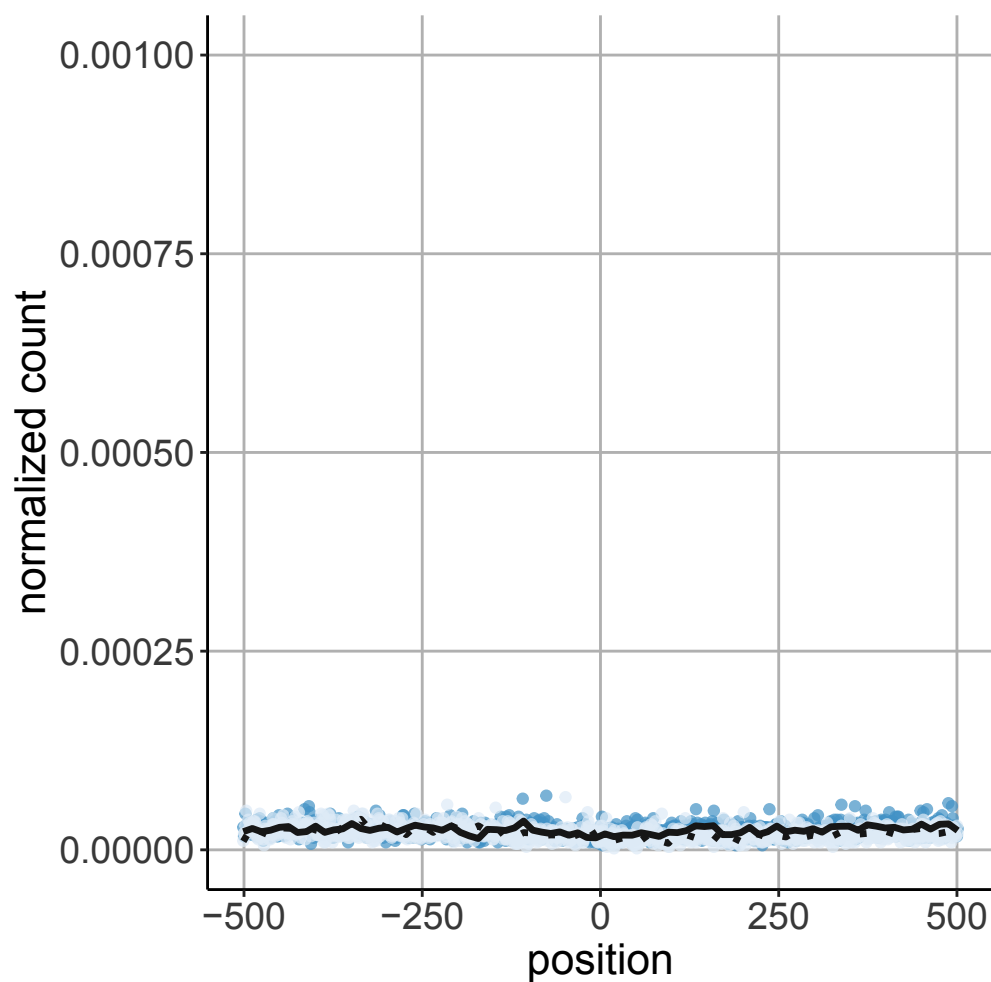

LARP6-GUGUCNNNNNNNNNGAAGUCN

• antisense — sense • antisense • sense

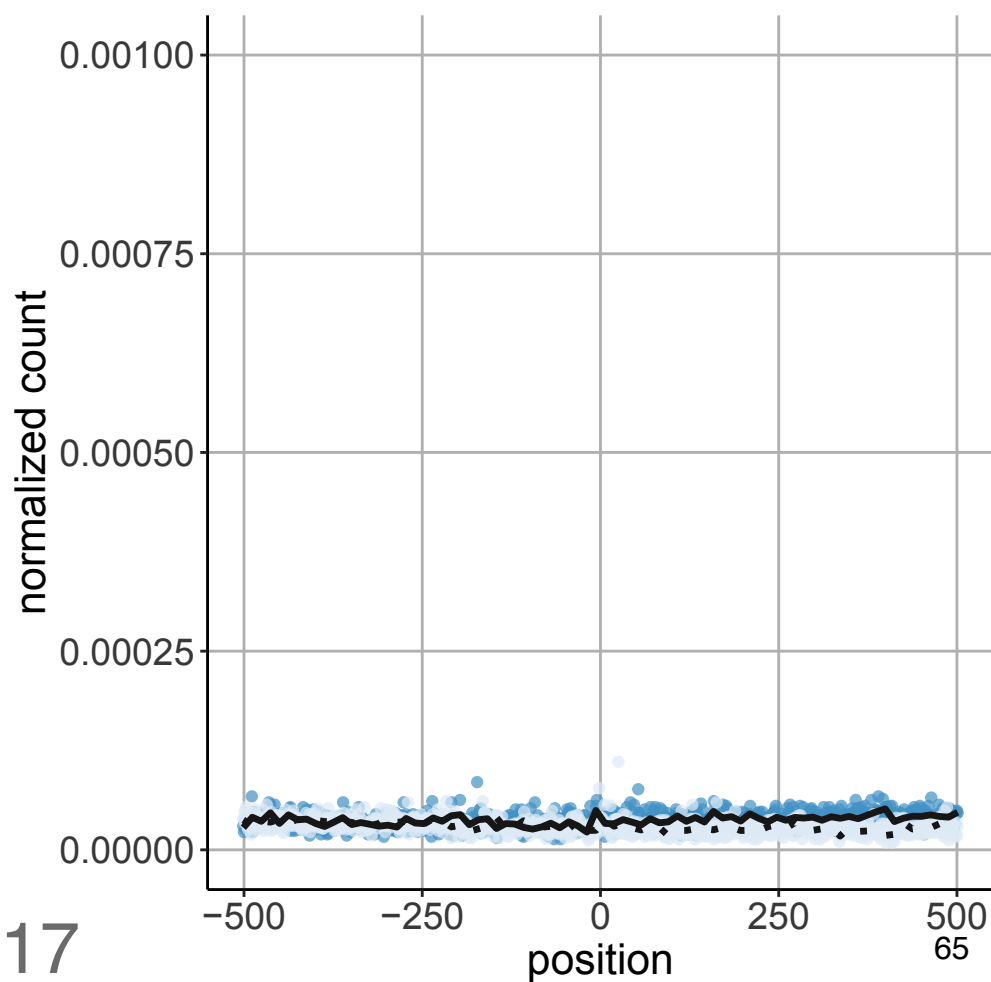

TSS

DAZ1\_2-NNUGUGUGSGUUUCCGSN

• antisense — sense    • antisense • sense

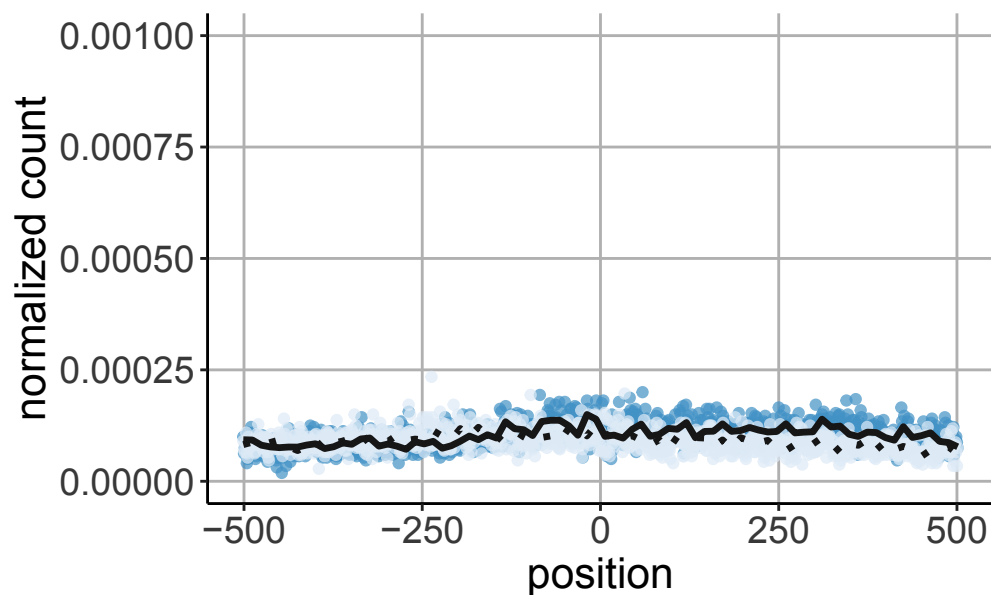

DAZ1\_2-NUGKUGUUGUAGN

• antisense — sense    • antisense • sense

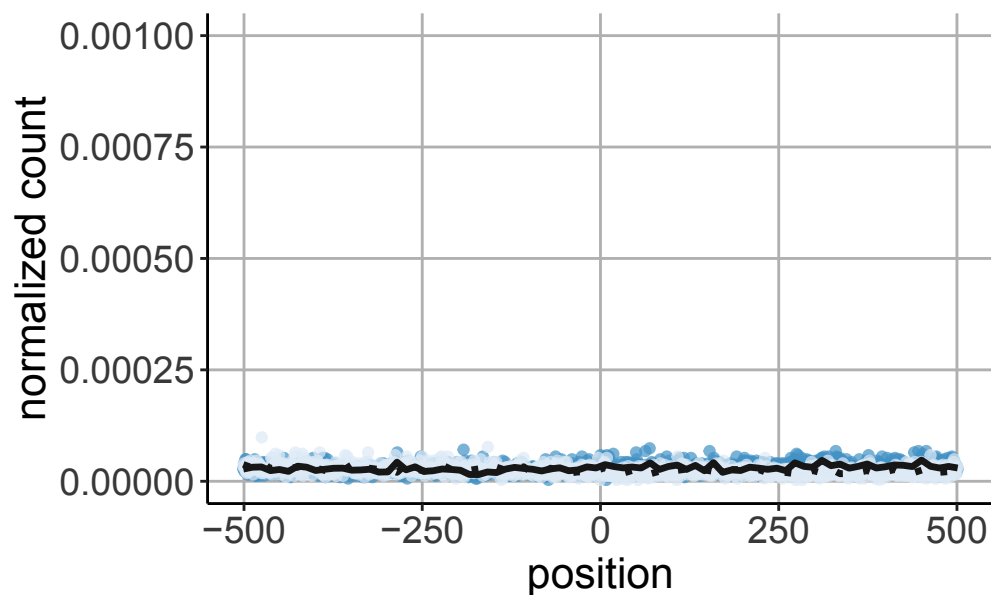

DAZ1\_2-CRNAAUGUUAGUAGN

• antisense — sense    • antisense • sense

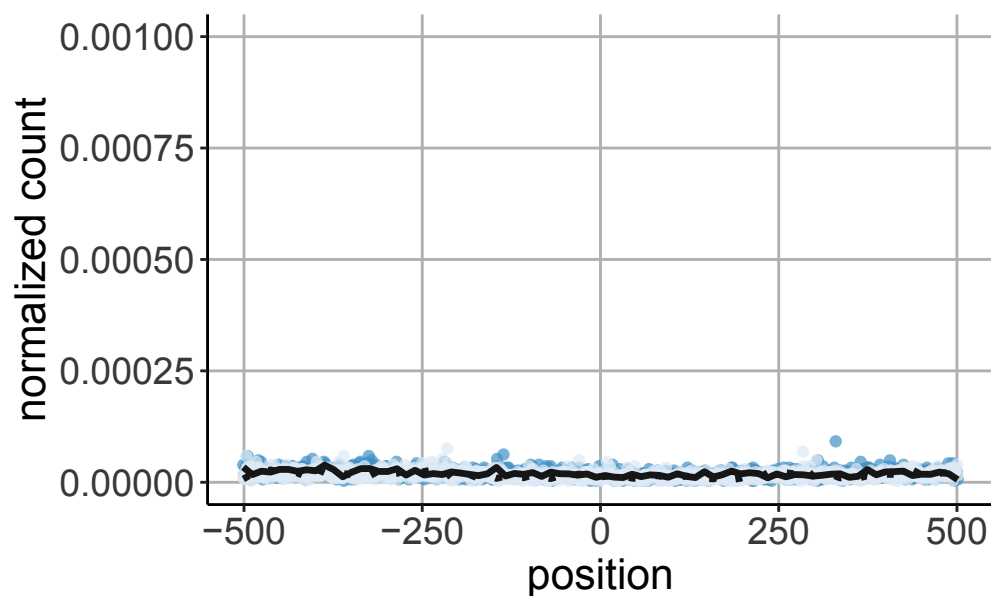

DAZ3-NNUGUGUGSGUUUCCGSN

• antisense — sense    • antisense • sense

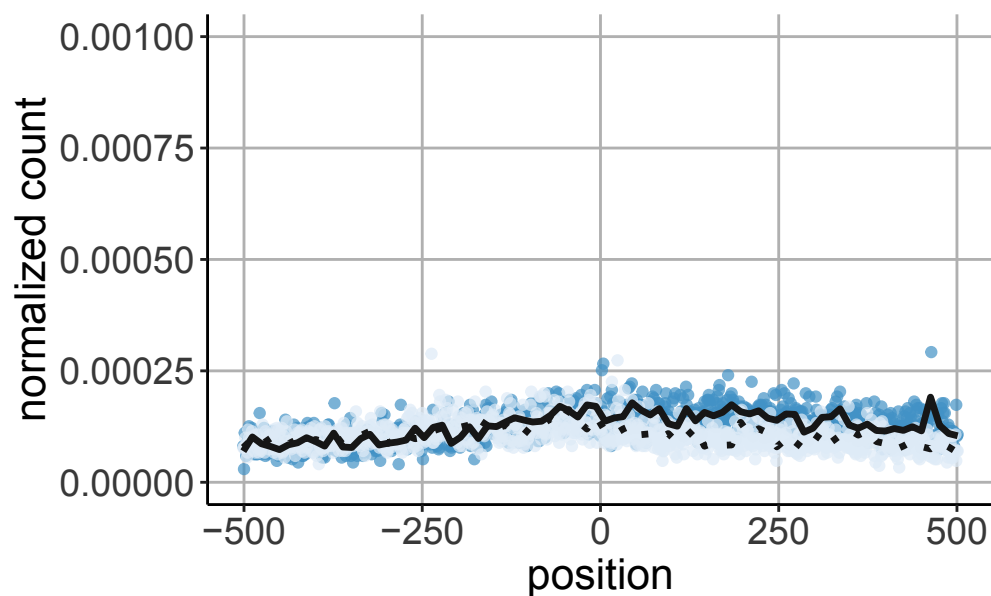

DAZ4-NNUGUGUGSGUUUCCGSN

• antisense — sense    • antisense • sense

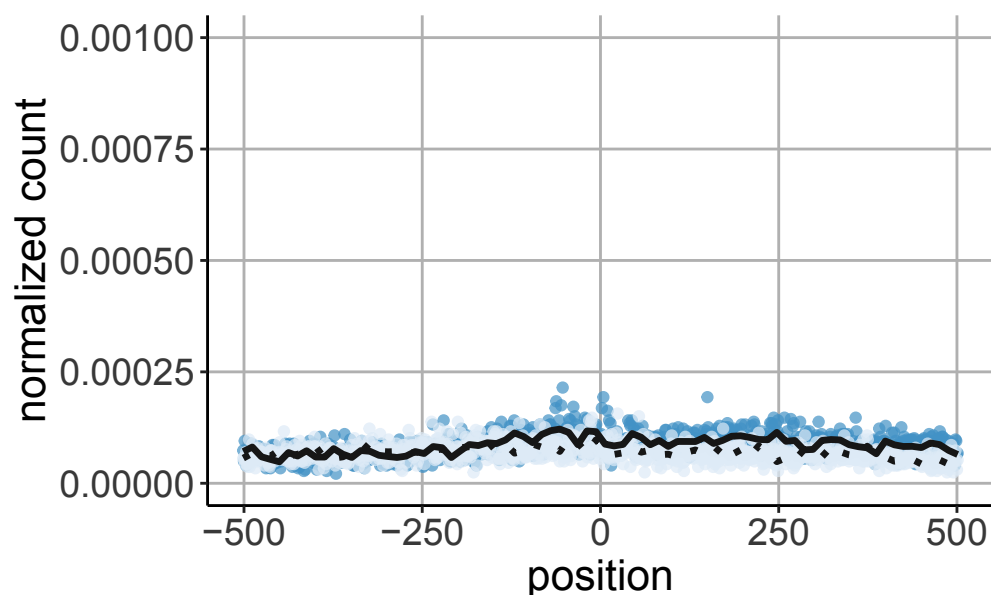

DAZ4-CUGKUGUUGUAGG

• antisense — sense    • antisense • sense

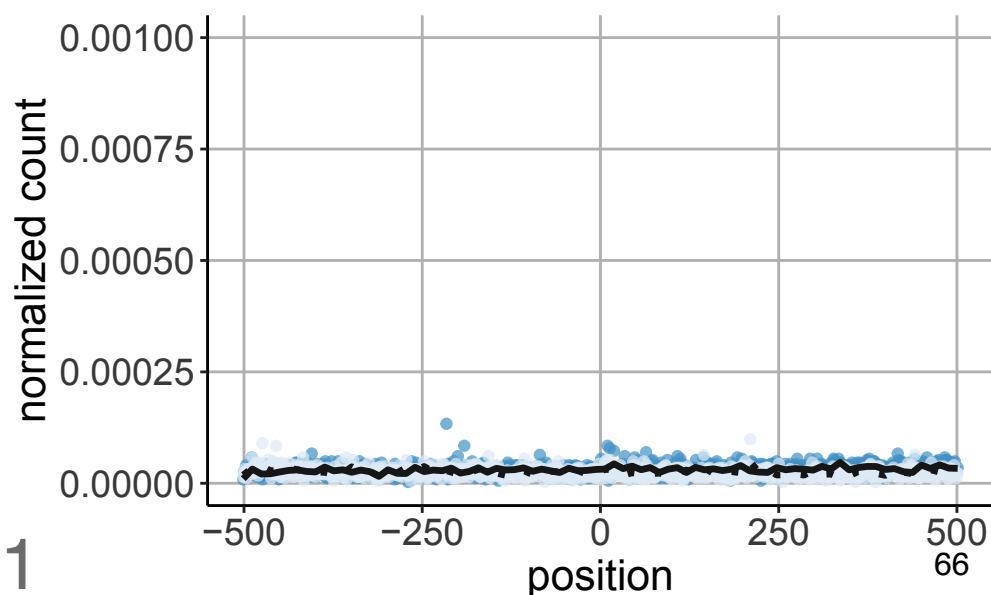

1

66

TSS

DAZL-NNUGYGUGCGUUUCCGSN

• antisense — sense    • antisense • sense

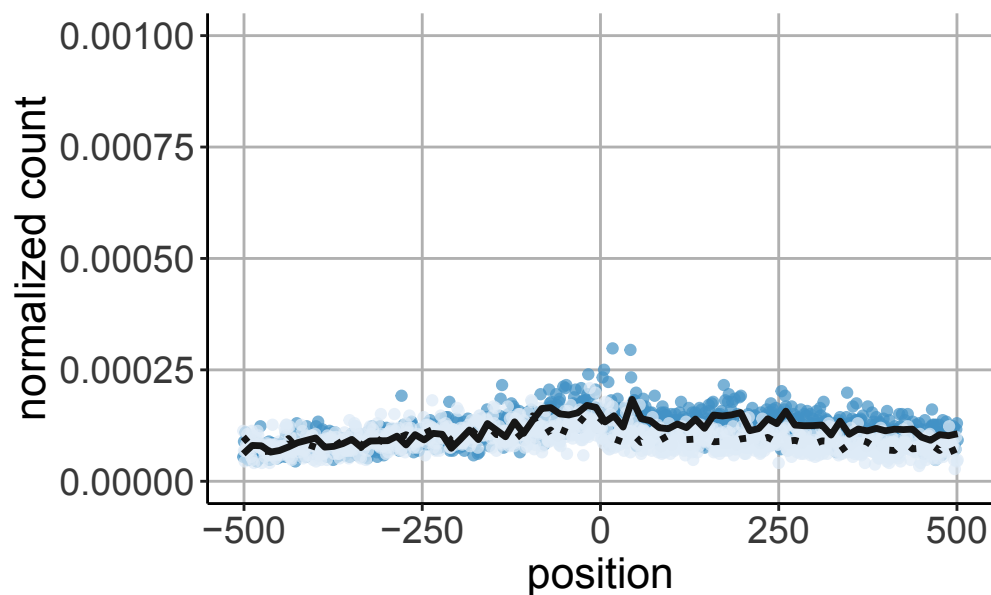

HNRNPA1-NGCAGUUUUAGGGCN

• antisense — sense    • antisense • sense

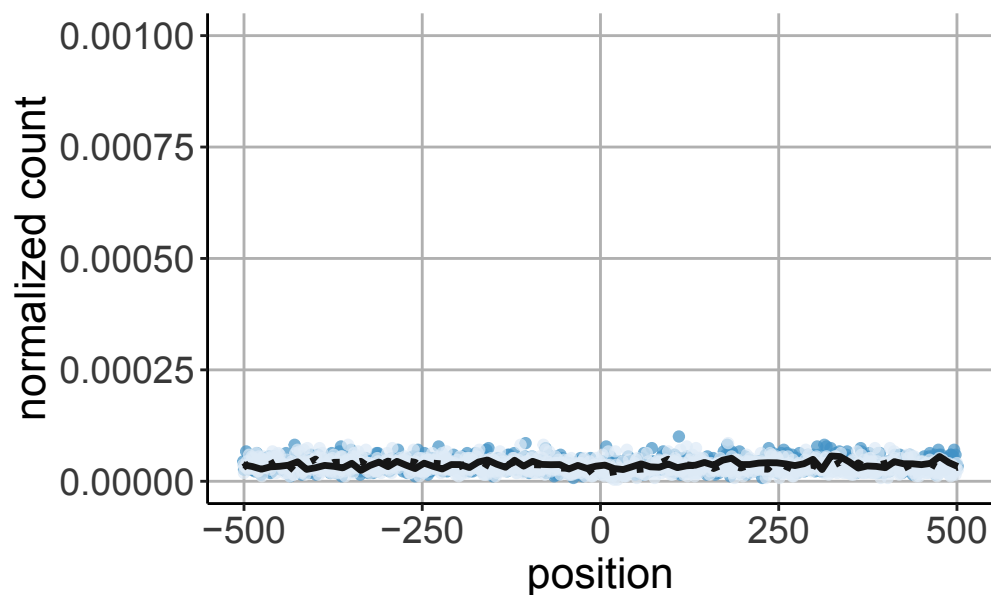

HNRNPC-NGGGUCUNAUUUUUUAAN

• antisense — sense    • antisense • sense

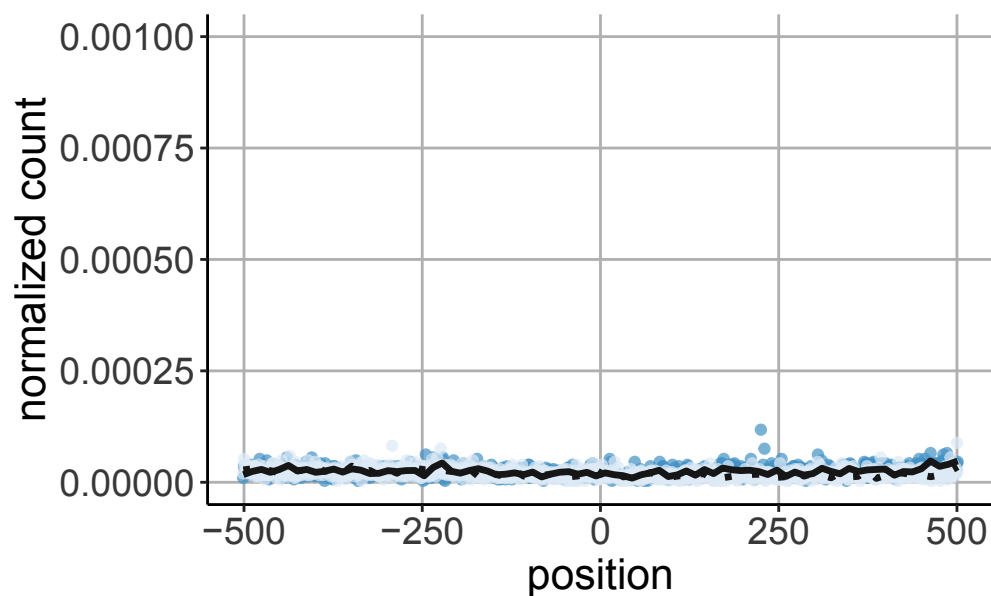

HNRNPCL1-NGGGUCUNAUUUUUUAAN

• antisense — sense    • antisense • sense

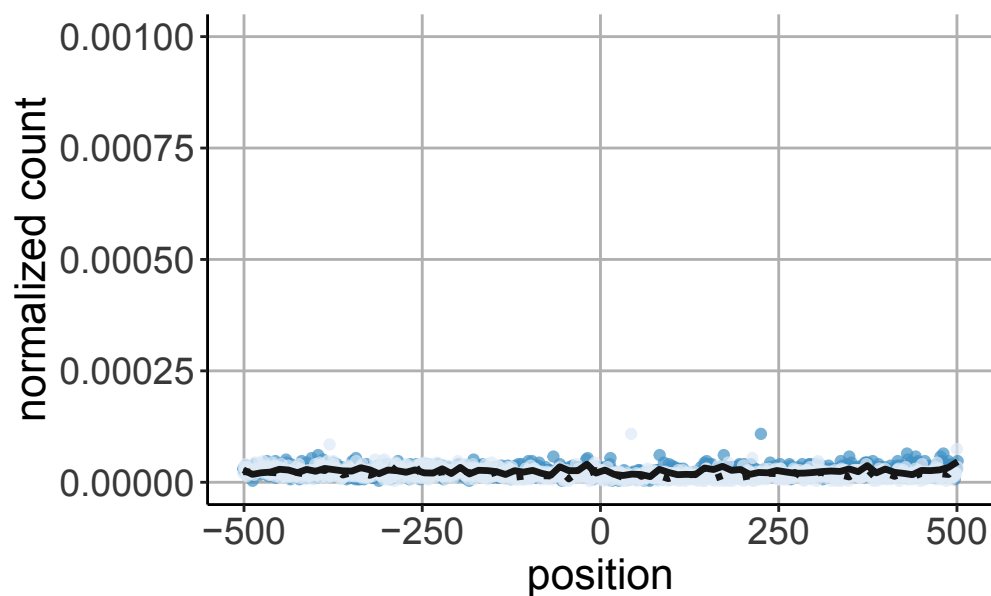

MKRN1-NYGUAAAKUGUAGN

• antisense — sense    • antisense • sense

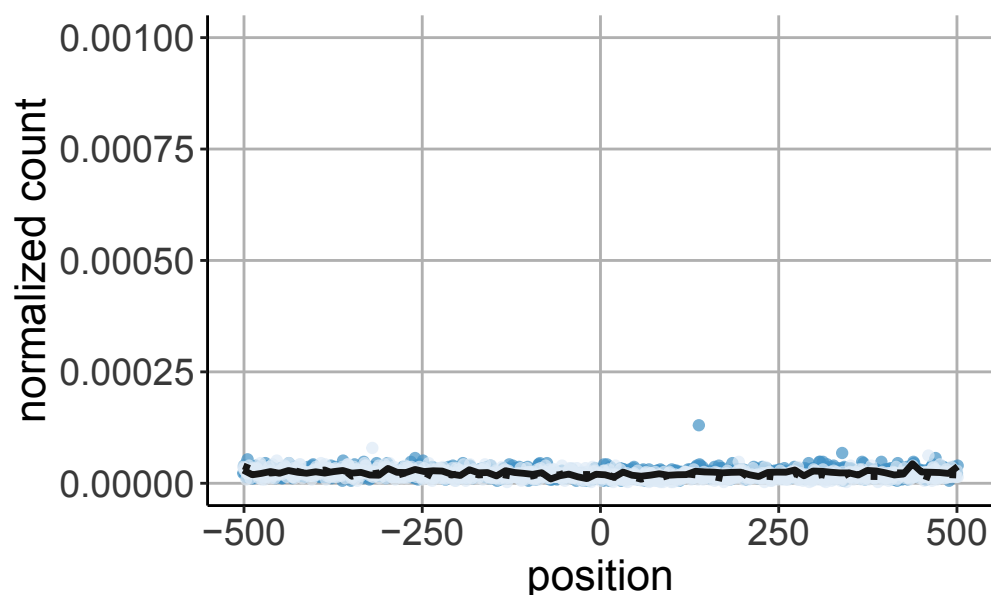

RALY-GGGUCUWUUUUUAA

• antisense — sense    • antisense • sense

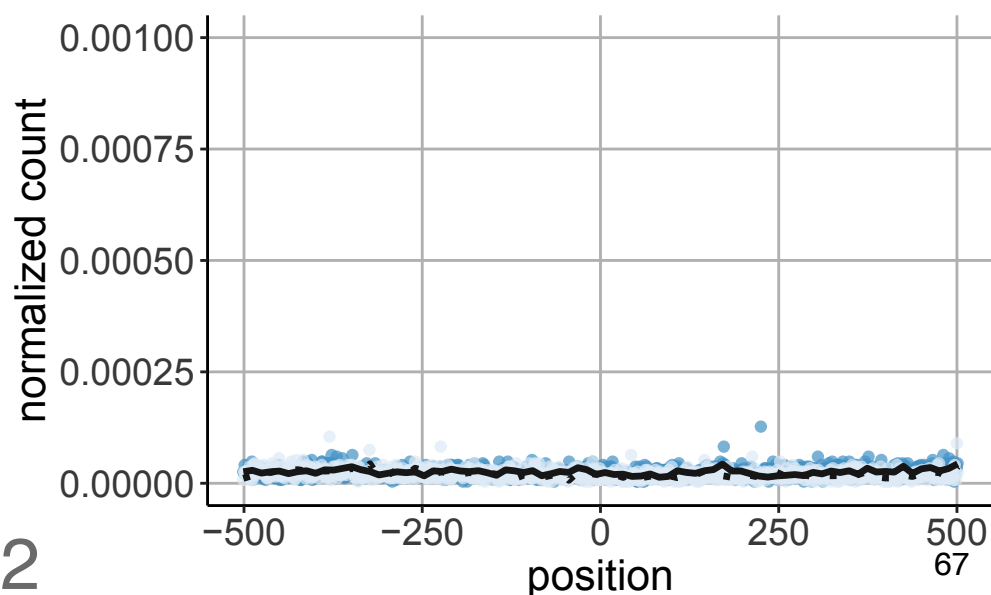

TSS

RBFOX1\_4-GKUGCAUGUG

• antisense — sense    • antisense • sense

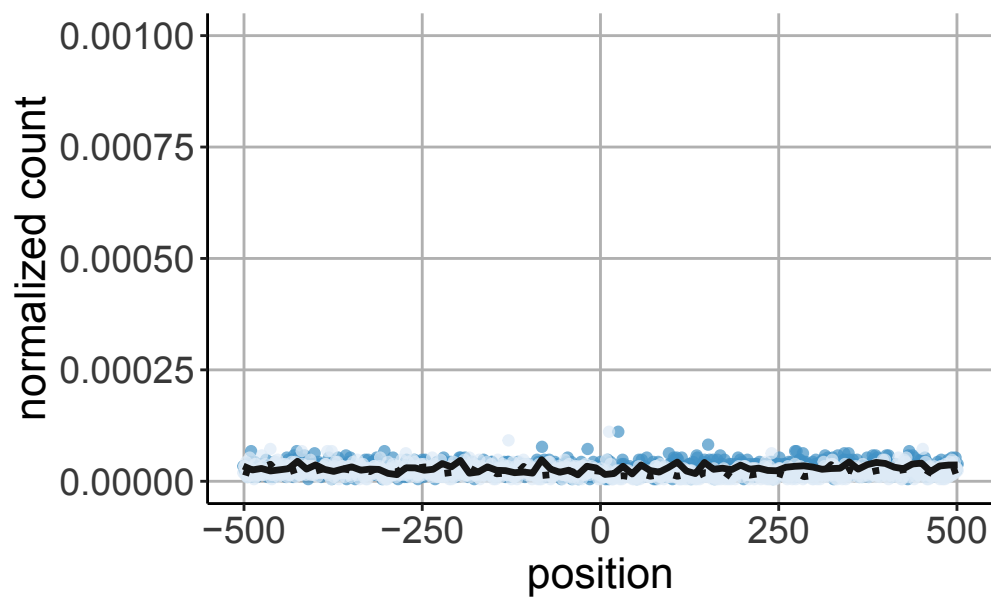

RBFOX3-GUWGCAUGUG

• antisense — sense    • antisense • sense

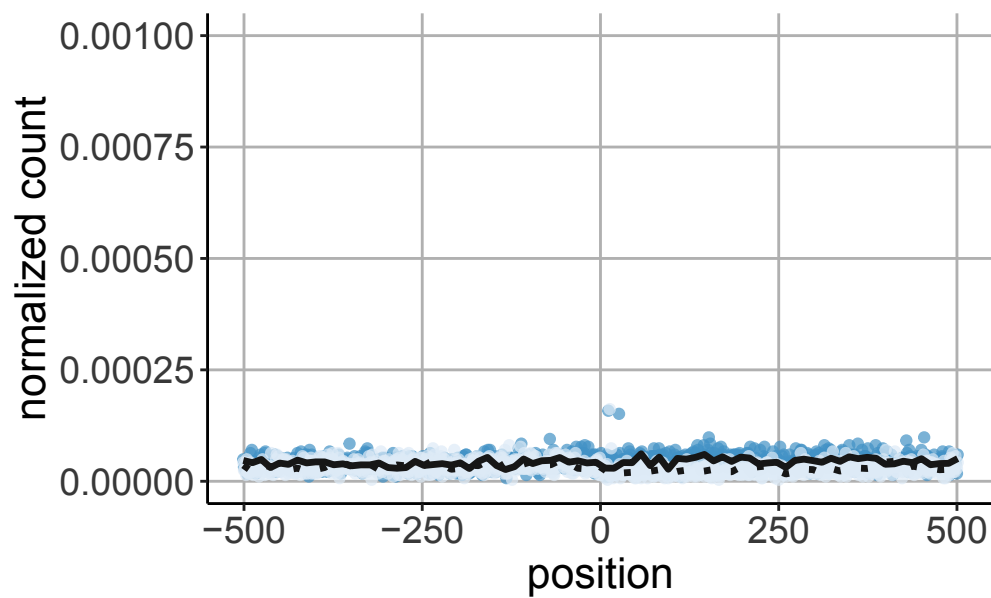

RBM4-KGUUGCGCGGG

• antisense — sense    • antisense • sense

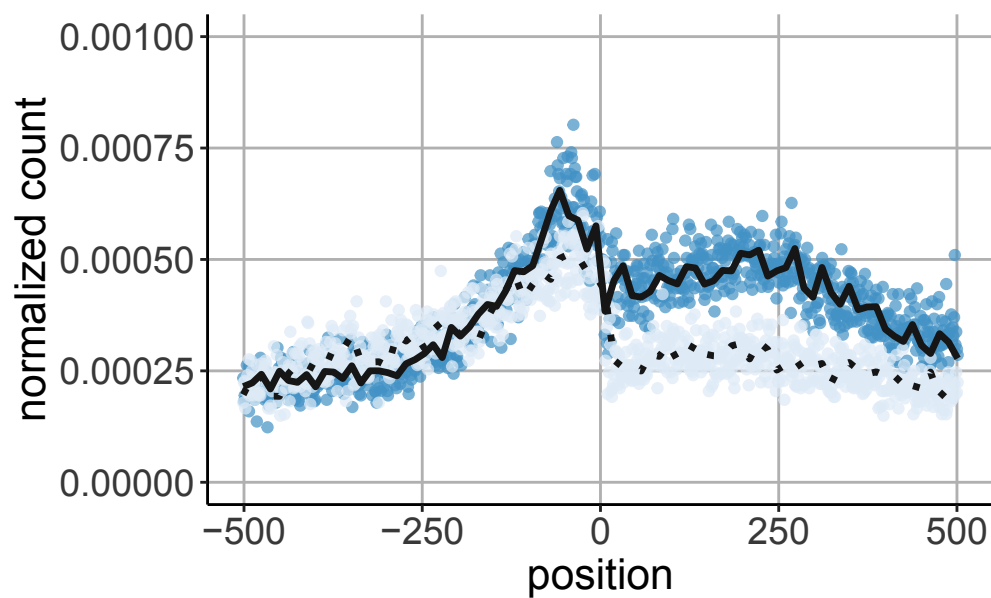

RBM4-UGAGUGCGGUAG

• antisense — sense    • antisense • sense

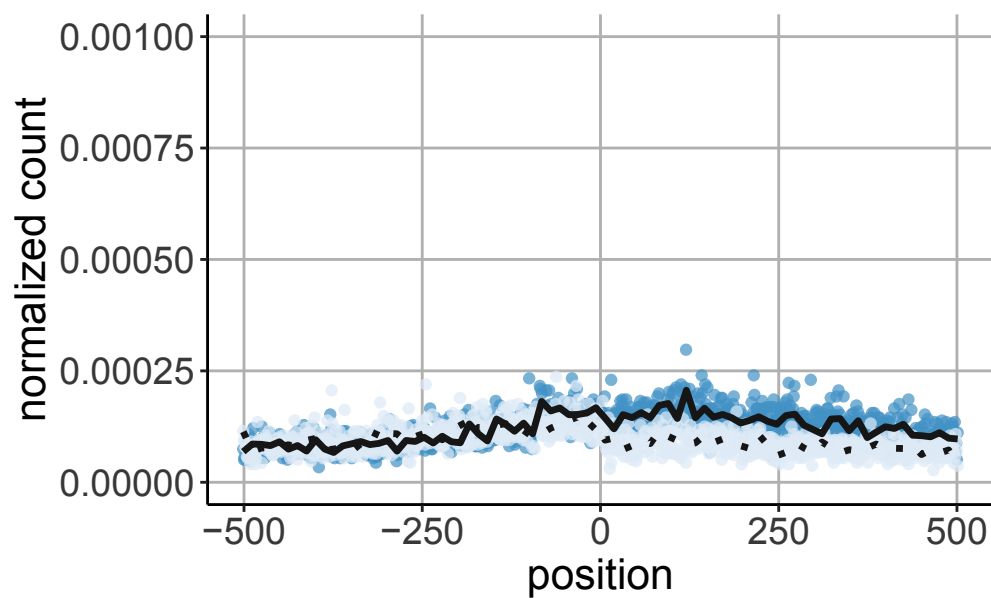

RBM4B-KGUUGCGCGGG

• antisense — sense    • antisense • sense

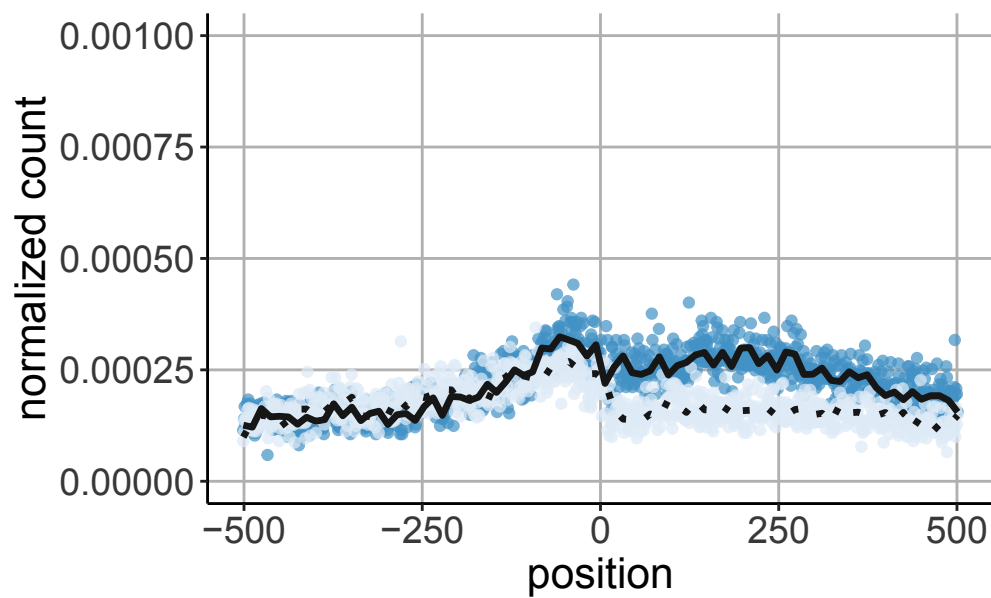

RBM4B-UGAGUGCGGUAG

• antisense — sense    • antisense • sense

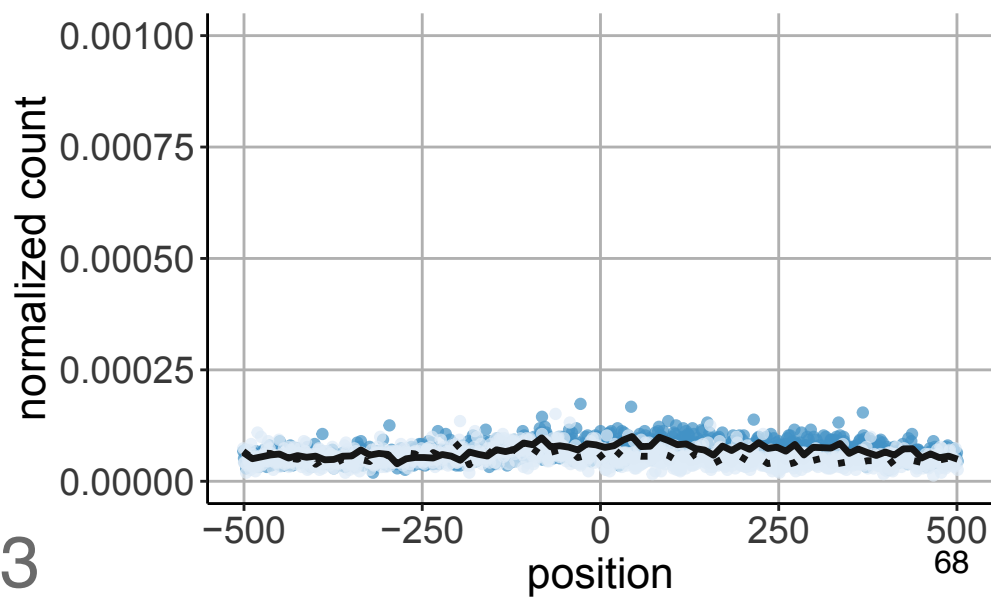

TSS

RBM6-YRCGCUCCUNGCY

• antisense — sense    • antisense • sense

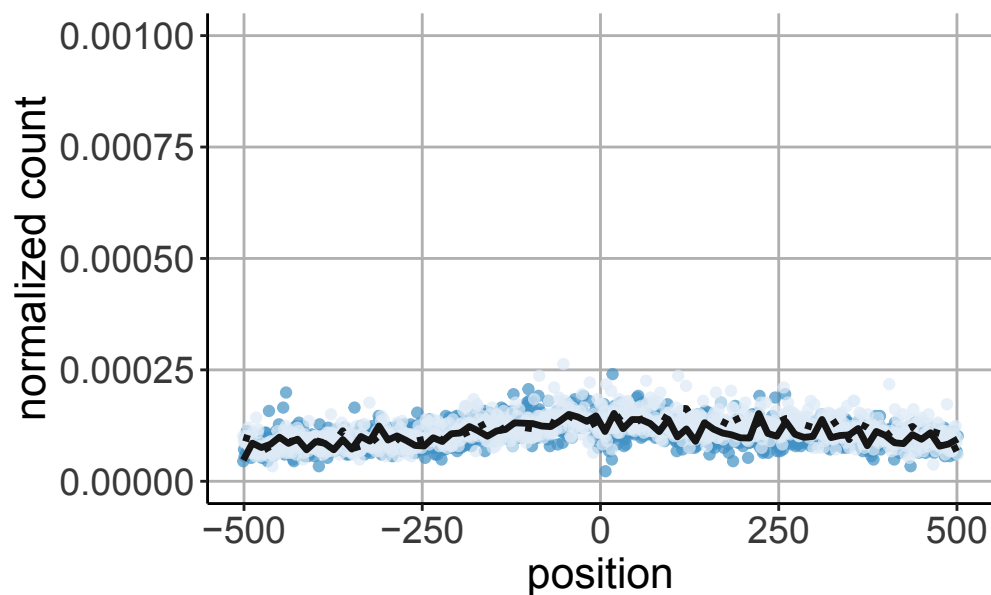

RBM6-YRYGCUCGUGGCYN

• antisense — sense    • antisense • sense

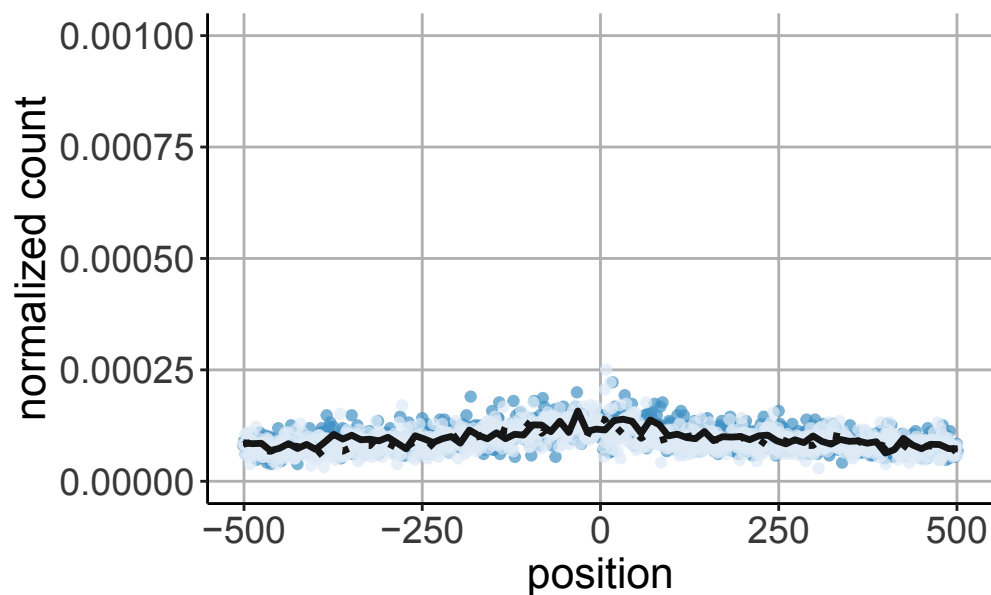

RBMS1-SGUGCAUAAKGCN

• antisense — sense    • antisense • sense

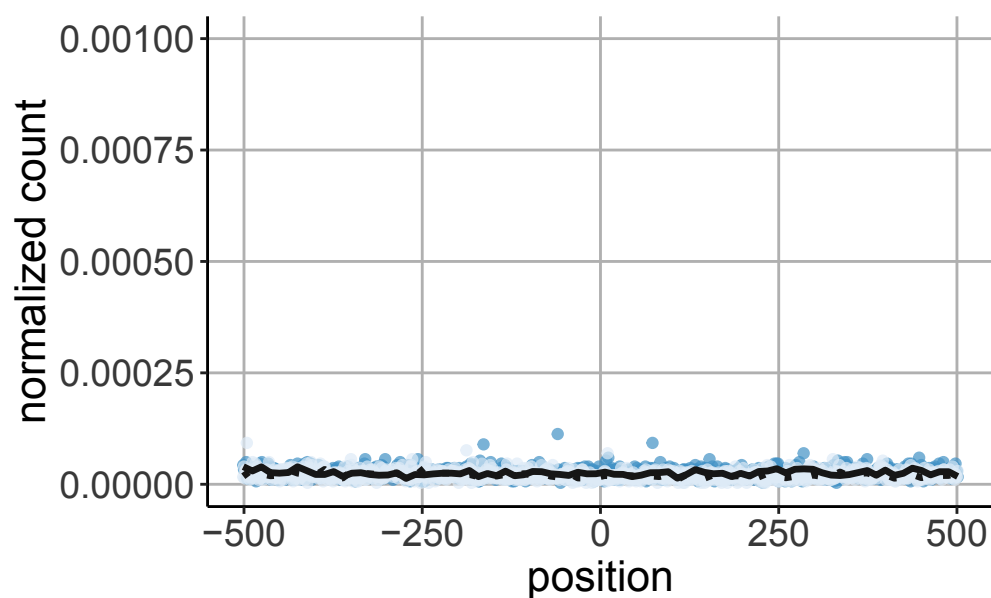

RBMS2-NUGCAUAAUGN

• antisense — sense    • antisense • sense

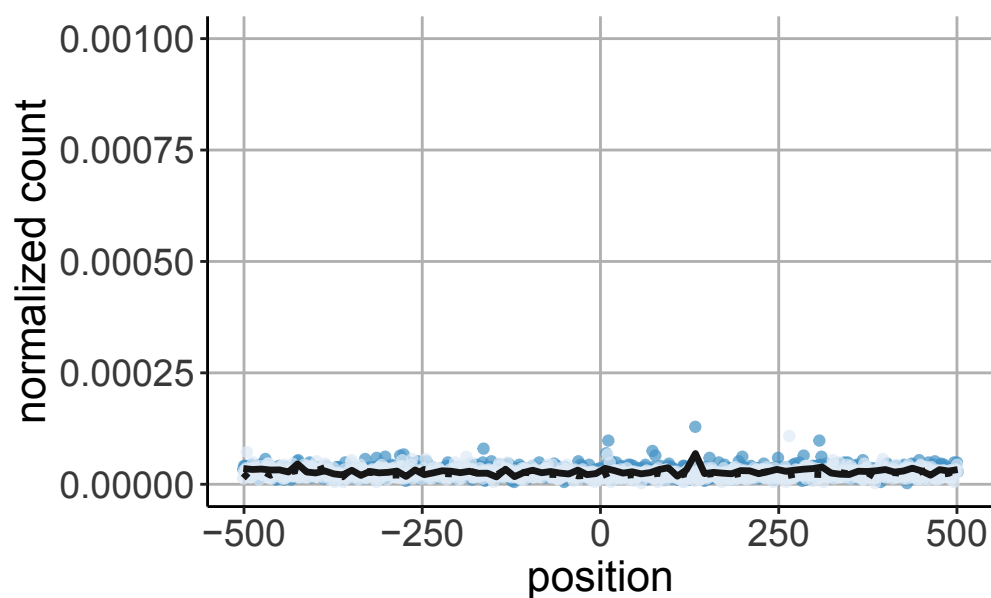

RBMS3-NUGCAUAAUGN

• antisense — sense    • antisense • sense

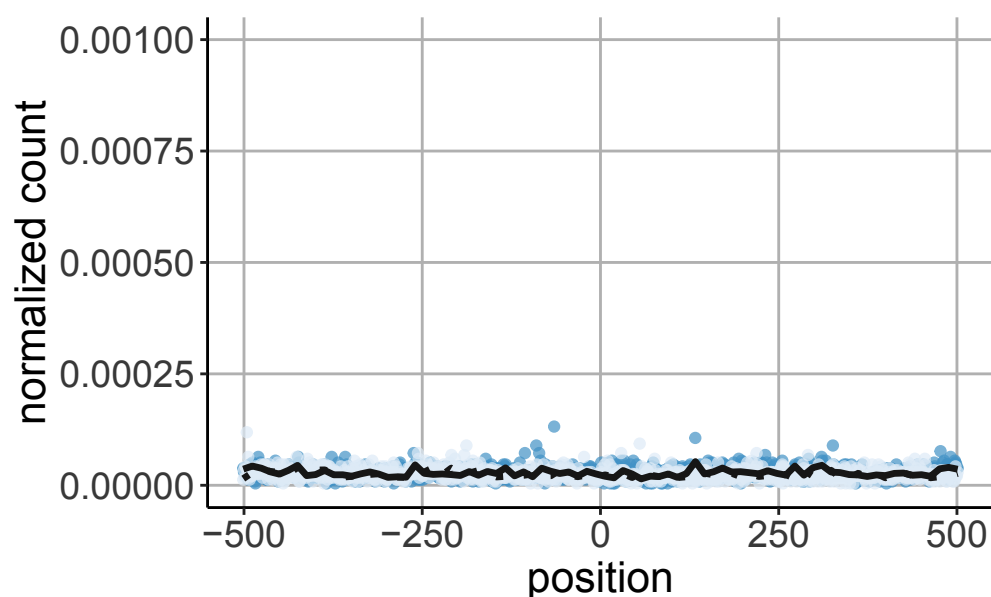

RBMS3-SAUGYAURAKKUG

• antisense — sense    • antisense • sense

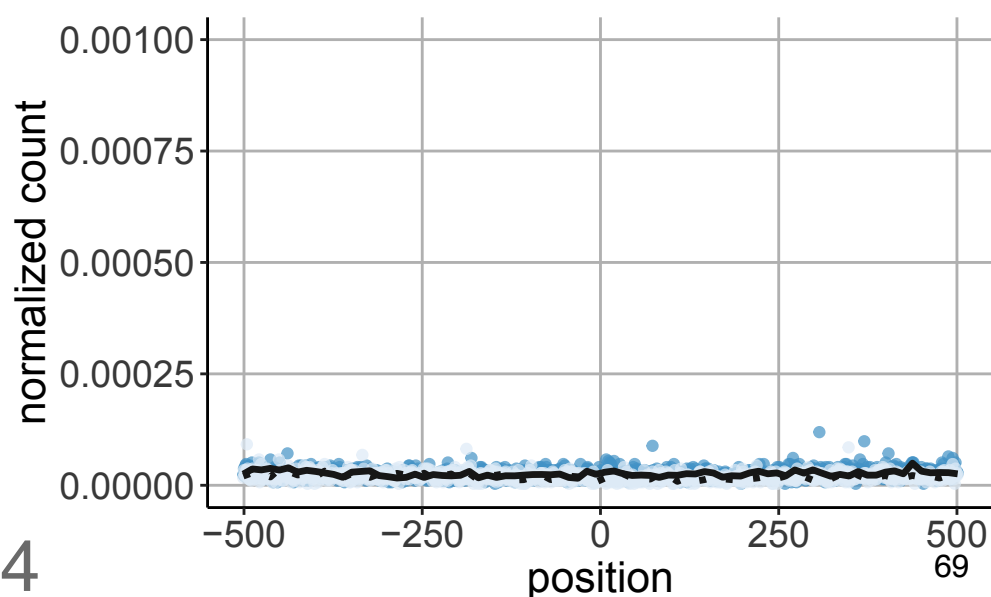

TSS

RBM1E-NGCUUCGNGCN

• antisense — sense • antisense • sense

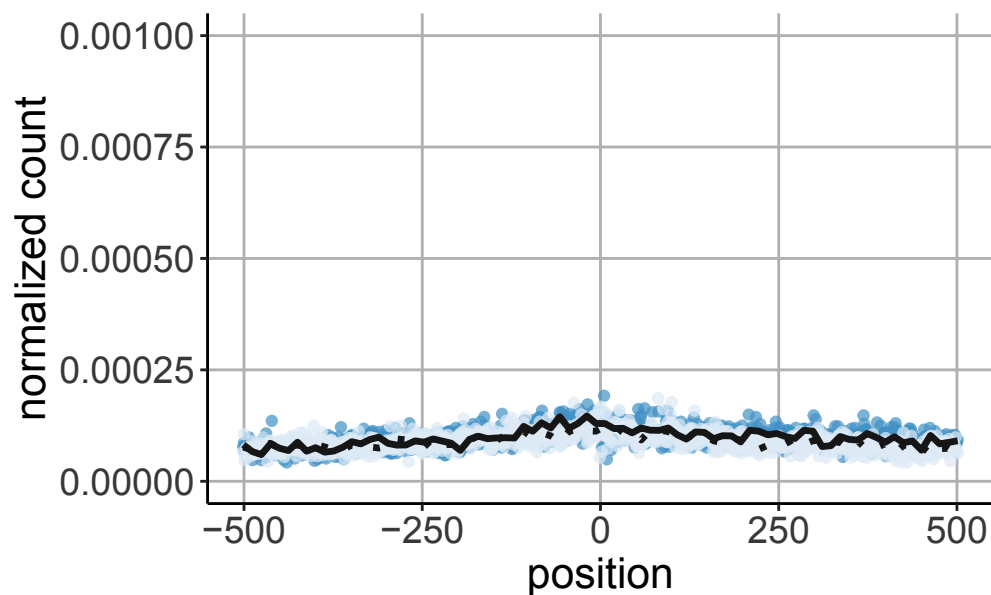

RBM1E-NAGCUUNGUGCUN

• antisense — sense • antisense • sense

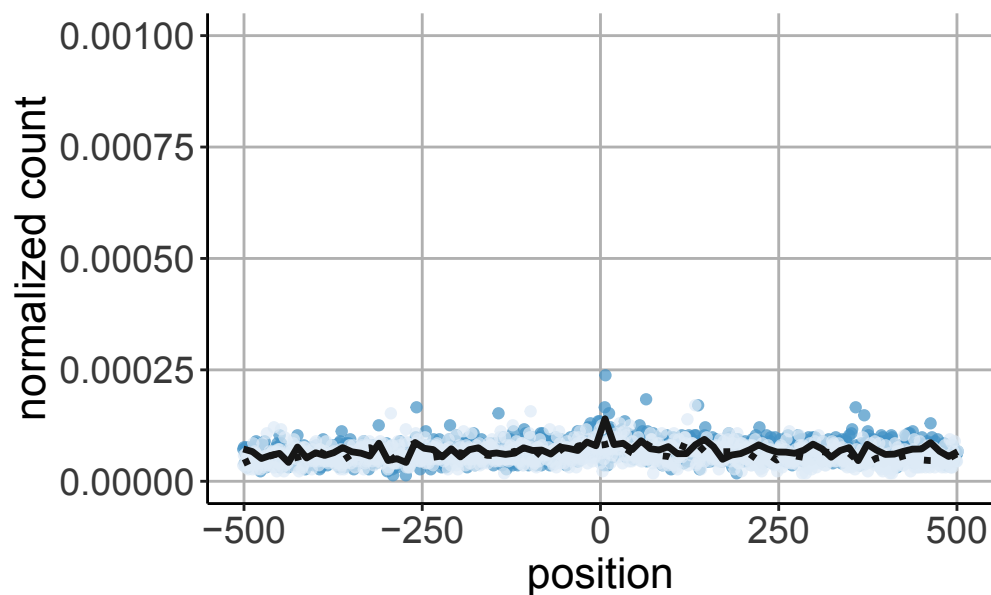

RBM1F-NGCCUCAAGGYN

• antisense — sense • antisense • sense

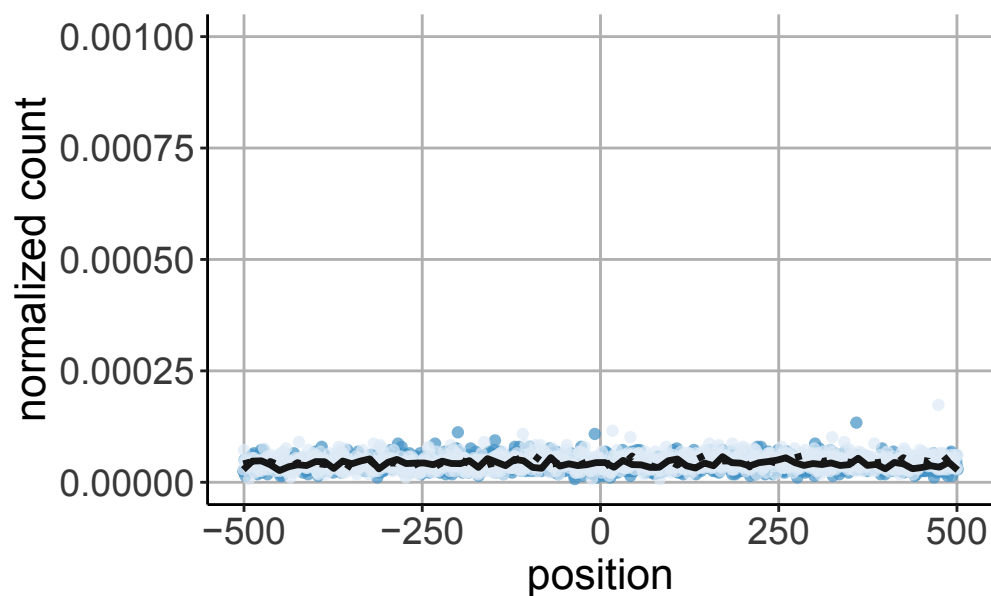

RBM1F-GCGCAAGAGC

• antisense — sense • antisense • sense

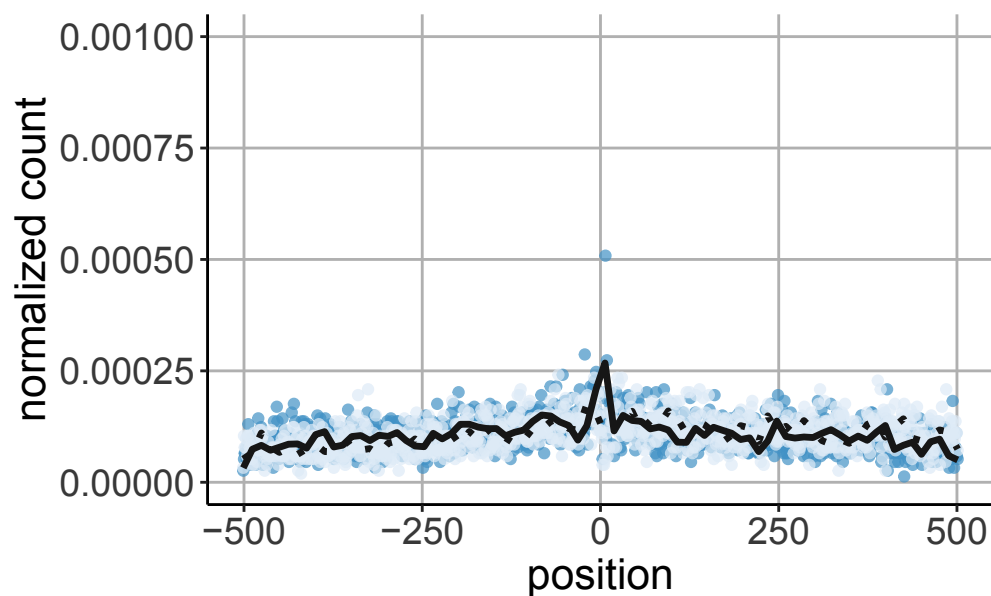

RBM1J-NGCCUCAAGGYN

• antisense — sense • antisense • sense

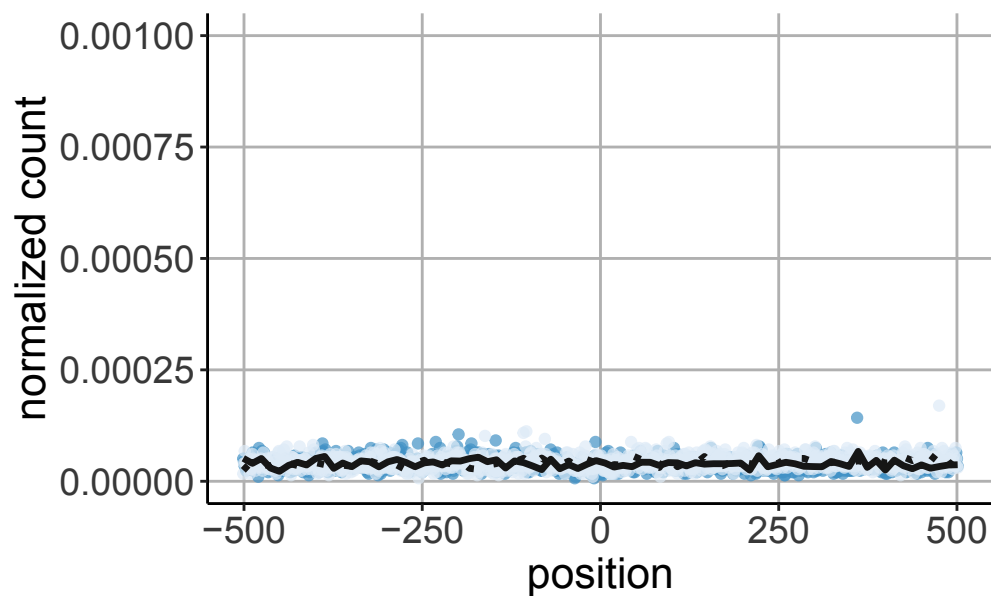

RBM1J-GCGCAAGAGC

• antisense — sense • antisense • sense

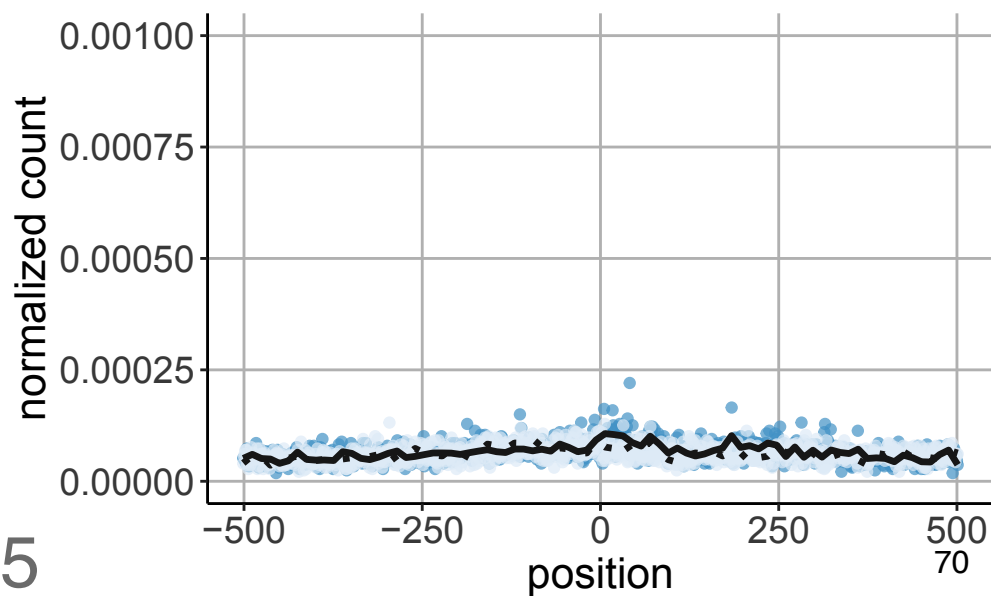

5

70

TSS

RBM1J-NGCGUCGUGGCN

• antisense — sense • antisense • sense

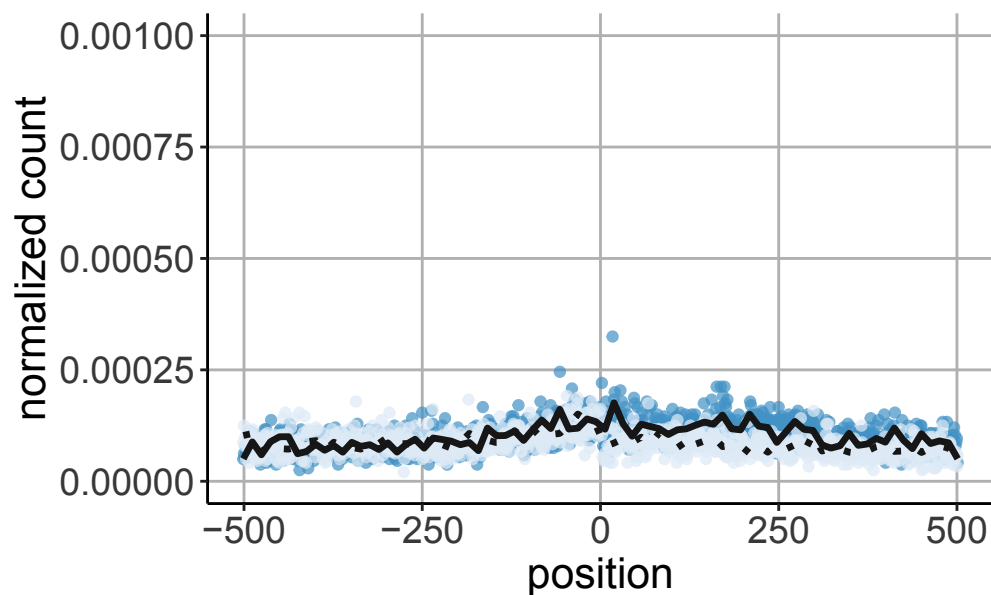

RBM1J-UGAAUUCGUCN

• antisense — sense • antisense • sense

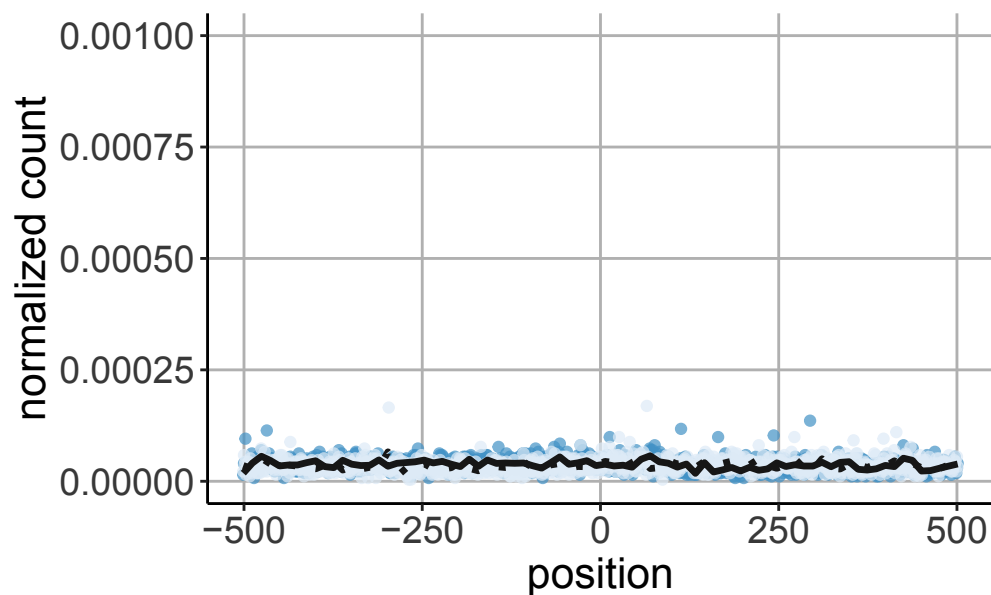

RC3H1\_2-YRCGUUUUAGKR

• antisense — sense • antisense • sense

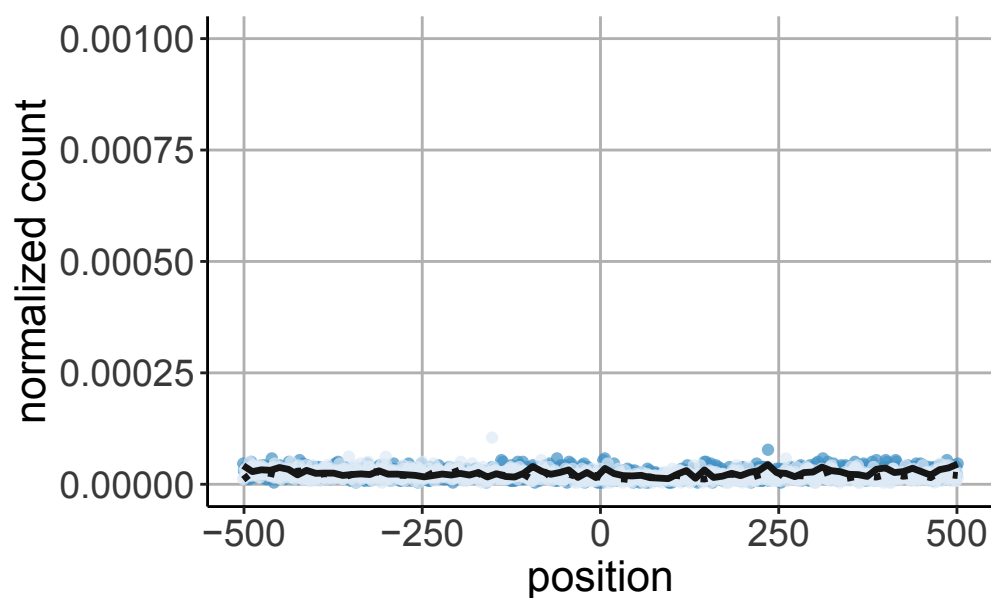

RC3H2-CURCGUUUUAGKAG

• antisense — sense • antisense • sense

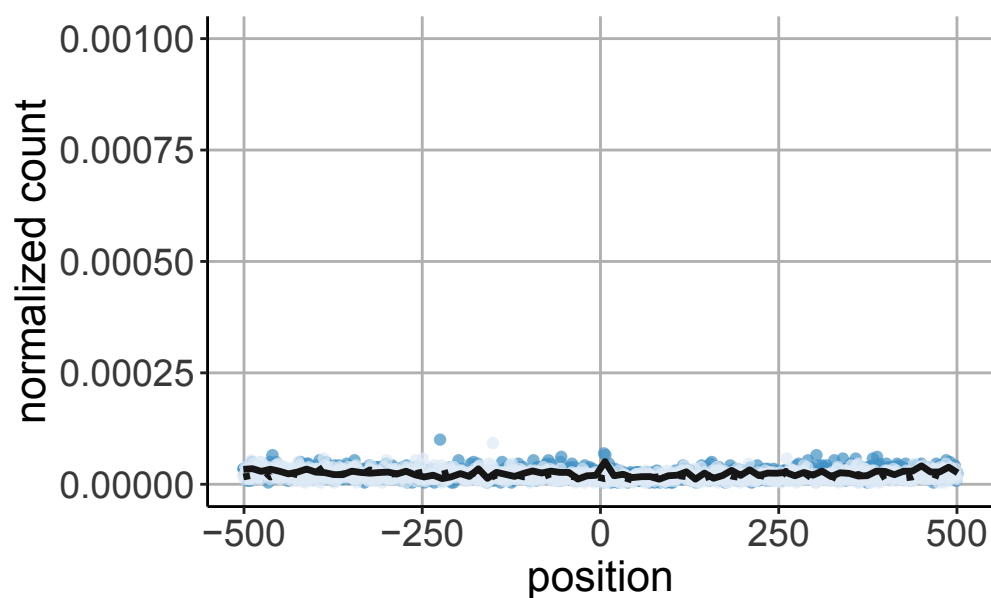

RC3H2-CUCGUAUCGAG

• antisense — sense • antisense • sense

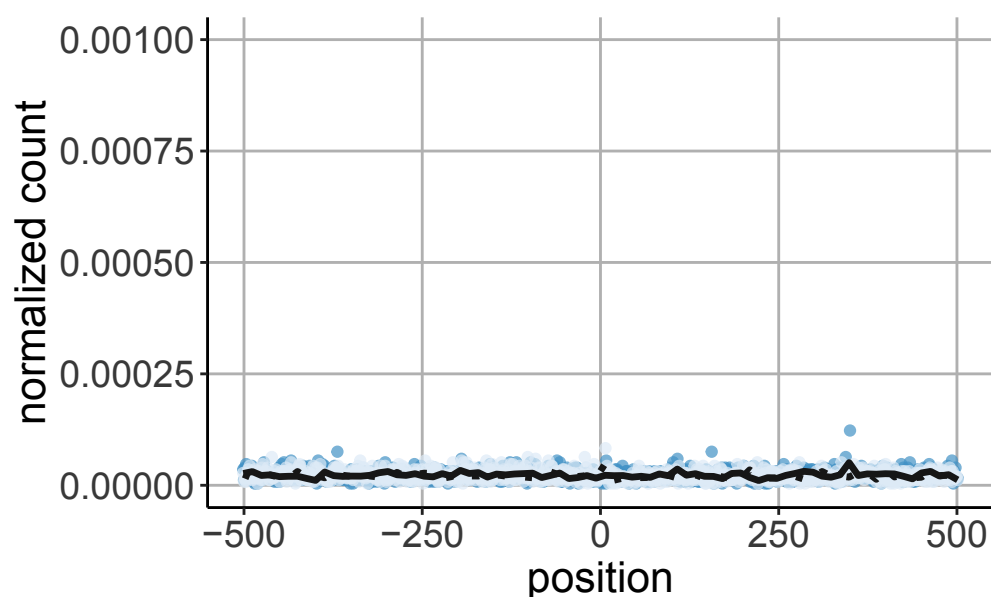

RC3H2-CCUCUNUGAGG

• antisense — sense • antisense • sense

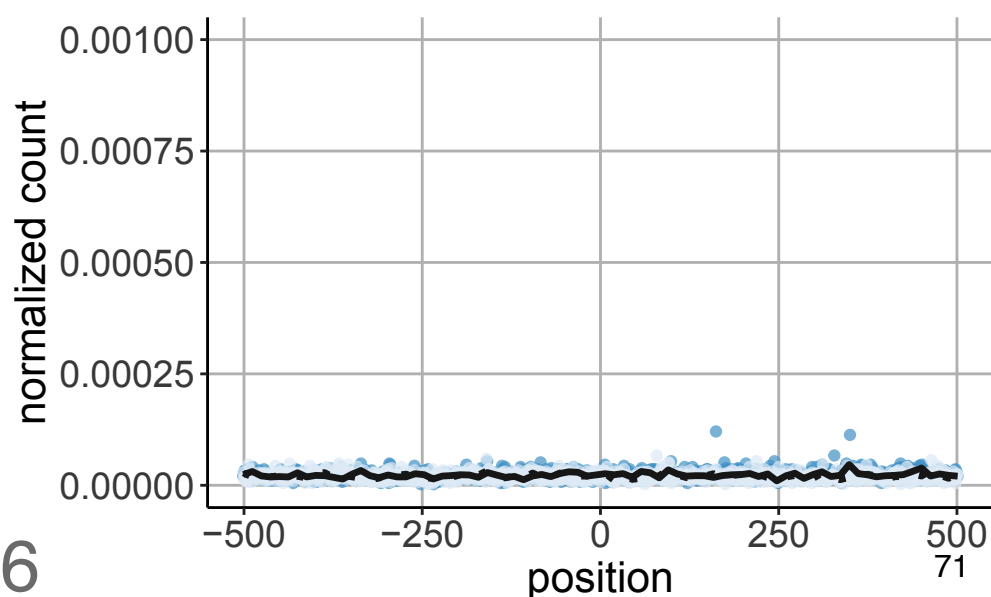



TSS

RNPC3-GCAGUKUUAGGGY

• antisense — sense    • antisense • sense

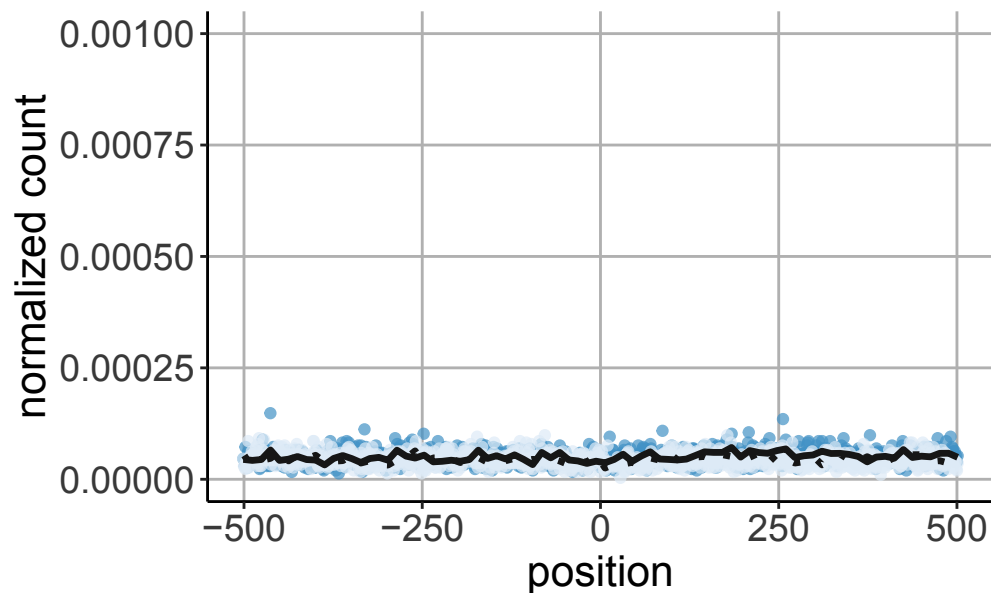

YBX1-RCCAYRHCAUCGY

• antisense — sense    • antisense • sense

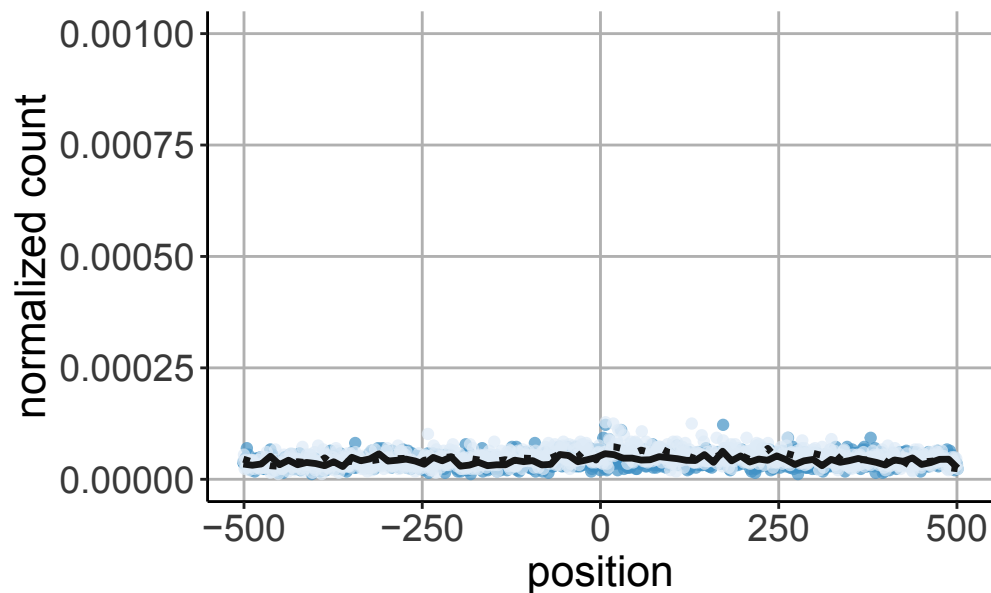

ZC3H12A-NGCAGGUAAGUGCN

• antisense — sense    • antisense • sense

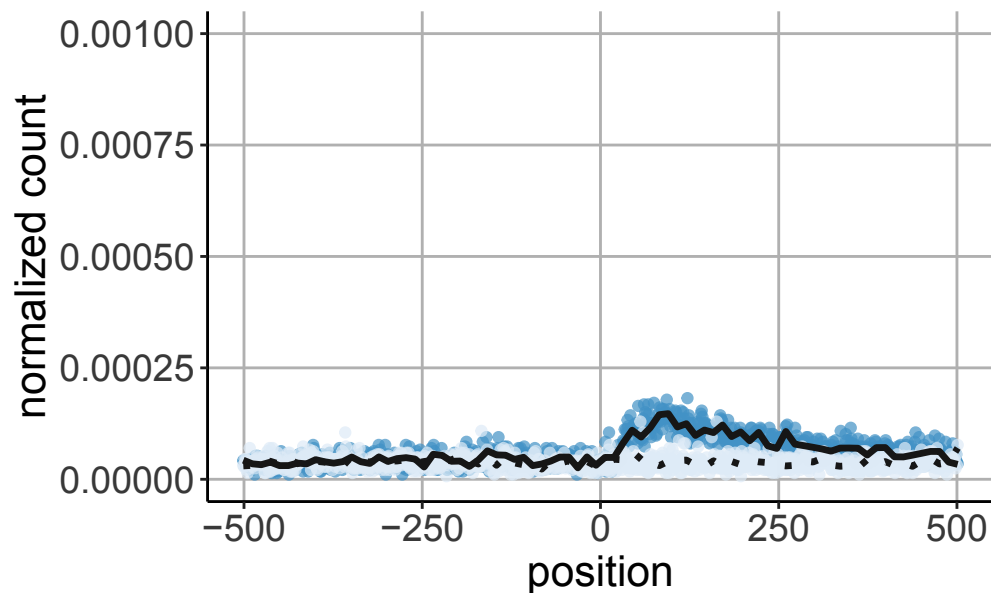

ZC3H12B-NGCAGGUAAGUGSN

• antisense — sense    • antisense • sense

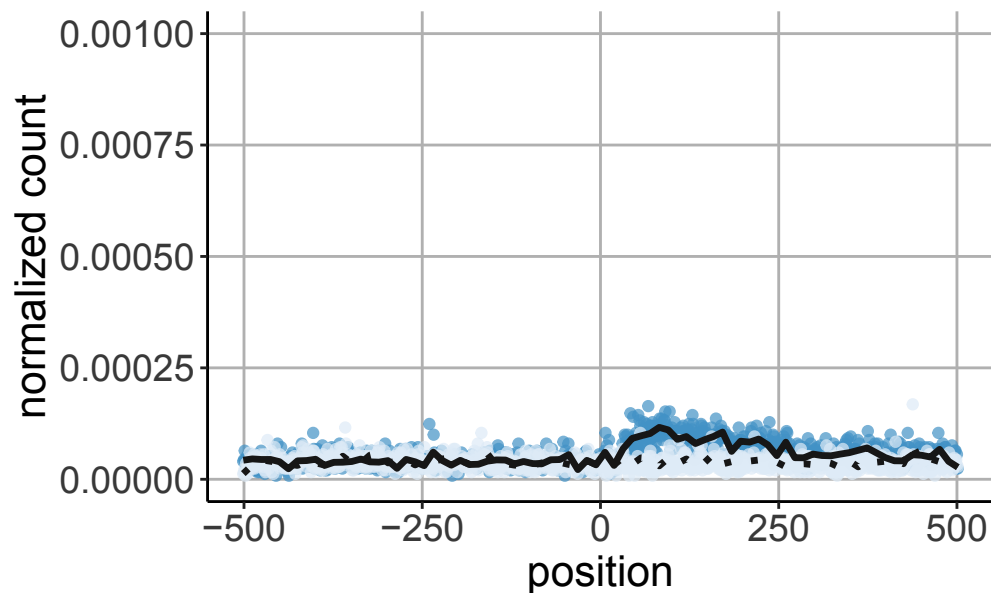

ZC3H12B-SCAGGUAUUAUGS

• antisense — sense    • antisense • sense

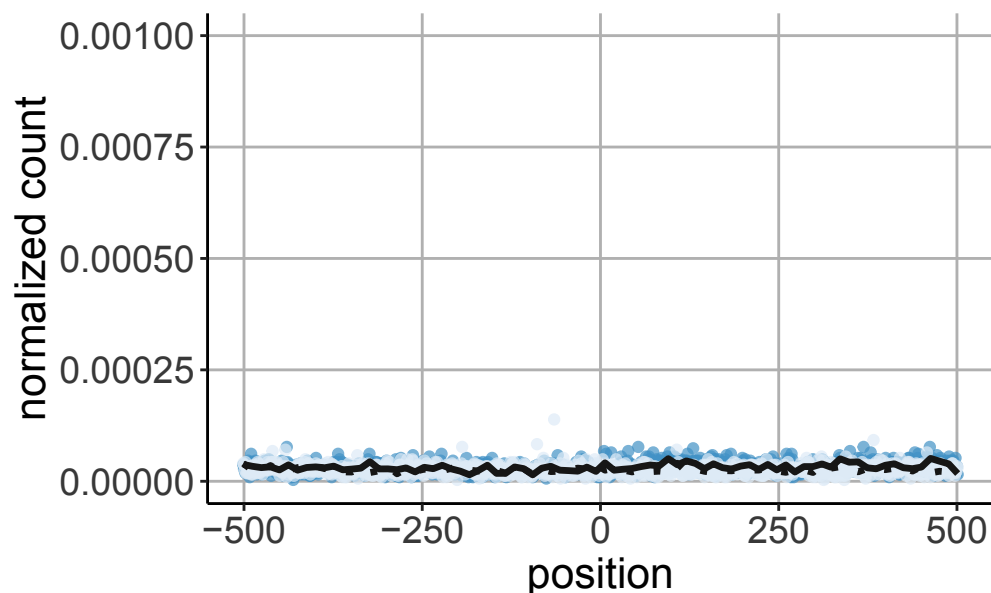

start codon

ZC3H8-GCUUGC

▪ antisense — sense    • antisense • sense

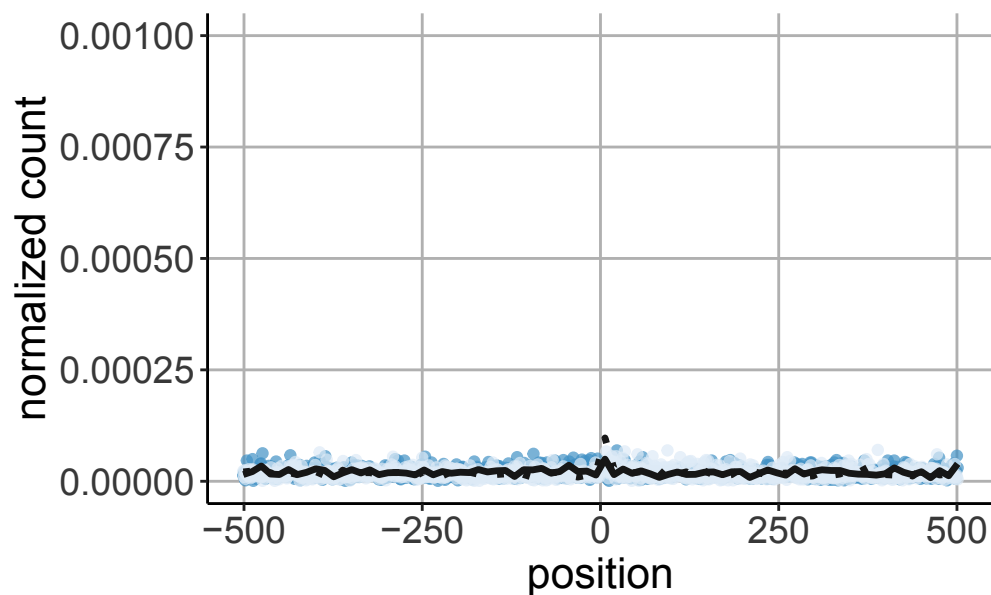

ESRP1\_3-GGUGUUGGUG

▪ antisense — sense    • antisense • sense

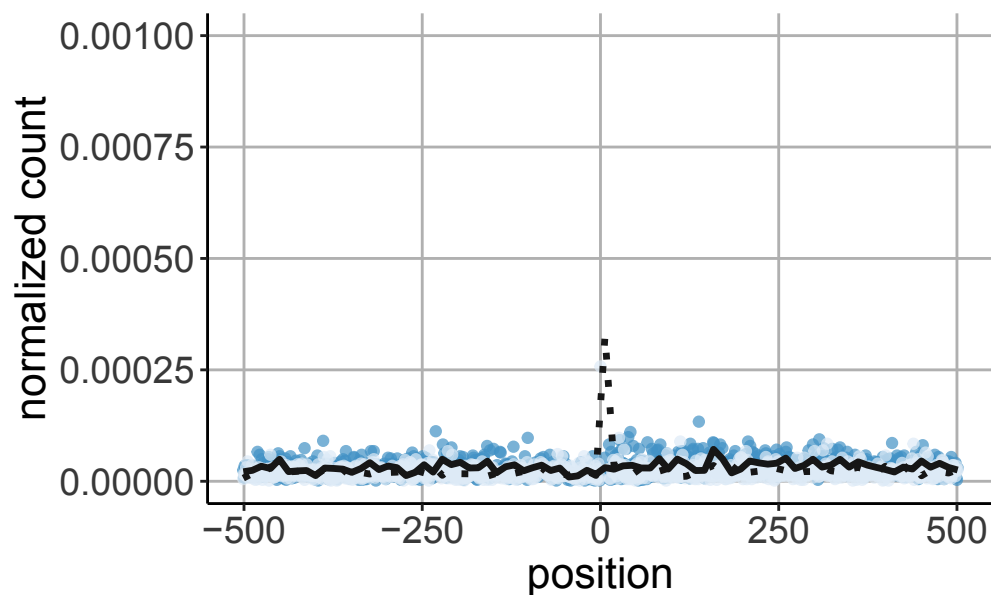

ELAVL3-GUUUUUG

▪ antisense — sense    • antisense • sense

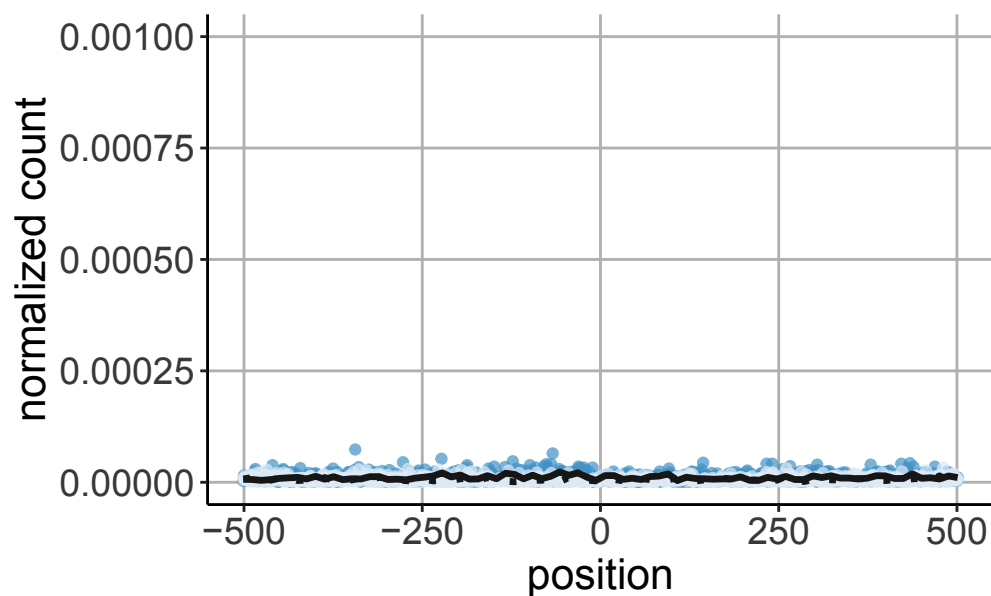

PUM1-NUGUAAAUAG

▪ antisense — sense    • antisense • sense

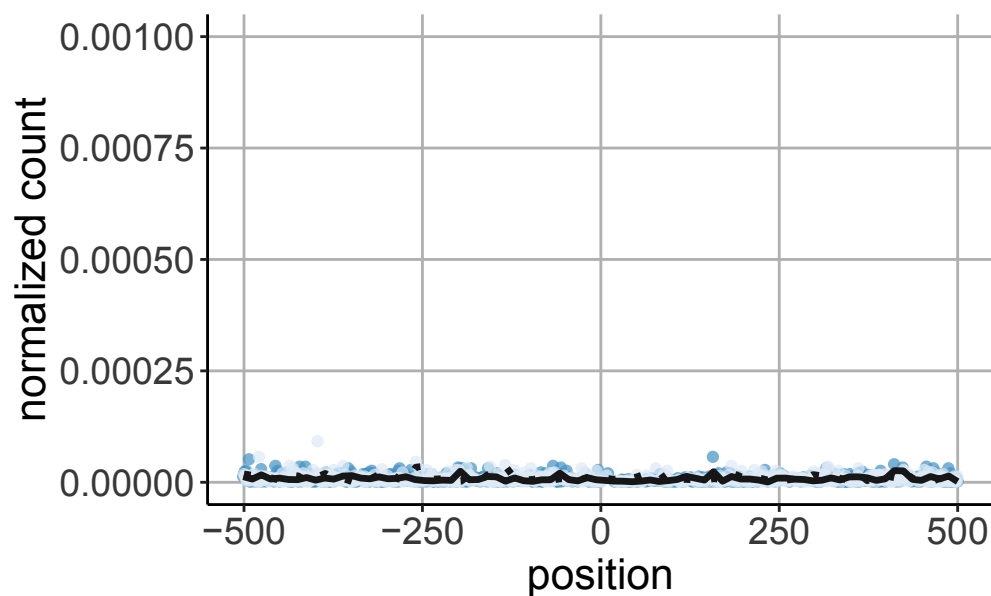

QKI-NUACUAACAWN

▪ antisense — sense    • antisense • sense

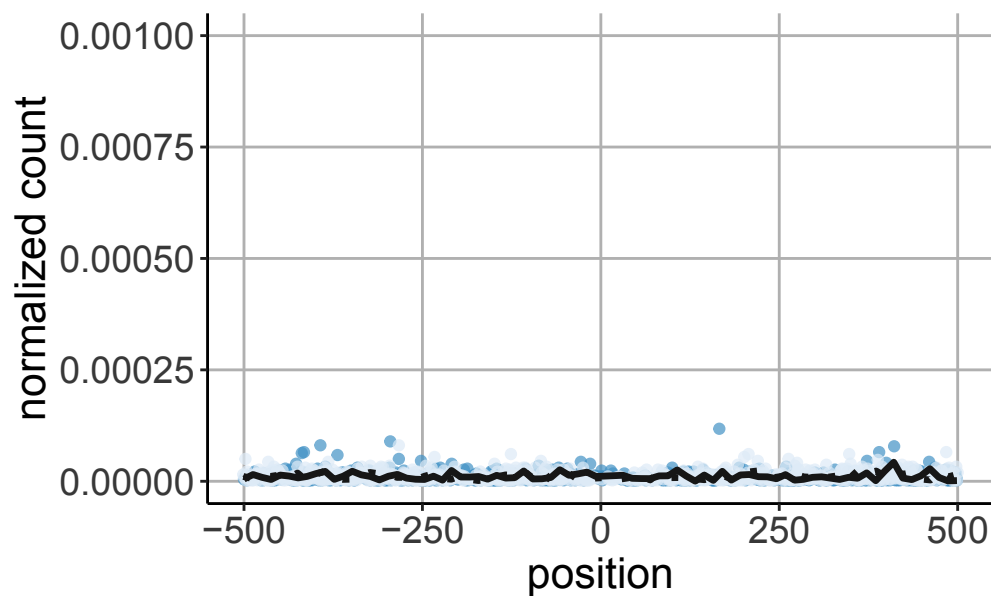

MCM3AP-CGCCAGUGCG

▪ antisense — sense    • antisense • sense

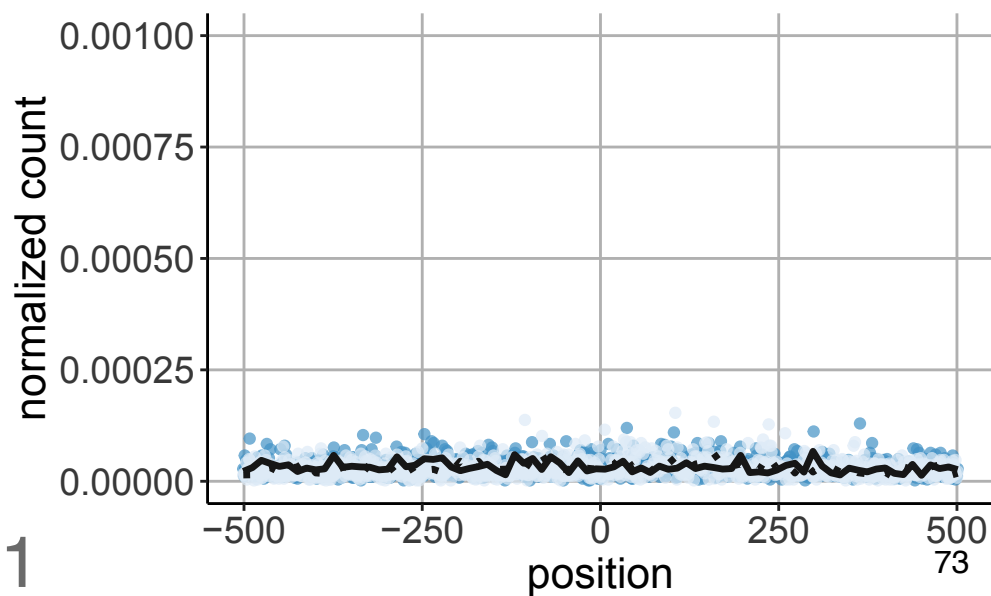

1

73

### HNRNPC-UUUUUGGUGG

start codon

▪ antisense — sense    • antisense • sense

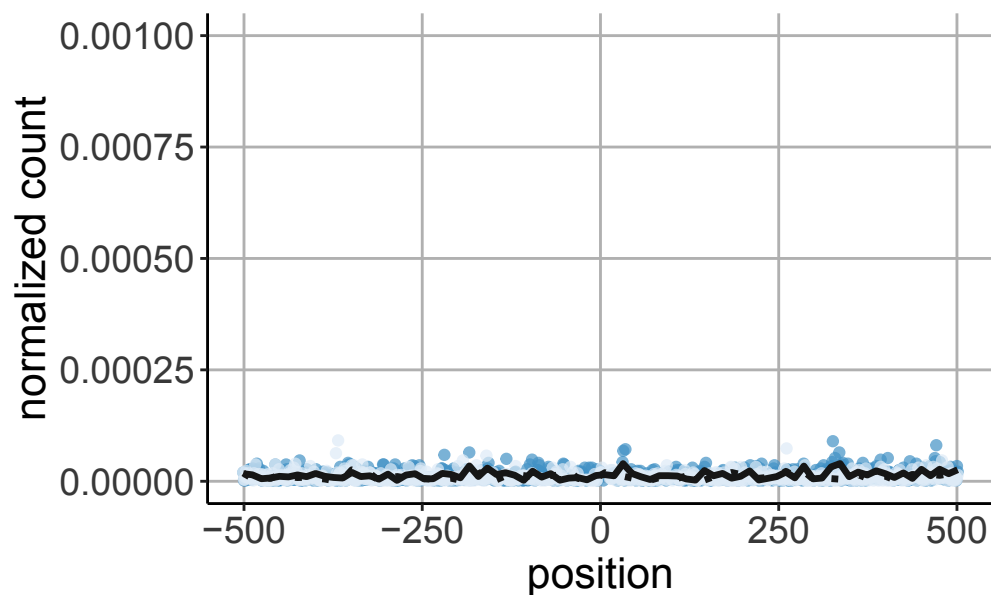

### PABPC5-NUAKAAAKUURCN

▪ antisense — sense    • antisense • sense

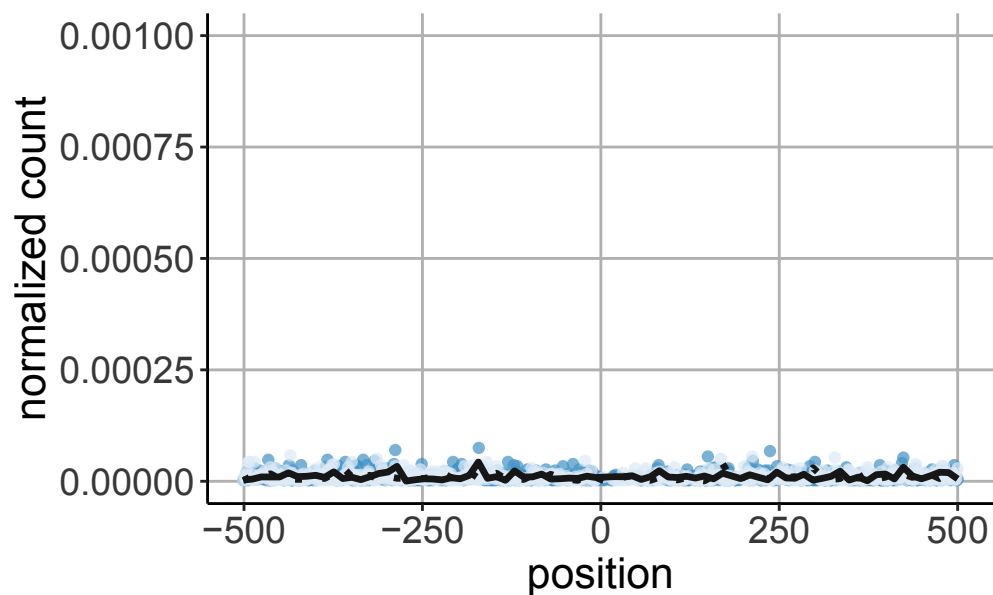

### PABPC5-NUAKAAAUUACUACAN

▪ antisense — sense    • antisense • sense

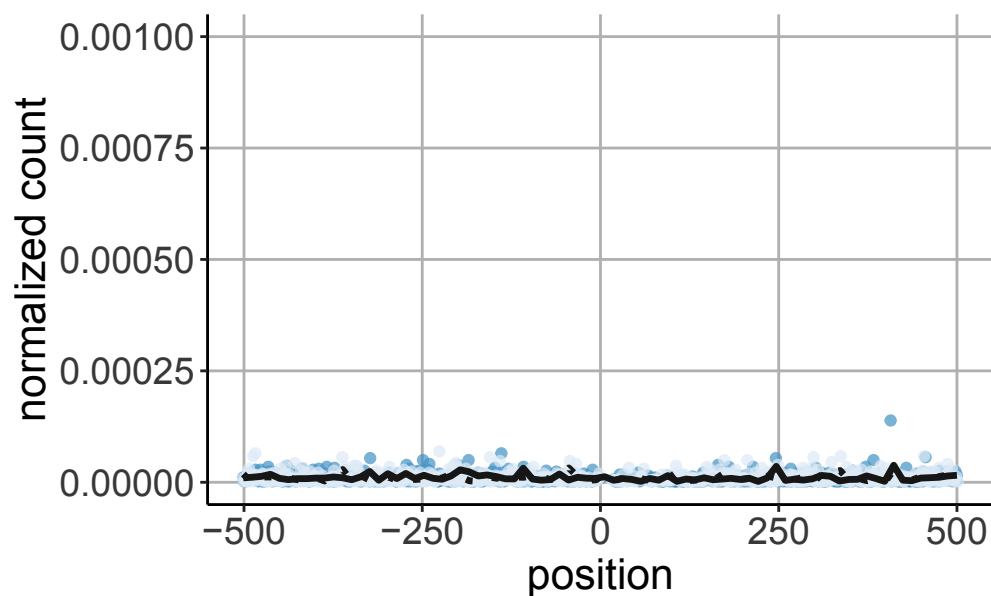

### LARP7\_4-GRUCGUGAUGN

▪ antisense — sense    • antisense • sense

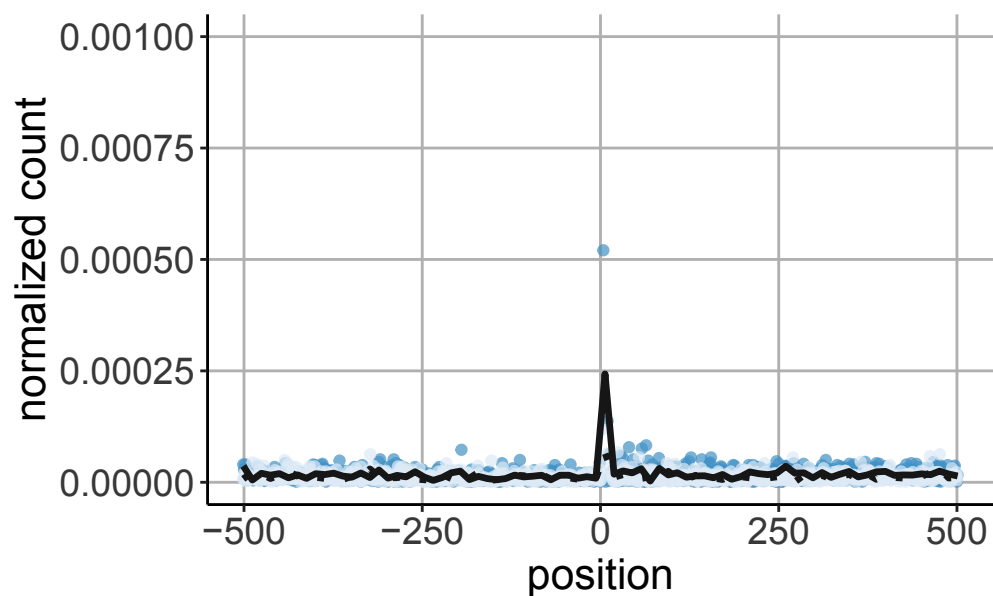

### ZCRB1-GUAUUAAGGG

▪ antisense — sense    • antisense • sense

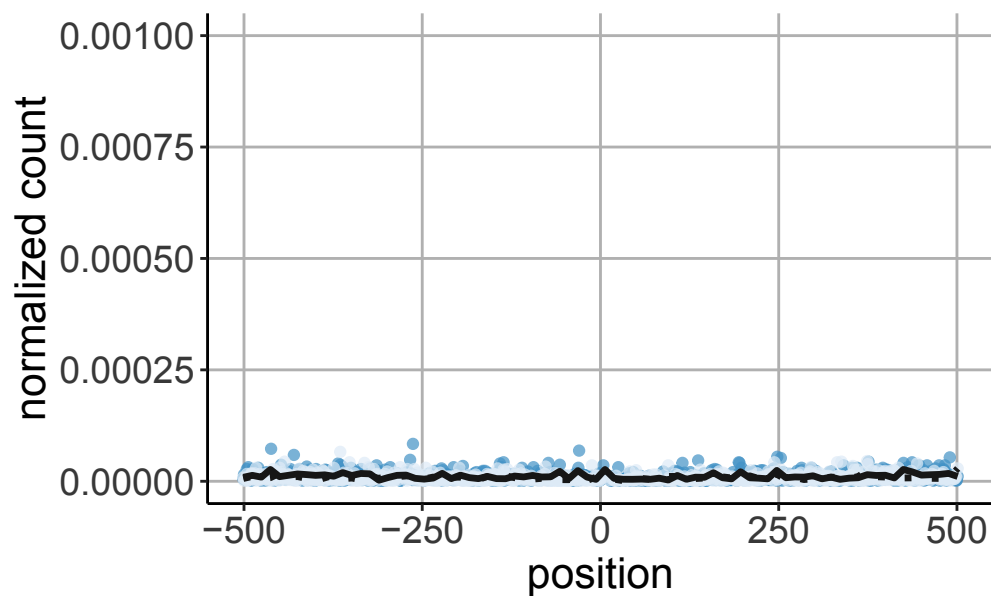

### ZCRB1-GUGGACUUAANN

▪ antisense — sense    • antisense • sense

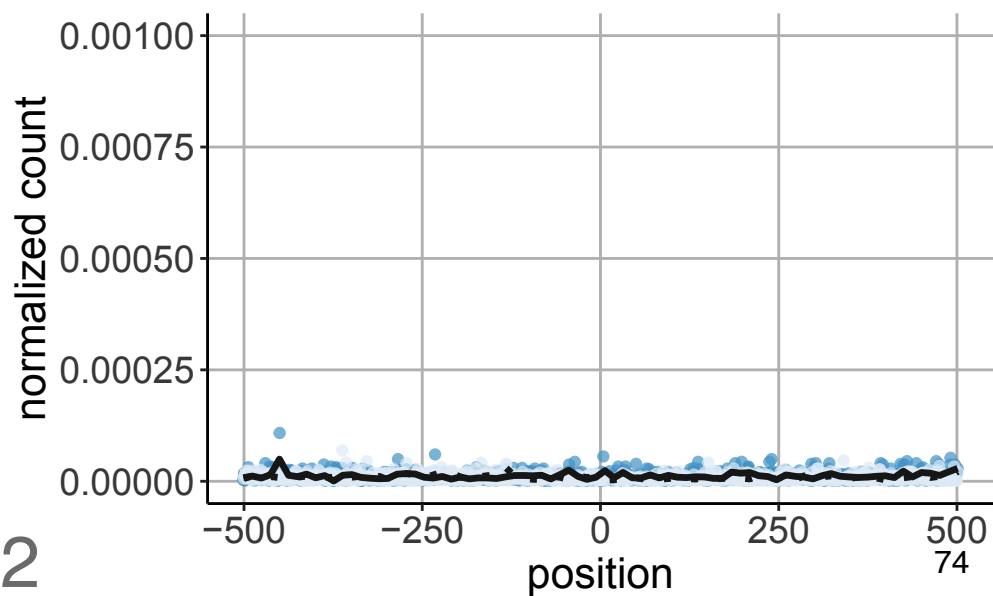

RBM42-NGGAACUAAN

start codon

▪ antisense — sense    • antisense • sense

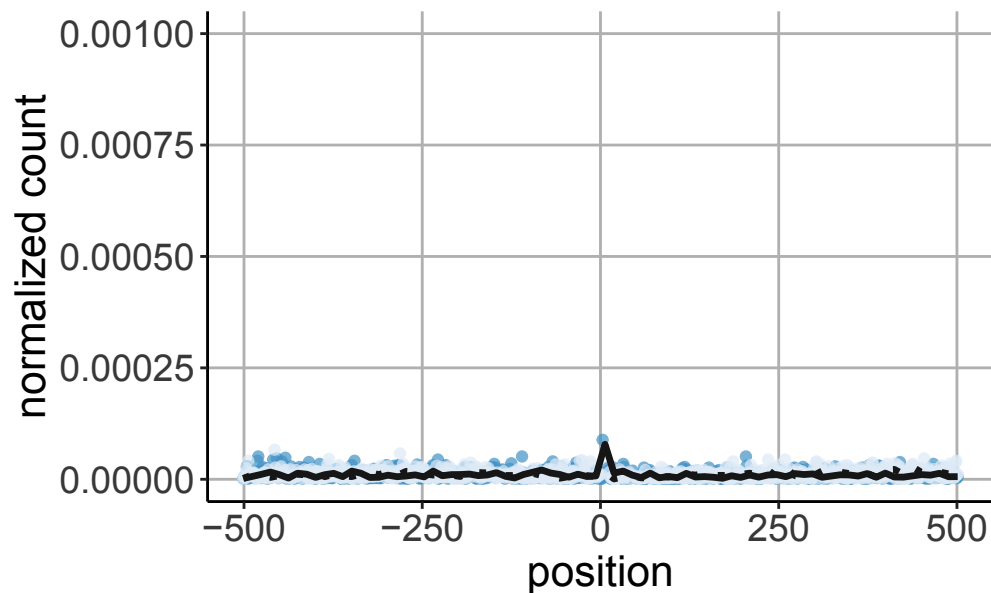

KHDRBS1-UAAUAGN

▪ antisense — sense    • antisense • sense

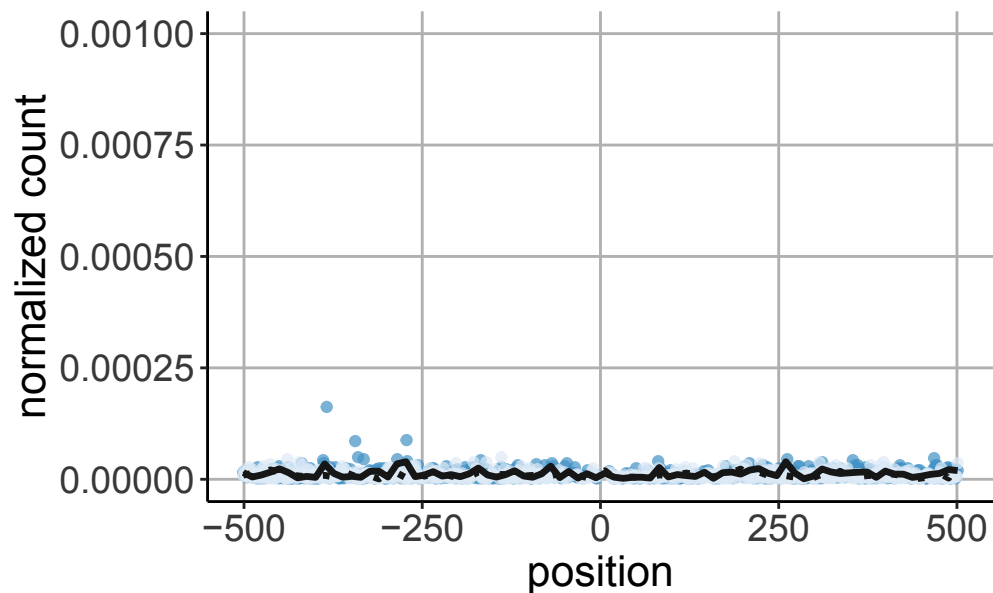

HNRNPCL1-GUUUUUUGGG

▪ antisense — sense    • antisense • sense

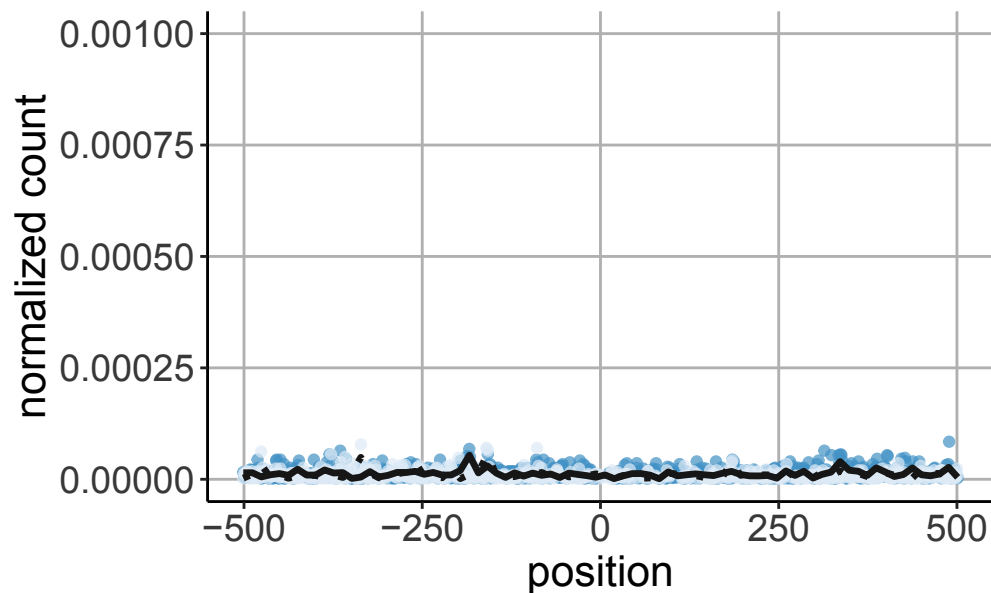

ZFR\_4-GUGACGGAUG

▪ antisense — sense    • antisense • sense

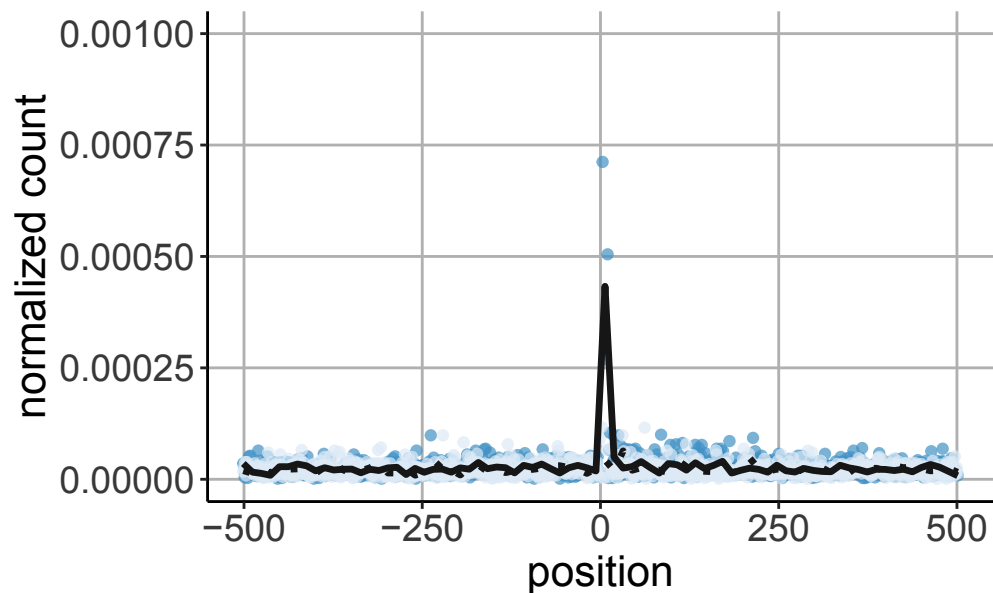

ZFR\_4-GUGC GGAUGN

▪ antisense — sense    • antisense • sense

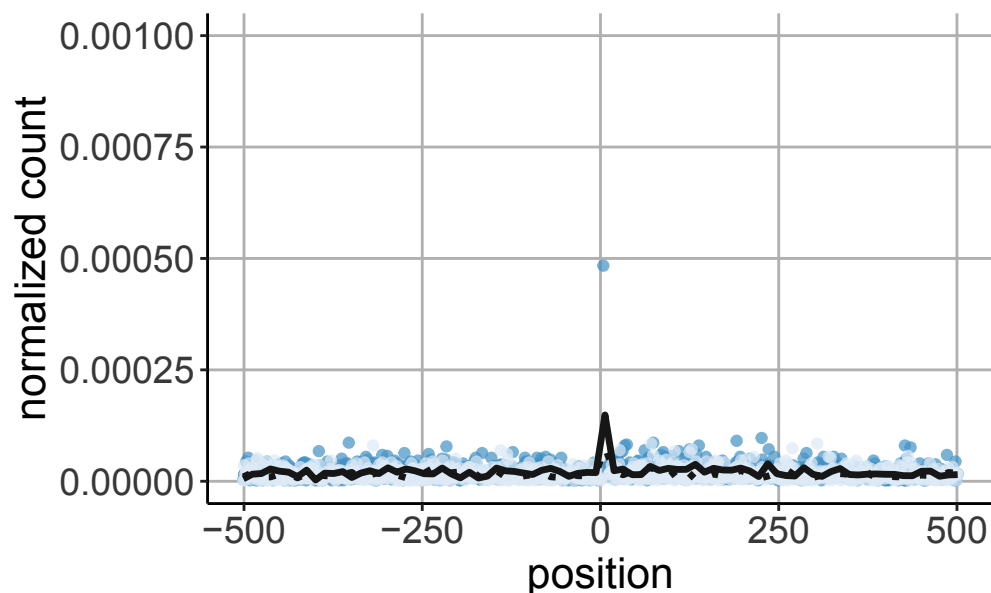

HNRPLL-GCAURCAYCC

▪ antisense — sense    • antisense • sense

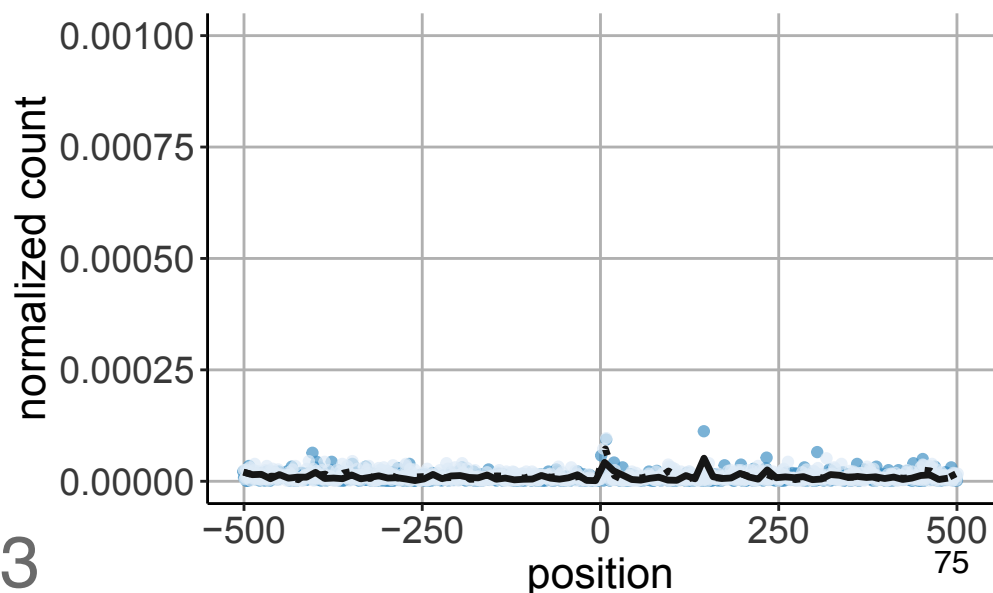

start codon ZC3H12C-NUGCGNCAGUCGGUAGC

▪ antisense — sense    • antisense • sense

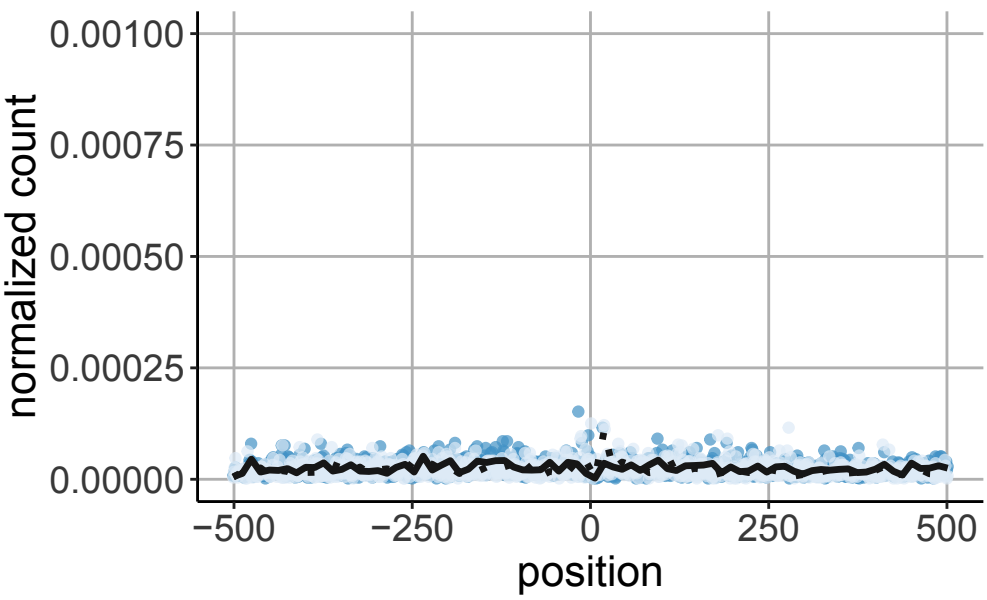

HNRNPL\_2-ACAUWWCAUW

▪ antisense — sense    • antisense • sense

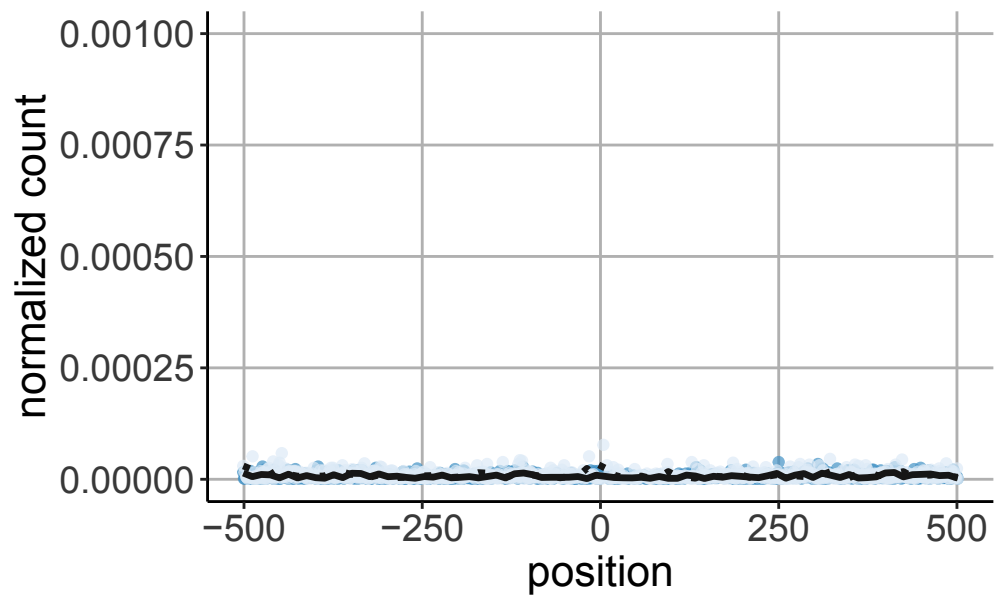

RBMS2-CAGUGAUUGG

▪ antisense — sense    • antisense • sense

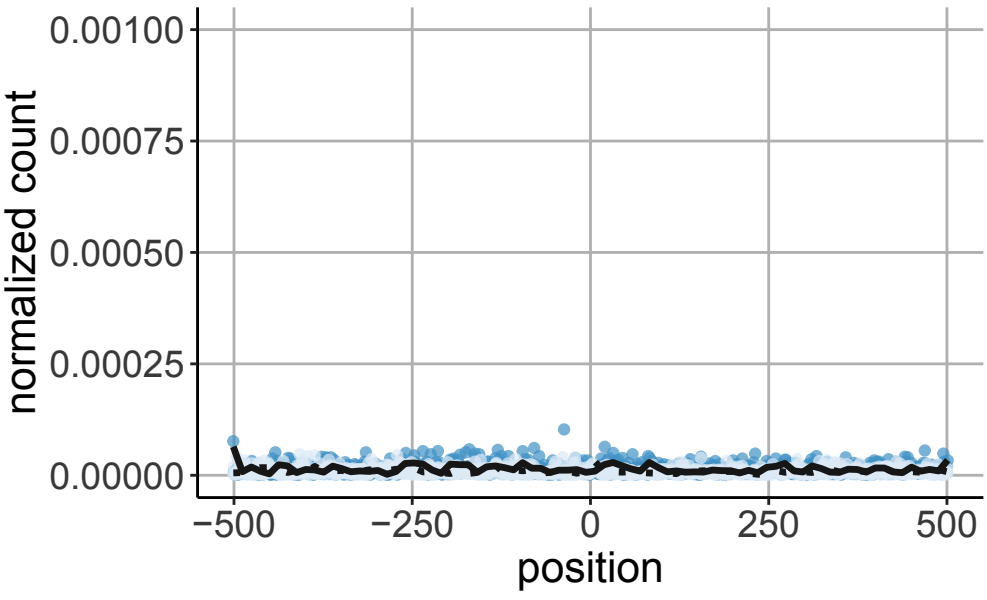

RBM14-GGKUGCGUCG

▪ antisense — sense    • antisense • sense

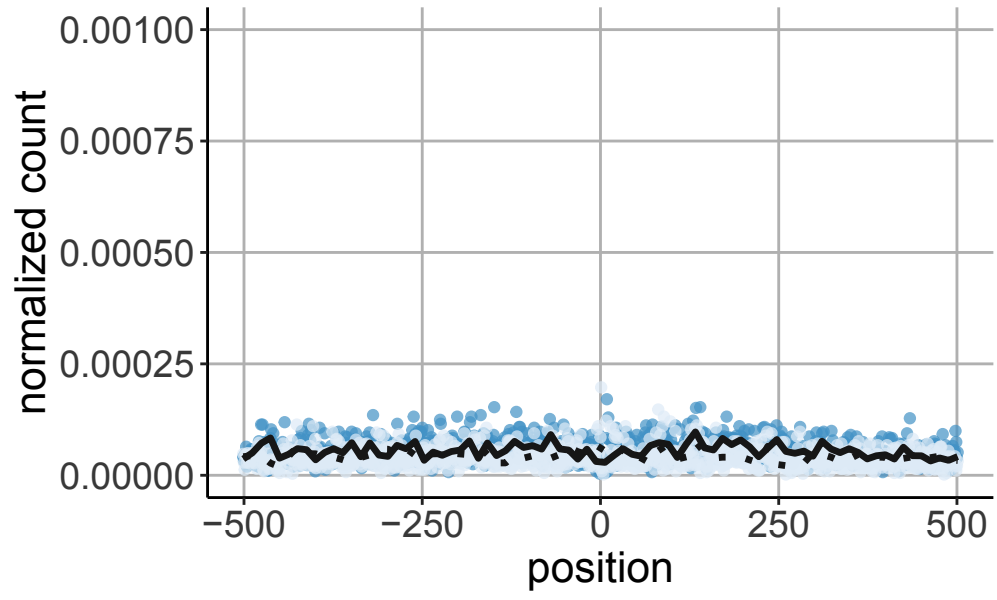

RBMS2-CGUAUAUAG

▪ antisense — sense    • antisense • sense

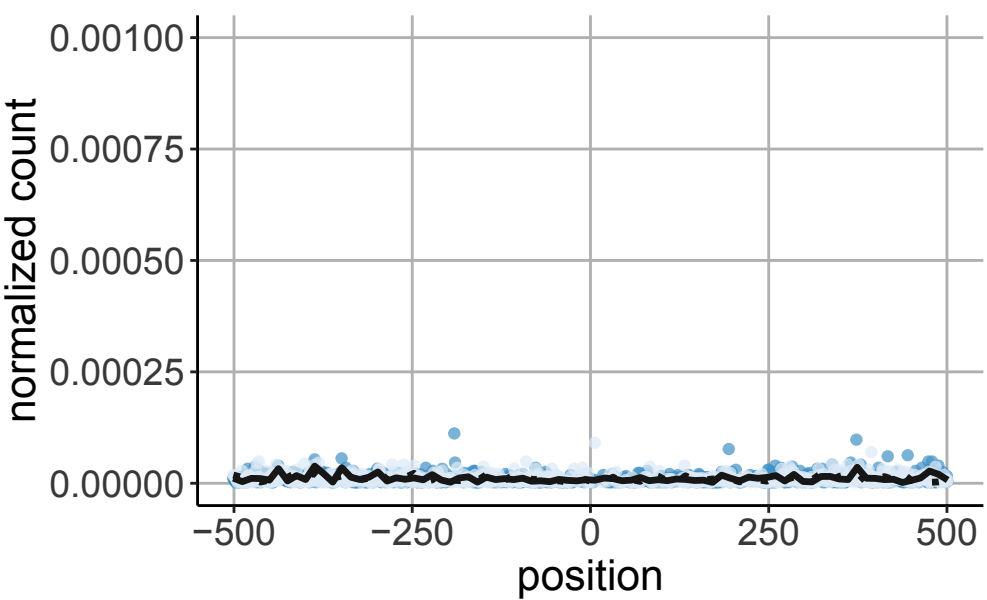

RBMS1-GUAUUUAKNGGG

▪ antisense — sense    • antisense • sense

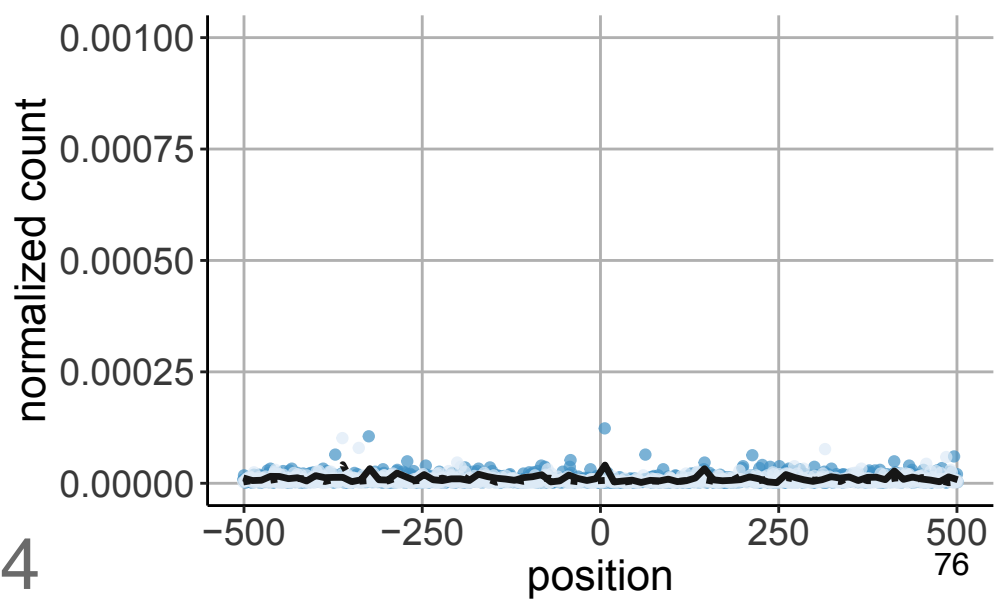

RBMS1-UUAUAAUCAAC

start codon

▪ antisense — sense    • antisense • sense

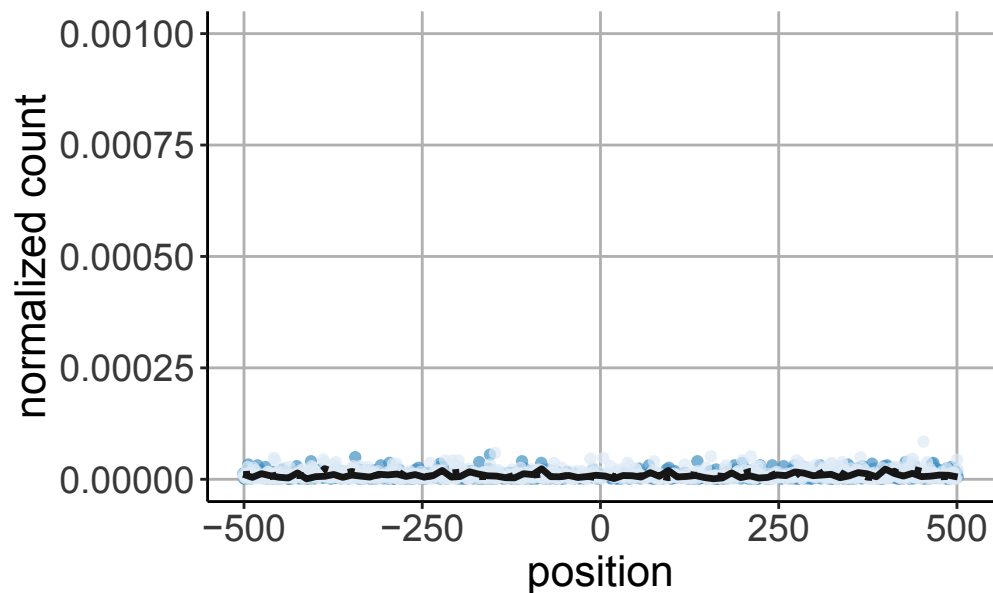

NOVA2\_3-UCAUUCAU

▪ antisense — sense    • antisense • sense

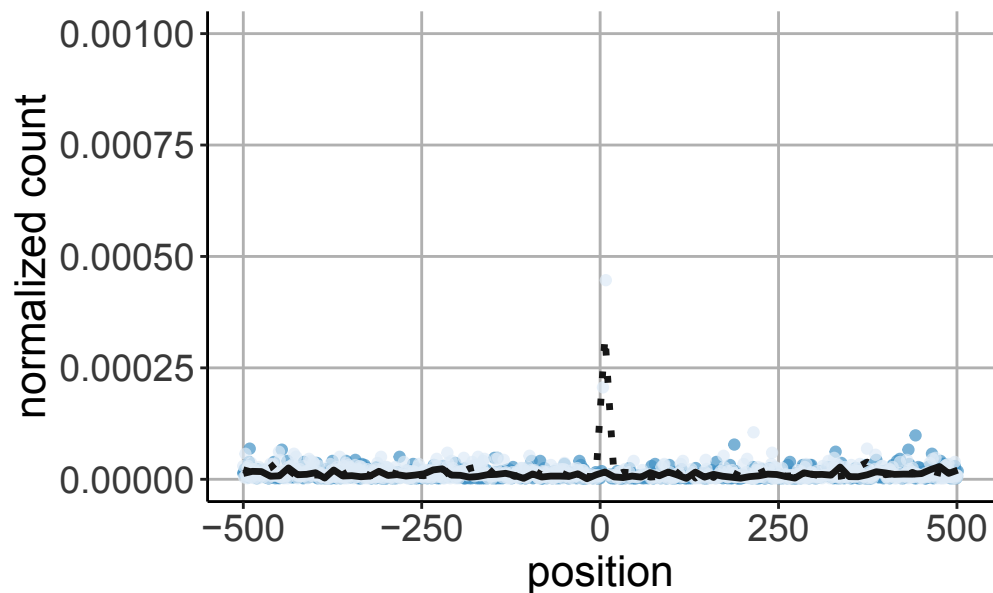

ZFP36-KUAUUUAUGGUGG

▪ antisense — sense    • antisense • sense

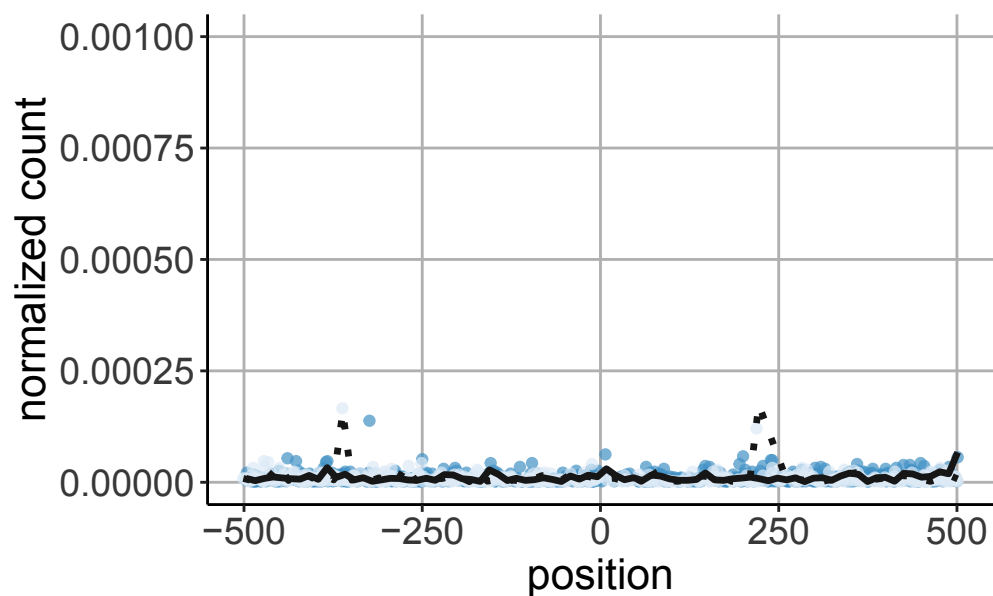

ZFP36-UUAUUUAUU

▪ antisense — sense    • antisense • sense

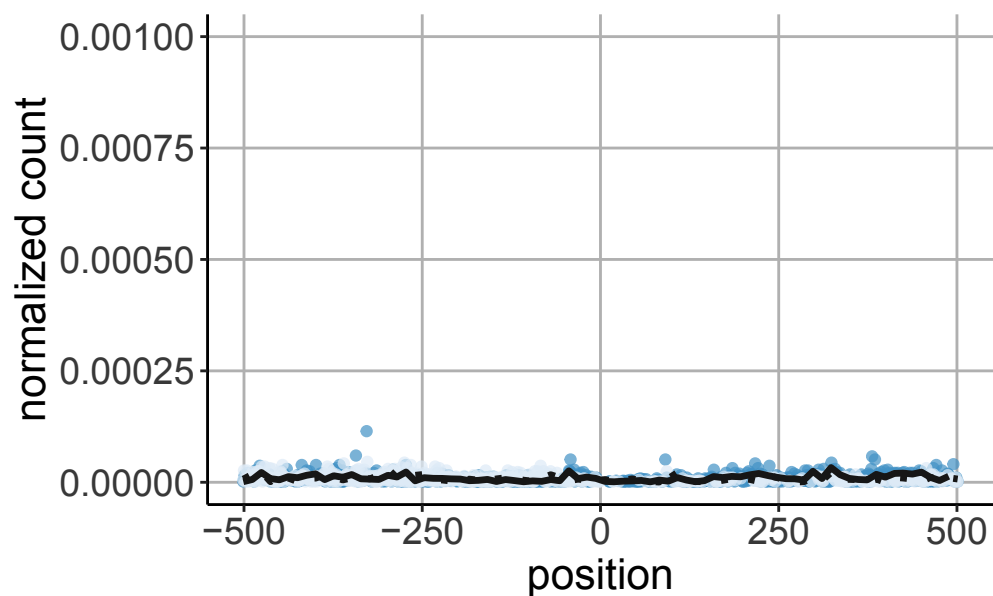

ELAVL4-UUUUAUUUUUG

▪ antisense — sense    • antisense • sense

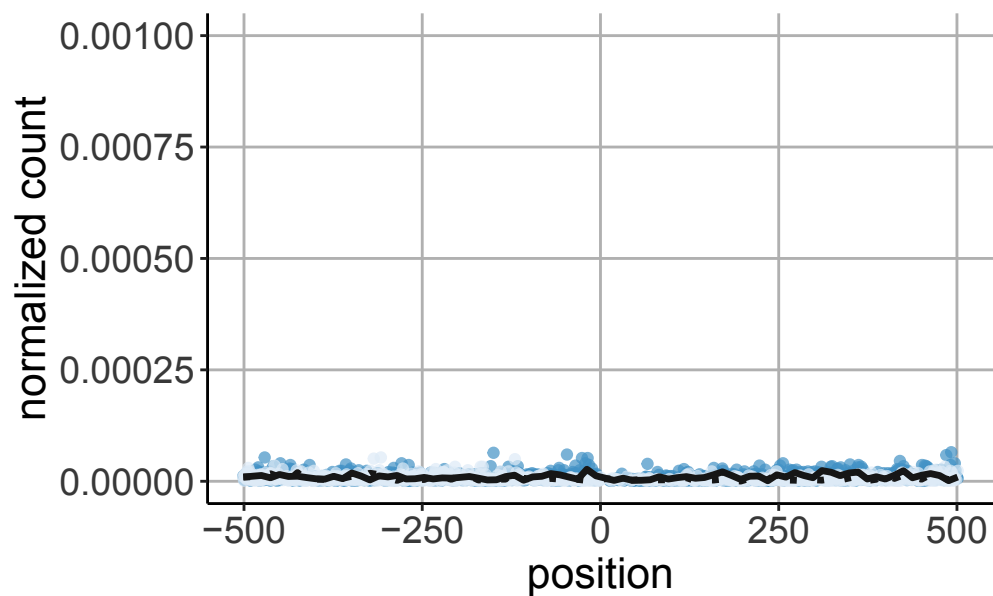

QKI-ACUAACANNACUAACA

▪ antisense — sense    • antisense • sense

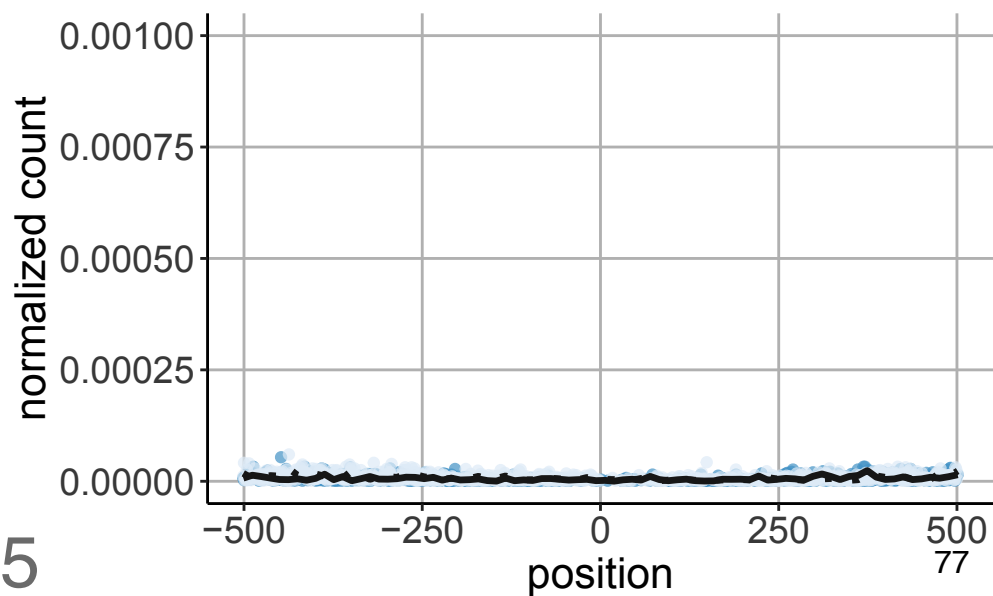

TARDBP-GUGUGAAUGG

start codon

▪ antisense — sense    • antisense • sense

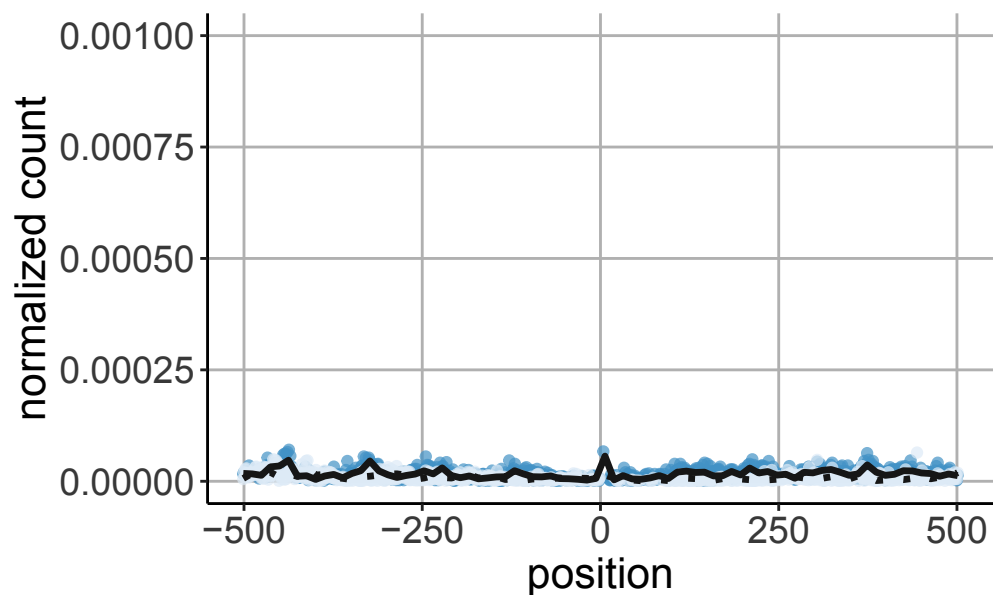

TARDBP-GUGUGNGUGUG

▪ antisense — sense    • antisense • sense

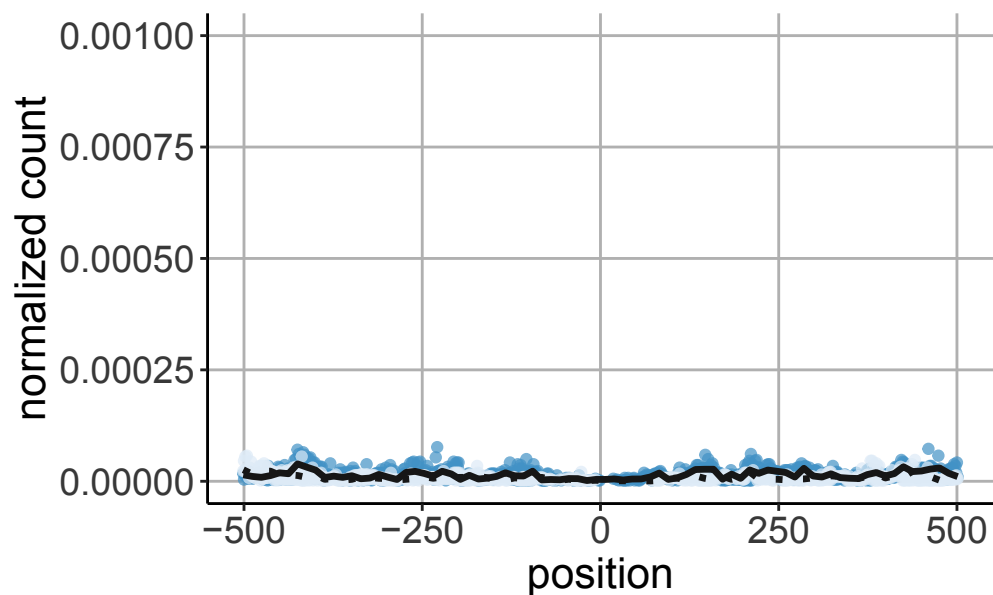

PUM2-NNUGUAYAGK

▪ antisense — sense    • antisense • sense

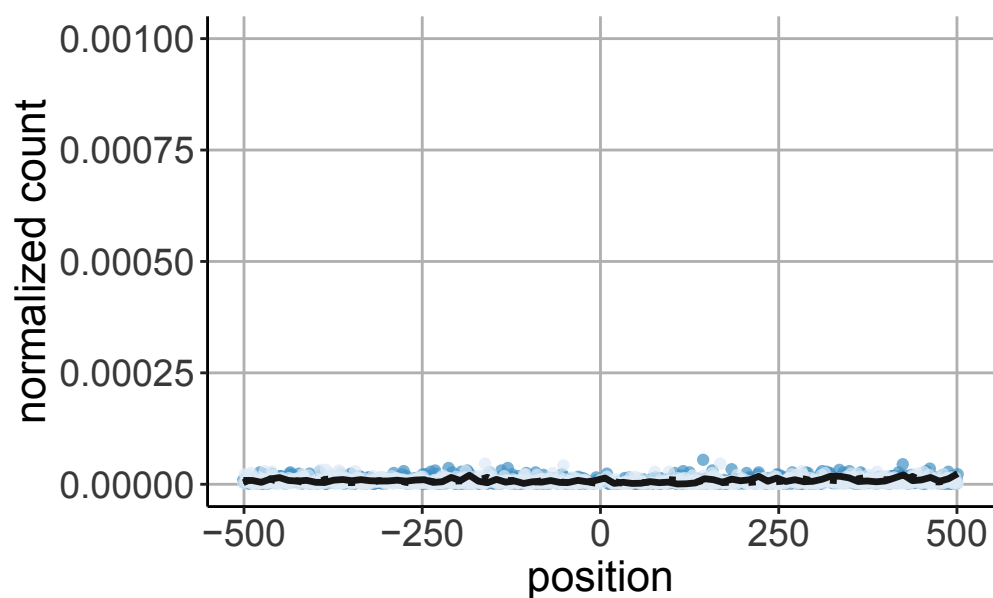

PUM2-NUGUAAAUAGKN

▪ antisense — sense    • antisense • sense

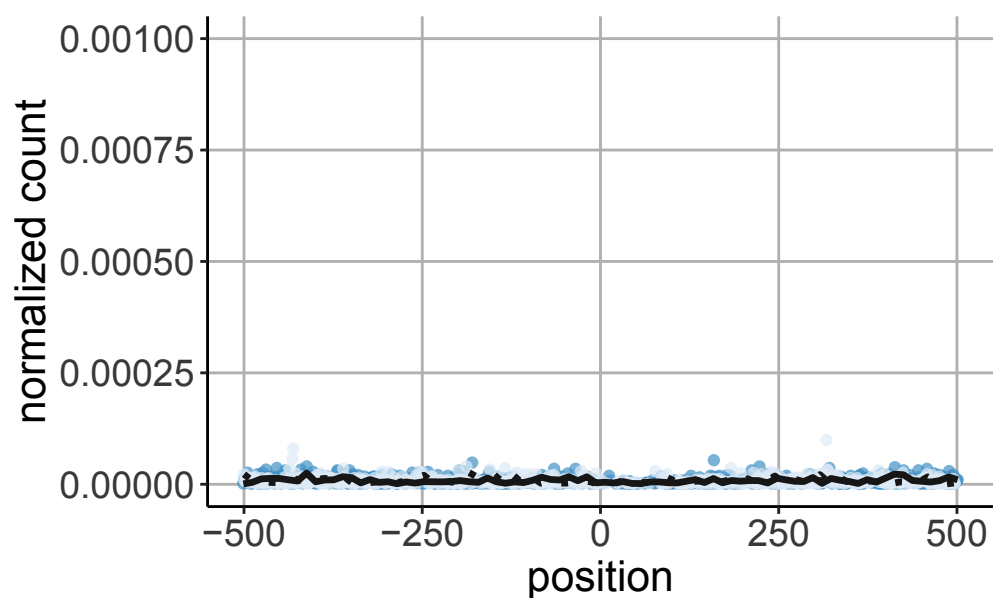

KHDRBS3-UAAANNNNNNNUAAA

▪ antisense — sense    • antisense • sense

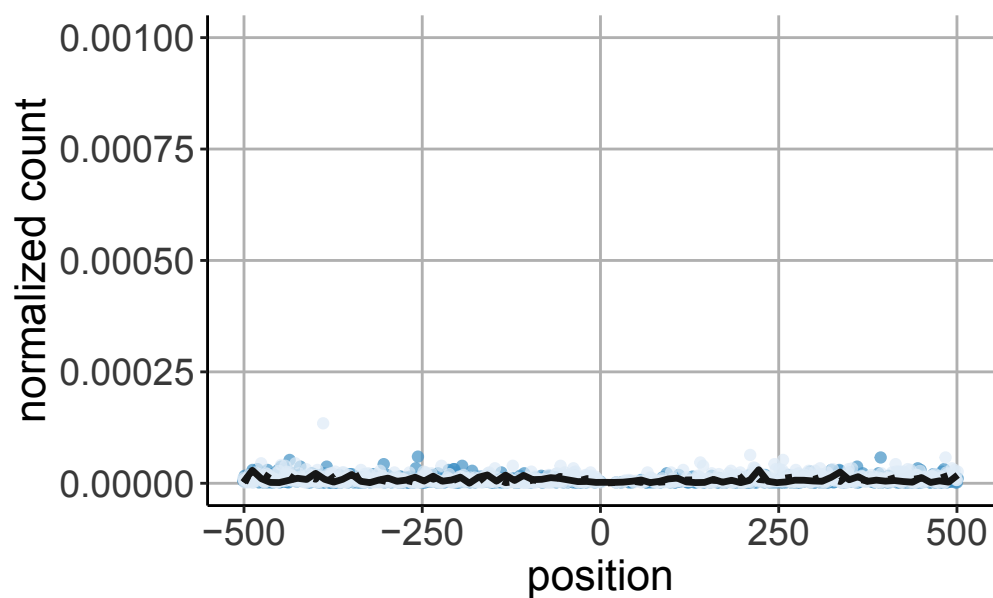

THUMPD1-UUCGUGGCUUG

▪ antisense — sense    • antisense • sense

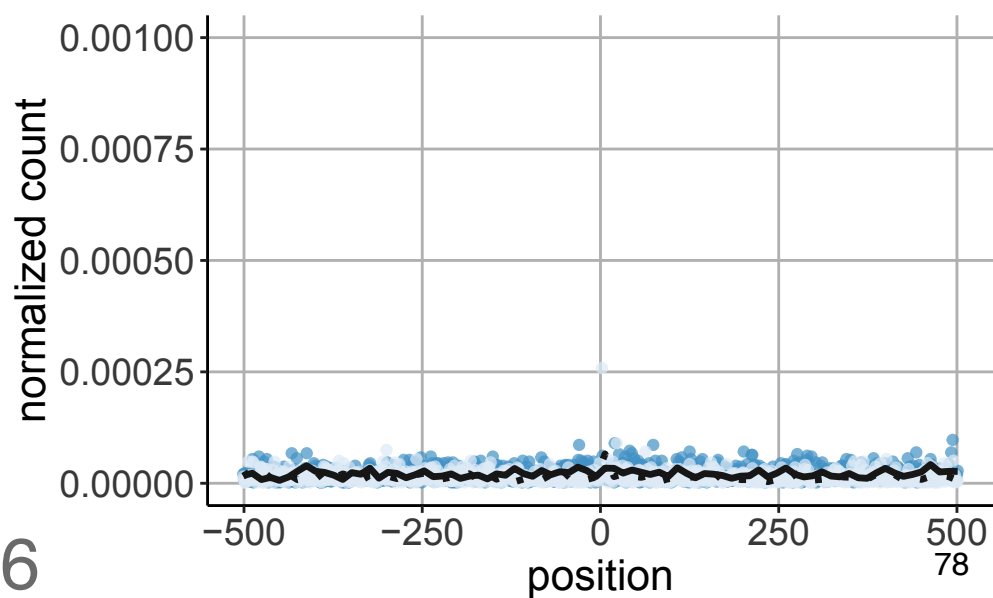

start codon

THUMPD1-WGCGCGGUYUU

• antisense — sense • antisense • sense

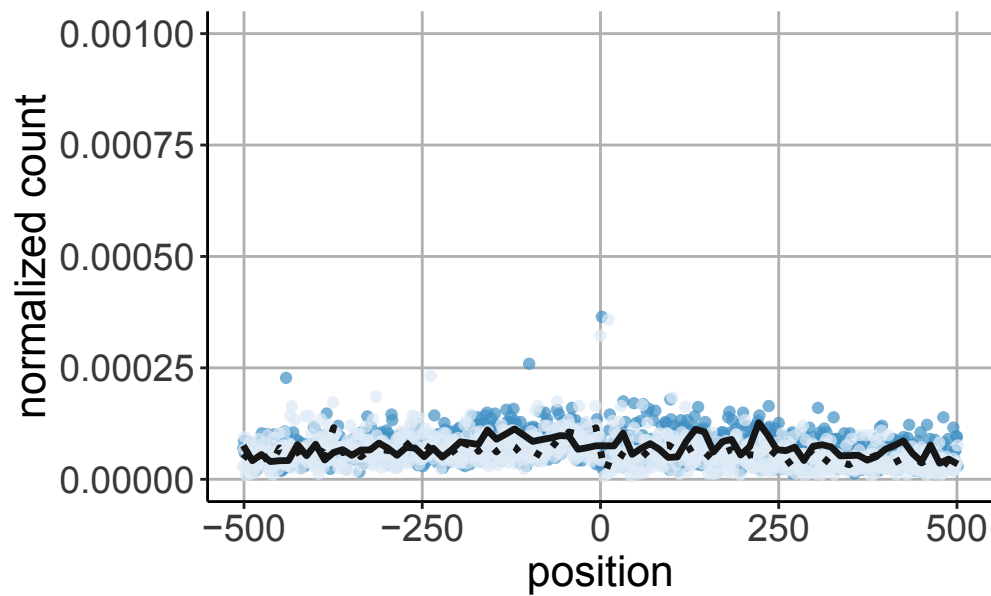

ZFR\_4-GGCACGGAUG

• antisense — sense • antisense • sense

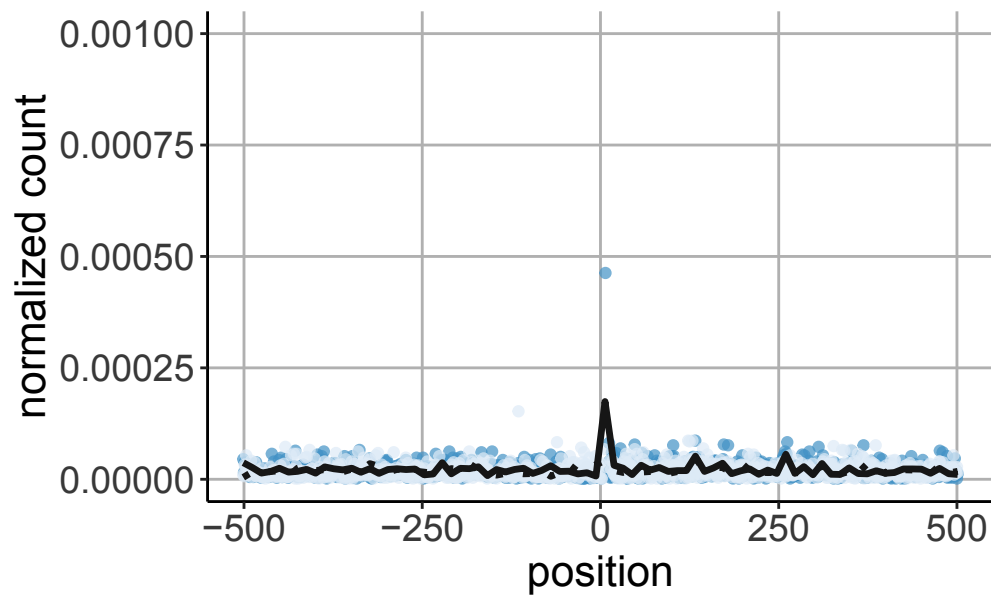

ZFR\_4-UUGCCGGAUGYCGU

• antisense — sense • antisense • sense

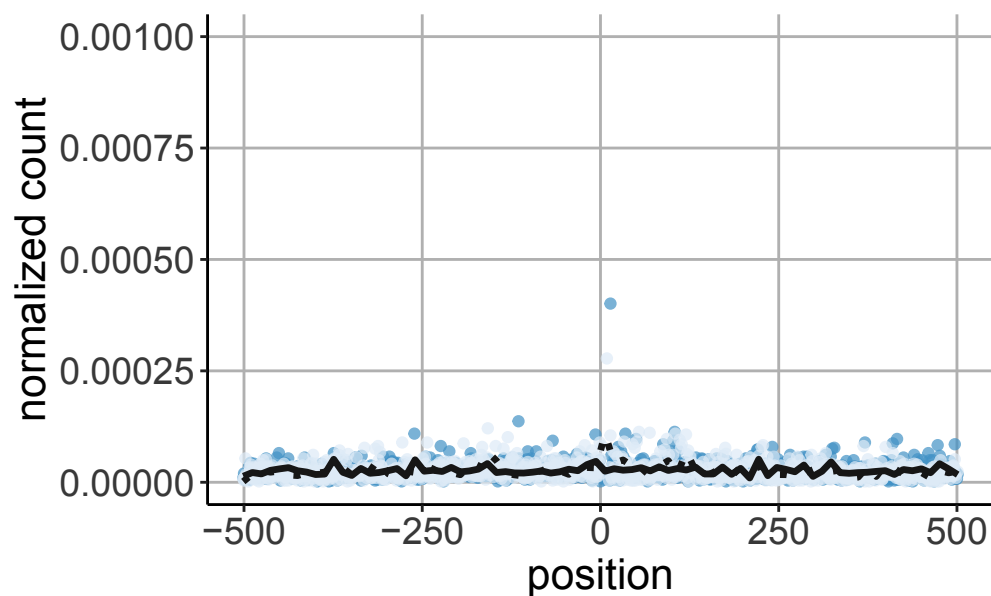

PCBP1-UCCUUNNCCUU

• antisense — sense • antisense • sense

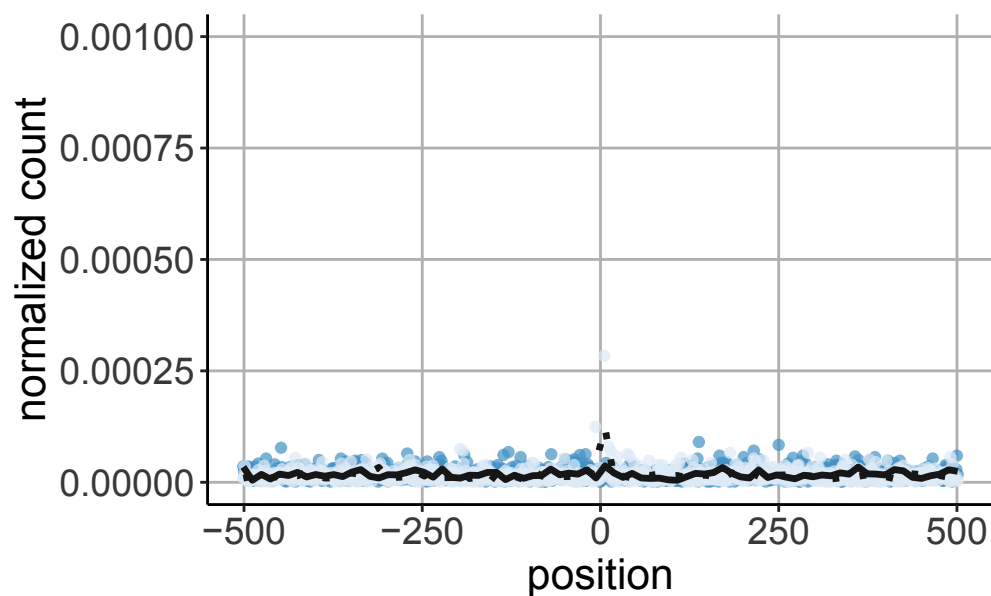

HNRNPA3-UAGGUAAGGG

• antisense — sense • antisense • sense

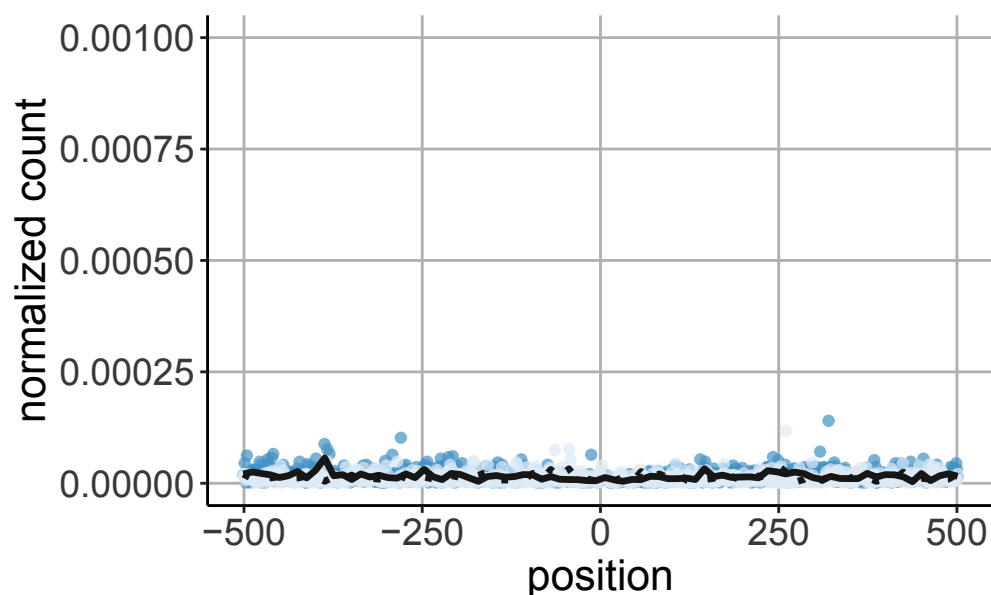

RBM38-KKGUGUGUGUGUKK

• antisense — sense • antisense • sense

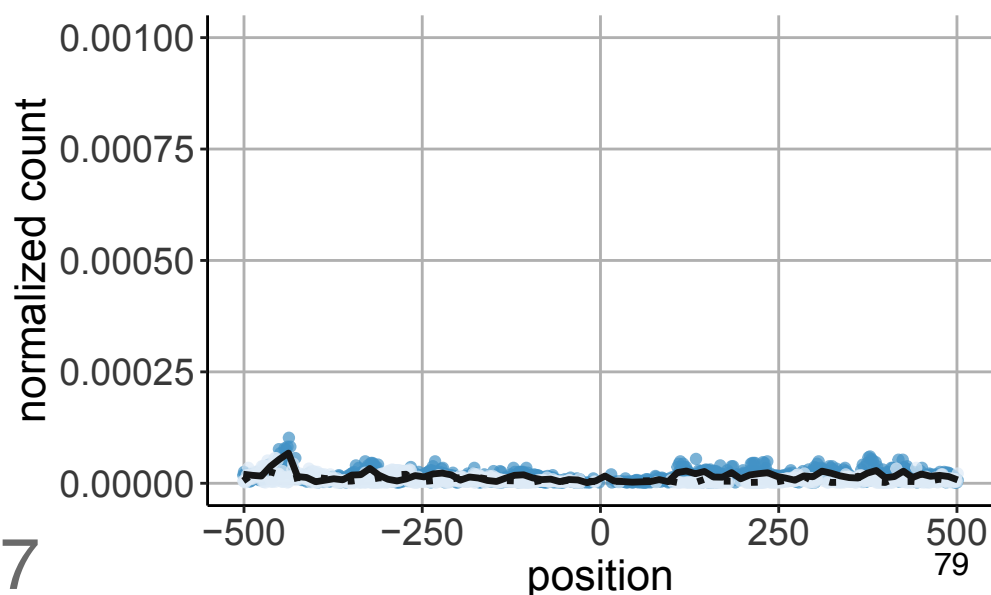



### MEX3D-UNURUUUAUU

start codon

▪ antisense — sense    • antisense • sense

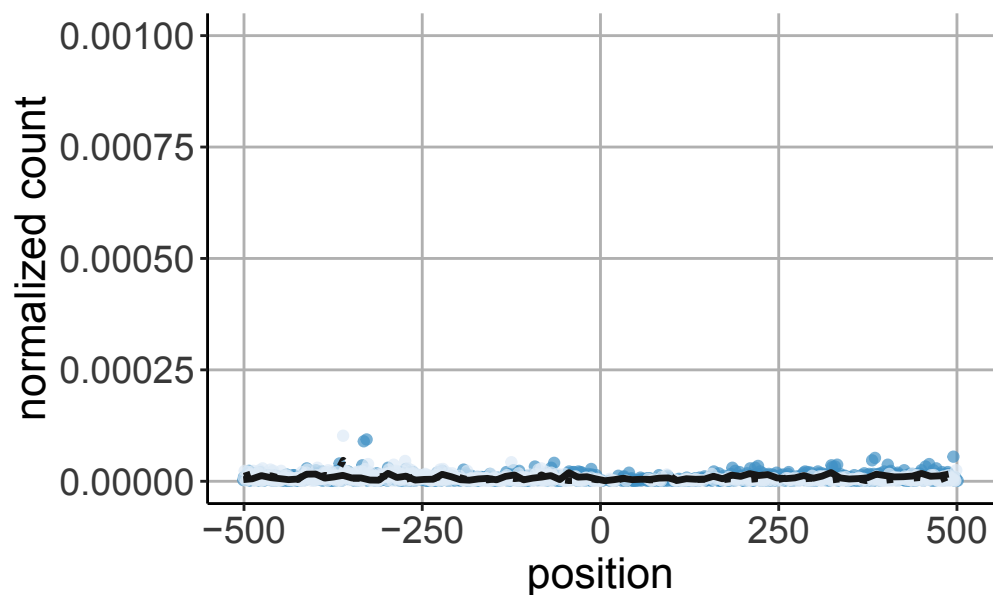

### RBPM2-CACAGNGCACA

▪ antisense — sense    • antisense • sense

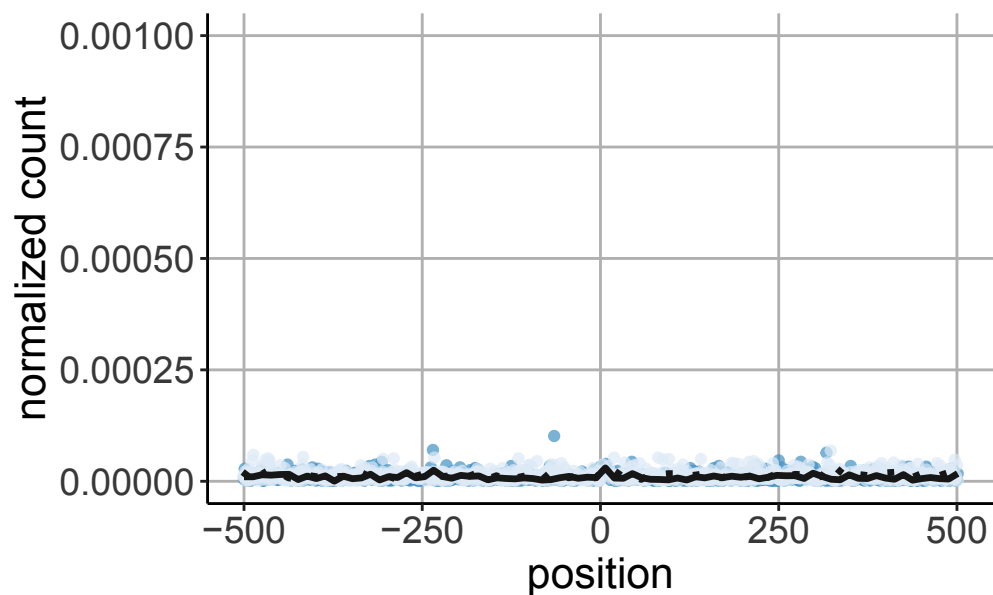

### RBPM2-UCACRUGCACA

▪ antisense — sense    • antisense • sense

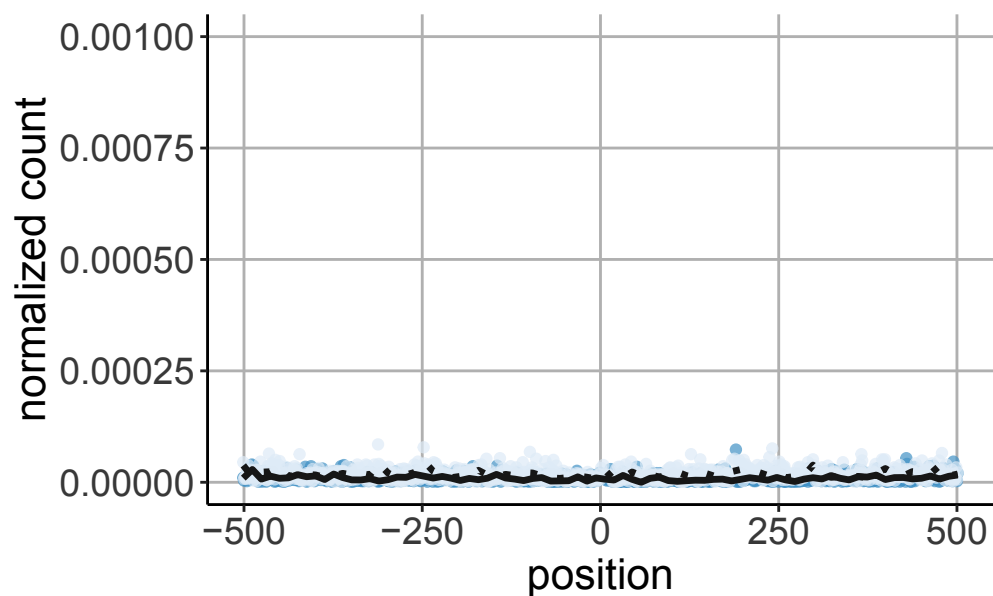

### RBPM2-UGCACA

▪ antisense — sense    • antisense • sense

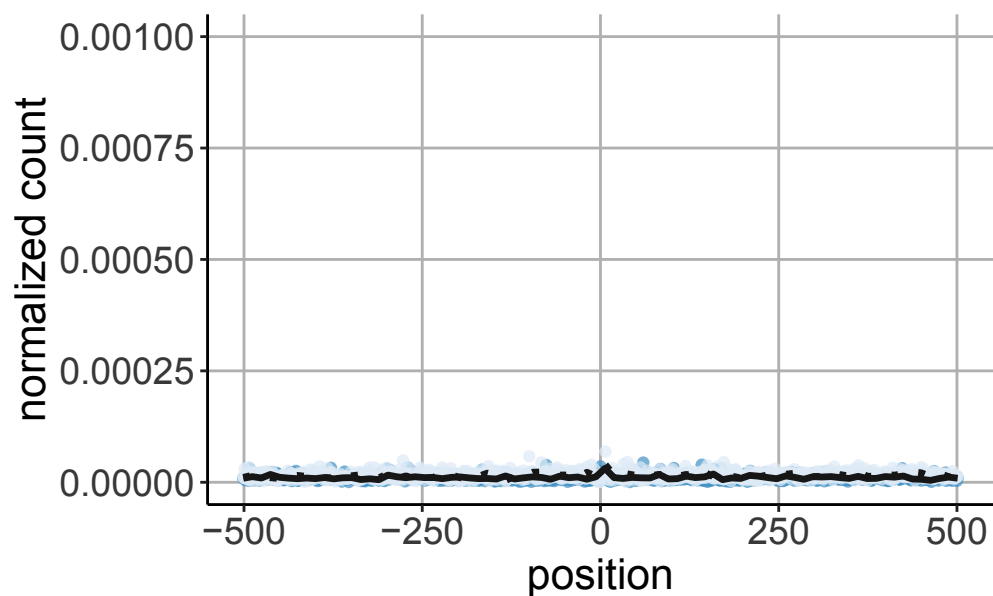

### YBX2-GCCAUNNNAUCGC

▪ antisense — sense    • antisense • sense

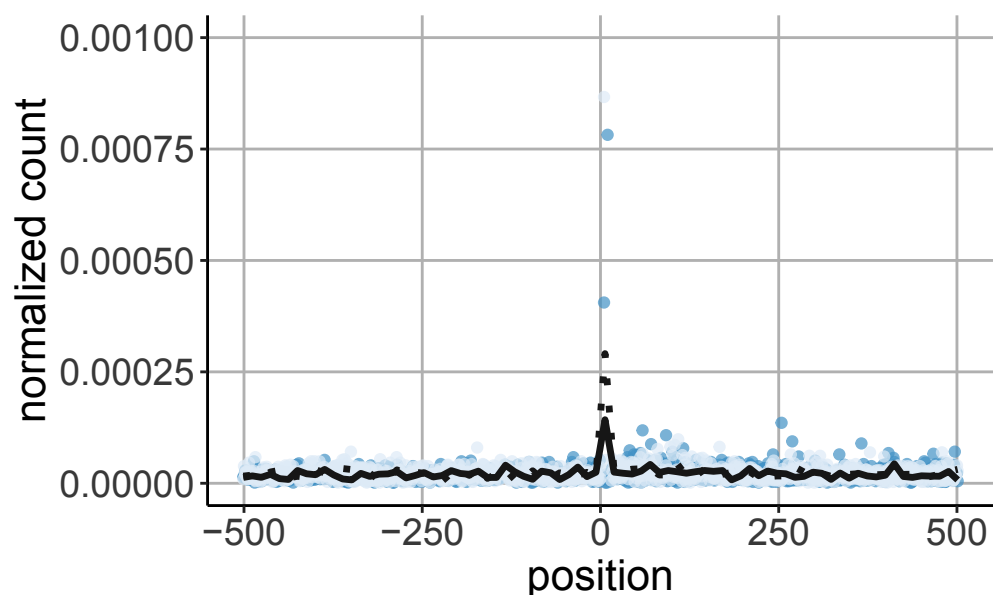

### YBX2-NUAACAUCNN

▪ antisense — sense    • antisense • sense

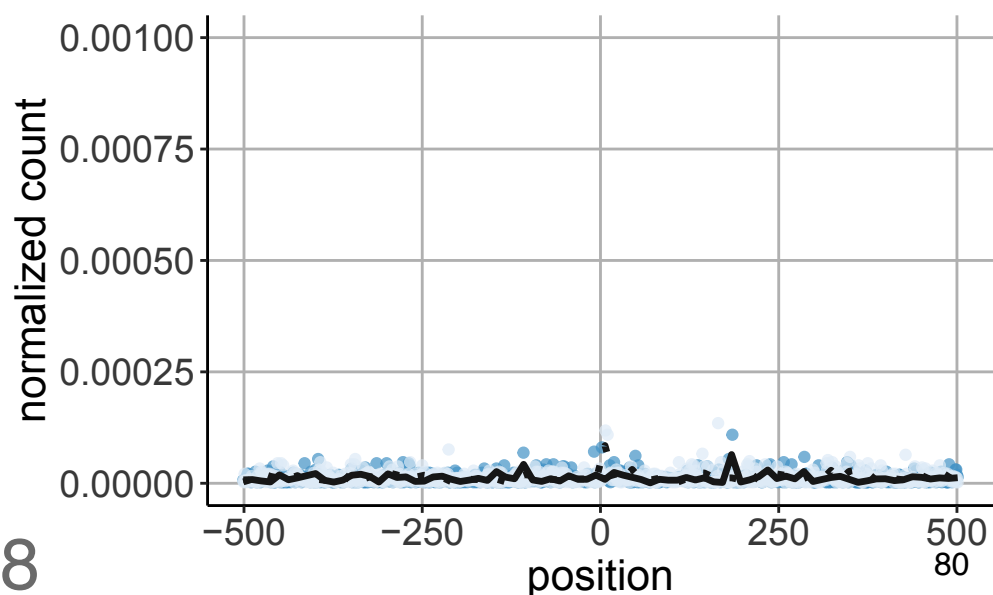

## CSTF2T-CGUAGCGUCU

start codon

▪ antisense — sense    • antisense • sense

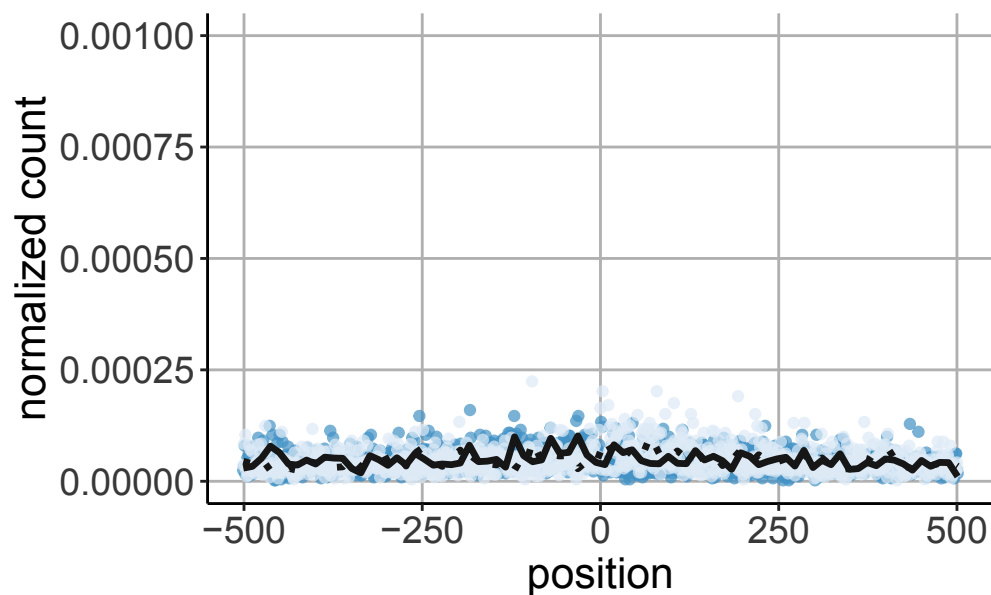

## SNRNP70-GNUCANGNG

▪ antisense — sense    • antisense • sense

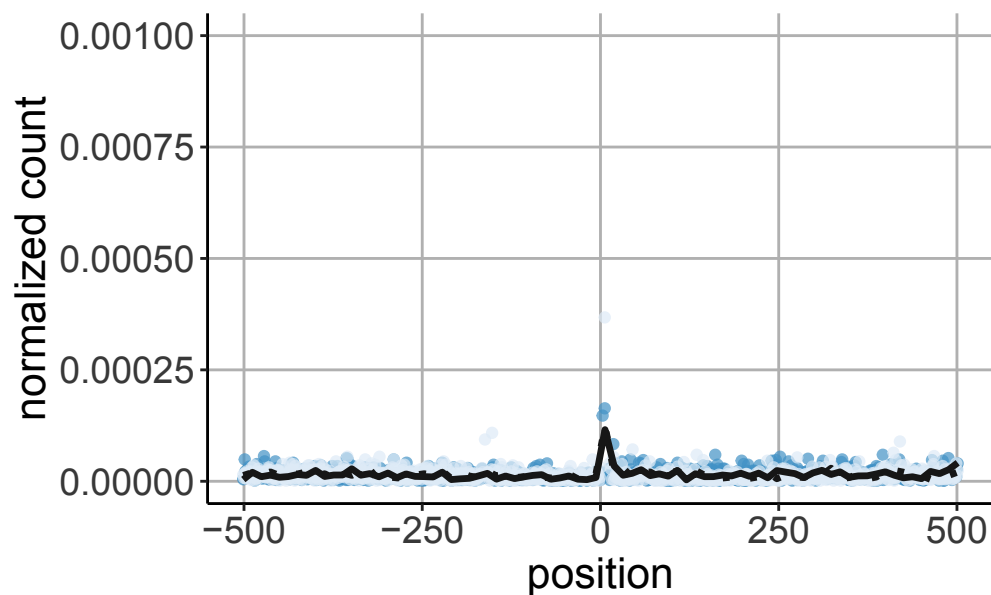

## SNRNP70-GUUCAAGGUG

▪ antisense — sense    • antisense • sense

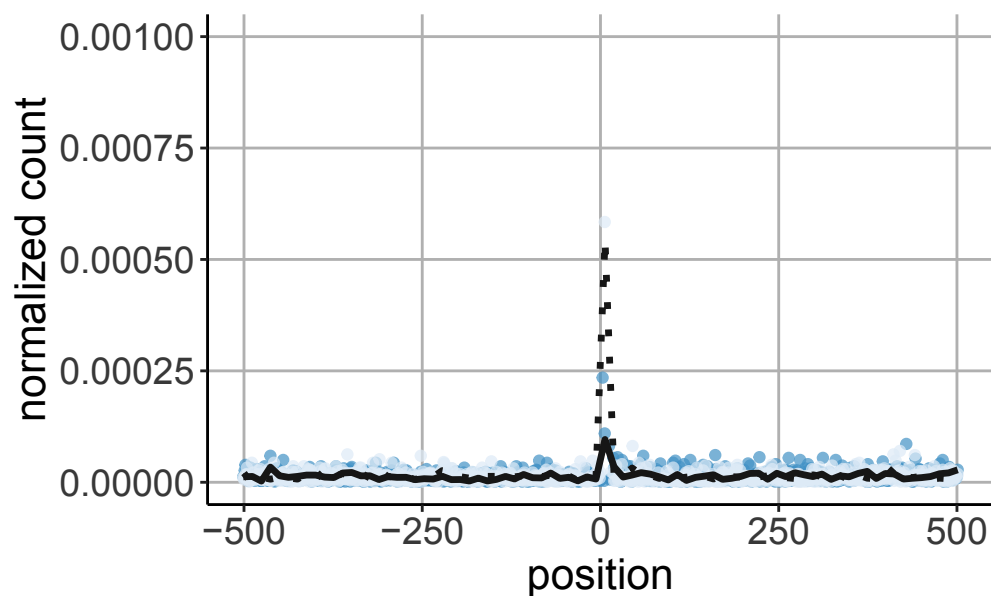

## DAZ4-GYUCUAGUUAGYAUC

▪ antisense — sense    • antisense • sense

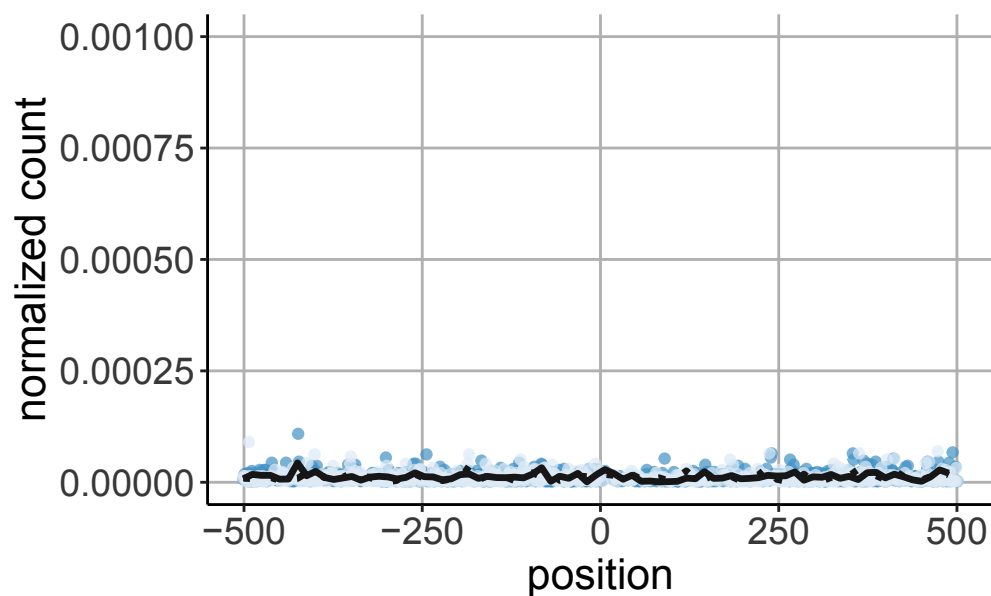

## IGF2BP1-CAGNUWCA

▪ antisense — sense    • antisense • sense

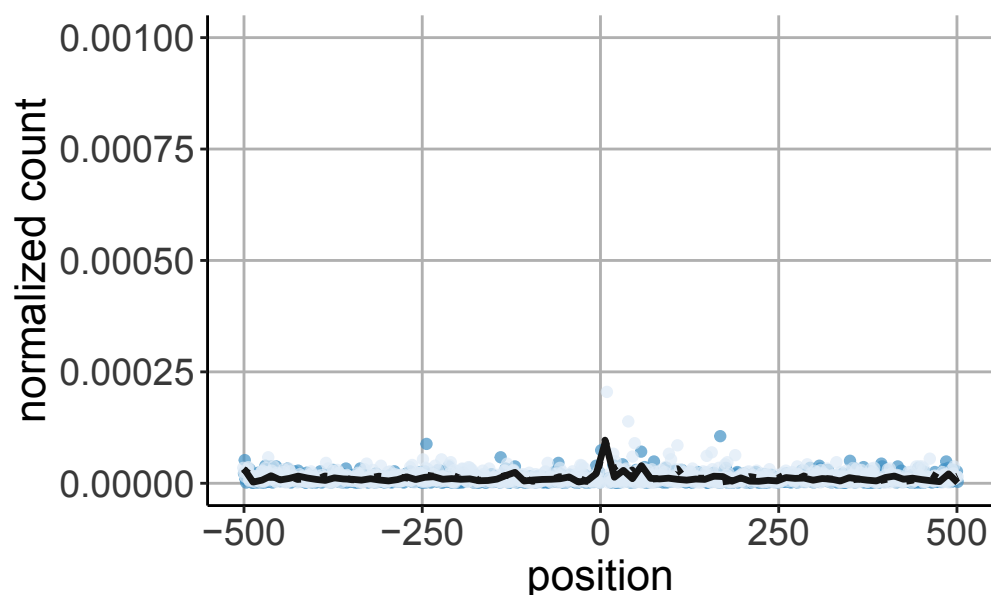

## HEXIM2-NGCGACGGKN

▪ antisense — sense    • antisense • sense

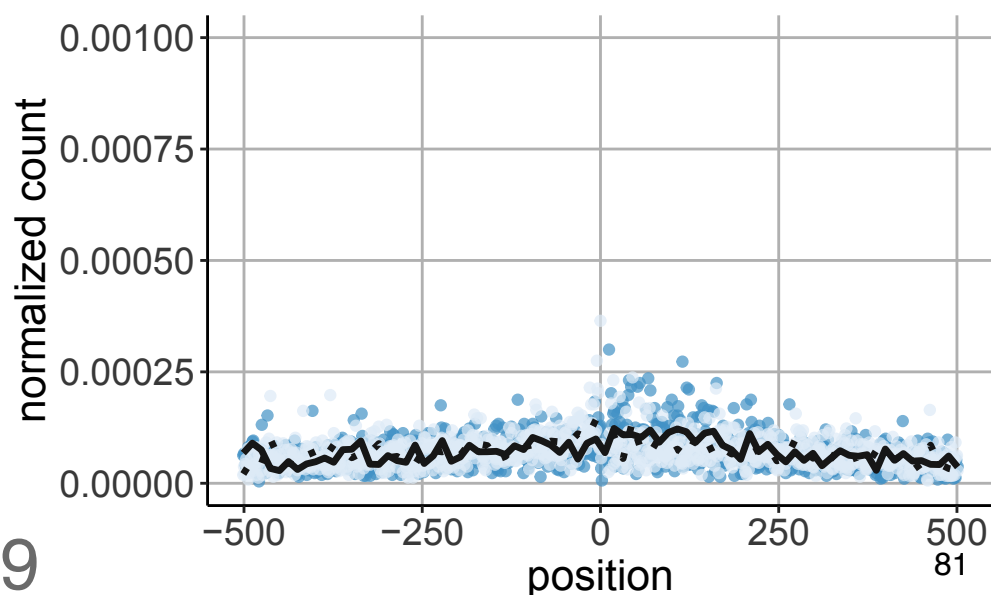

## YBX1-NUAACAUCGGG

start codon

▪ antisense — sense    • antisense • sense

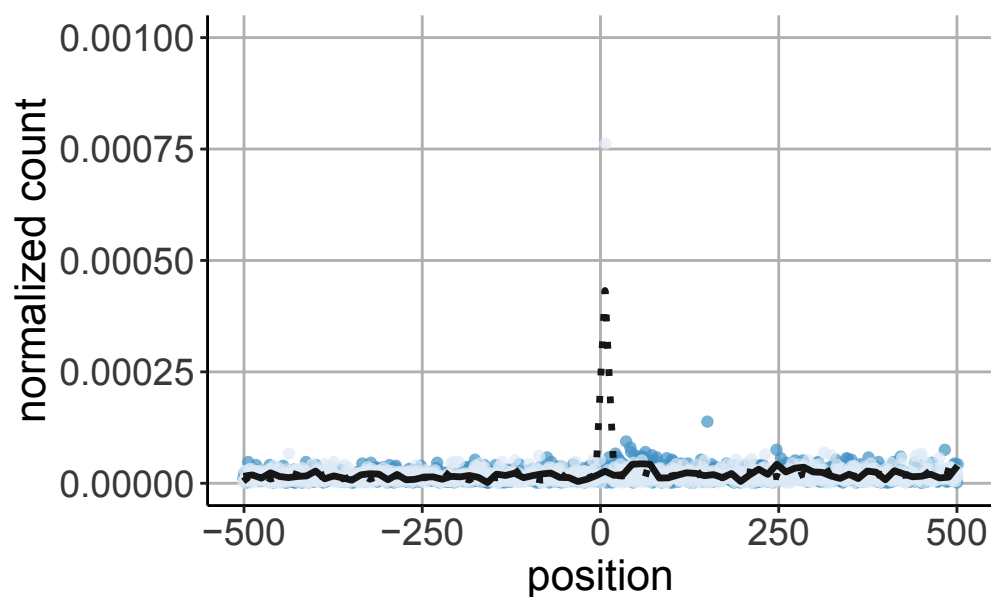

## RBM24-GUGUGNGUGUG

▪ antisense — sense    • antisense • sense

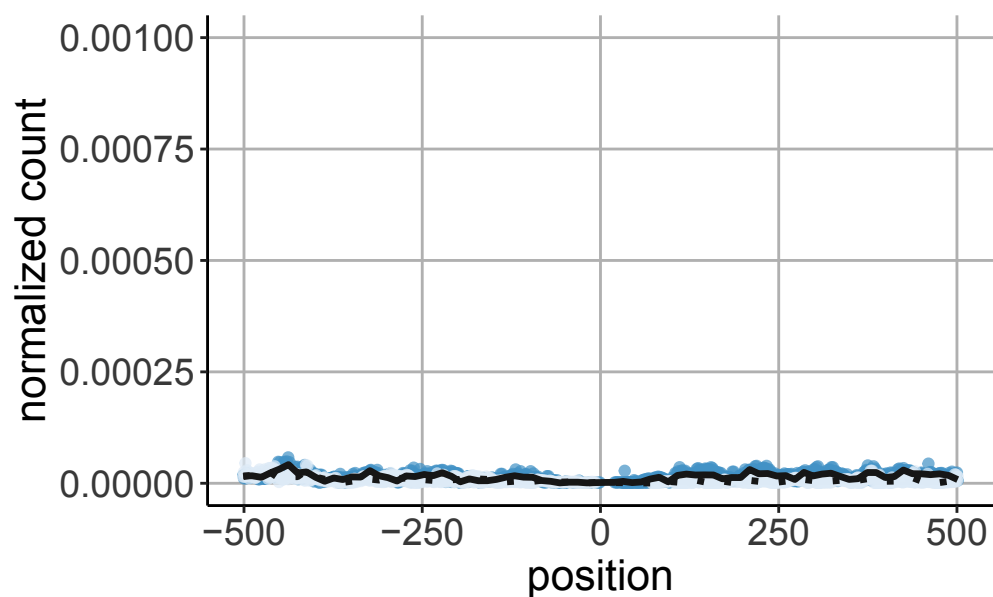

## CSDA-UAACAUCA

▪ antisense — sense    • antisense • sense

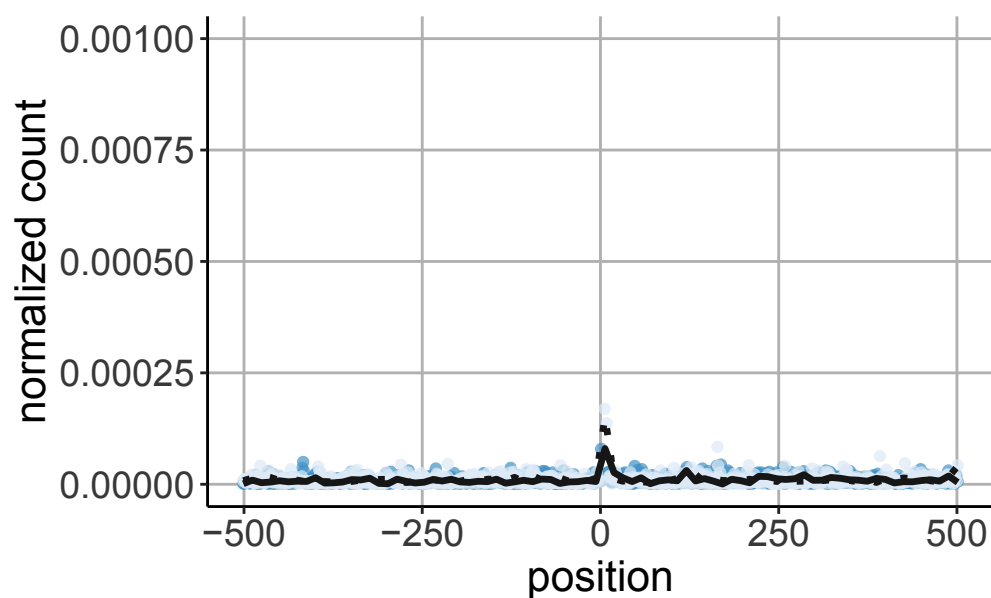

## HNRNPA1L2-NUAGGUUAGGGW

▪ antisense — sense    • antisense • sense

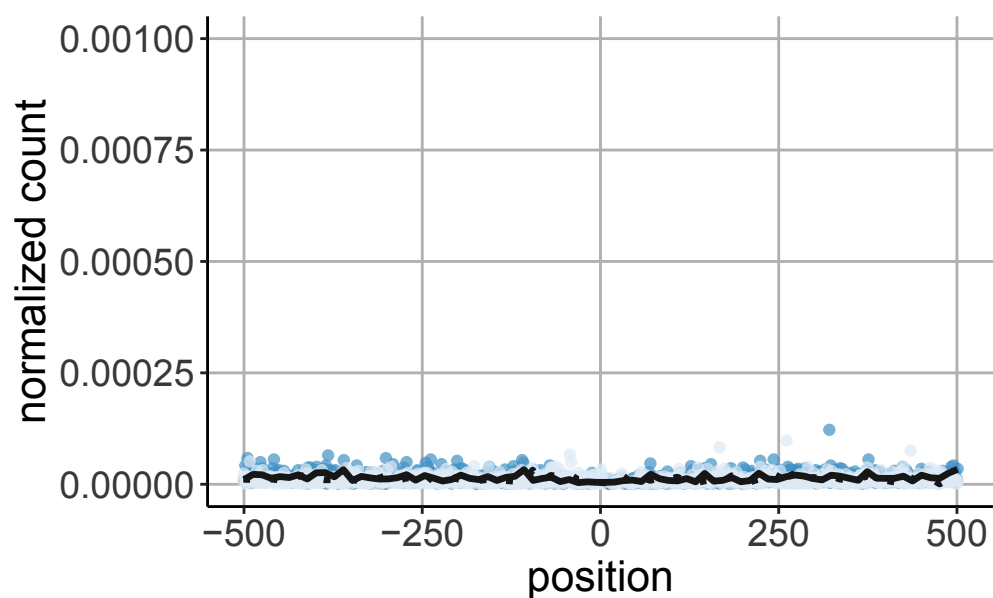

## ZC3H12B-NGCGNCAGUCGGUAGCN

▪ antisense — sense    • antisense • sense

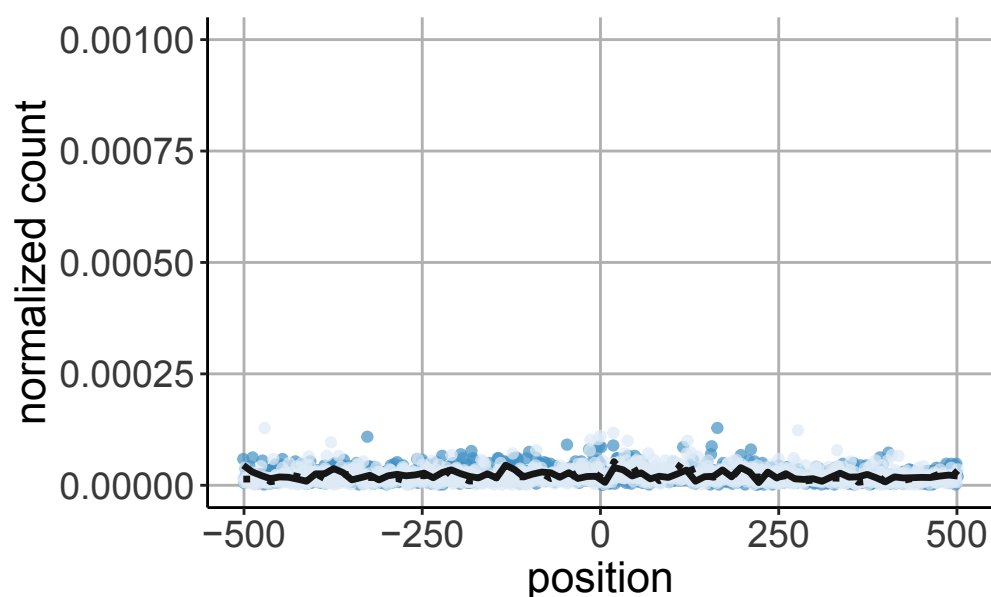

## ZC3H12A-NUUGCCAWAGUKU

▪ antisense — sense    • antisense • sense

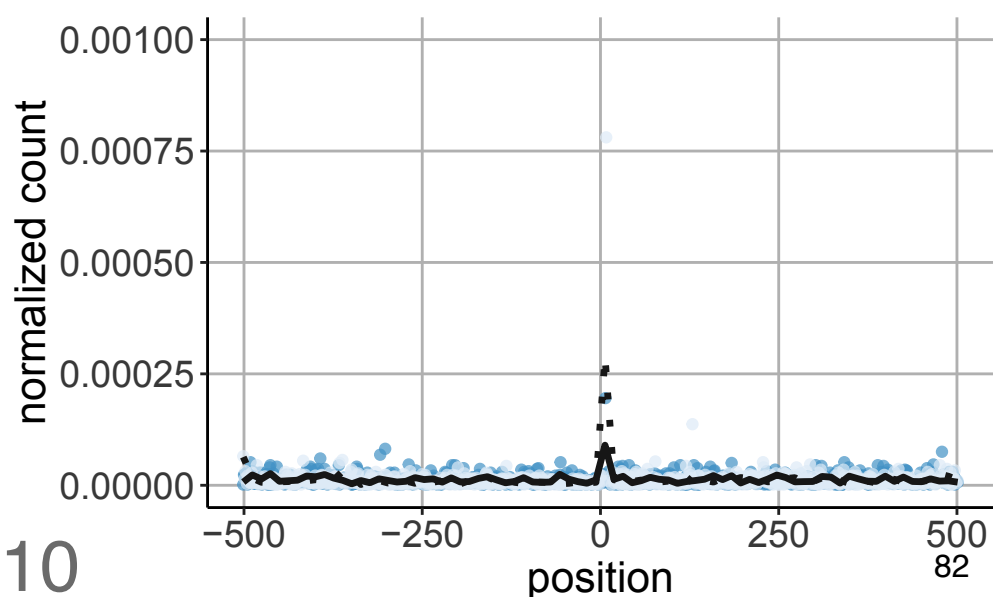

DAZAP1-UUAGGUUAGG

start codon

▪ antisense — sense    • antisense • sense

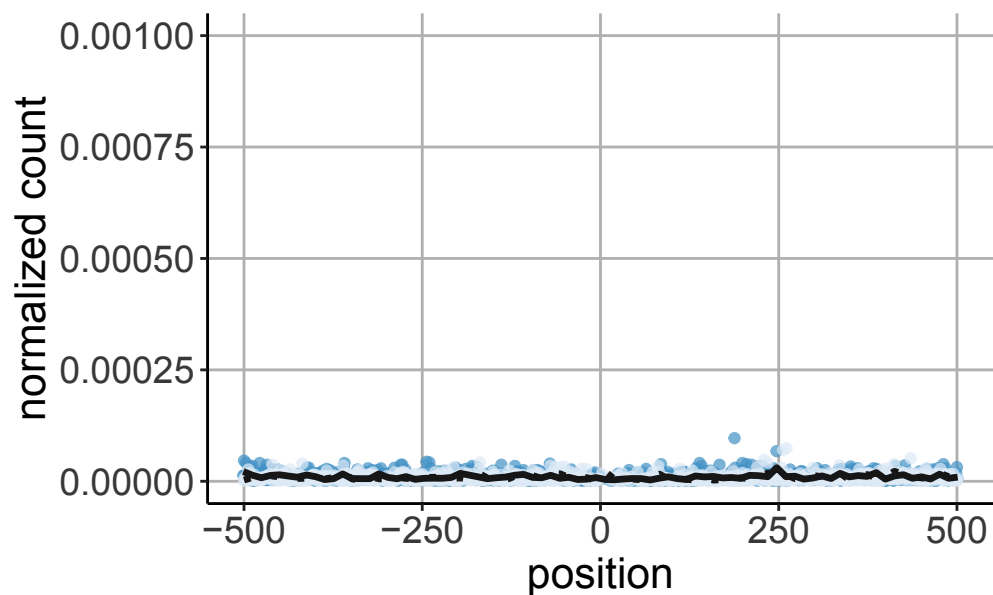

CARHSP1-GCCAUGAUGAU

▪ antisense — sense    • antisense • sense

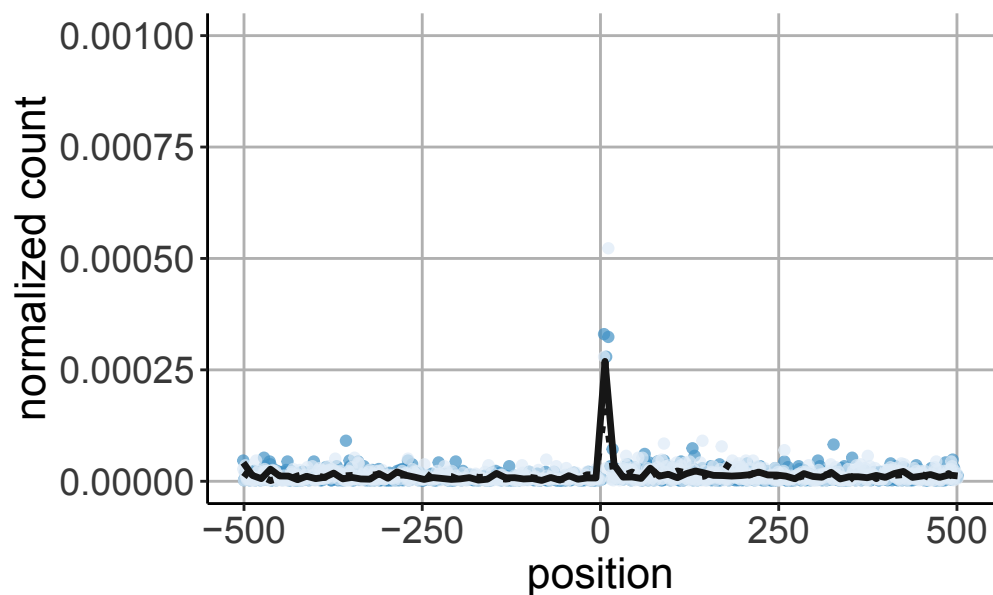

CARHSP1-UUGCCUUGUCCCGAU

▪ antisense — sense    • antisense • sense

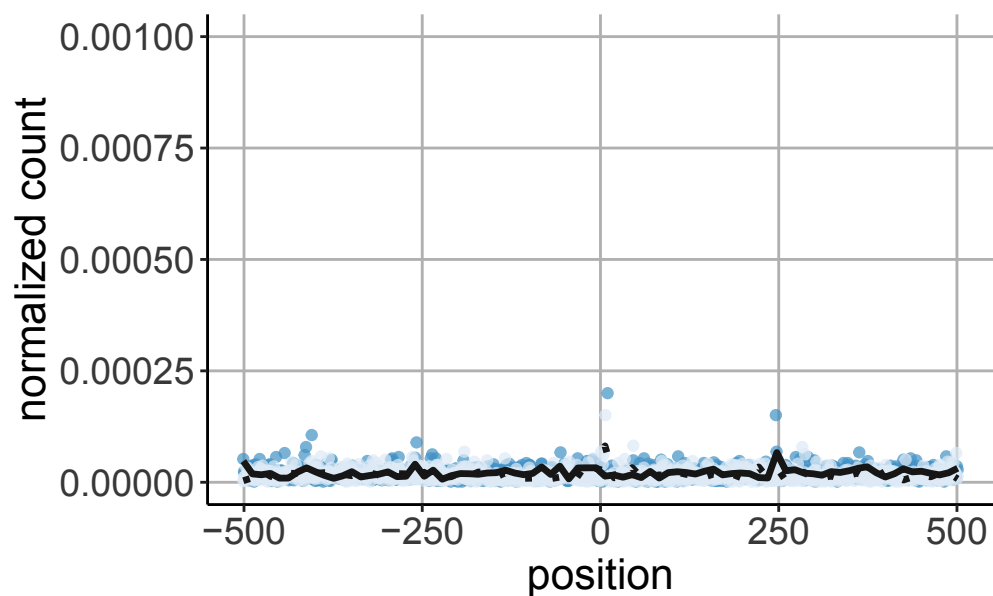

RNPC3-GGGUSUACGGGGU

▪ antisense — sense    • antisense • sense

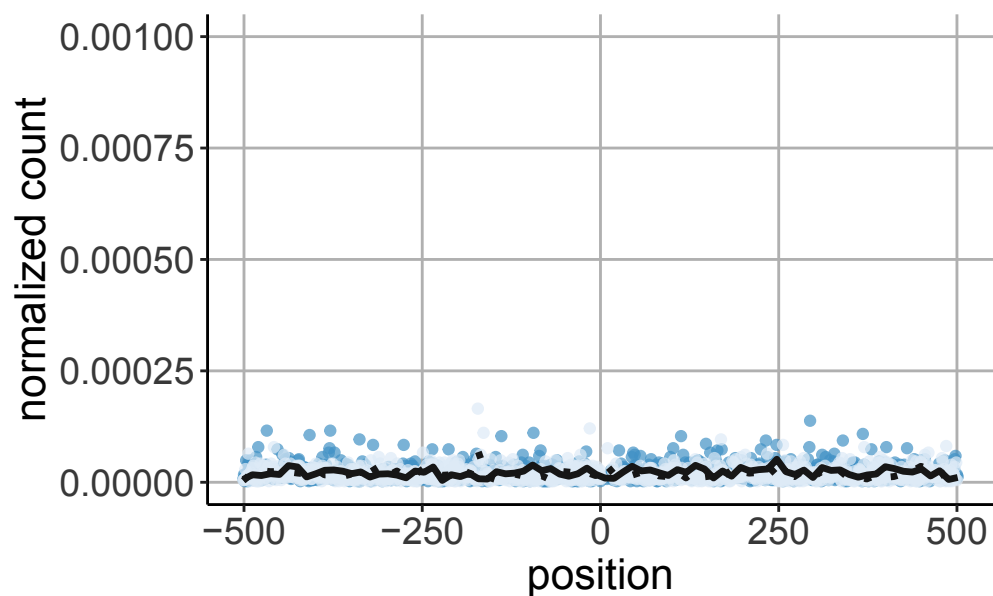

ELAVL1-UUUAUGNUUU

▪ antisense — sense    • antisense • sense

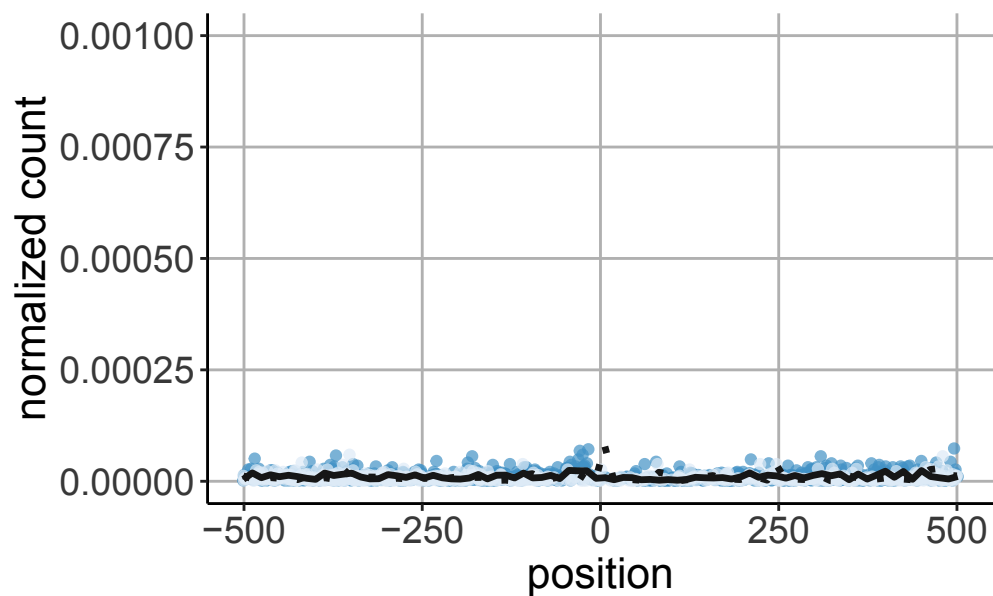

RBM46-GUGAUUG

▪ antisense — sense    • antisense • sense

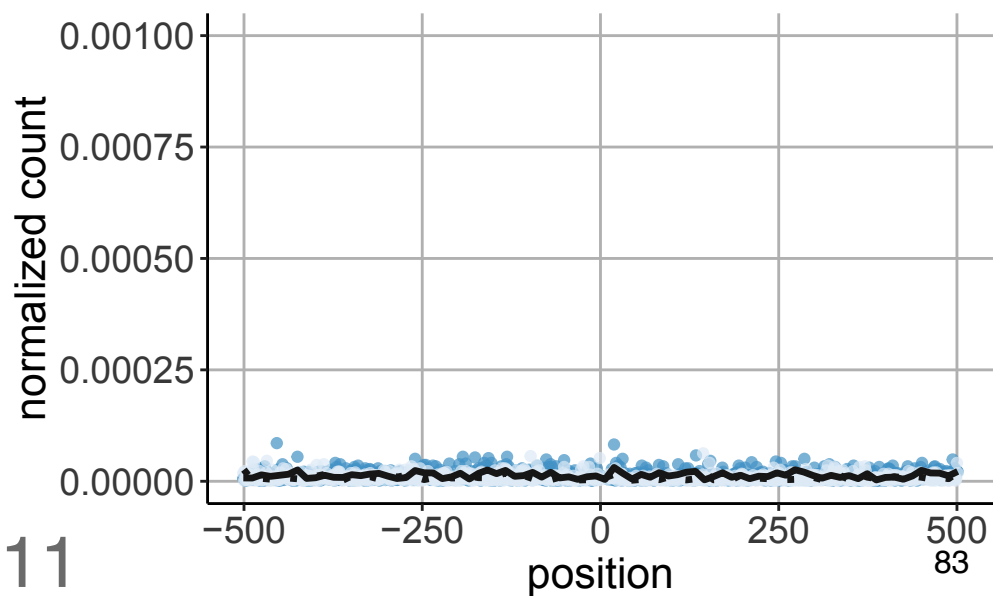

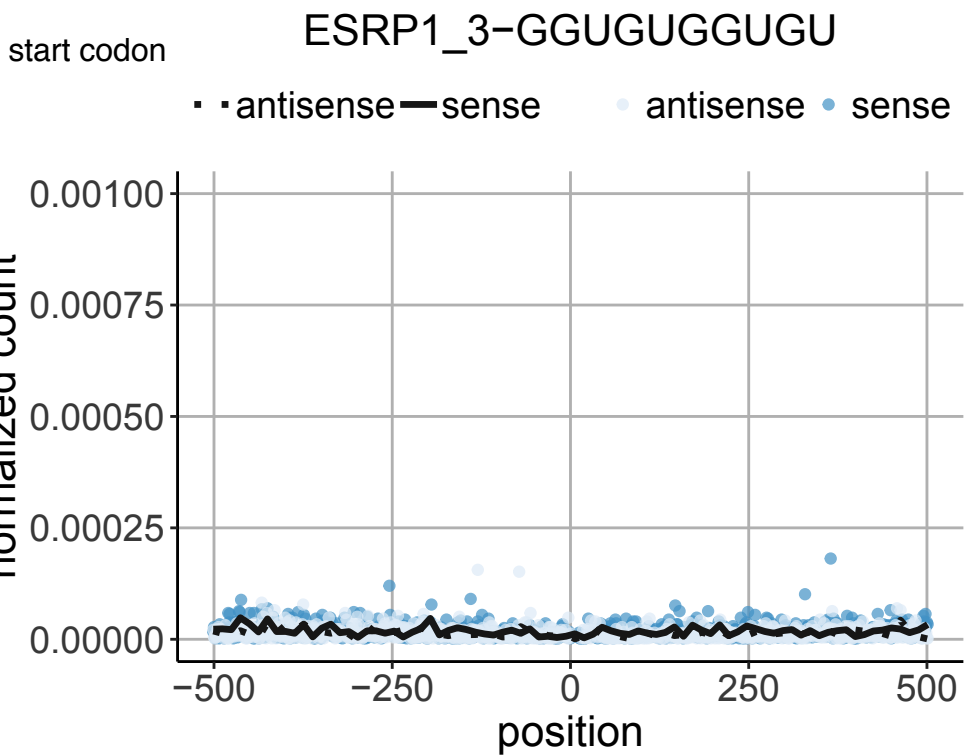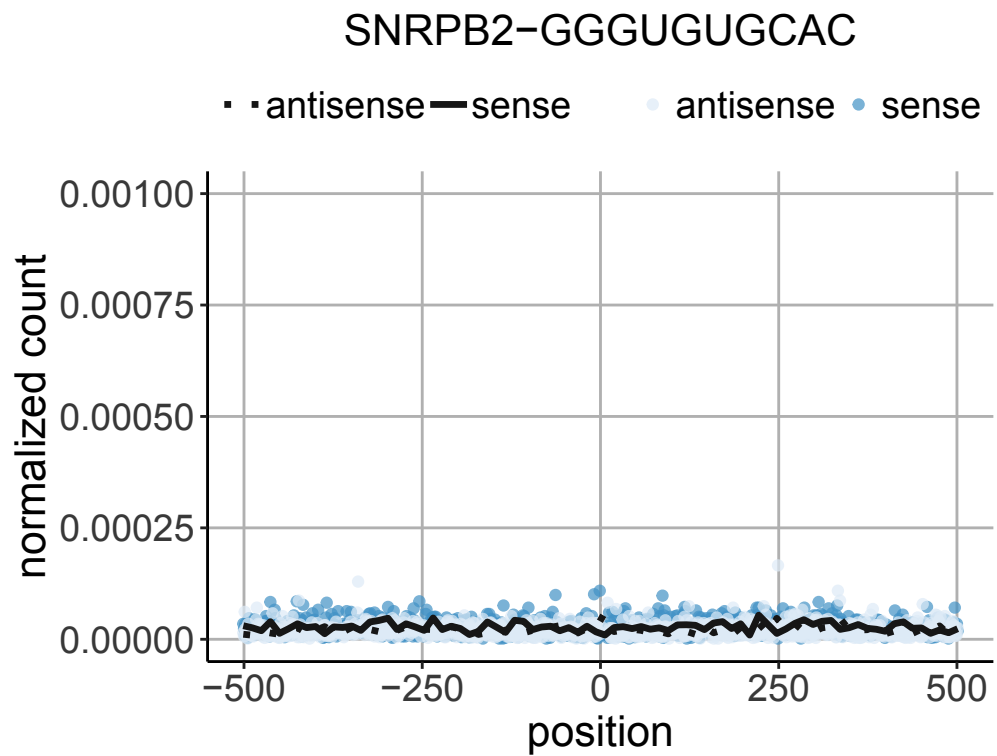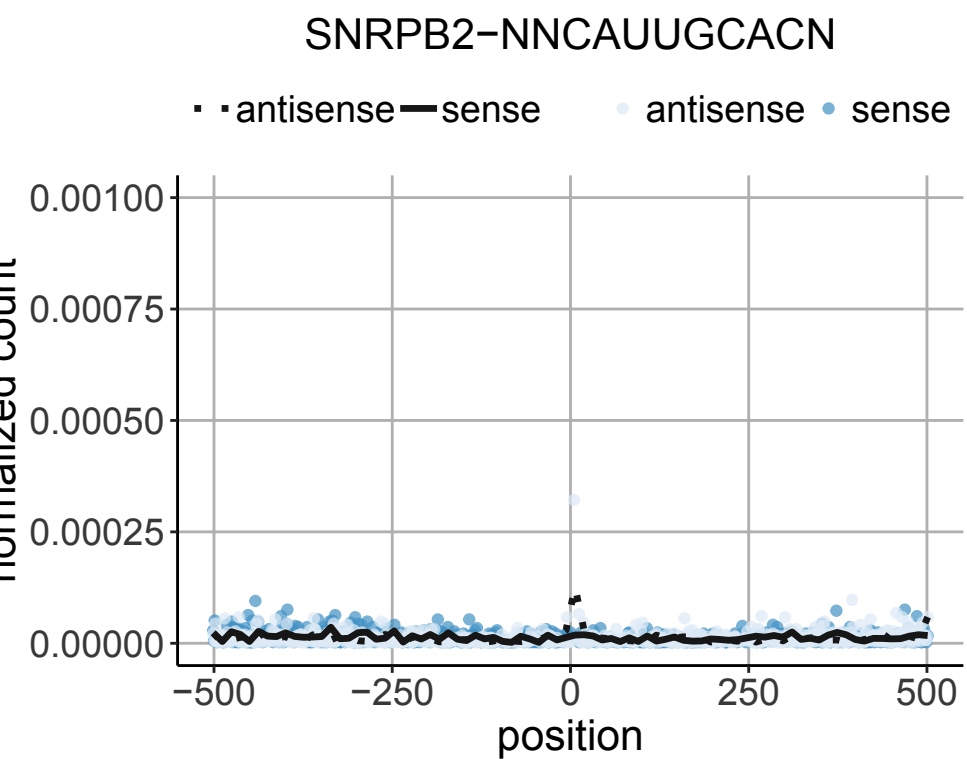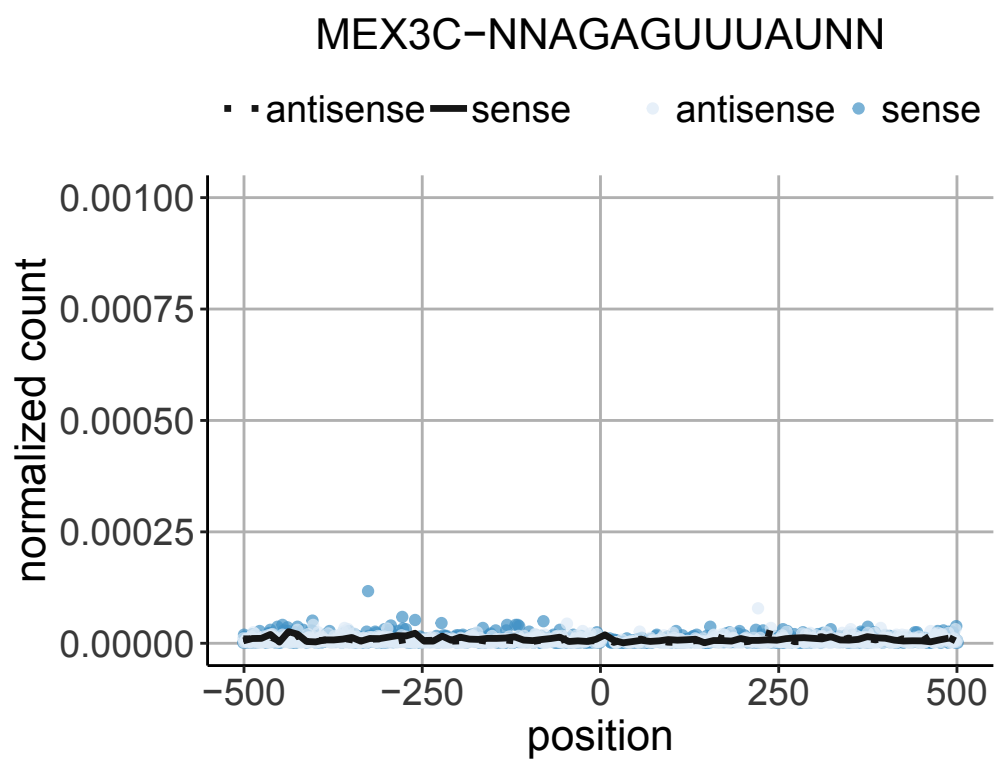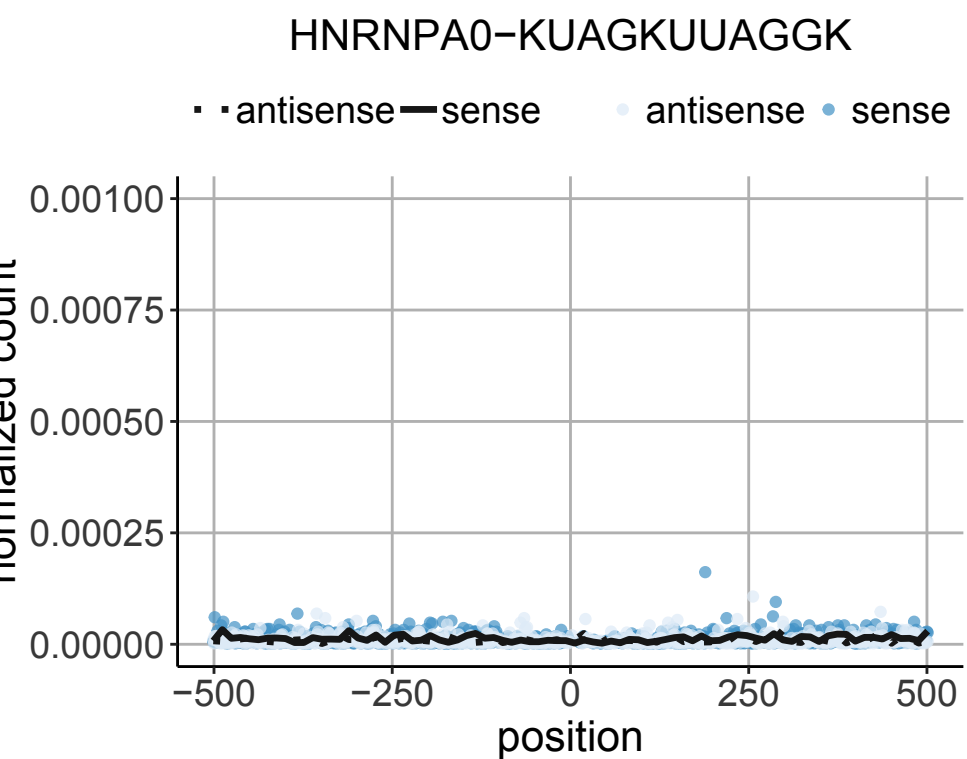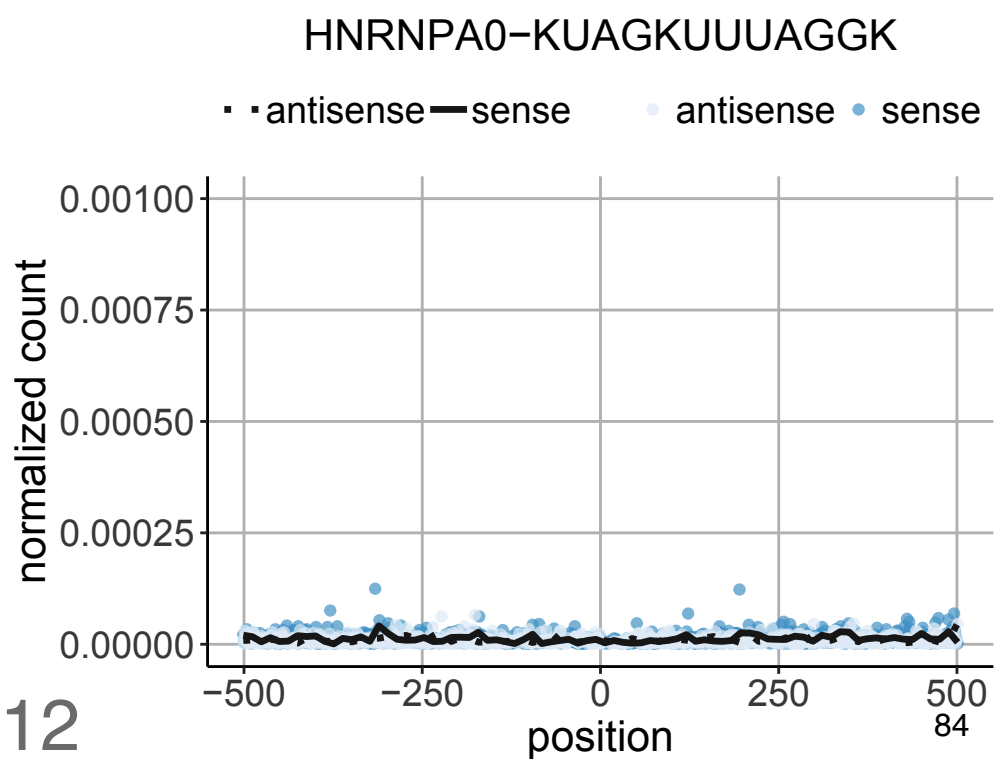

## SNRPA-CAUUGCACN

start codon

▪ antisense — sense    • antisense • sense

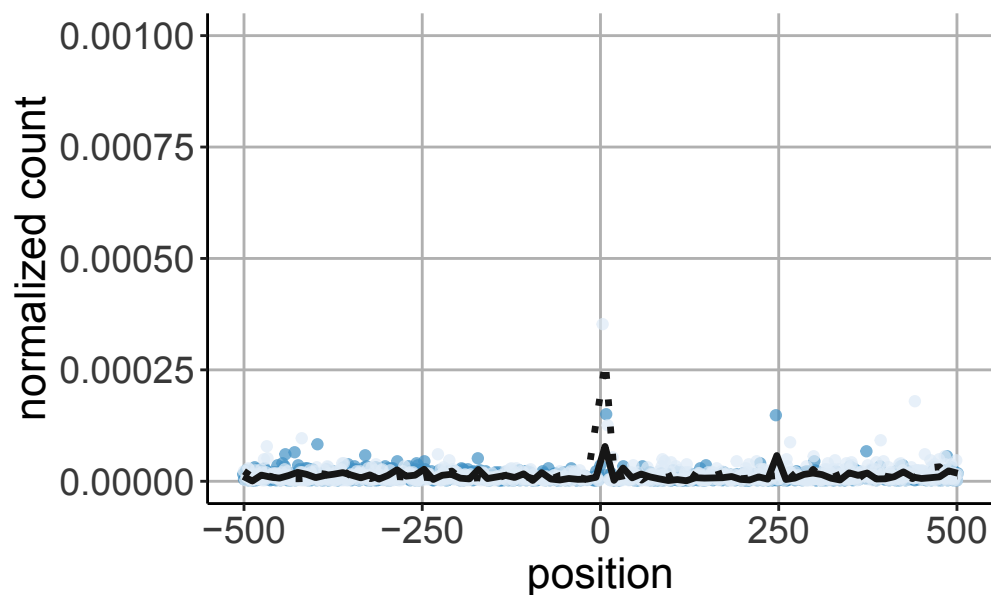

## SNRPA-NUGCACR

▪ antisense — sense    • antisense • sense

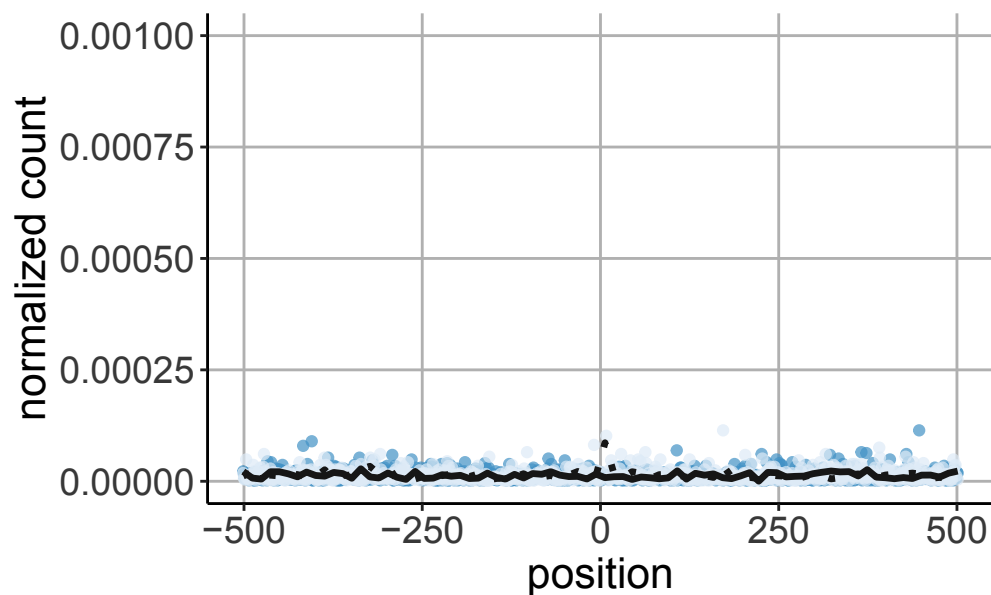

## MEX3B\_3-UAGAGUUUUAU

▪ antisense — sense    • antisense • sense

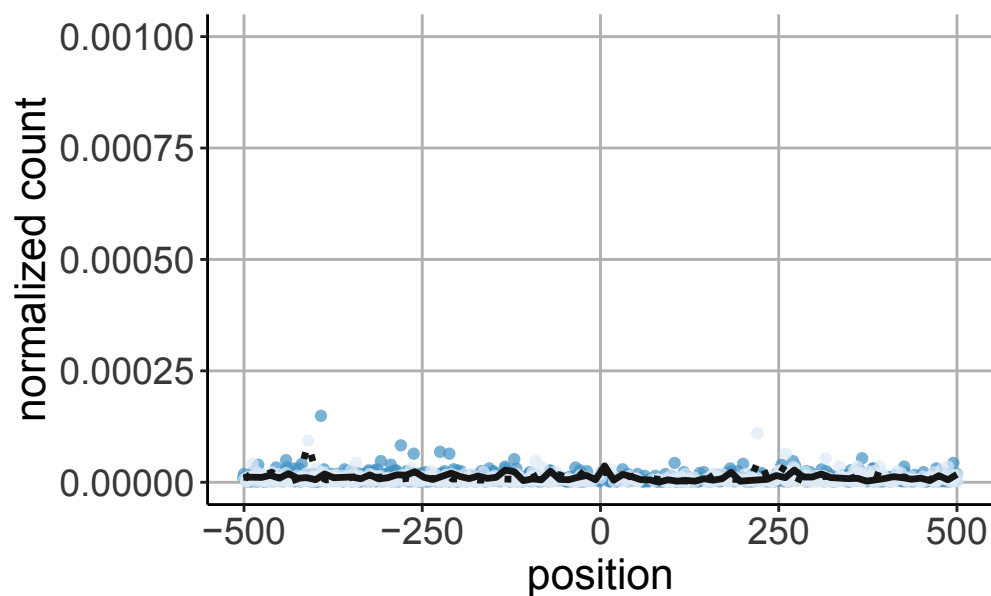

## MEX3B\_3-UAUUUUAU

▪ antisense — sense    • antisense • sense

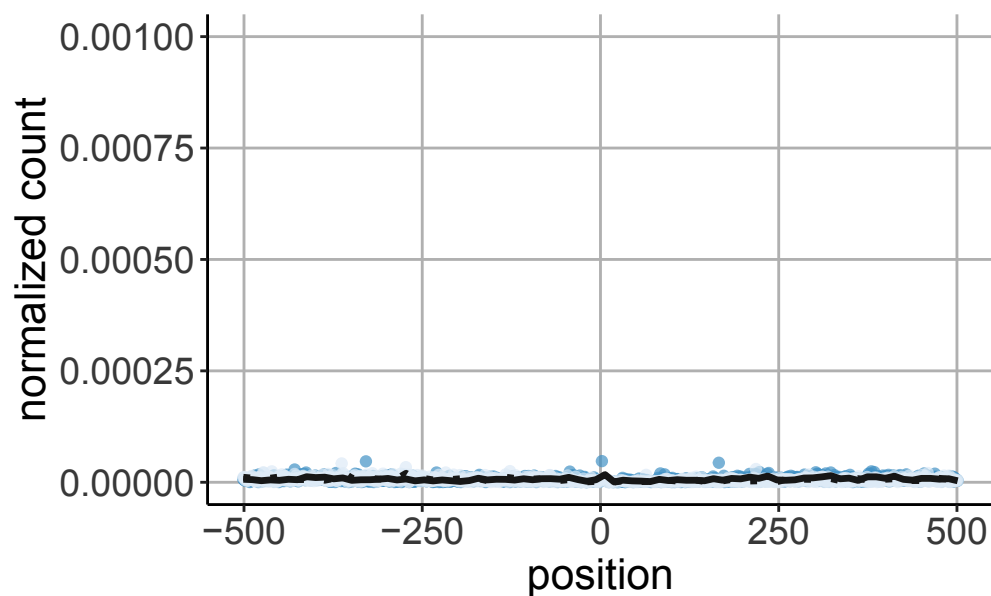

## KHDRBS2-UAAACAAUAA

▪ antisense — sense    • antisense • sense

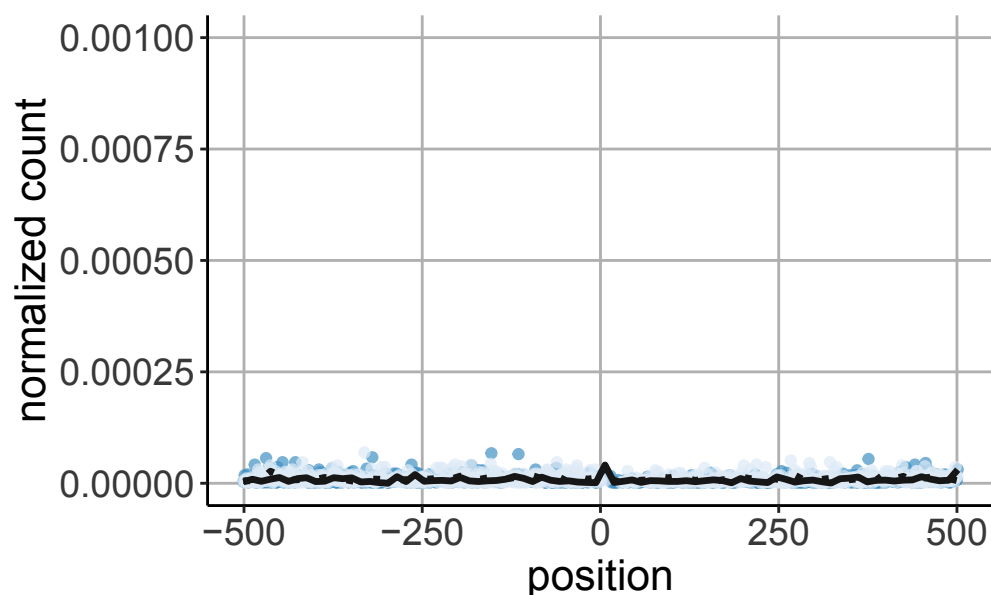

## CELF3\_2-UGUGUNUGUGU

▪ antisense — sense    • antisense • sense

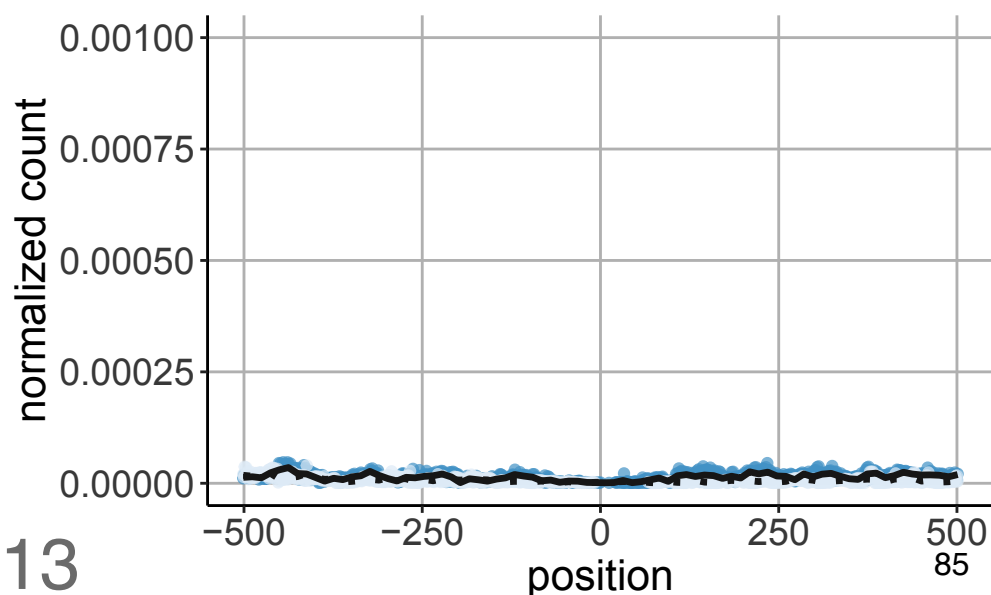

RNPC3-GGGDDGGGDKUACKKGGK

start codon

• antisense — sense • antisense • sense

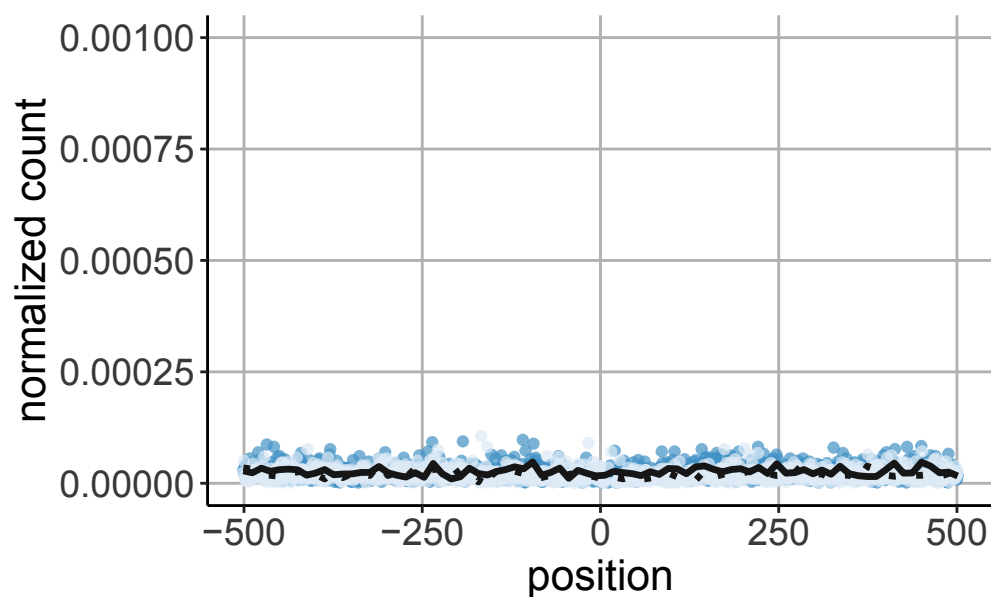

RBM14-UGCGUCG

• antisense — sense • antisense • sense

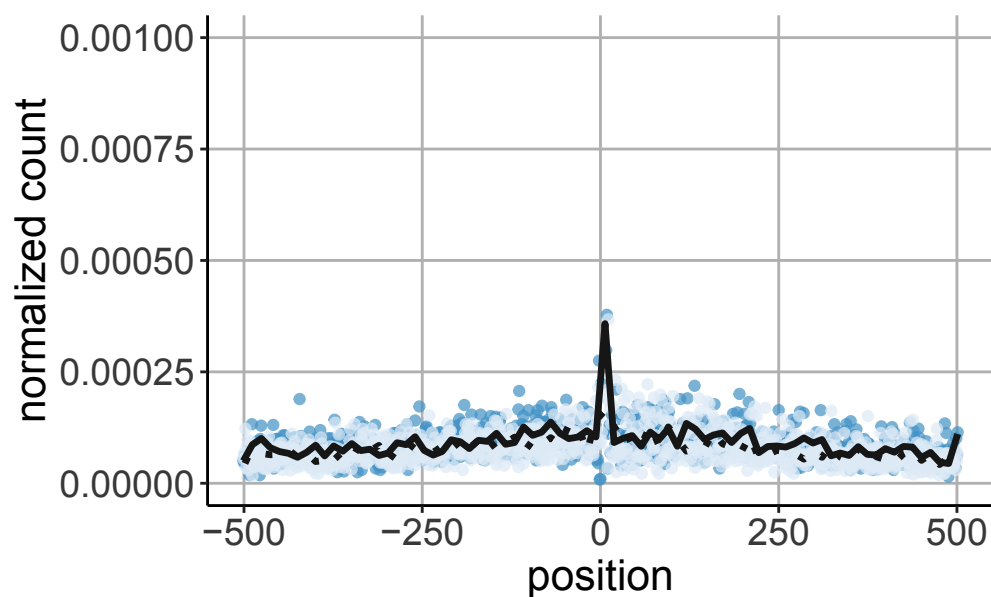

CELF4-UGUGUUGUGU

• antisense — sense • antisense • sense

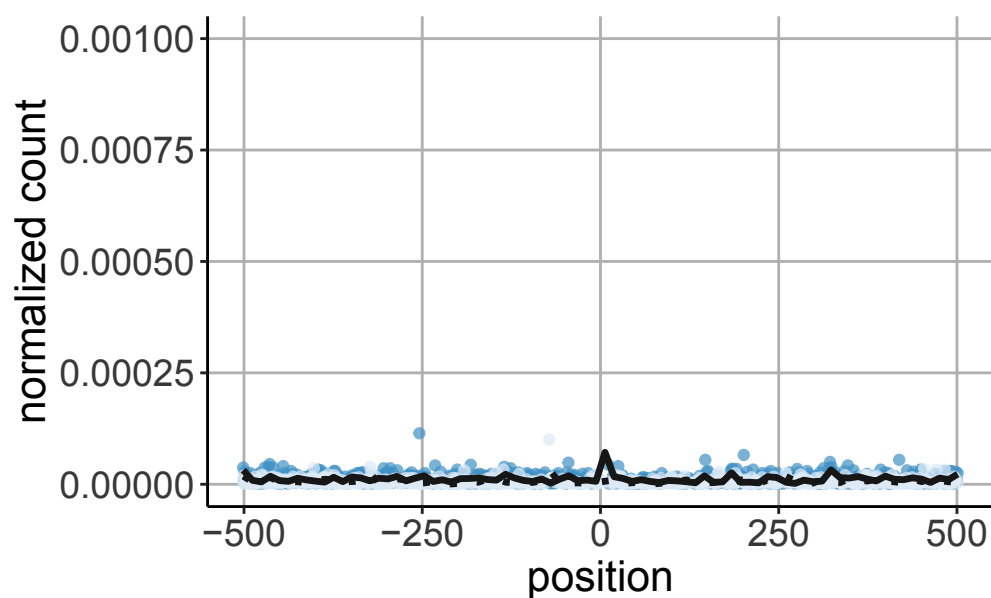

ZRANB2-NNNGGUAAGGUNN

• antisense — sense • antisense • sense

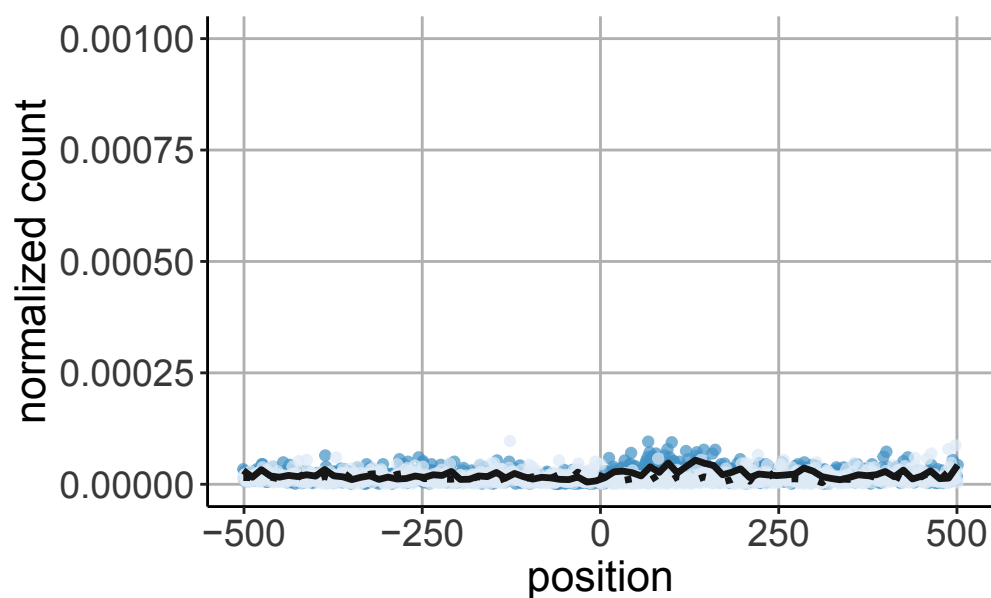

RBM4-CGGGGURUGN

• antisense — sense • antisense • sense

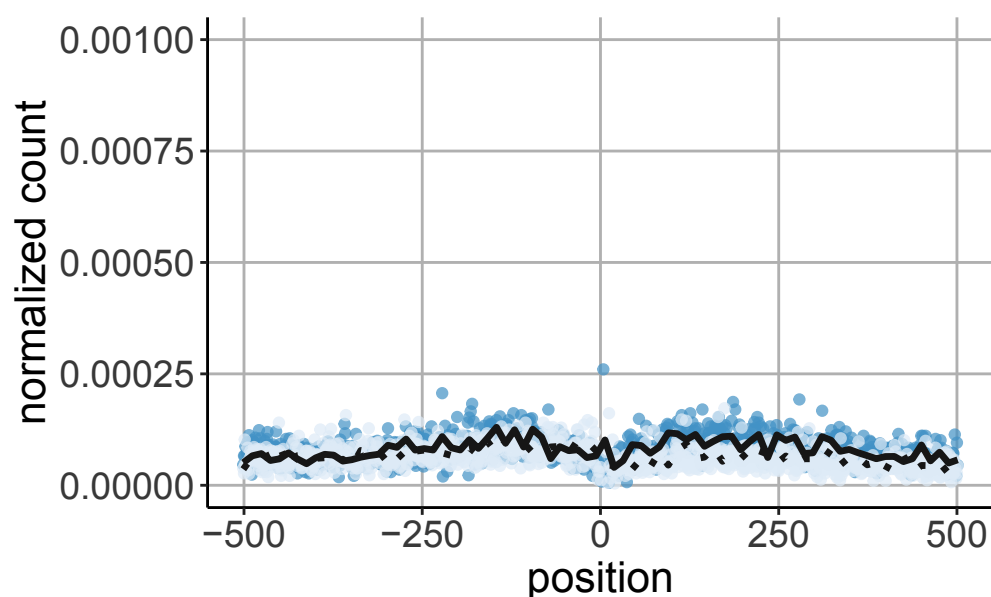

RBPMS-NAGGCACR

• antisense — sense • antisense • sense

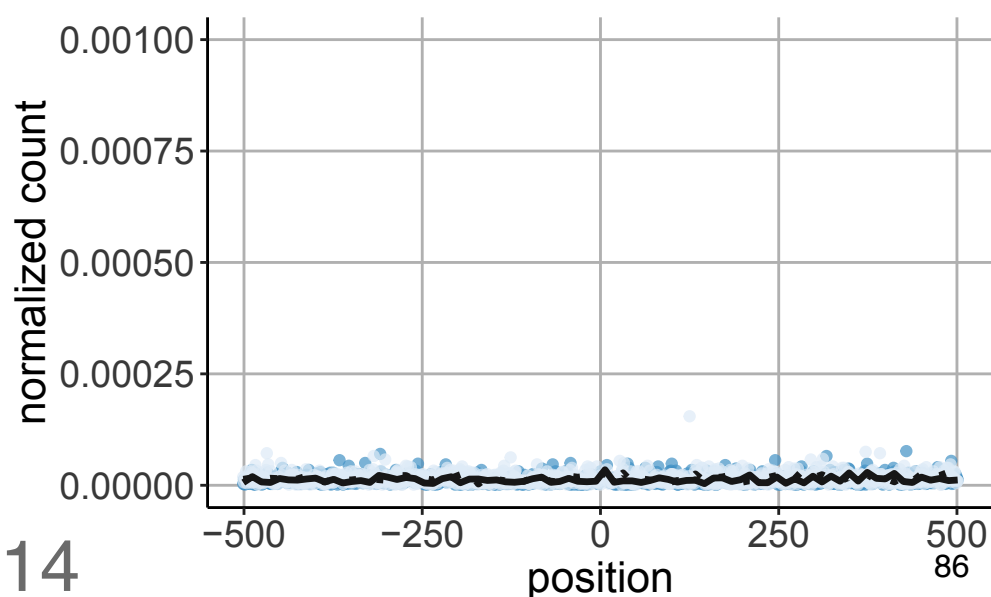

start codon

RBPMS-UCACGNGCACN

• antisense — sense • antisense • sense

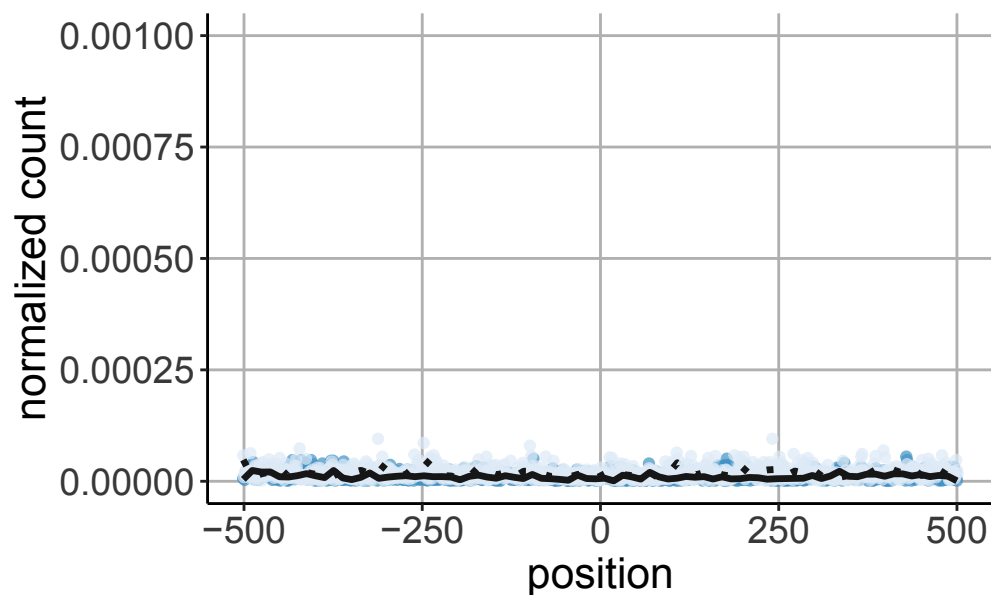

CELF1\_2-UGUGUNUGUGU

• antisense • sense

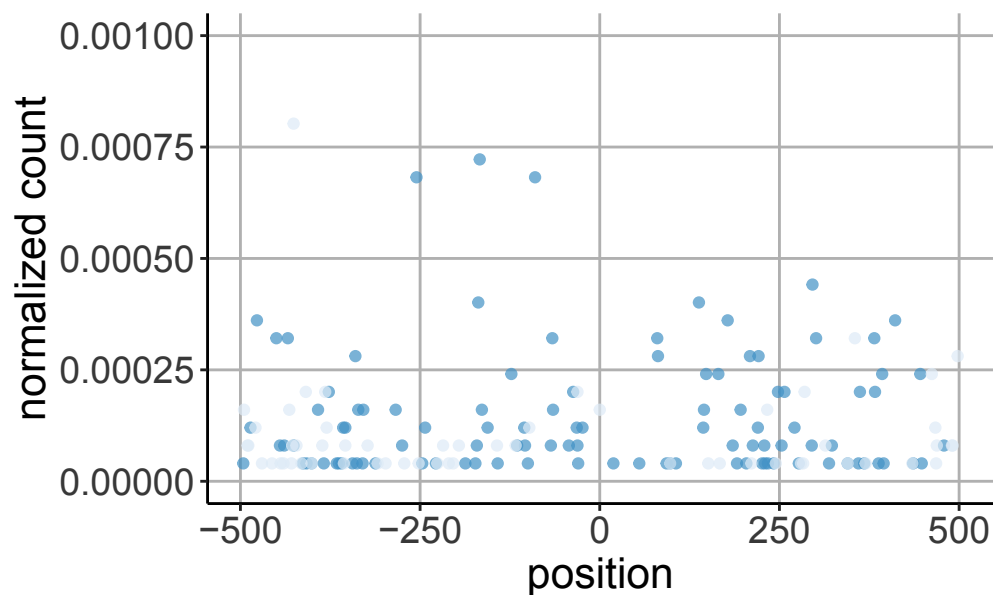

CSTF2-RRGGCGUAGCGUNN

• antisense — sense • antisense • sense

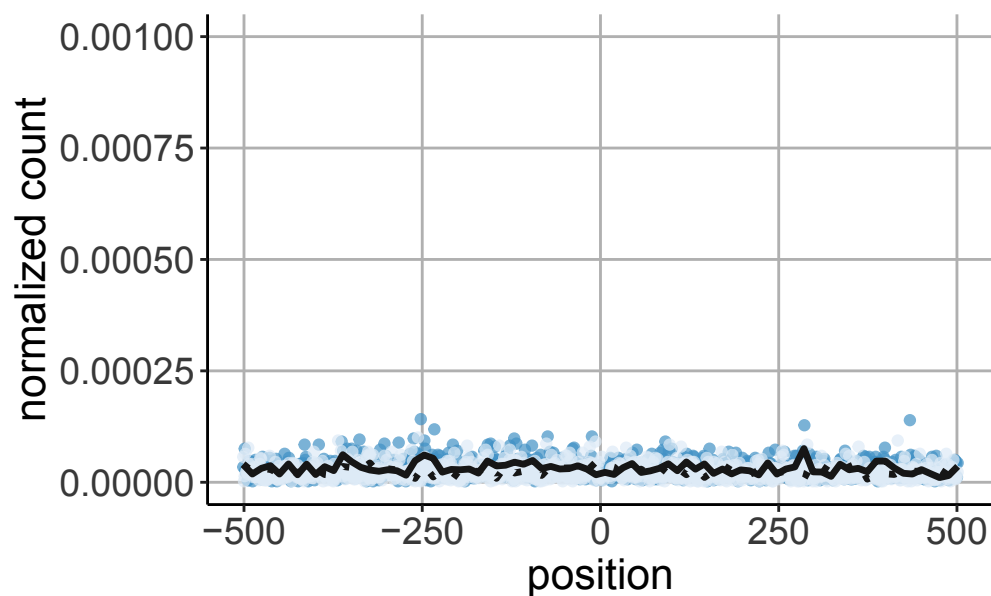

RBM28-GRGGCCGNGCGGUGG

• antisense — sense • antisense • sense

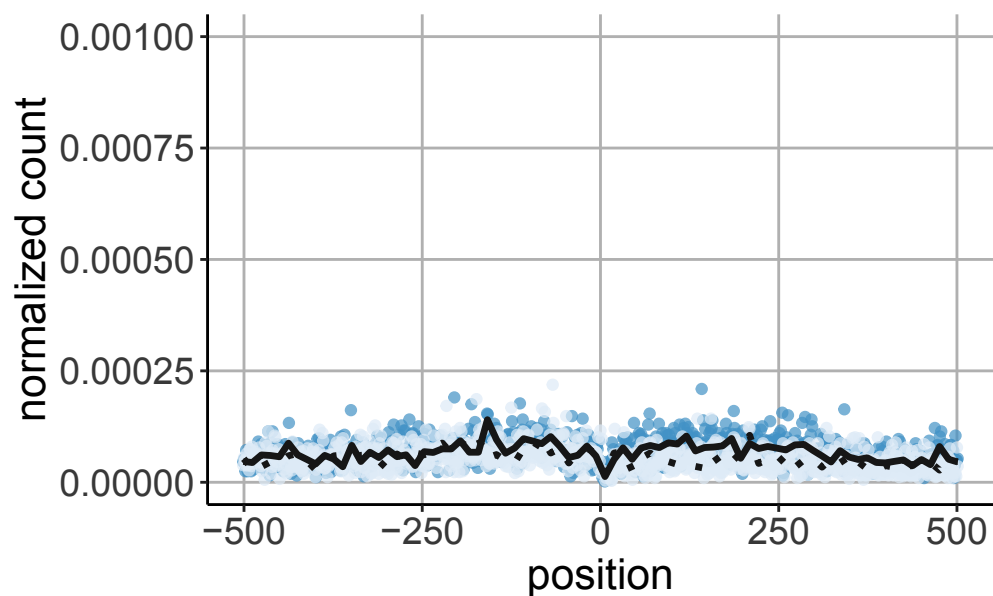

RBM28-GUGGGUCUCGG

• antisense — sense • antisense • sense

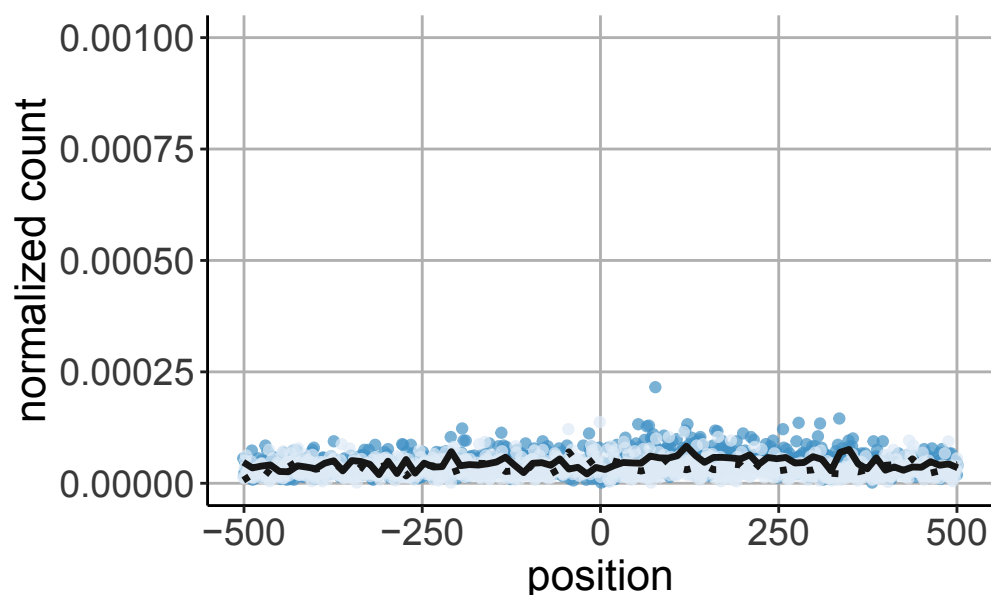

ZC3H10-GCGCAUGCGNN

• antisense — sense • antisense • sense

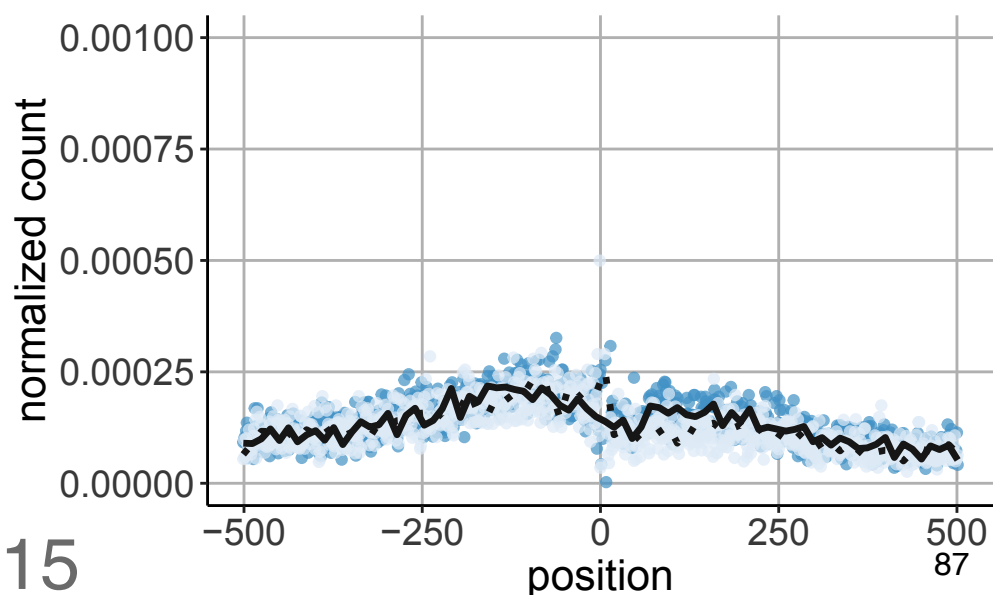



ZC3H10-NGCGCAGCGUN

start codon

• antisense — sense • antisense • sense

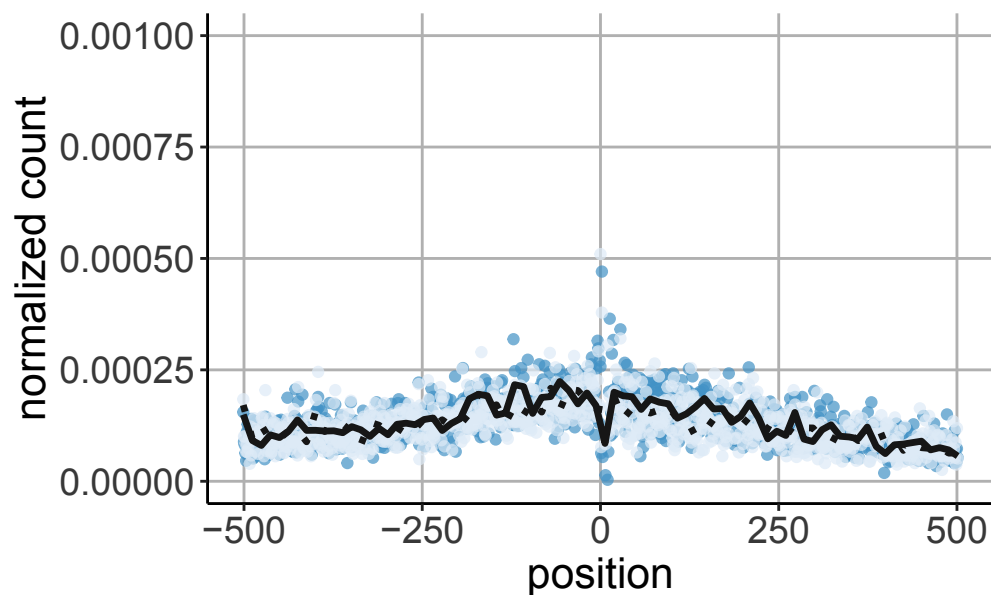

RBFOX1\_2-GCAUGNNGCAUG

• antisense — sense • antisense • sense

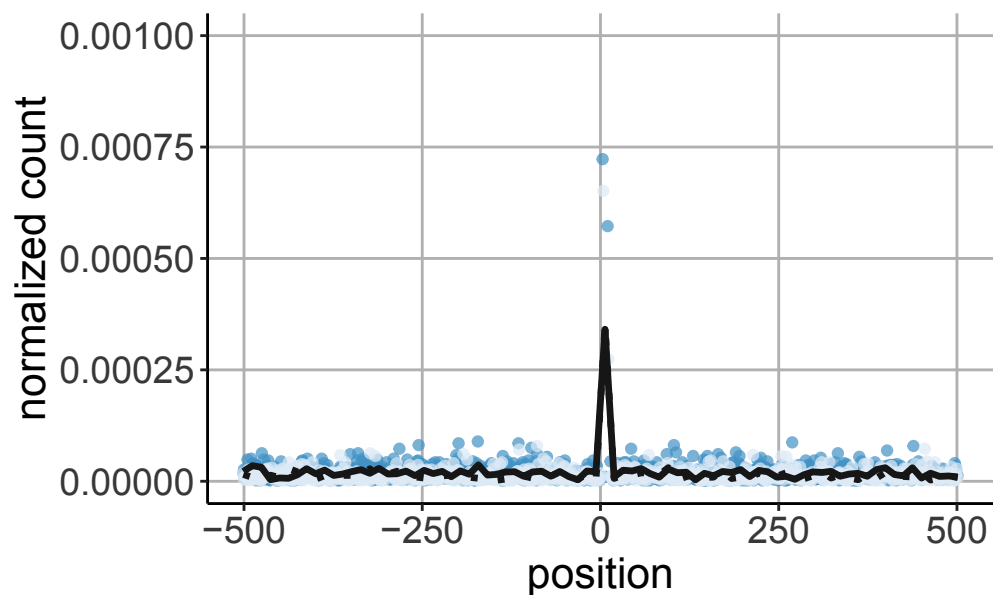

MSI1-KUAGUWKUAGK

• antisense — sense • antisense • sense

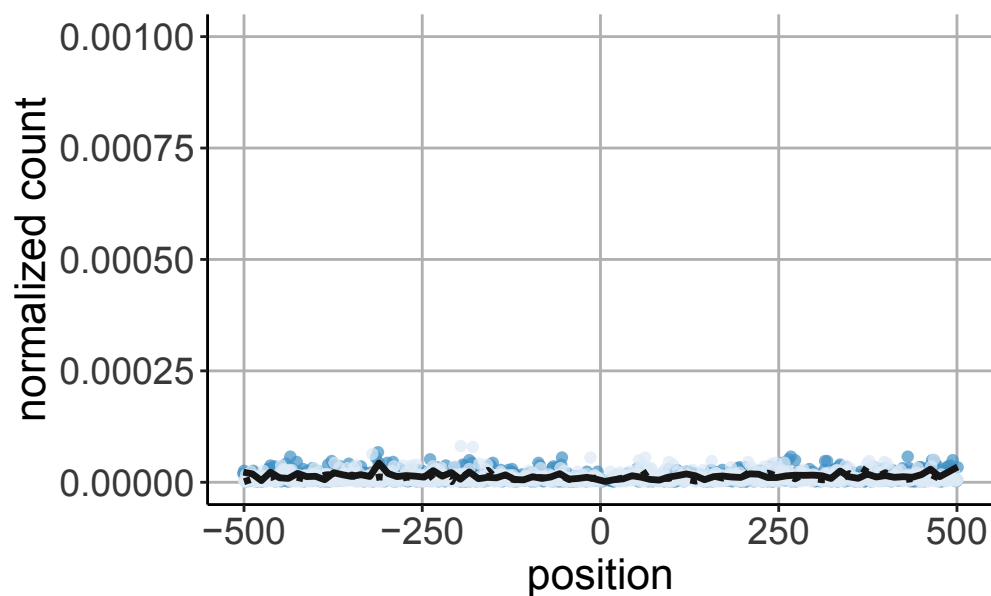

HEXIM1-GKDKCGACGGK

• antisense — sense • antisense • sense

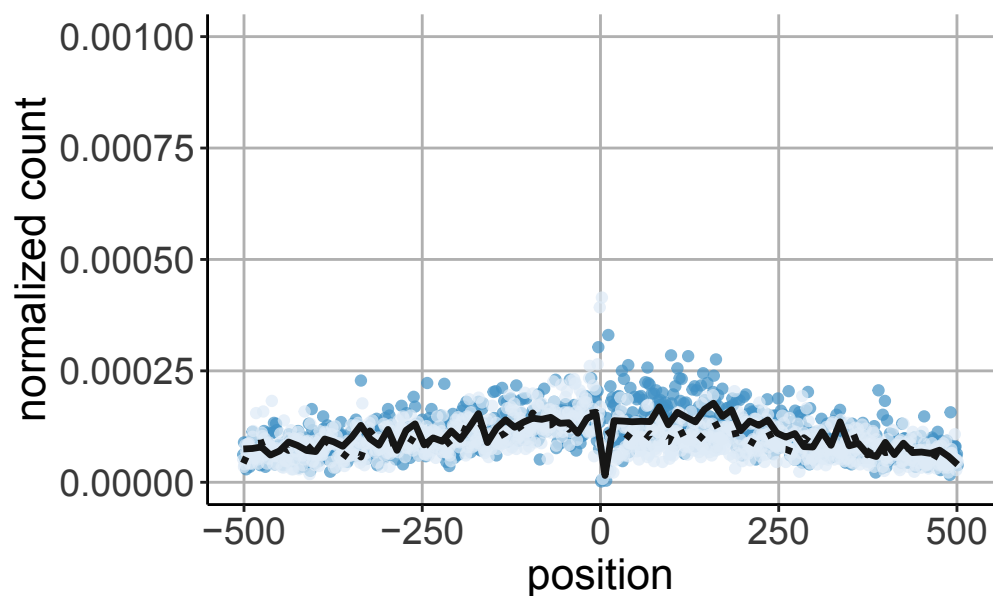

SART3-NGUUAGCRK

• antisense — sense • antisense • sense

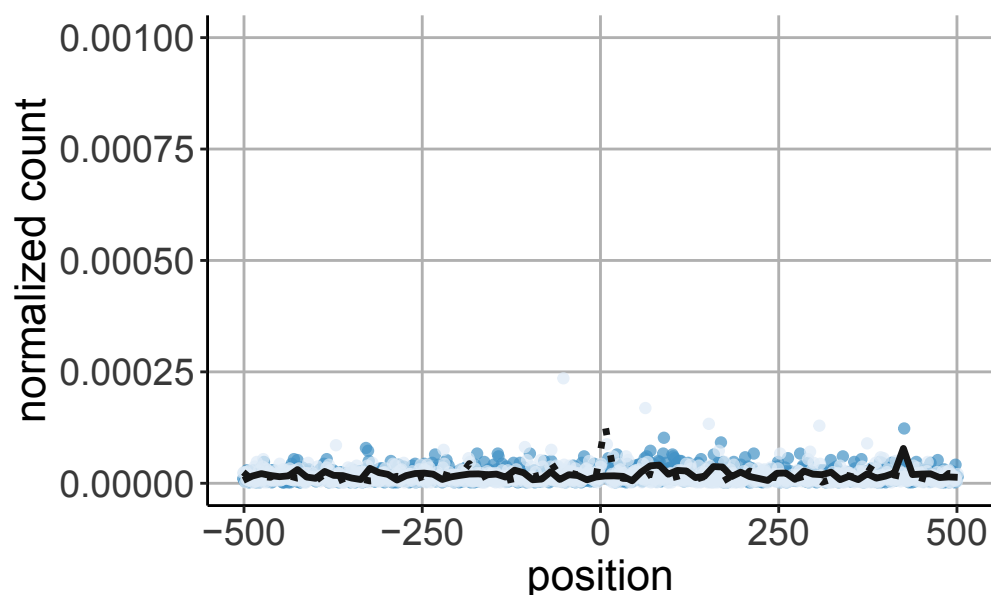

MSI2-GUAGUGDGUAGK

• antisense — sense • antisense • sense

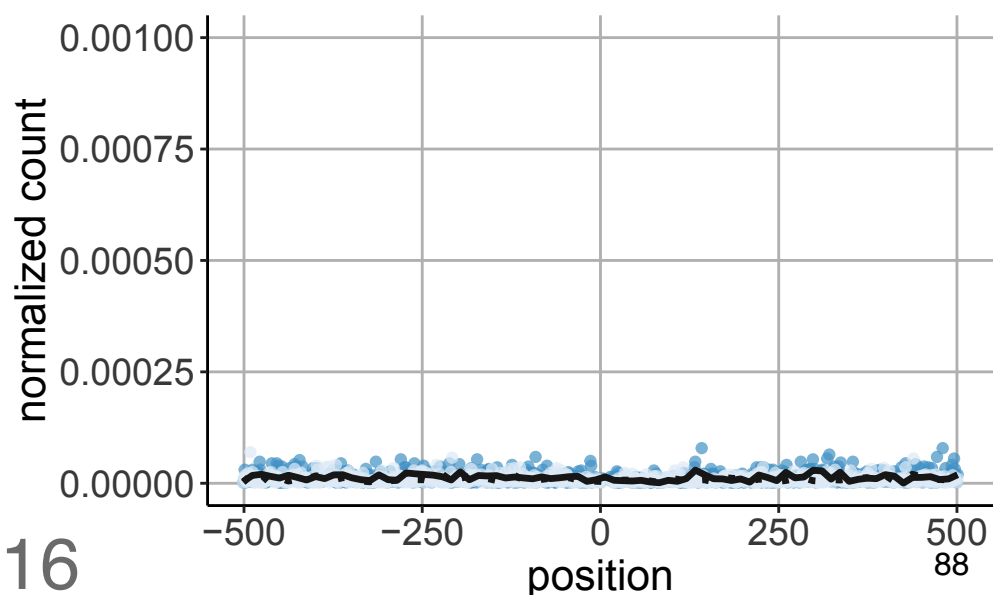

start codon

MSI2-GUAGUNNNGUAGK

• antisense — sense • antisense • sense

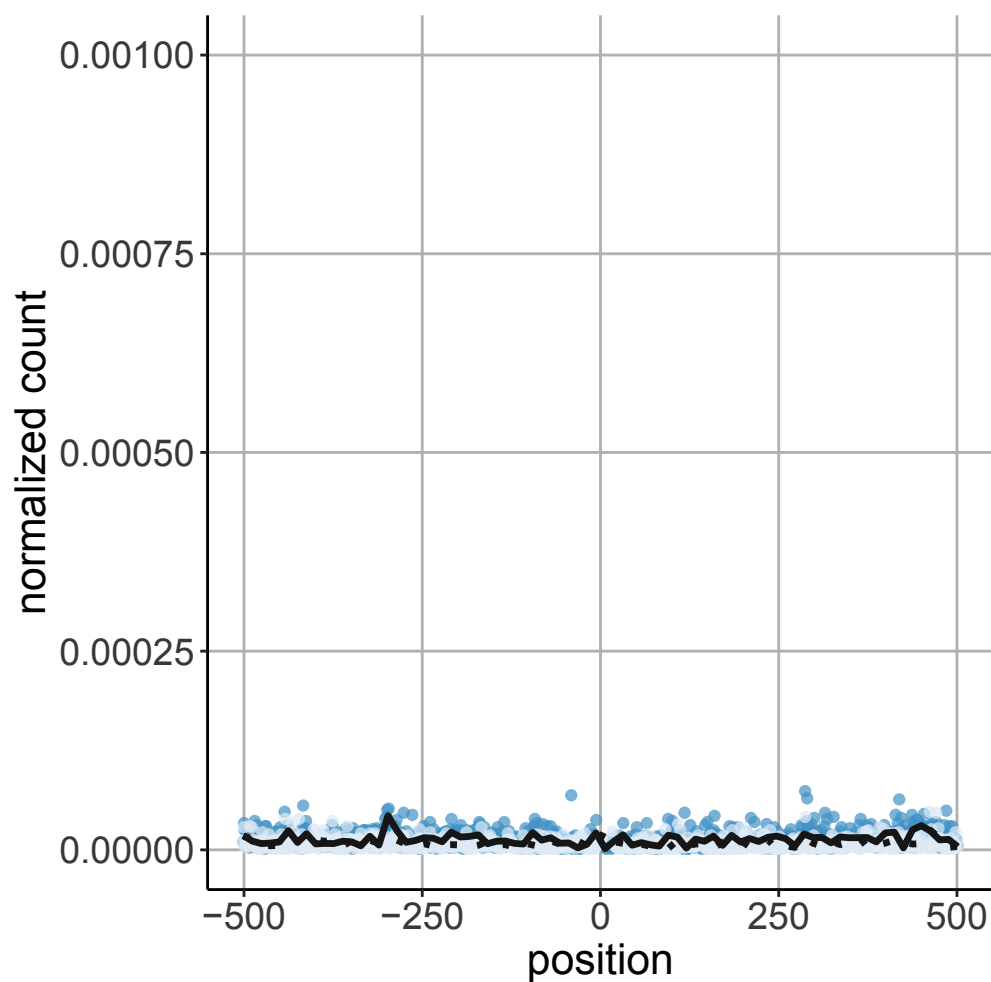

ZCRB1-GNNUUAAKK

• antisense — sense • antisense • sense

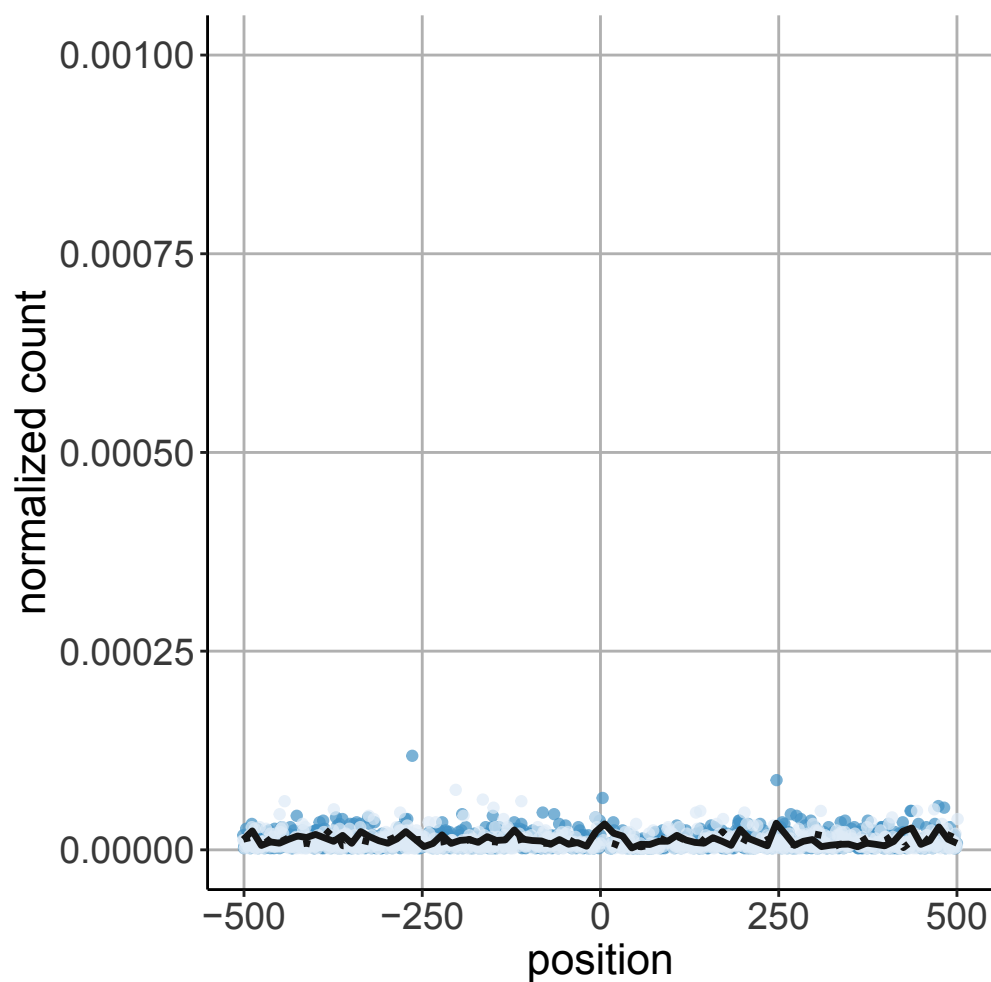

ZCRB1-GUGGACUUA

• antisense — sense • antisense • sense

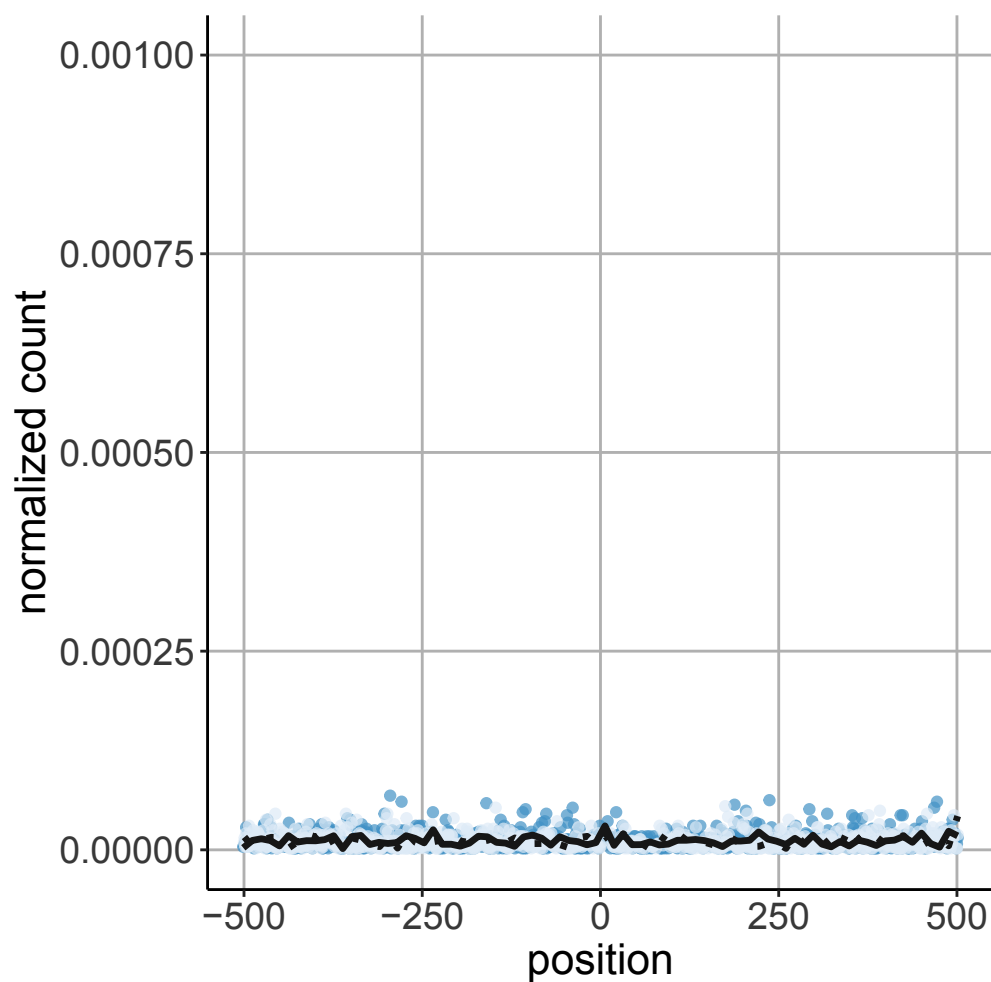

LARP6-GUGUCNNNNNNNNNGAAGUCN

• antisense — sense • antisense • sense

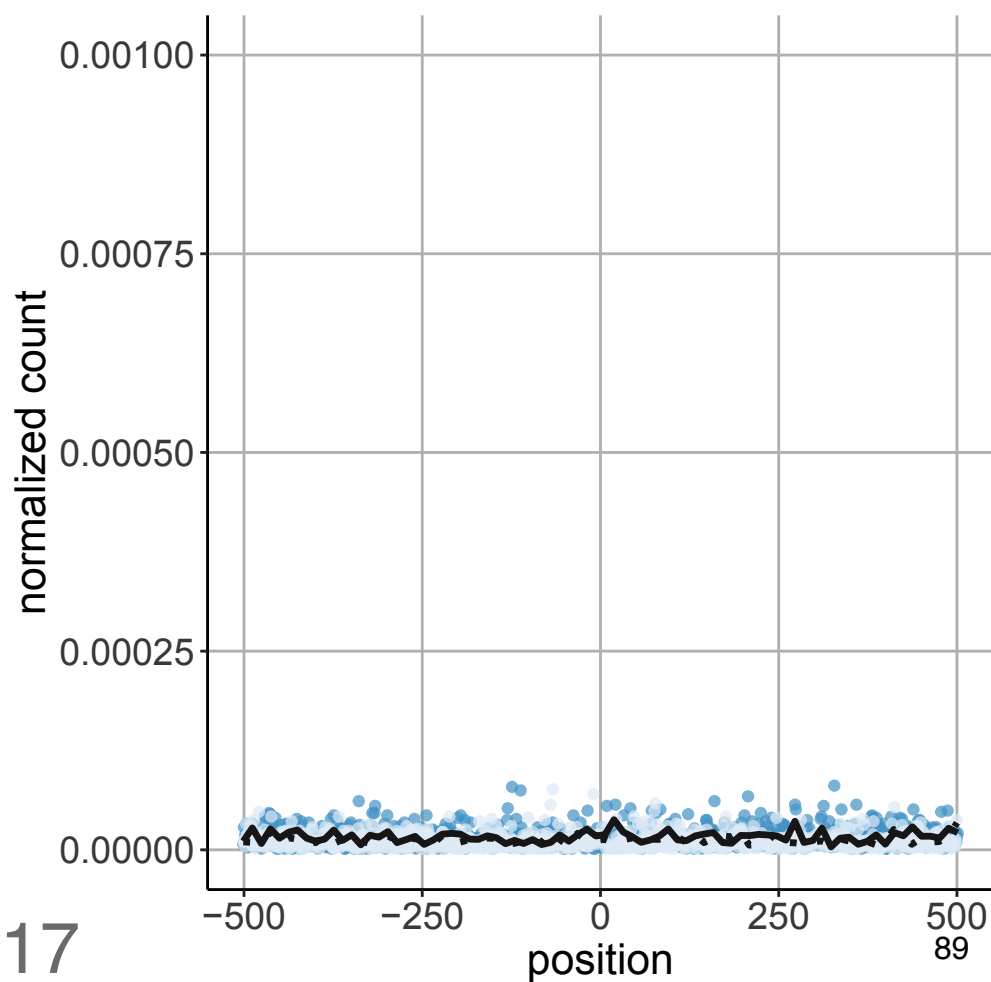

start codon DAZ1\_2-NNUGUGUGSGUUUCCGSN

• antisense — sense • antisense • sense

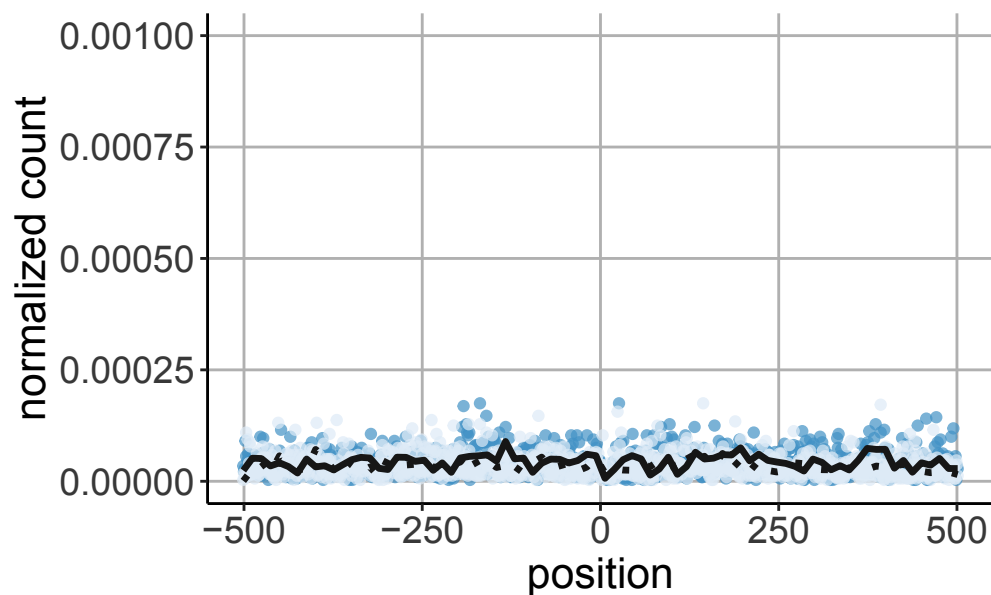

DAZ1\_2-NUGKUGUUGUAGN

• antisense — sense • antisense • sense

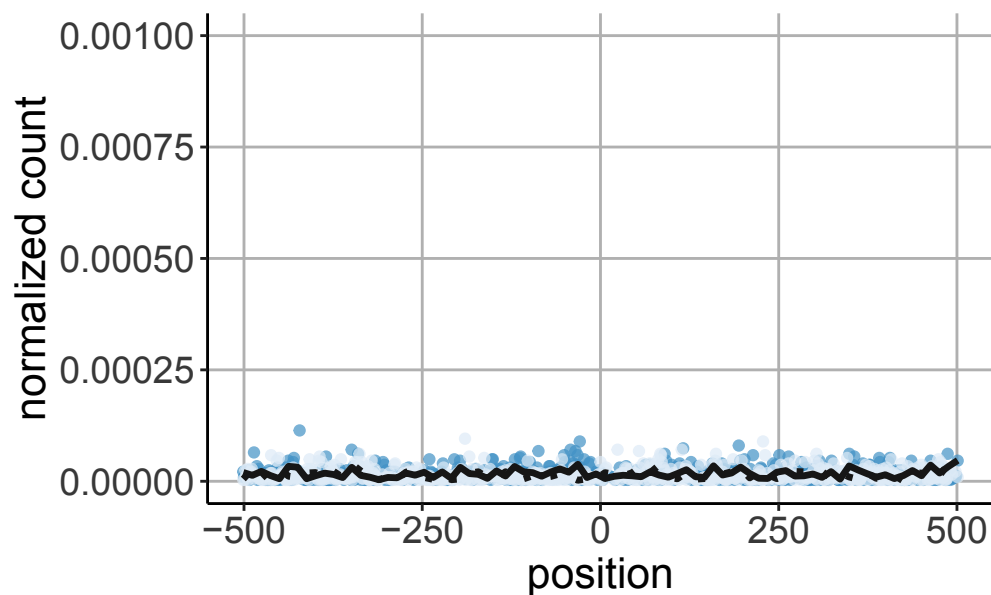

DAZ1\_2-CRNAAUGUUAGUAGN

• antisense — sense • antisense • sense

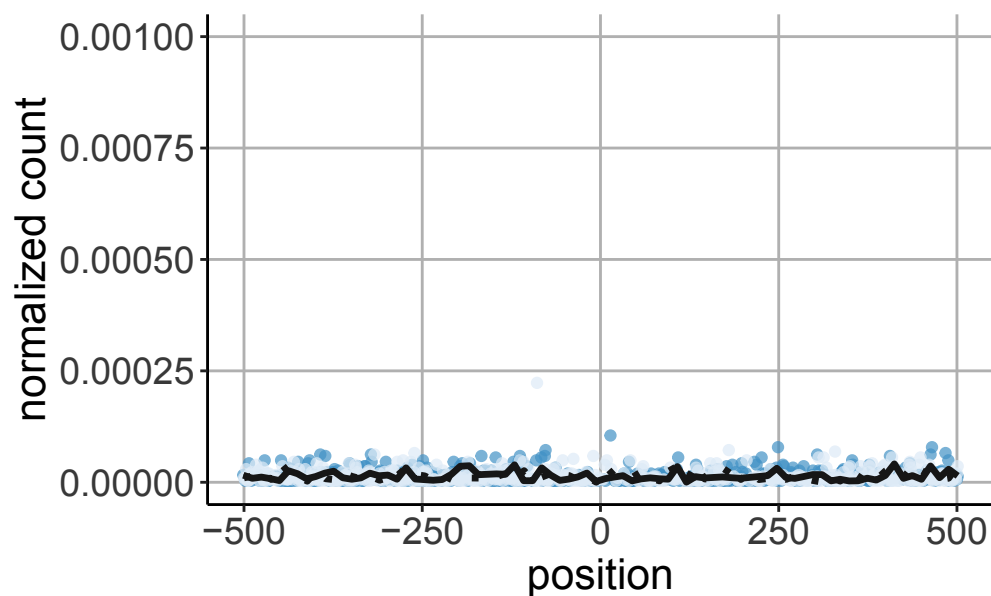

DAZ3-NNUGUGUGSGUUUCCGSN

• antisense — sense • antisense • sense

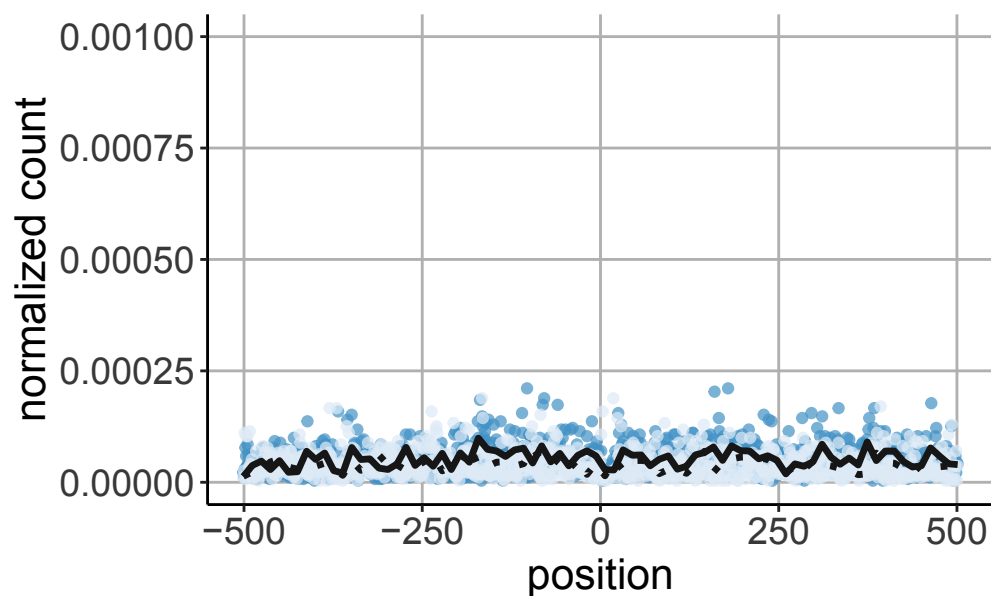

DAZ4-NNUGUGUGSGUUUCCGSN

• antisense — sense • antisense • sense

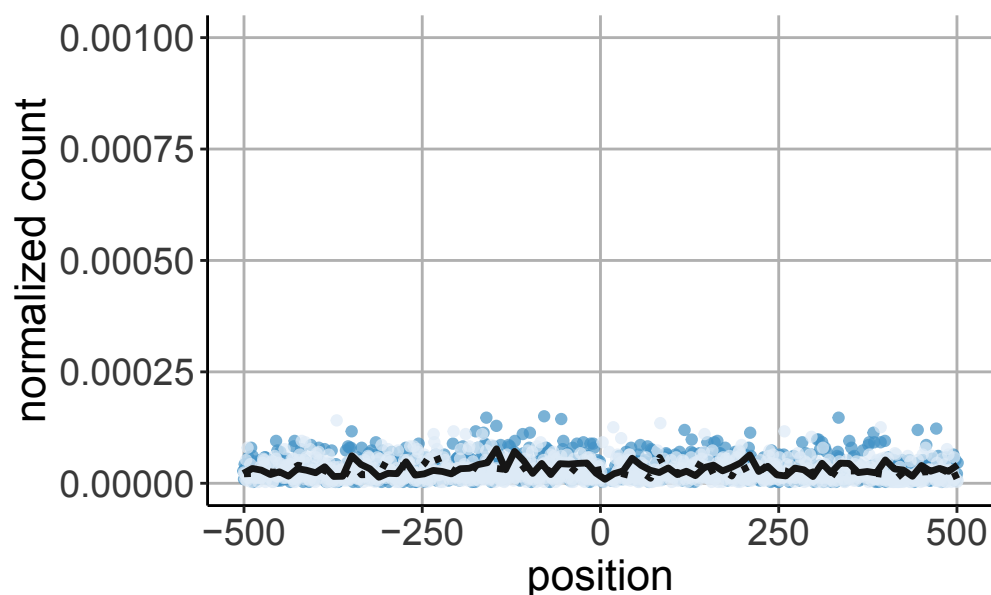

DAZ4-CUGKUGUUGUAGG

• antisense — sense • antisense • sense

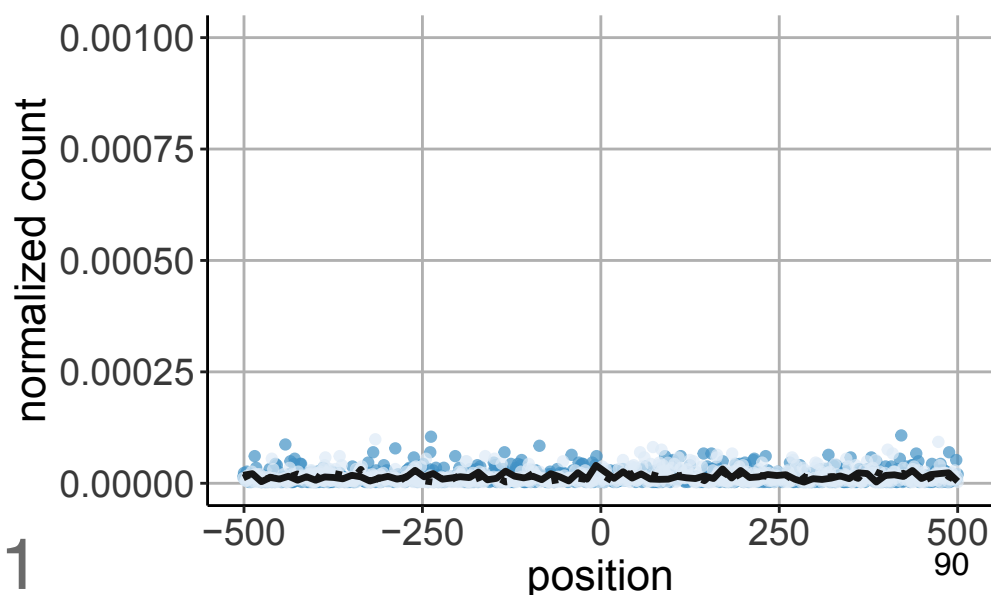

1

90

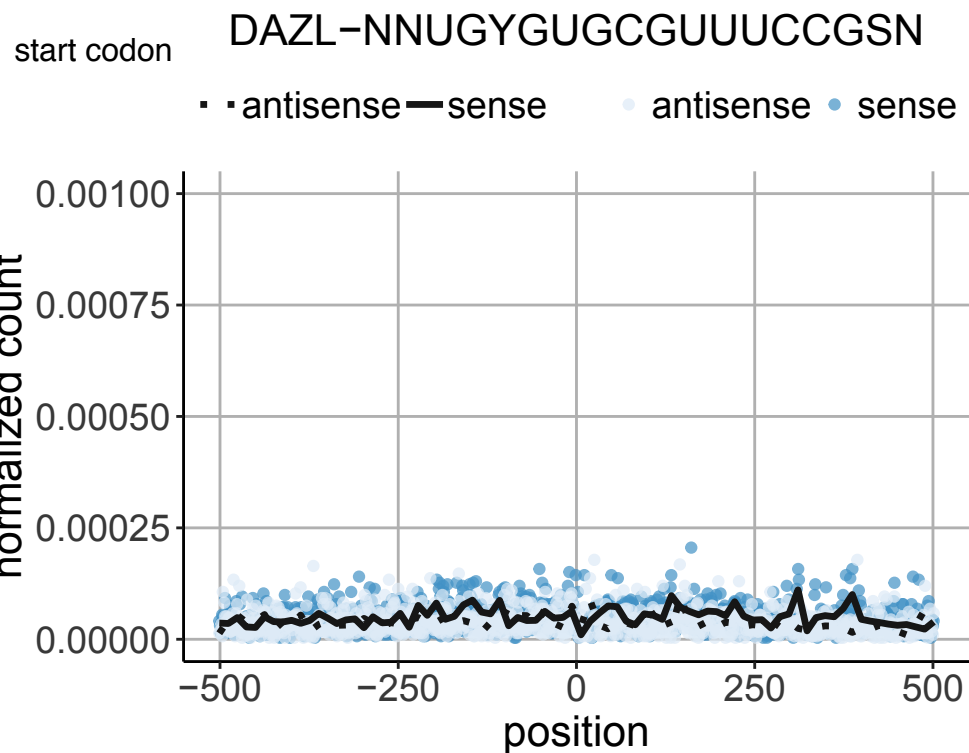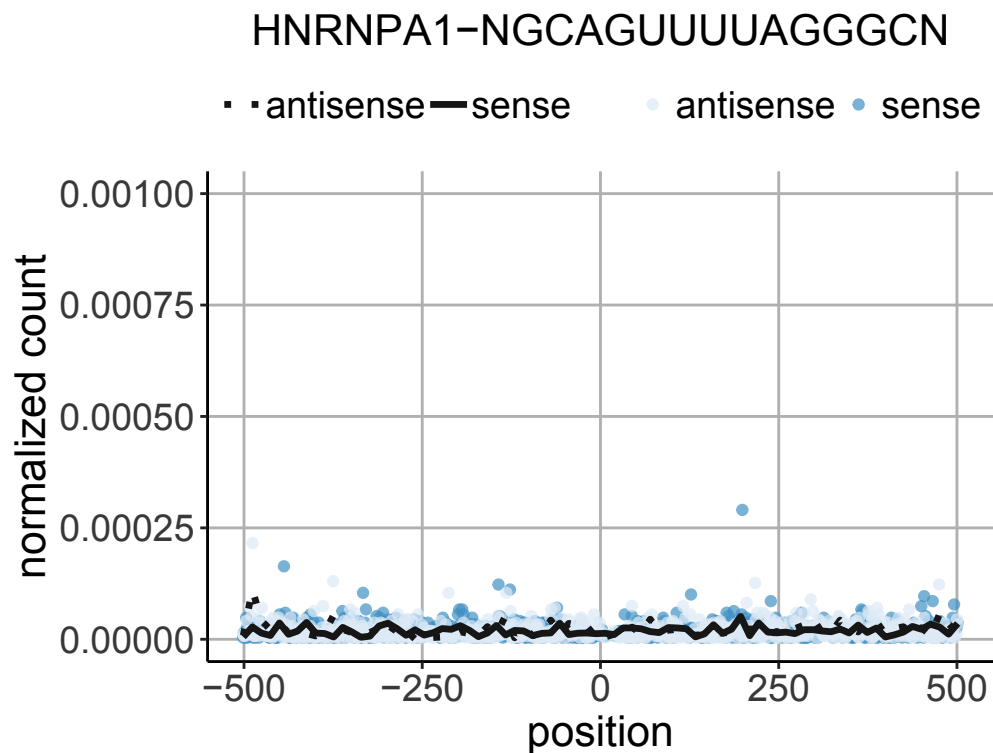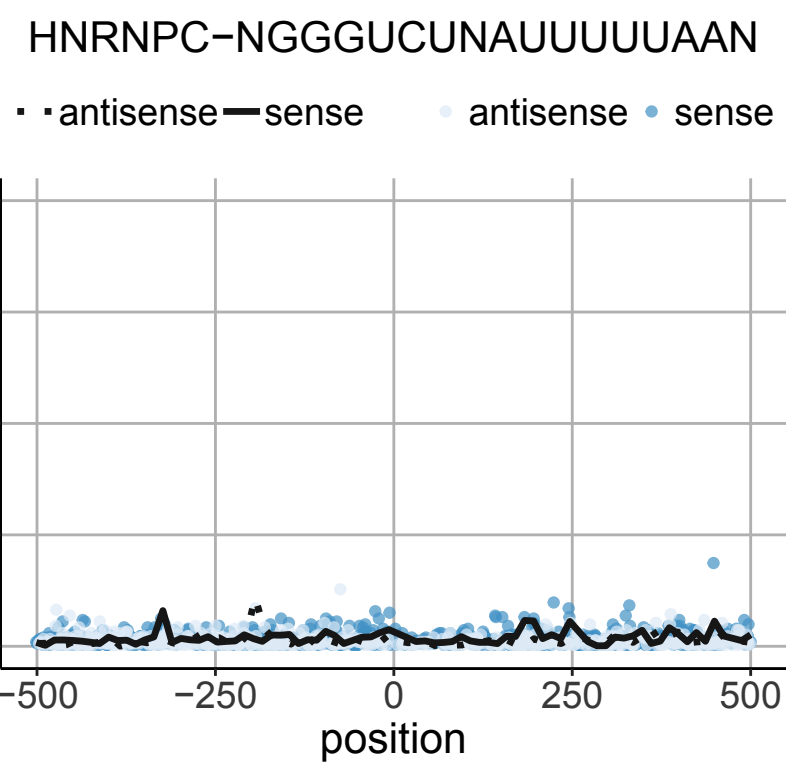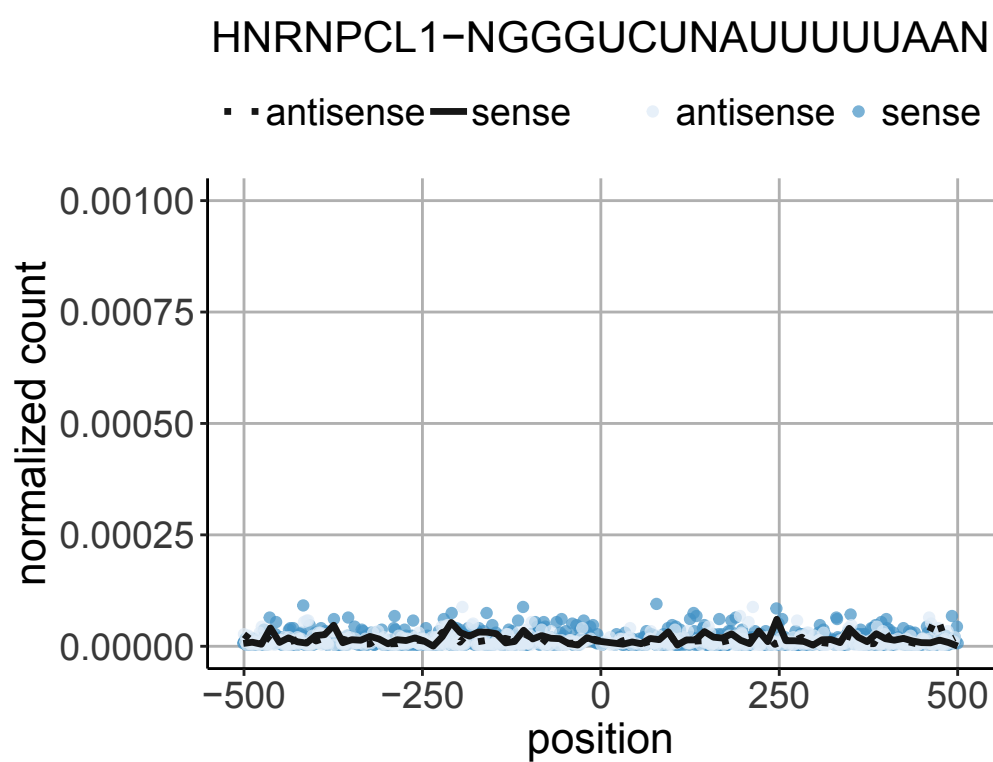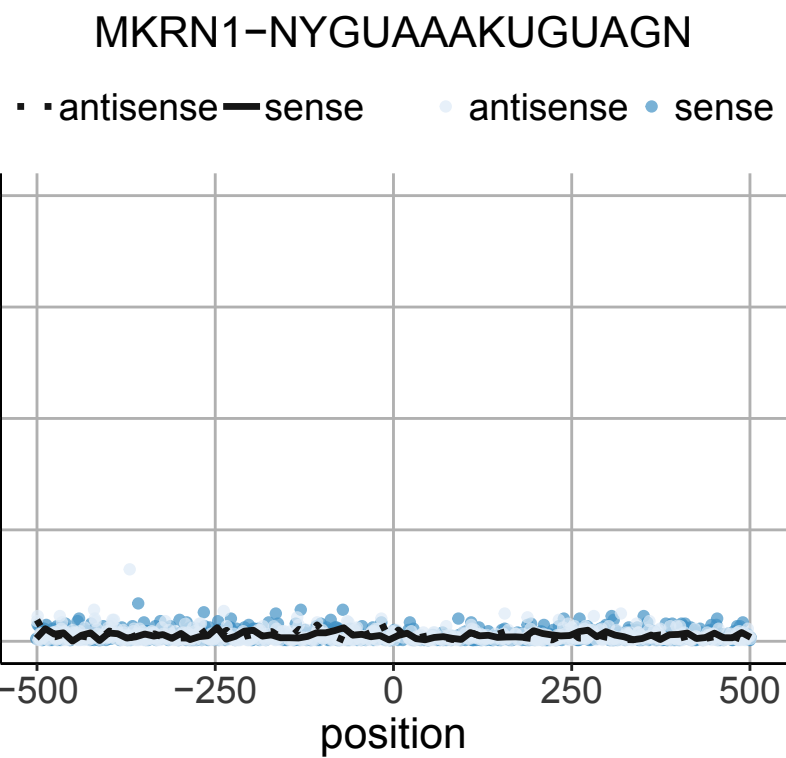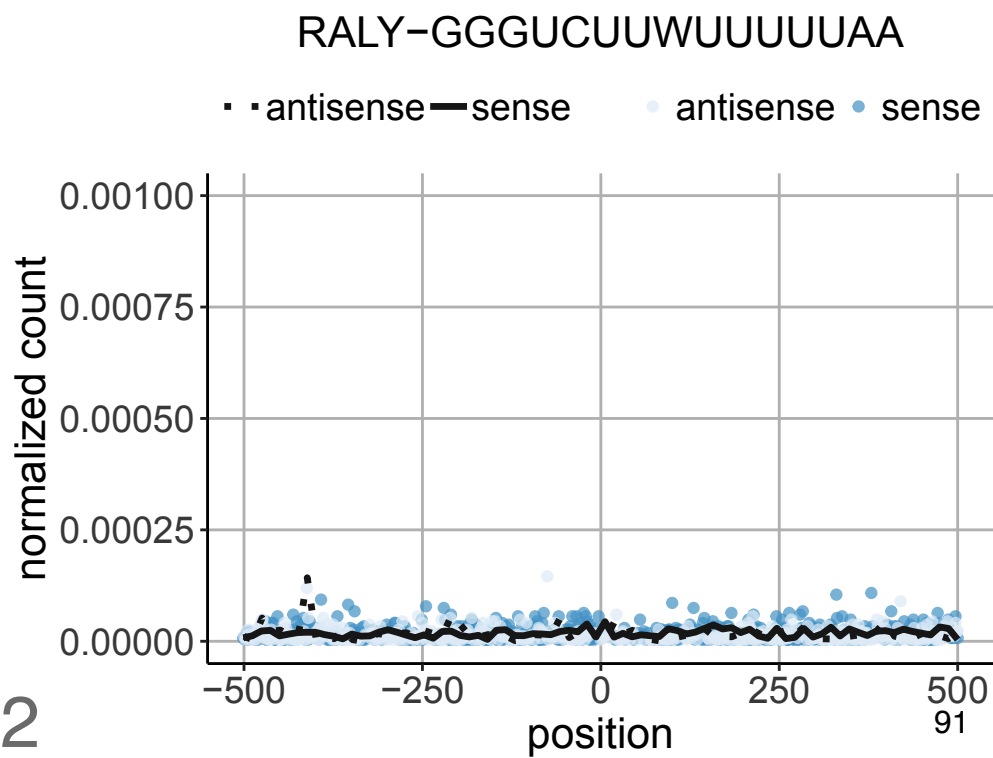

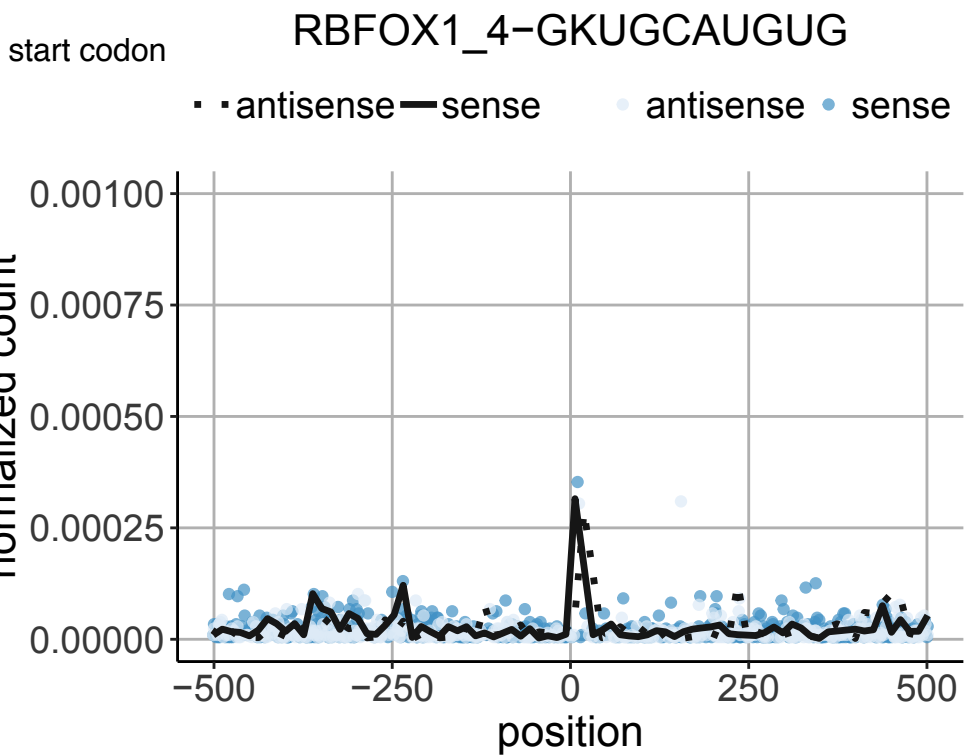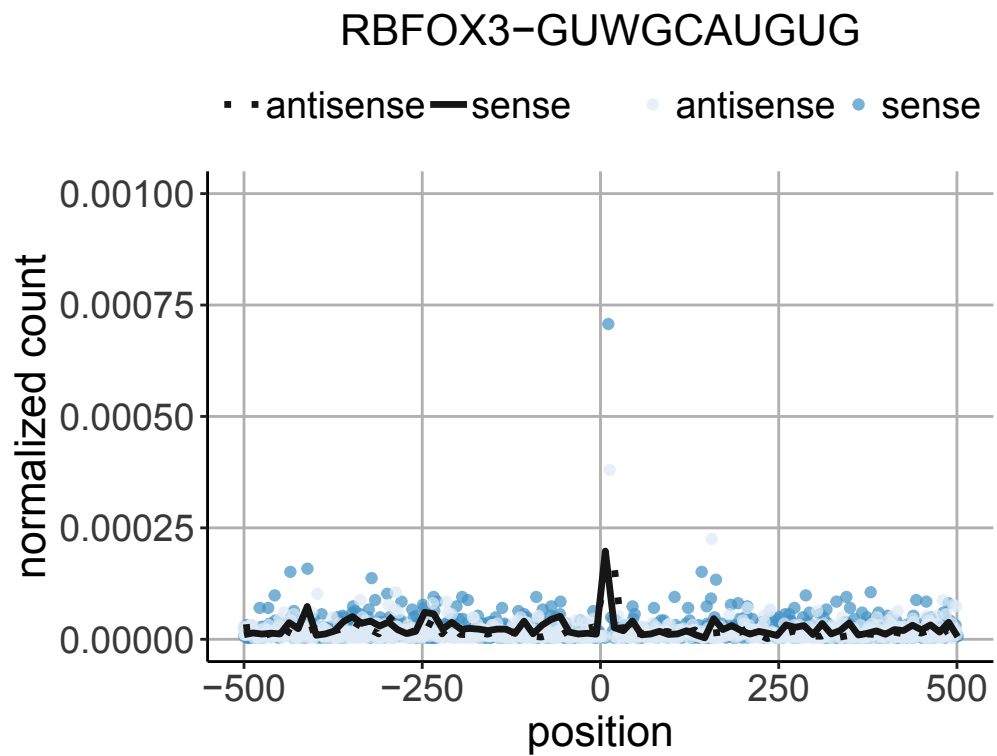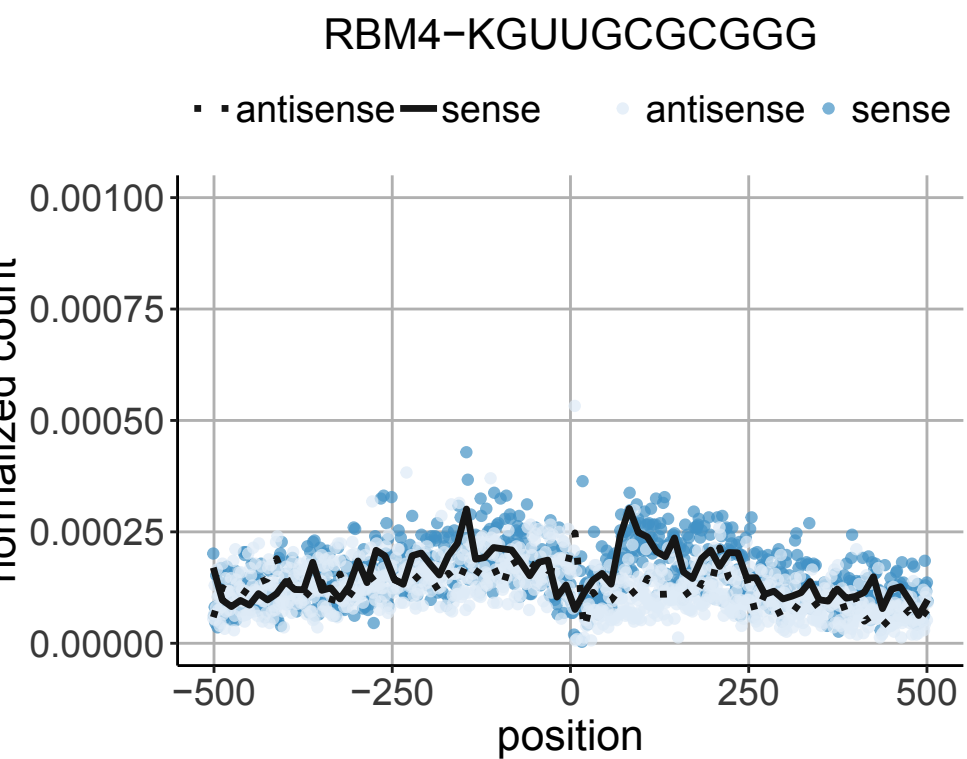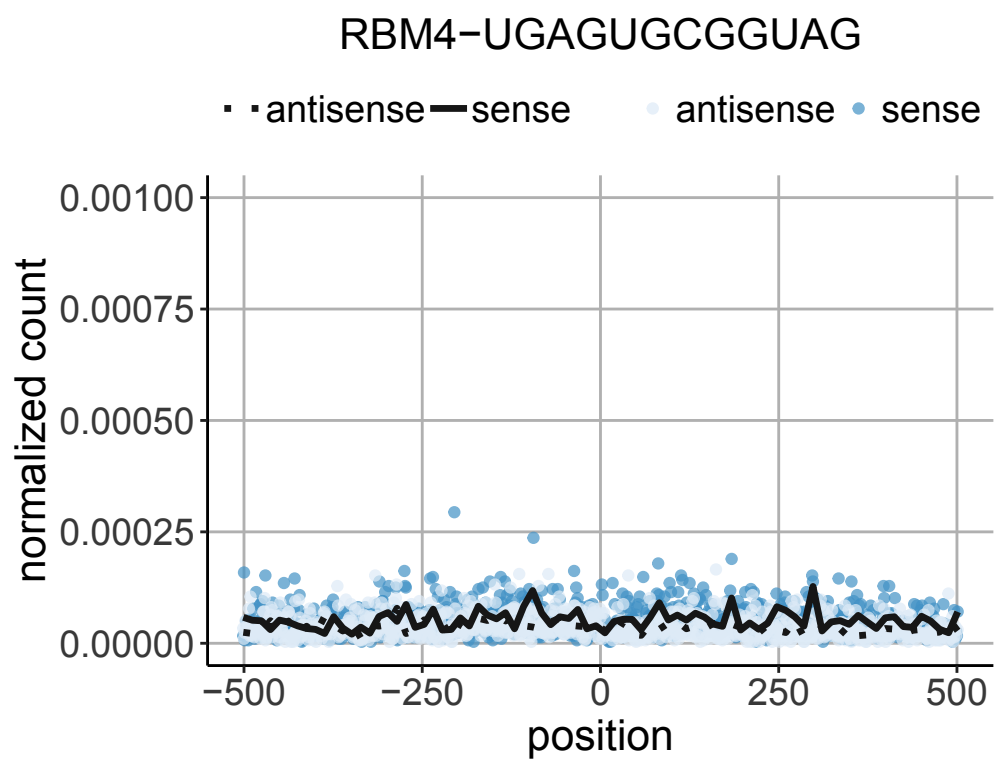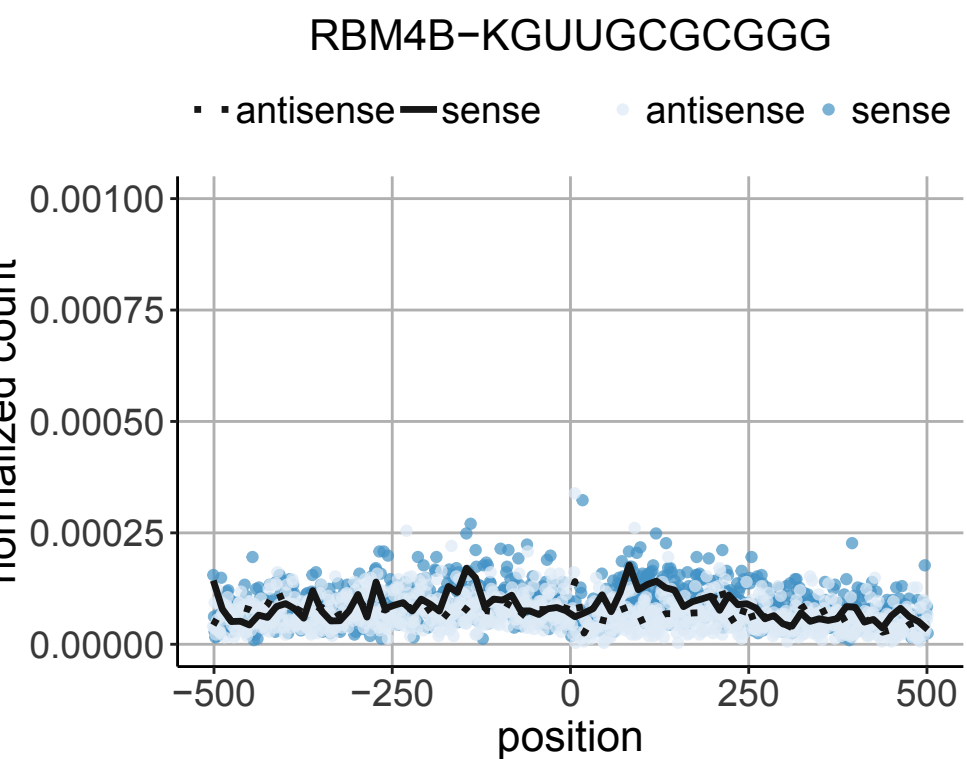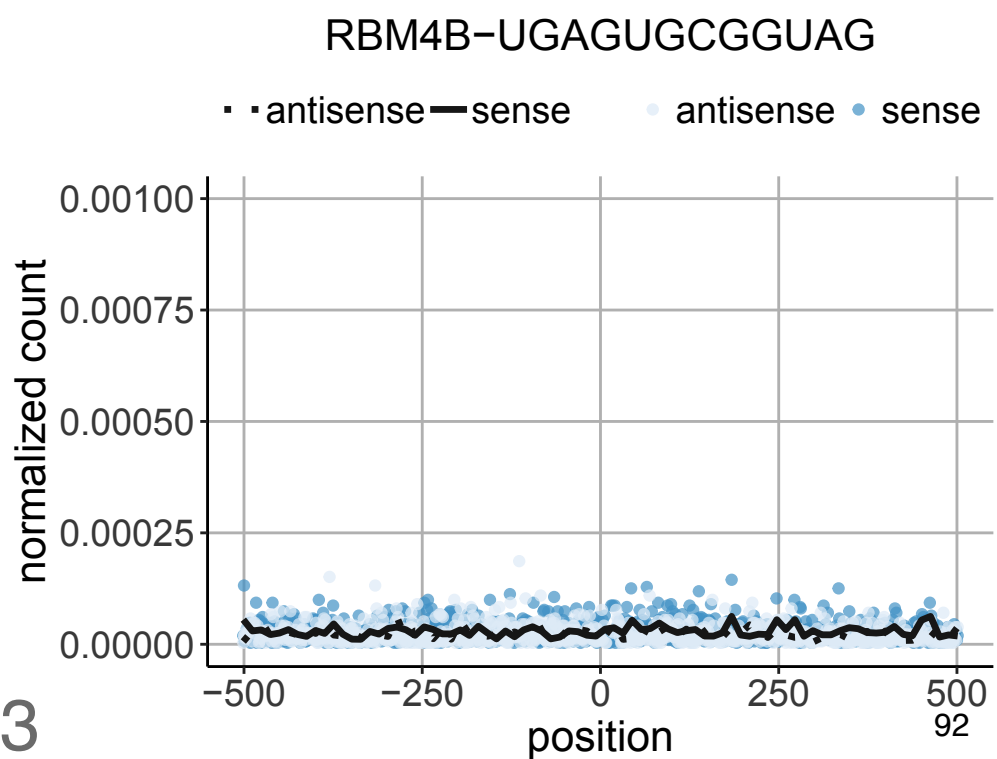

start codon

RBM6-YRCGCUCCUNGCY

• antisense — sense • antisense • sense

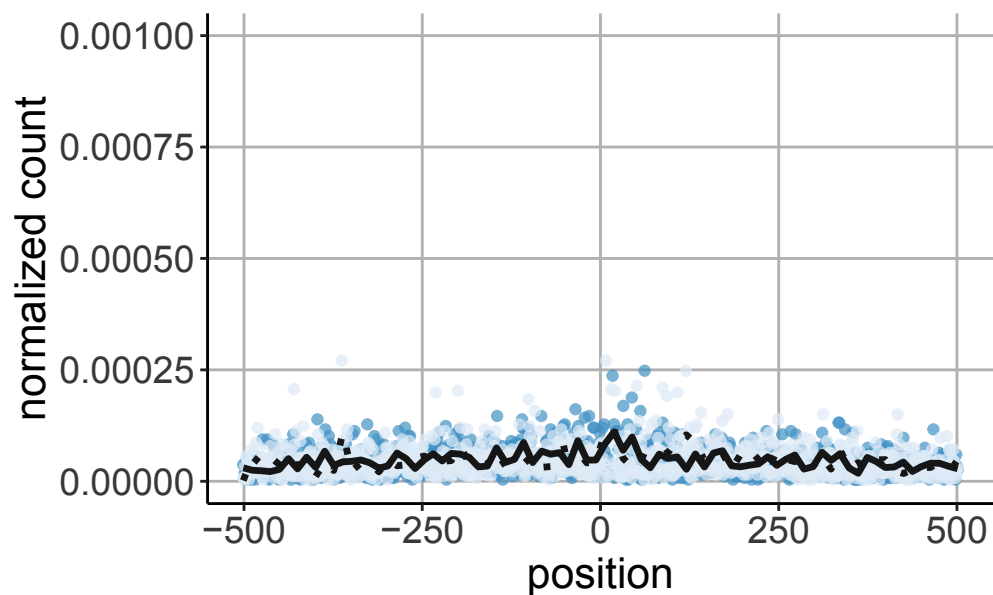

RBM6-YRYGCUCGUGGCYN

• antisense — sense • antisense • sense

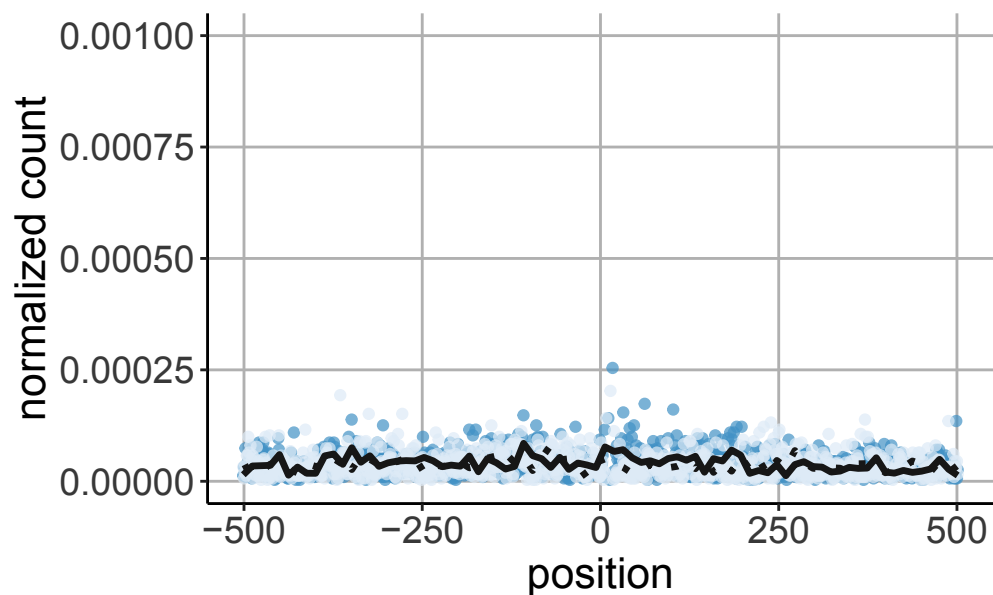

RBMS1-SGUGCAUAAKGCN

• antisense — sense • antisense • sense

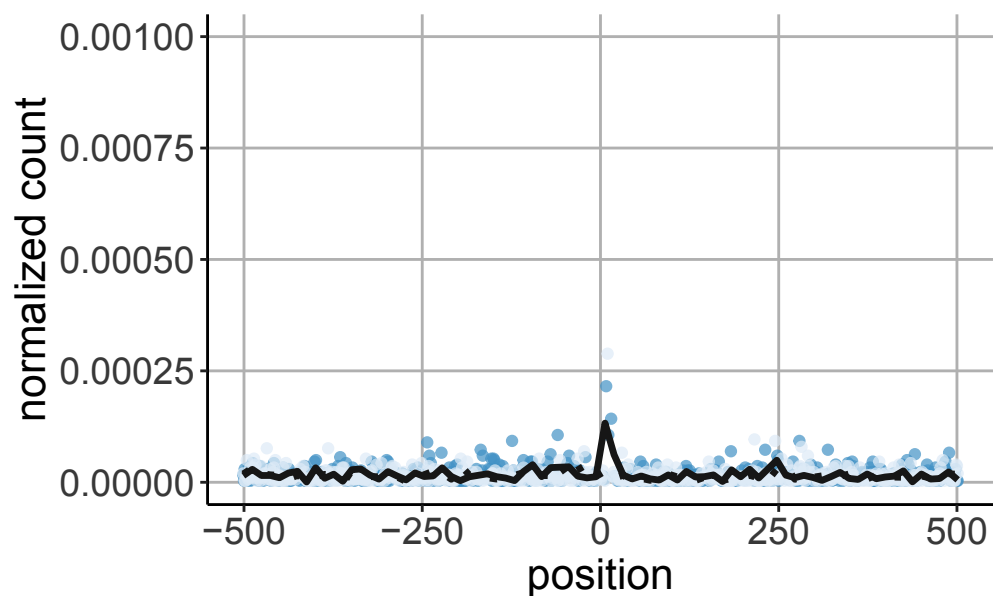

RBMS2-NUGCAUAAUGN

• antisense — sense • antisense • sense

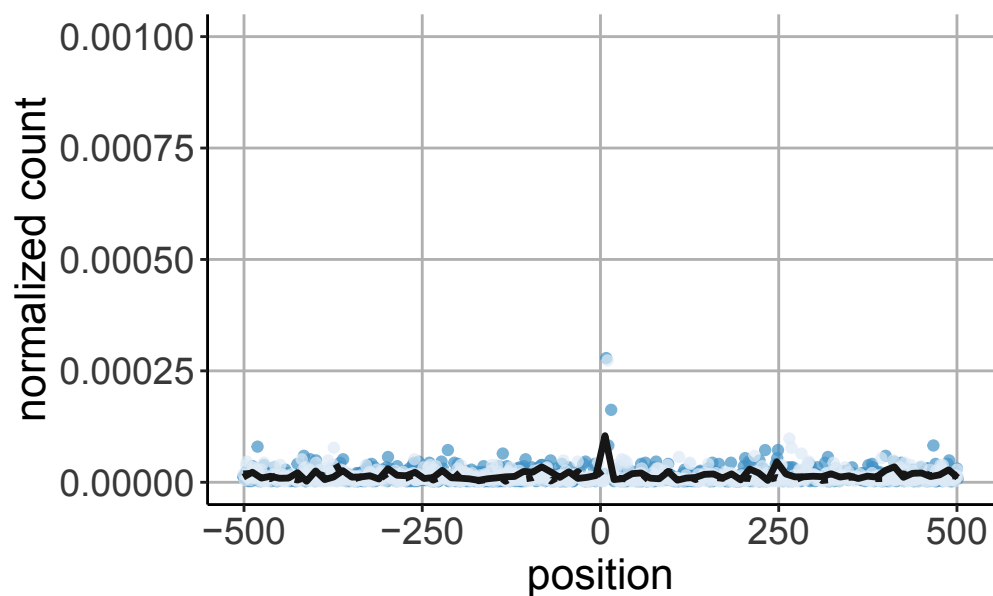

RBMS3-NUGCAUAAUGN

• antisense — sense • antisense • sense

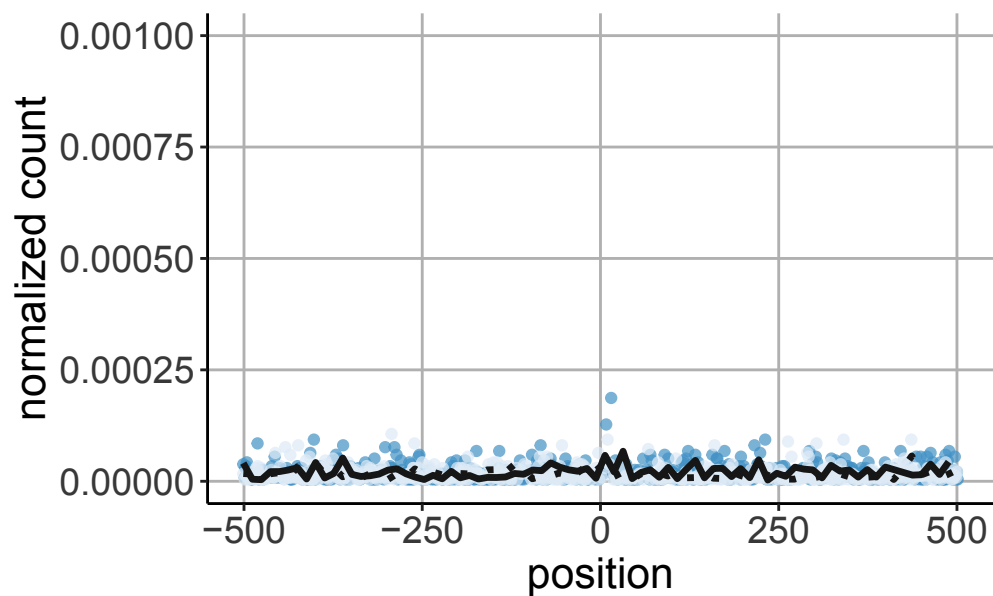

RBMS3-SAUGYAUAAKUG

• antisense — sense • antisense • sense

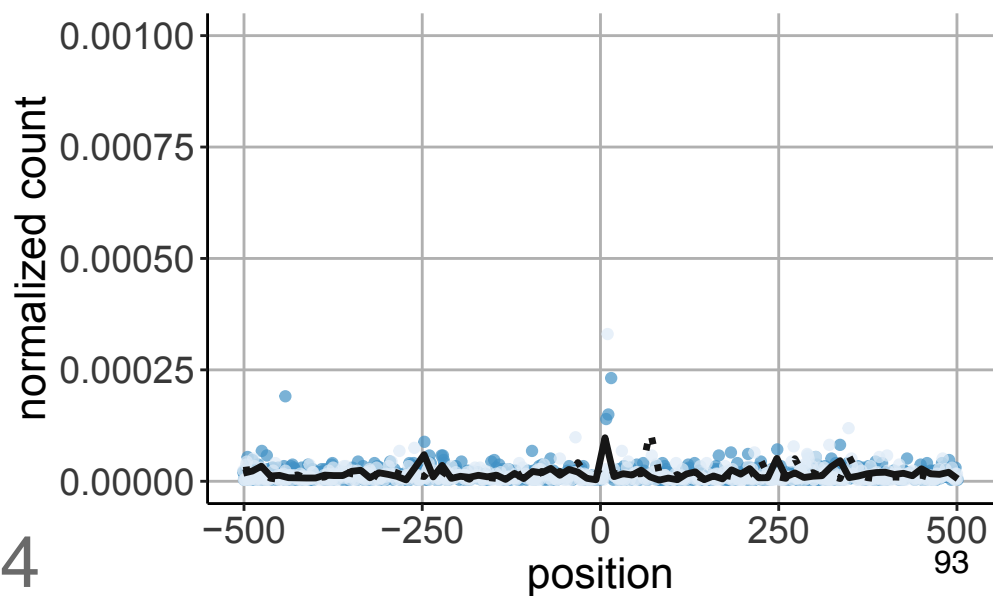

start codon

RBM1E-NGCUUCGNGCN

• antisense — sense • antisense • sense

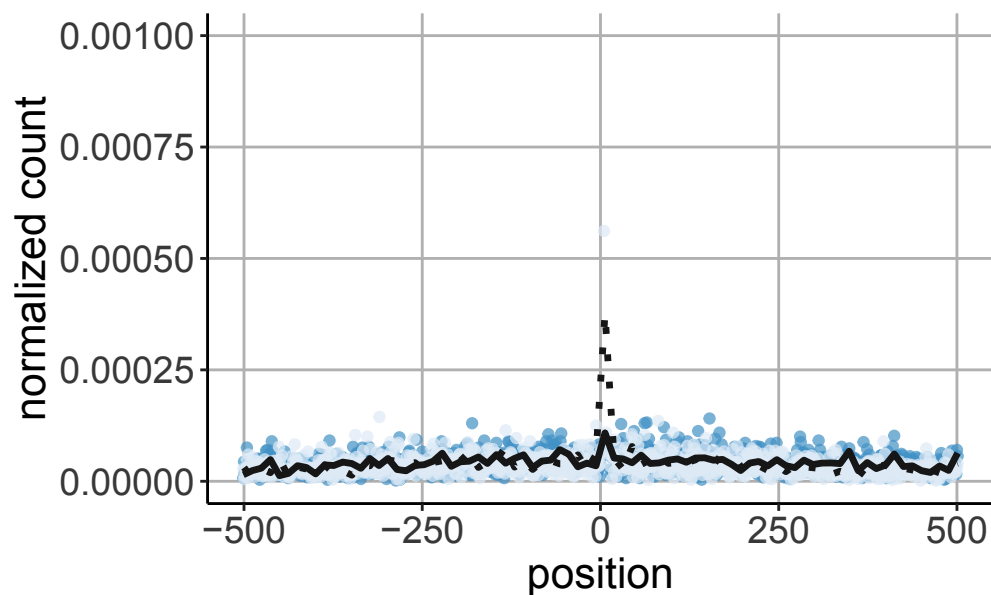

RBM1E-NAGCUUNGUGCUN

• antisense — sense • antisense • sense

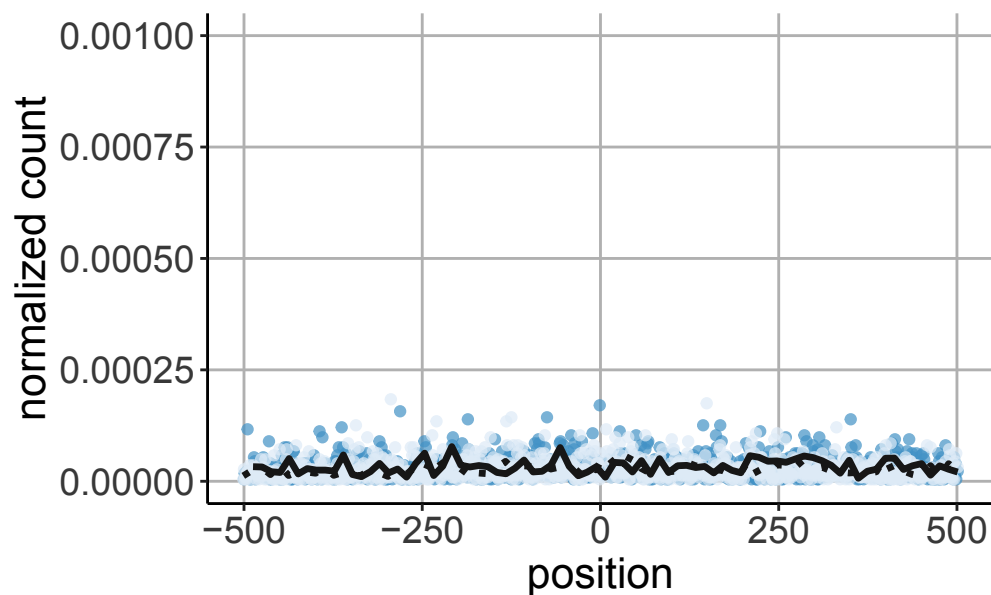

RBM1F-NGCCUCAAGGYN

• antisense — sense • antisense • sense

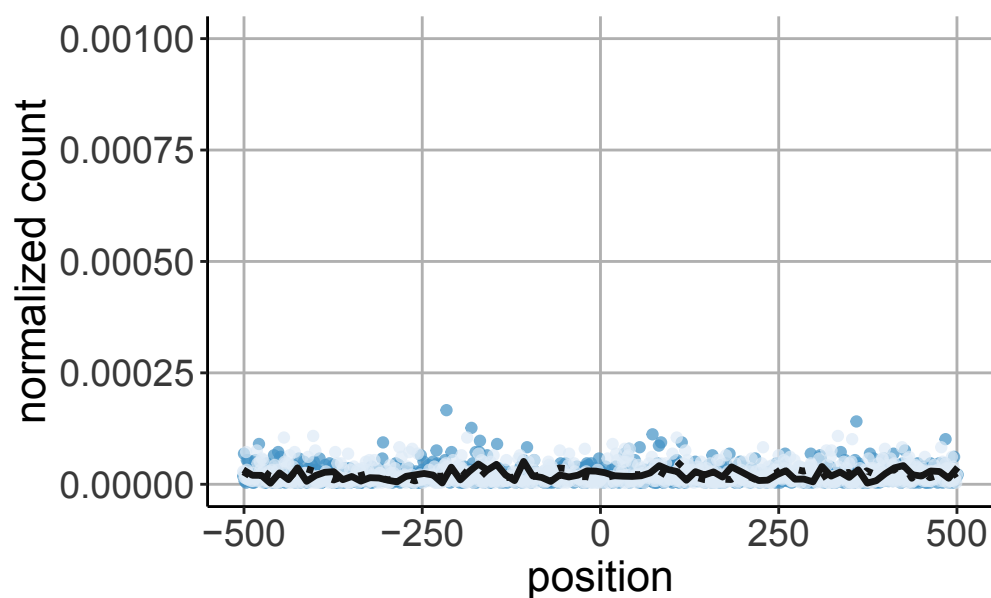

RBM1F-GCGCAAGAGC

• antisense — sense • antisense • sense

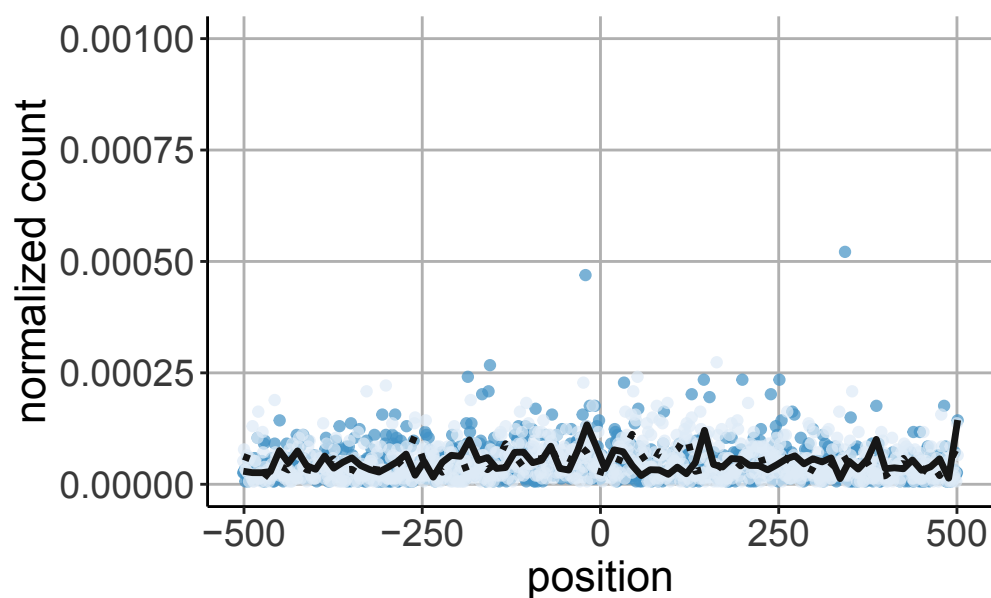

RBM1J-NGCCUCAAGGYN

• antisense — sense • antisense • sense

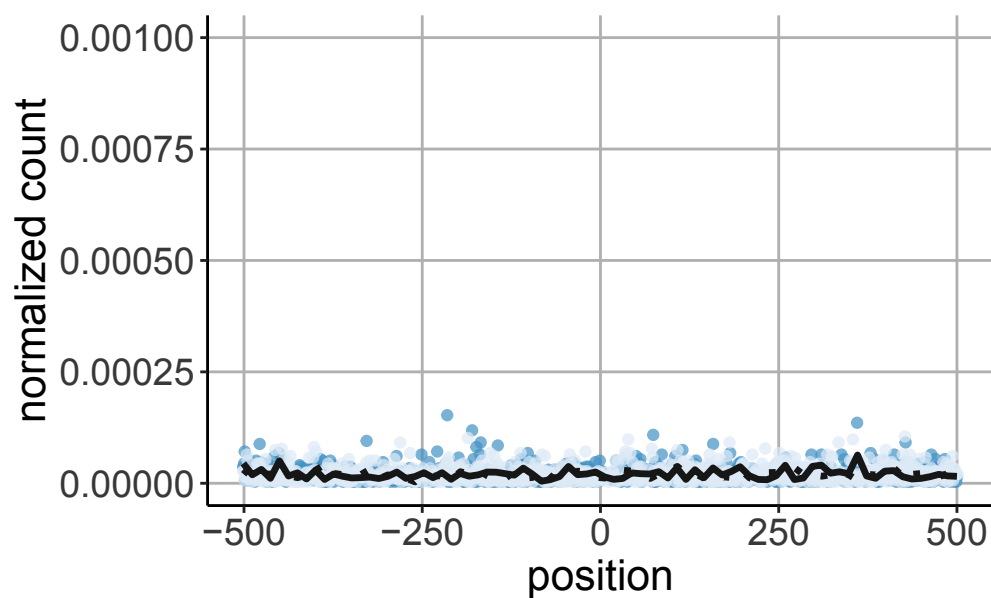

RBM1J-GCGCAAGAGC

• antisense — sense • antisense • sense

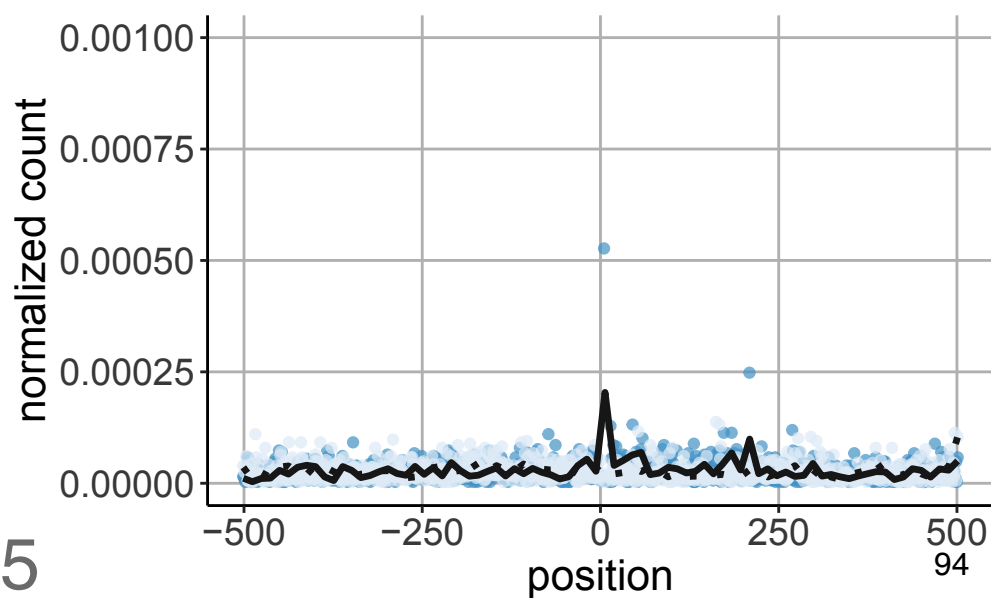

start codon

RBM1J-NGCGUCGUGGCN

• antisense — sense • antisense • sense

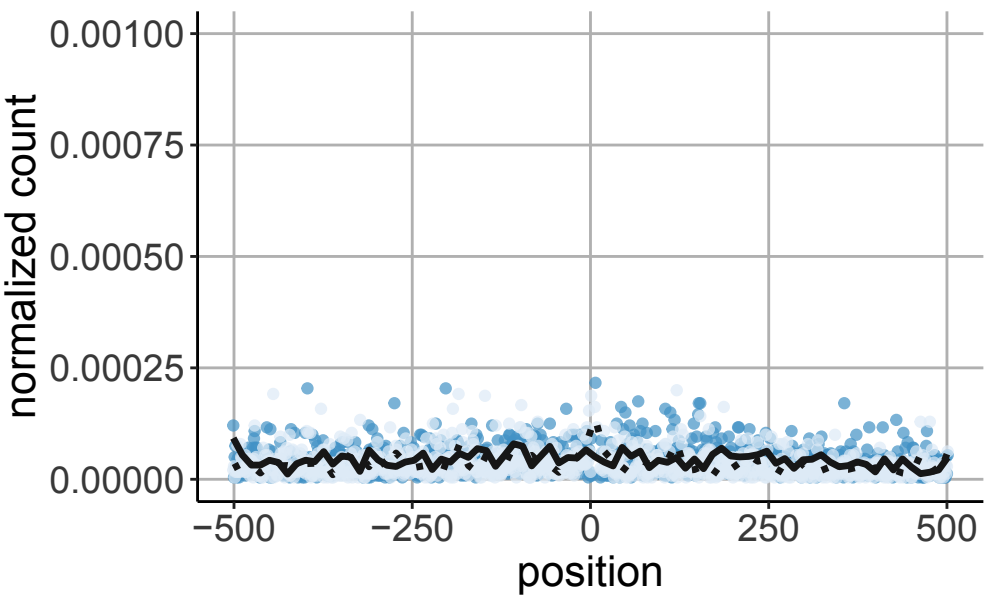

RBM1J-UGAAUUCGUCN

• antisense — sense • antisense • sense

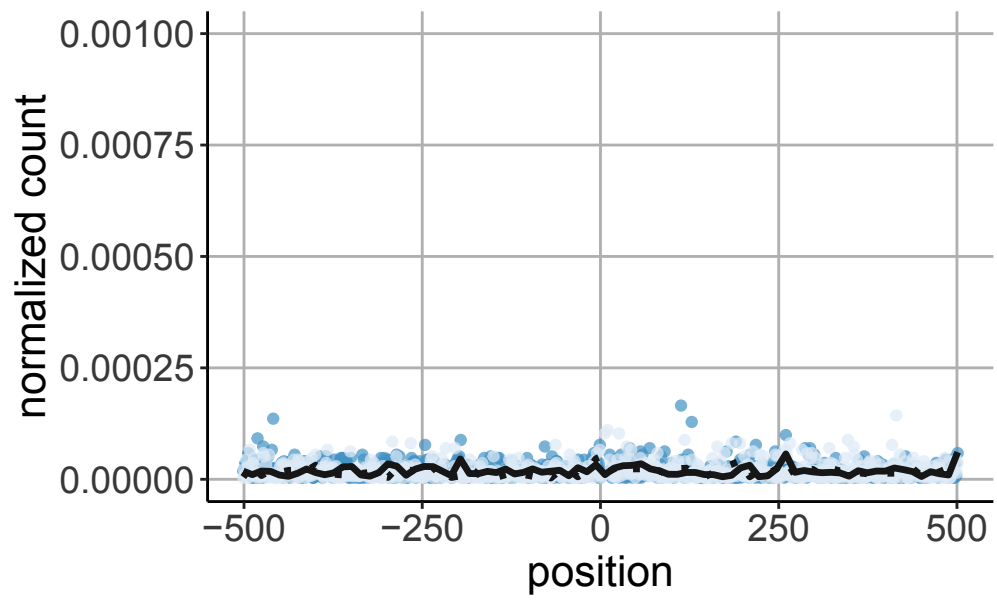

RC3H1\_2-YRCGUUUUAGKR

• antisense — sense • antisense • sense

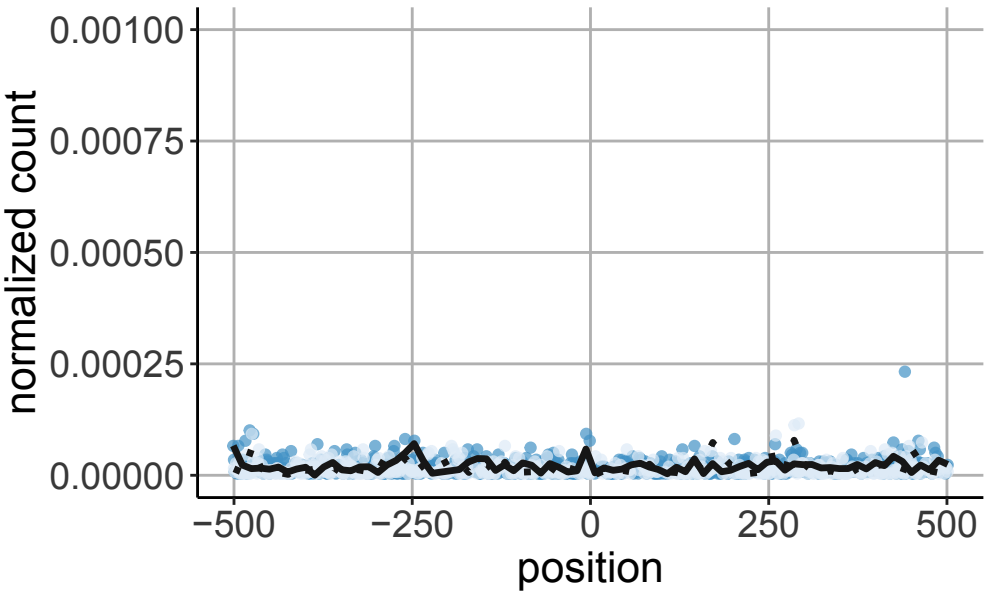

RC3H2-CURCGUUUUAGKAG

• antisense — sense • antisense • sense

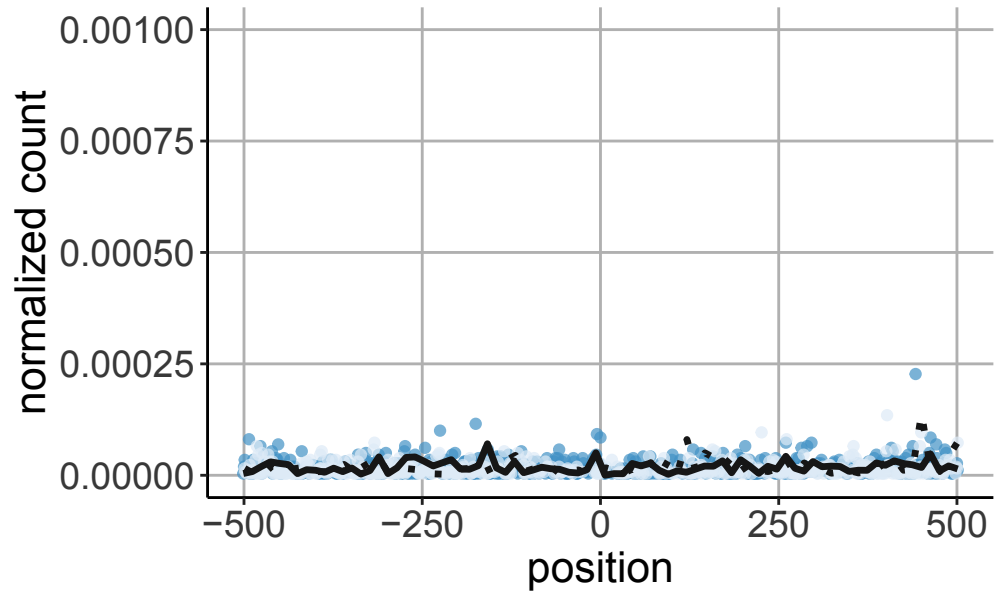

RC3H2-CUCGUAUCGAG

• antisense — sense • antisense • sense

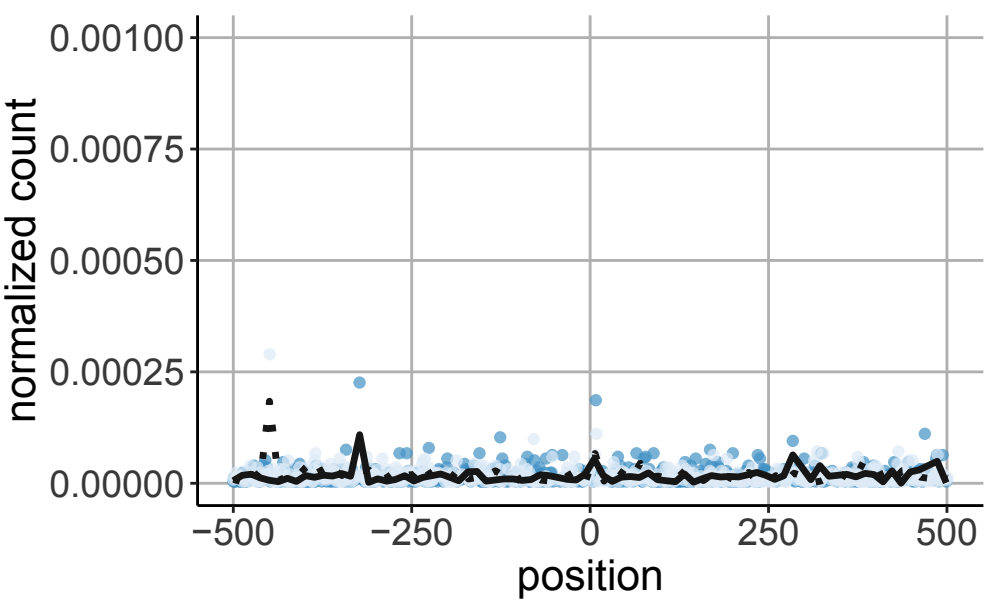

RC3H2-CCUCUNUGAGG

• antisense — sense • antisense • sense

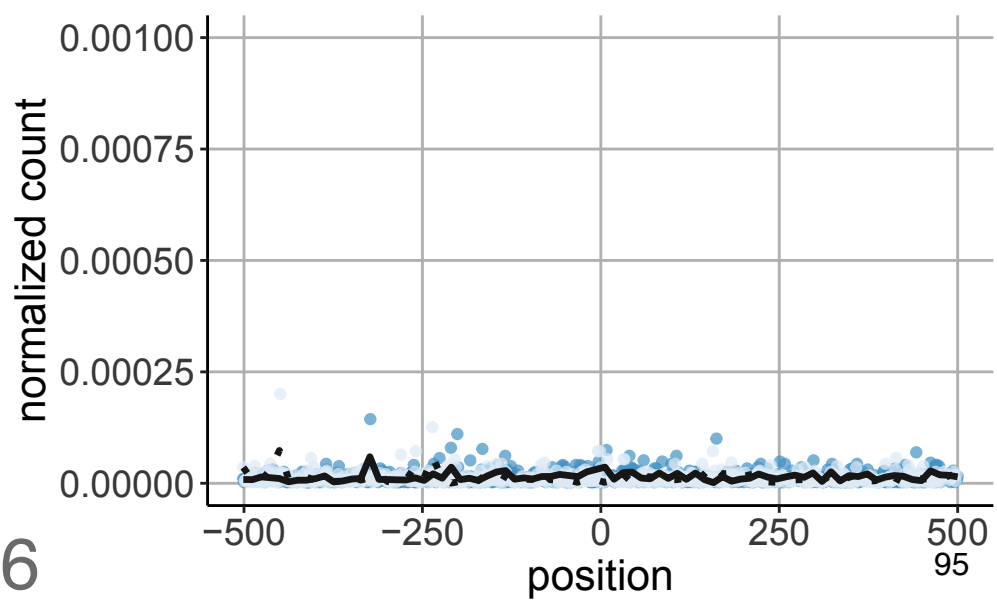



start codon

RNPC3-GCAGUKUUAGGGY

▪ antisense — sense    • antisense • sense

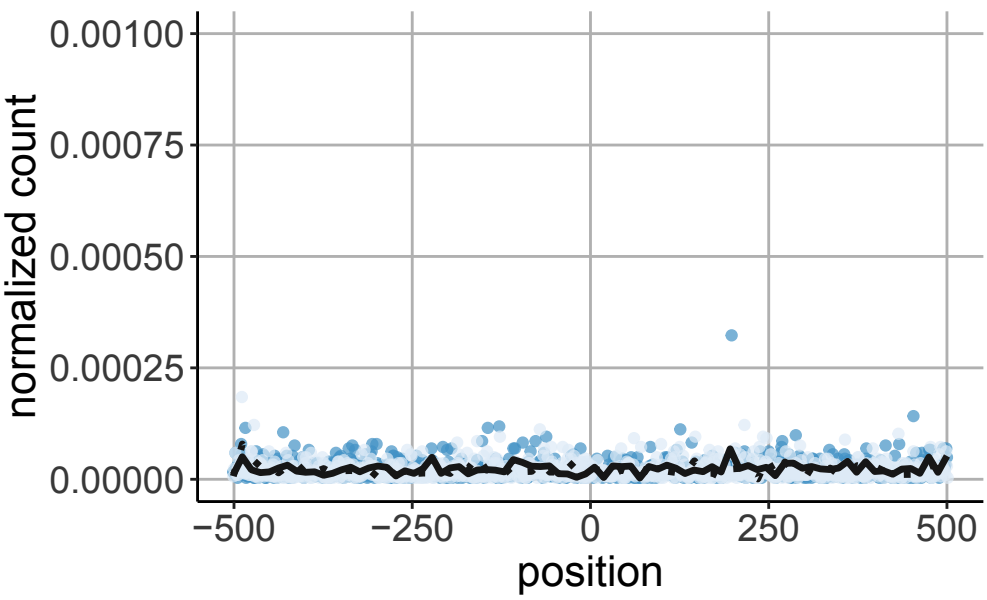

YBX1-RCCAYRHCAUCGY

▪ antisense — sense    • antisense • sense

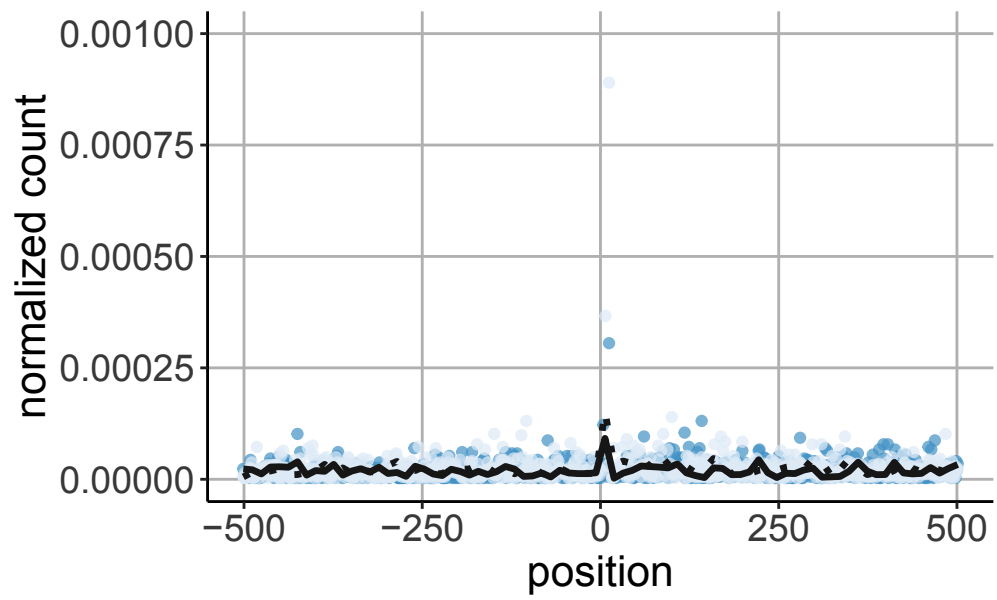

ZC3H12A-NGCAGGUAAGUGCN

▪ antisense — sense    • antisense • sense

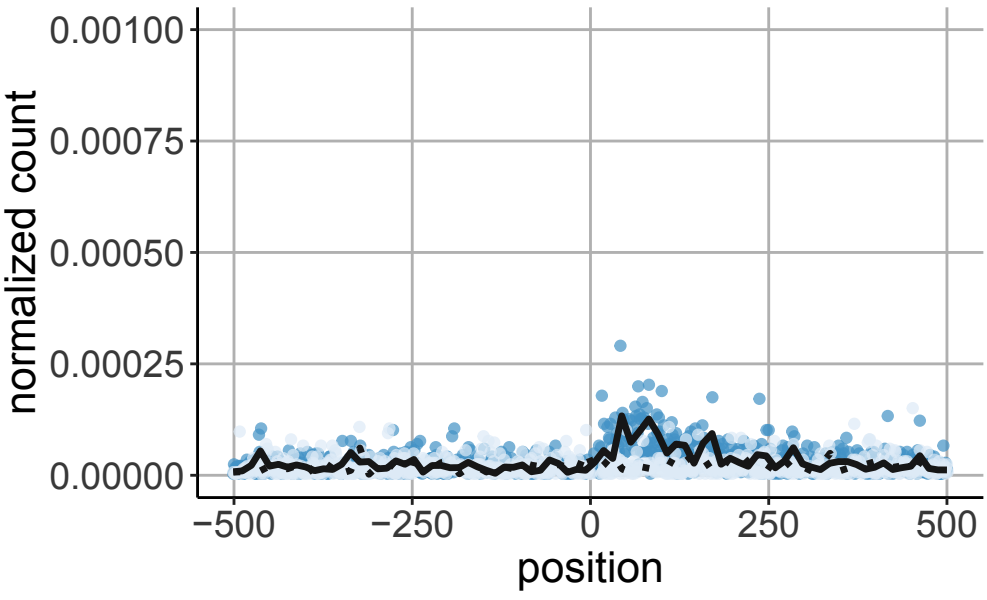

ZC3H12B-NGCAGGUAAGUGSN

▪ antisense — sense    • antisense • sense

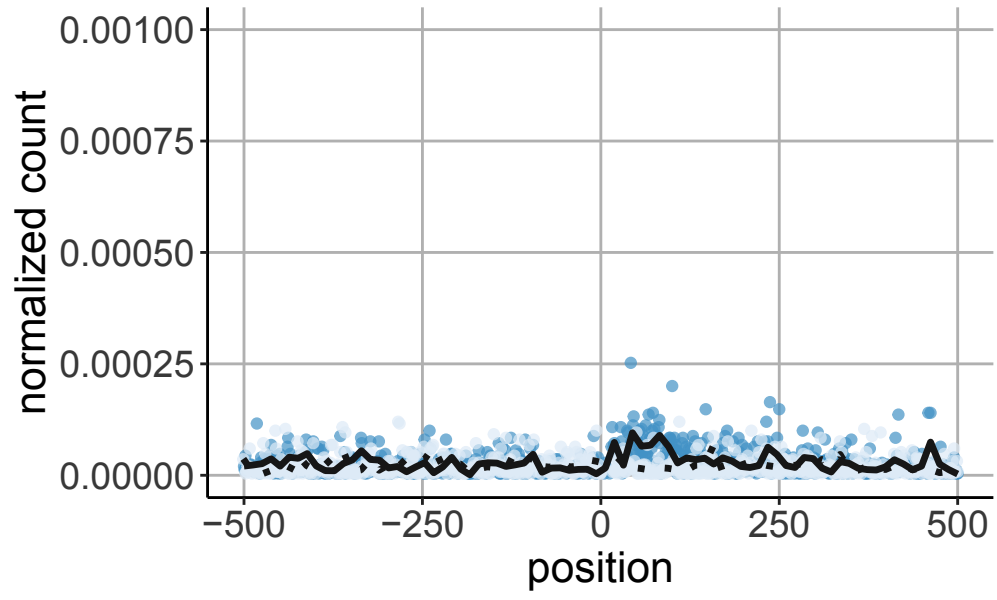

ZC3H12B-SCAGGUAUUAUGS

▪ antisense — sense    • antisense • sense

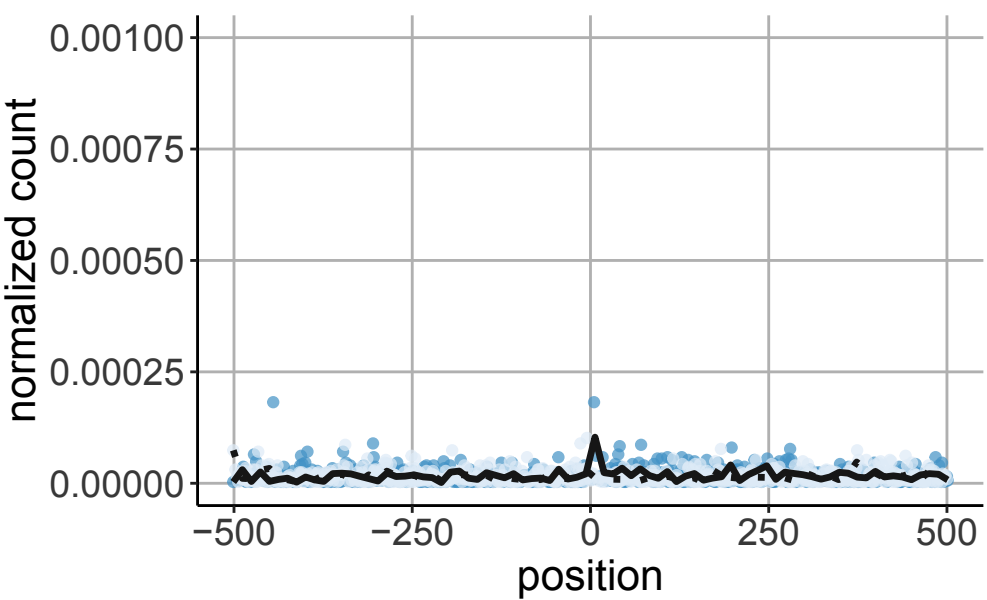

stop codon

ZC3H8-GCUUGC

▪ antisense — sense    • antisense • sense

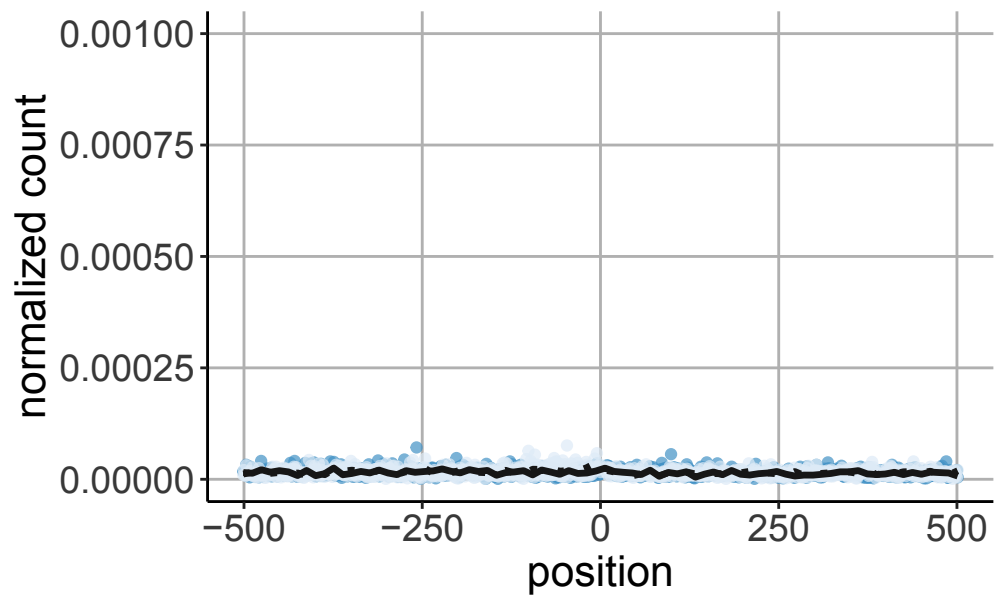

ESRP1\_3-GGUGUUGGUG

▪ antisense — sense    • antisense • sense

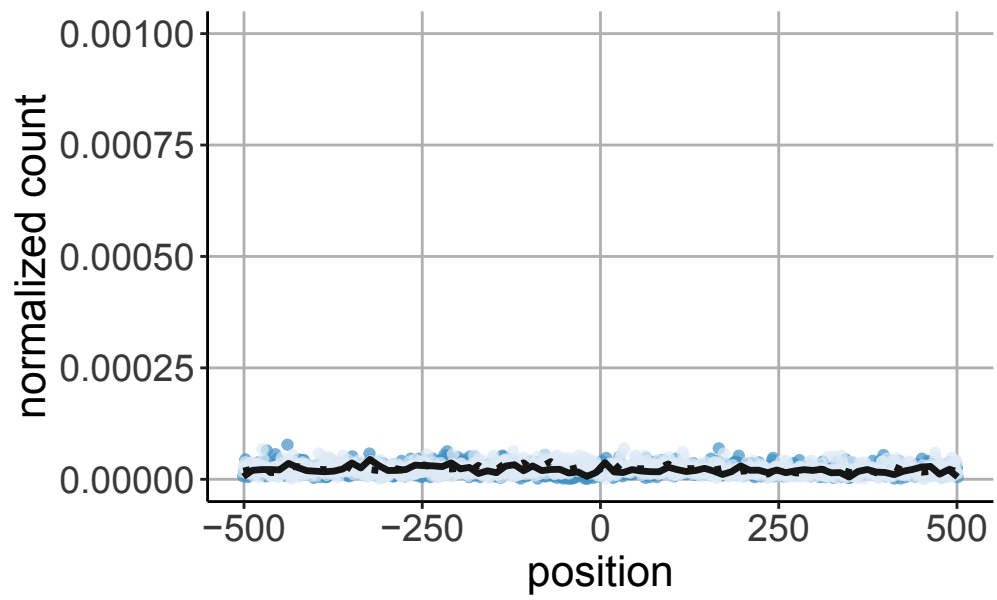

ELAVL3-GUUUUUG

▪ antisense — sense    • antisense • sense

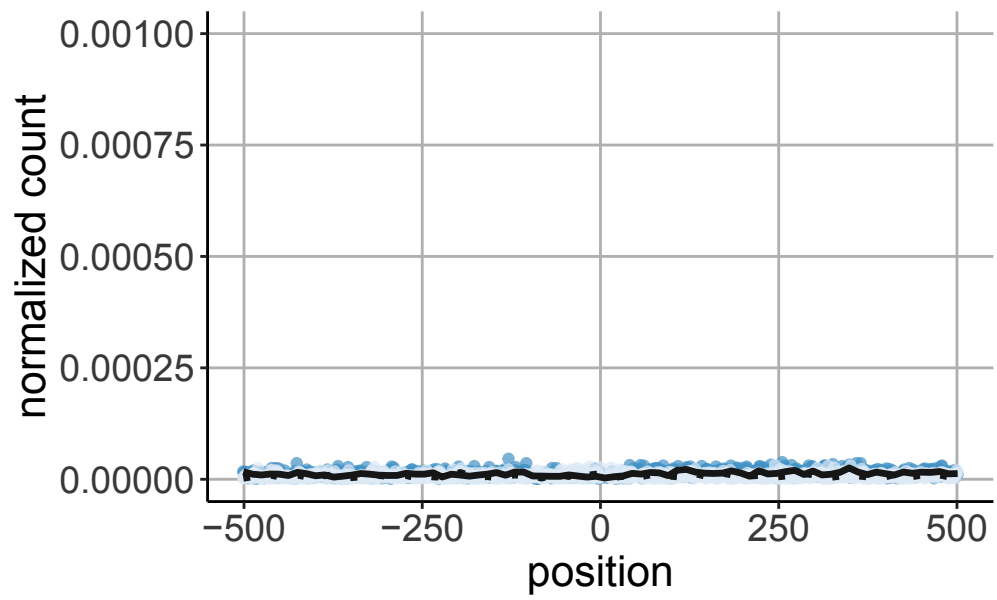

PUM1-NUGUAAAUAG

▪ antisense — sense    • antisense • sense

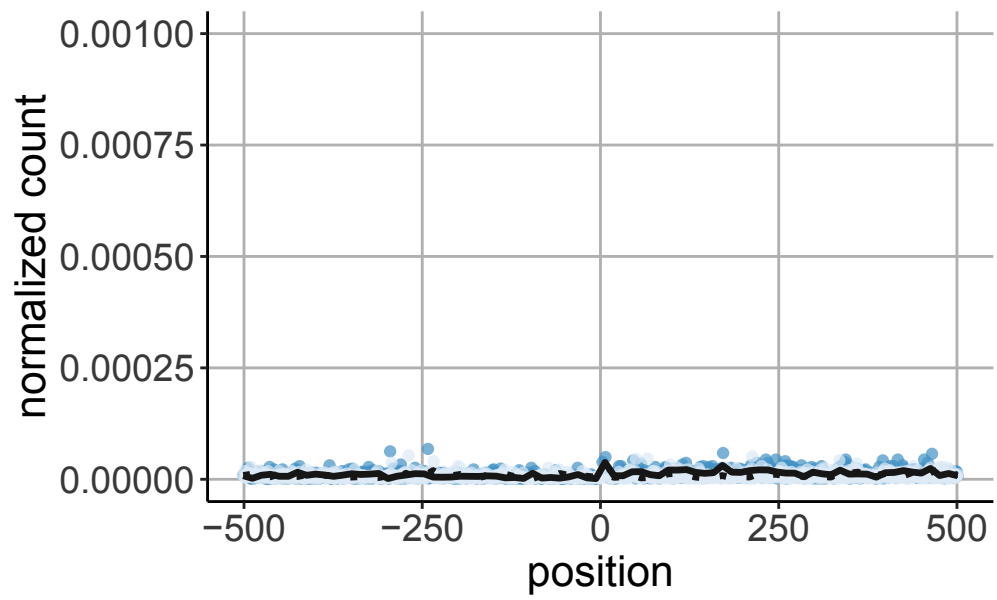

QKI-NUACUAACAWN

▪ antisense — sense    • antisense • sense

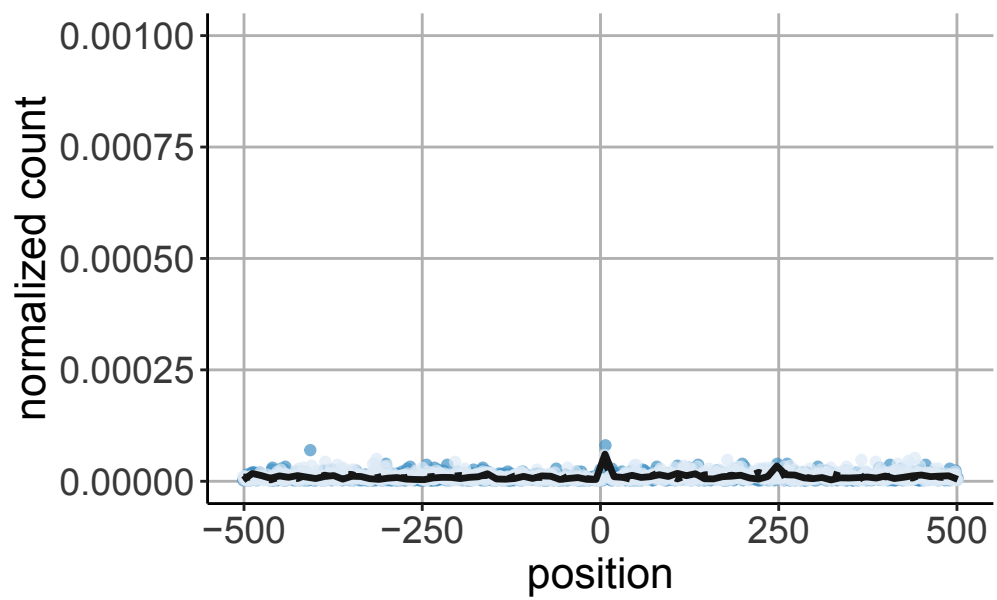

MCM3AP-CGCCAGUGCG

▪ antisense — sense    • antisense • sense

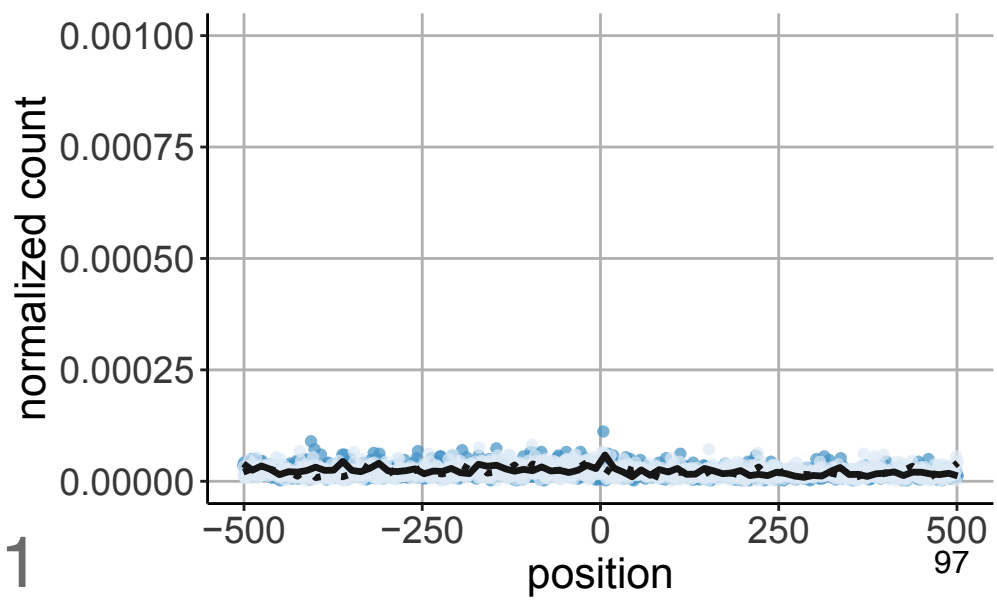

1

97

stop codon

HNRNPC-UUUUUGGUGG

▪ antisense — sense    • antisense • sense

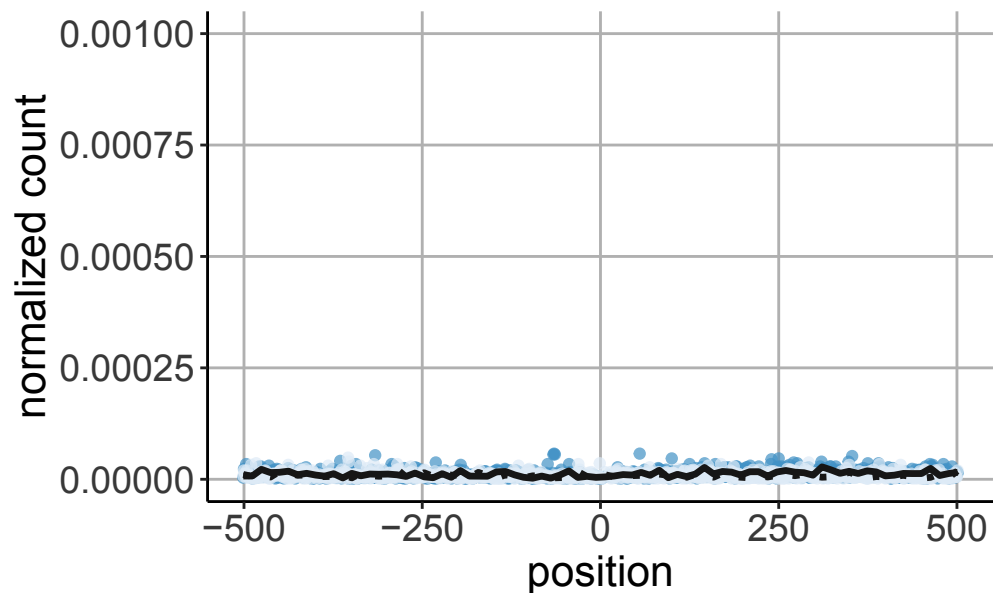

PABPC5-NUAKAAAKUURCN

▪ antisense — sense    • antisense • sense

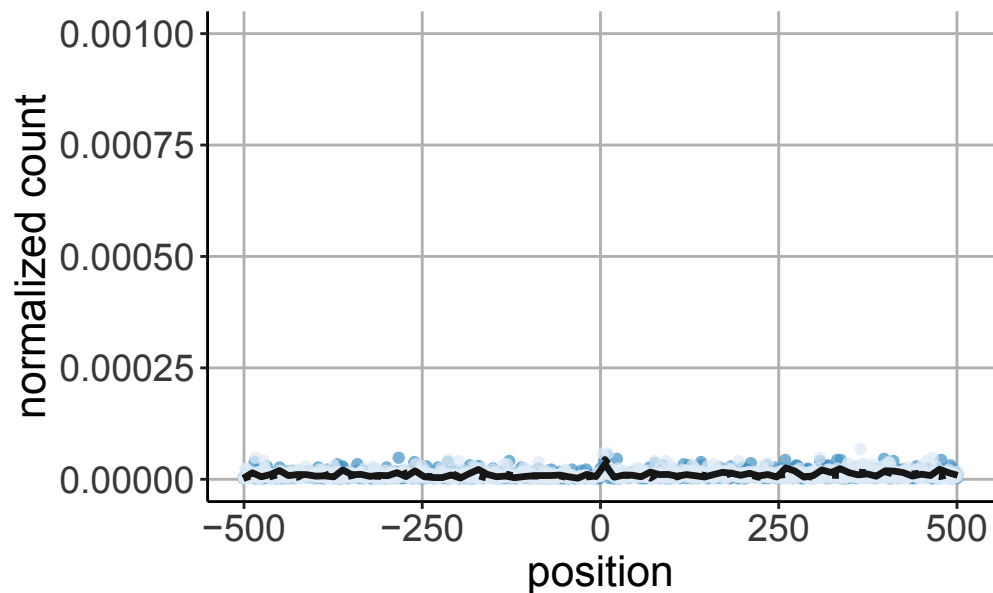

PABPC5-NUAKAAAUUACUACAN

▪ antisense — sense    • antisense • sense

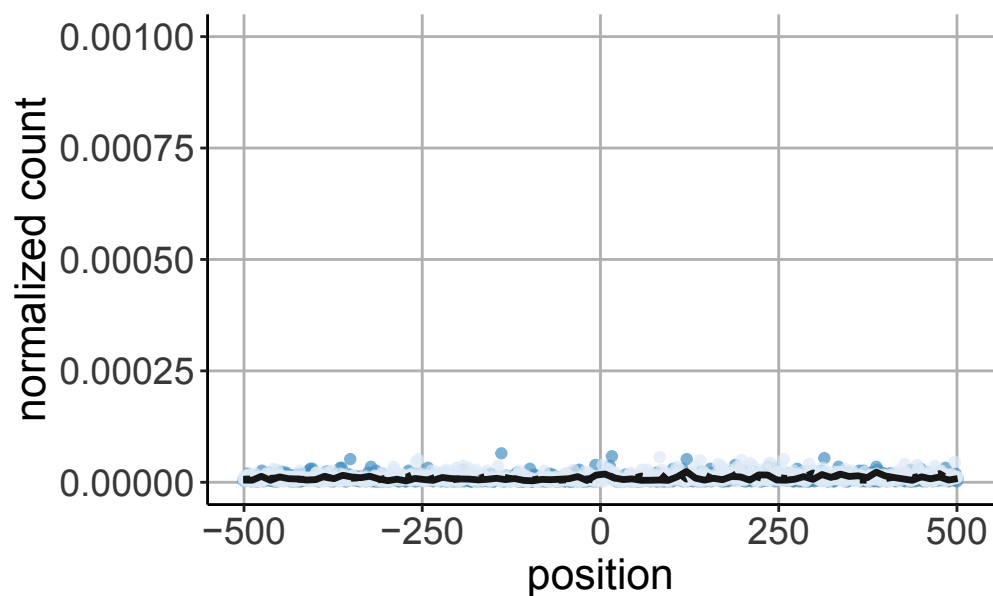

LARP7\_4-GRUCGUGAUGN

▪ antisense — sense    • antisense • sense

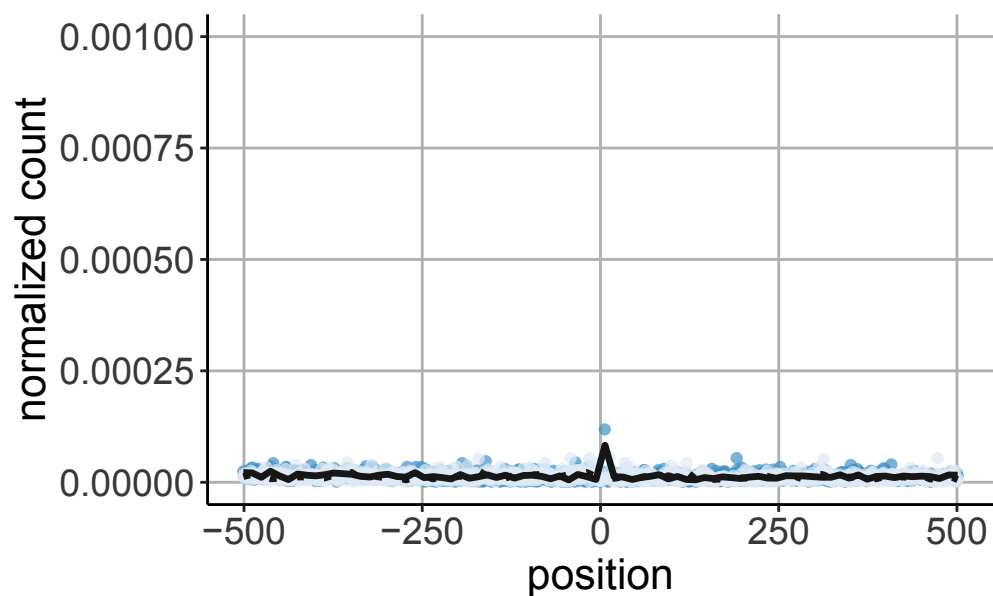

ZCRB1-GUAUUAAGGG

▪ antisense — sense    • antisense • sense

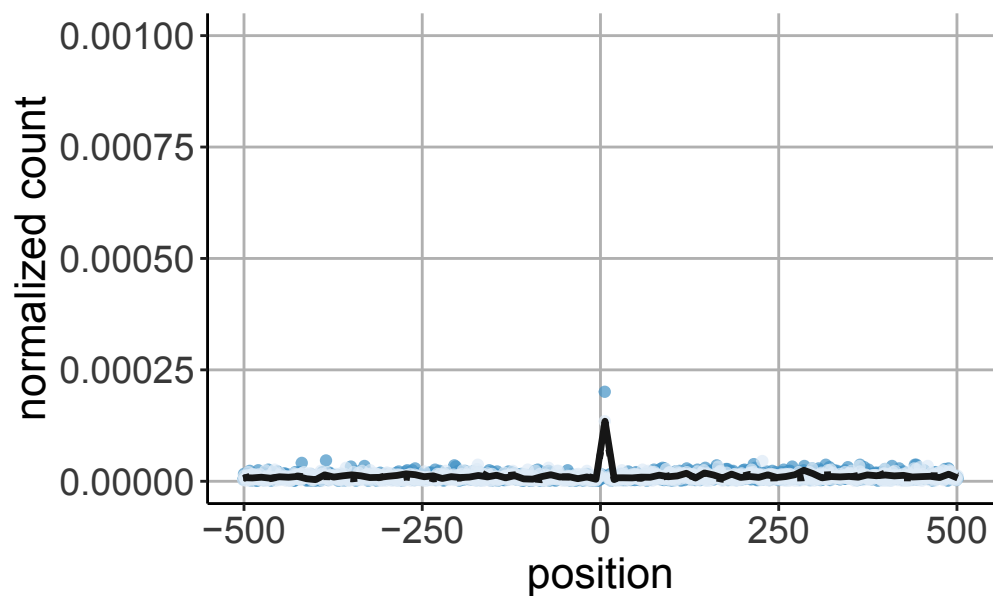

ZCRB1-GUGGACUUAANN

▪ antisense — sense    • antisense • sense

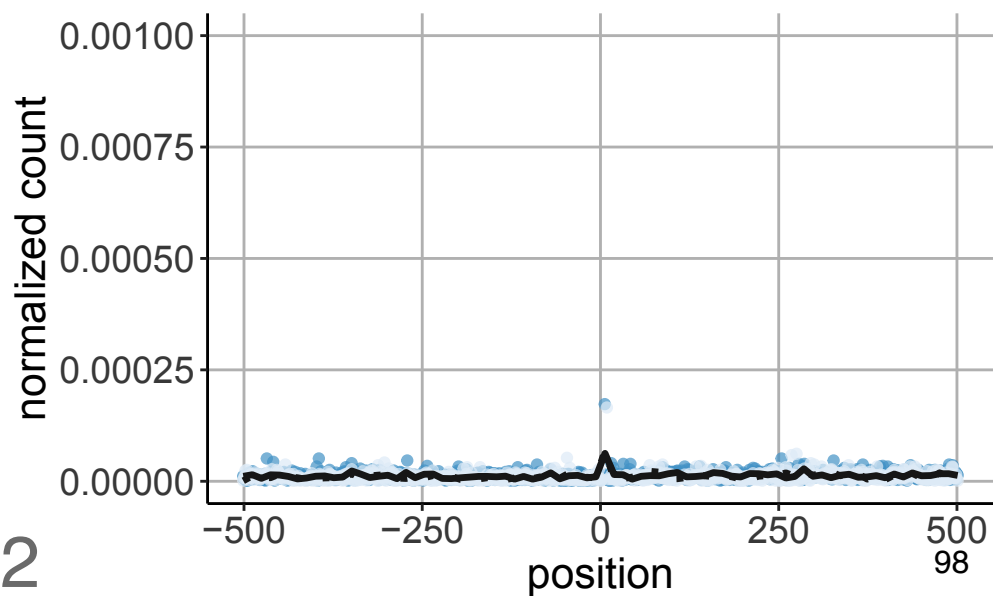

stop codon

RBM42-NGGAACUAAN

▪ antisense — sense    • antisense • sense

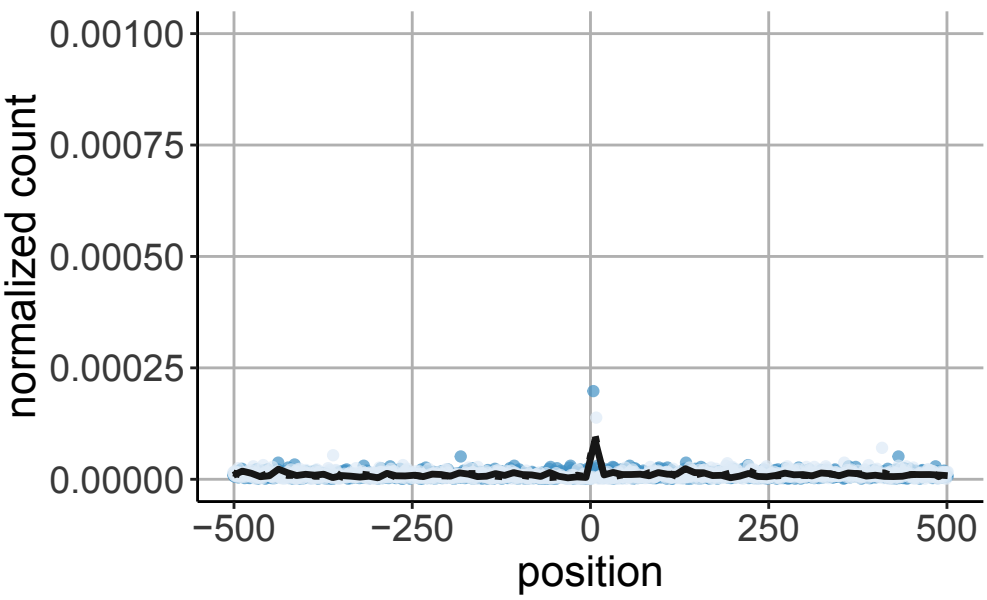

KHDRBS1-UAAUAGN

▪ antisense — sense    • antisense • sense

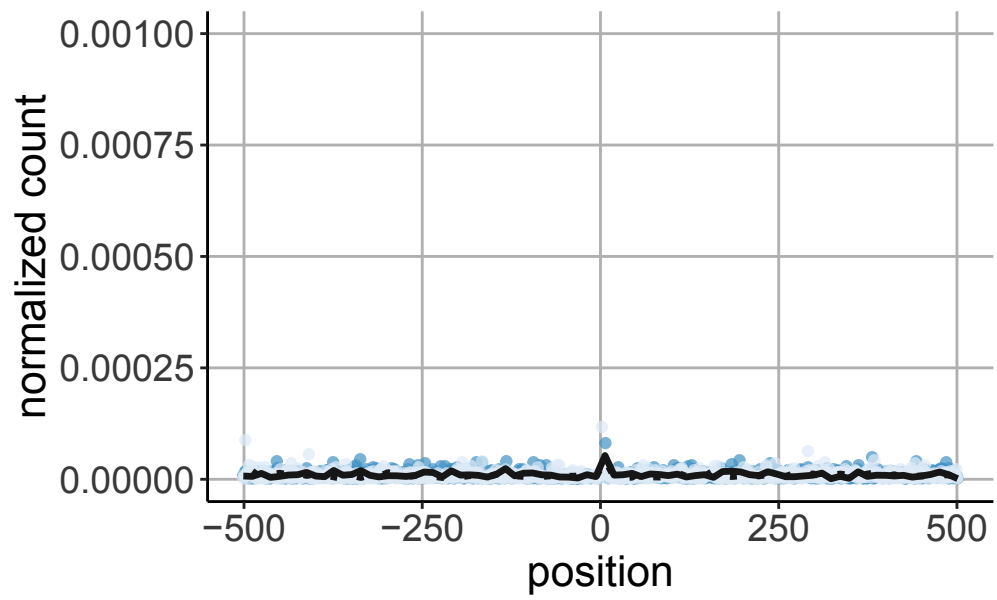

HNRNPCL1-GUUUUUUGGG

▪ antisense — sense    • antisense • sense

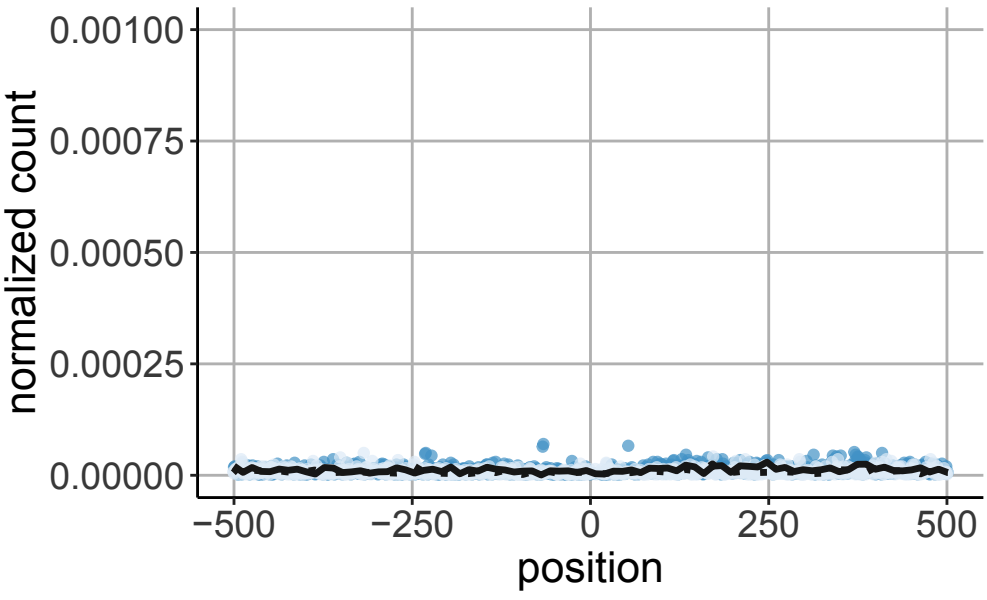

ZFR\_4-GUGACGGAUG

▪ antisense — sense    • antisense • sense

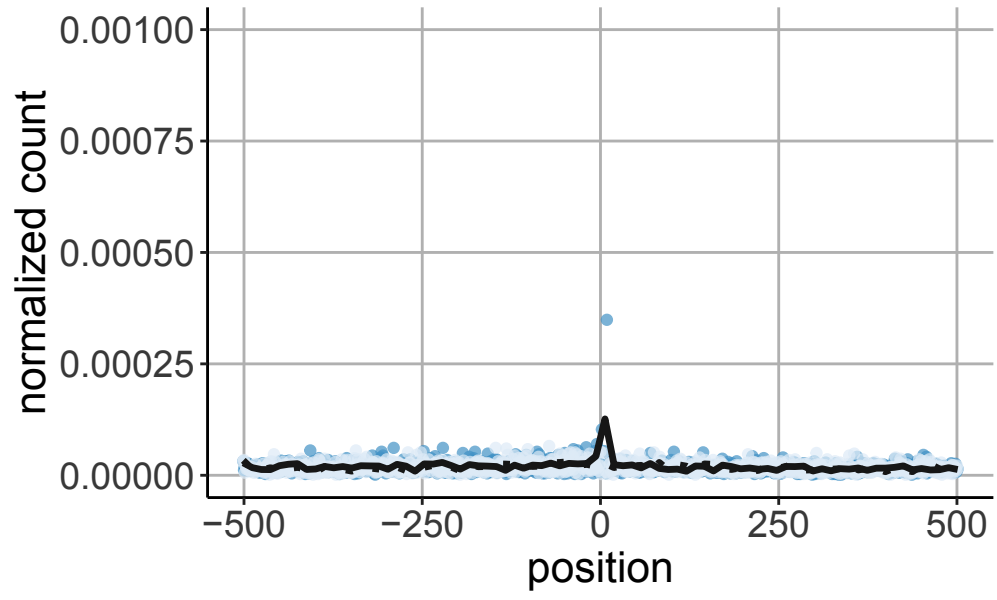

ZFR\_4-GUGC GGAUGN

▪ antisense — sense    • antisense • sense

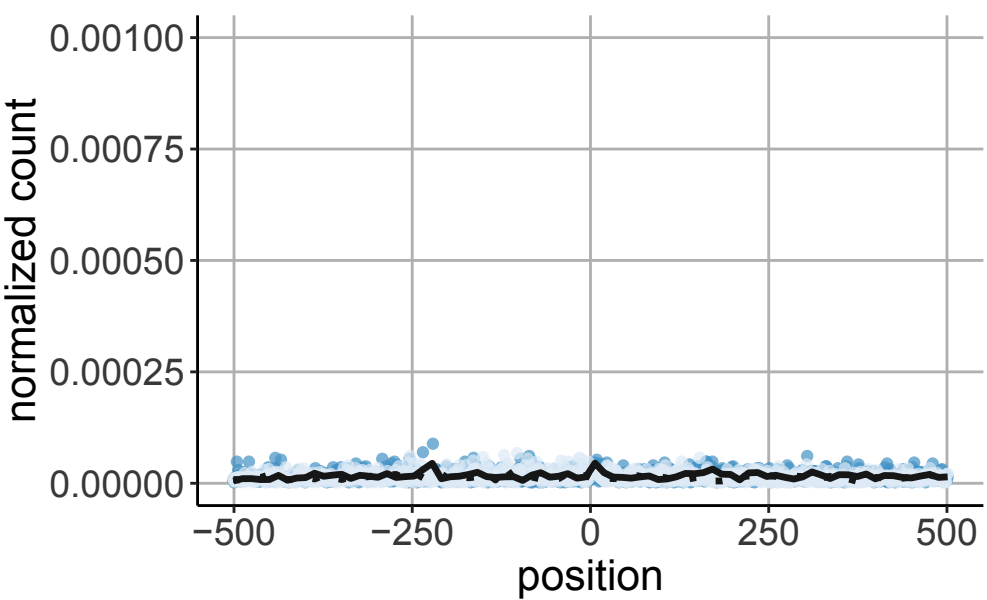

HNRPLL-GCAURCAYCC

▪ antisense — sense    • antisense • sense

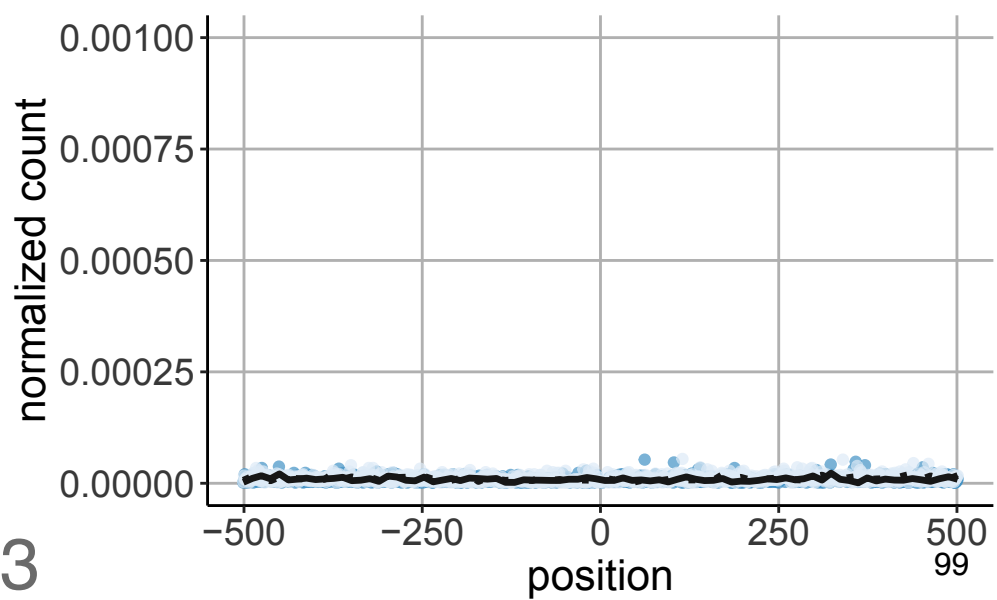

stop codon ZC3H12C-NUGCGNCAGUCGGUAGC

• antisense — sense • antisense • sense

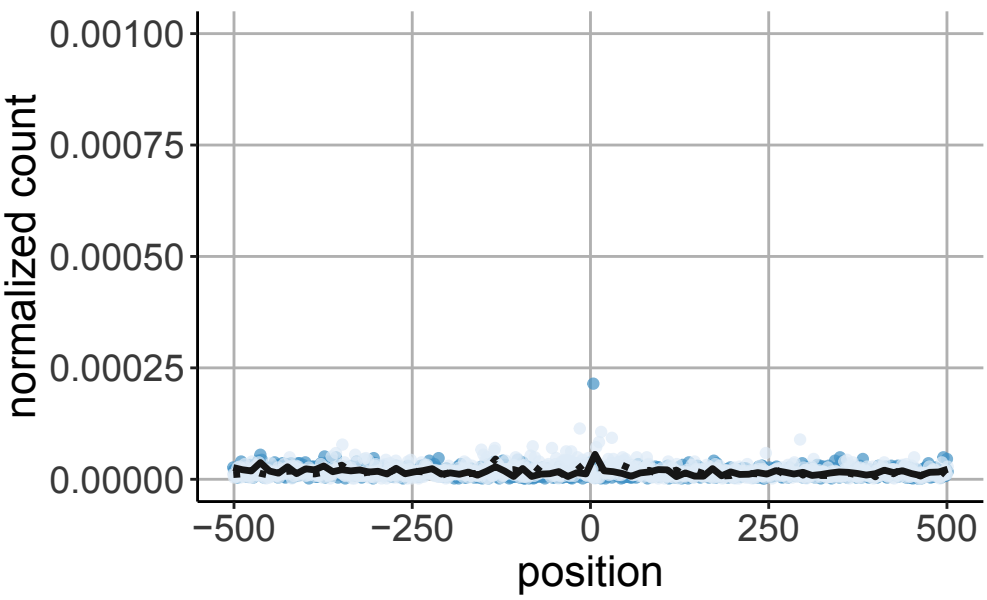

HNRNPL\_2-ACAUWWCAUW

• antisense — sense • antisense • sense

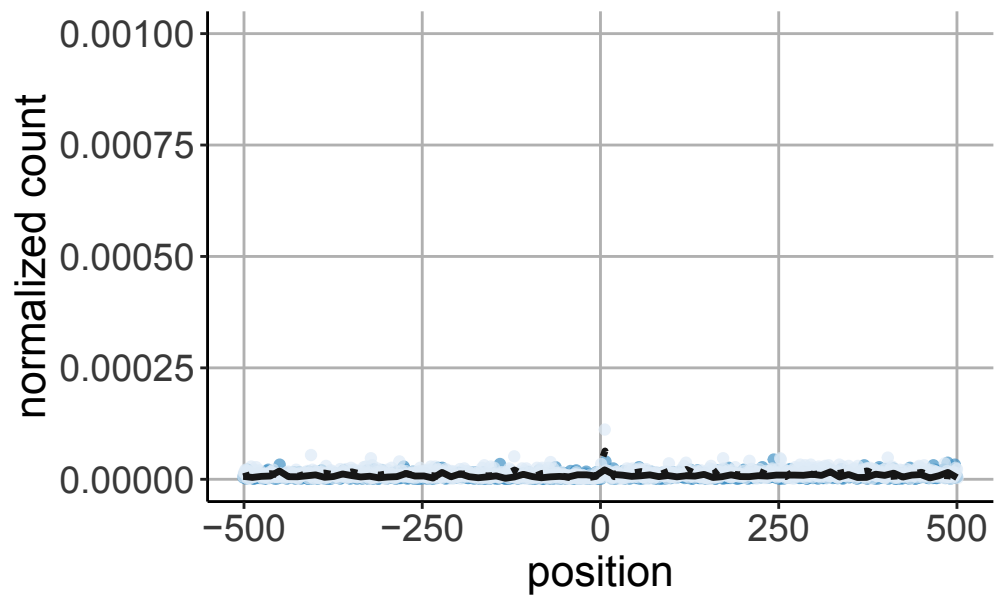

RBMS2-CAGUGAUUGG

• antisense — sense • antisense • sense

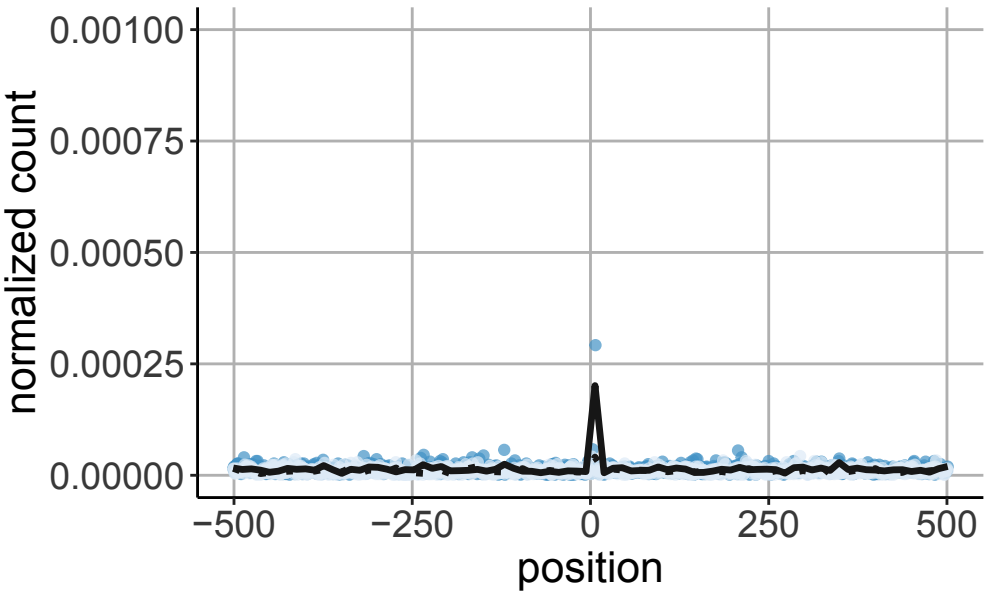

RBM14-GGKUGCGUCG

• antisense — sense • antisense • sense

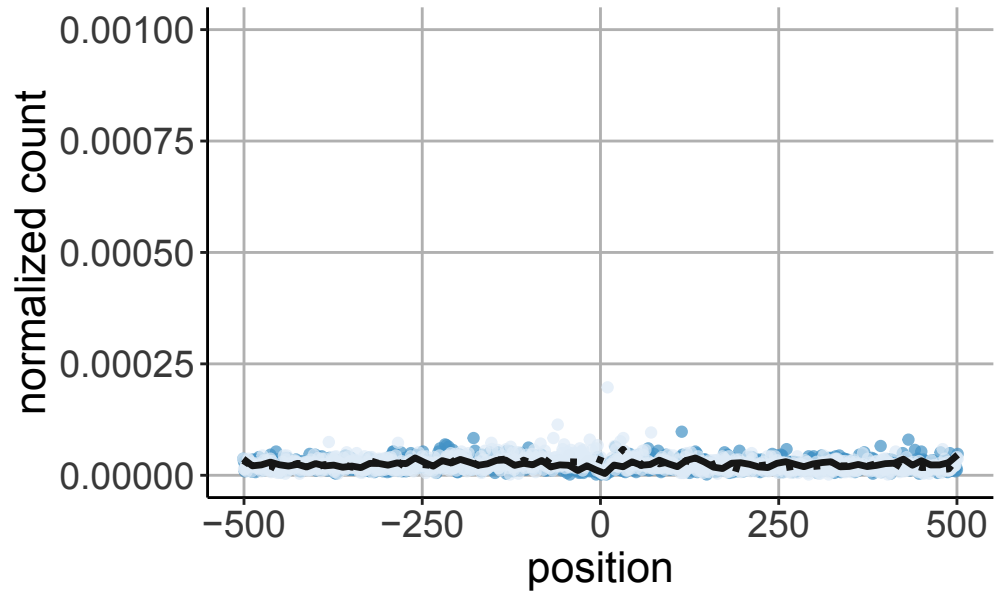

RBMS2-CGNUAUAUAG

• antisense — sense • antisense • sense

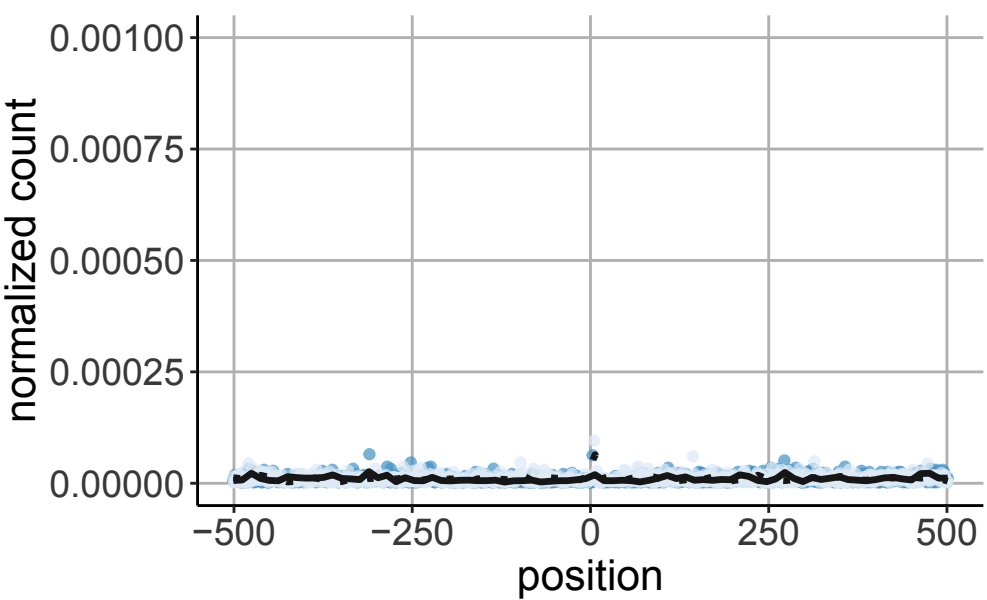

RBMS1-GUAUUUAKNGGG

• antisense — sense • antisense • sense

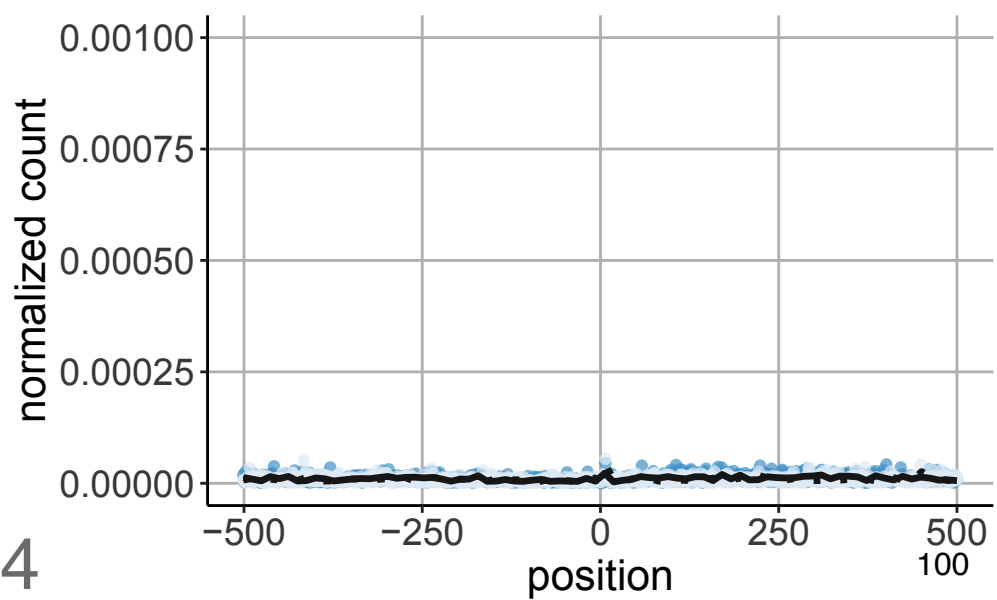

stop codon

RBMS1-UUAUAAUCAAC

▪ antisense — sense    • antisense • sense

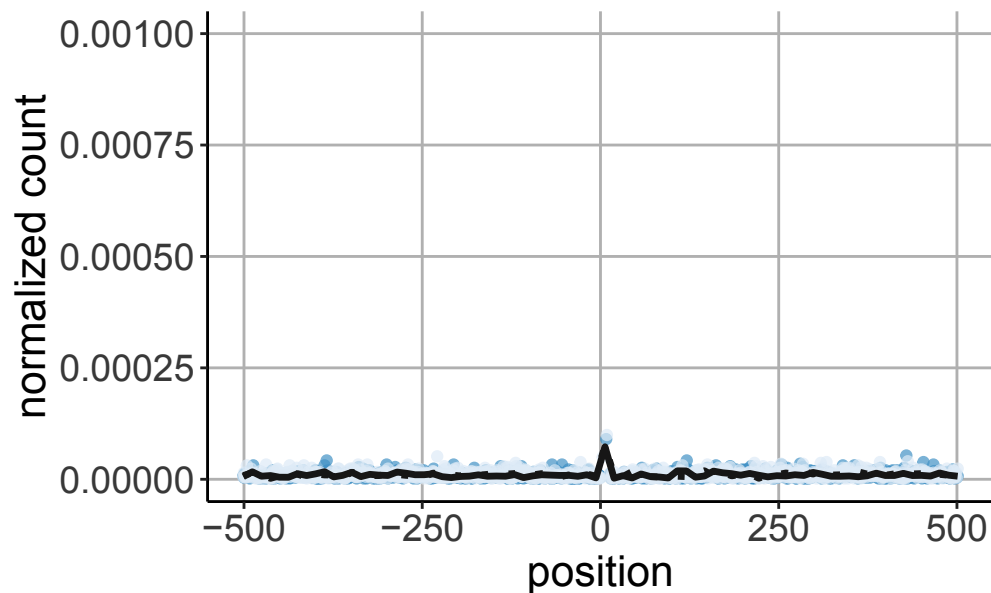

NOVA2\_3-UCAUUCAU

▪ antisense — sense    • antisense • sense

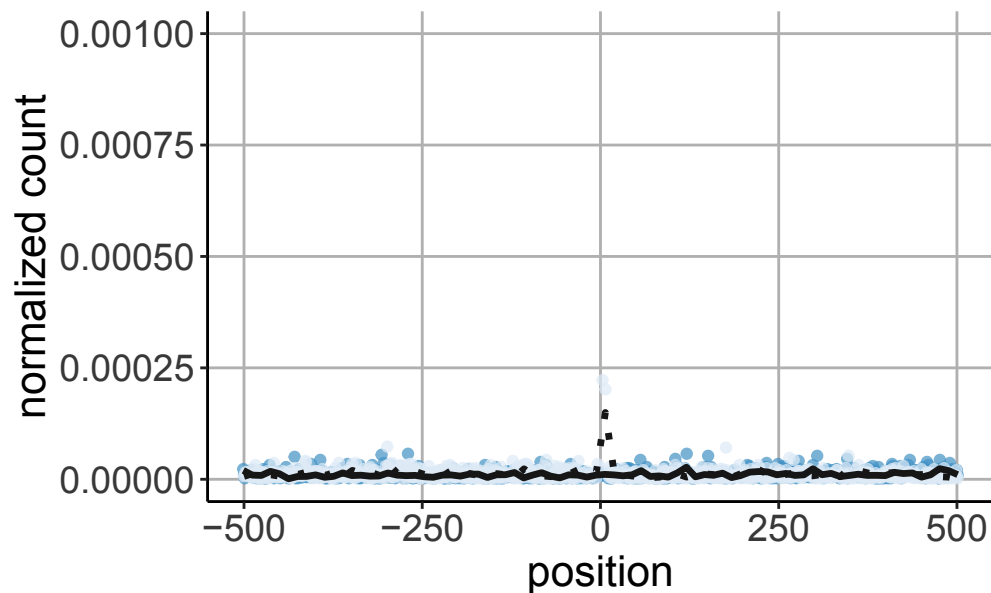

ZFP36-KUAUUUAUGGUGG

▪ antisense — sense    • antisense • sense

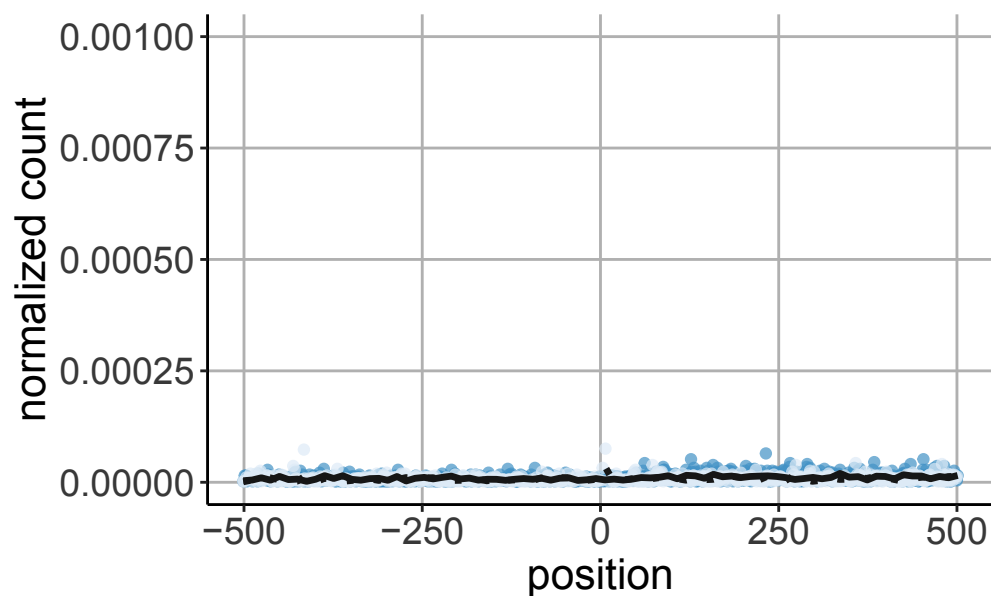

ZFP36-UUAUUUAUU

▪ antisense — sense    • antisense • sense

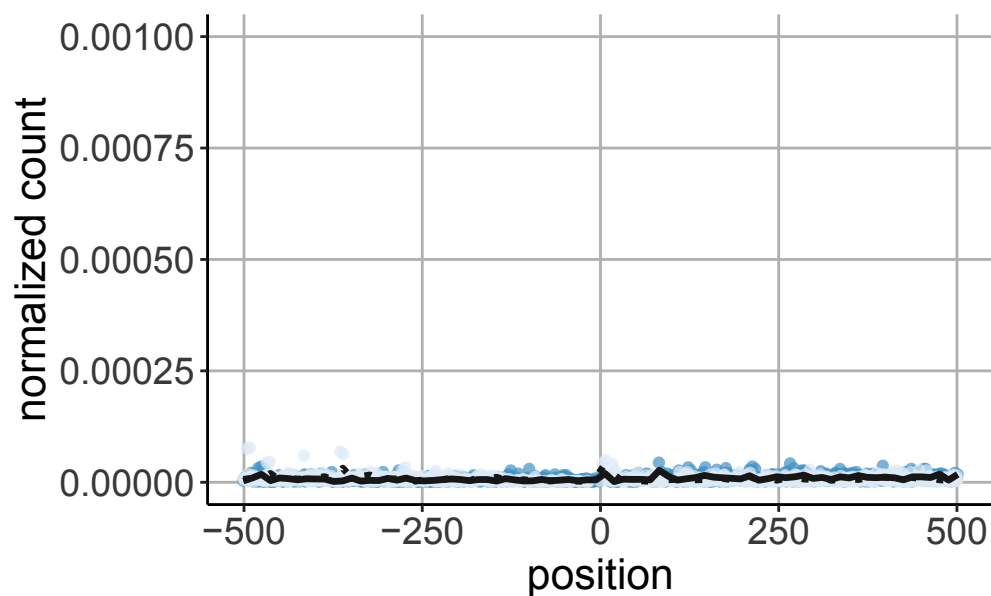

ELAVL4-UUUUAUUUUUG

▪ antisense — sense    • antisense • sense

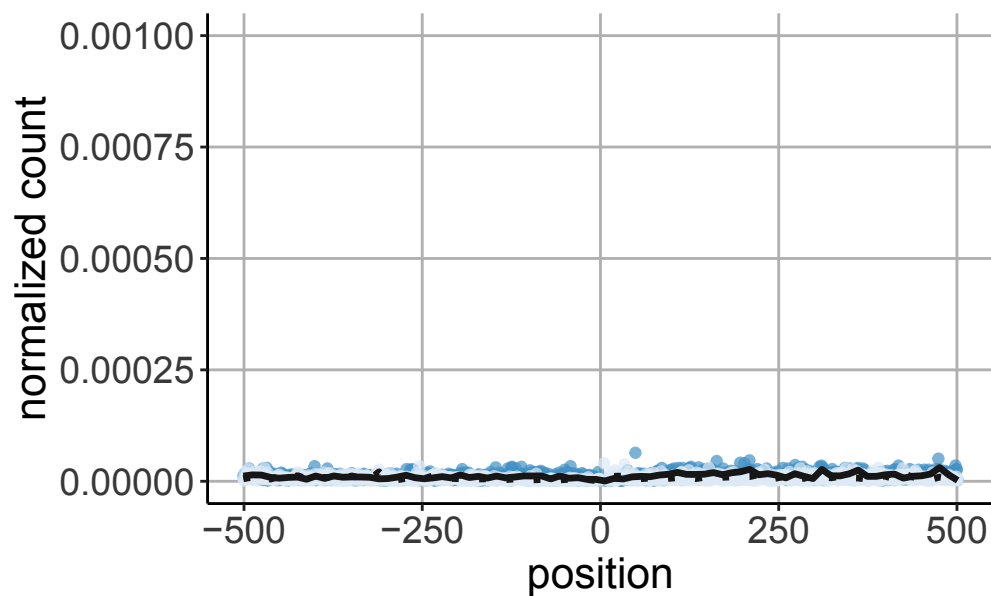

QKI-ACUAACANNACUAACA

▪ antisense — sense    • antisense • sense

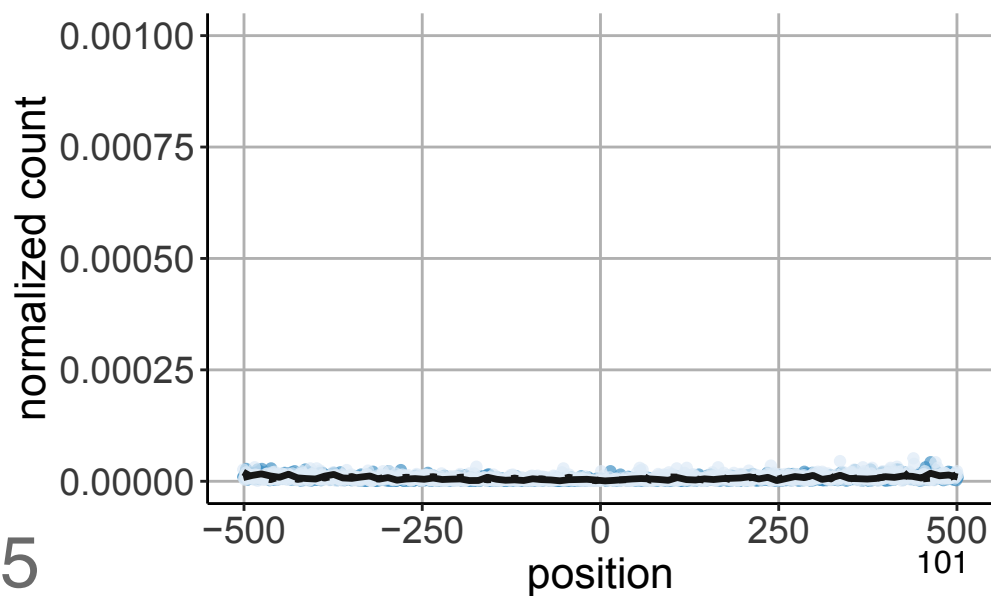

stop codon

TARDBP-GUGUGAAUGG

▪ antisense — sense    • antisense • sense

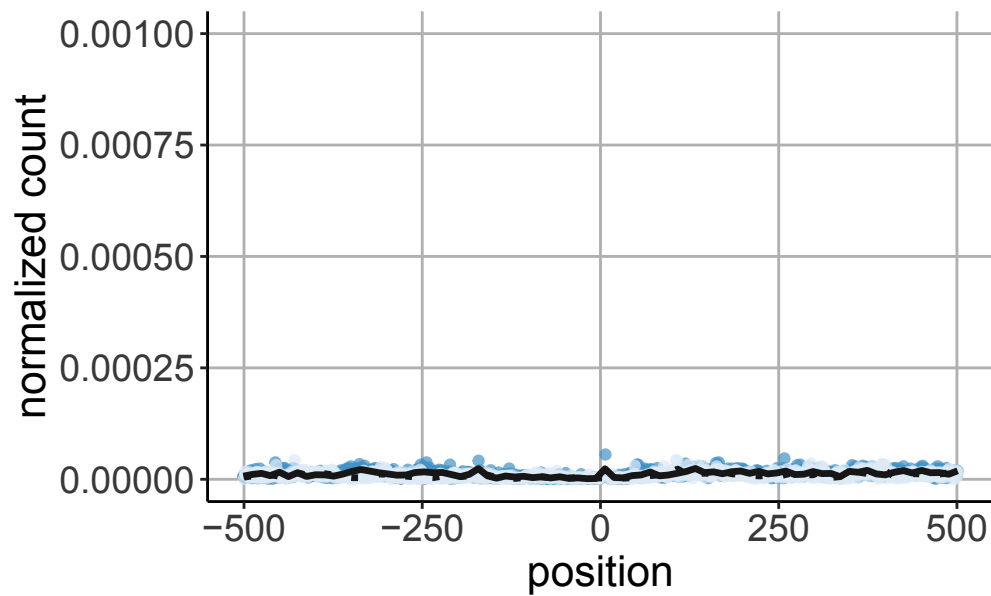

TARDBP-GUGUGNGUGUG

▪ antisense — sense    • antisense • sense

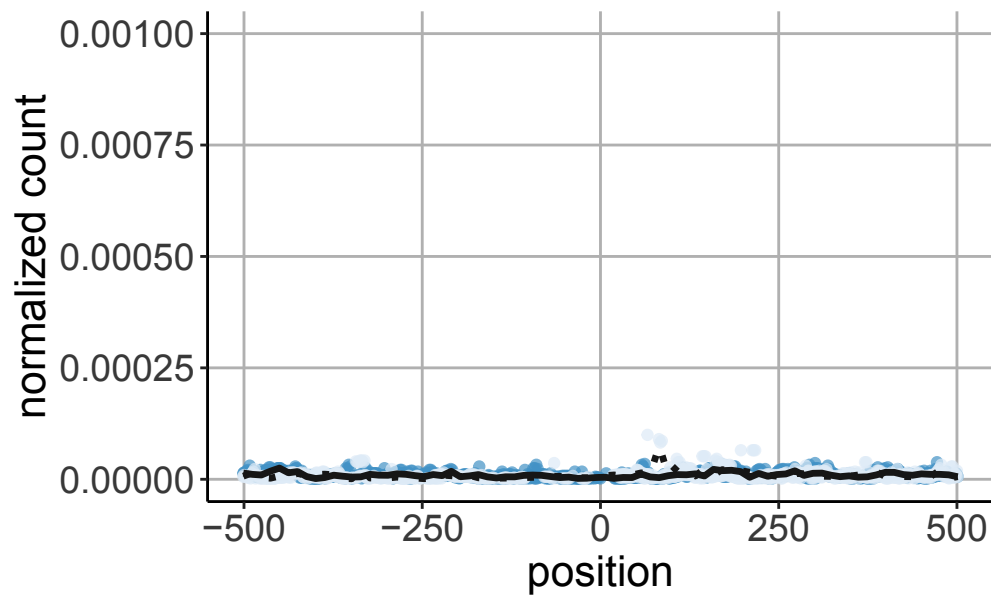

PUM2-NNUGUAYAGK

▪ antisense — sense    • antisense • sense

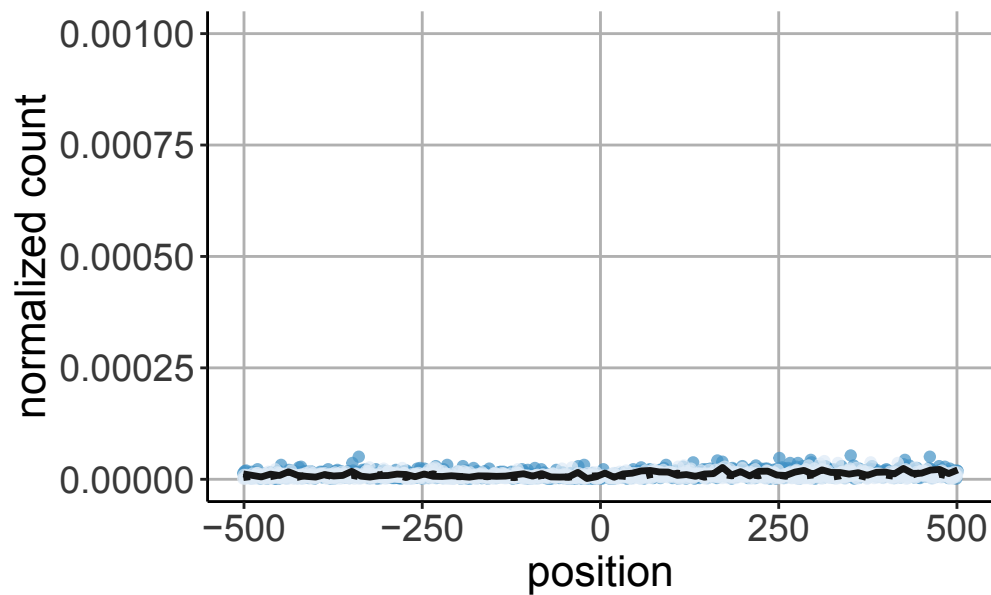

PUM2-NUGUAAAUAGKN

▪ antisense — sense    • antisense • sense

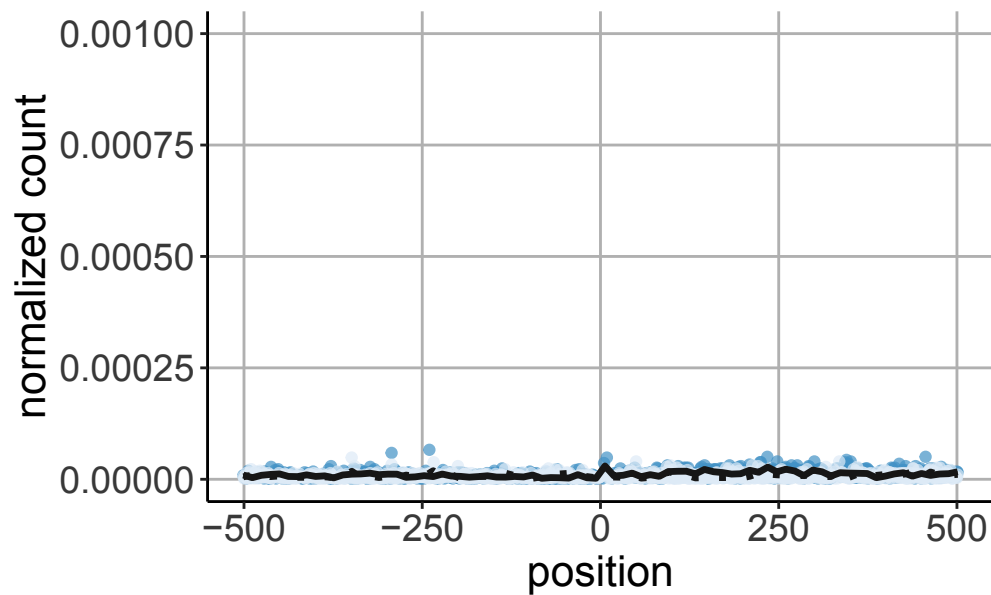

KHDRBS3-UAAANNNNNNNUAAA

▪ antisense — sense    • antisense • sense

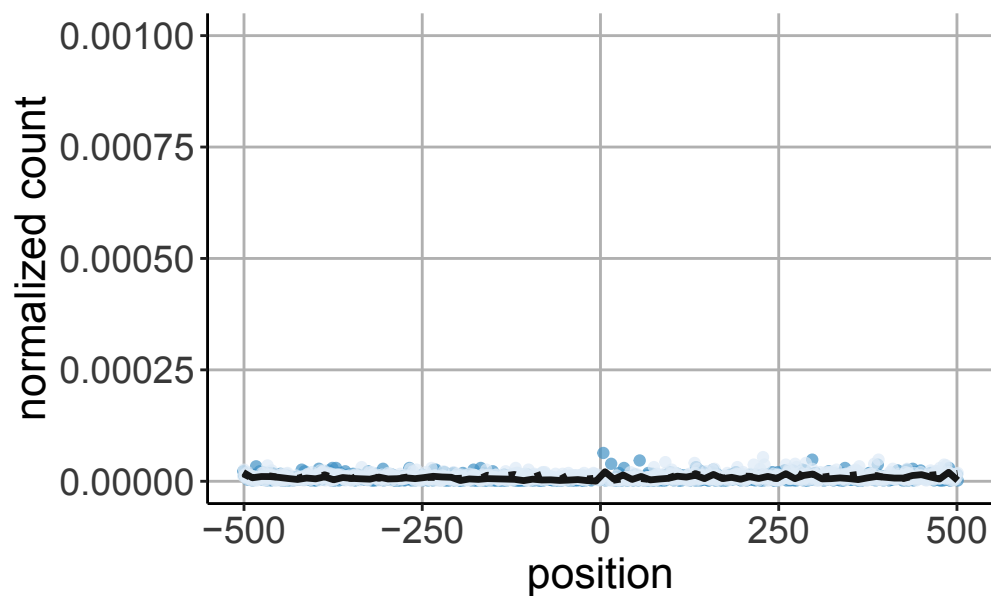

THUMPD1-UUCGUGGCUUG

▪ antisense — sense    • antisense • sense

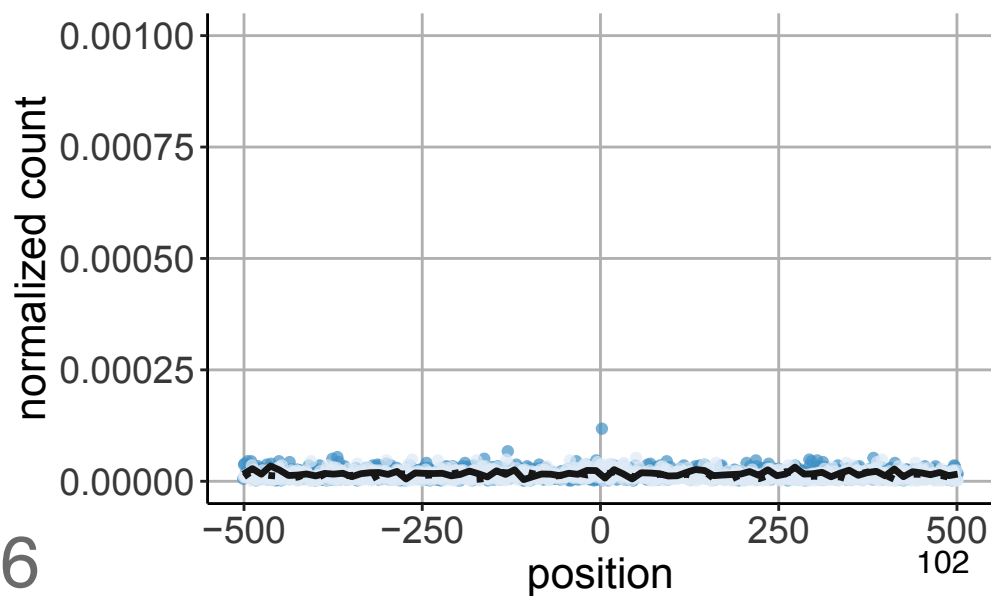

stop codon

THUMPD1-WGCGCGGUYUU

▪ antisense — sense    • antisense • sense

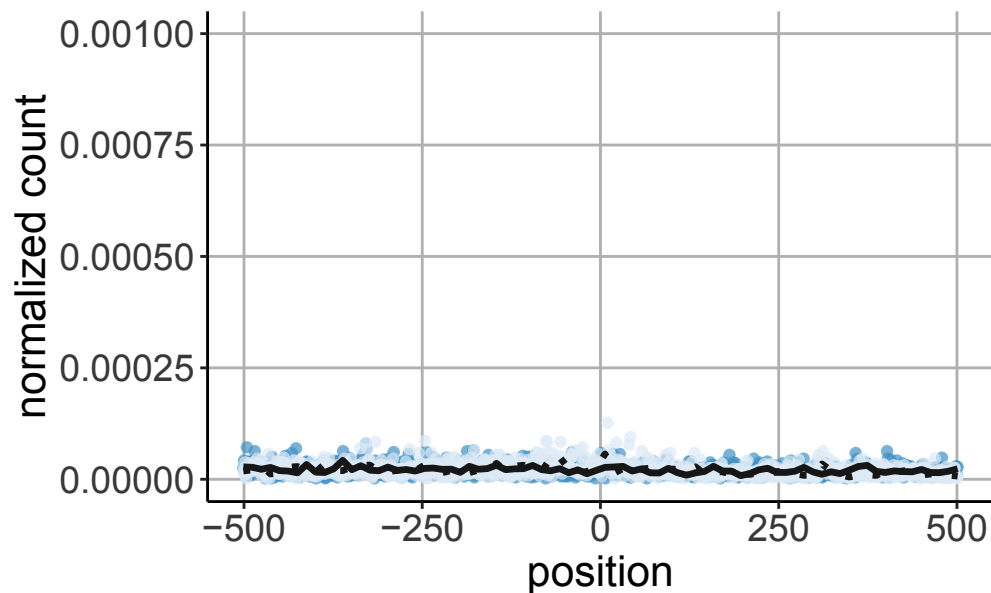

ZFR\_4-GGCACGGAUG

▪ antisense — sense    • antisense • sense

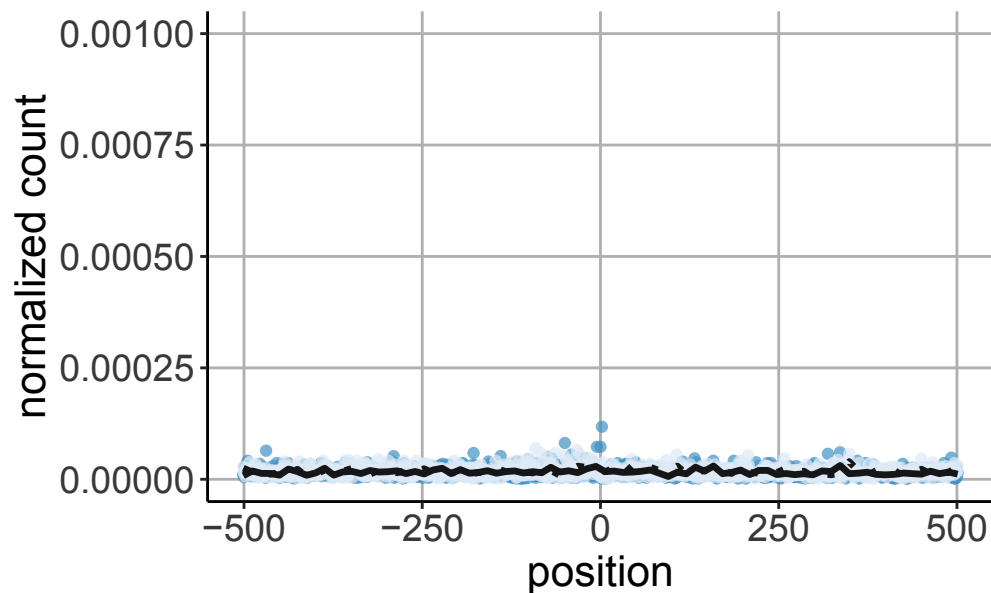

ZFR\_4-UUGCCGGAUGYCGU

▪ antisense — sense    • antisense • sense

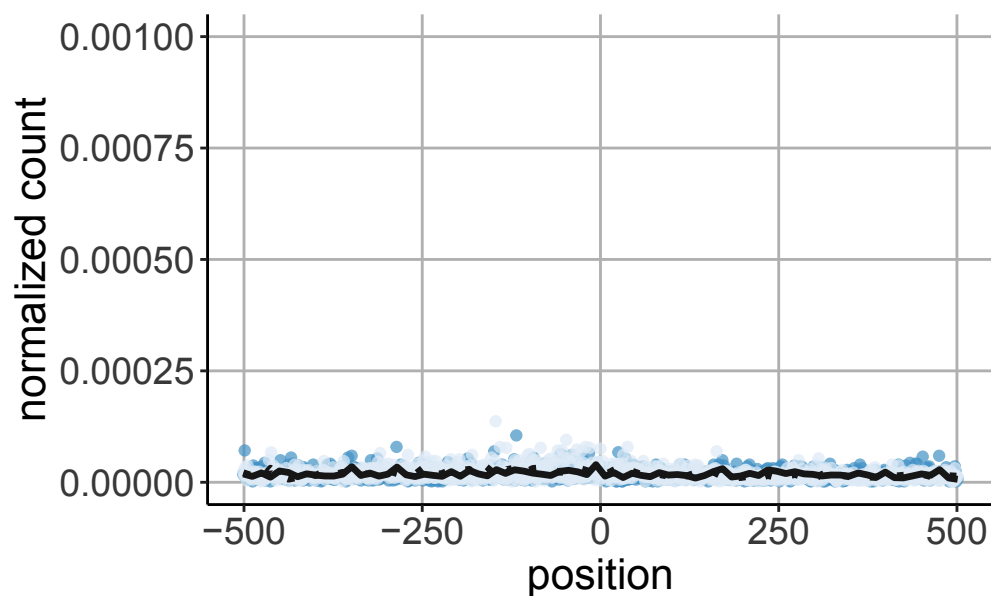

PCBP1-UCCUUNNCCUU

▪ antisense — sense    • antisense • sense

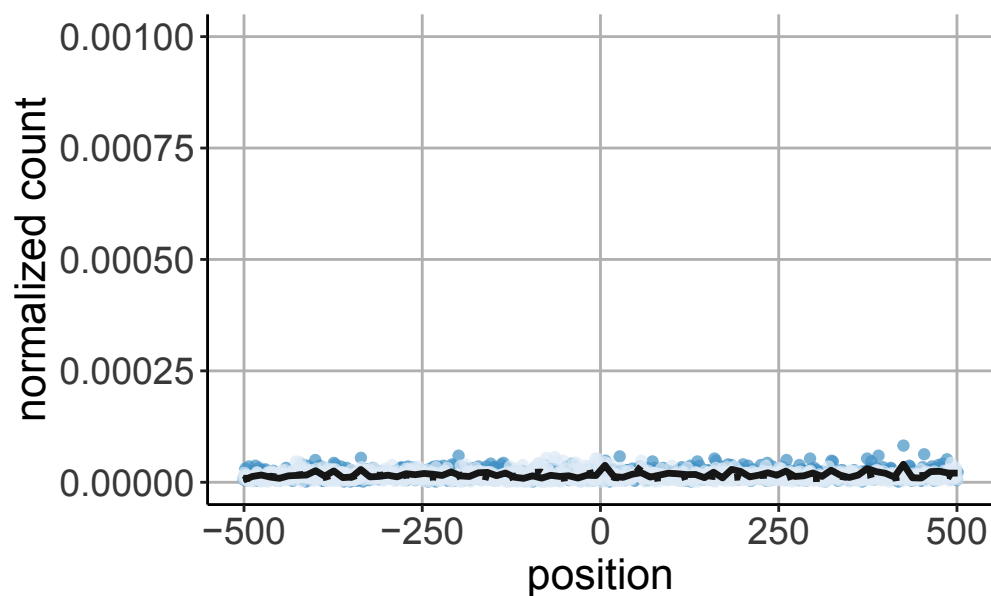

HNRNPA3-UAGGUUAGGG

▪ antisense — sense    • antisense • sense

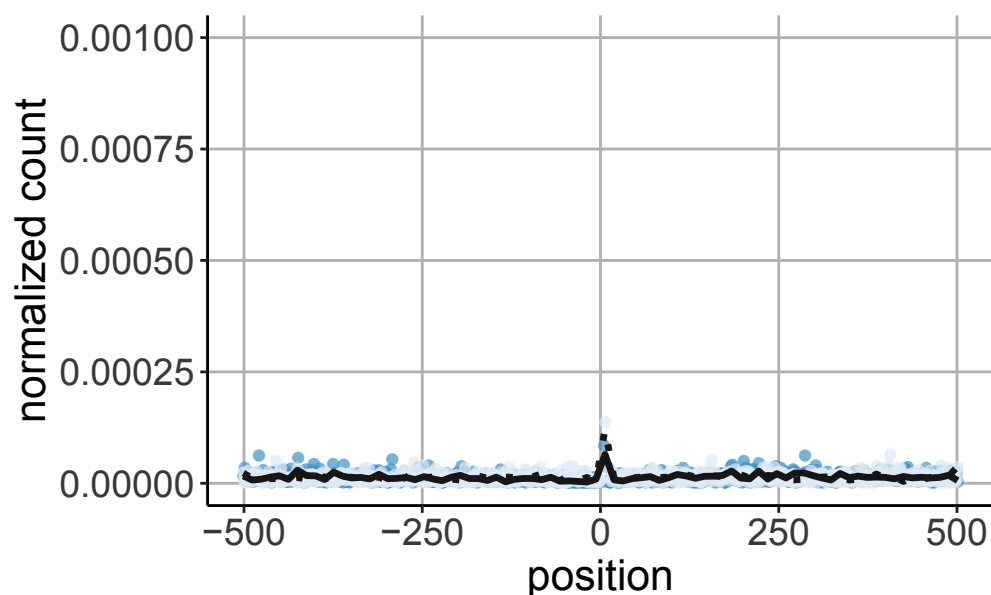

RBM38-KKGUGUGUGUGUKK

▪ antisense — sense    • antisense • sense

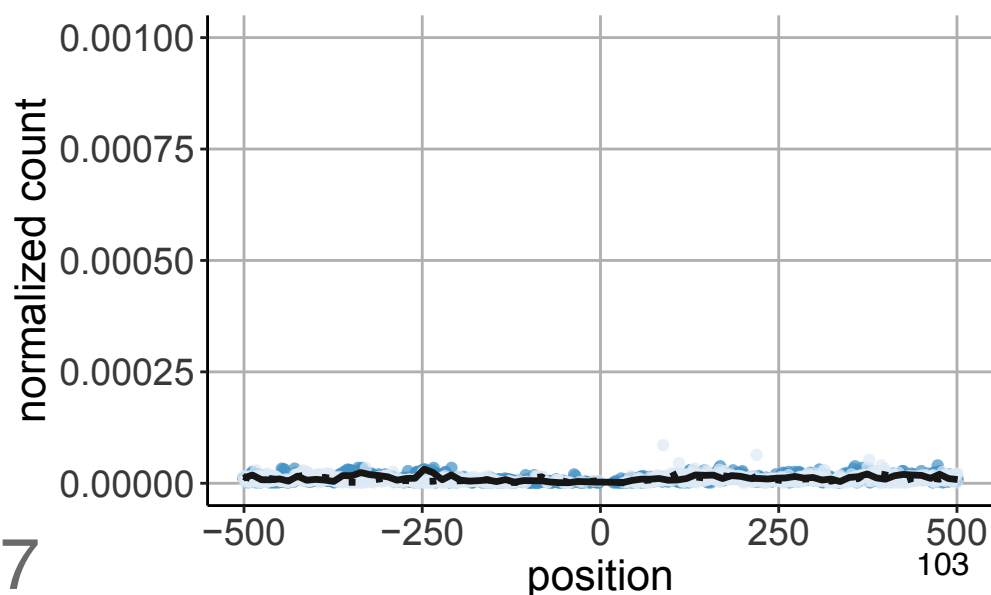



stop codon

MEX3D-UNURUUUAUU

RBPM52-CACAGNGCACA

▪ antisense — sense    • antisense • sense

▪ antisense — sense    • antisense • sense

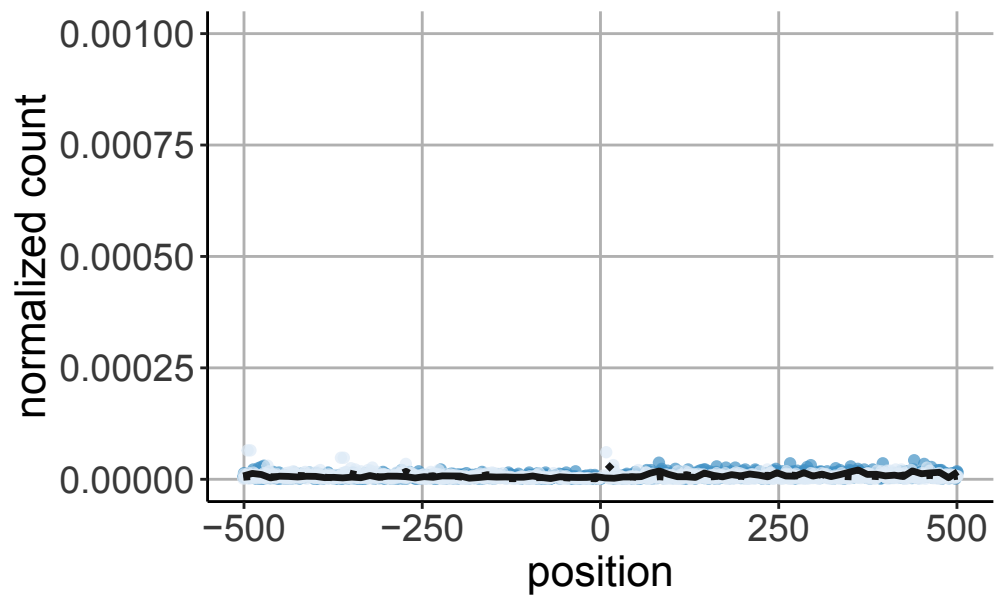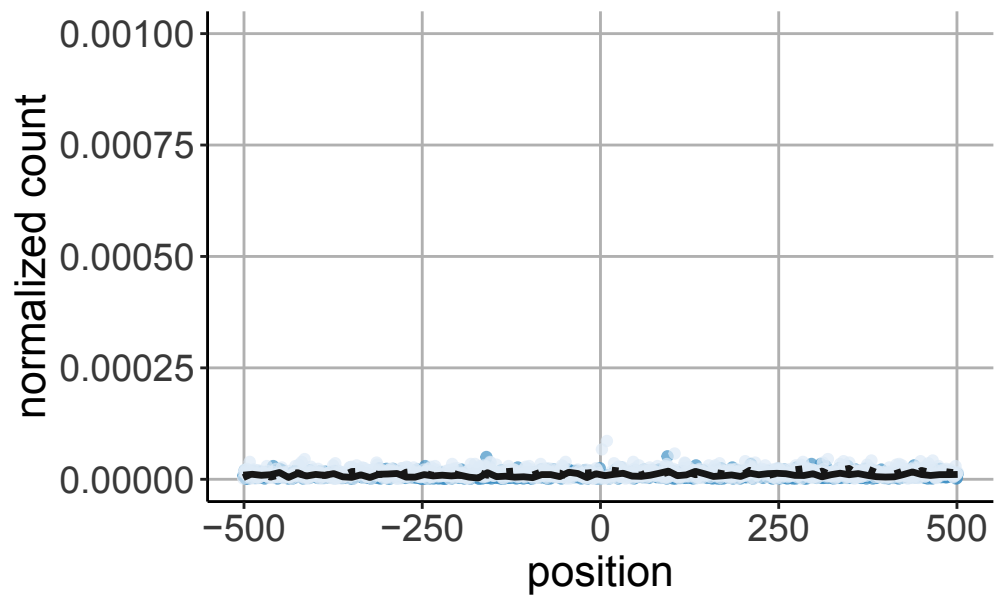

RBPM52-UCACRUGCACA

RBPM52-UGCACA

▪ antisense — sense    • antisense • sense

▪ antisense — sense    • antisense • sense

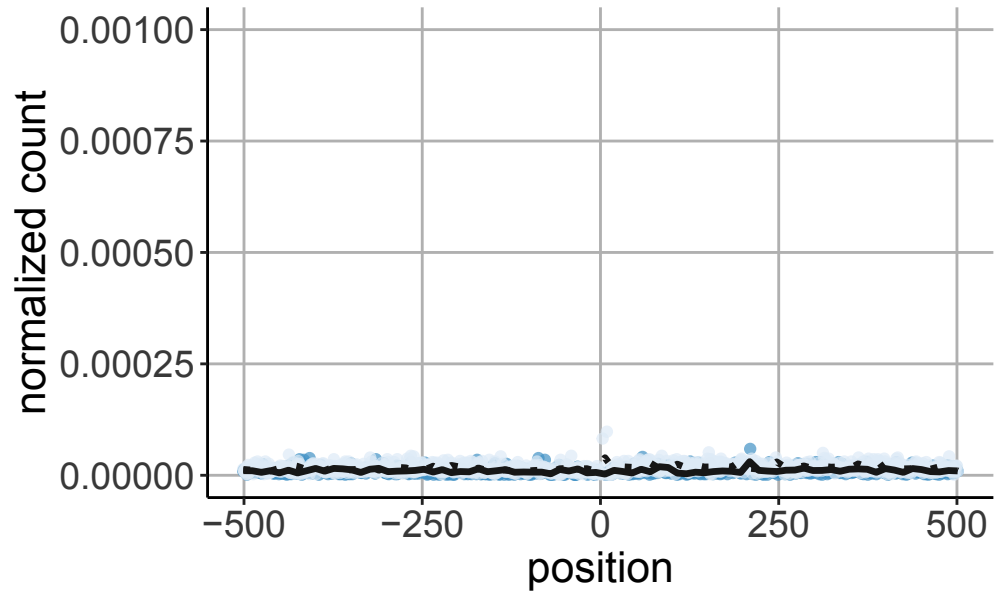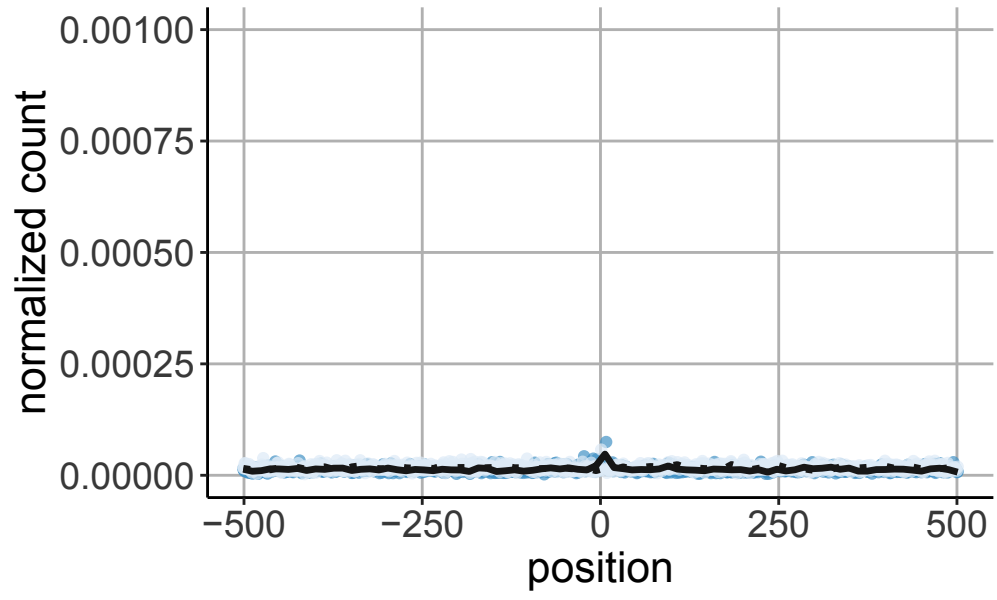

YBX2-GCCAUNNNAUCGC

YBX2-NUAACAUCNN

▪ antisense — sense    • antisense • sense

▪ antisense — sense    • antisense • sense

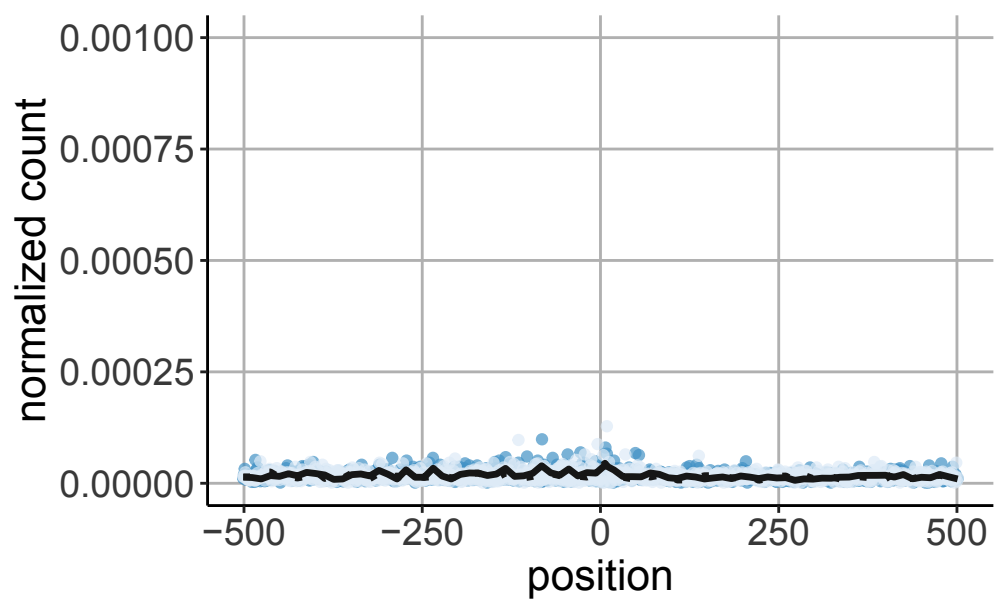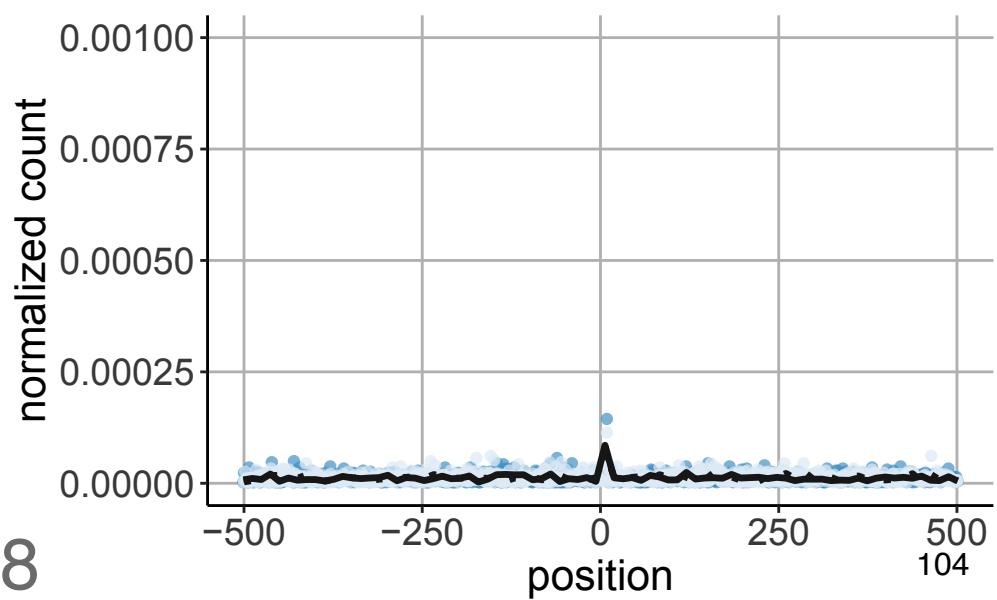

stop codon

CSTF2T-CGUAGCGUCU

• antisense — sense • antisense • sense

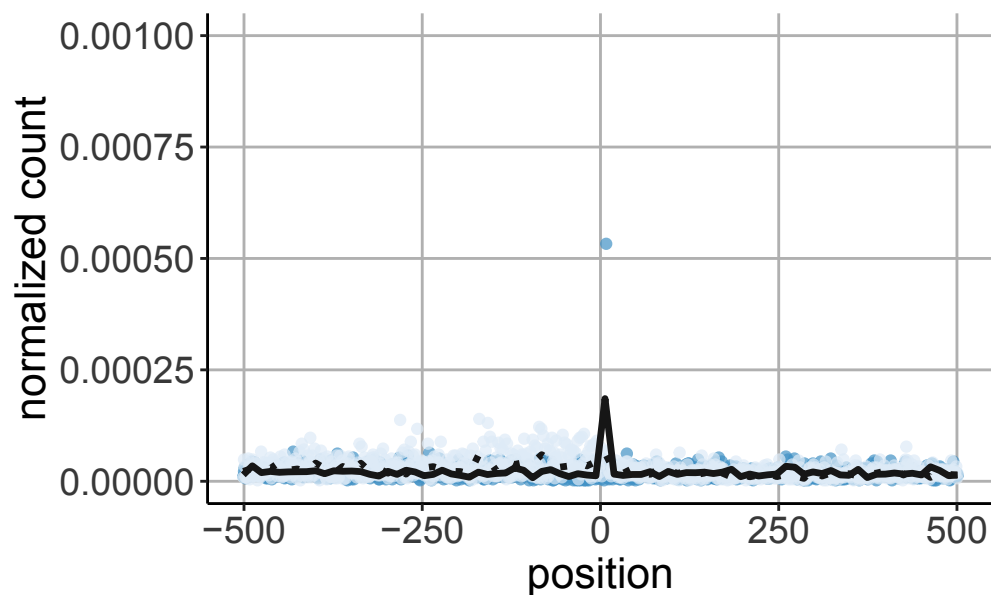

SNRNP70-GNUCANGNG

• antisense — sense • antisense • sense

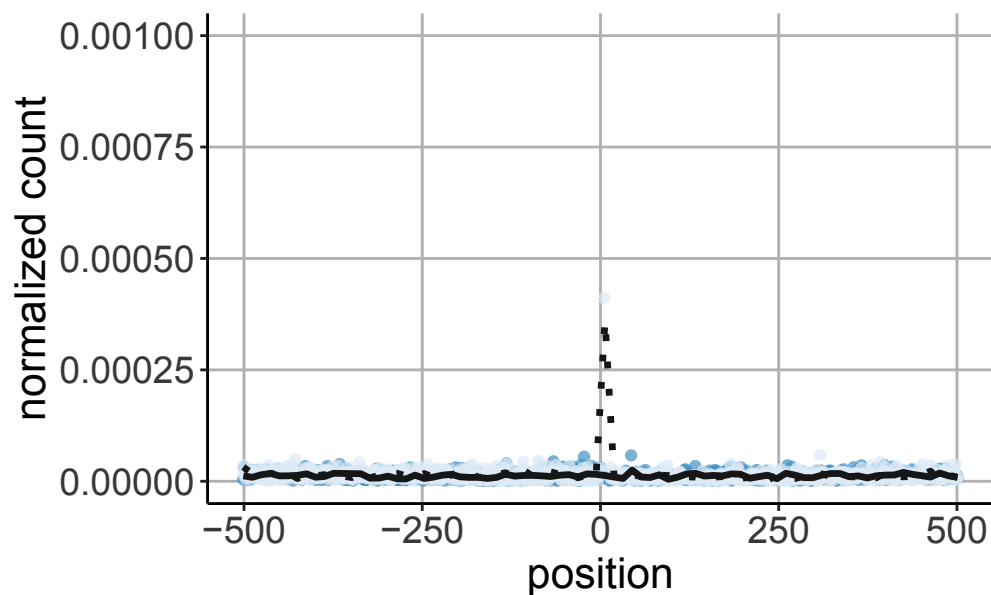

SNRNP70-GUUCAAGGUG

• antisense — sense • antisense • sense

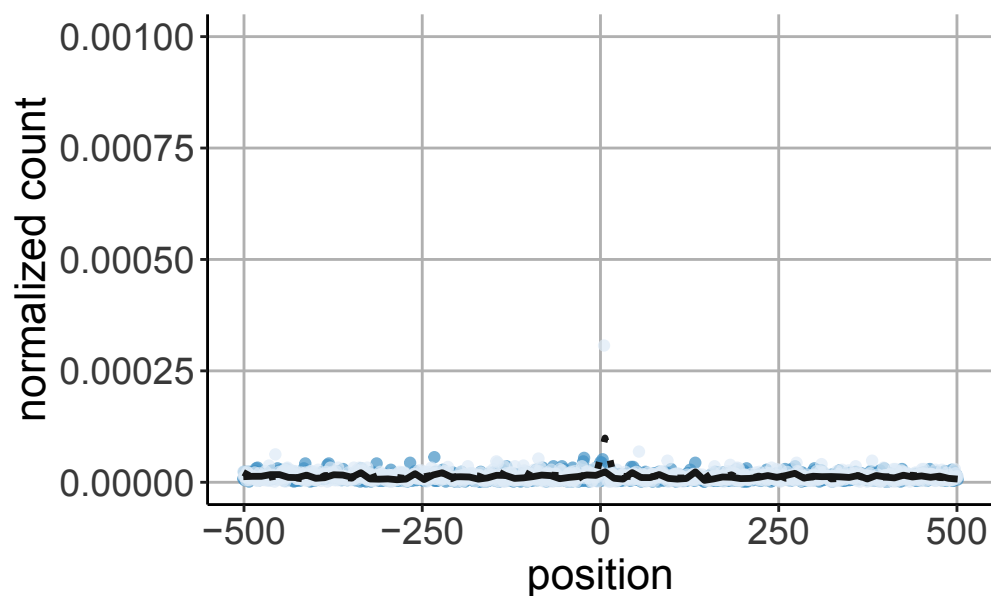

DAZ4-GYUCUAGUUAGYAUC

• antisense — sense • antisense • sense

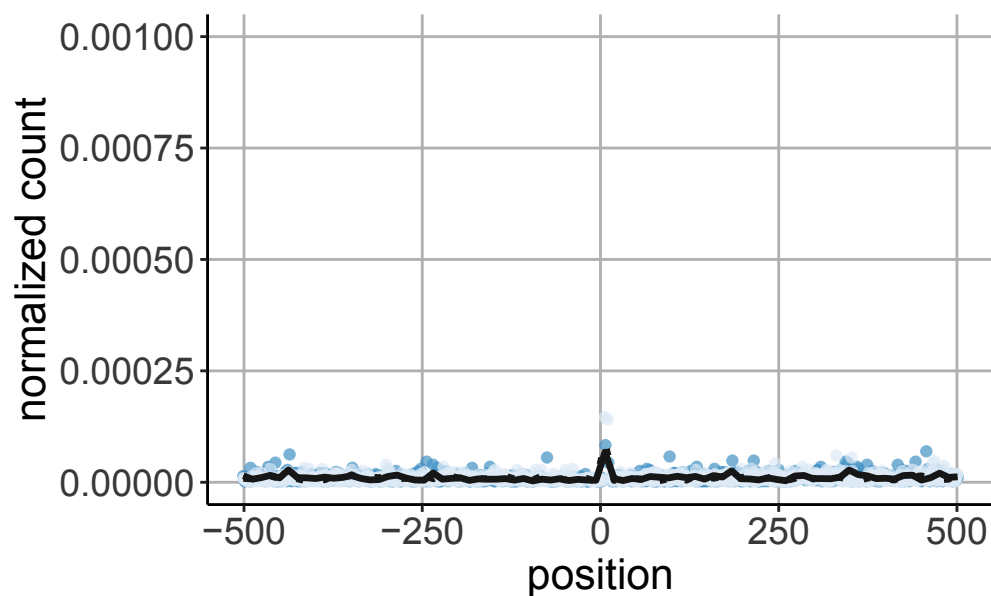

IGF2BP1-CAGNUWCA

• antisense — sense • antisense • sense

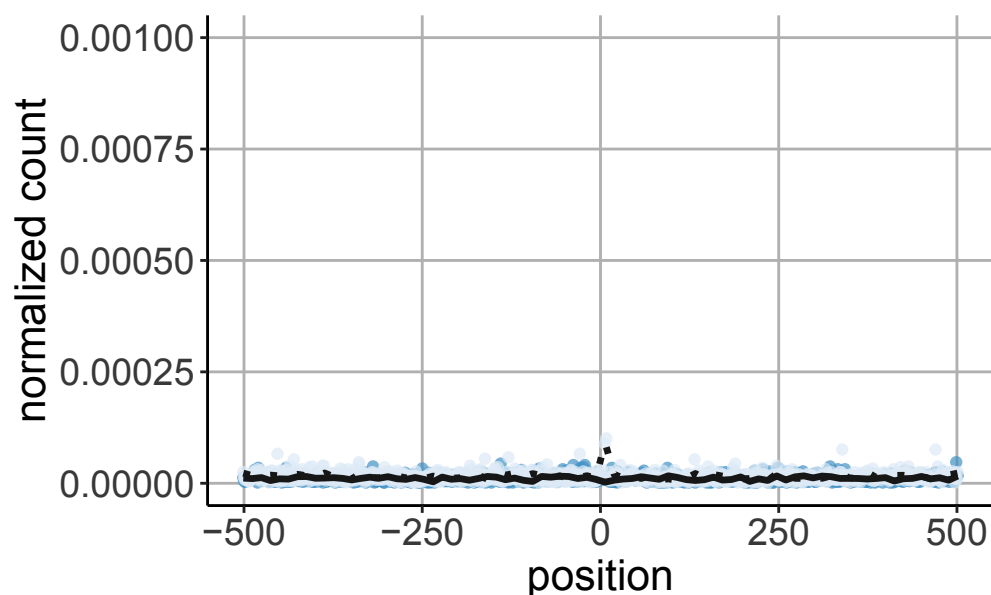

HEXIM2-NGCGACGGKN

• antisense — sense • antisense • sense

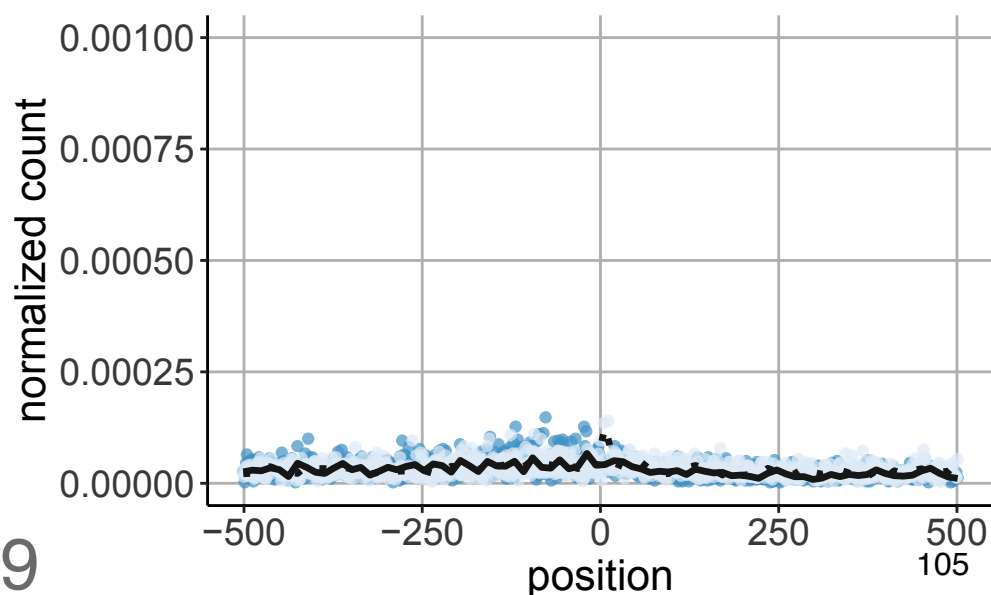

stop codon

YBX1-NUAACAU CGGG

▪ antisense — sense    • antisense • sense

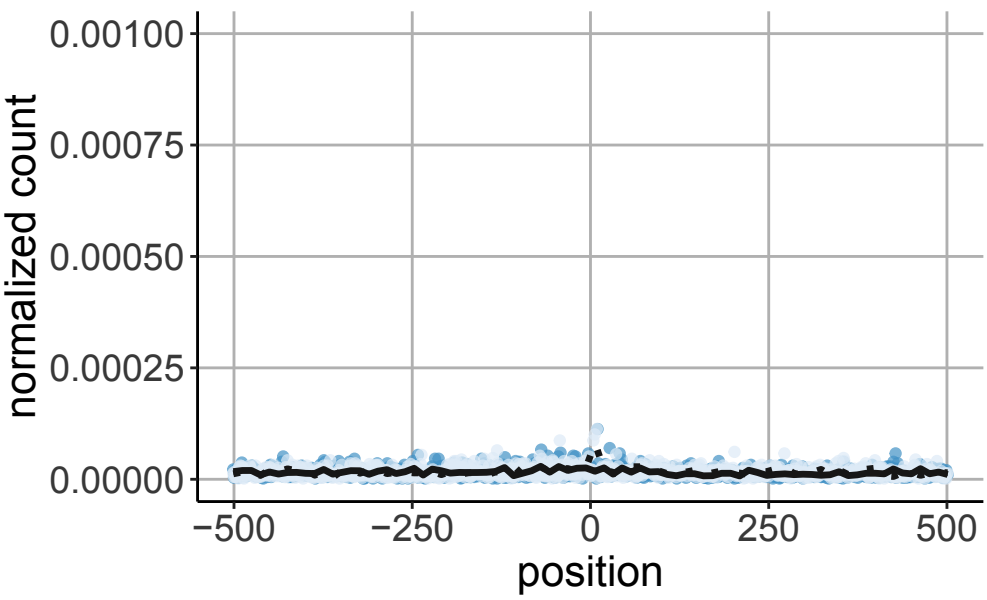

RBM24-GUGUGNGUGUG

▪ antisense — sense    • antisense • sense

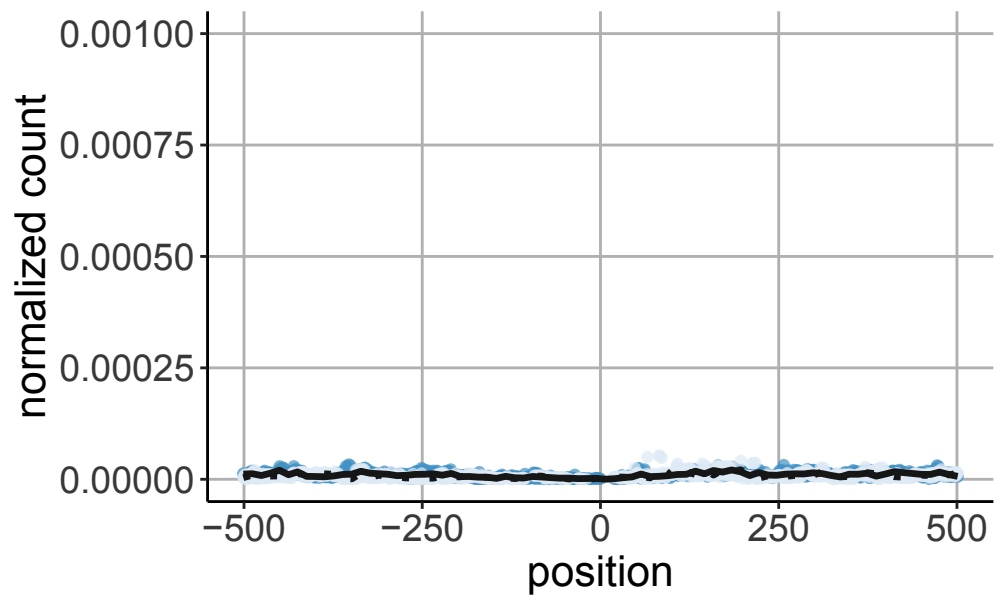

CSDA-UAACAUCA

▪ antisense — sense    • antisense • sense

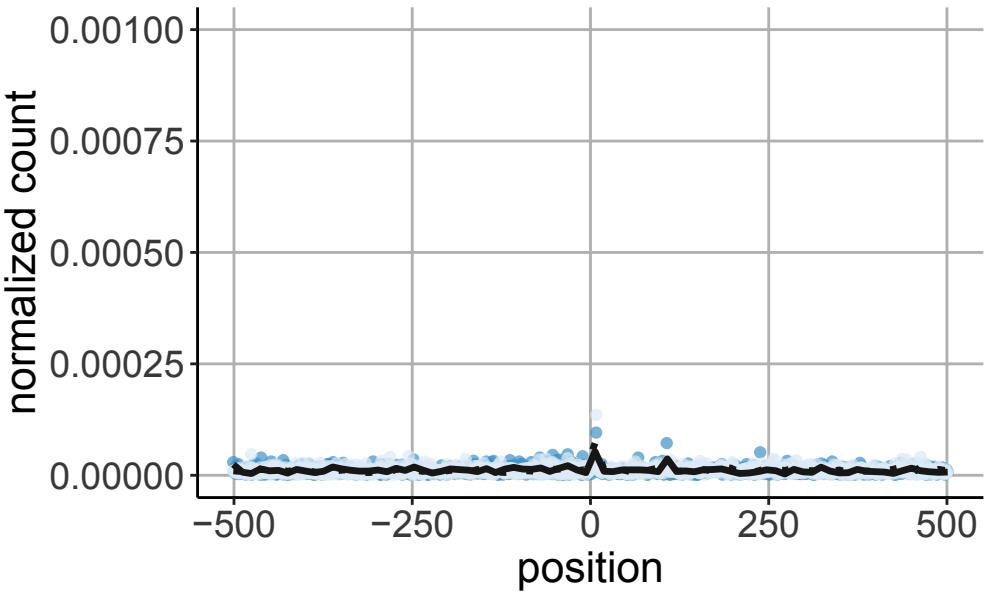

HNRNPA1L2-NUAGGUUAGGGW

▪ antisense — sense    • antisense • sense

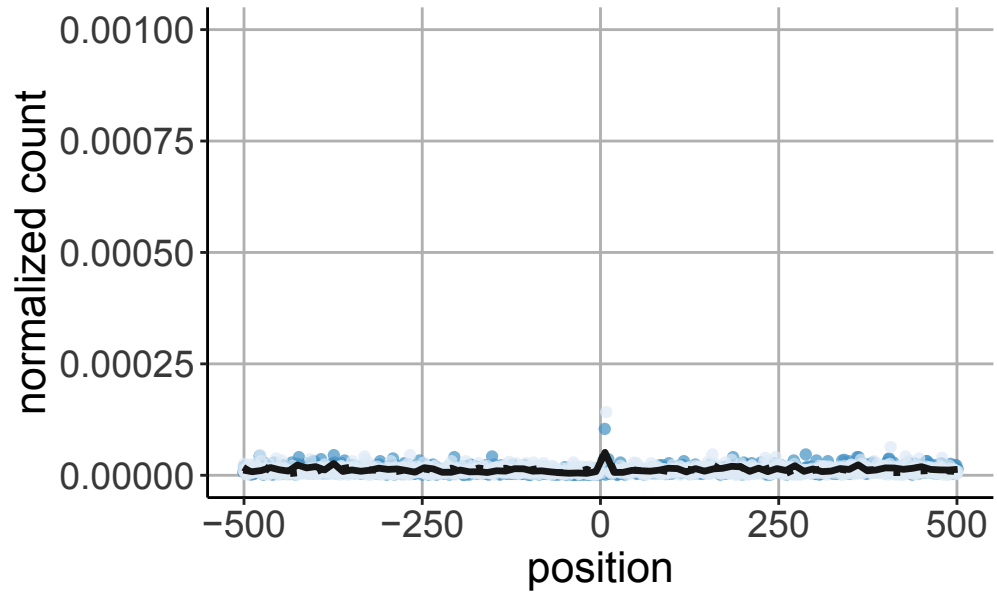

ZC3H12B-NGCGNCAGUCGGUAGCN

▪ antisense — sense    • antisense • sense

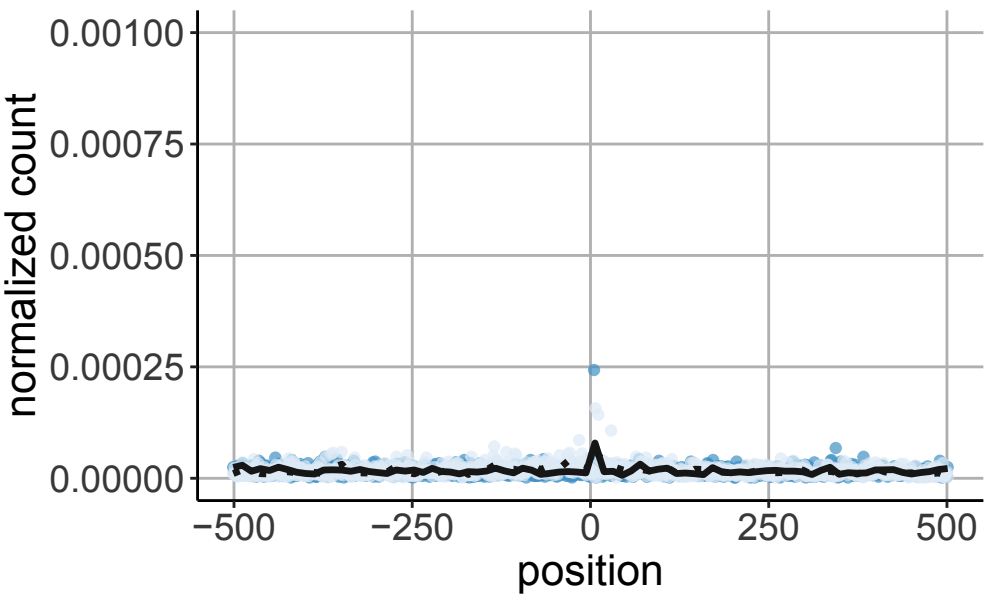

ZC3H12A-NUUGCCAWAGUKU

▪ antisense — sense    • antisense • sense

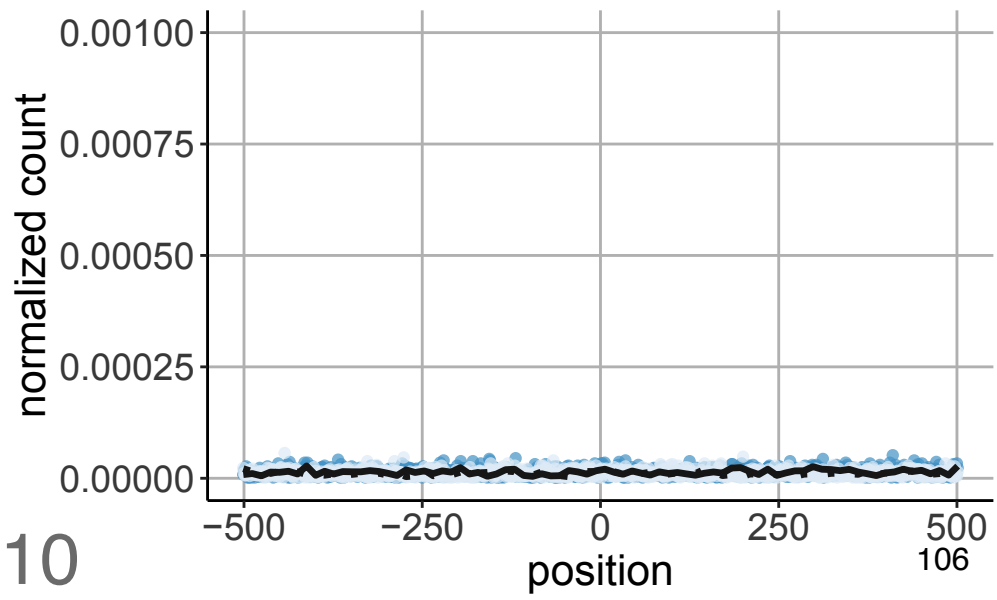

stop codon DAZAP1-UUAGGUUAGG

▪ antisense — sense • antisense • sense

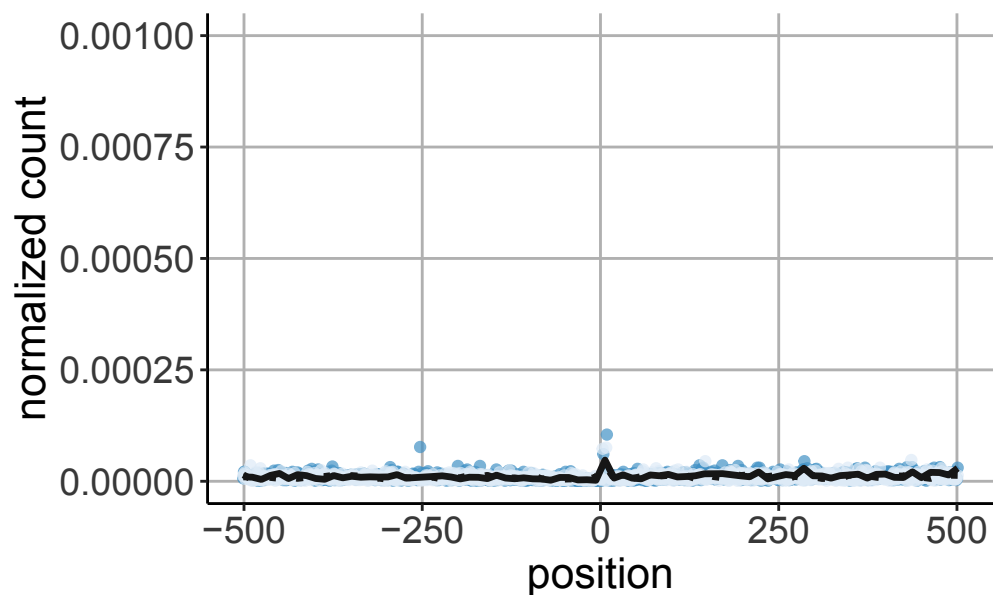

CARHSP1-GCCAUGAUGAU

▪ antisense — sense • antisense • sense

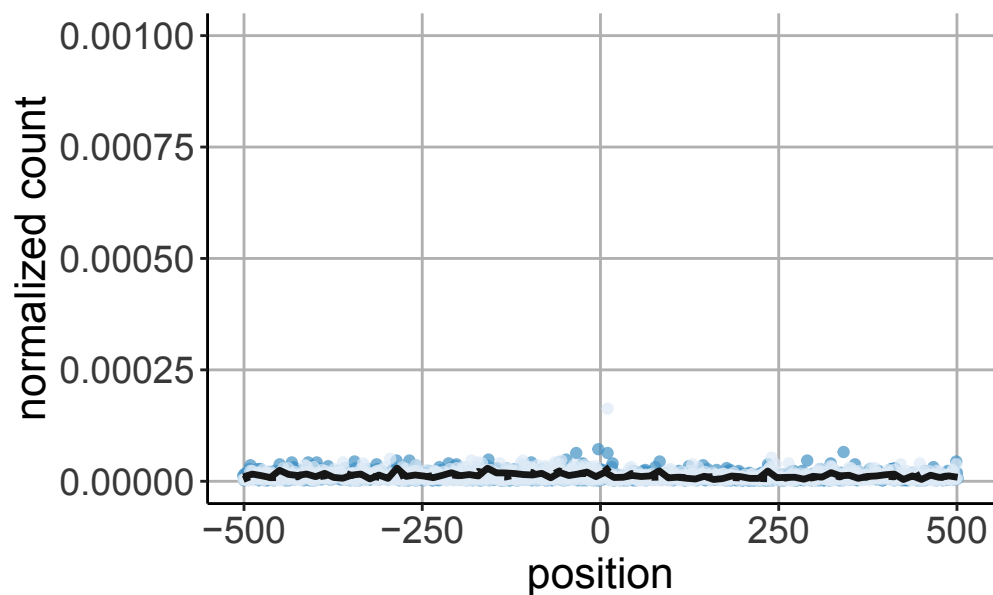

CARHSP1-UUGCCUUGUCCCGAU

▪ antisense — sense • antisense • sense

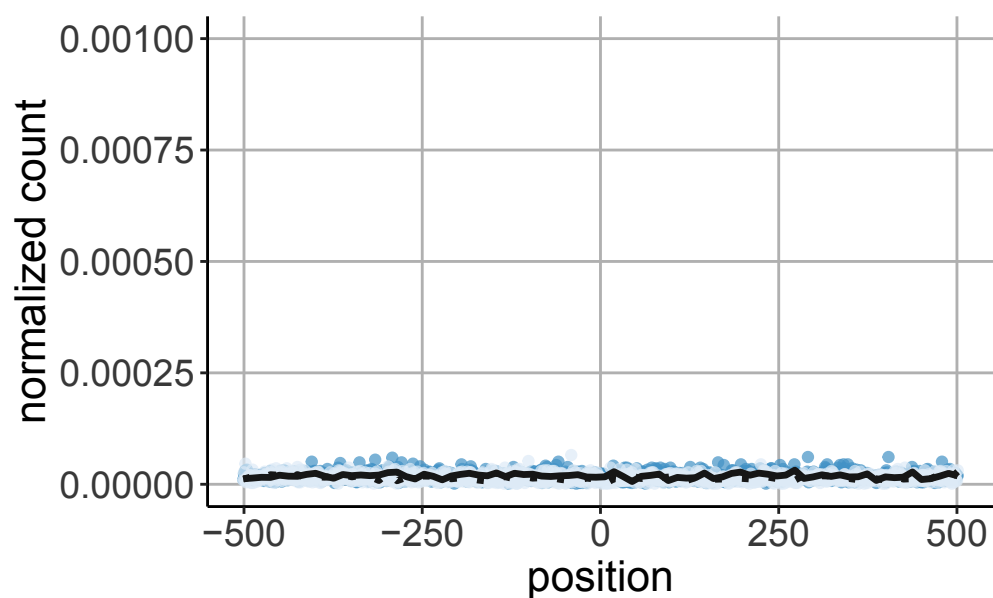

RNPC3-GGGUSUACGGGGU

▪ antisense — sense • antisense • sense

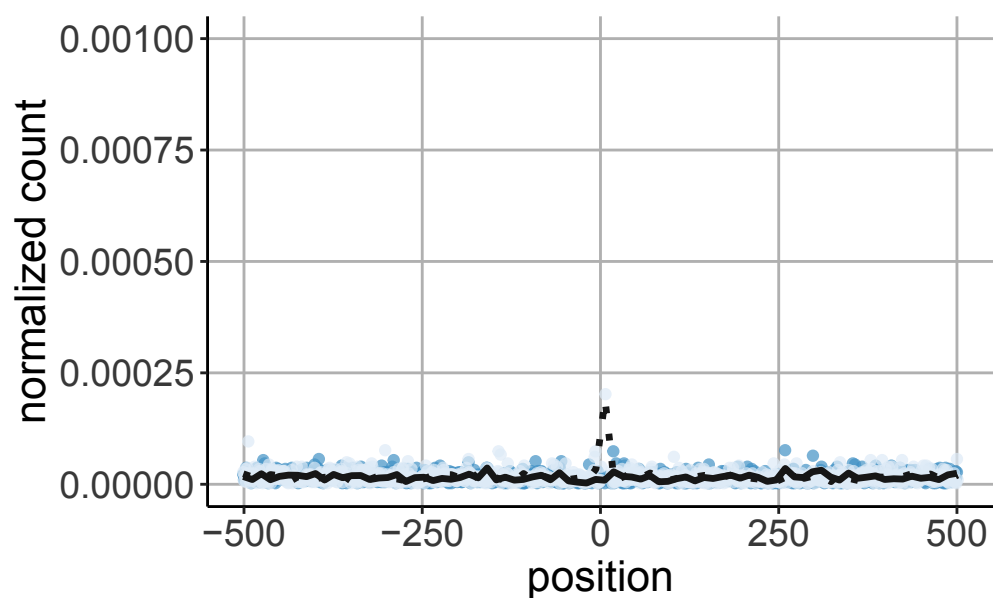

ELAVL1-UUUAUGNUUU

▪ antisense — sense • antisense • sense

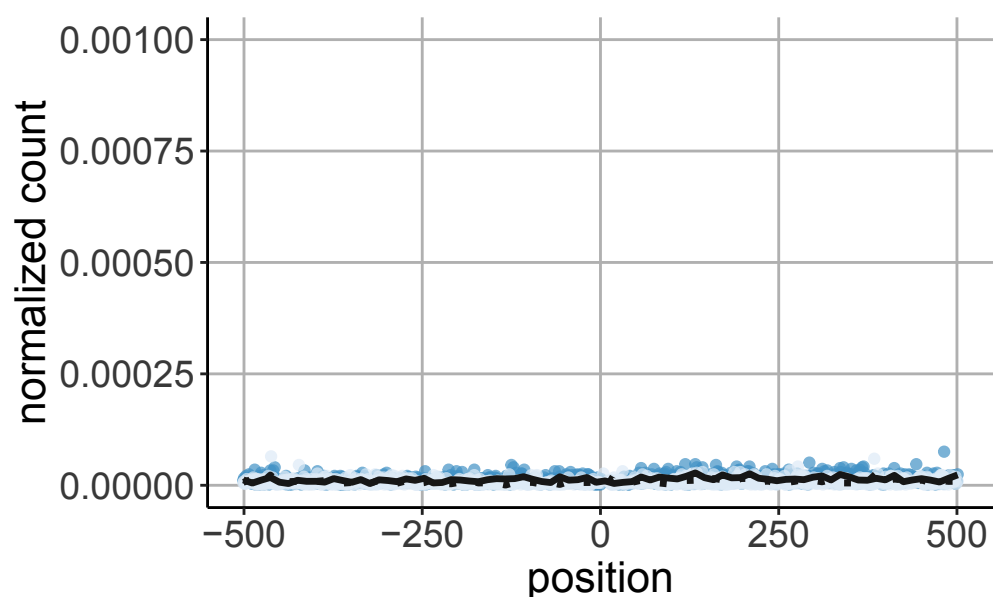

RBM46-GUGAUUG

▪ antisense — sense • antisense • sense

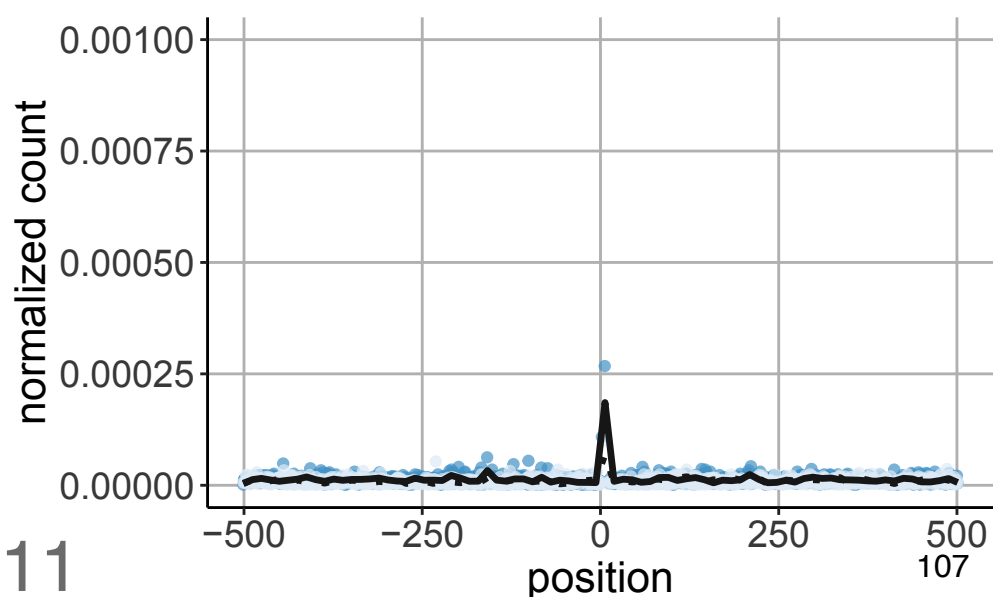

stop codon

ESRP1\_3-GGUGUGGUGU

▪ antisense — sense    • antisense • sense

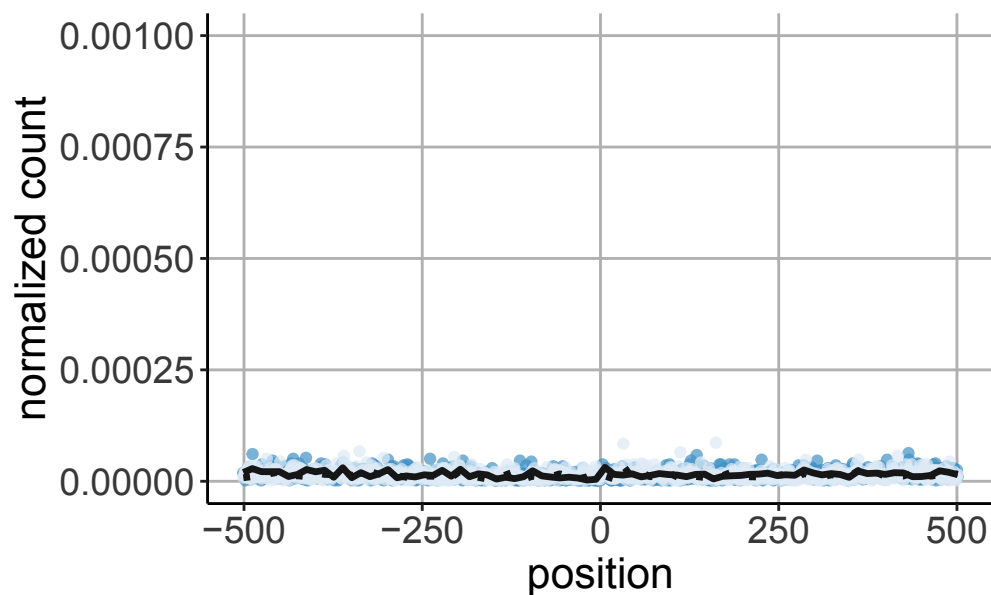

SNRPB2-GGGUGUGCAC

▪ antisense — sense    • antisense • sense

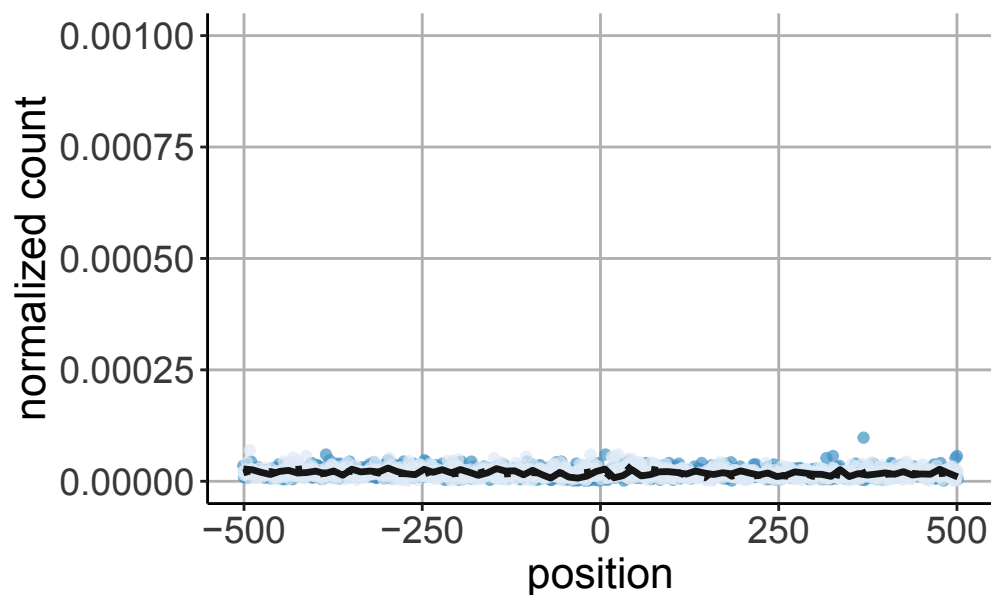

SNRPB2-NNCAUUGCACN

▪ antisense — sense    • antisense • sense

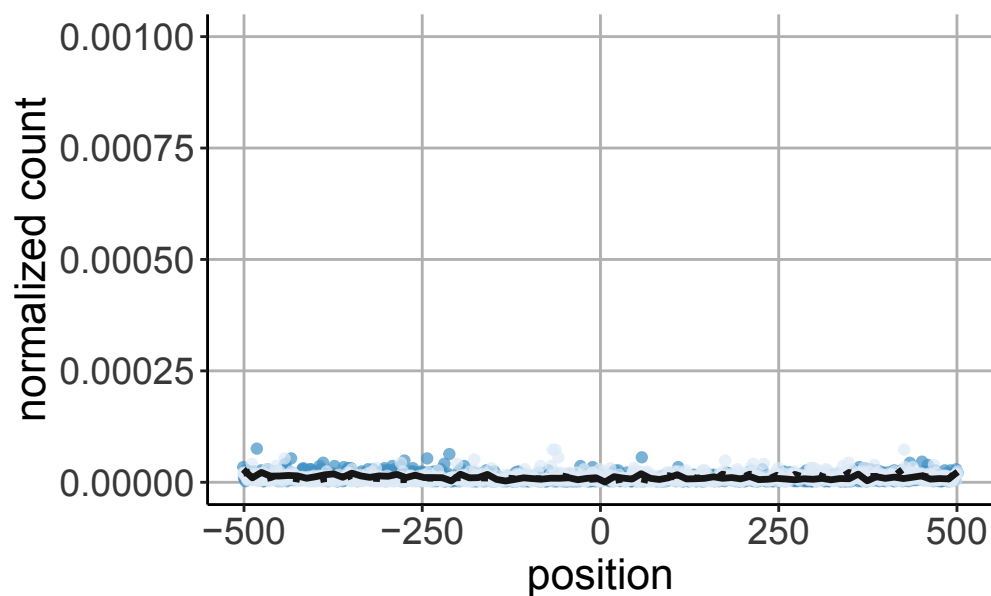

MEX3C-NNAGAGUUUAUNN

▪ antisense — sense    • antisense • sense

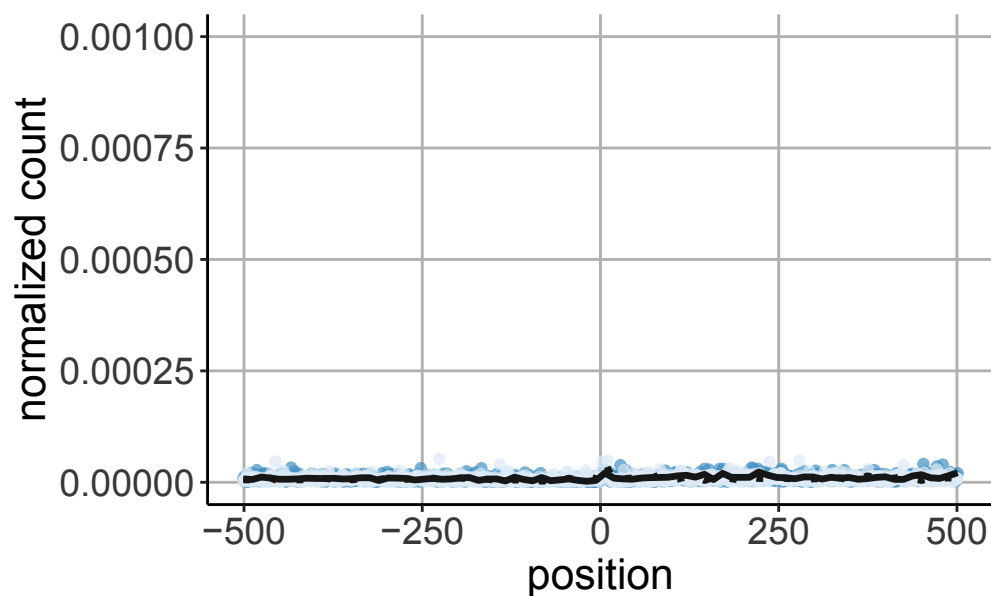

HNRNPA0-KUAGKUUAGGK

▪ antisense — sense    • antisense • sense

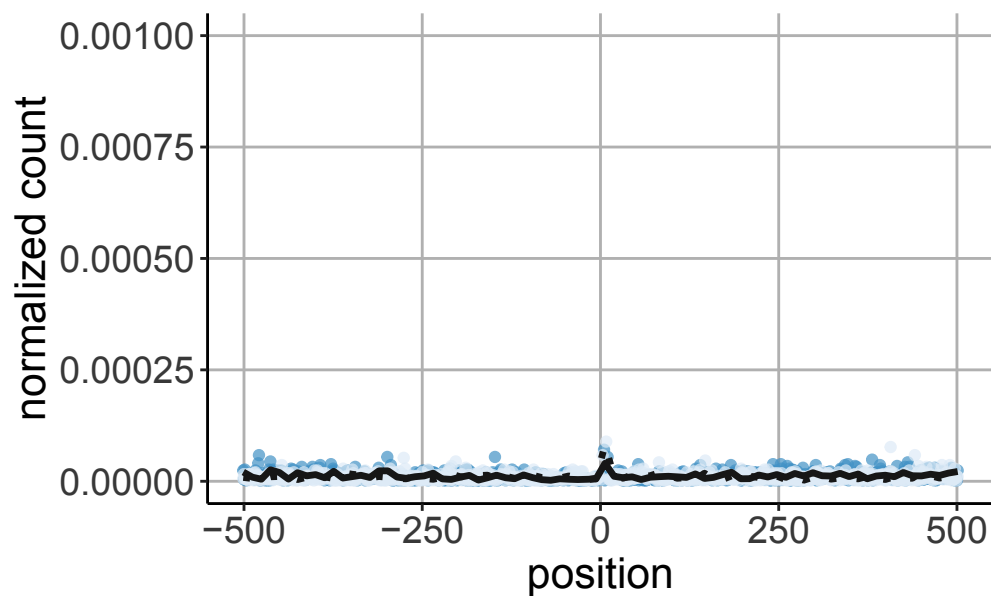

HNRNPA0-KUAGKUUUAGGK

▪ antisense — sense    • antisense • sense

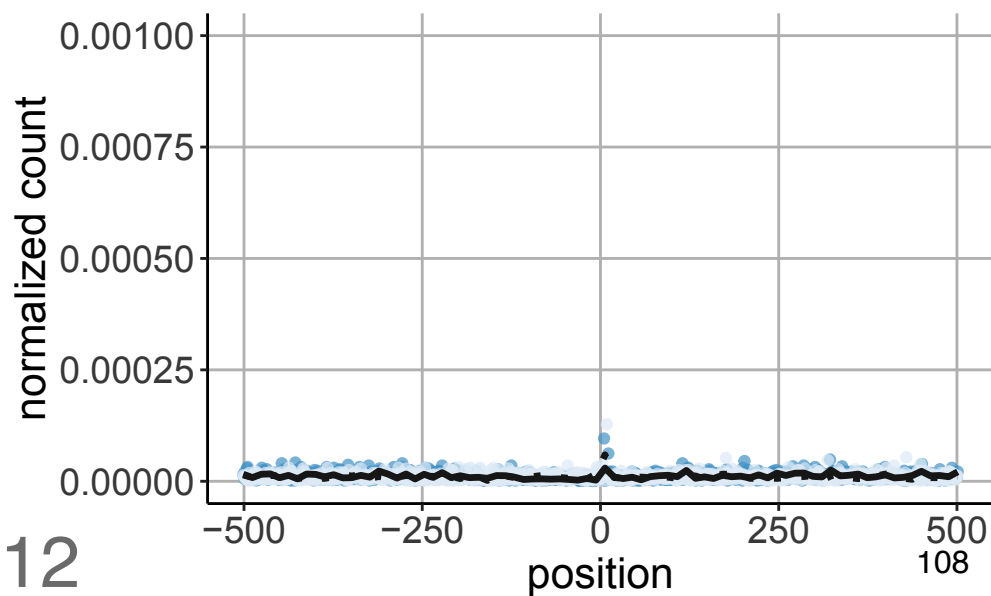

stop codon

SNRPA-CAUUGCACN

▪ antisense — sense    • antisense • sense

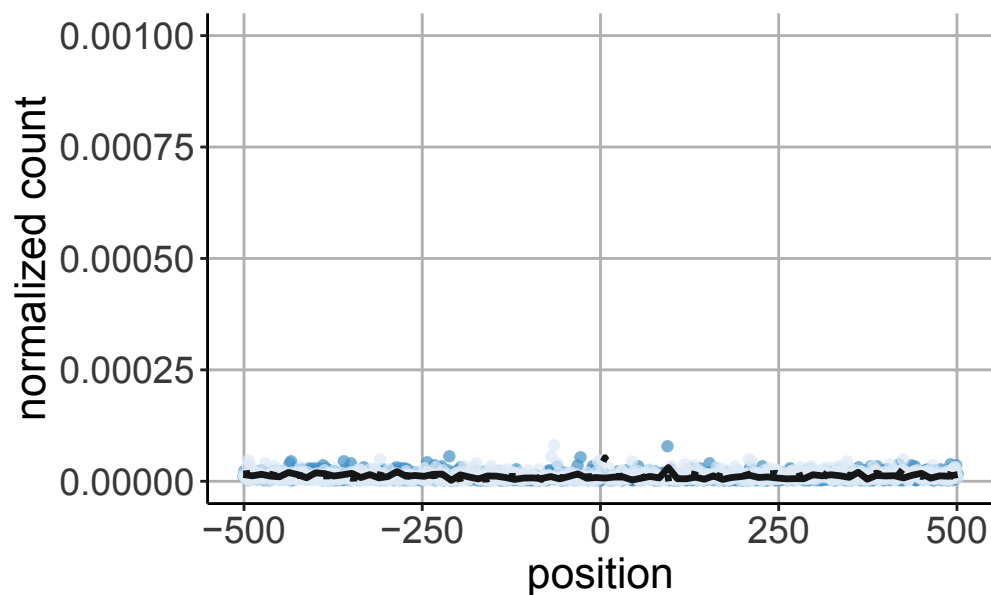

SNRPA-NUGCACR

▪ antisense — sense    • antisense • sense

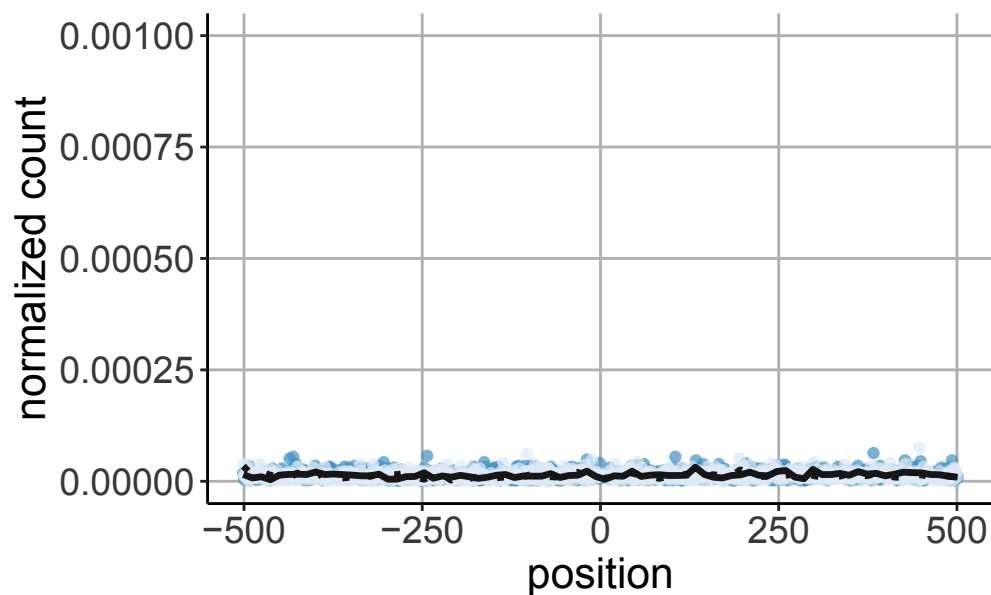

MEX3B\_3-UAGAGUUUUAU

▪ antisense — sense    • antisense • sense

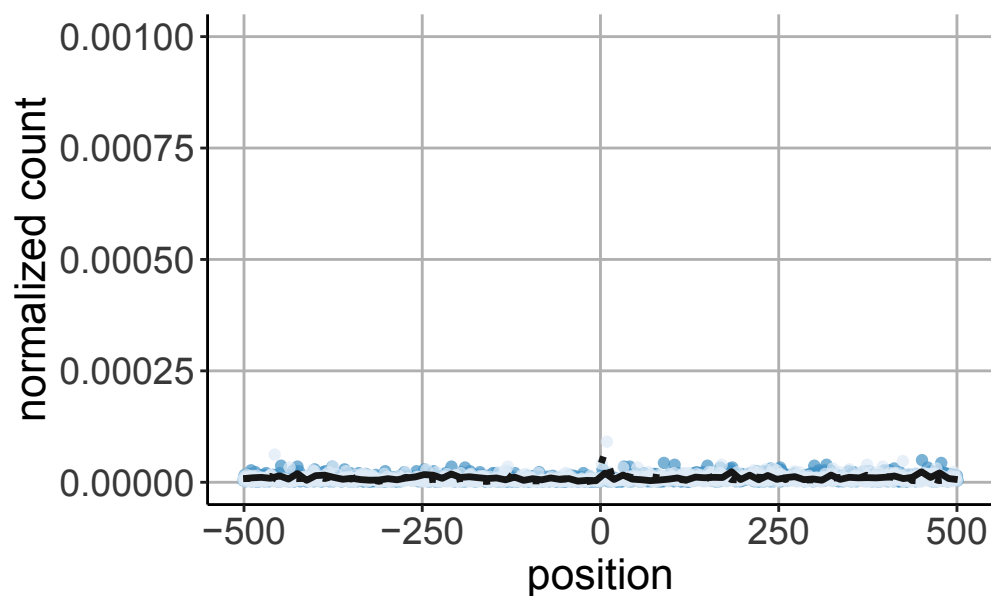

MEX3B\_3-UAUUUUAU

▪ antisense — sense    • antisense • sense

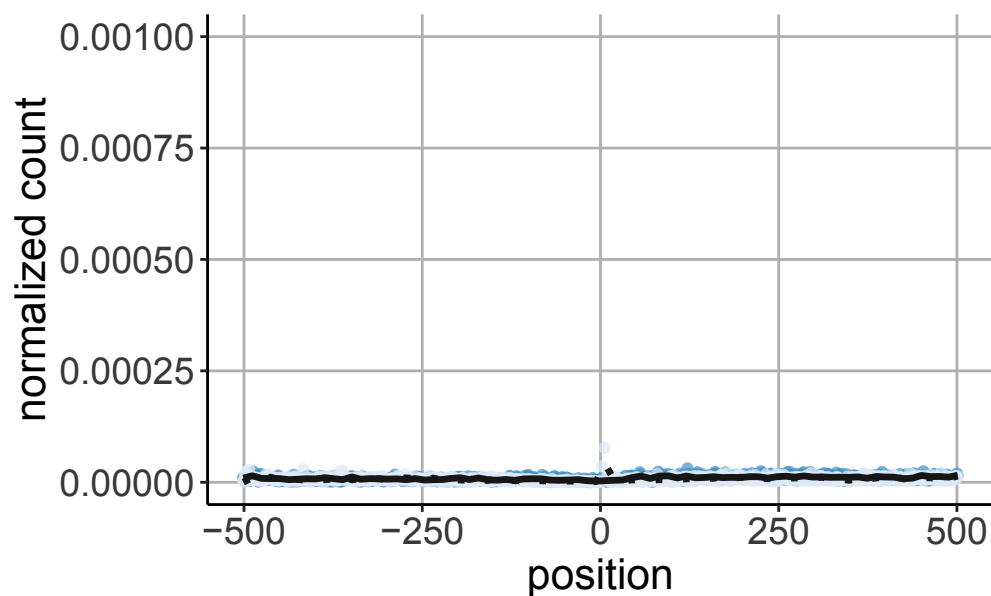

KHDRBS2-UAAACAAUAA

▪ antisense — sense    • antisense • sense

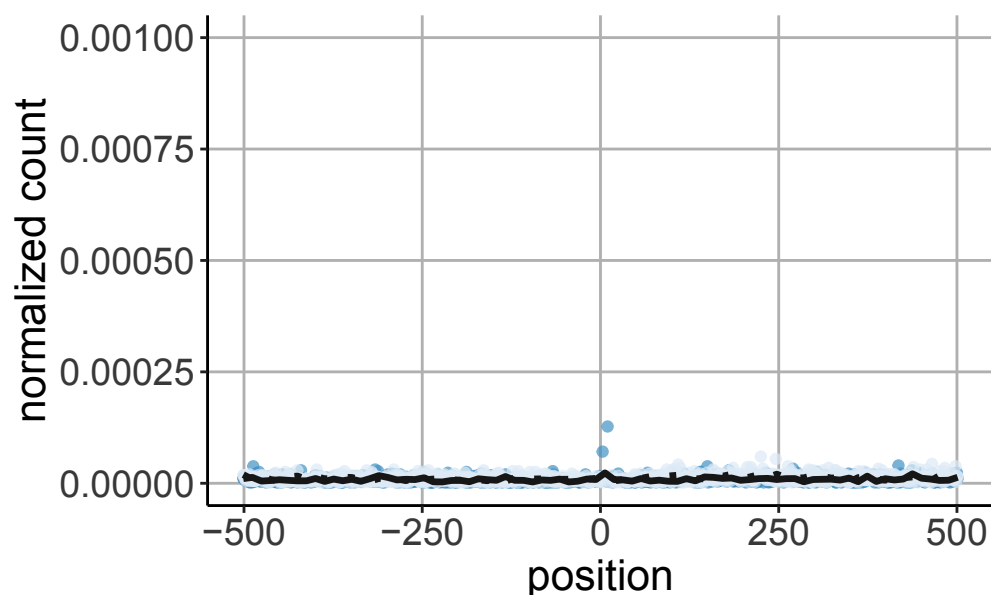

CELF3\_2-UGUGUNUGUGU

▪ antisense — sense    • antisense • sense

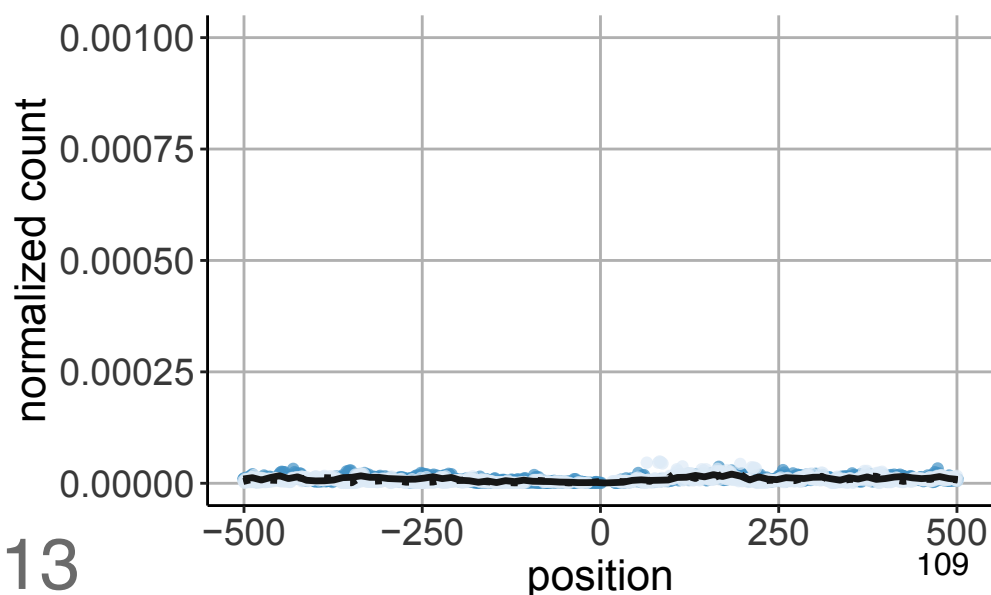

stop codon

RNPC3-GGGDDGGGDKUACKKGGK

• antisense — sense • antisense • sense

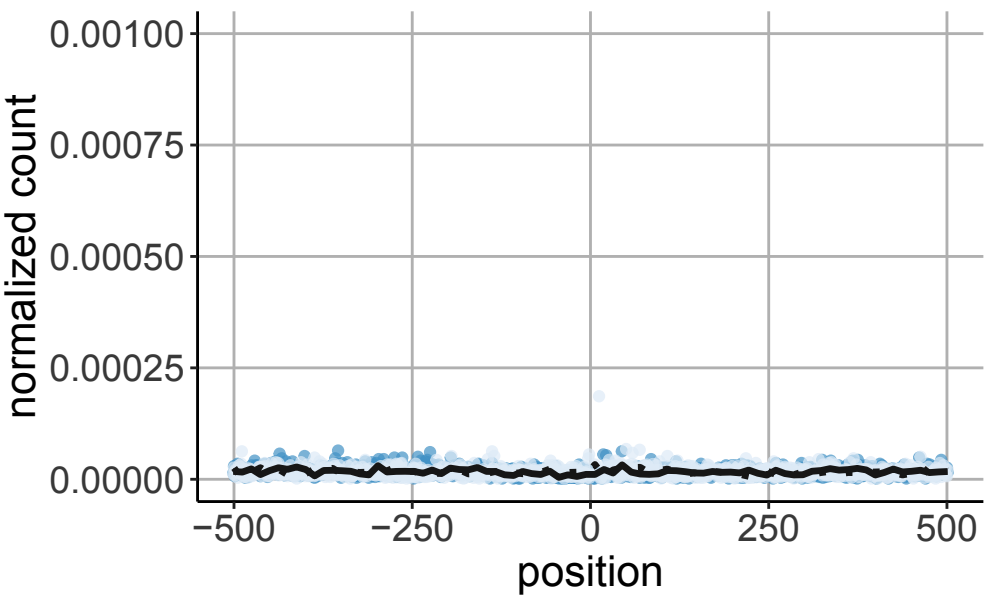

RBM14-UGCGUCG

• antisense — sense • antisense • sense

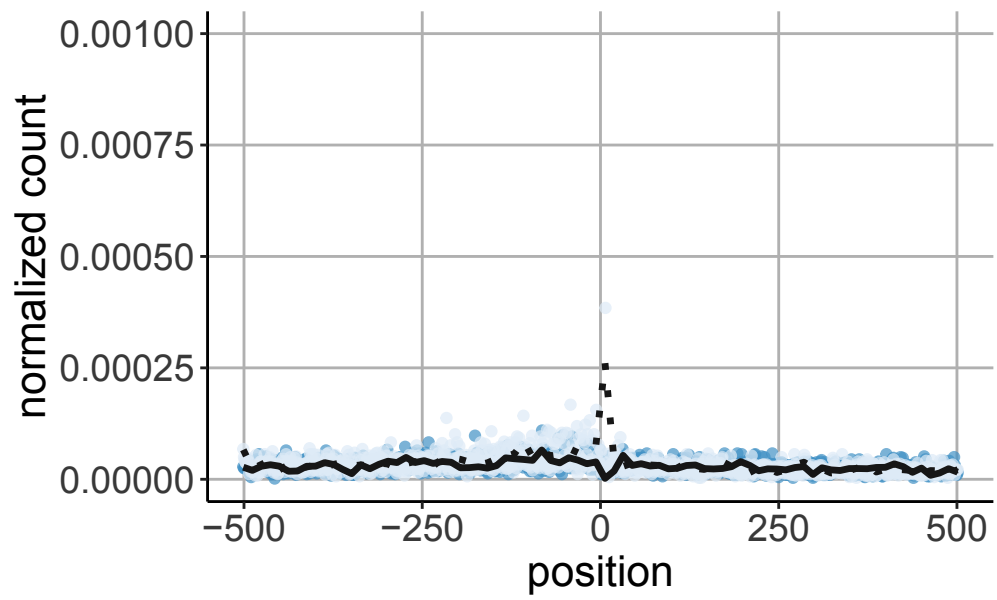

CELF4-UGUGUUGUGU

• antisense — sense • antisense • sense

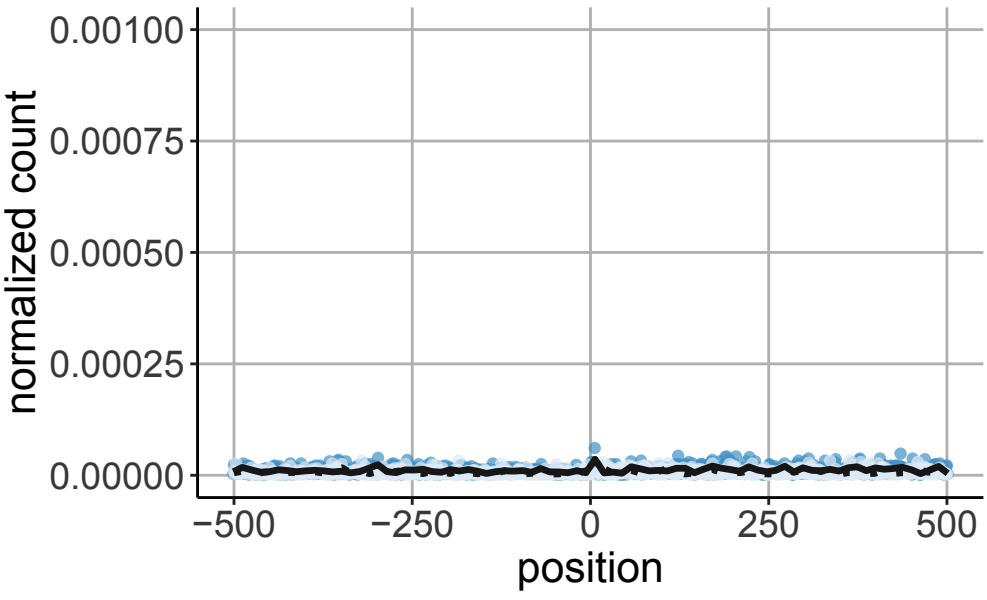

ZRANB2-NNGGUAAGGUNN

• antisense — sense • antisense • sense

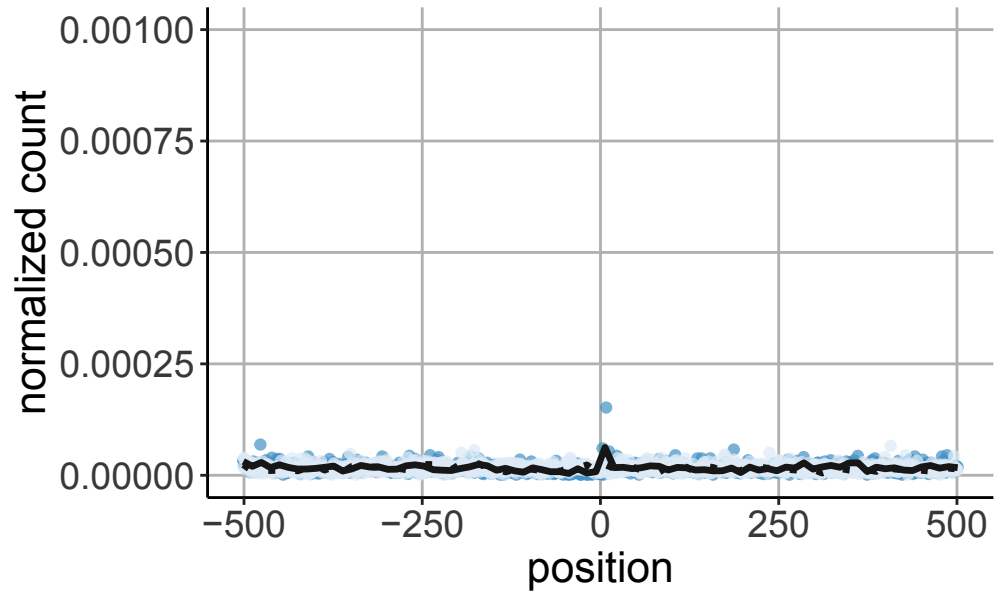

RBM4-CGGGGURUGN

• antisense — sense • antisense • sense

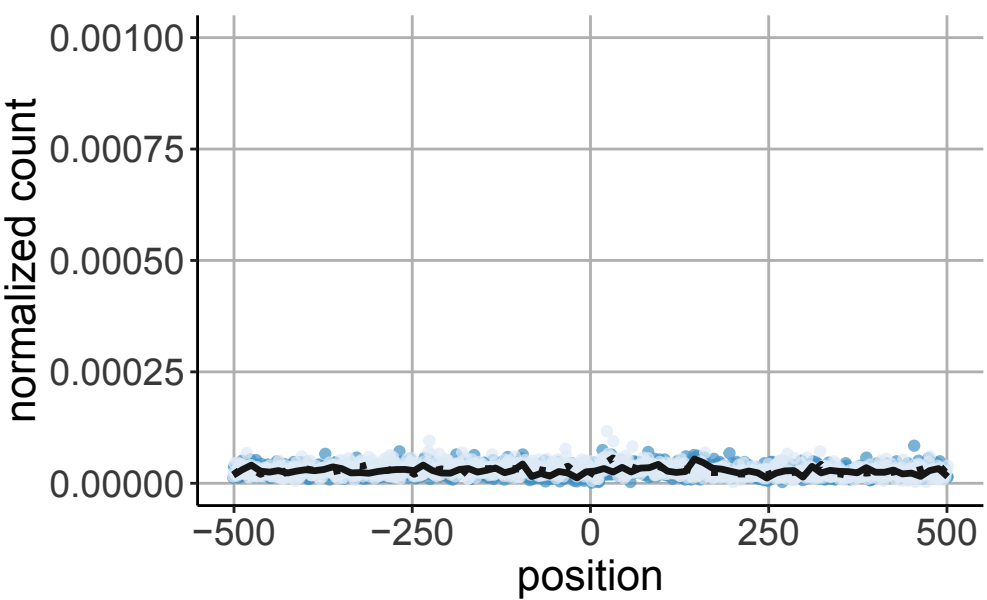

RBPMS-NAGGCACR

• antisense — sense • antisense • sense

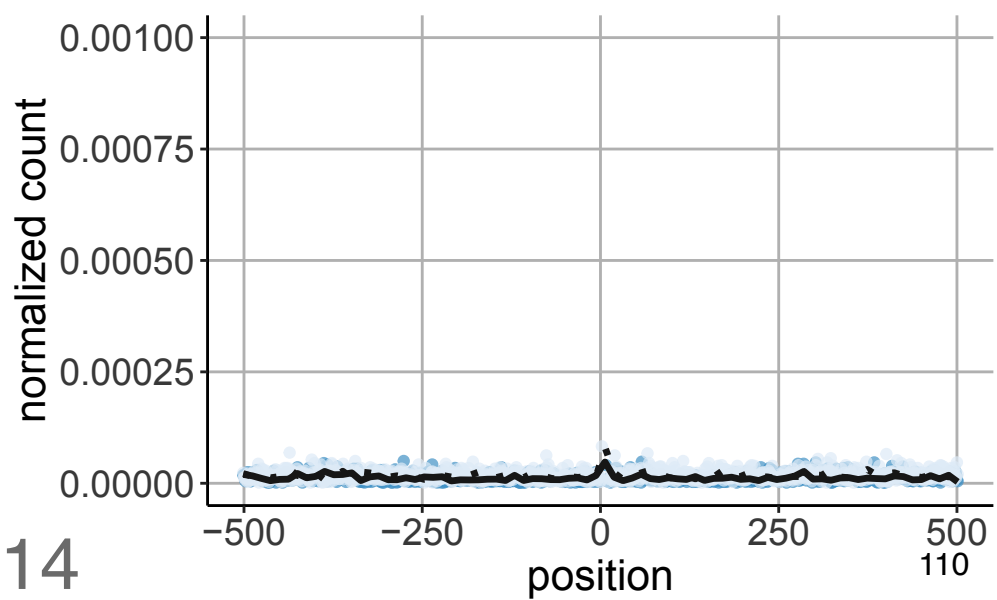

stop codon

RBPMS-UCACGNGCACN

• antisense — sense • antisense • sense

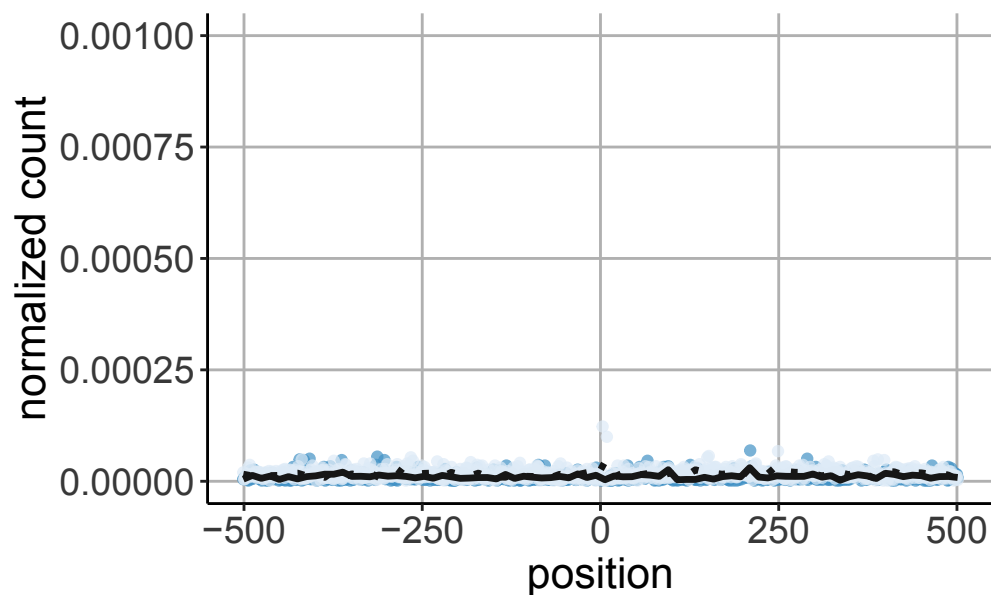

CELF1\_2-UGUGUNUGUGU

• antisense • sense

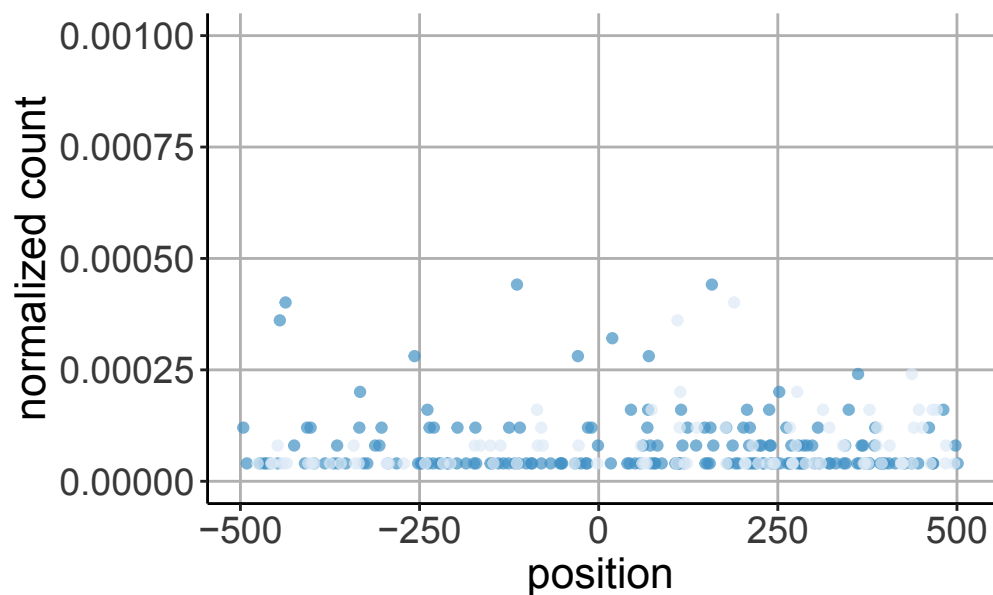

CSTF2-RRGGCGUAGCGUNN

• antisense — sense • antisense • sense

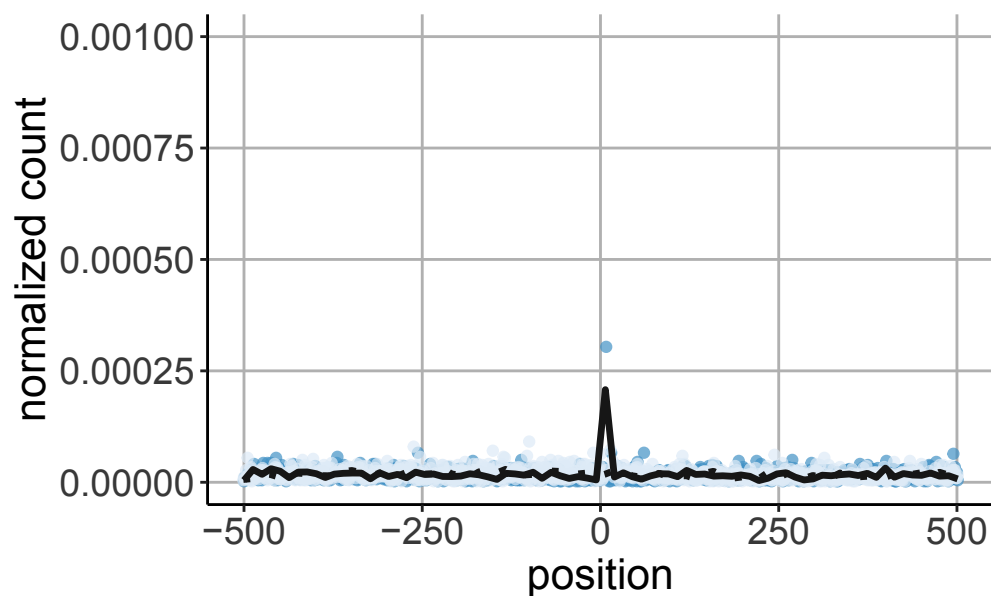

RBM28-GRGGCCGNGCGGUGG

• antisense — sense • antisense • sense

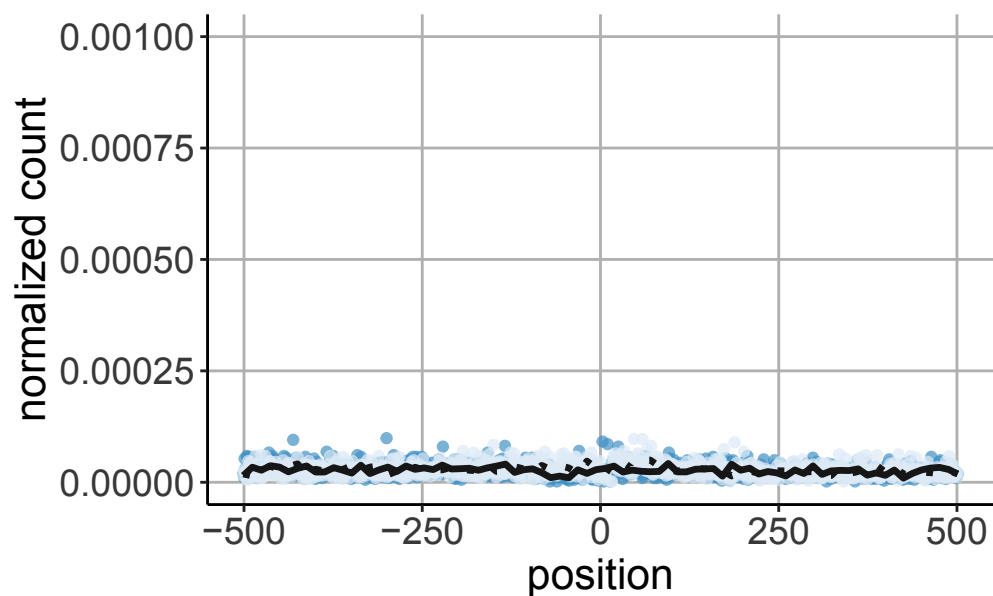

RBM28-GUGGGUCUCGG

• antisense — sense • antisense • sense

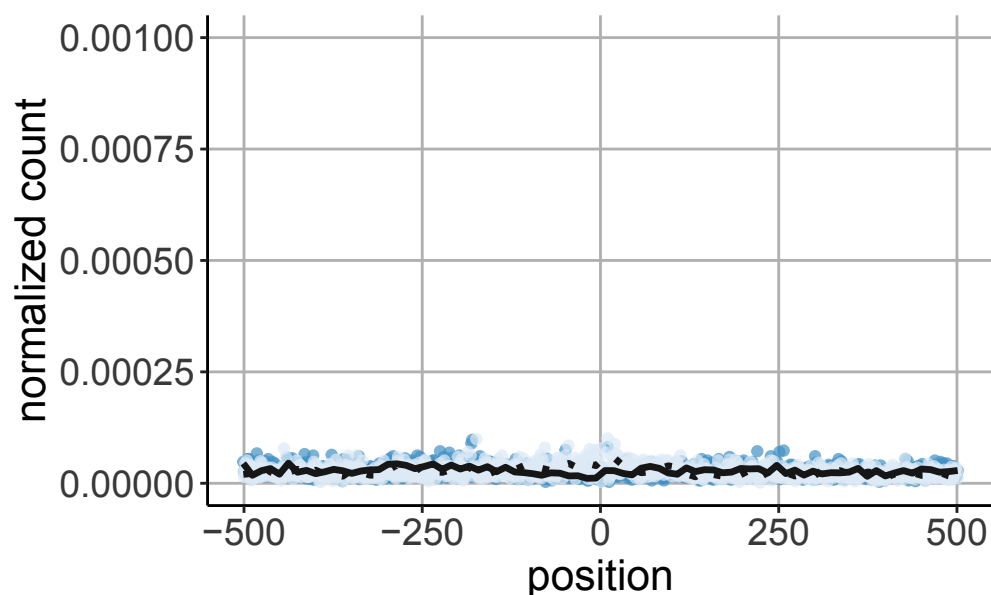

ZC3H10-GCGCAUGCGNN

• antisense — sense • antisense • sense

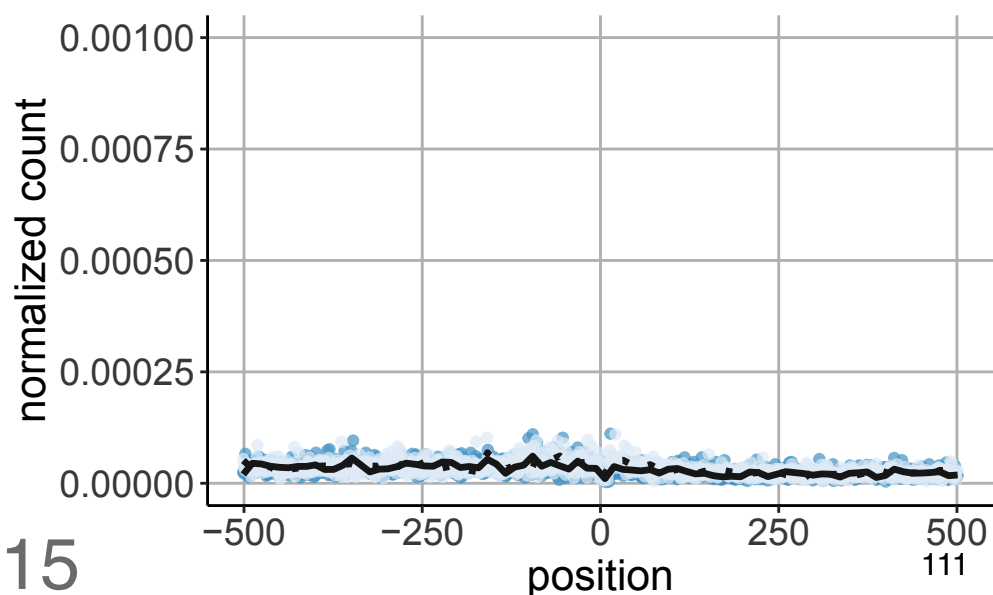



stop codon

ZC3H10-NGCGCAGCGUN

▪ antisense — sense    • antisense • sense

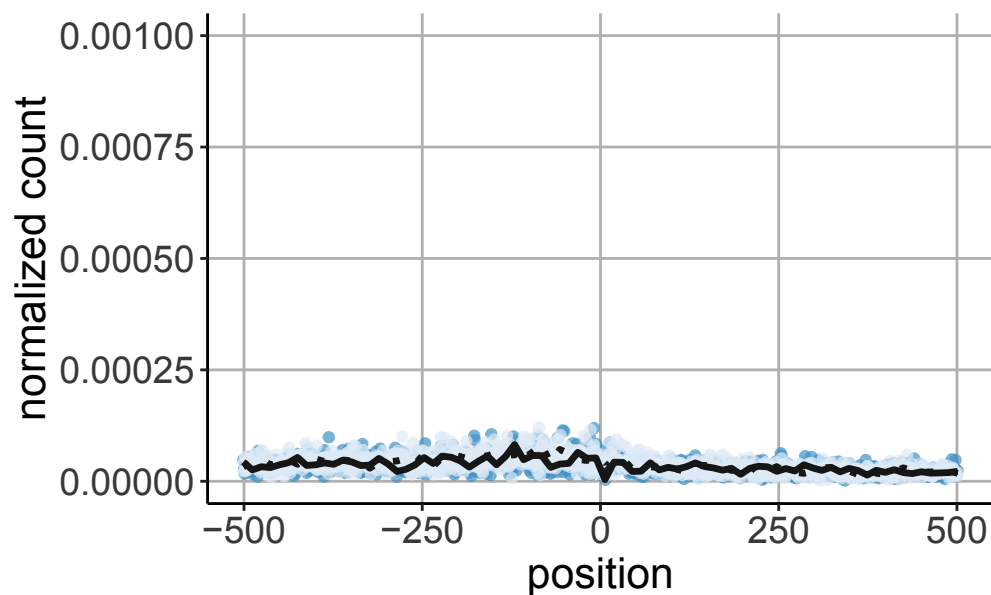

RBFOX1\_2-GCAUGNNGCAUG

▪ antisense — sense    • antisense • sense

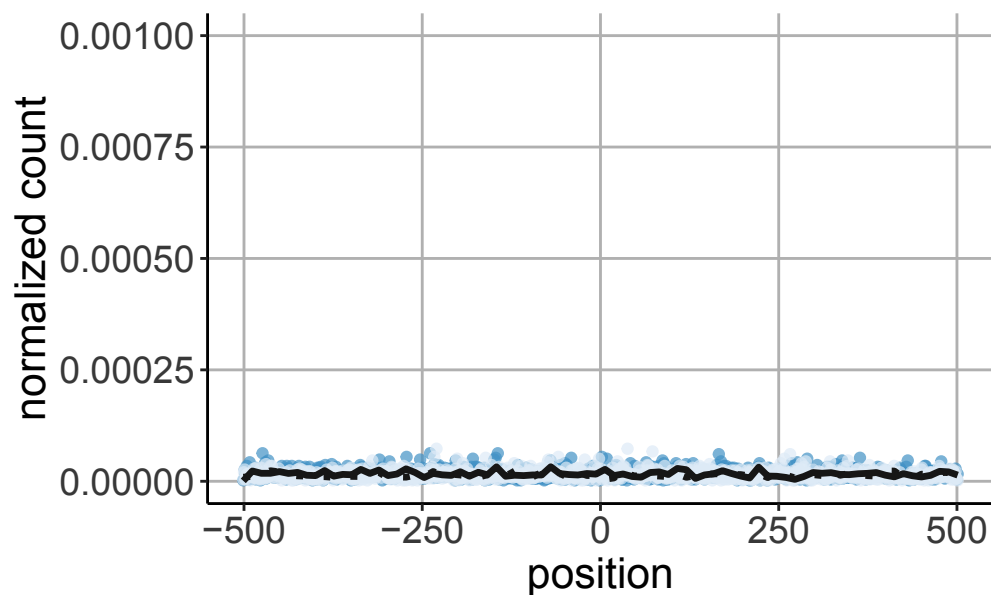

MSI1-KUAGUWKUAGK

▪ antisense — sense    • antisense • sense

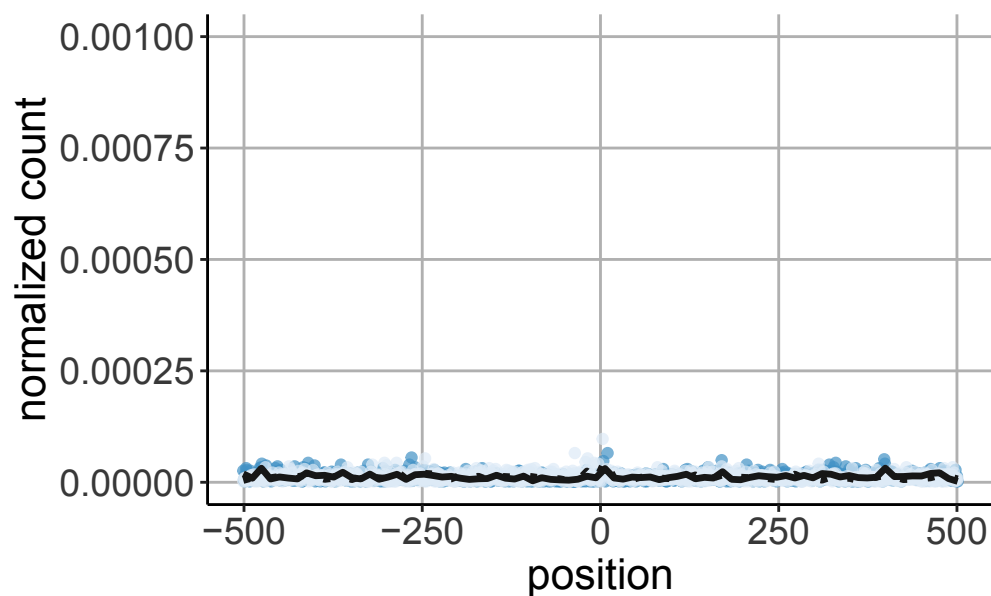

HEXIM1-GKDKCGACGGK

▪ antisense — sense    • antisense • sense

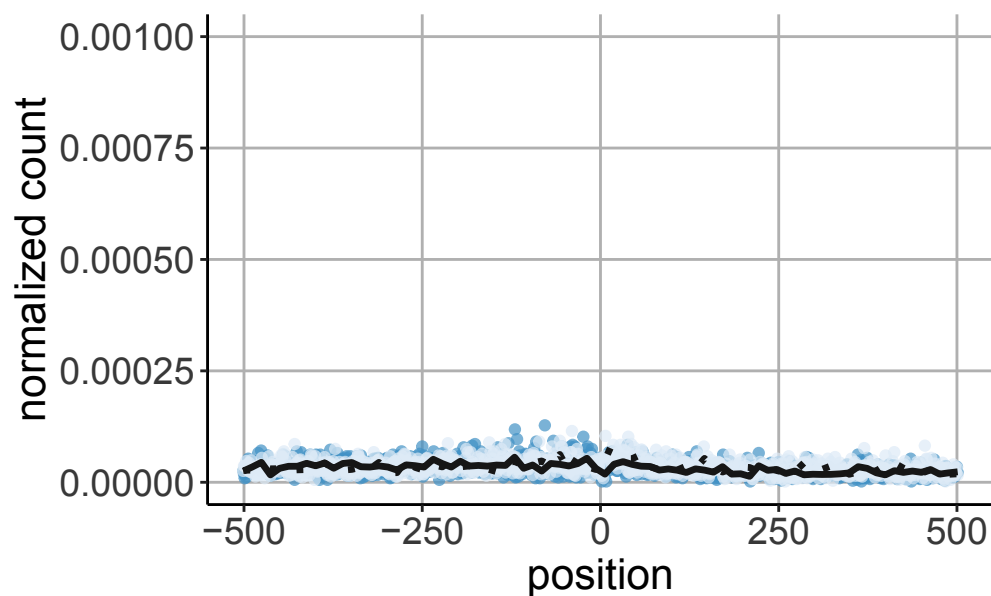

SART3-NGUUAGCRK

▪ antisense — sense    • antisense • sense

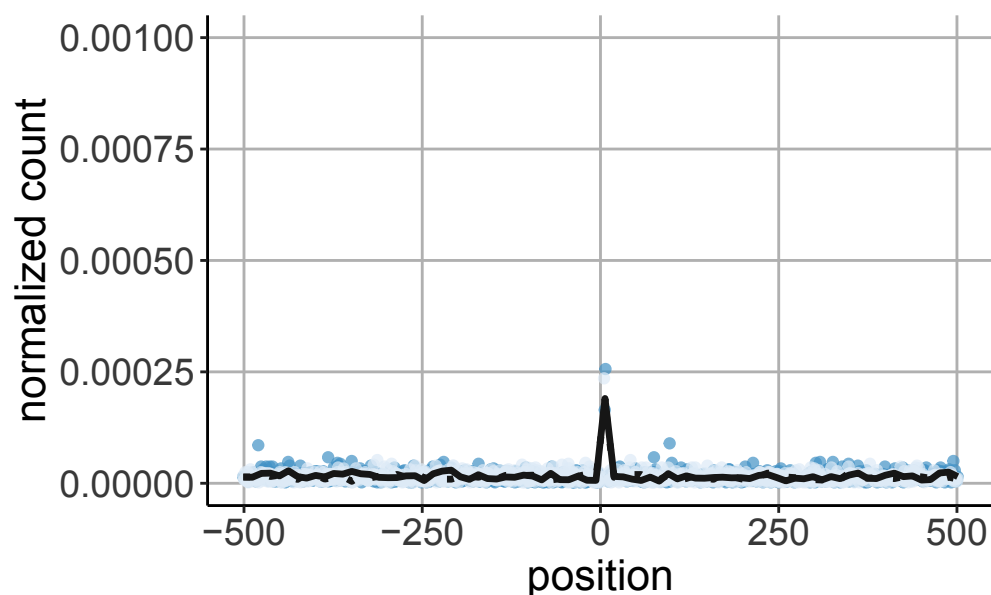

MSI2-GUAGUGDGUAGK

▪ antisense — sense    • antisense • sense

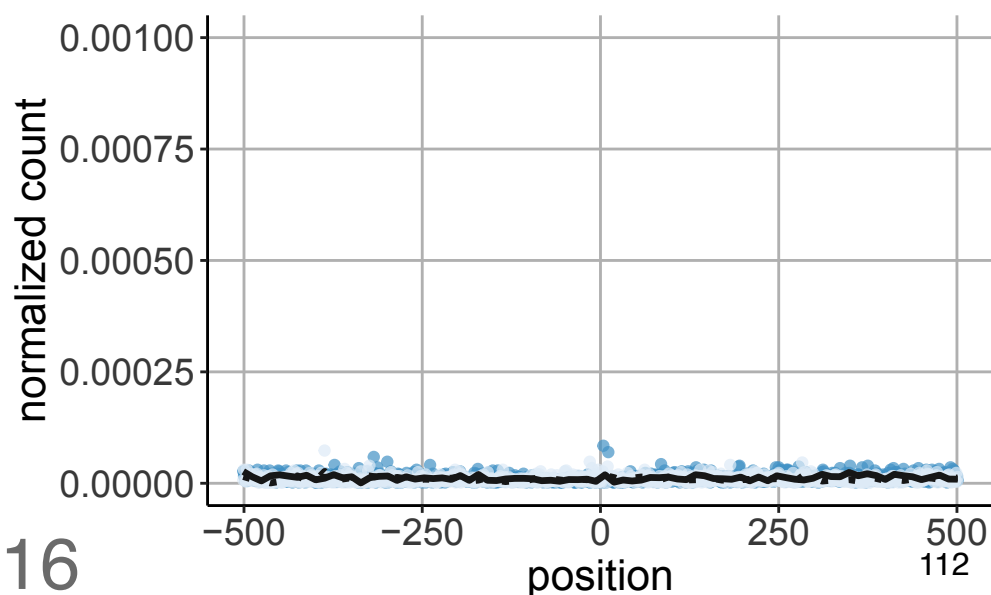

stop codon

MSI2-GUAGUNNNGUAGK

• antisense — sense • antisense • sense

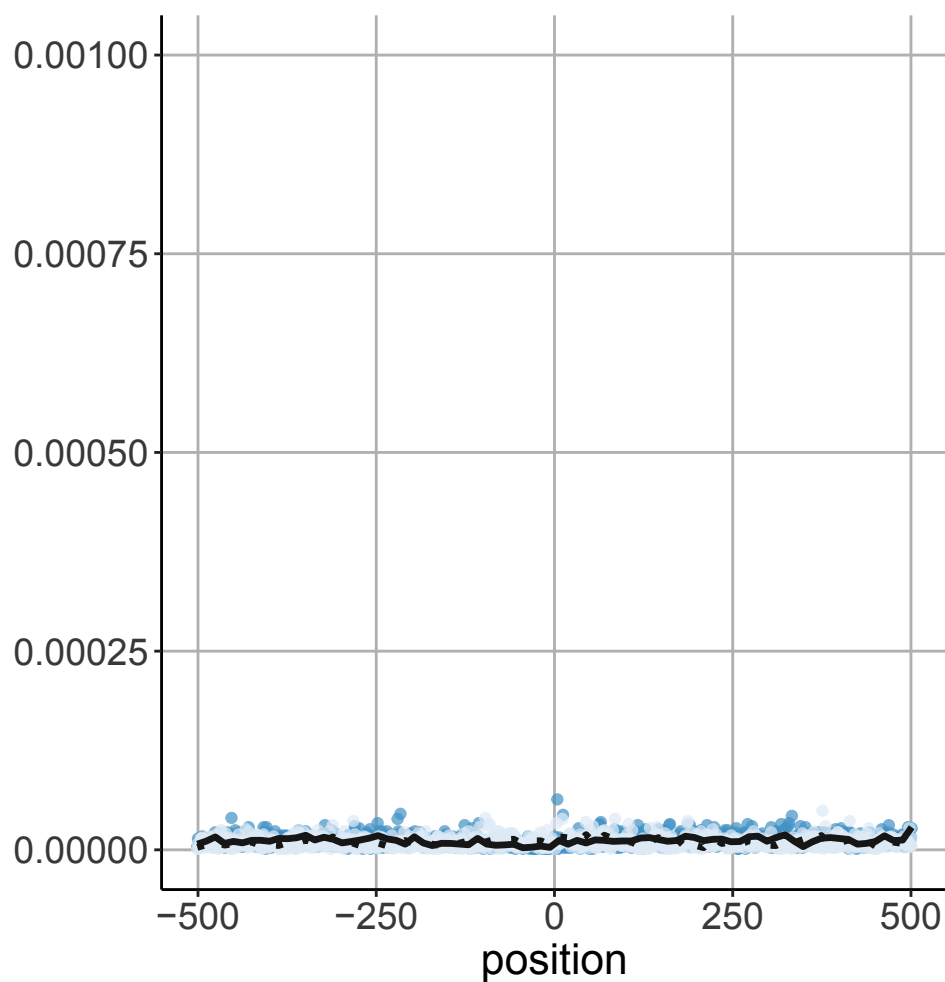

ZCRB1-GNNUUAAKK

• antisense — sense • antisense • sense

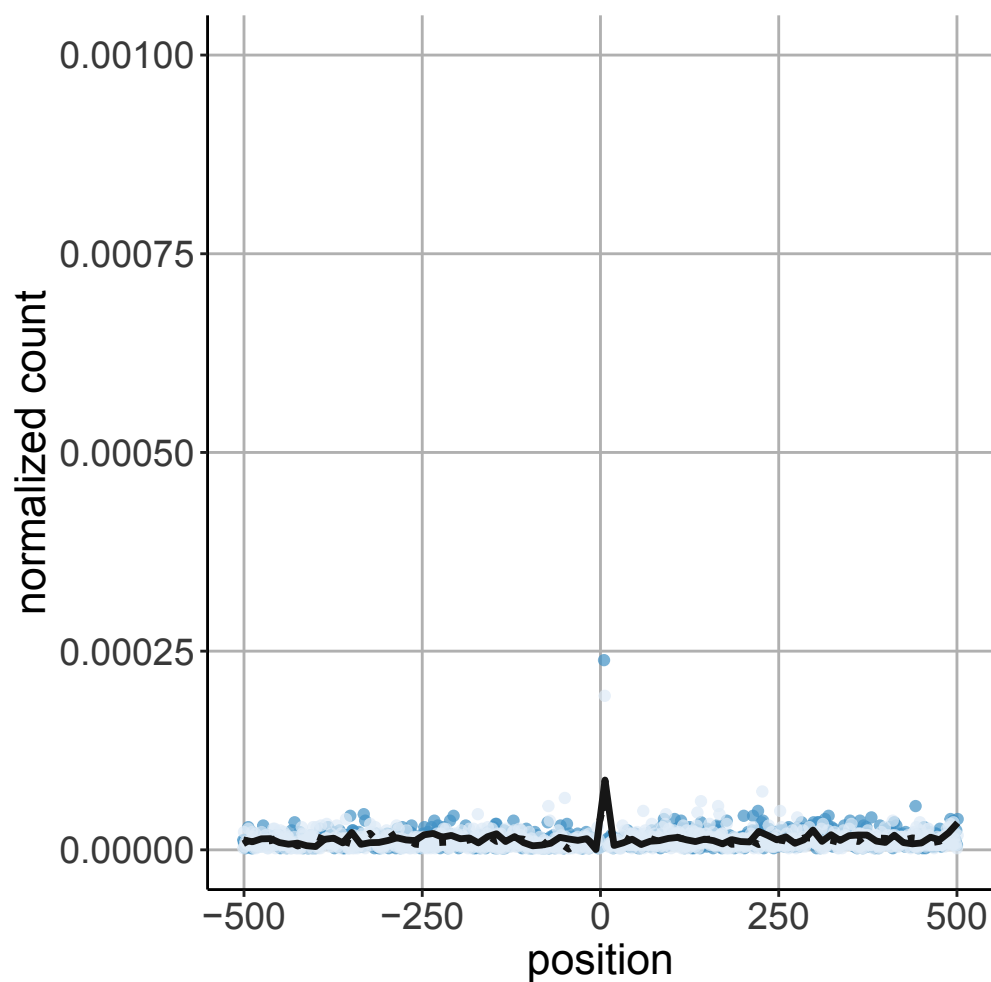

ZCRB1-GUGGACUUA

• antisense — sense • antisense • sense

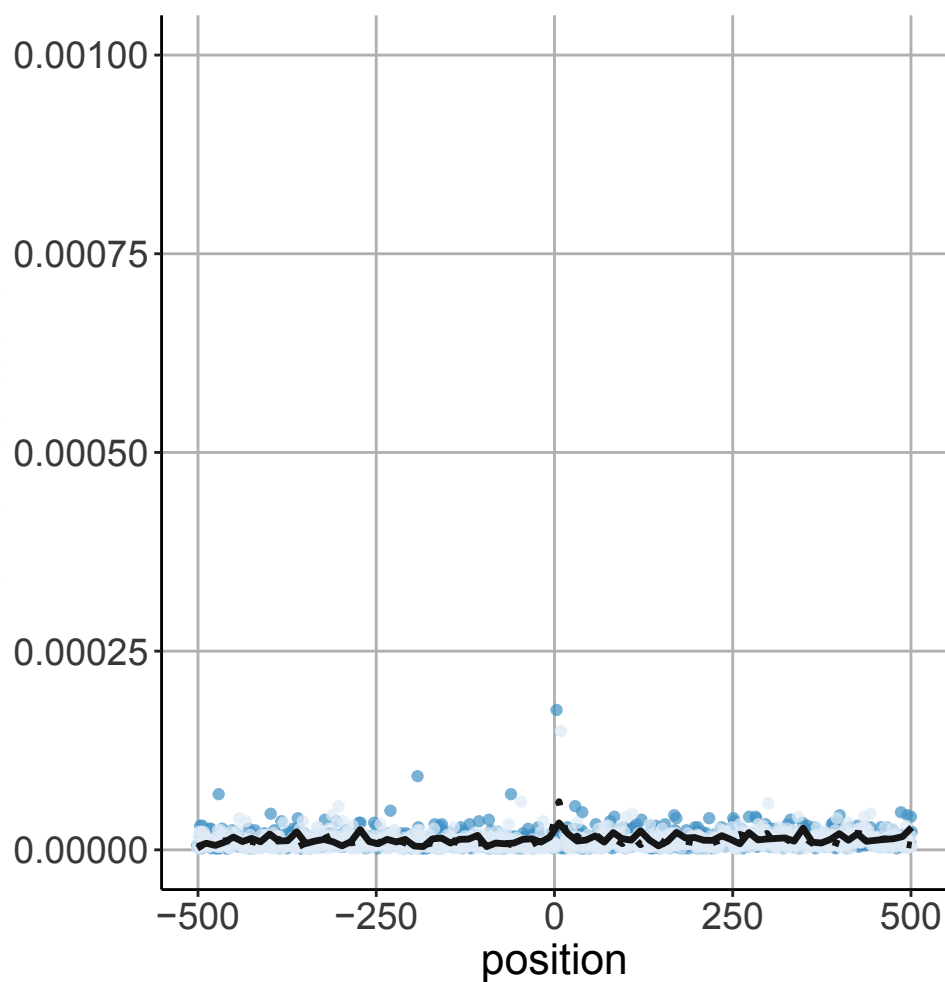

LARP6-GUGUCNNNNNNNNNGAAGUCN

• antisense — sense • antisense • sense

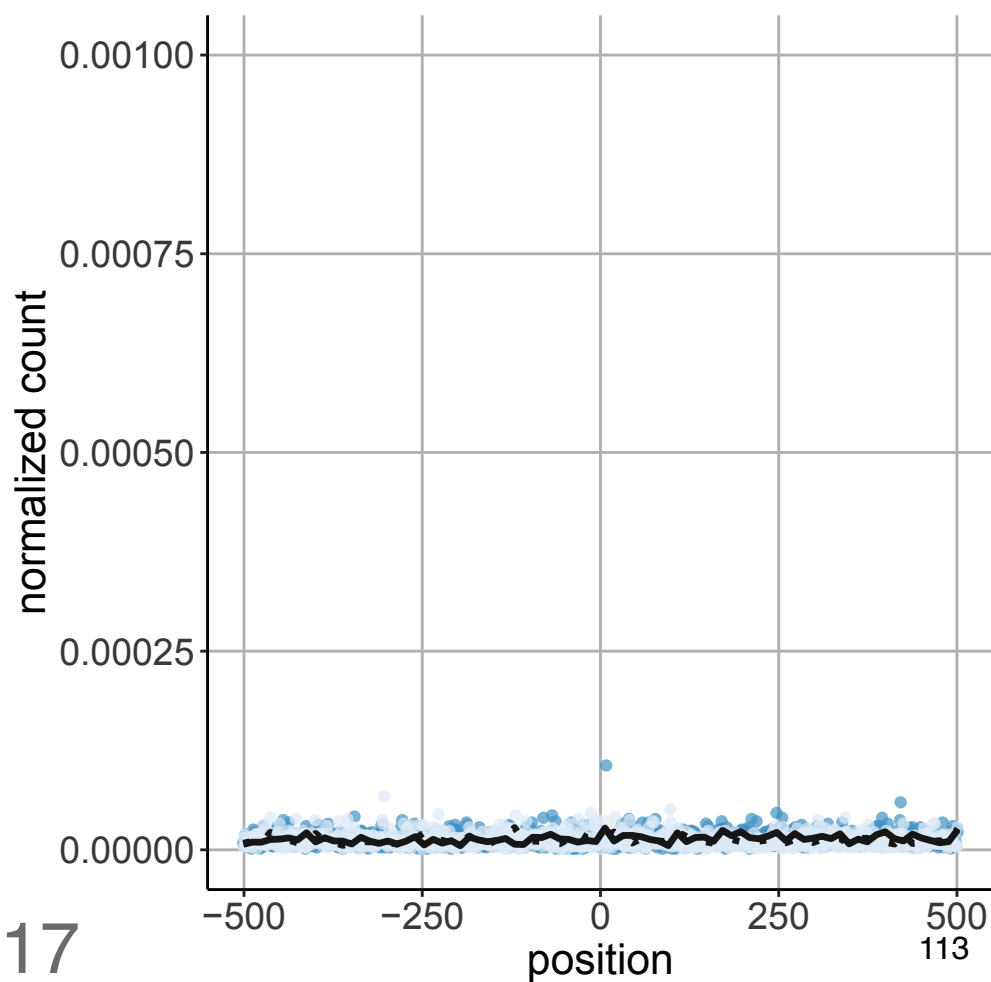

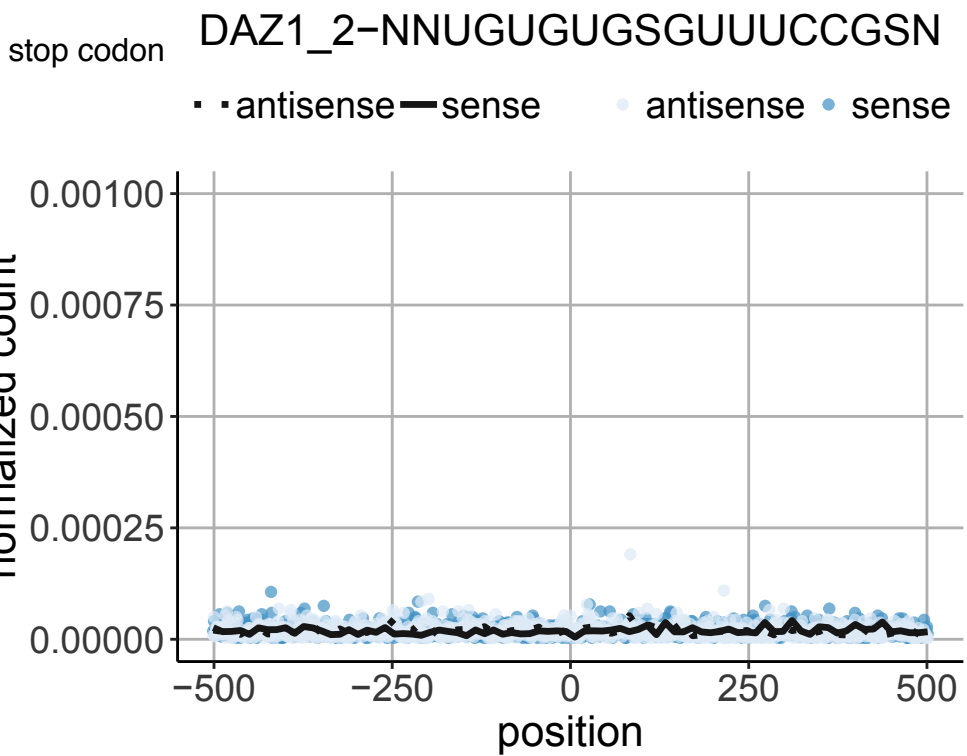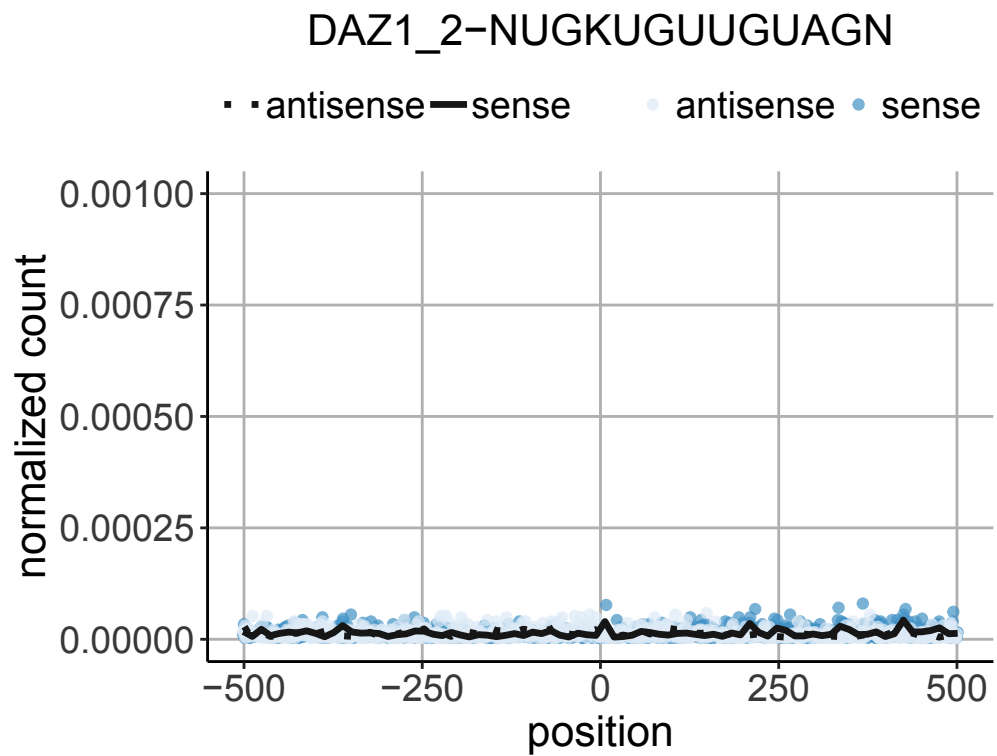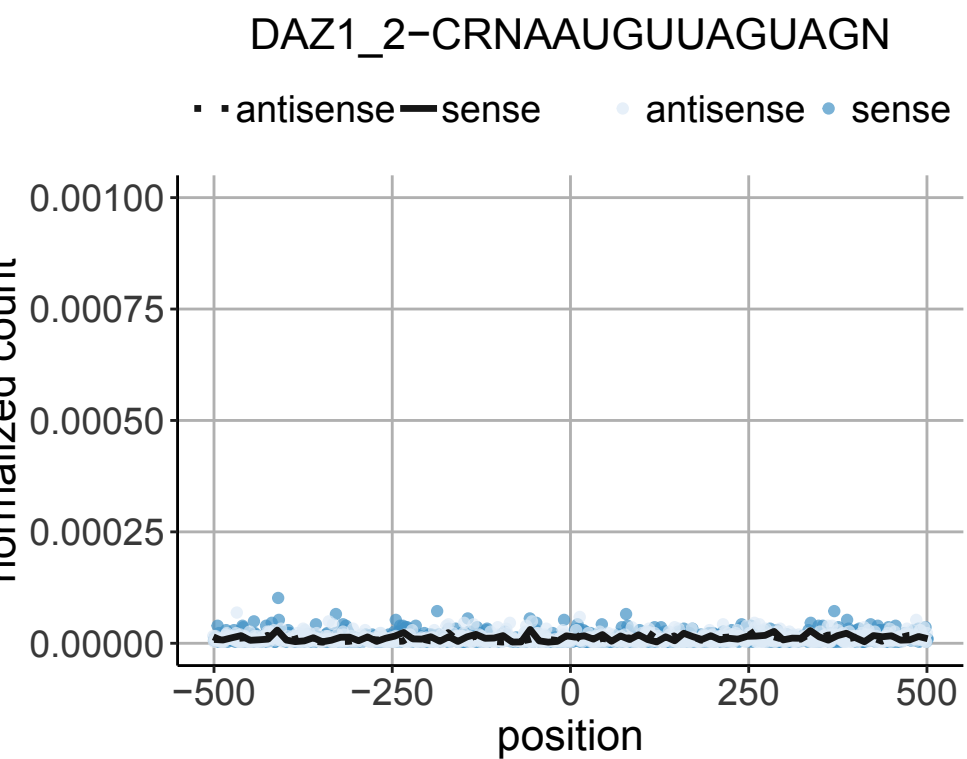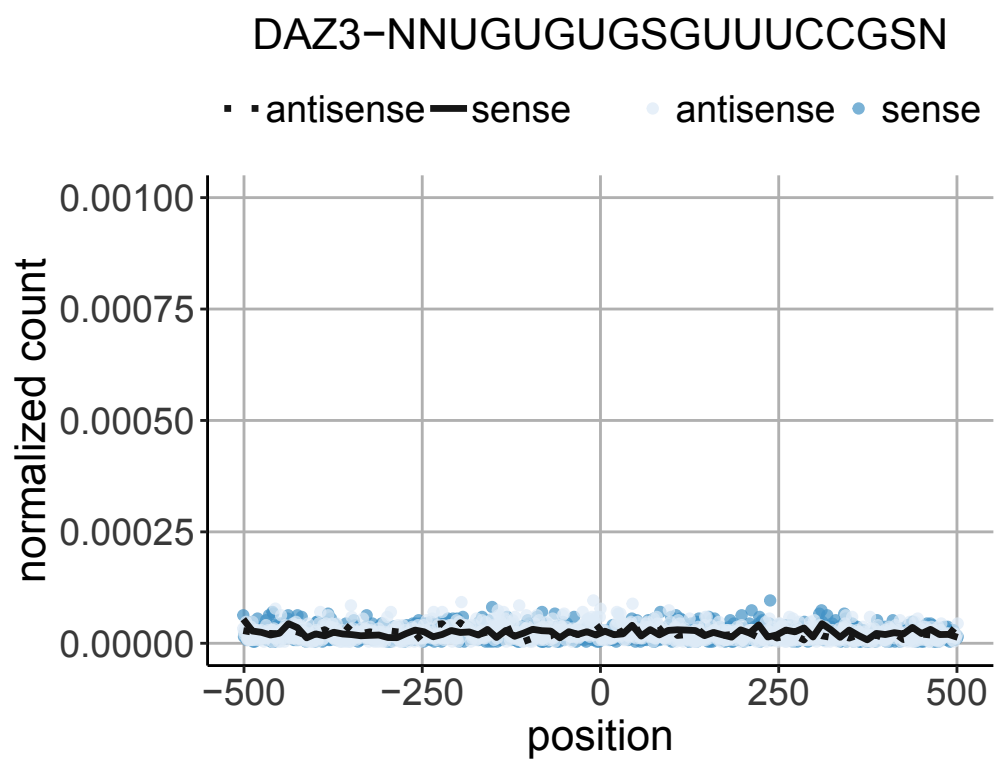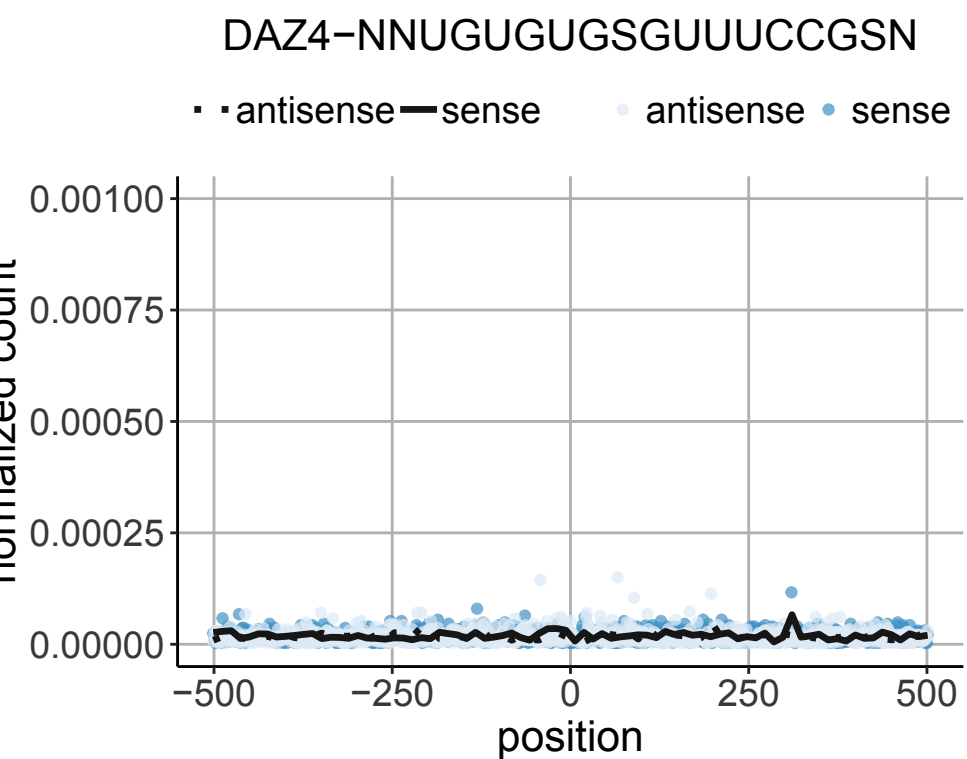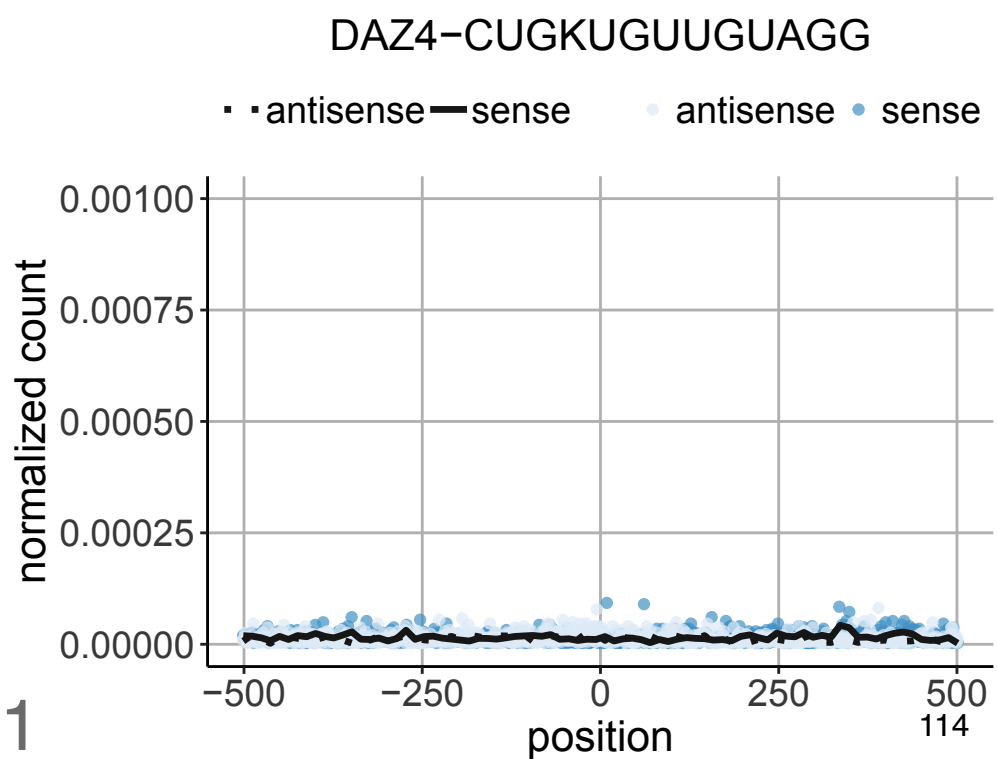

stop codon

DAZL-NNUGYGUGCGUUUCCGSN

• antisense — sense    • antisense • sense

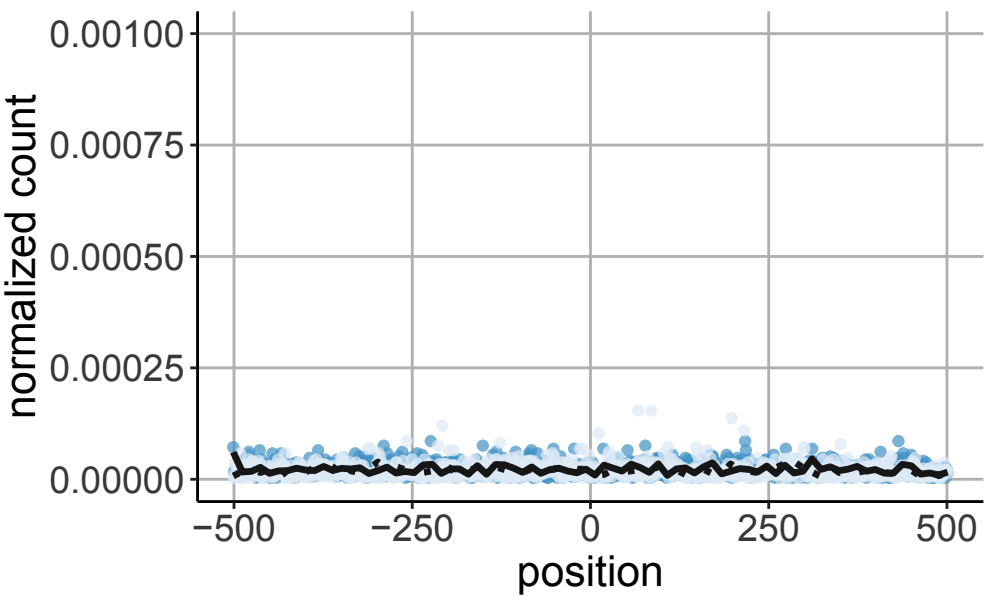

HNRNPA1-NGCAGUUUUAGGGCN

• antisense — sense    • antisense • sense

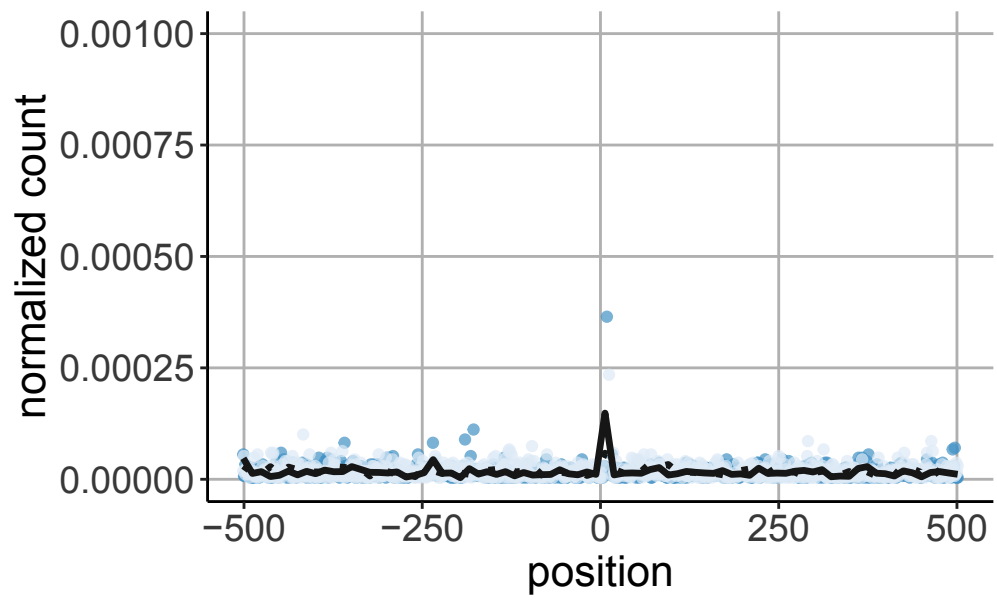

HNRNPC-NGGGUCUNAUUUUUUAAN

• antisense — sense    • antisense • sense

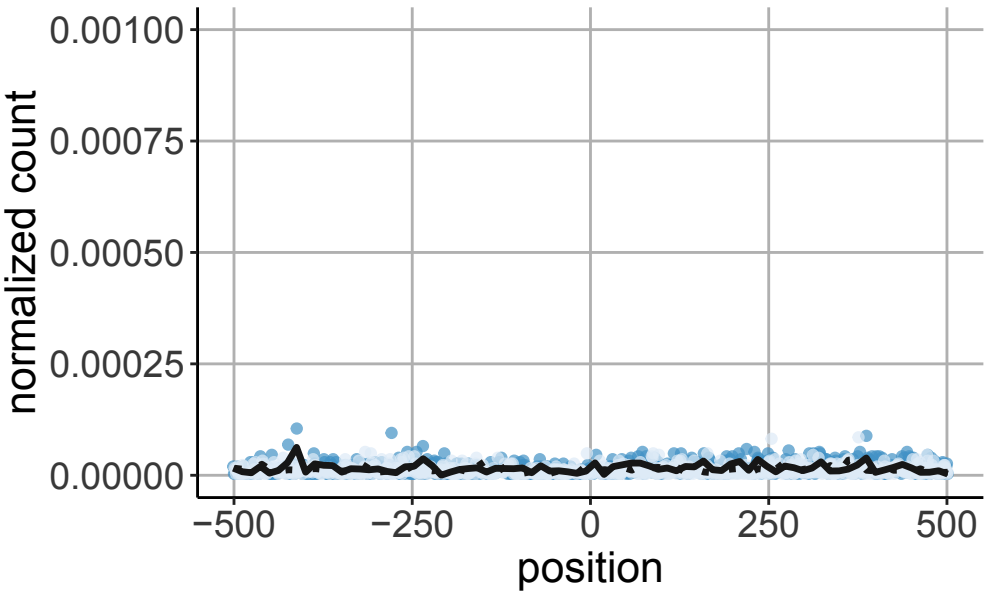

HNRNPCL1-NGGGUCUNAUUUUUUAAN

• antisense — sense    • antisense • sense

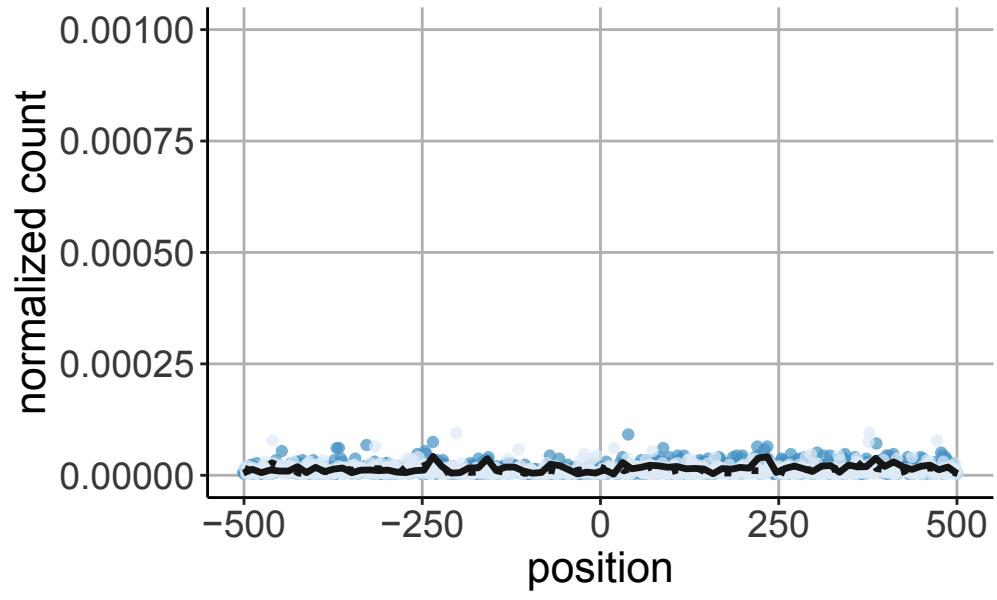

MKRN1-NYGUAAAKUGUAGN

• antisense — sense    • antisense • sense

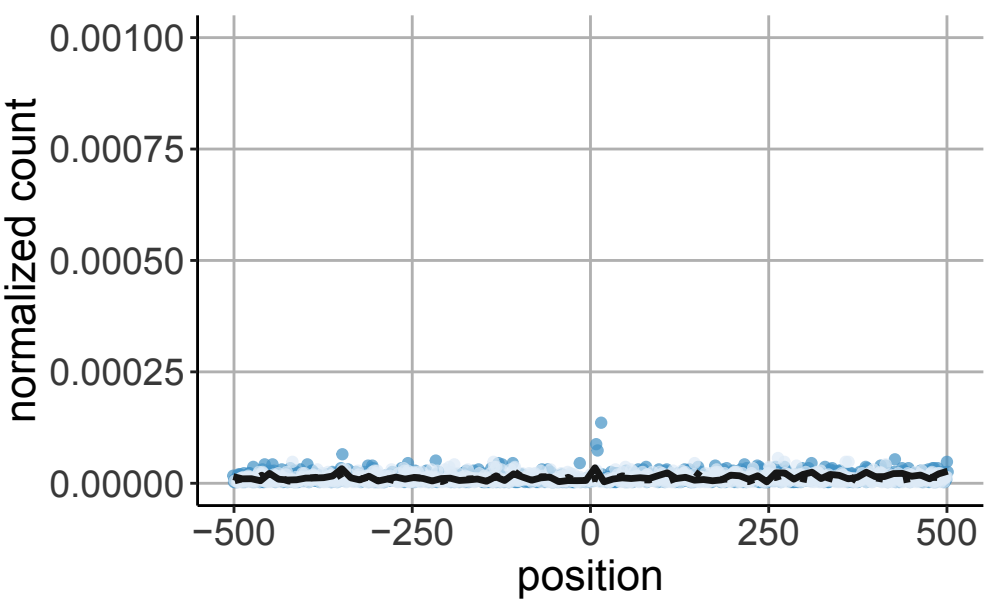

RALY-GGGUCUWUUUUUUA

• antisense — sense    • antisense • sense

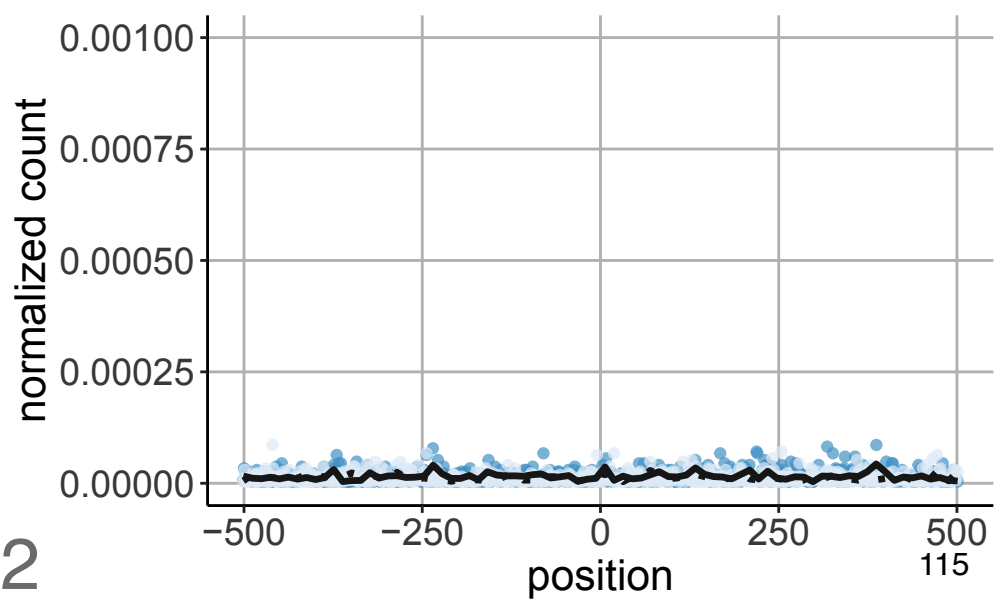

stop codon

### RBFOX1\_4-GKUGCAUGUG

• antisense — sense    • antisense • sense

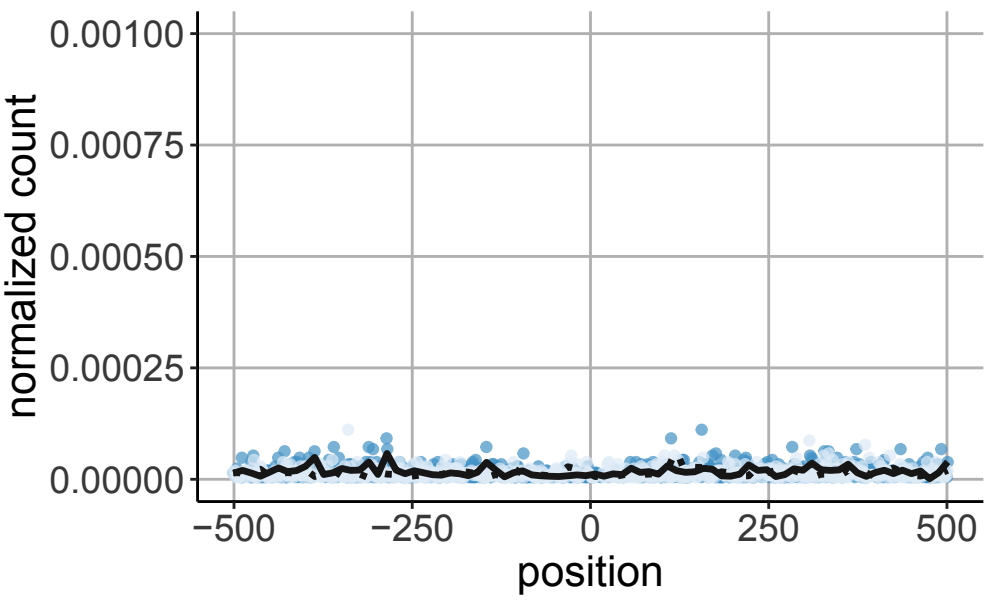

### RBFOX3-GUWGCAUGUG

• antisense — sense    • antisense • sense

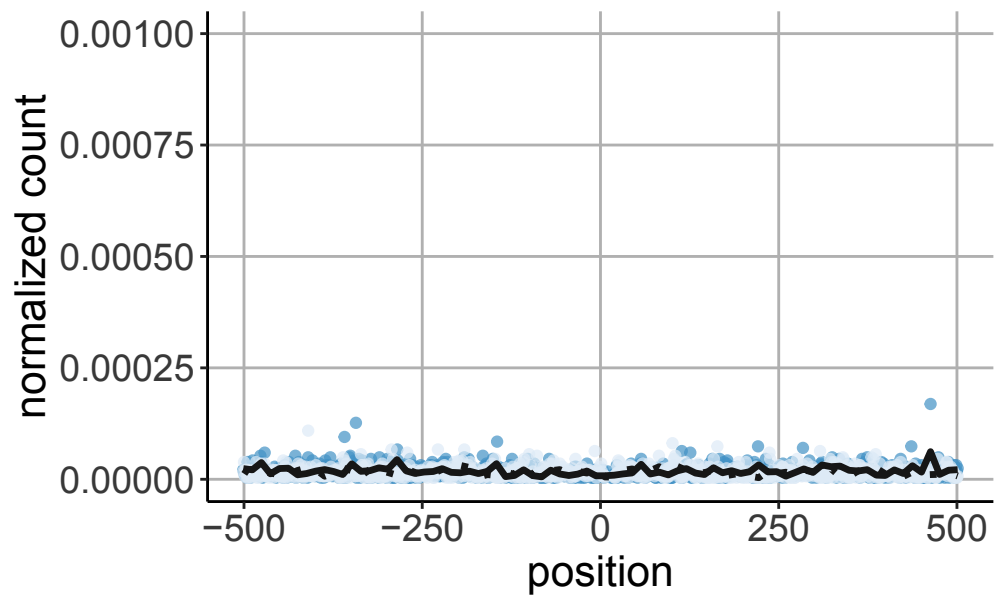

### RBM4-KGUUGCGCGGG

• antisense — sense    • antisense • sense

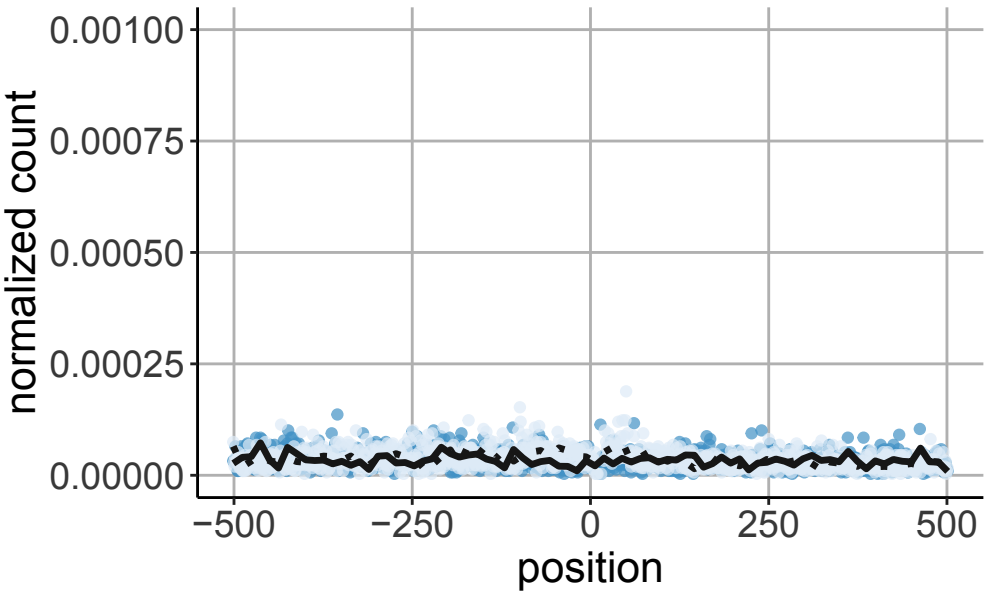

### RBM4-UGAGUGCGGUAG

• antisense — sense    • antisense • sense

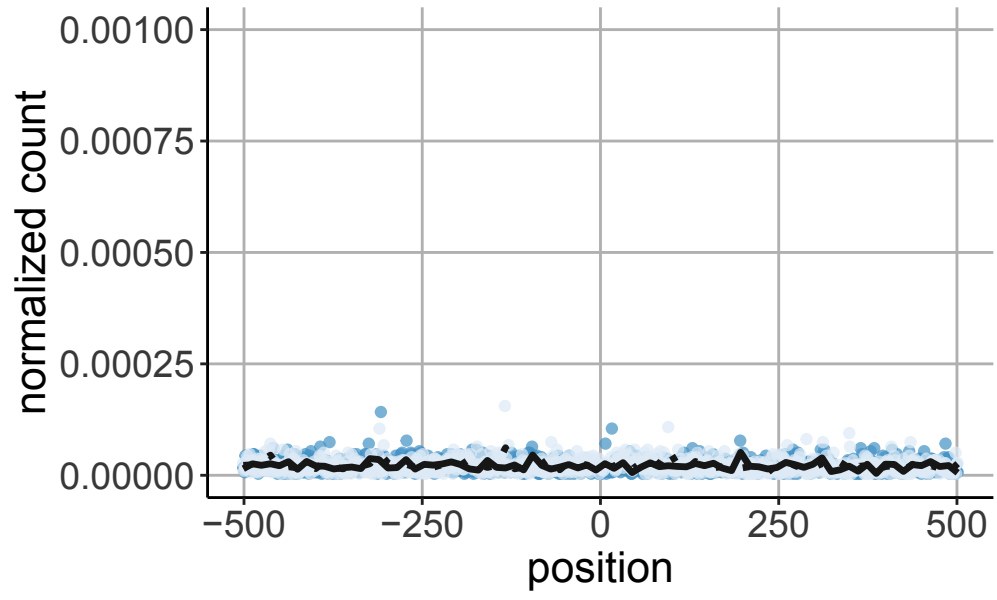

### RBM4B-KGUUGCGCGGG

• antisense — sense    • antisense • sense

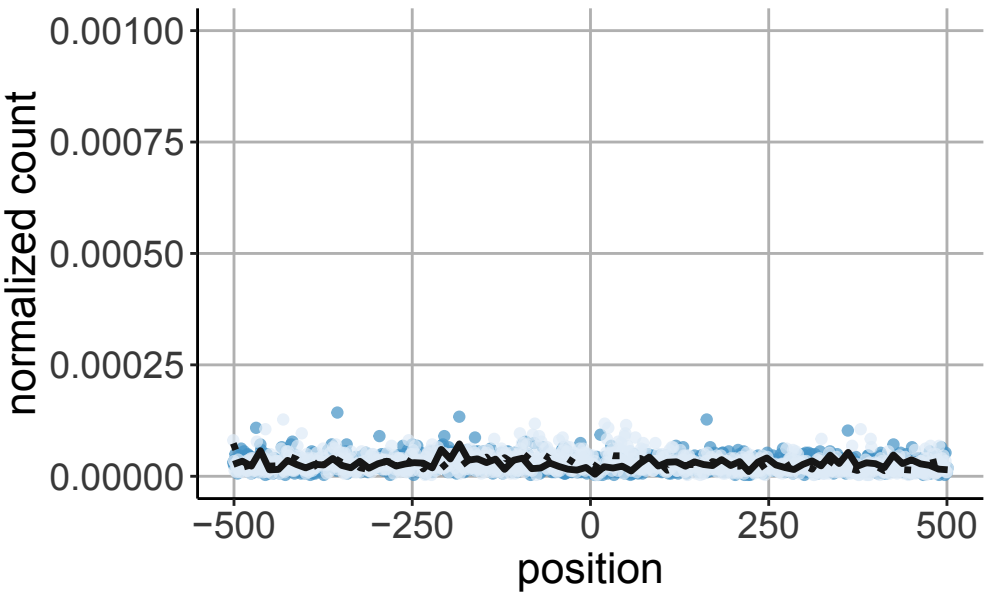

### RBM4B-UGAGUGCGGUAG

• antisense — sense    • antisense • sense

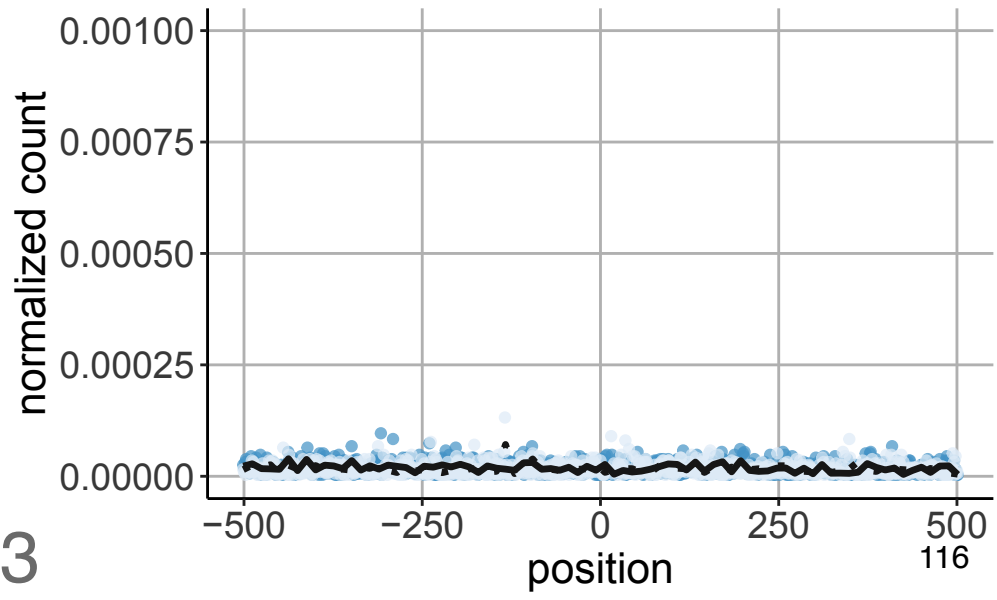

stop codon

### RBM6-YRCGCUCCUNGCY

▪ antisense — sense    • antisense • sense

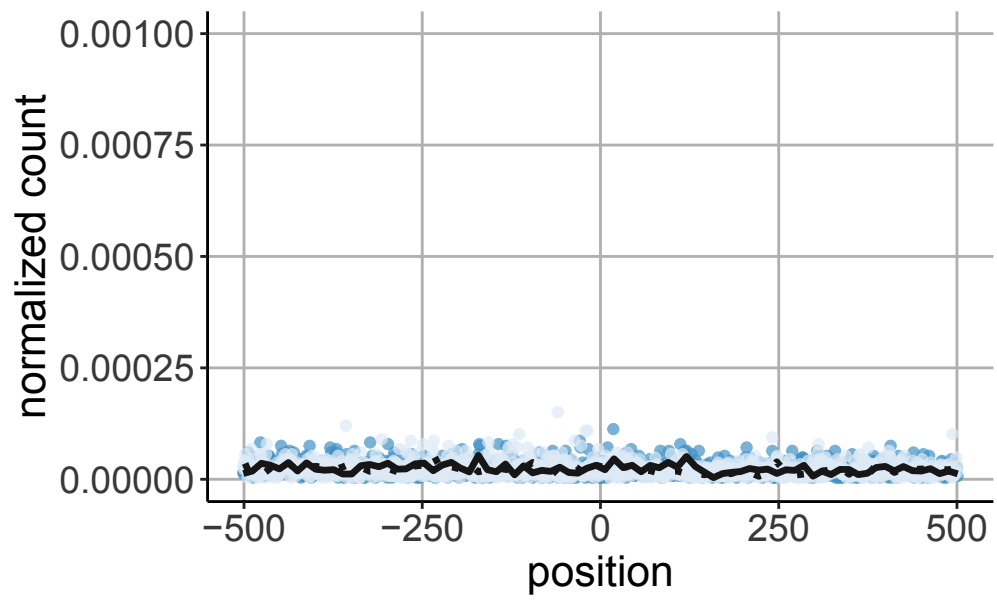

### RBM6-YRYGCUCGUGGCYN

▪ antisense — sense    • antisense • sense

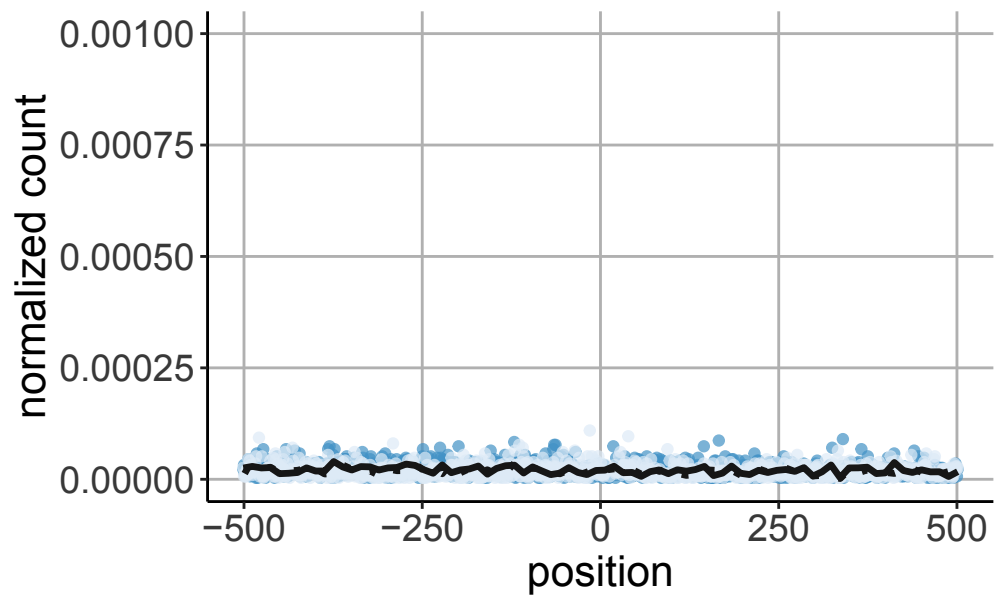

### RBMS1-SGUGCAUAAKGCN

▪ antisense — sense    • antisense • sense

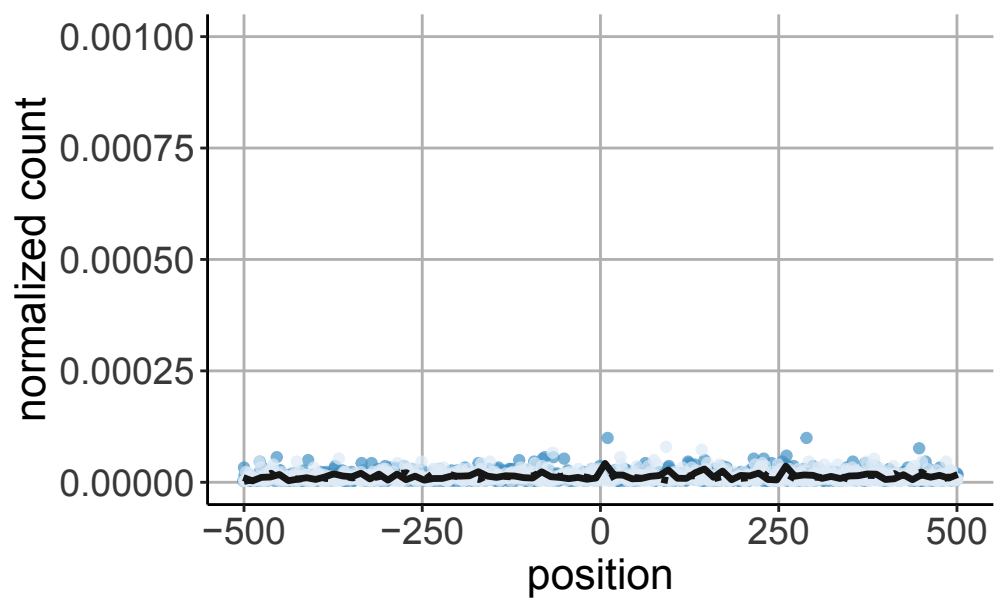

### RBMS2-NUGCAUAAUGN

▪ antisense — sense    • antisense • sense

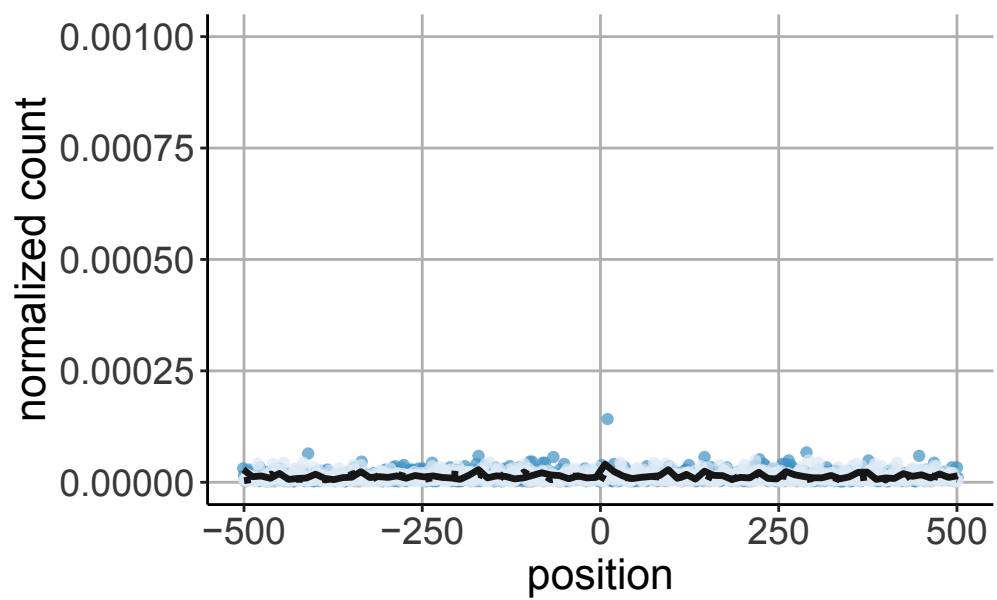

### RBMS3-NUGCAUAAUGN

▪ antisense — sense    • antisense • sense

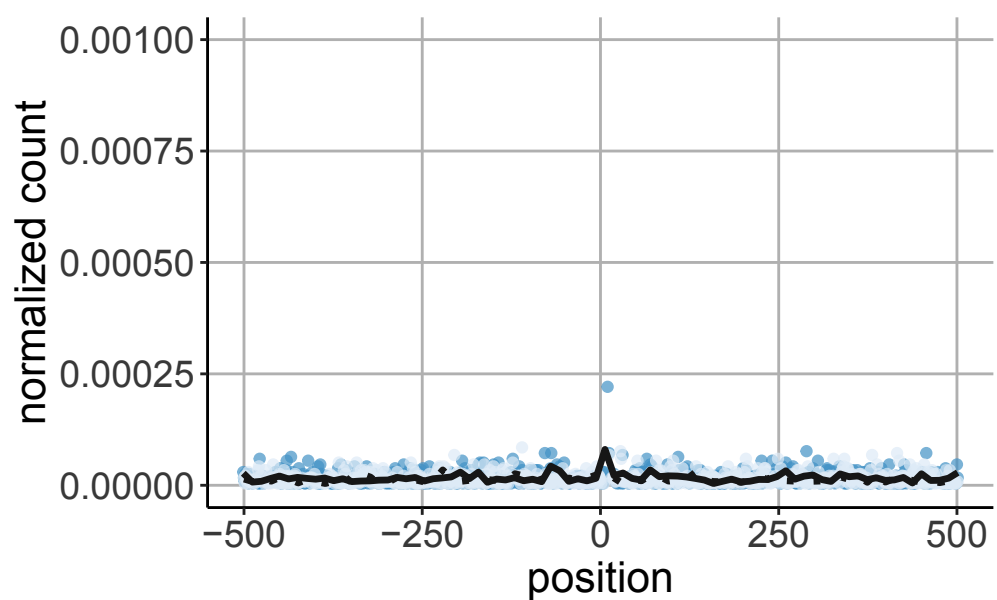

### RBMS3-SAUGYAURAKKUG

▪ antisense — sense    • antisense • sense

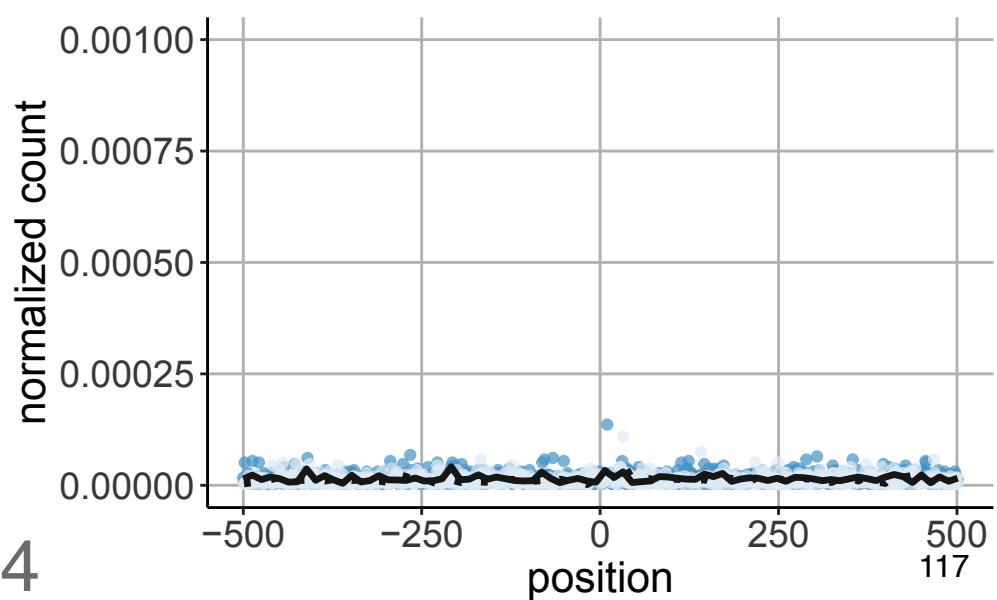

stop codon

RBMY1E-NGCUUCGNGCN

▪ antisense — sense    • antisense • sense

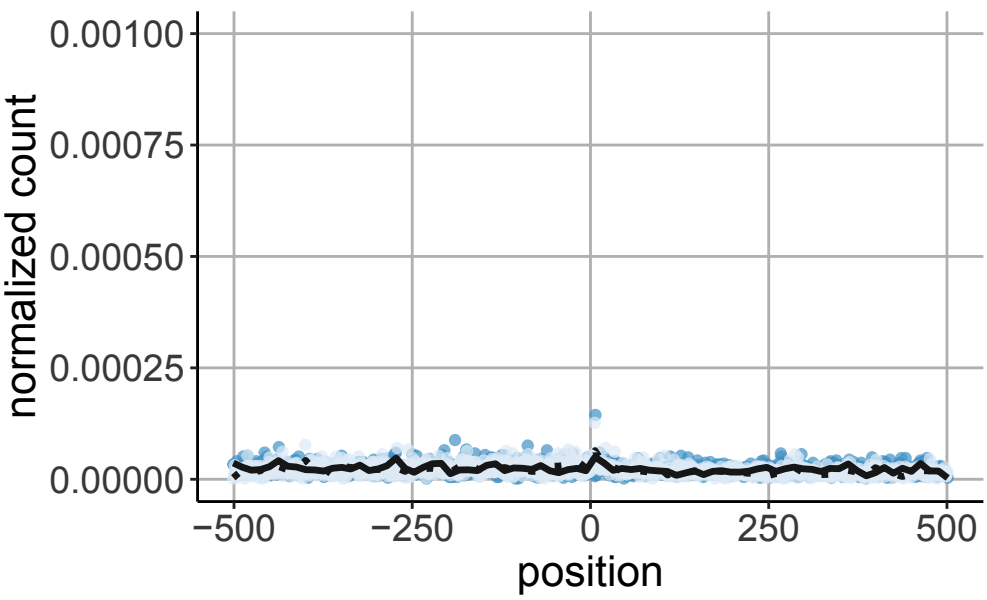

RBMY1E-NAGCUUNGUGCUN

▪ antisense — sense    • antisense • sense

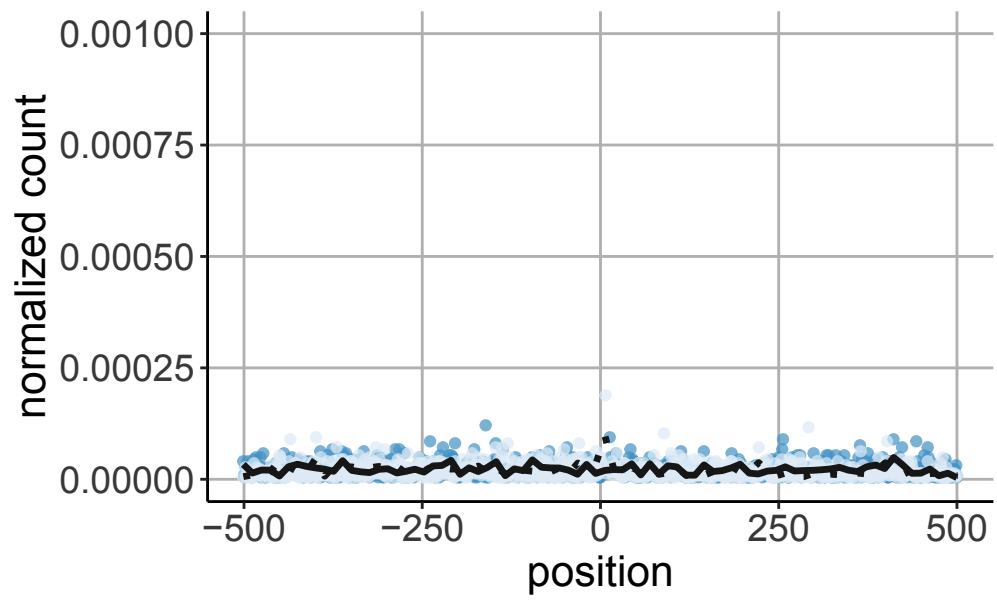

RBMY1F-NGCCCUCAAGGYN

▪ antisense — sense    • antisense • sense

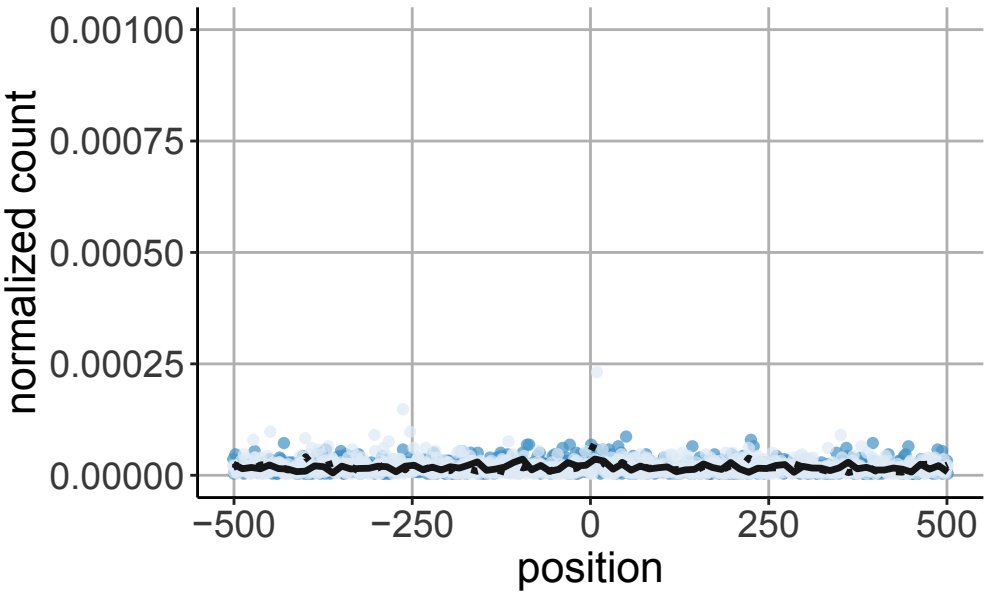

RBMY1F-GCGCAAGAGC

▪ antisense — sense    • antisense • sense

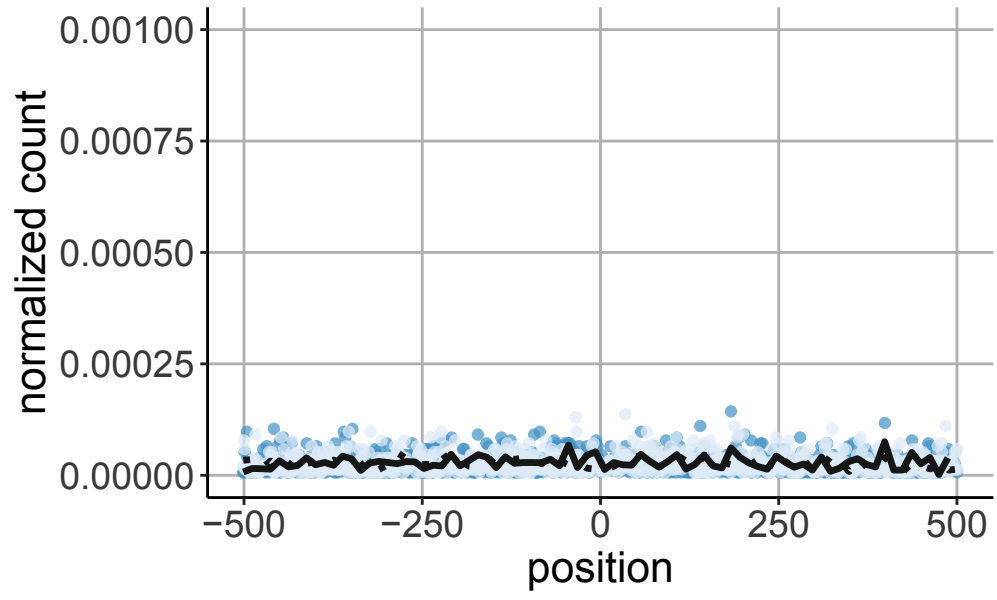

RBMY1J-NGCCCUCAAGGYN

▪ antisense — sense    • antisense • sense

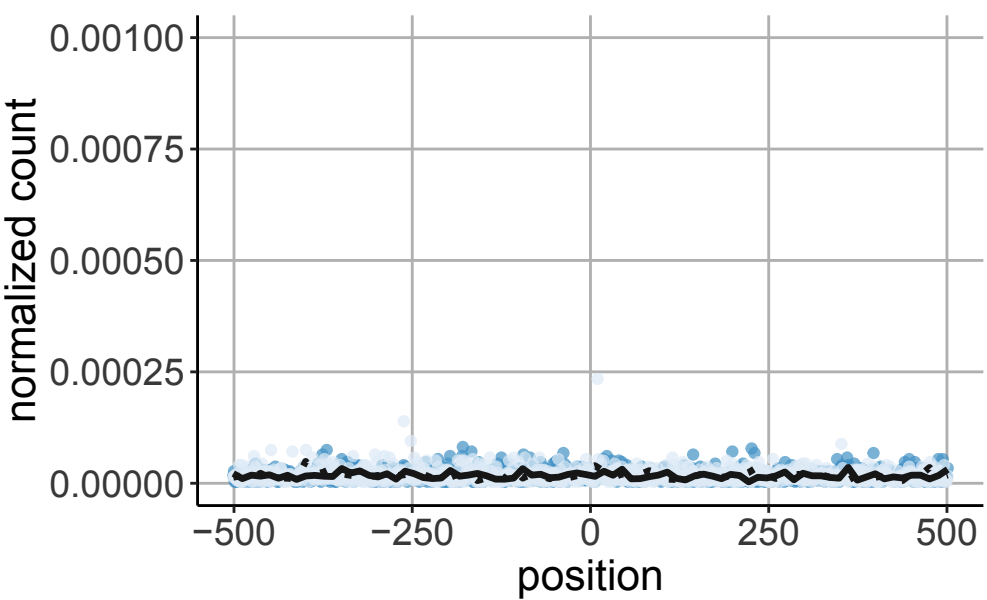

RBMY1J-GCGCAAGAGC

▪ antisense — sense    • antisense • sense

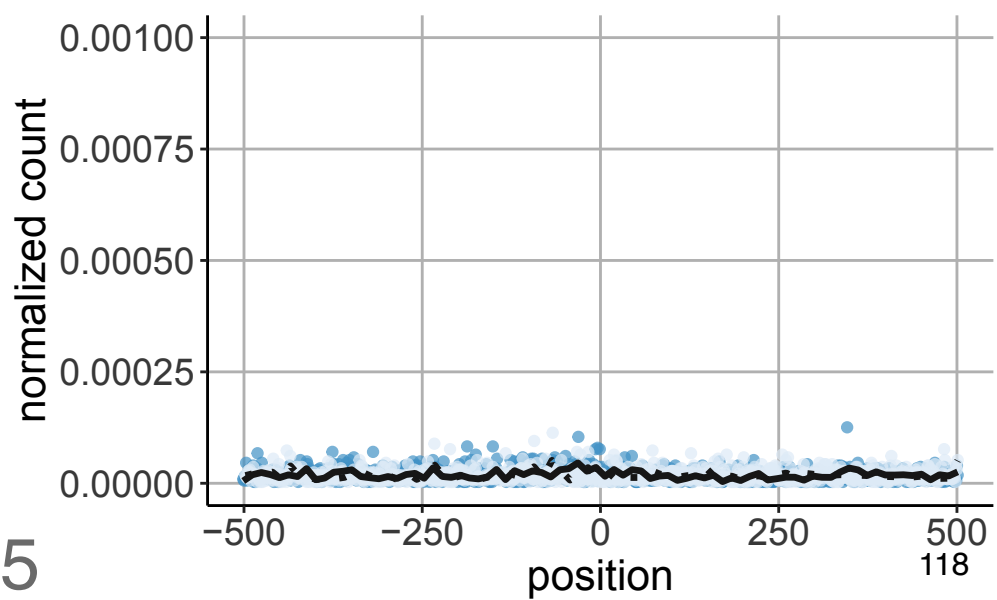

stop codon

RBM1J-NGCGUCGUGGCN

▪ antisense — sense    • antisense • sense

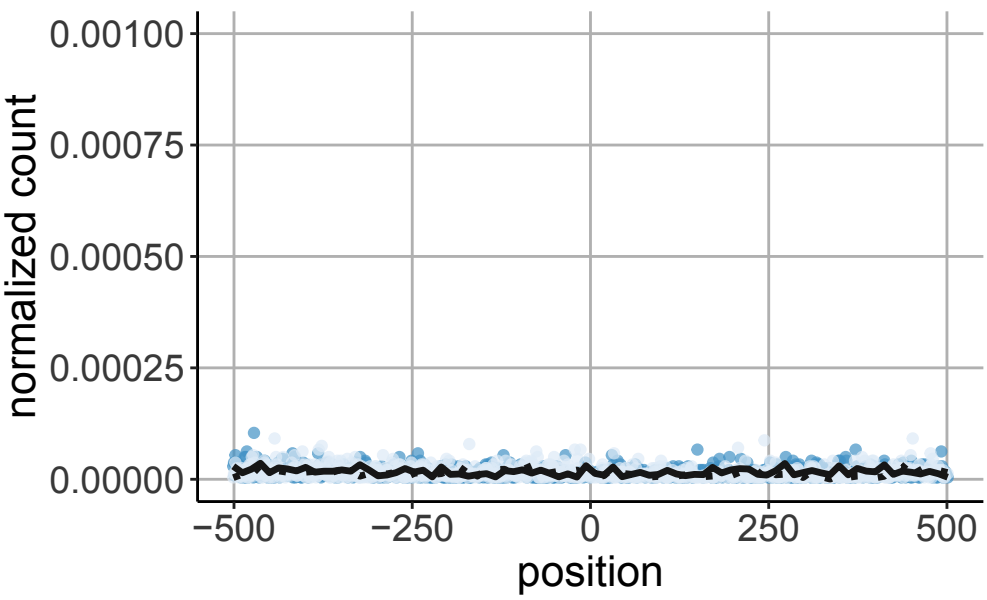

RBM1J-UGAAUUCGUCN

▪ antisense — sense    • antisense • sense

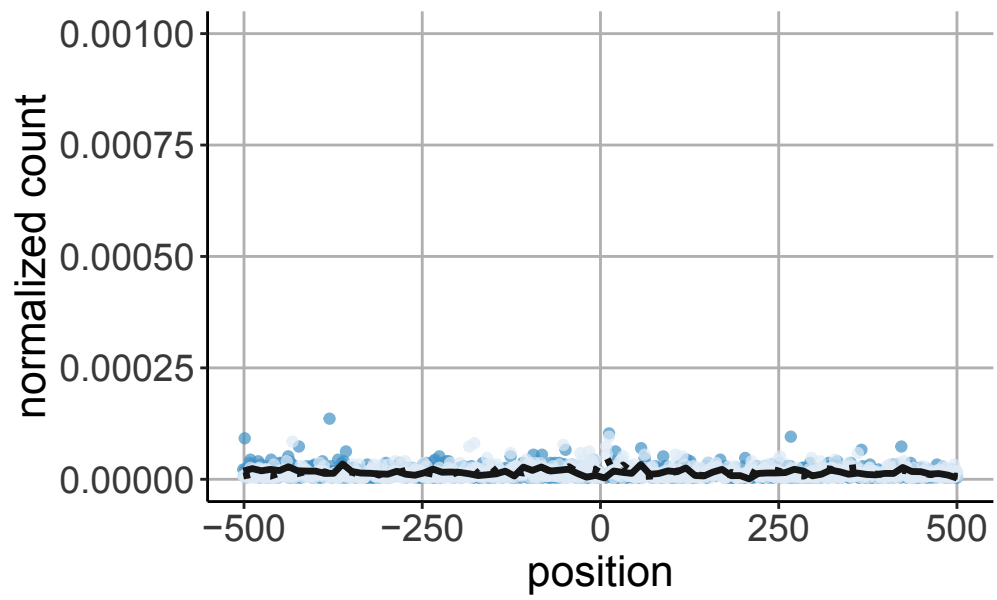

RC3H1\_2-YRCGUUUUAGKR

▪ antisense — sense    • antisense • sense

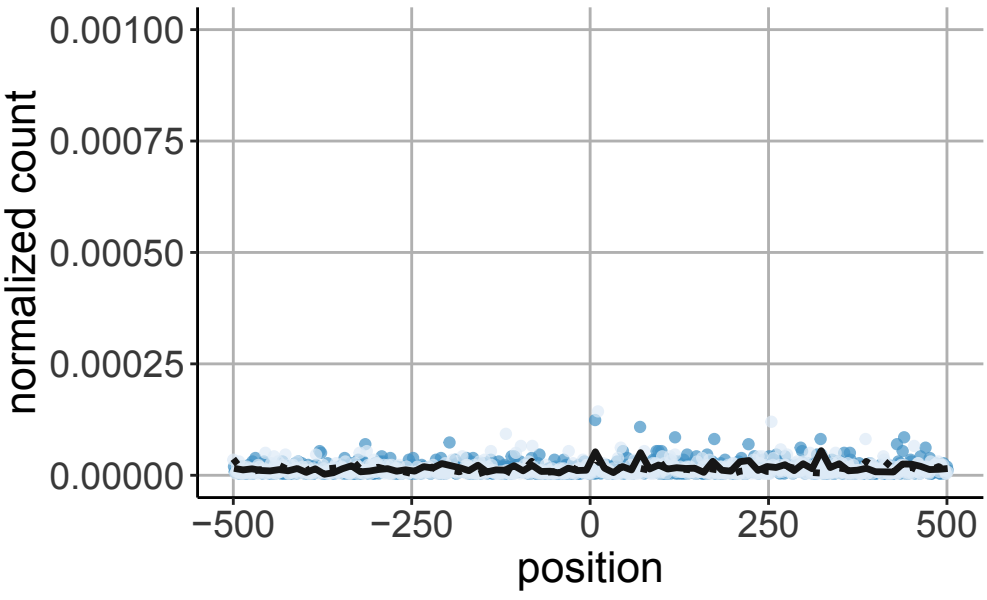

RC3H2-CURCGUUUUAGKAG

▪ antisense — sense    • antisense • sense

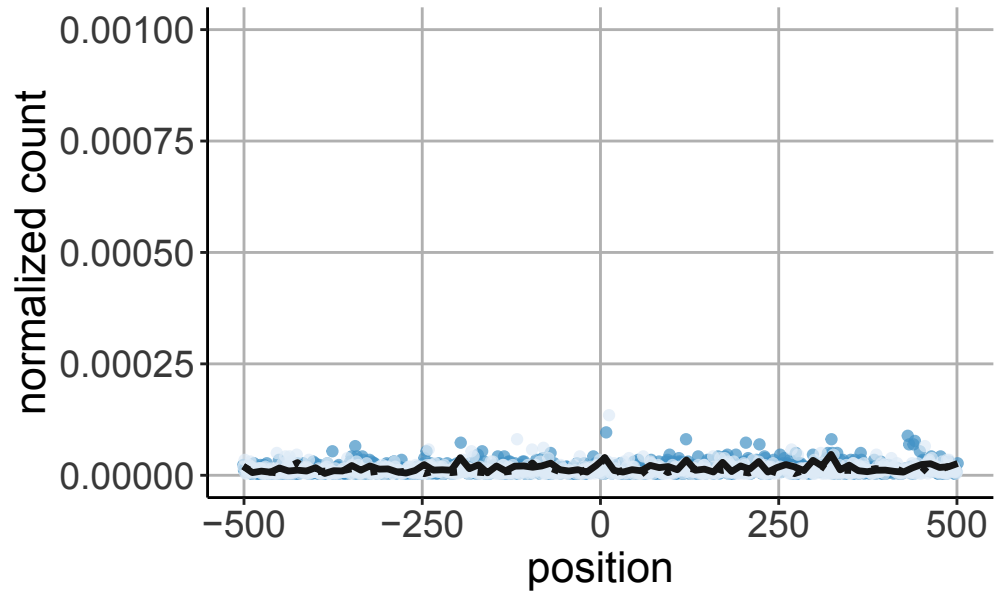

RC3H2-CUCGUAUCGAG

▪ antisense — sense    • antisense • sense

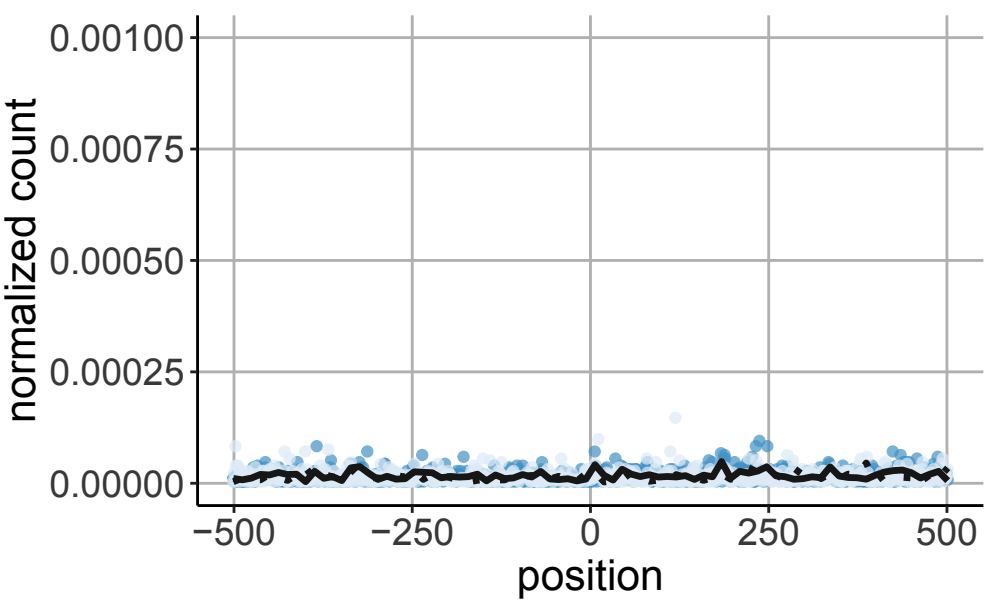

RC3H2-CCUCUNUGAGG

▪ antisense — sense    • antisense • sense

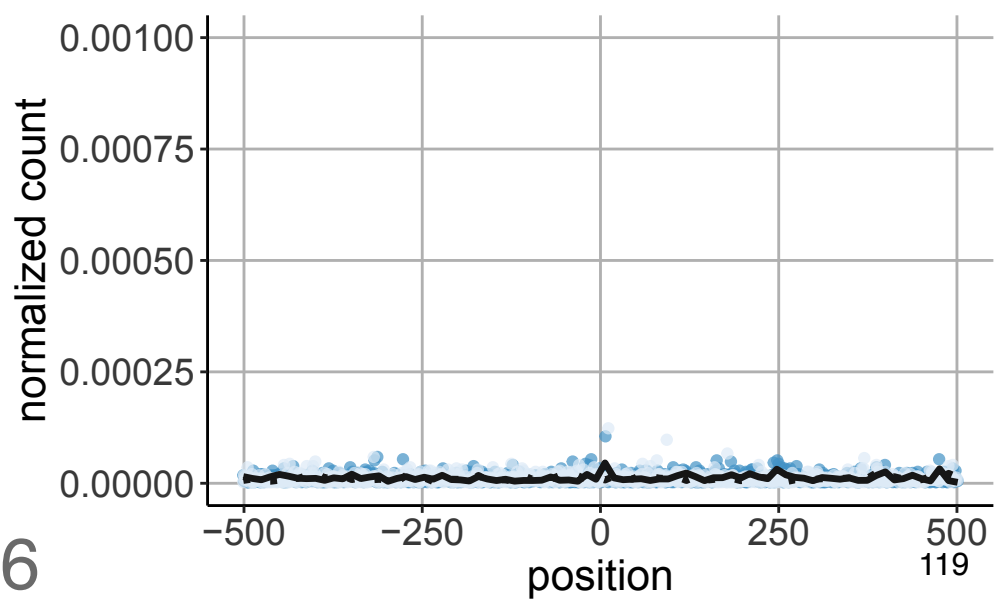



stop codon

RNPC3-GCAGUKUUAGGGY

▪ antisense — sense    • antisense • sense

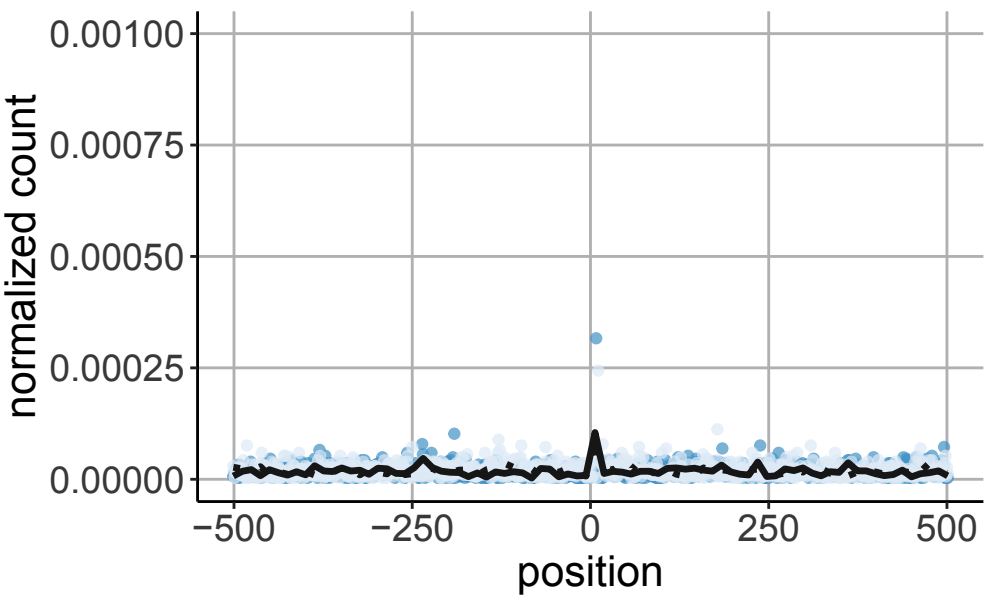

YBX1-RCCAYRHCAUCGY

▪ antisense — sense    • antisense • sense

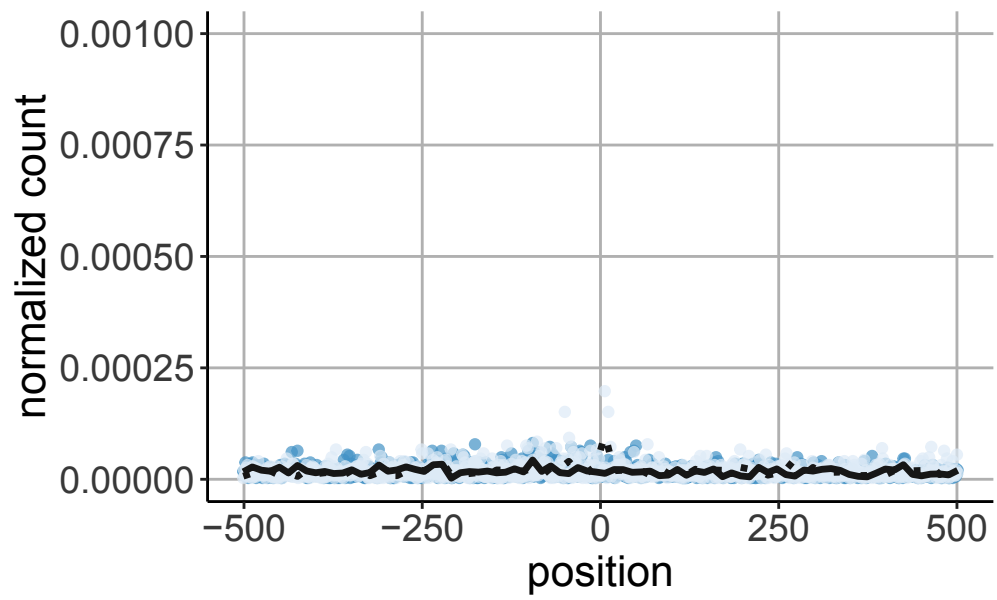

ZC3H12A-NGCAGGUAAGUGCN

▪ antisense — sense    • antisense • sense

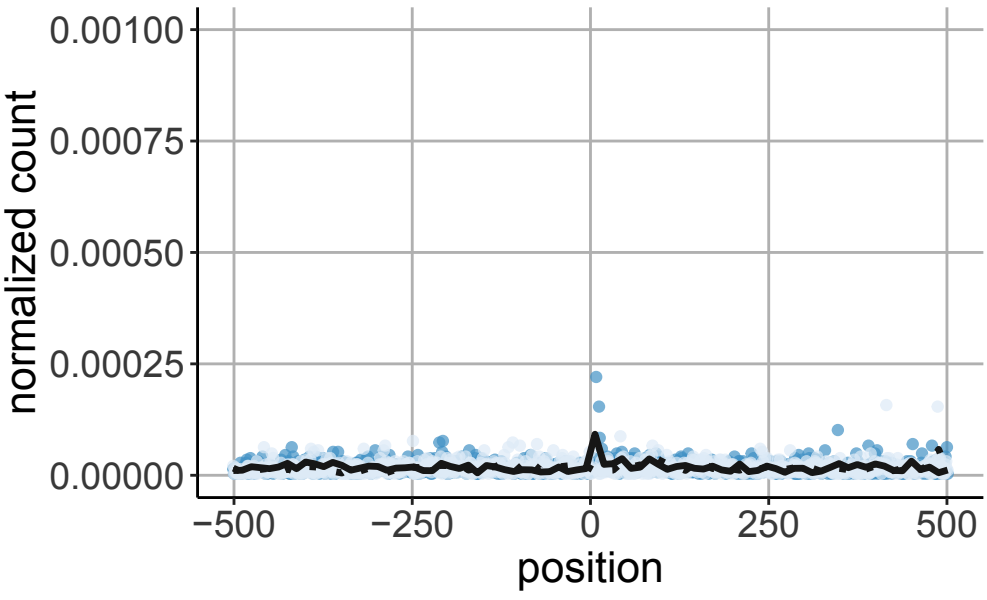

ZC3H12B-NGCAGGUAAGUGSN

▪ antisense — sense    • antisense • sense

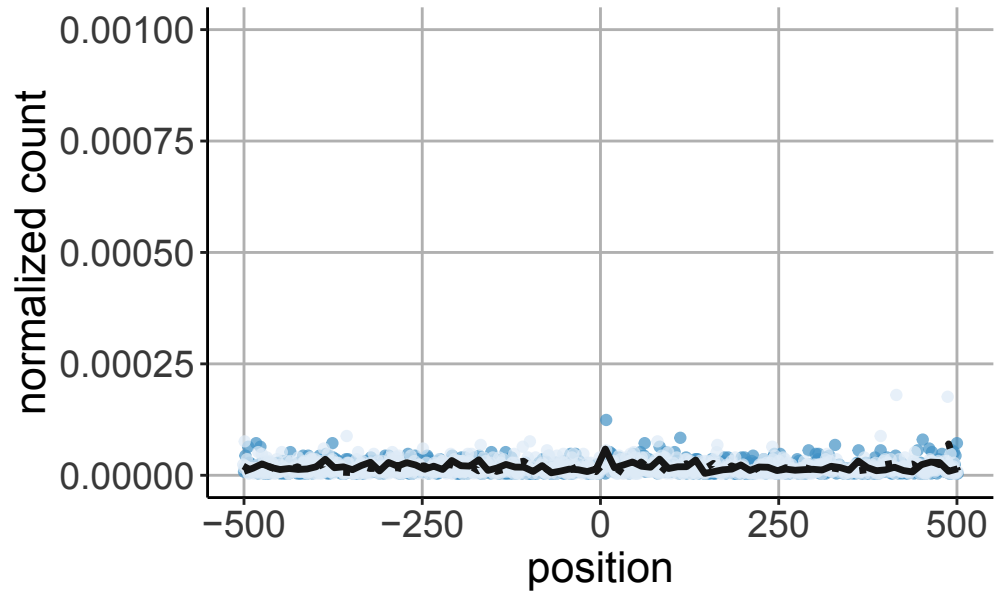

ZC3H12B-SCAGGUAUUAUGS

▪ antisense — sense    • antisense • sense

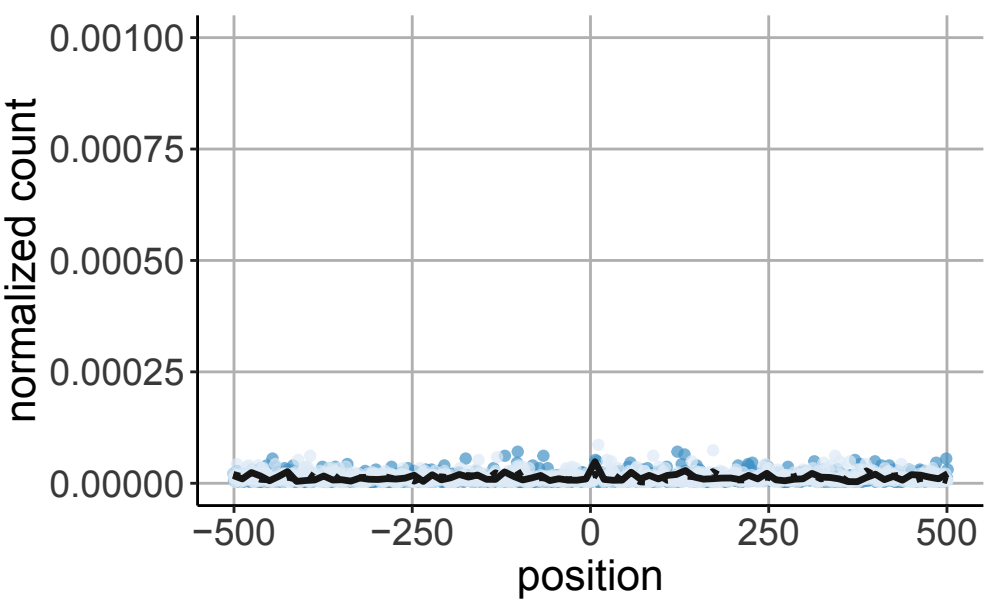

Supplement: supp_gr.258848.119_Supplemental_Data_S2.pdf [file supp_gr.258848.119_Supplemental_Data_S2.pdf]
