# Supplementary material for: Binding specificities of human RNA-binding proteins toward structured and linear RNA sequences
Source: PubMed Central journal article supplement — Genome Res. 2020 Jul;30(7):962–73. doi: 10.1101/gr.258848.119 (PMC7397871; doi:10.1101/gr.258848.119), 2020-07
Supplement: supp_gr.258848.119_Supplemental_Data_S3.pdf [file supp_gr.258848.119_Supplemental_Data_S3.pdf]

# Histograms of the distances between motif matches and genomic features

Table of contents

*(Click line to access the first page of each section)*

|                                                   |                      |
|---------------------------------------------------|----------------------|
| <b>Splice acceptor, linear motif</b>              | <b>Pages 1-7</b>     |
| <b>Splice acceptor, structured motif</b>          | <b>Pages 18-24</b>   |
| <b>Splice donor, linear motif</b>                 | <b>Pages 25-41</b>   |
| <b>Splice donor, structured motif</b>             | <b>Pages 42-48</b>   |
| <b>Transcription start site, linear motif</b>     | <b>Pages 49-65</b>   |
| <b>Transcription start site, structured motif</b> | <b>Pages 66-72</b>   |
| <b>Start codon, linear motif</b>                  | <b>Pages 73-89</b>   |
| <b>Stop codon, structured motif</b>               | <b>Pages 90-96</b>   |
| <b>Start codon, linear motif</b>                  | <b>Pages 97-113</b>  |
| <b>Stop codon, structured motif</b>               | <b>Pages 114-120</b> |

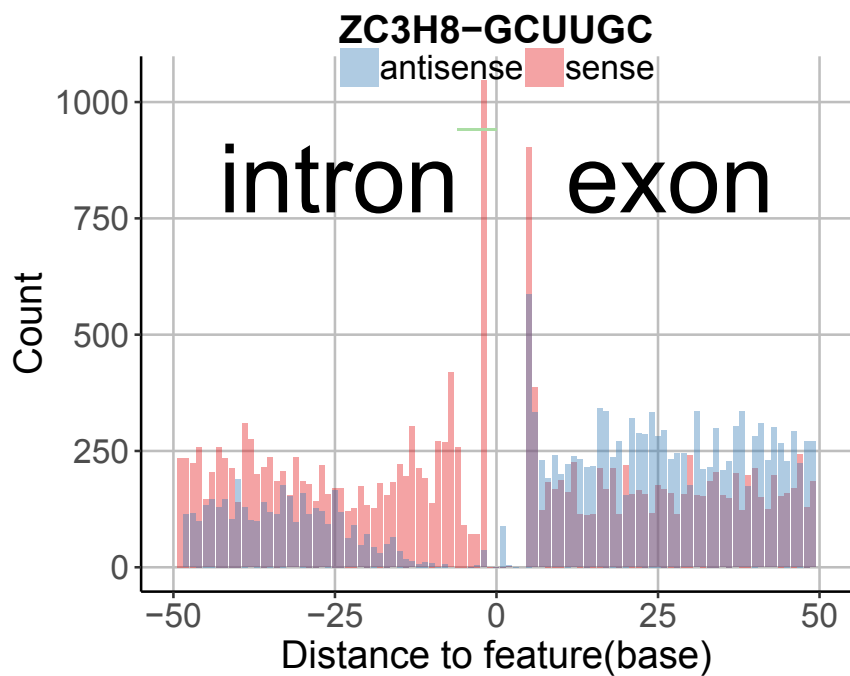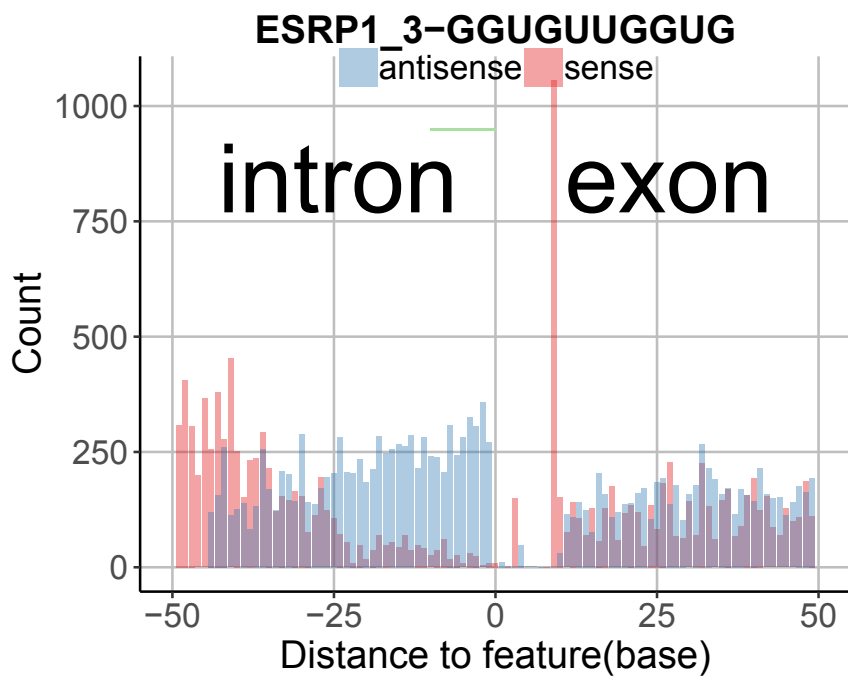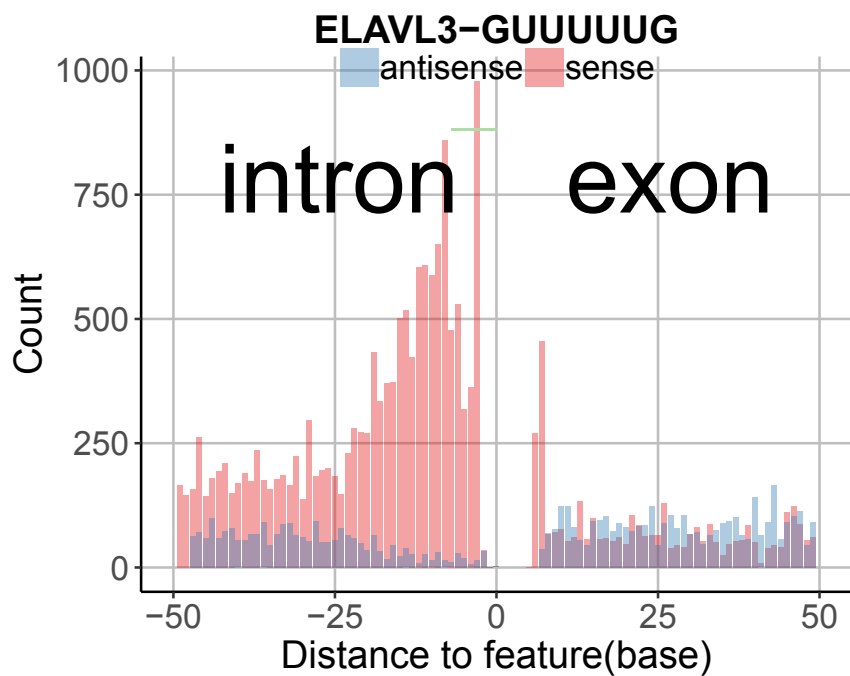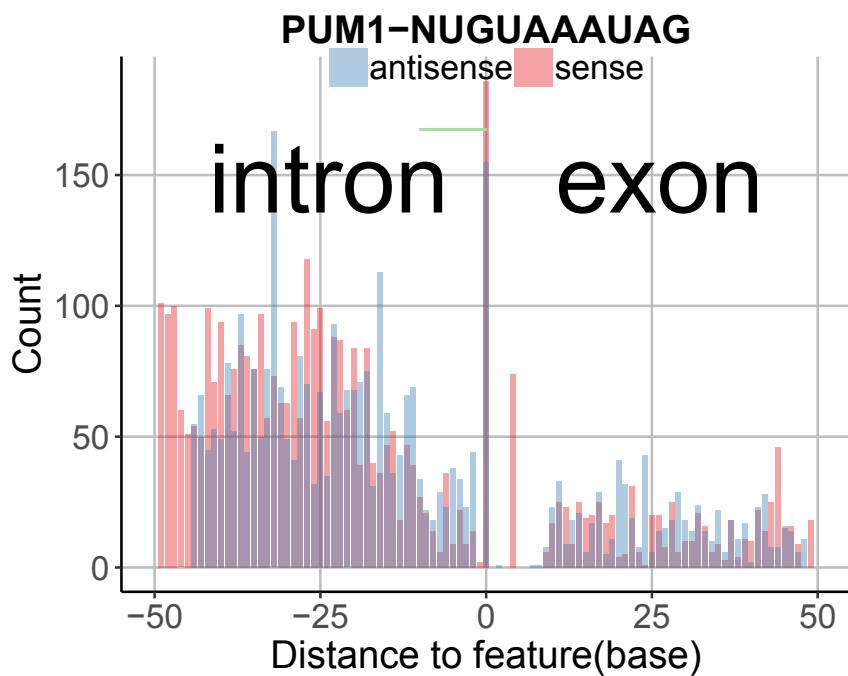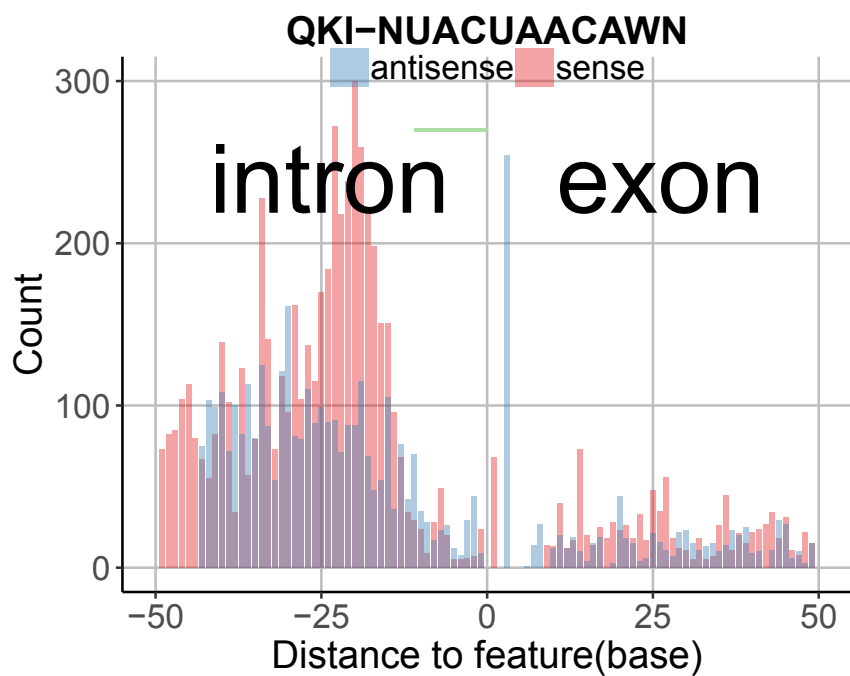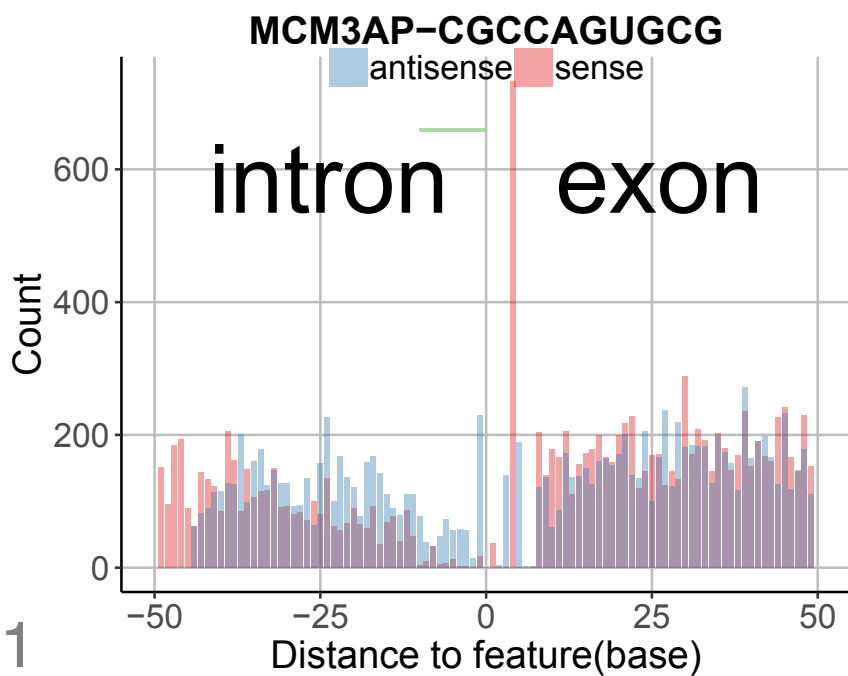

1

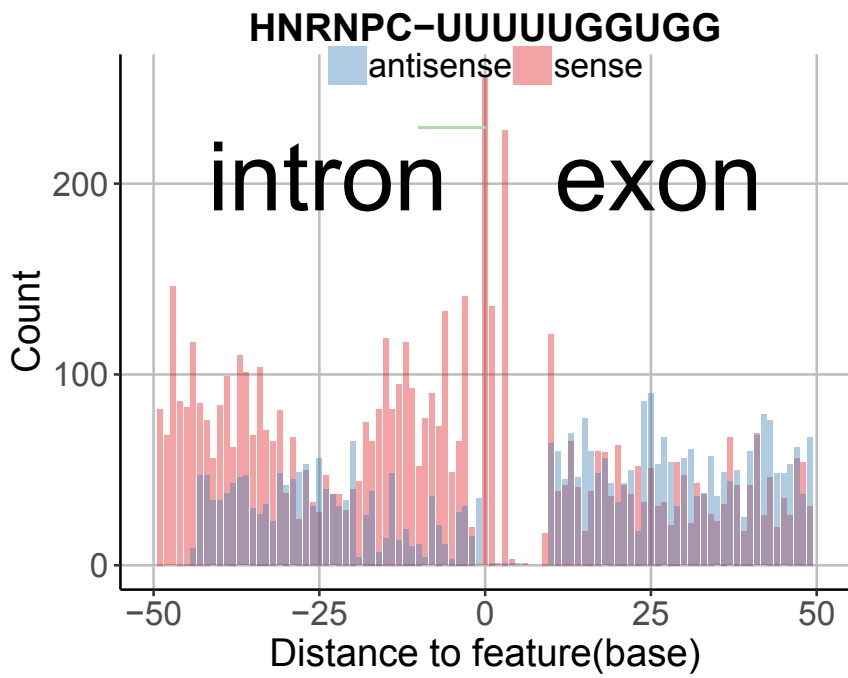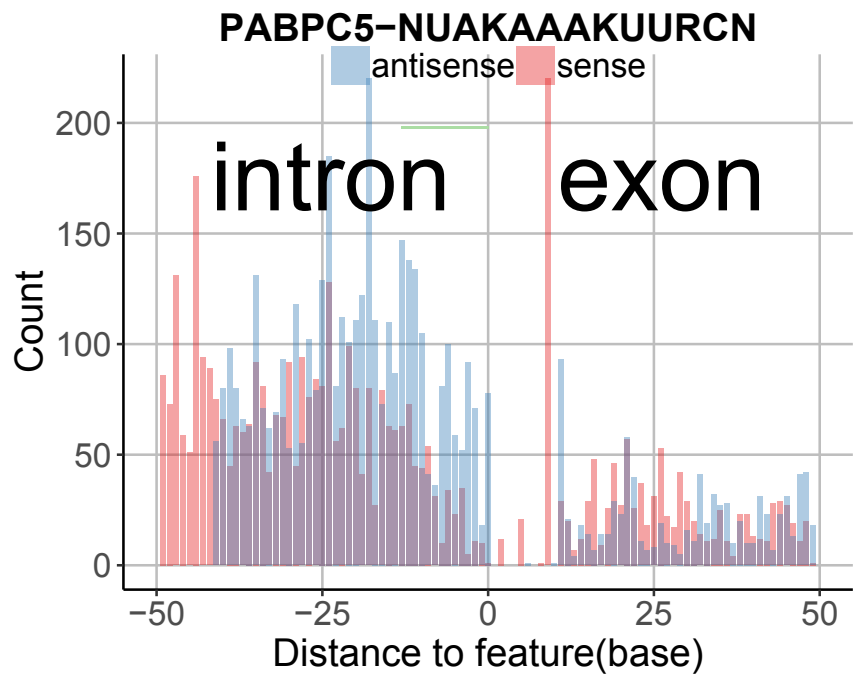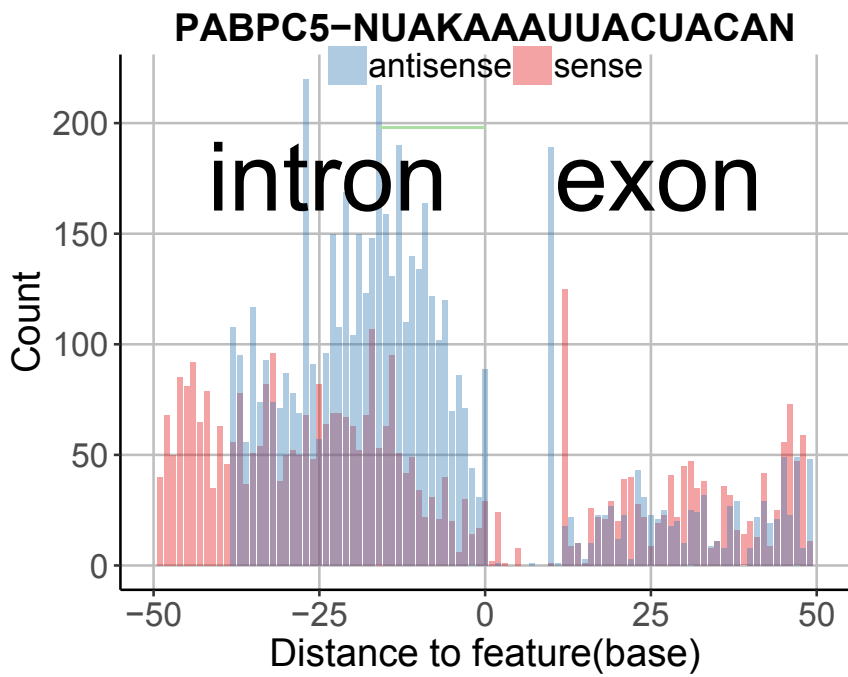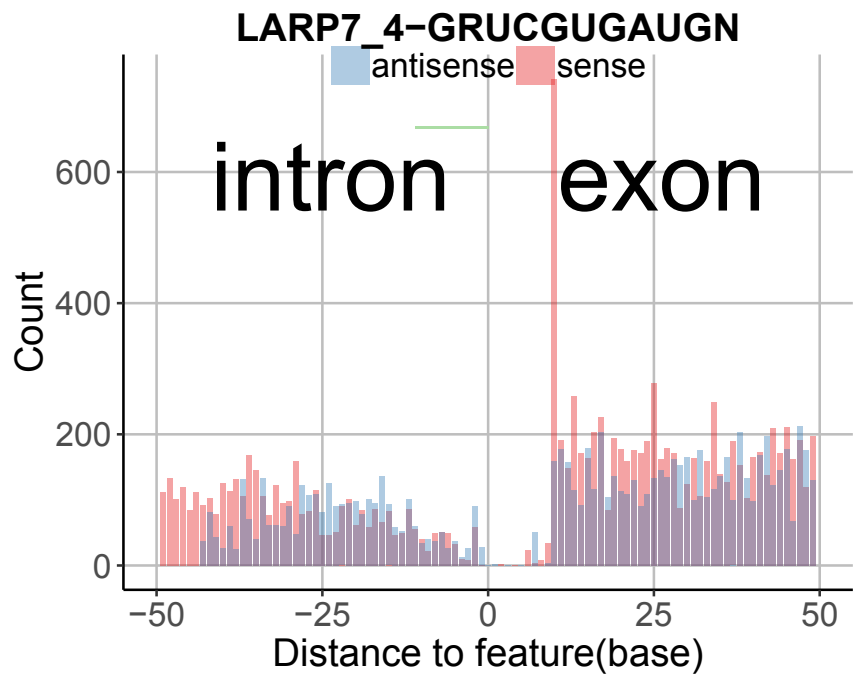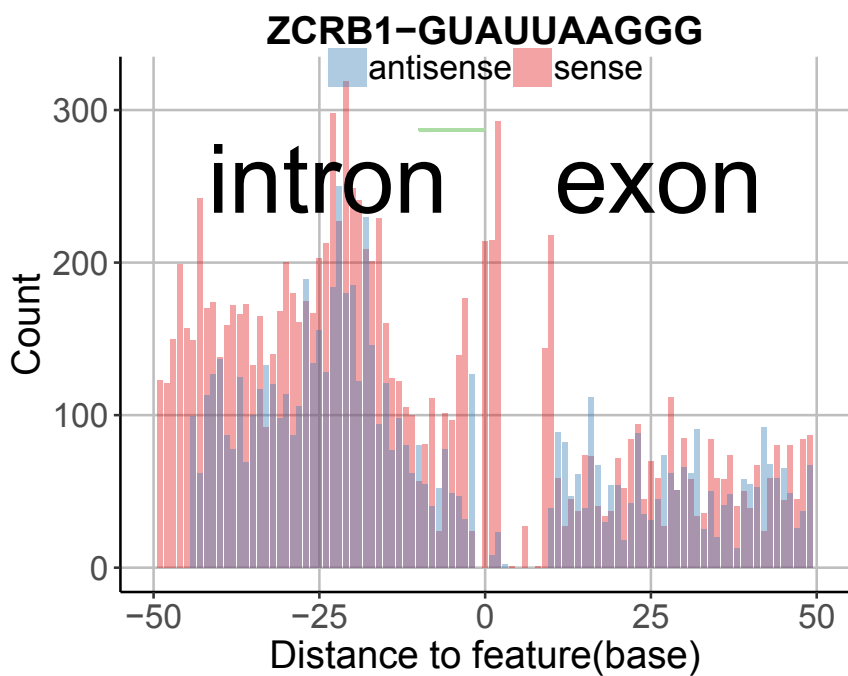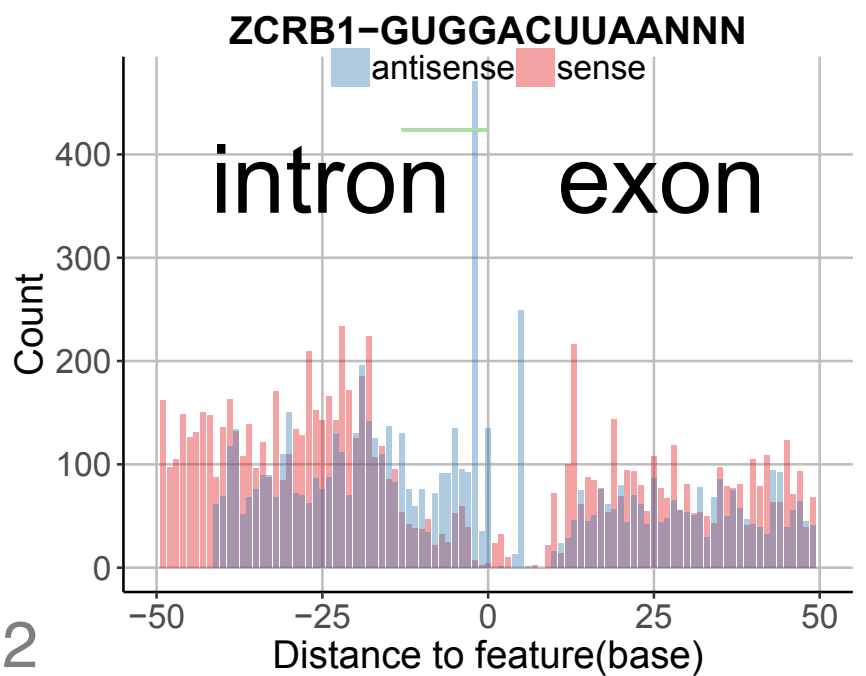

2

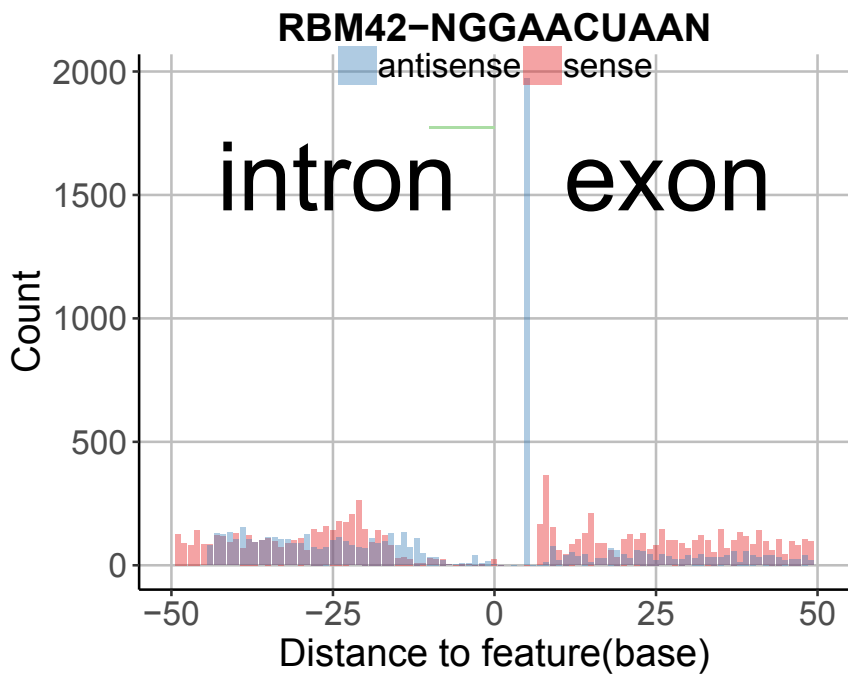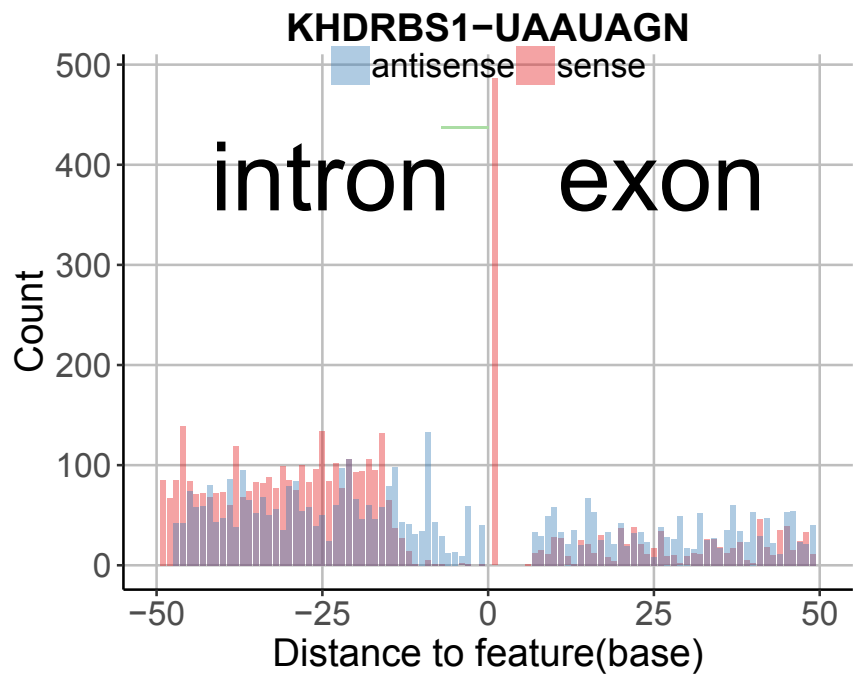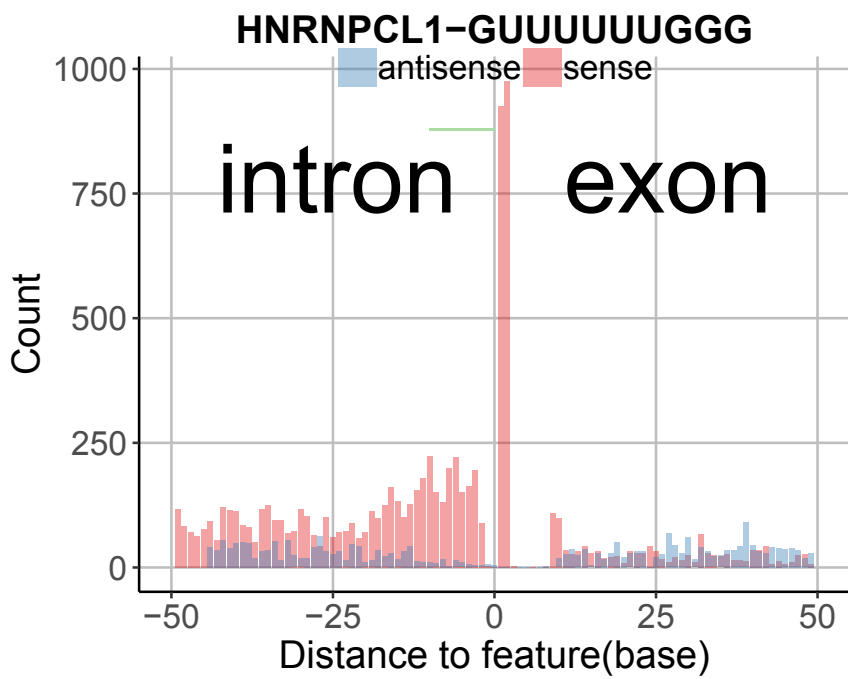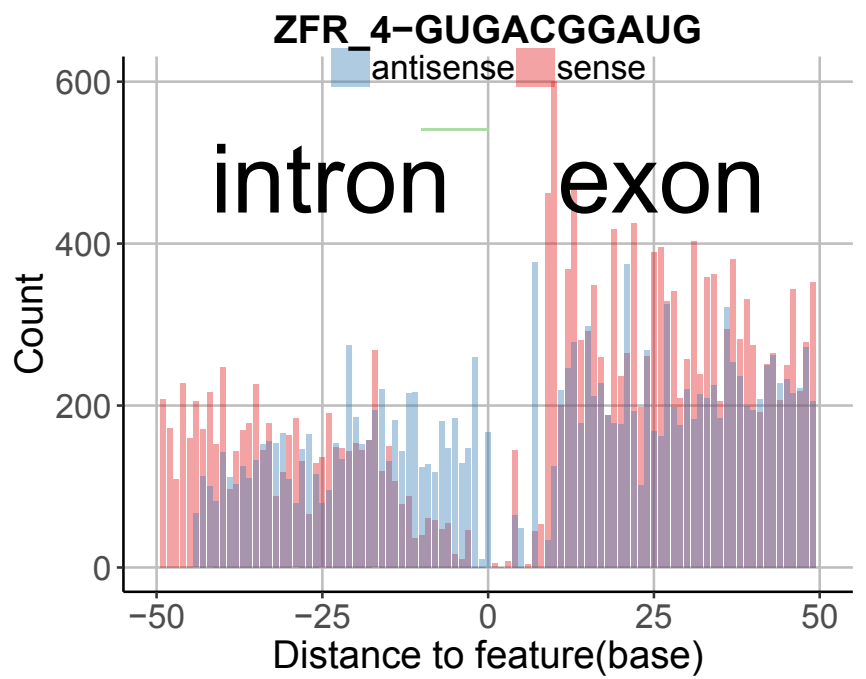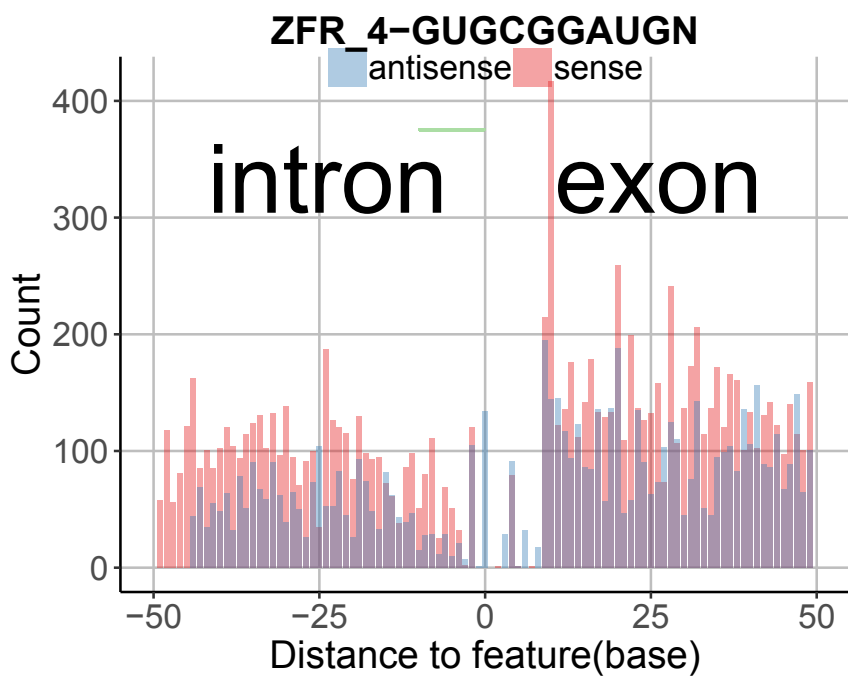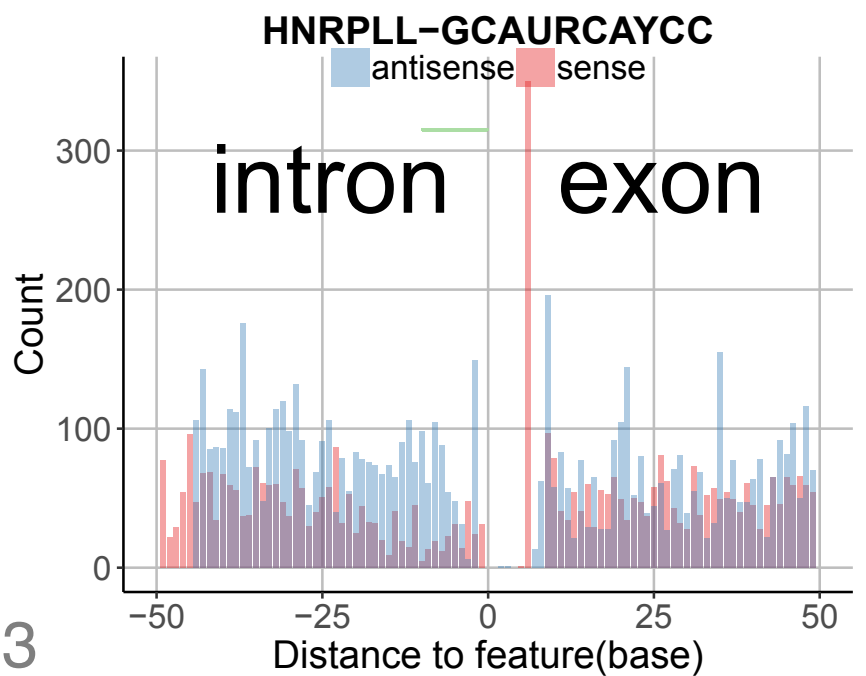

3

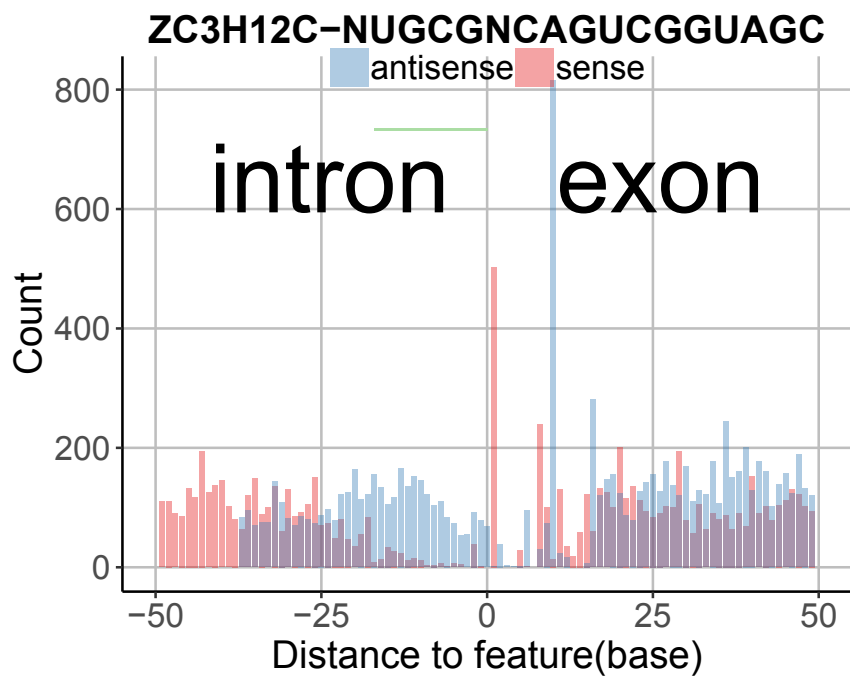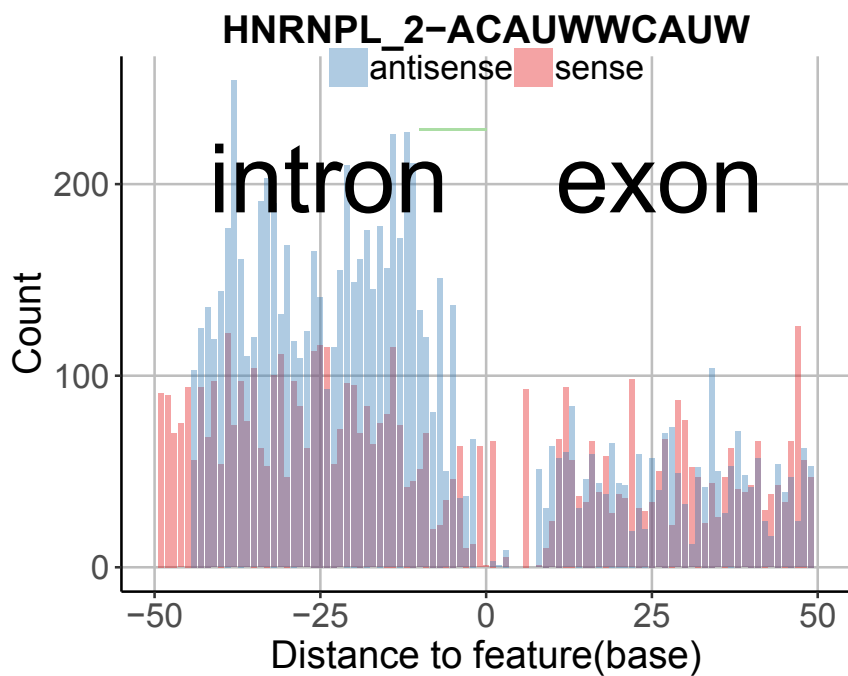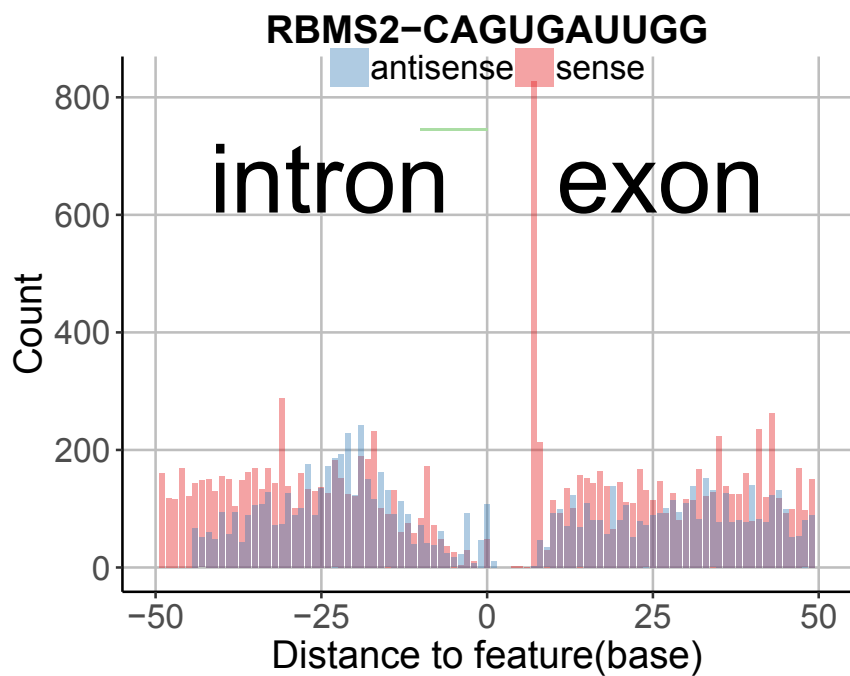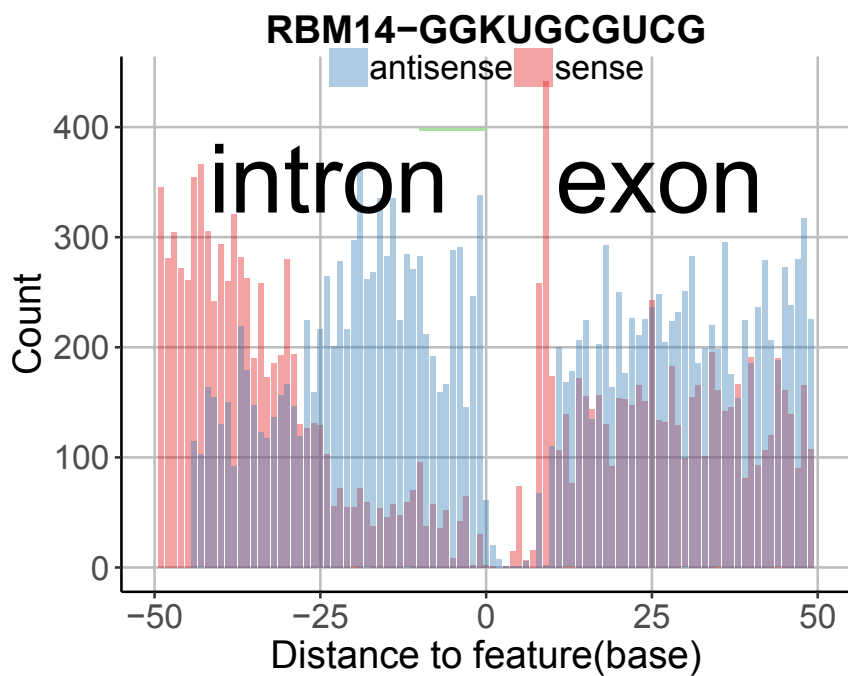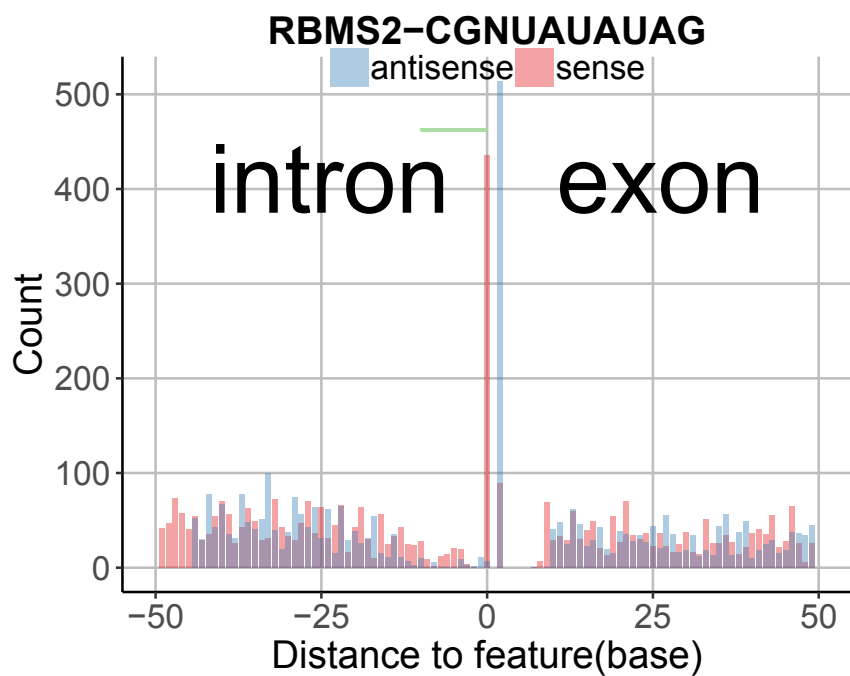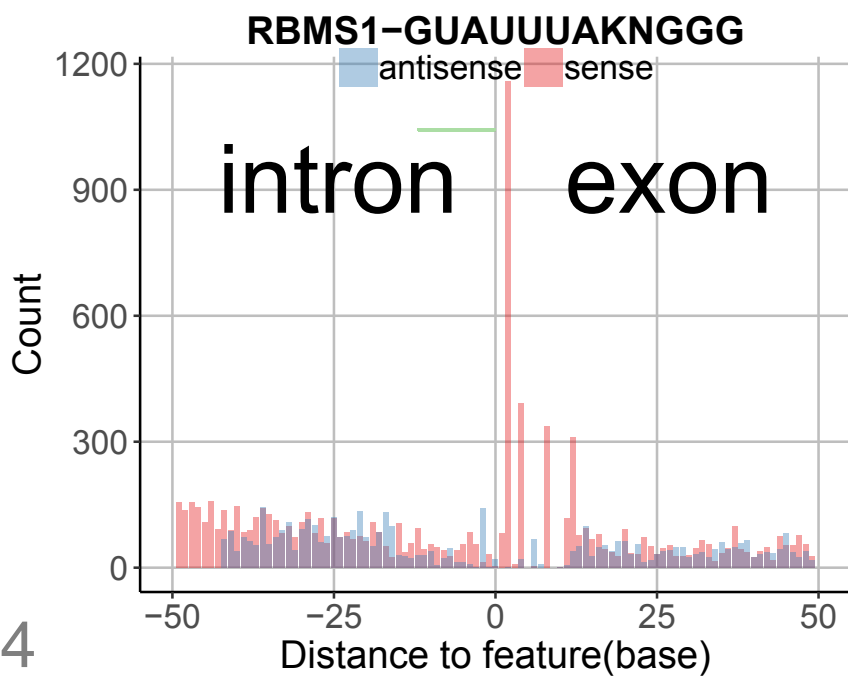

4

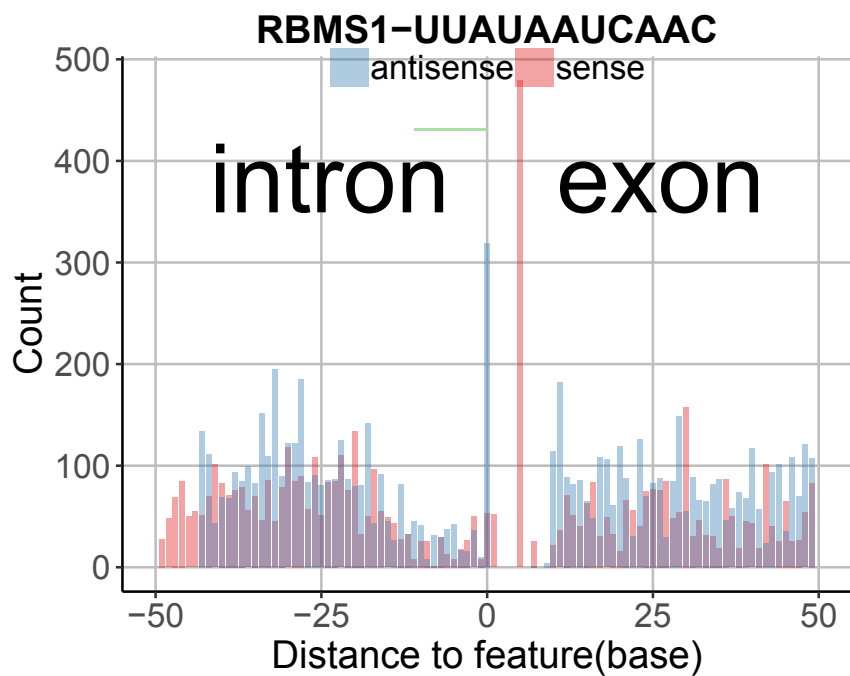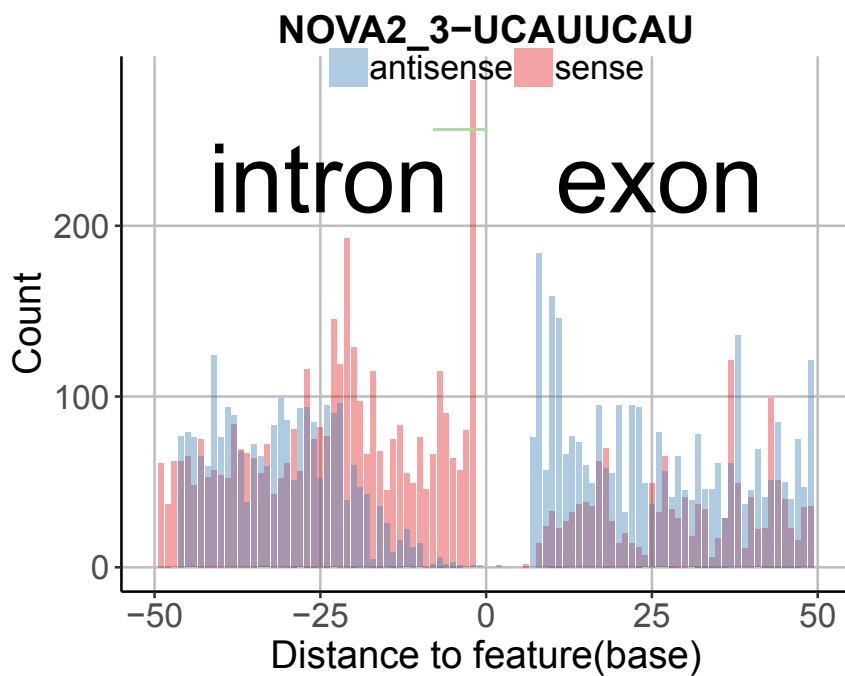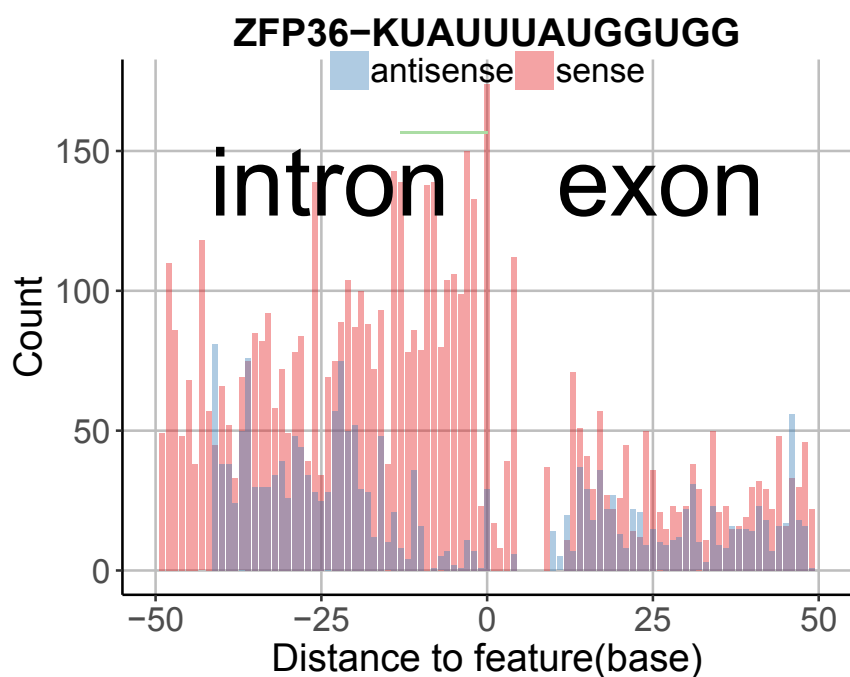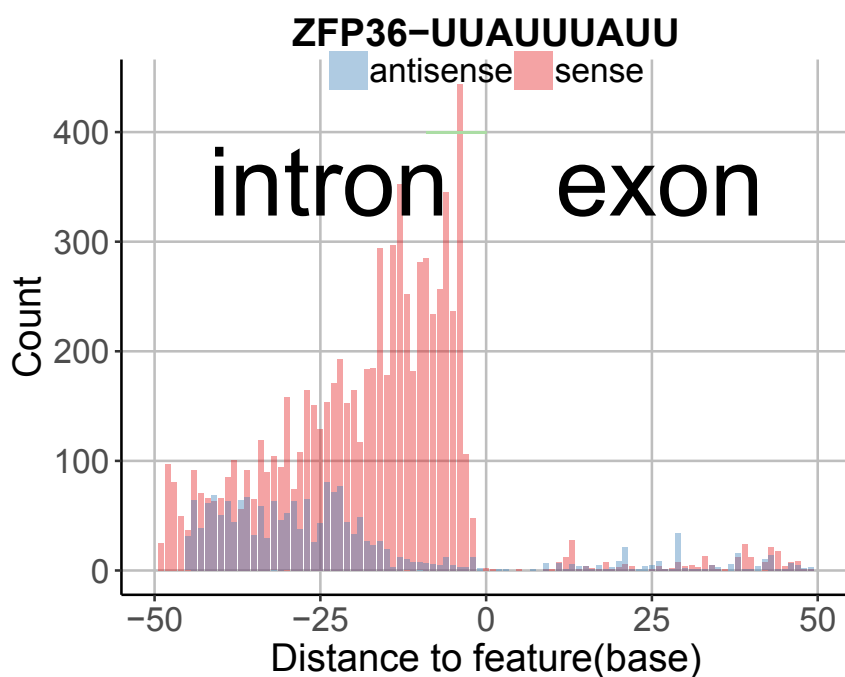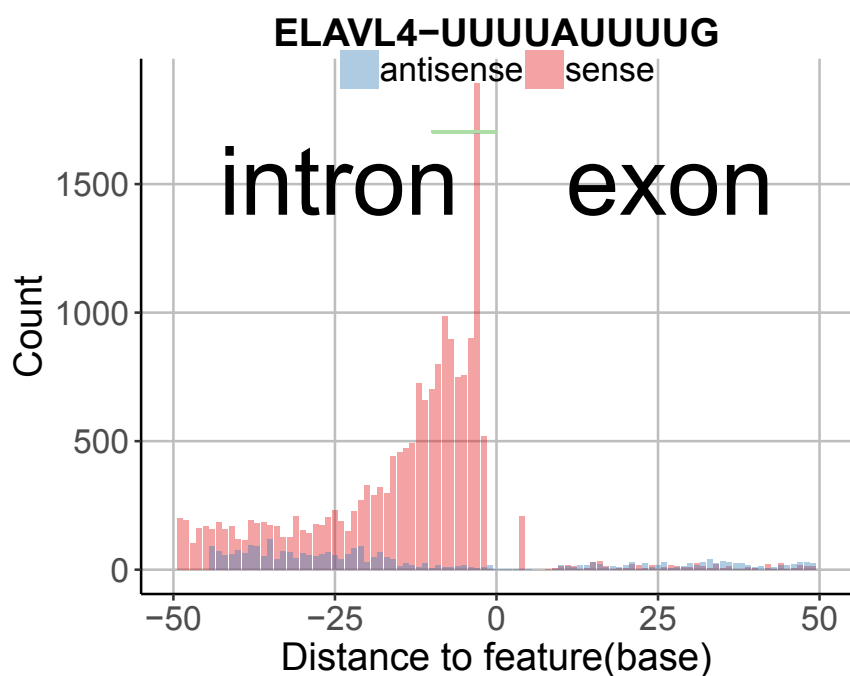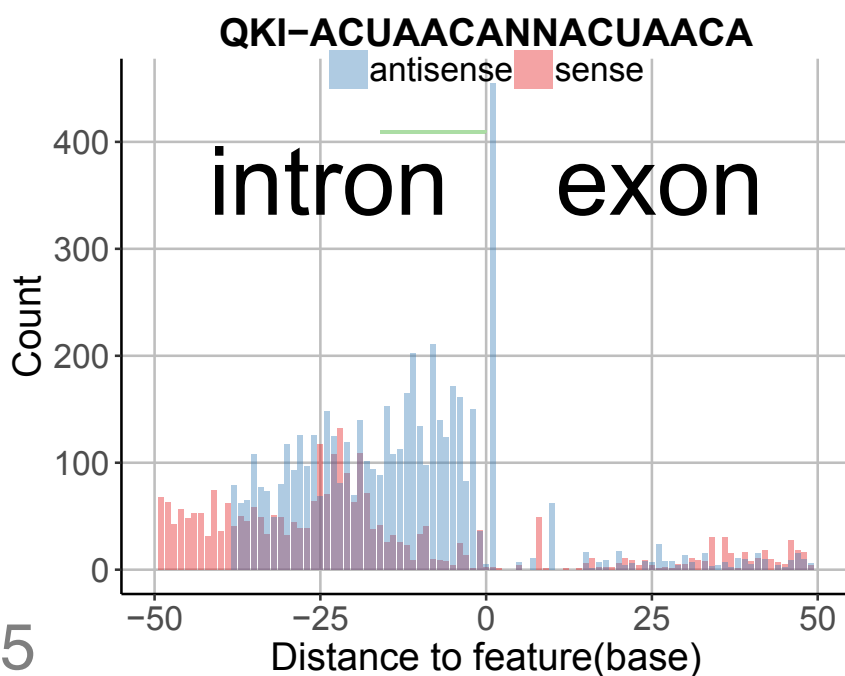

5

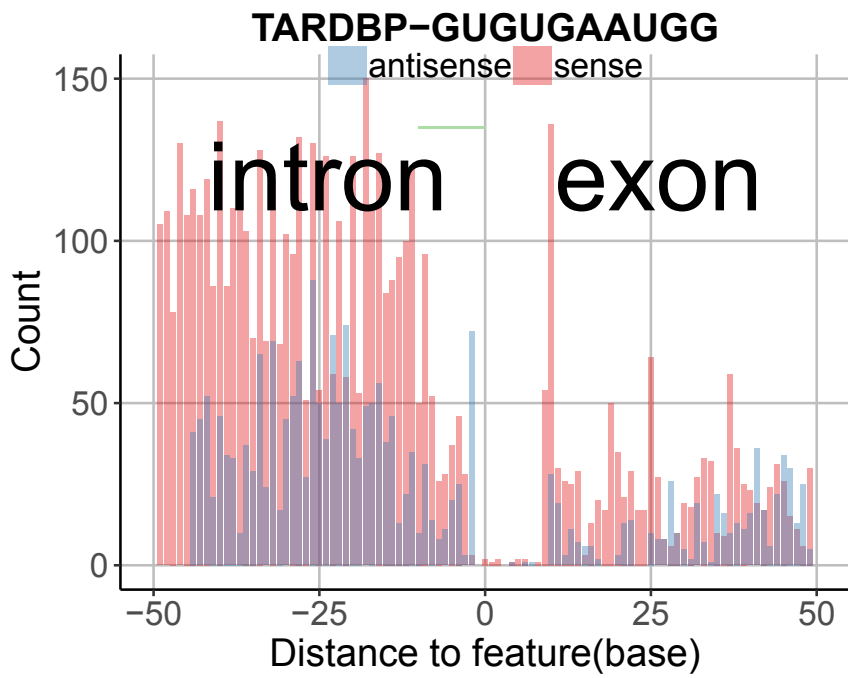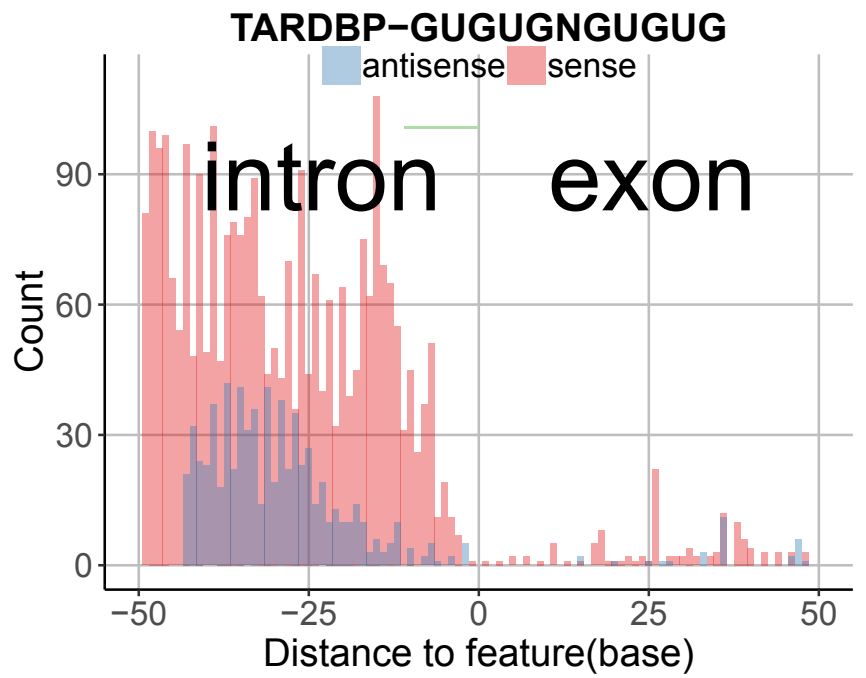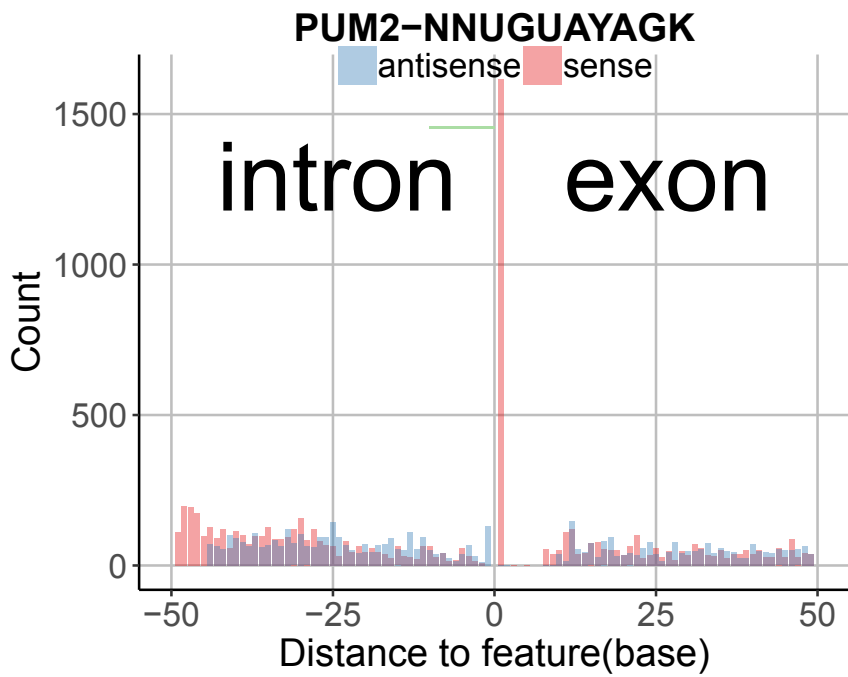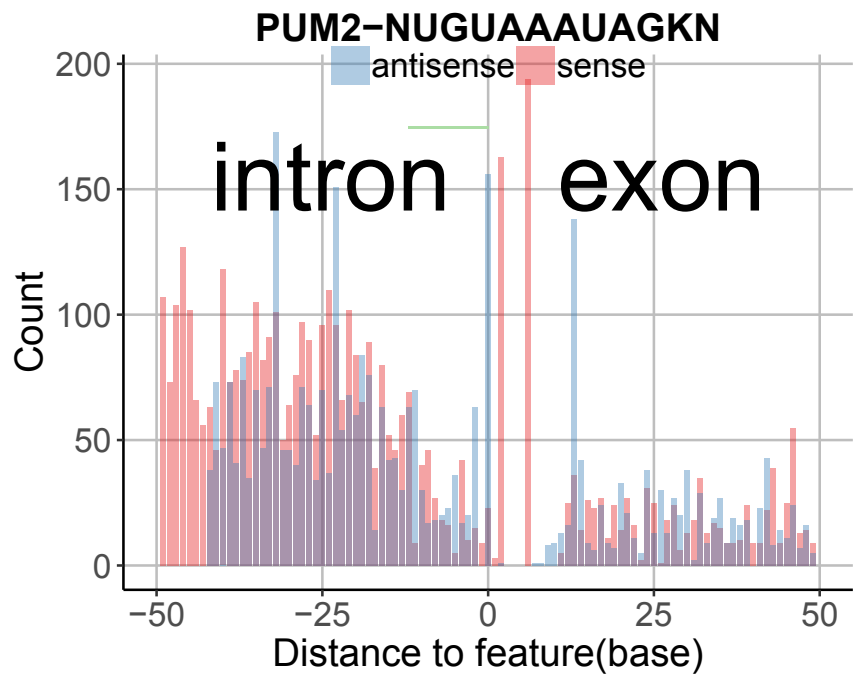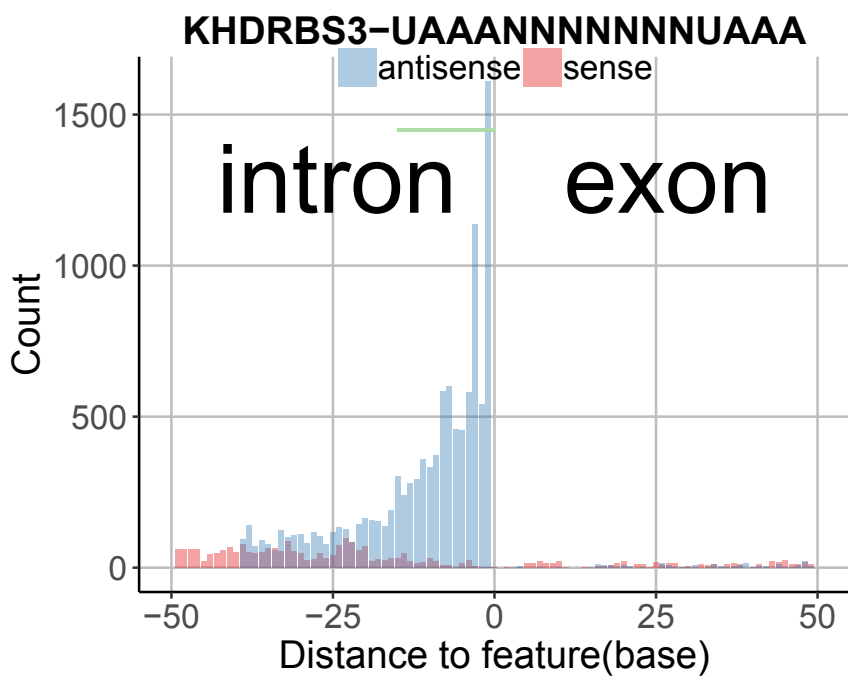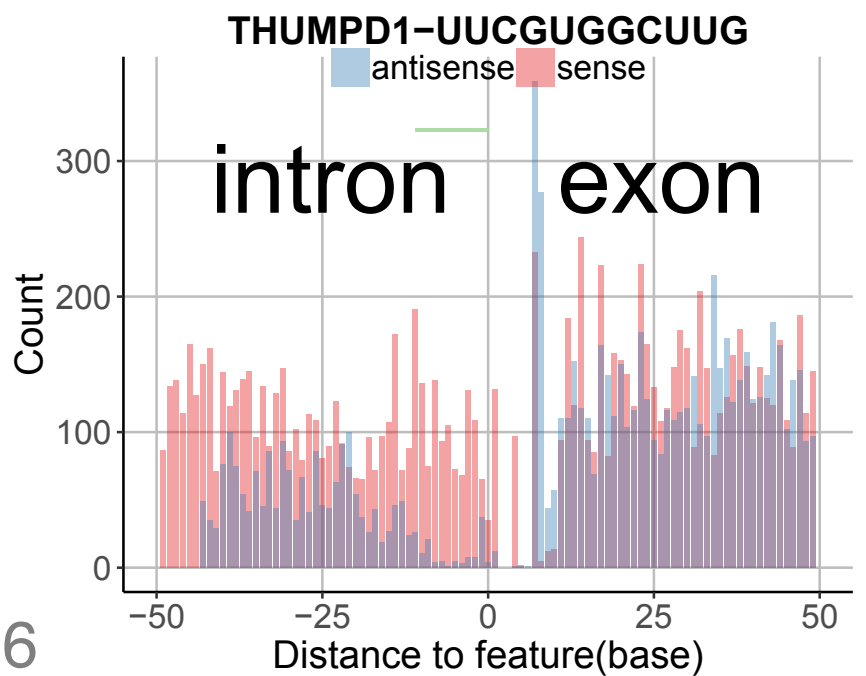

6

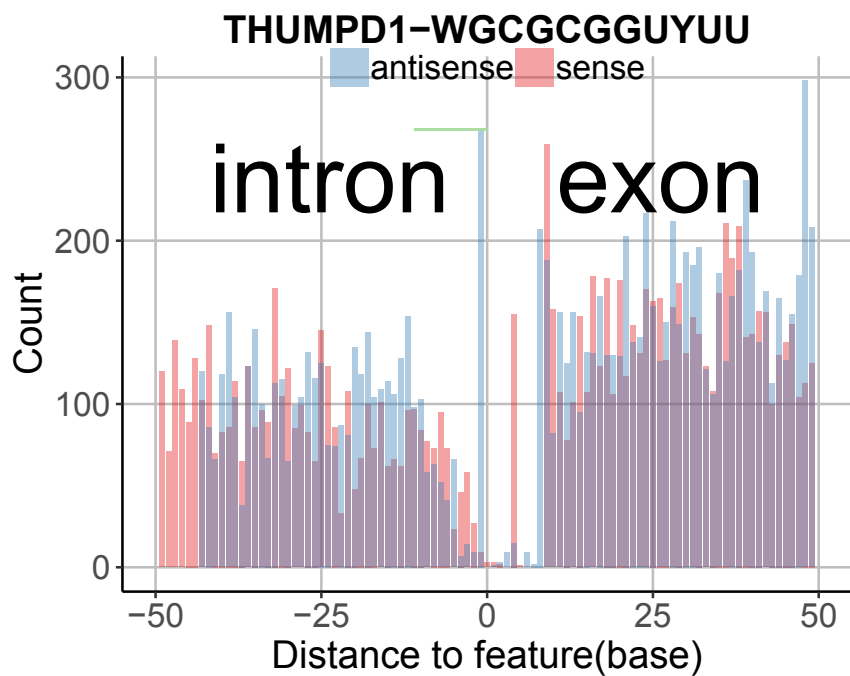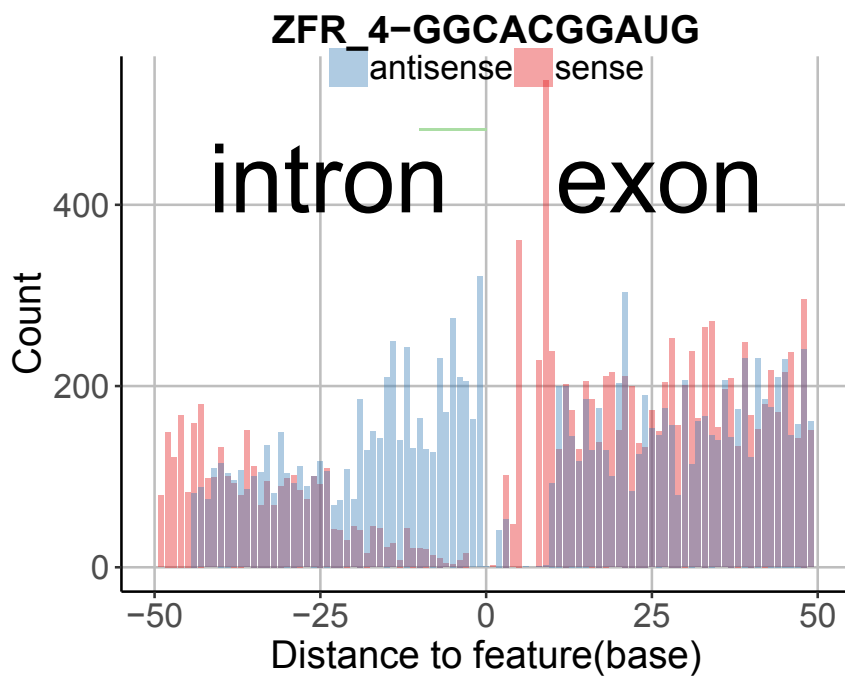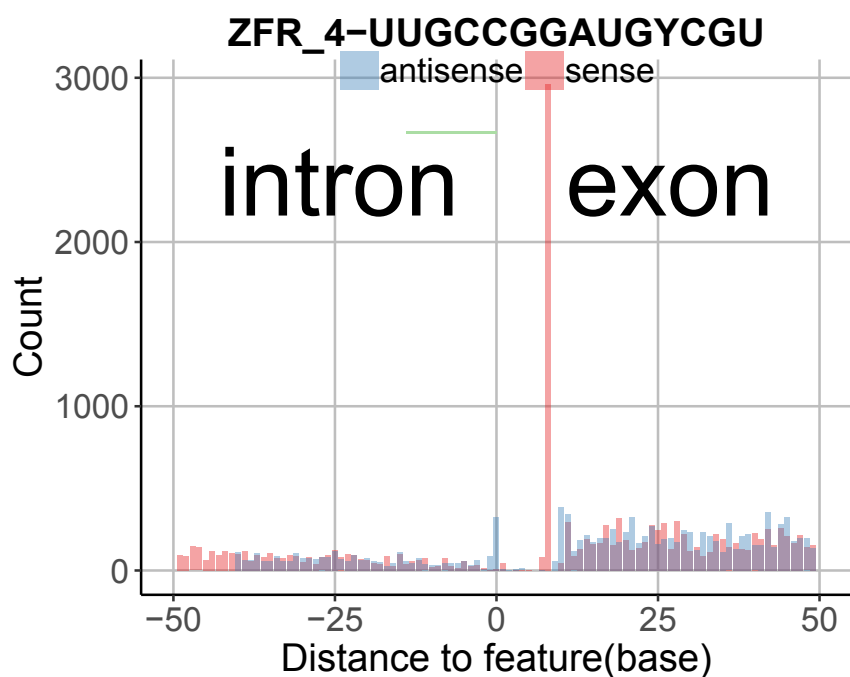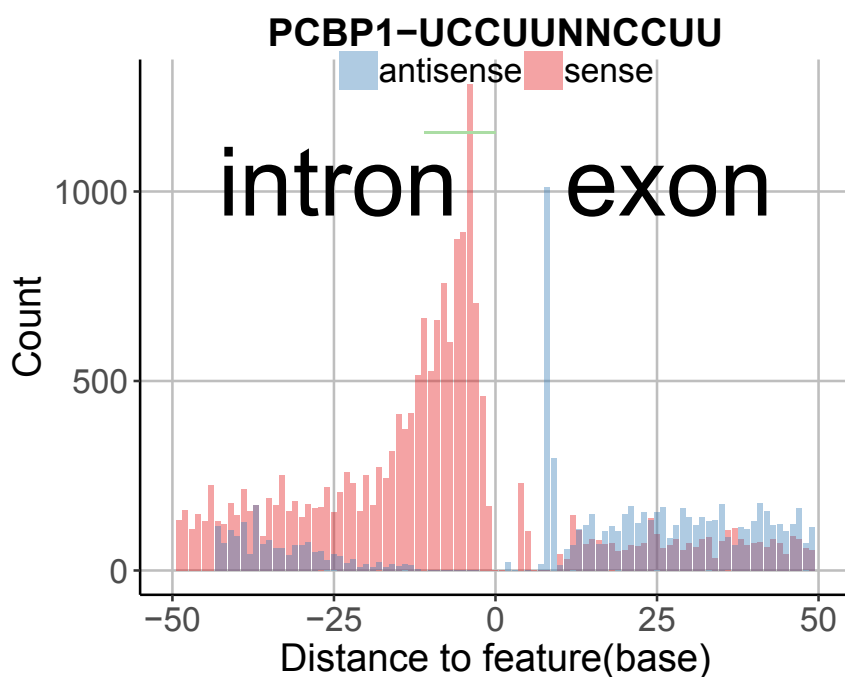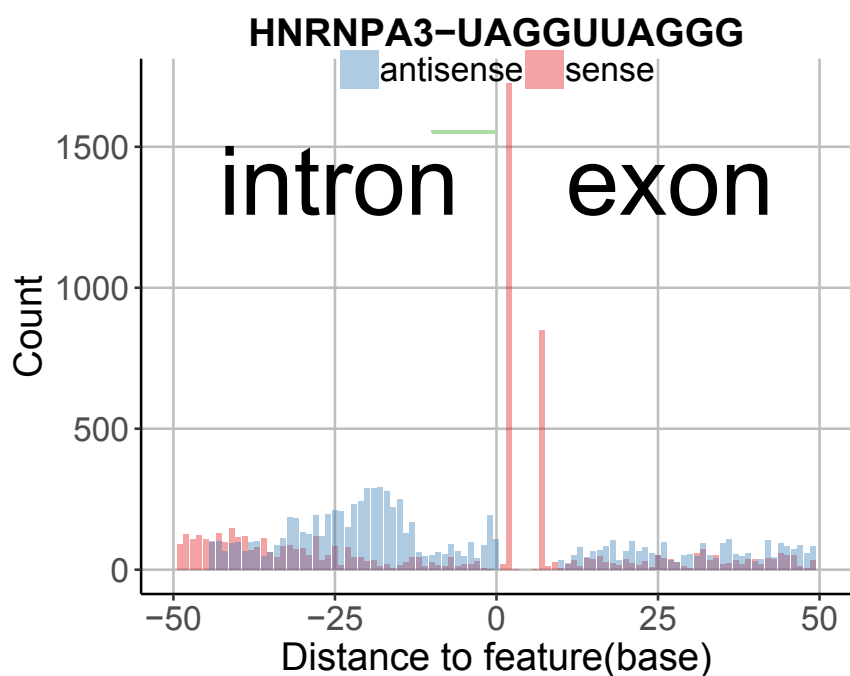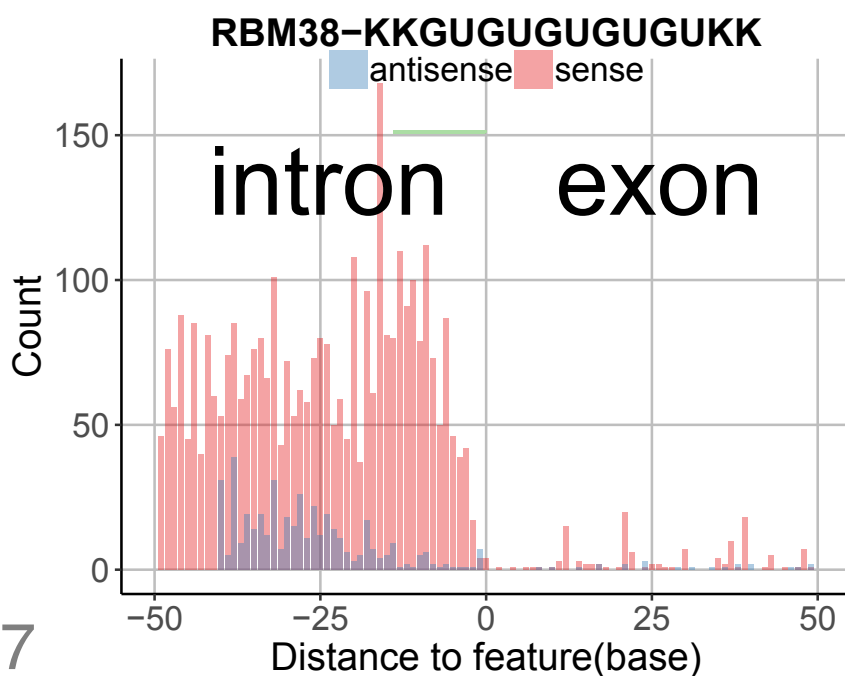

7



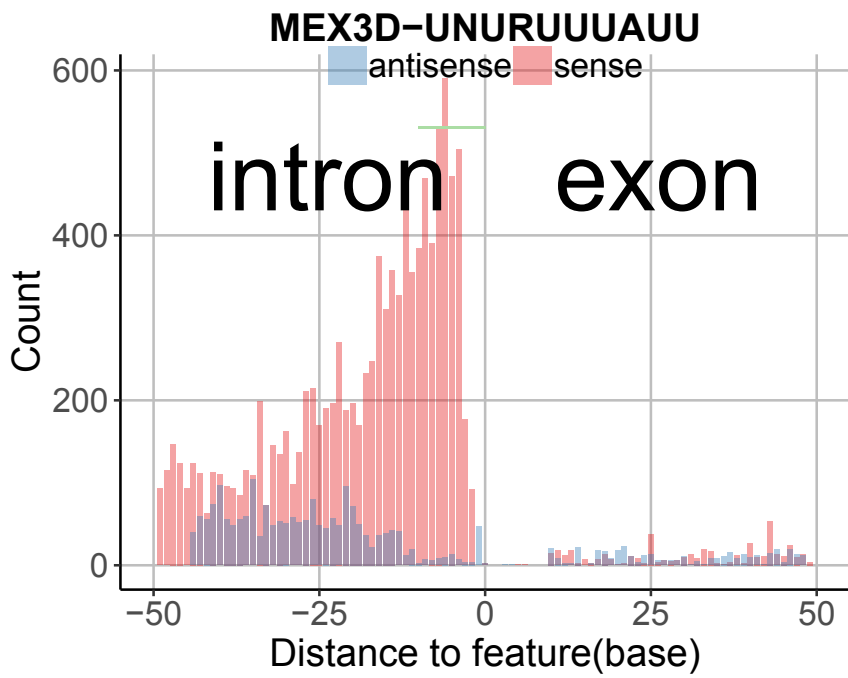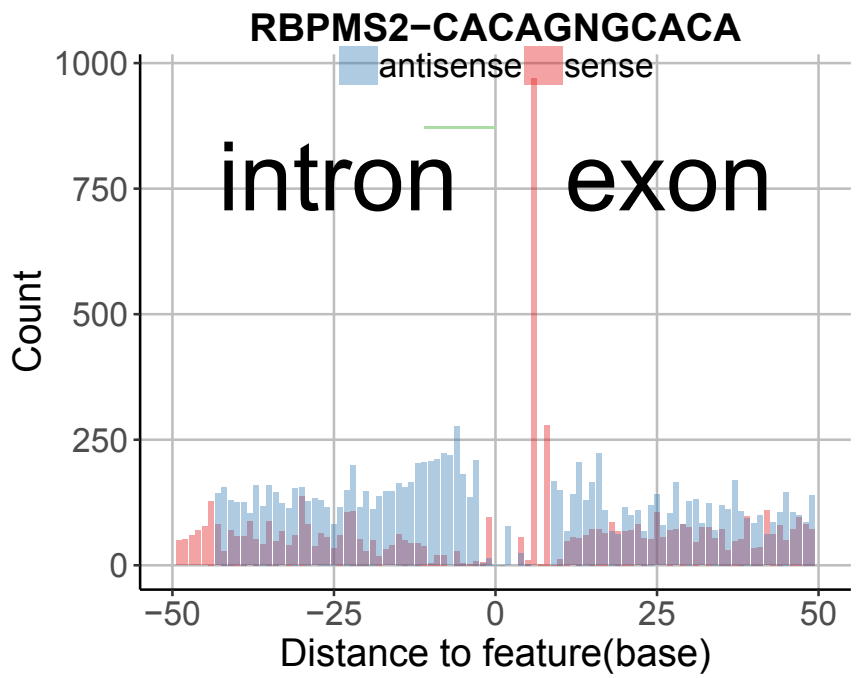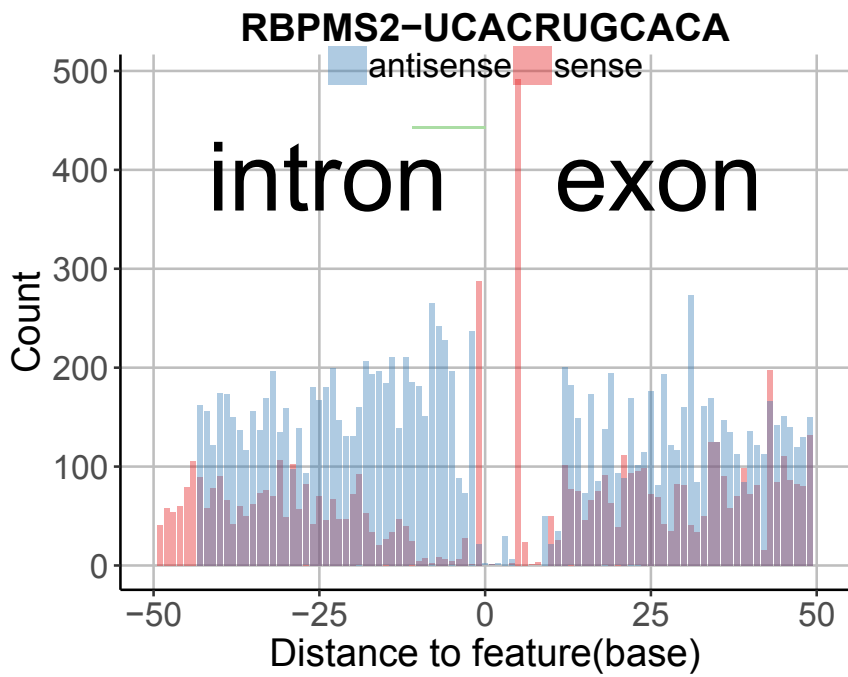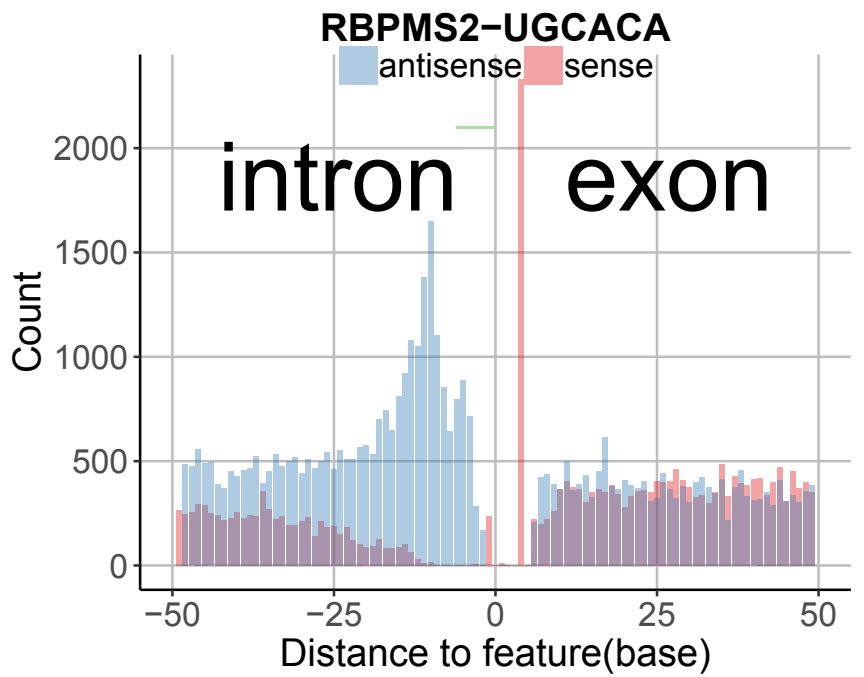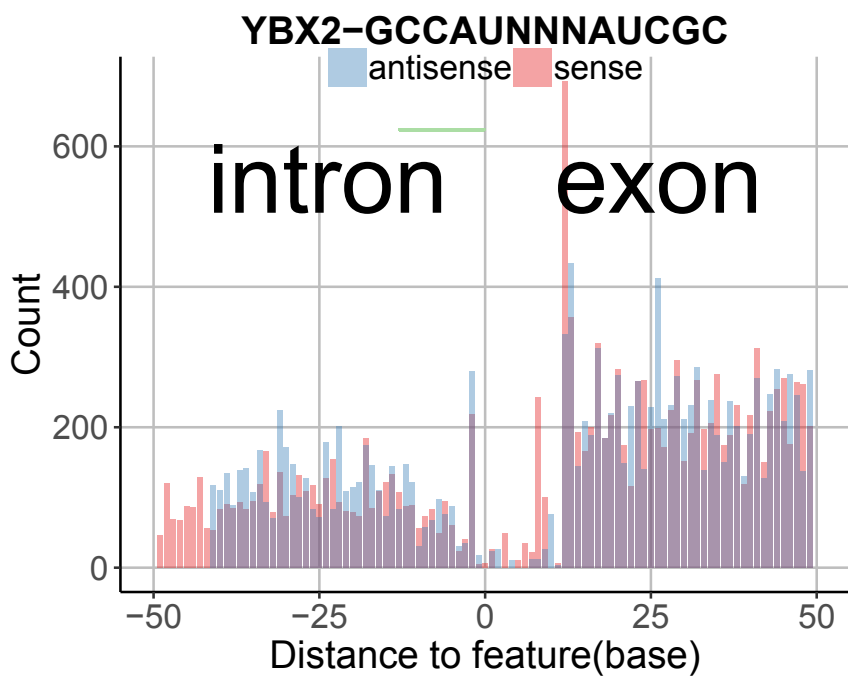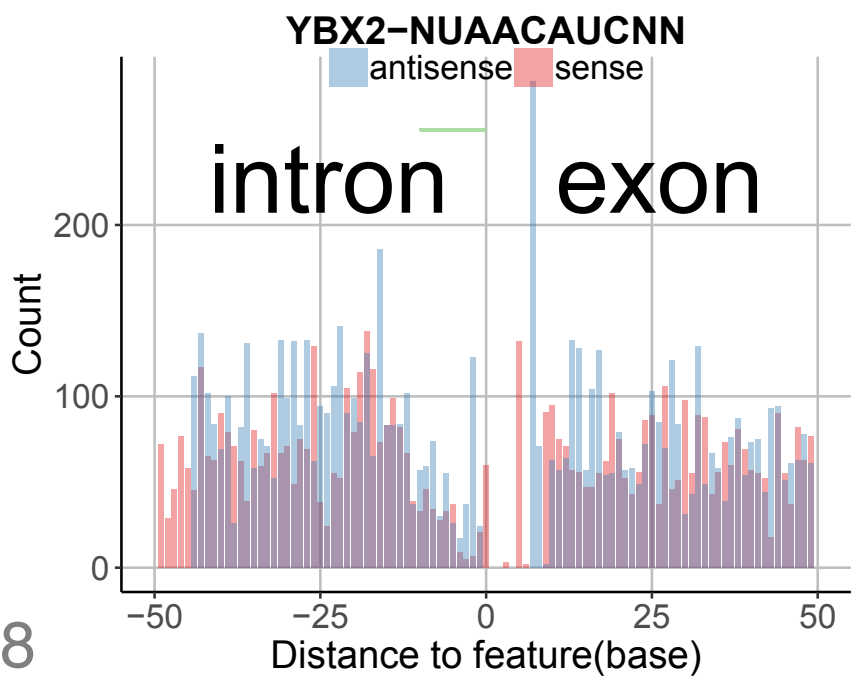

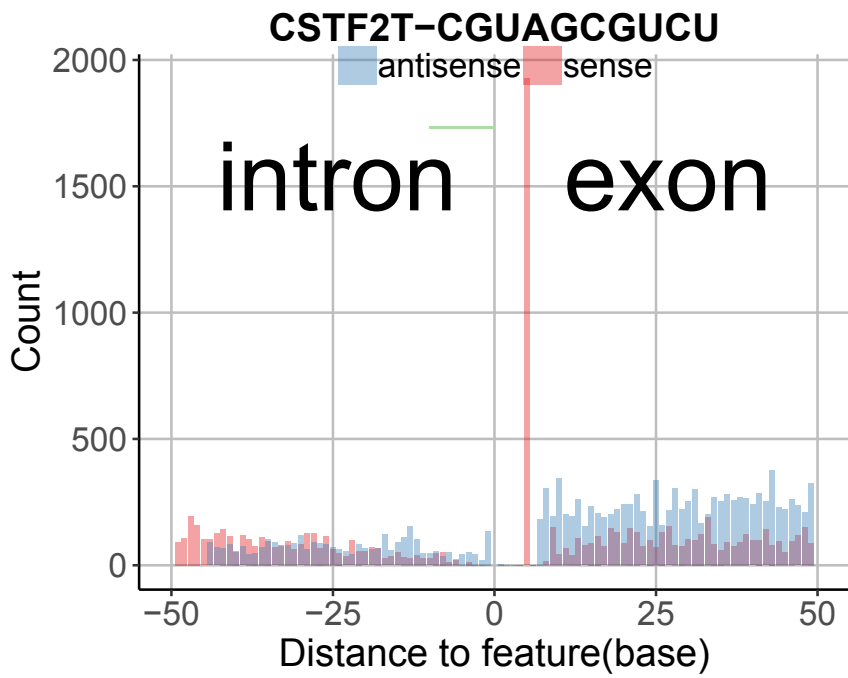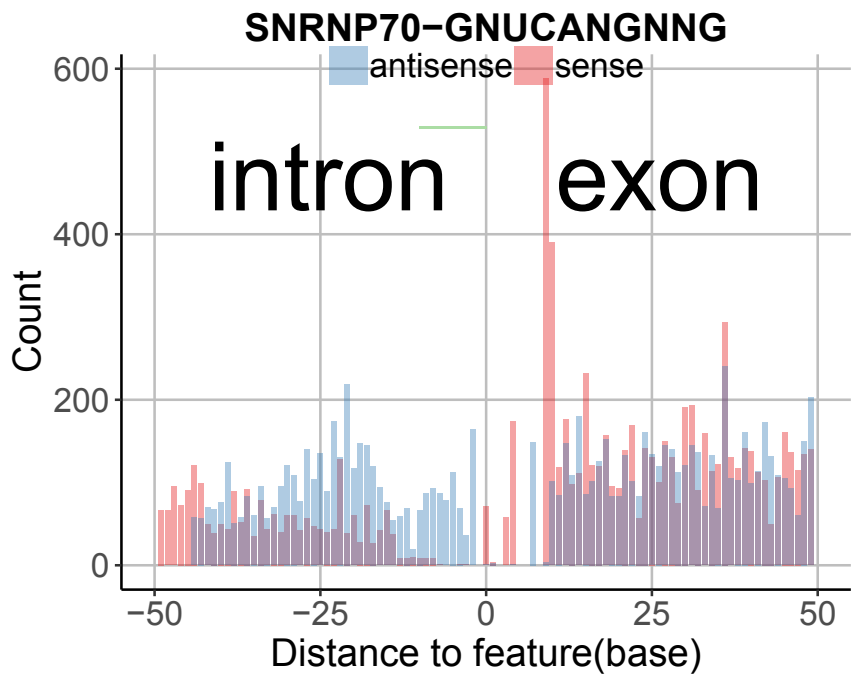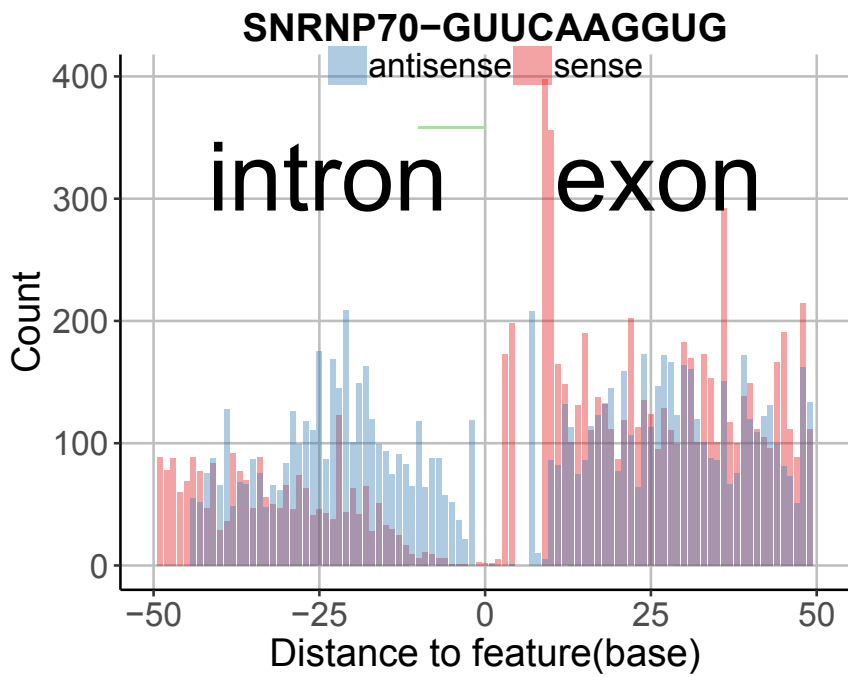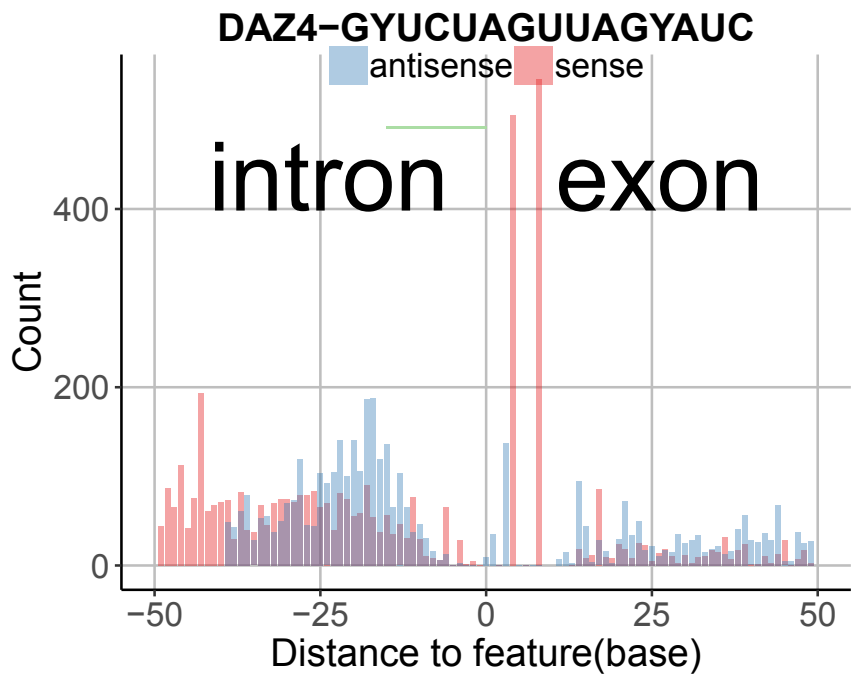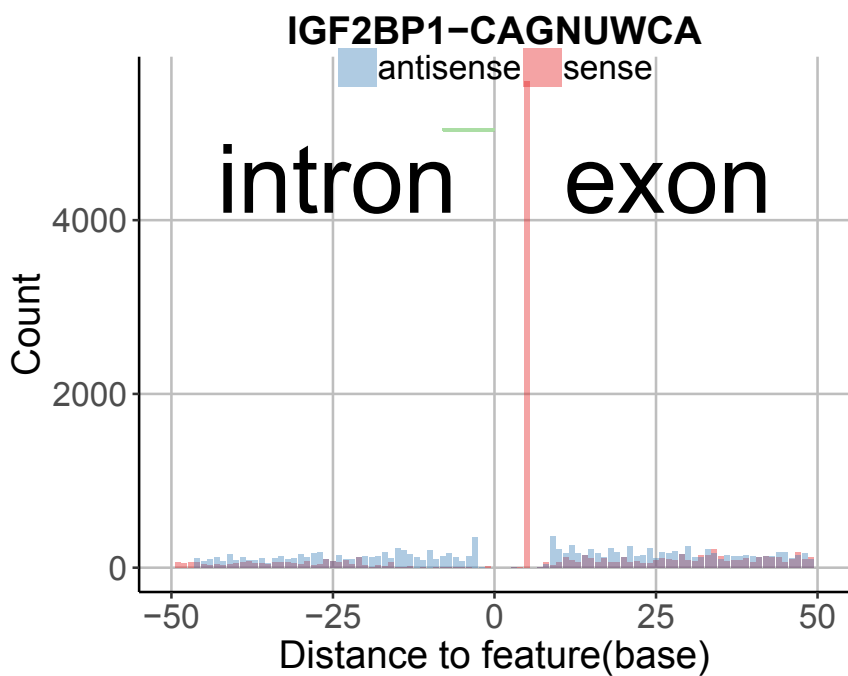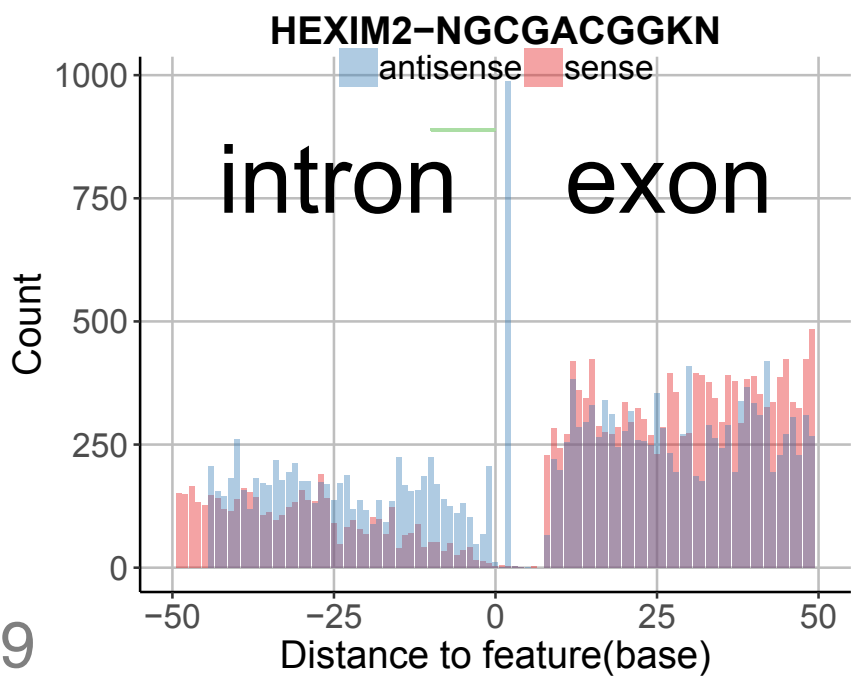

9

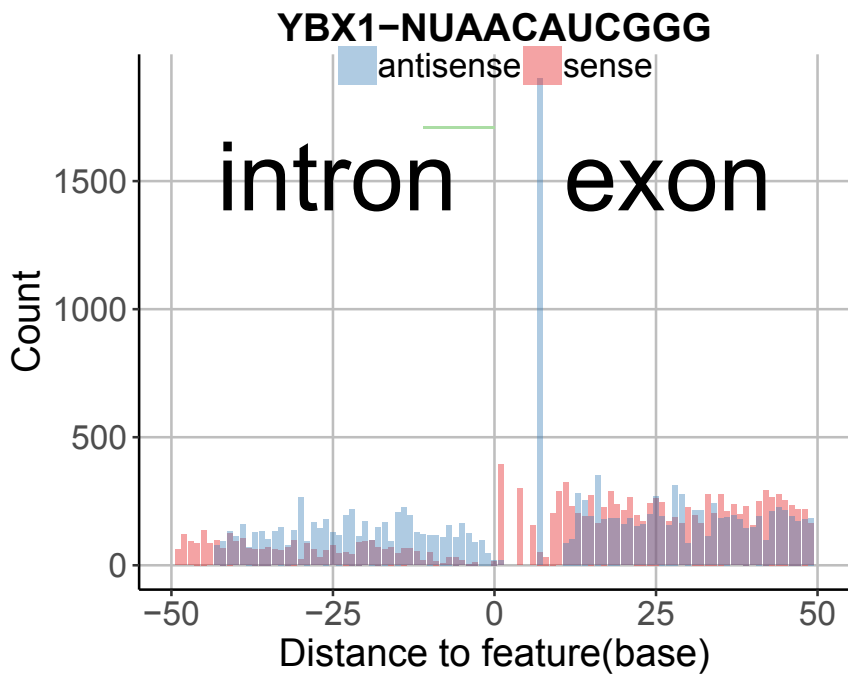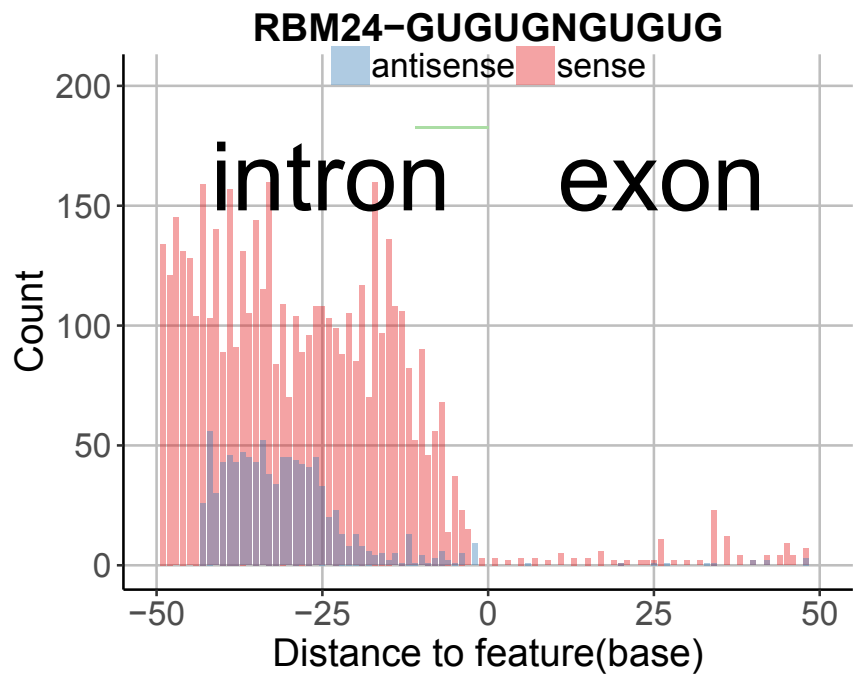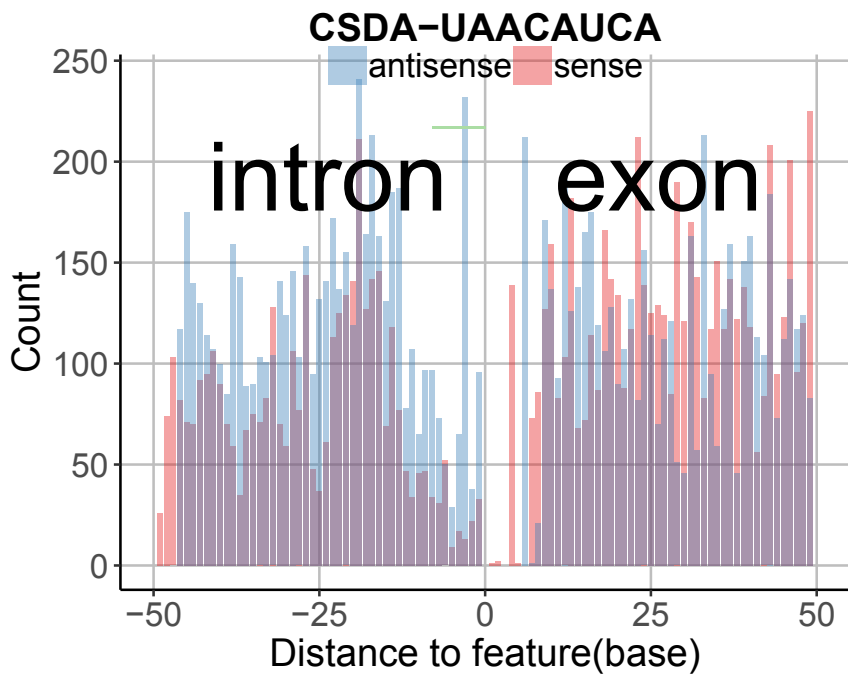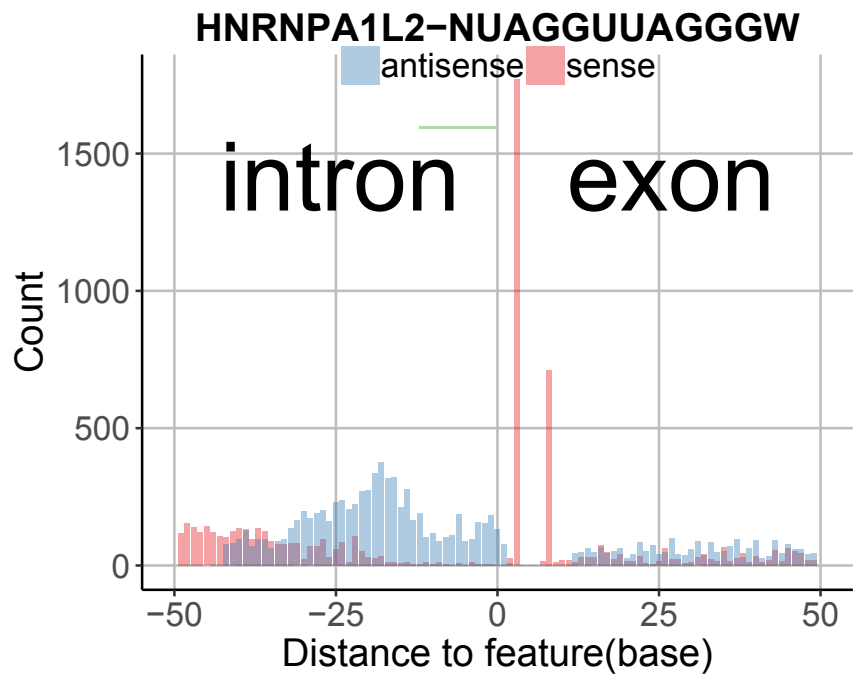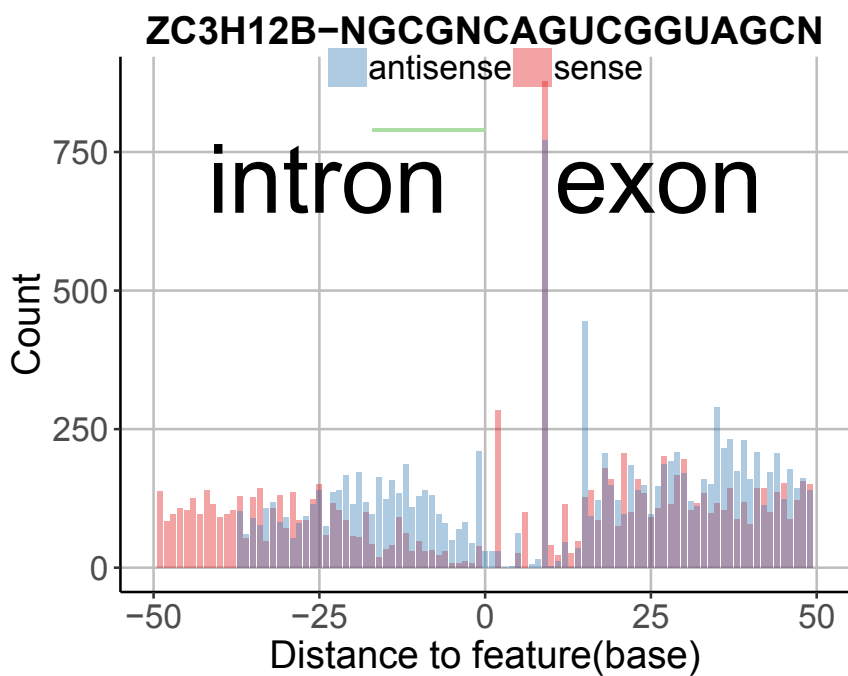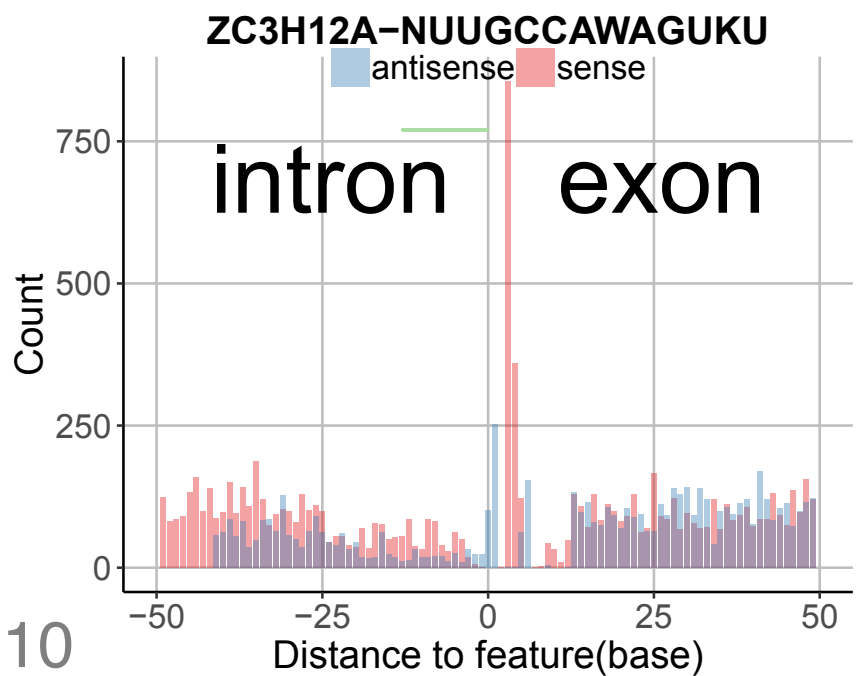

10

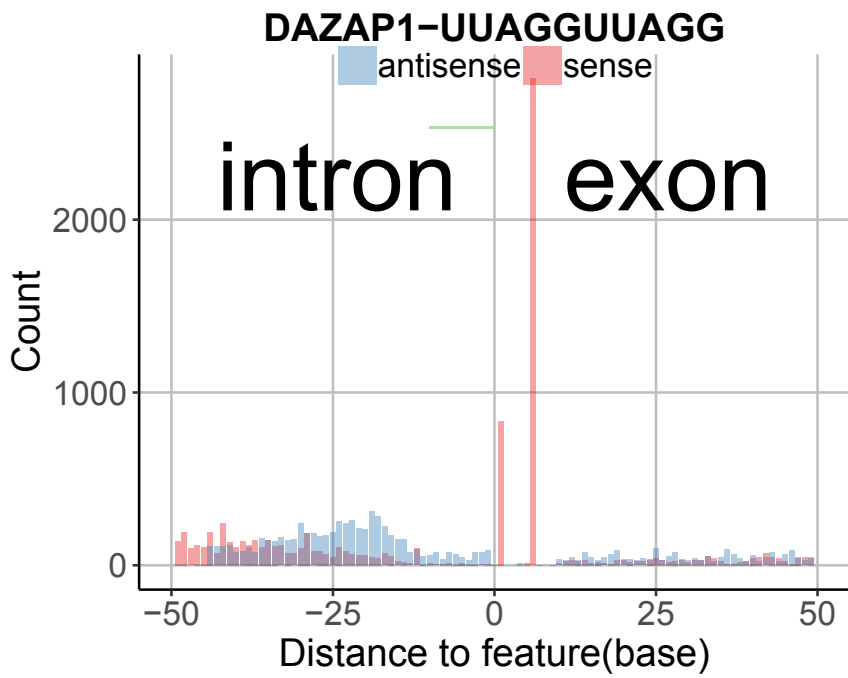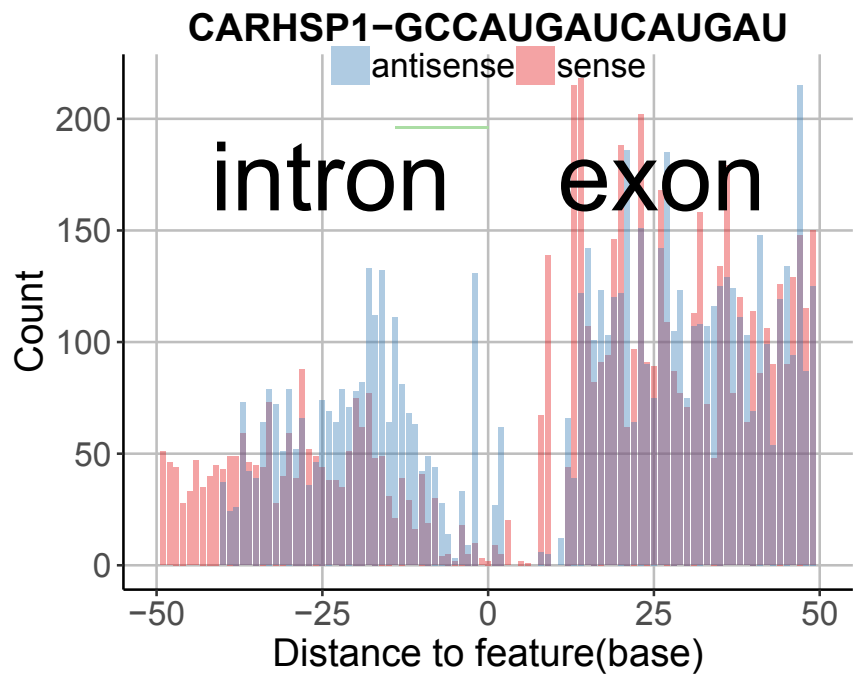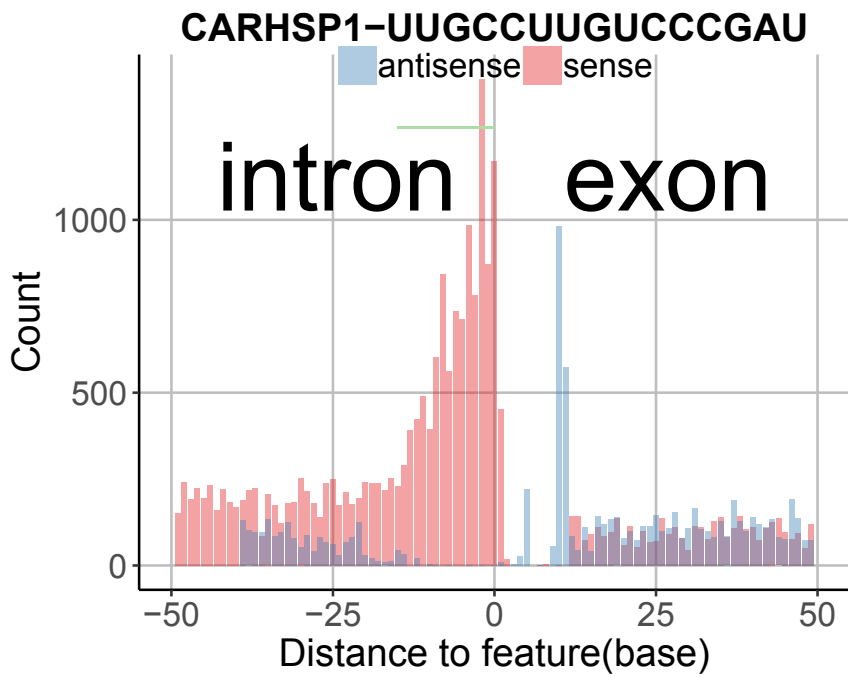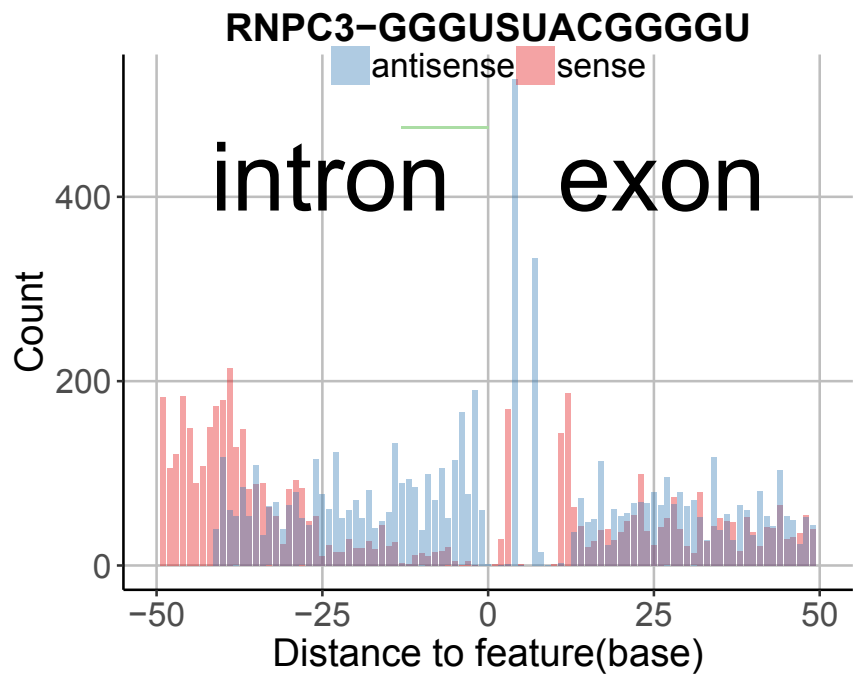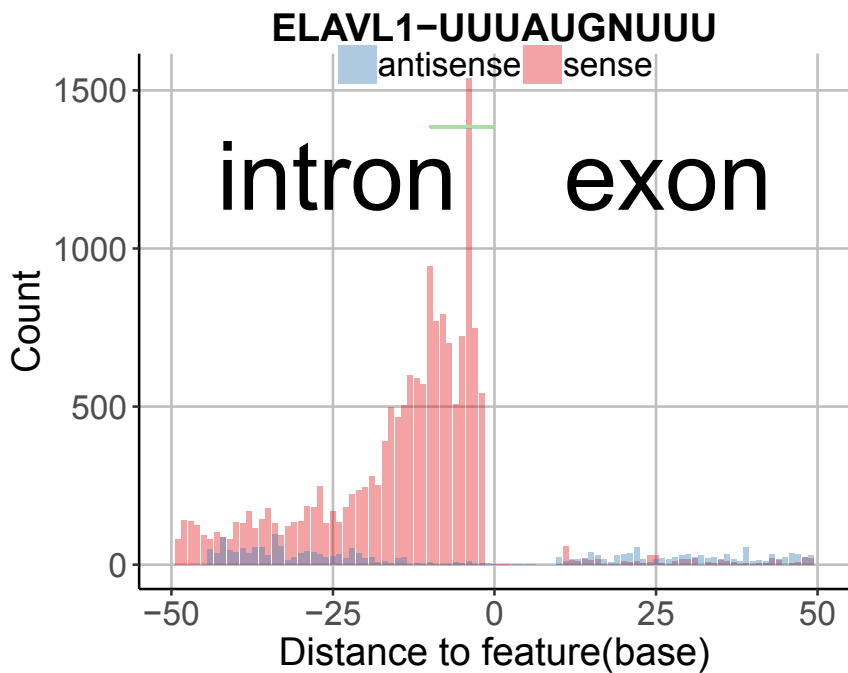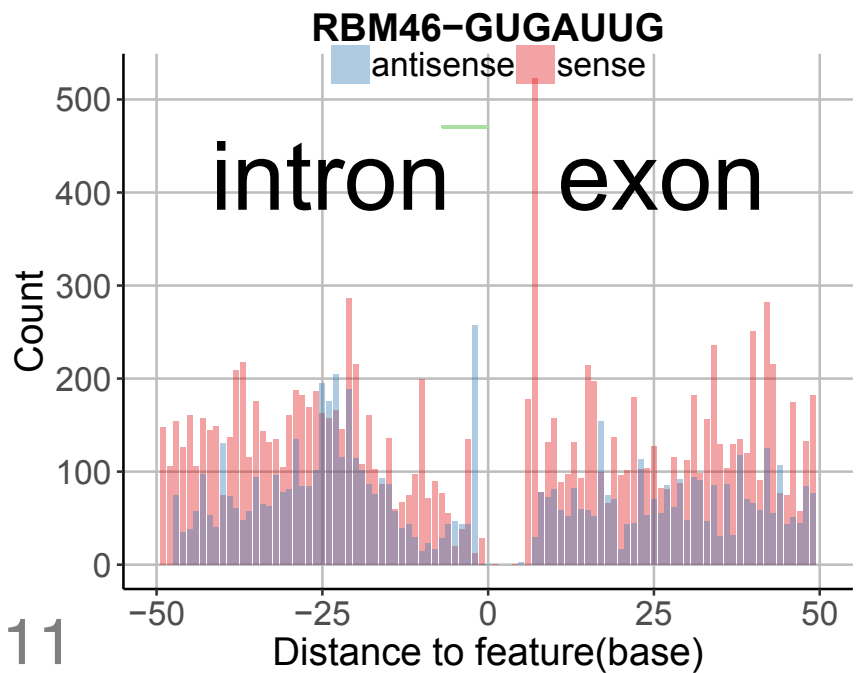

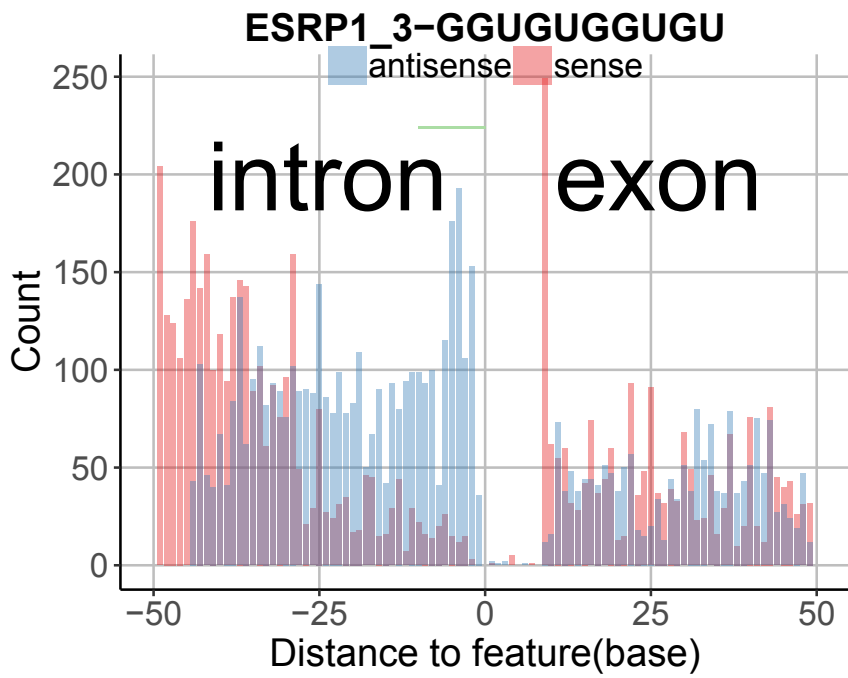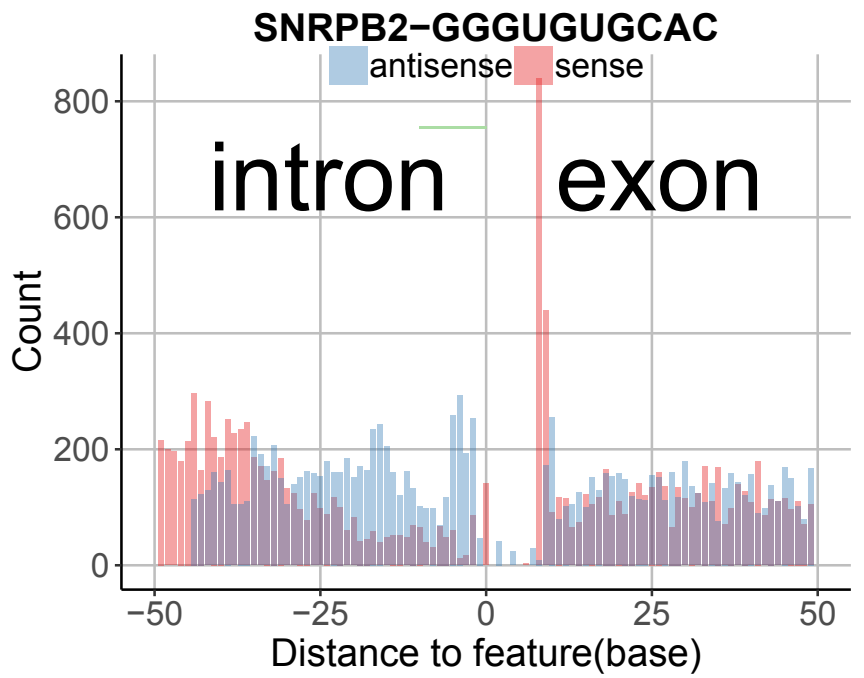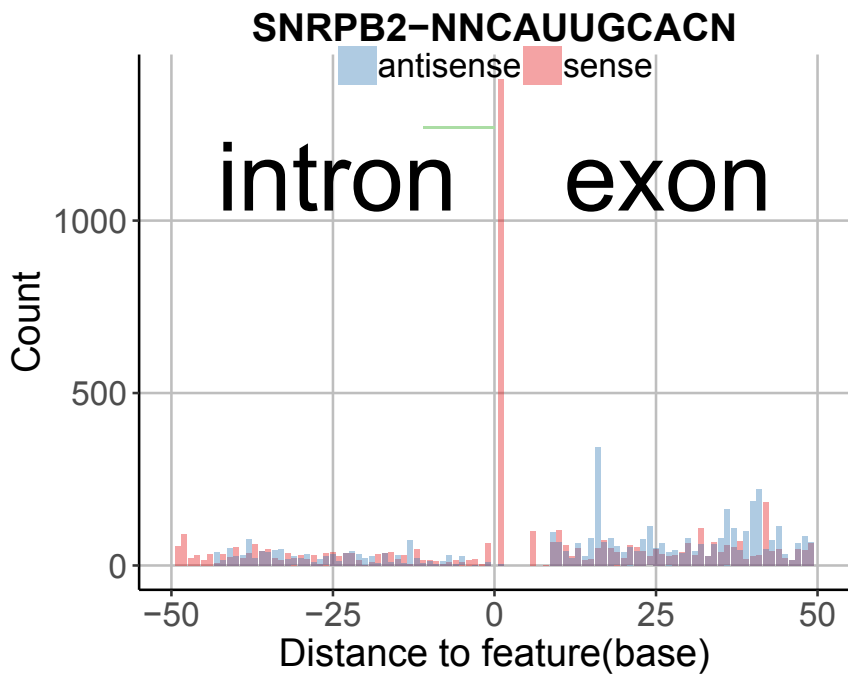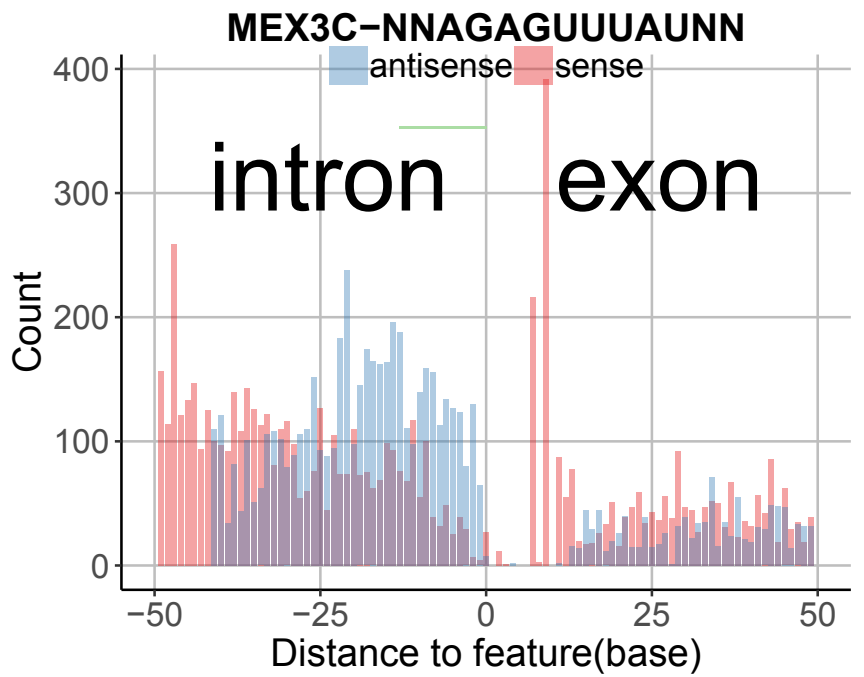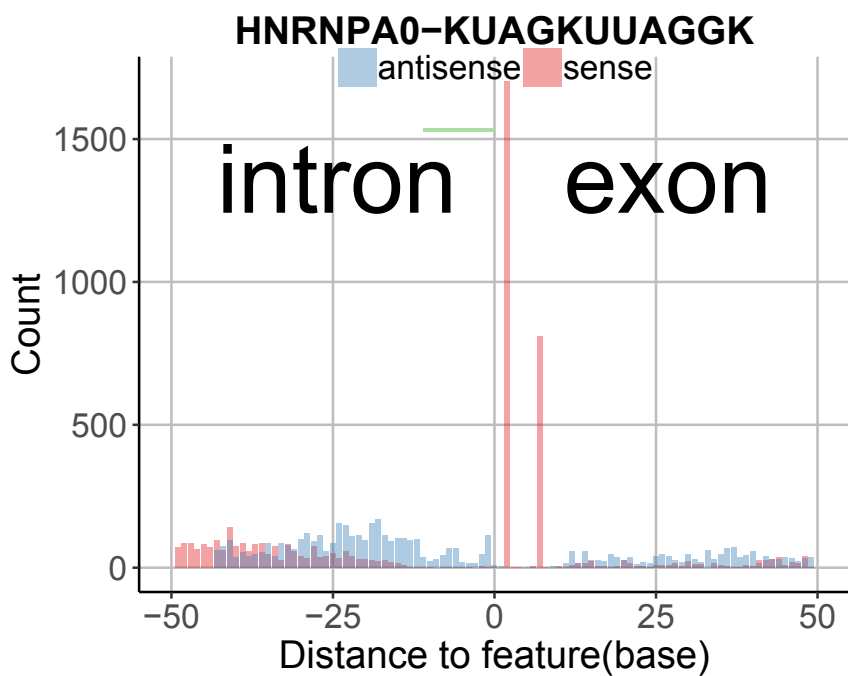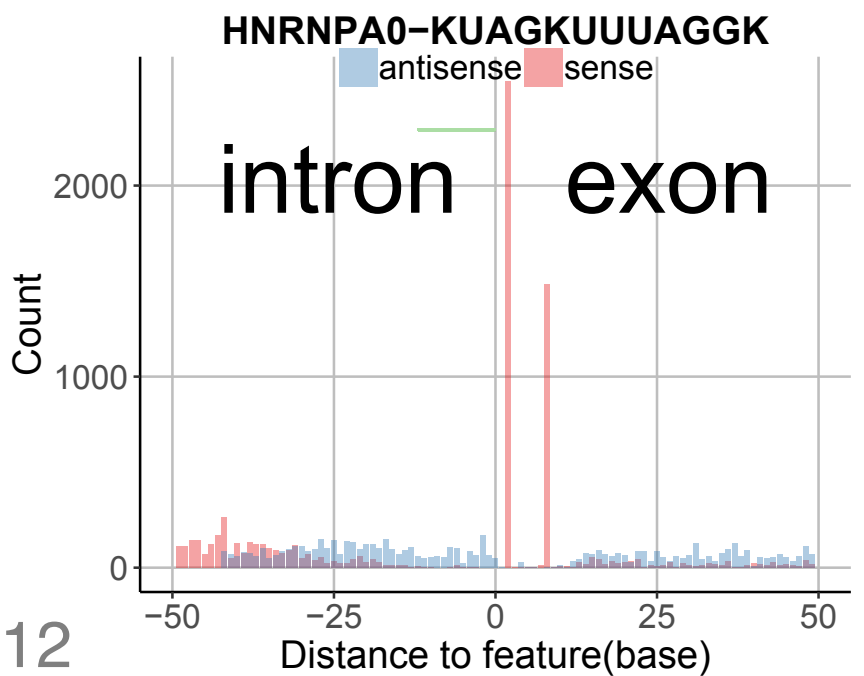

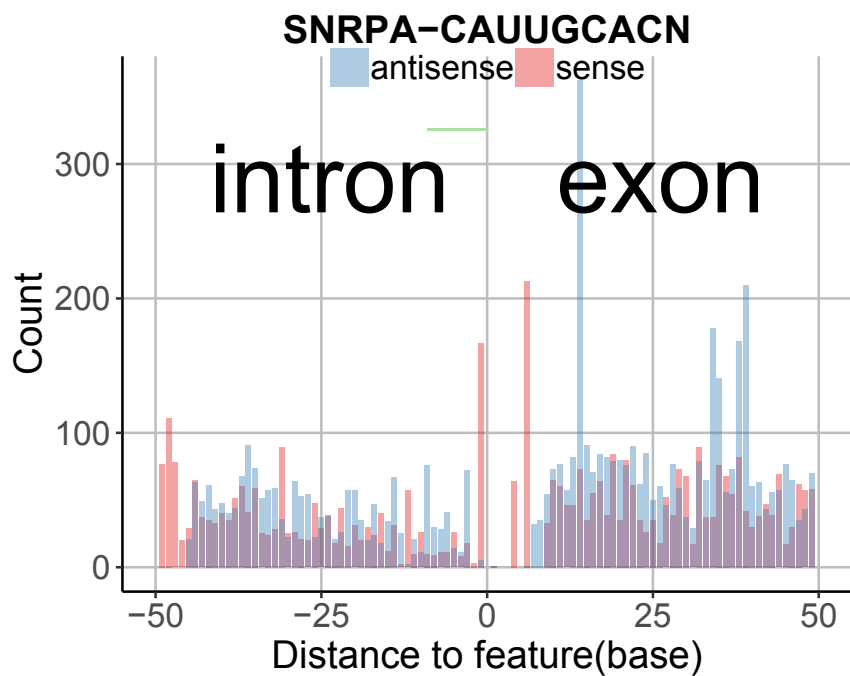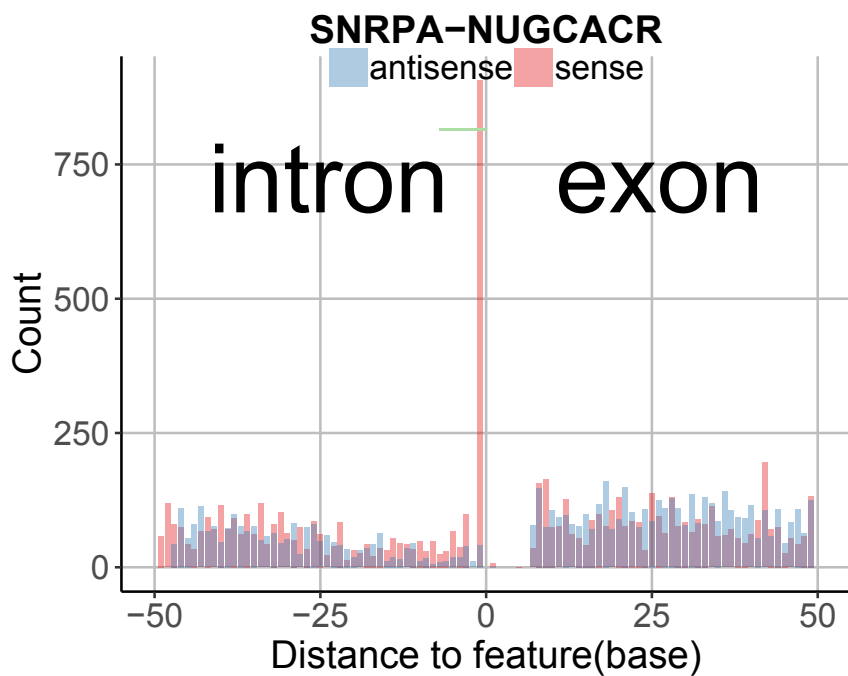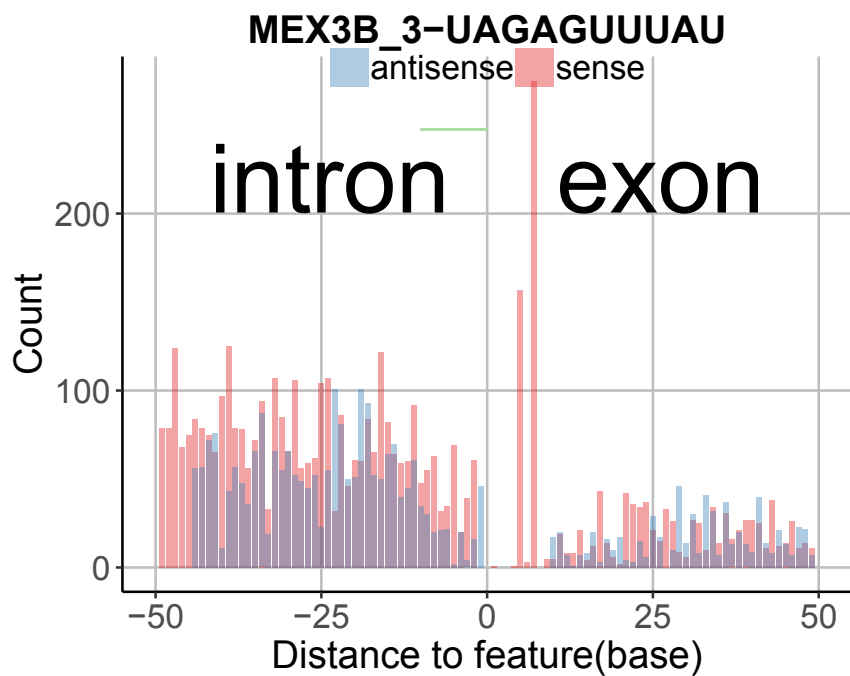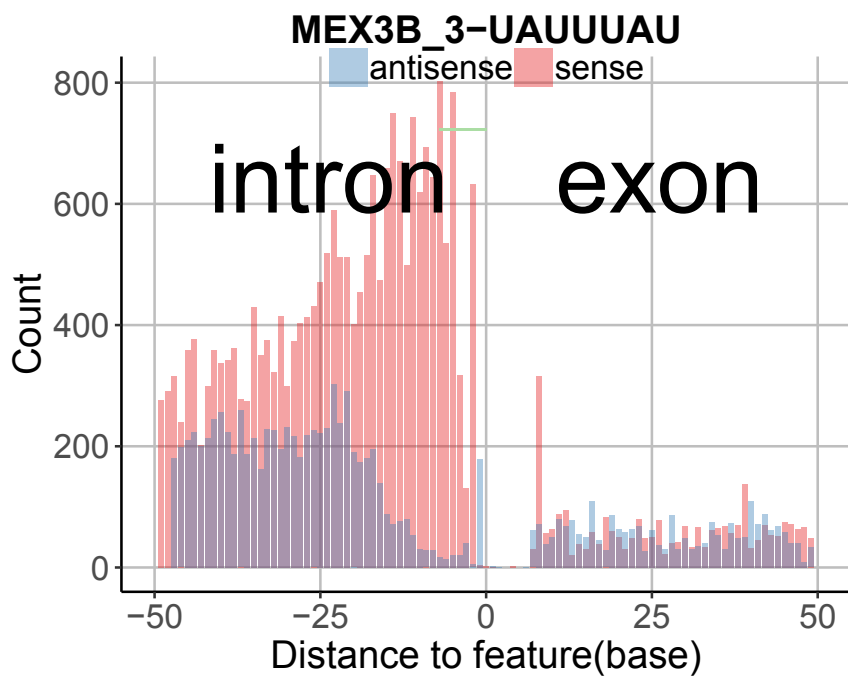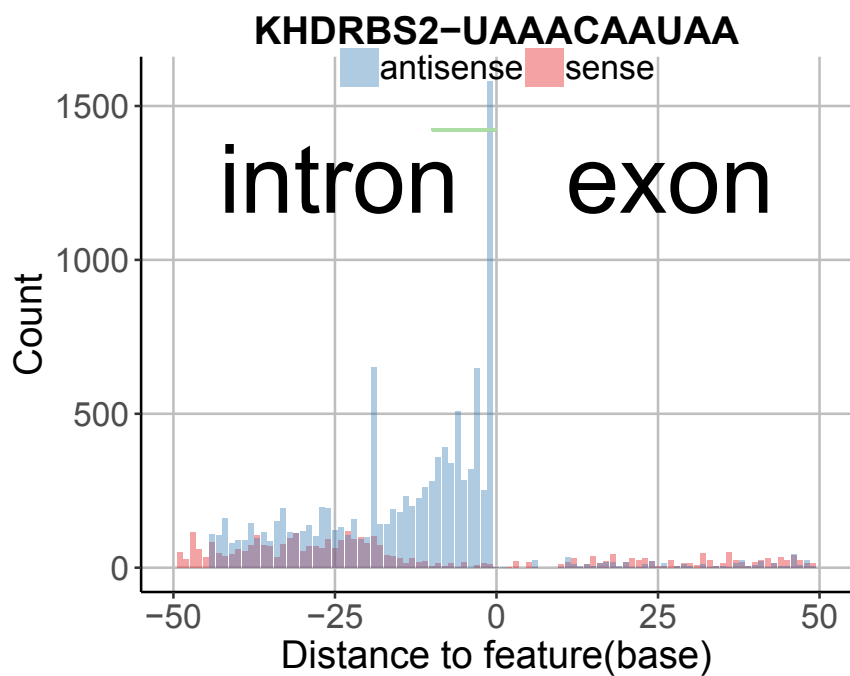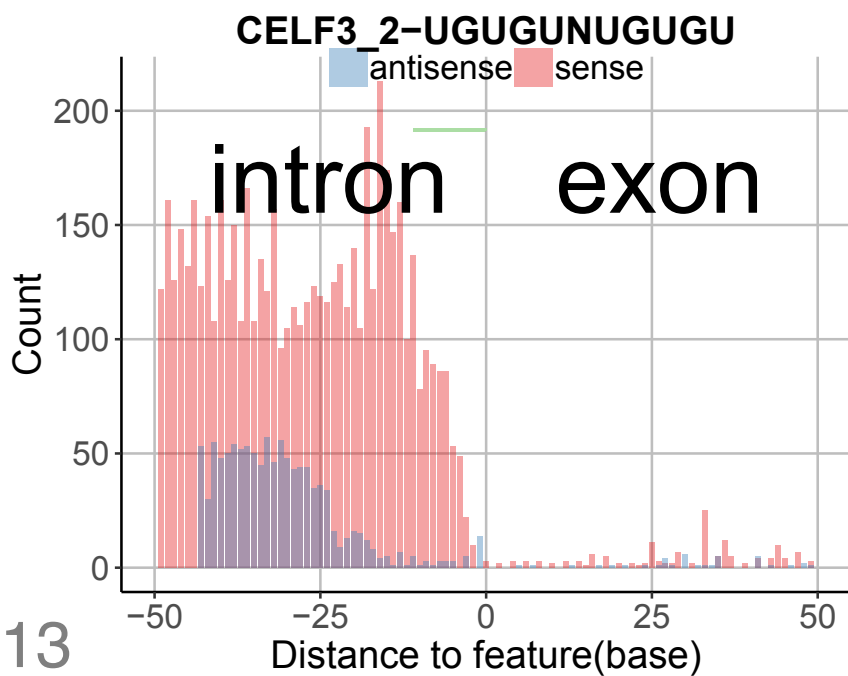

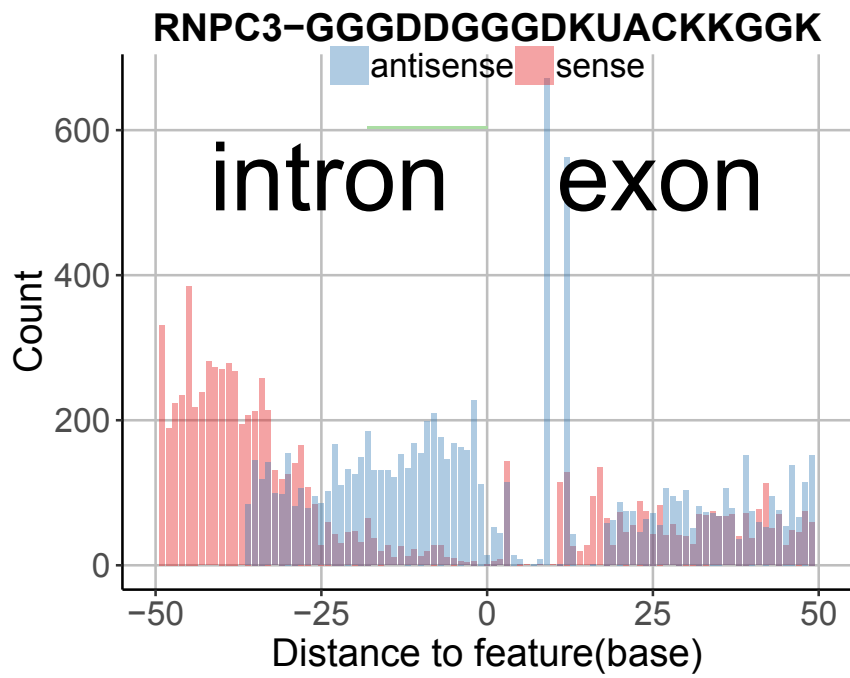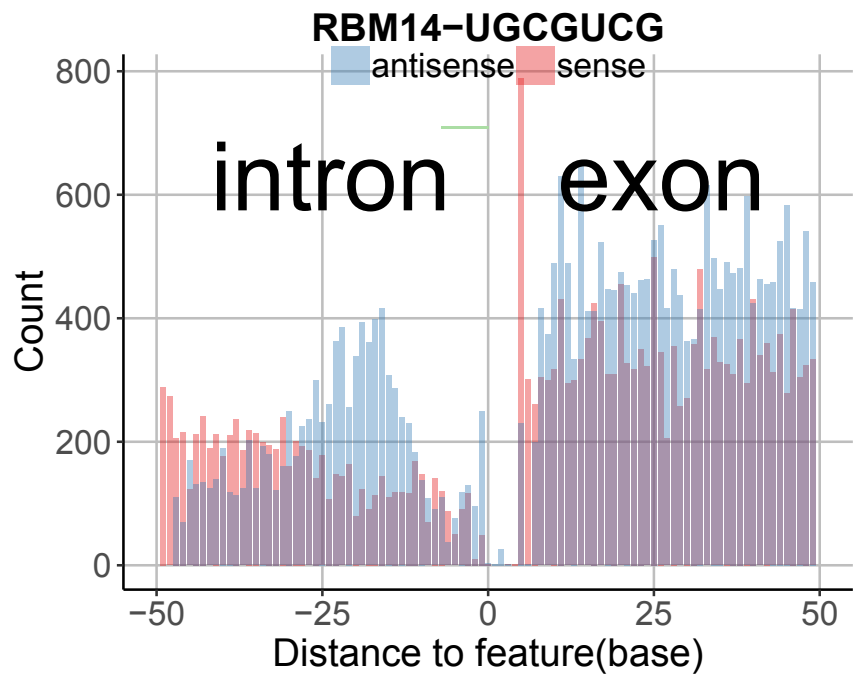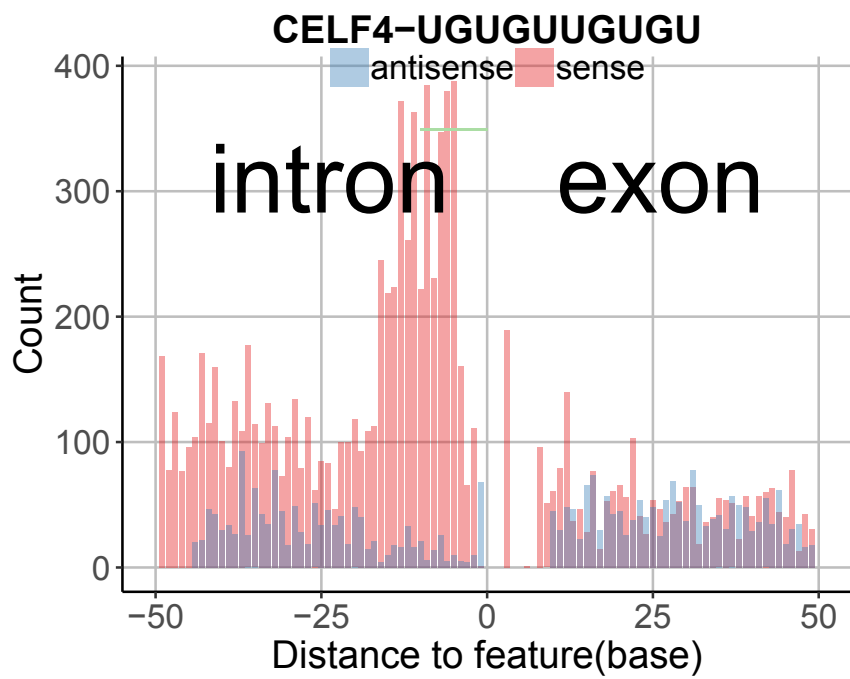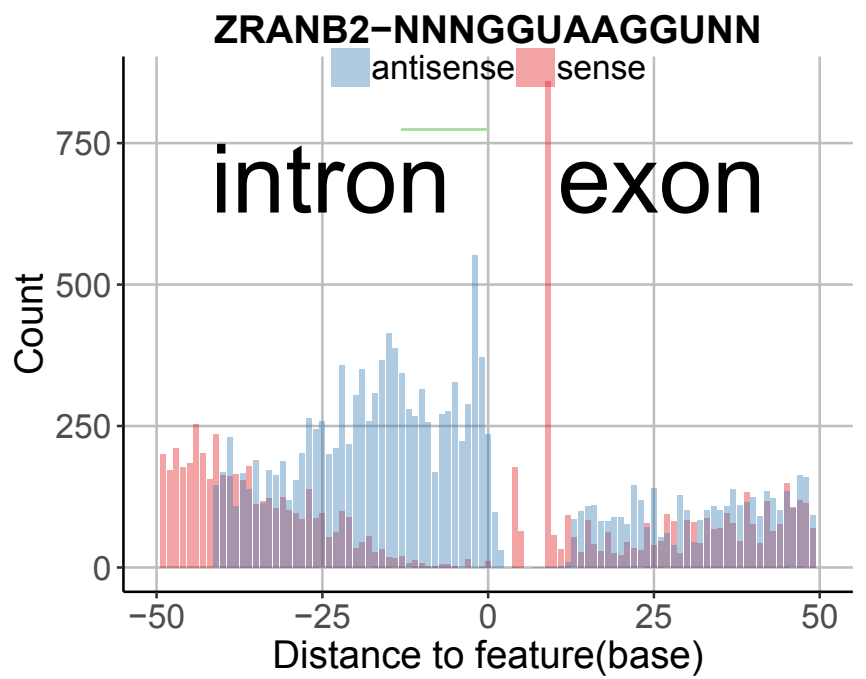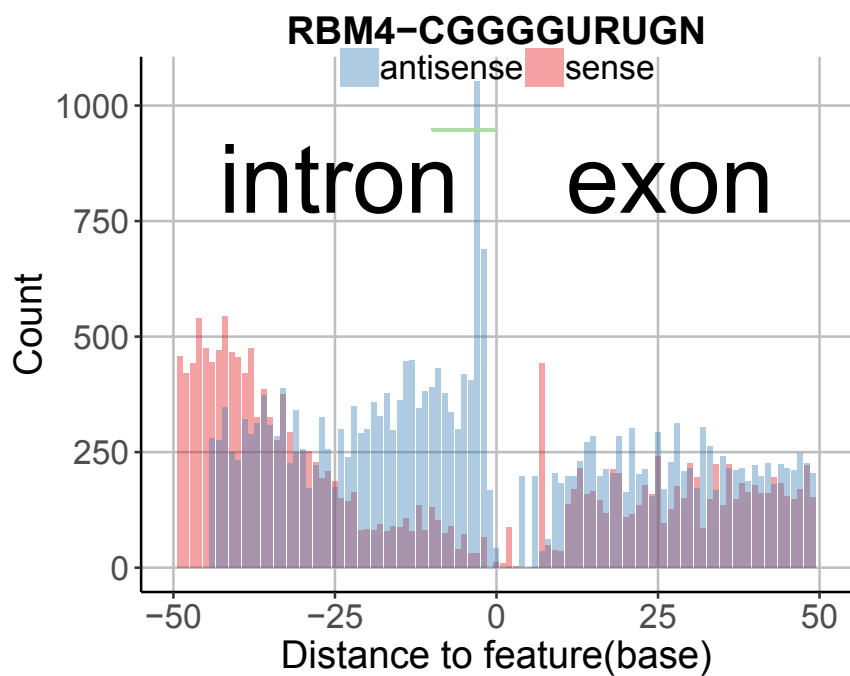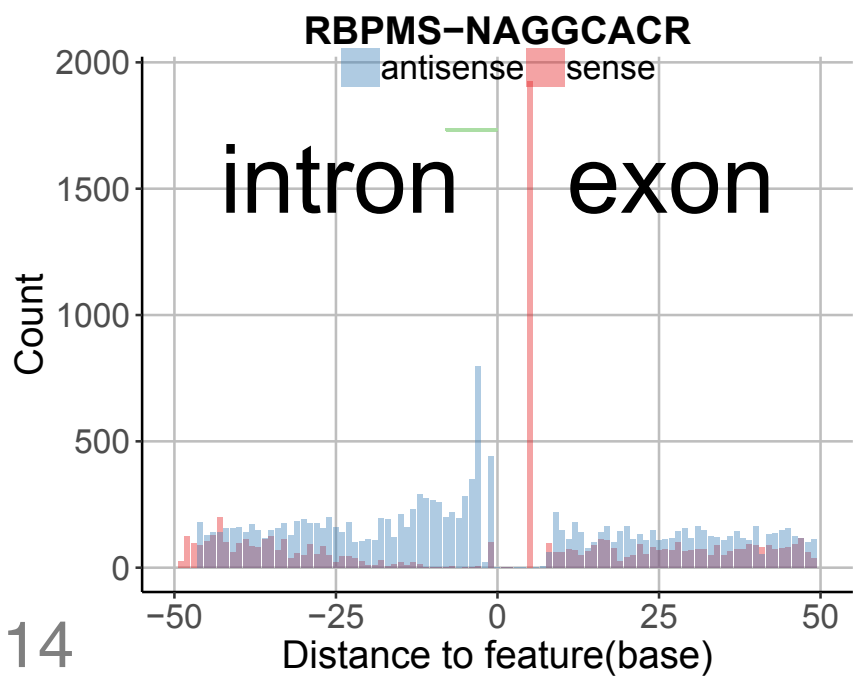

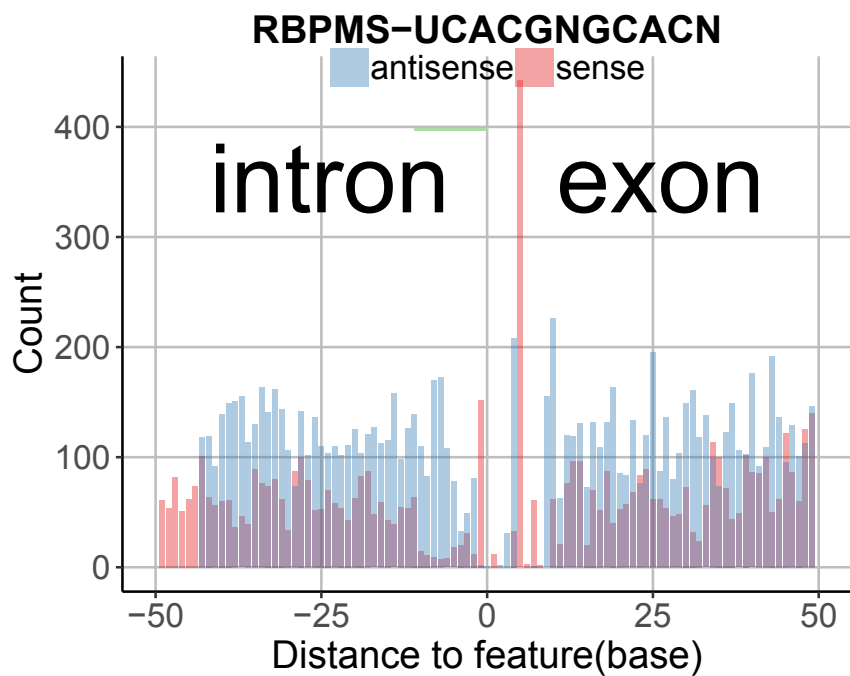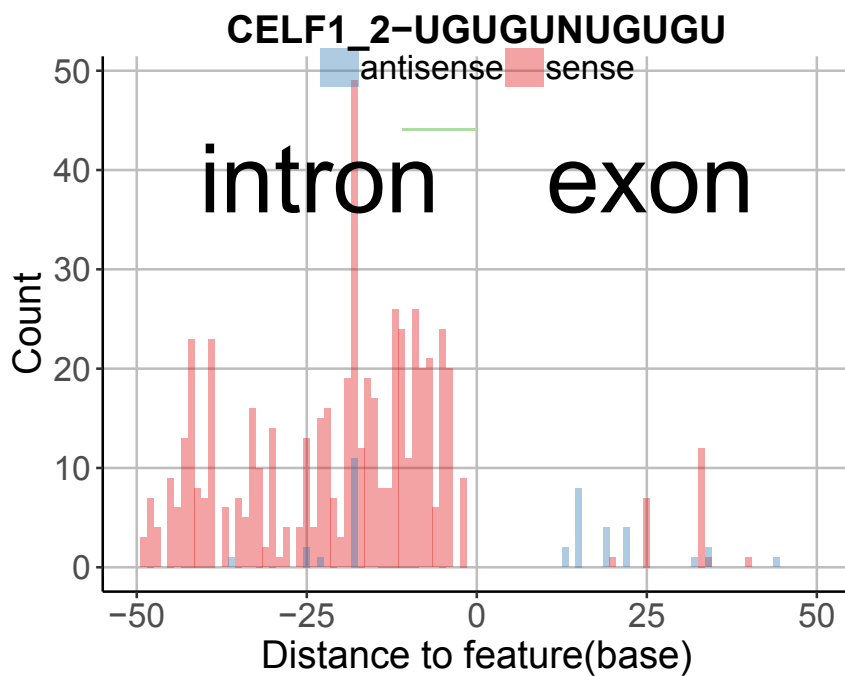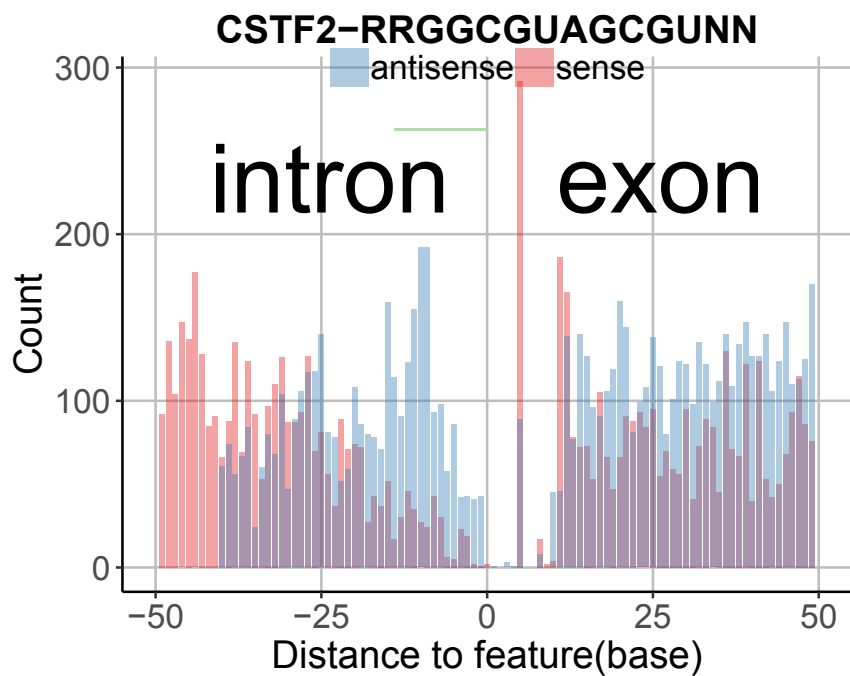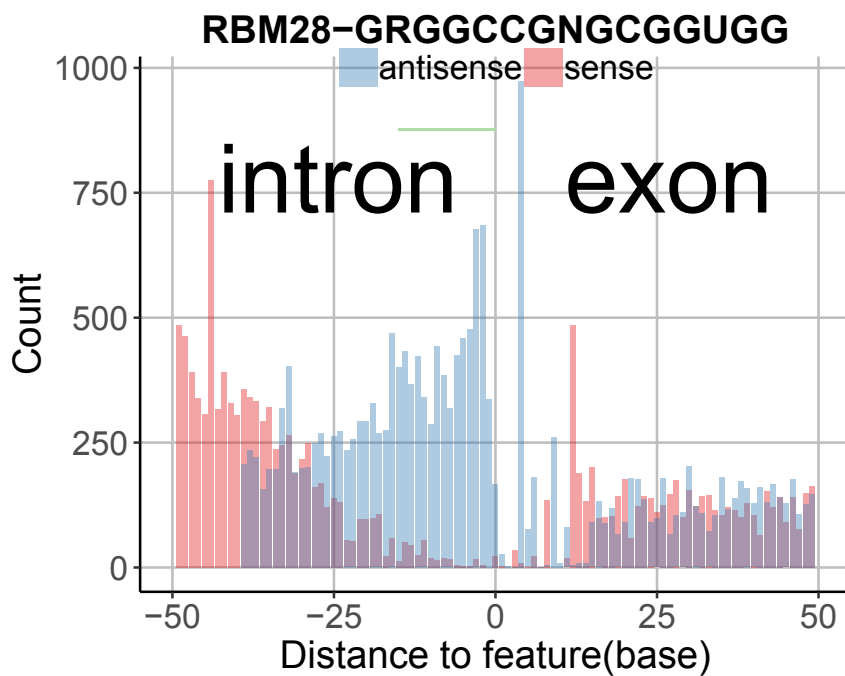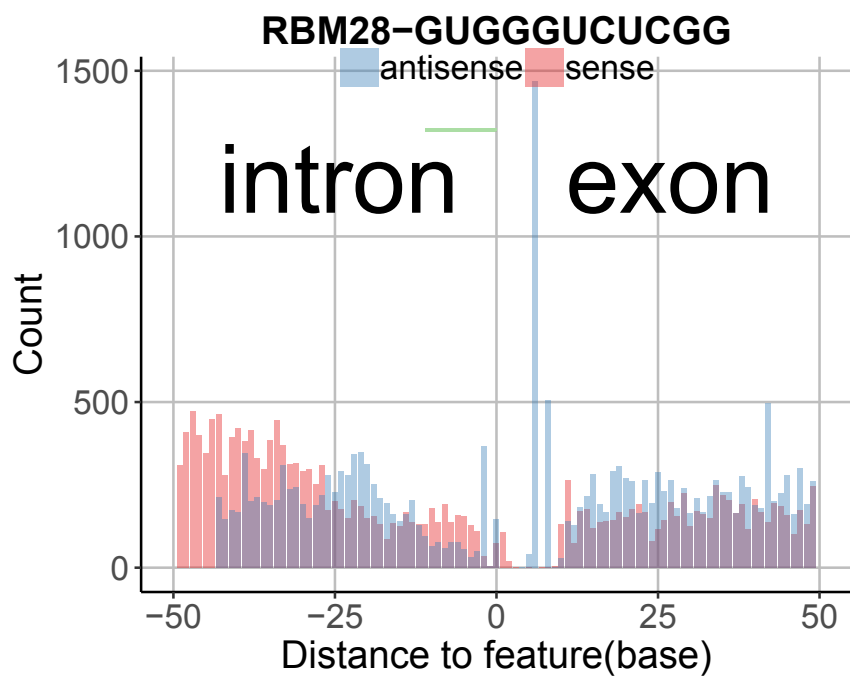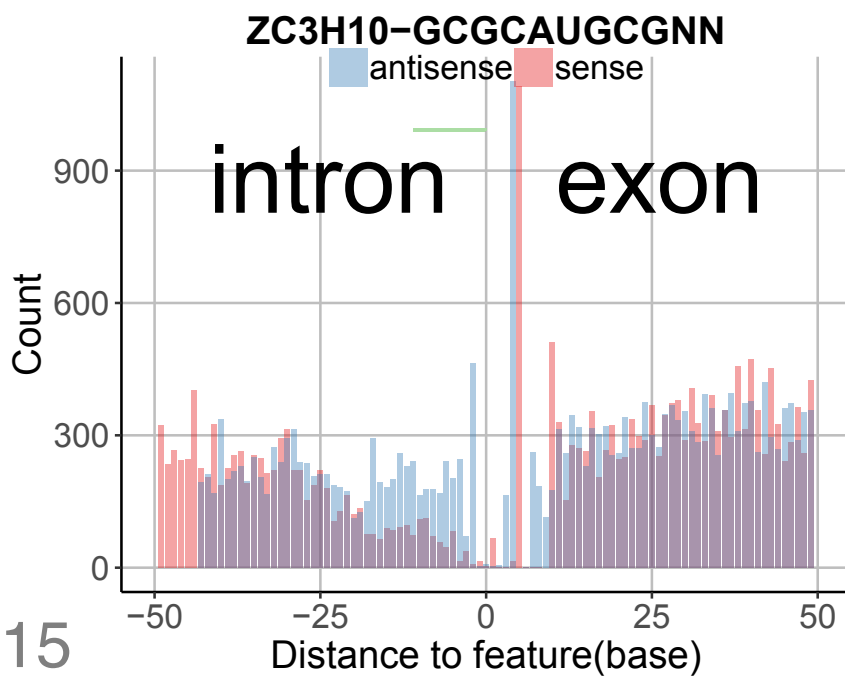



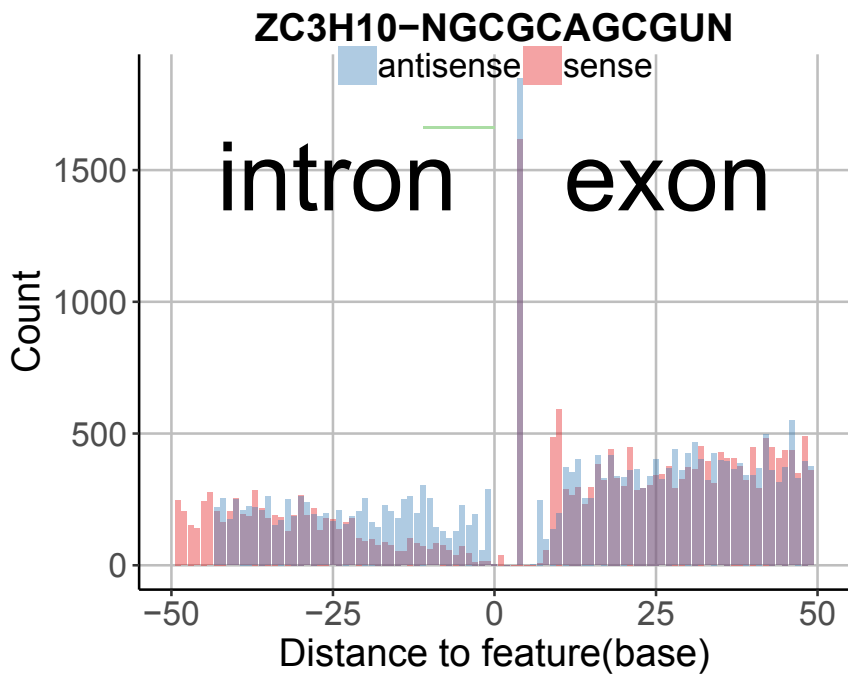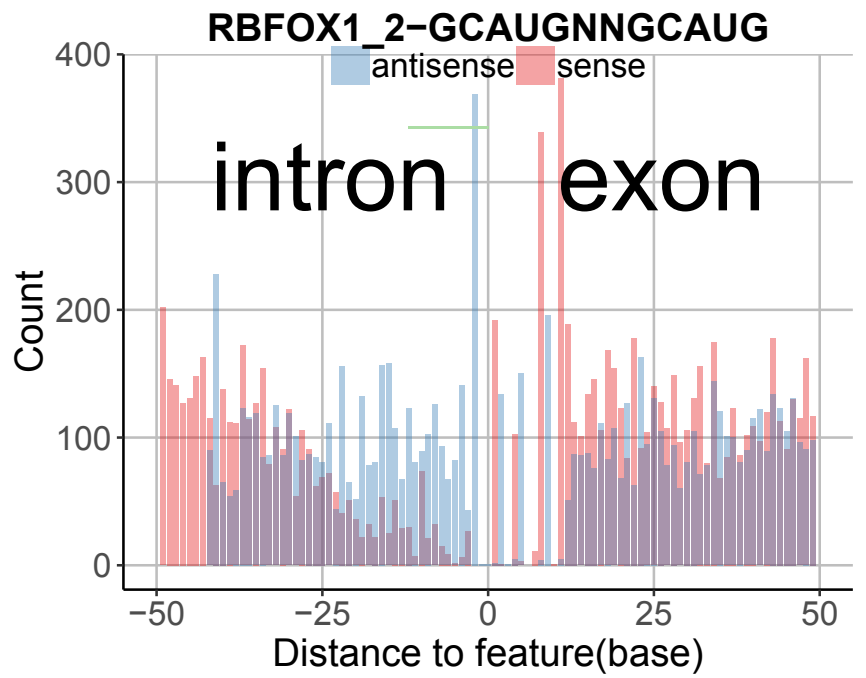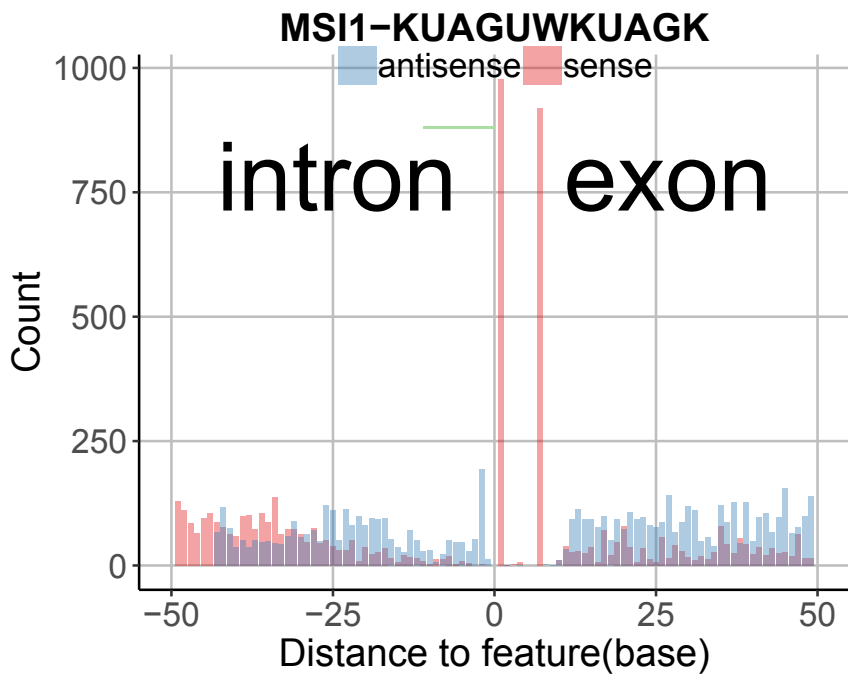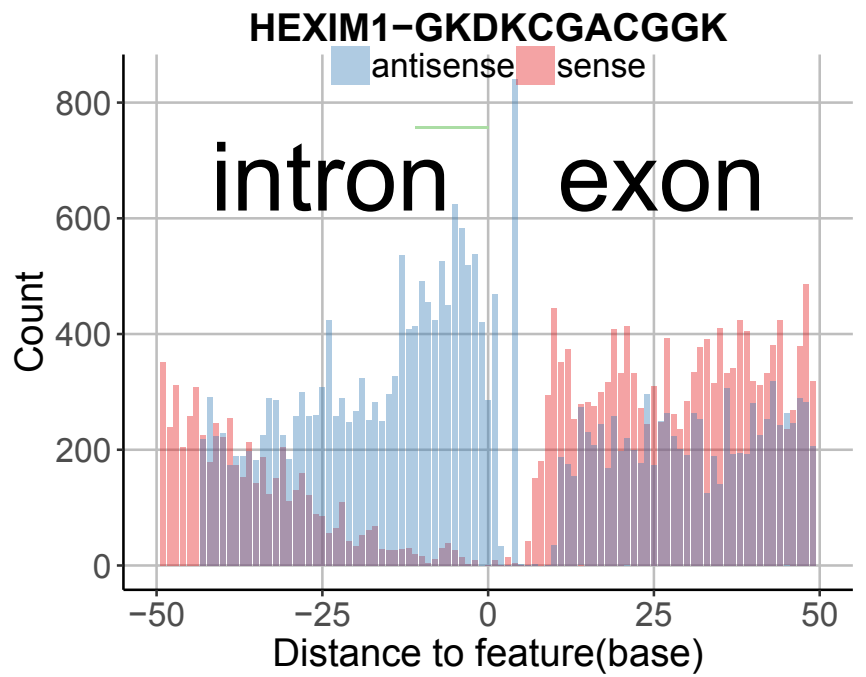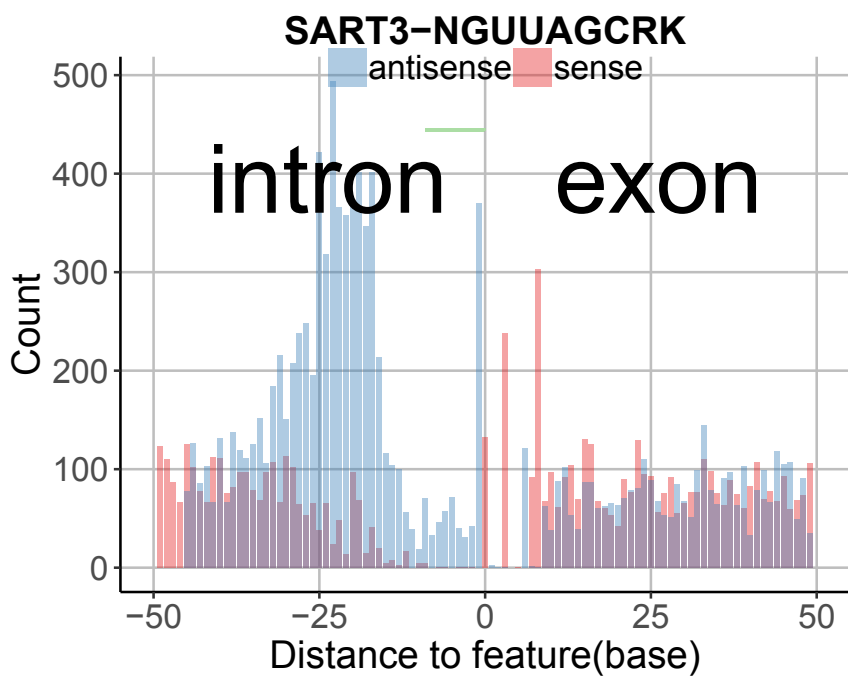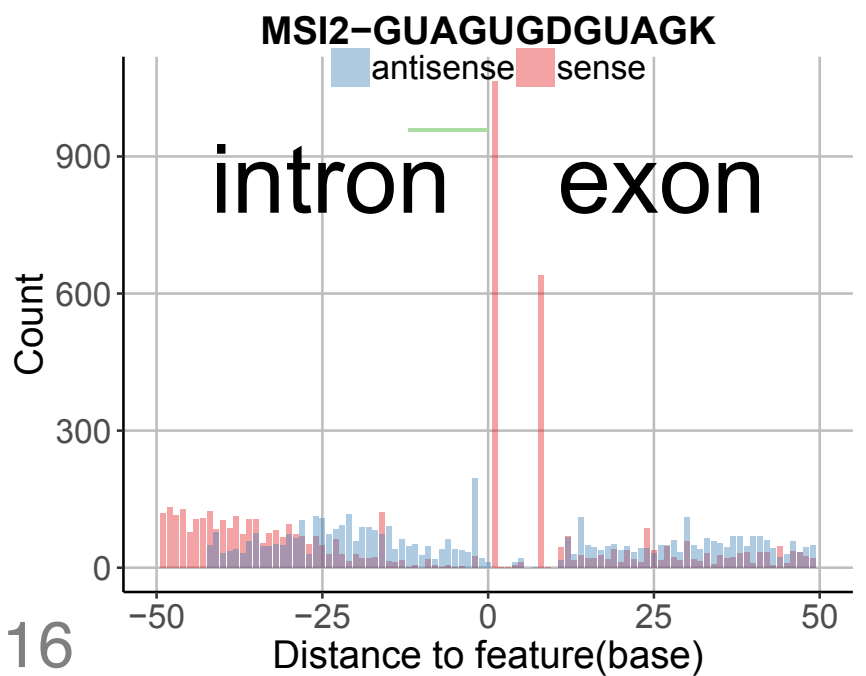

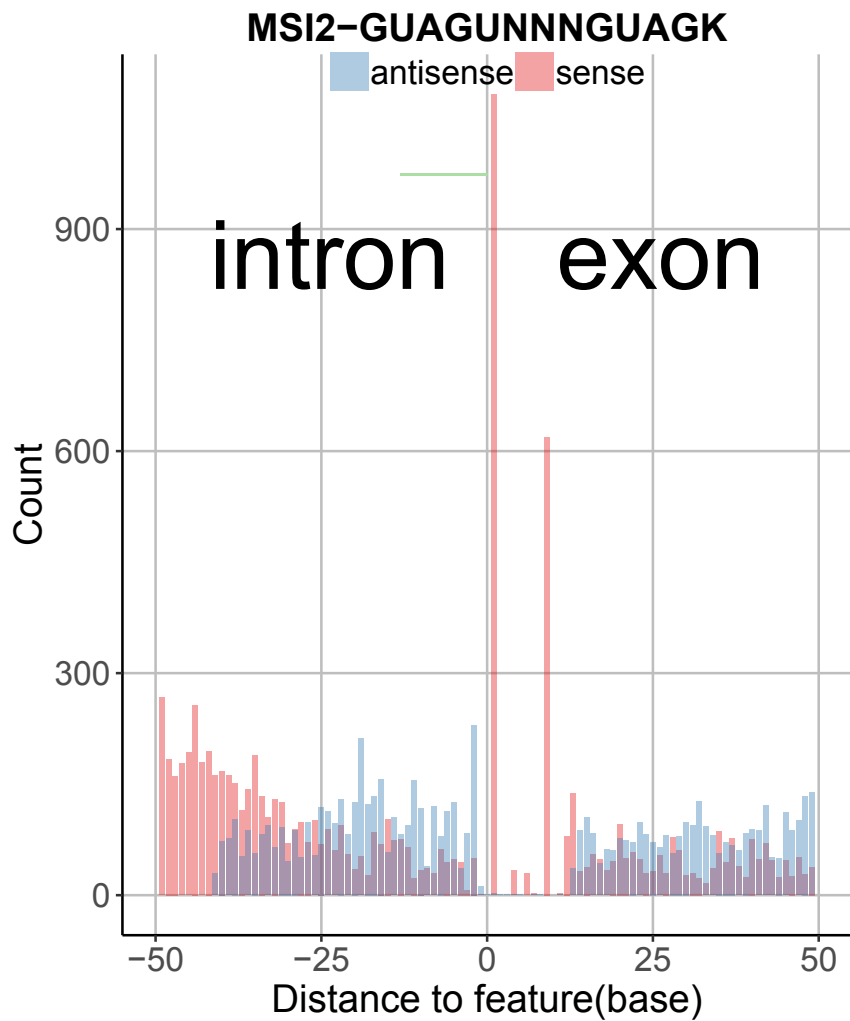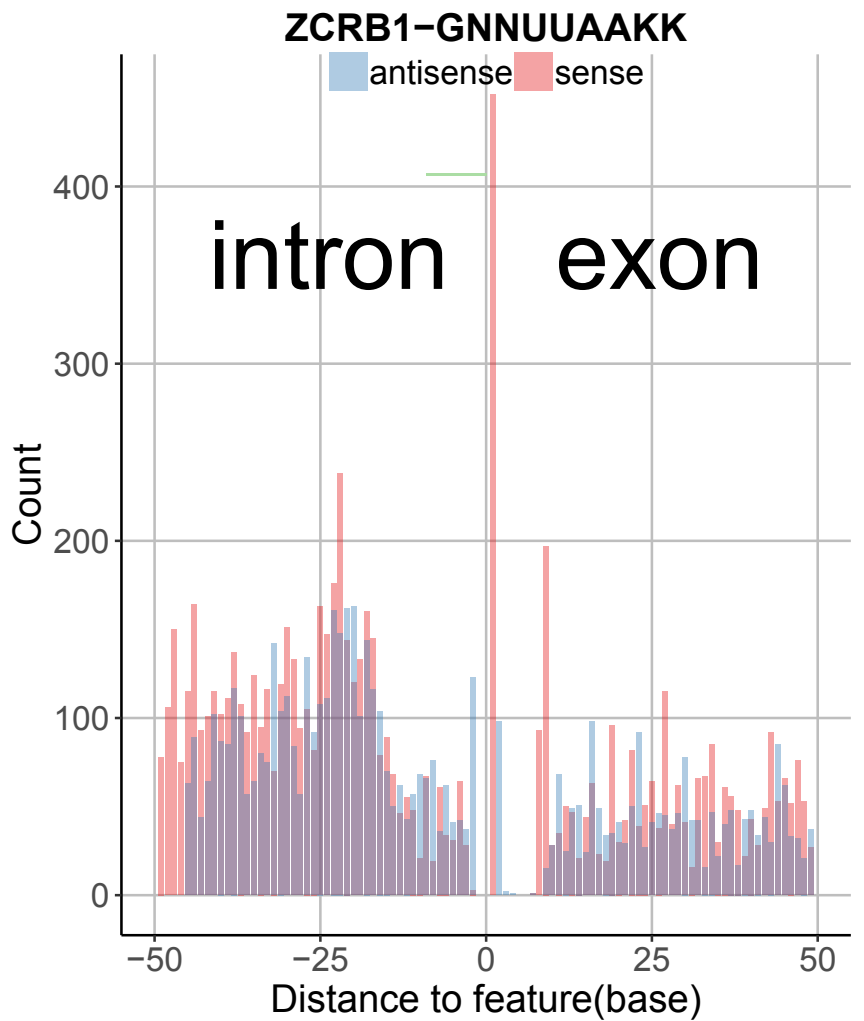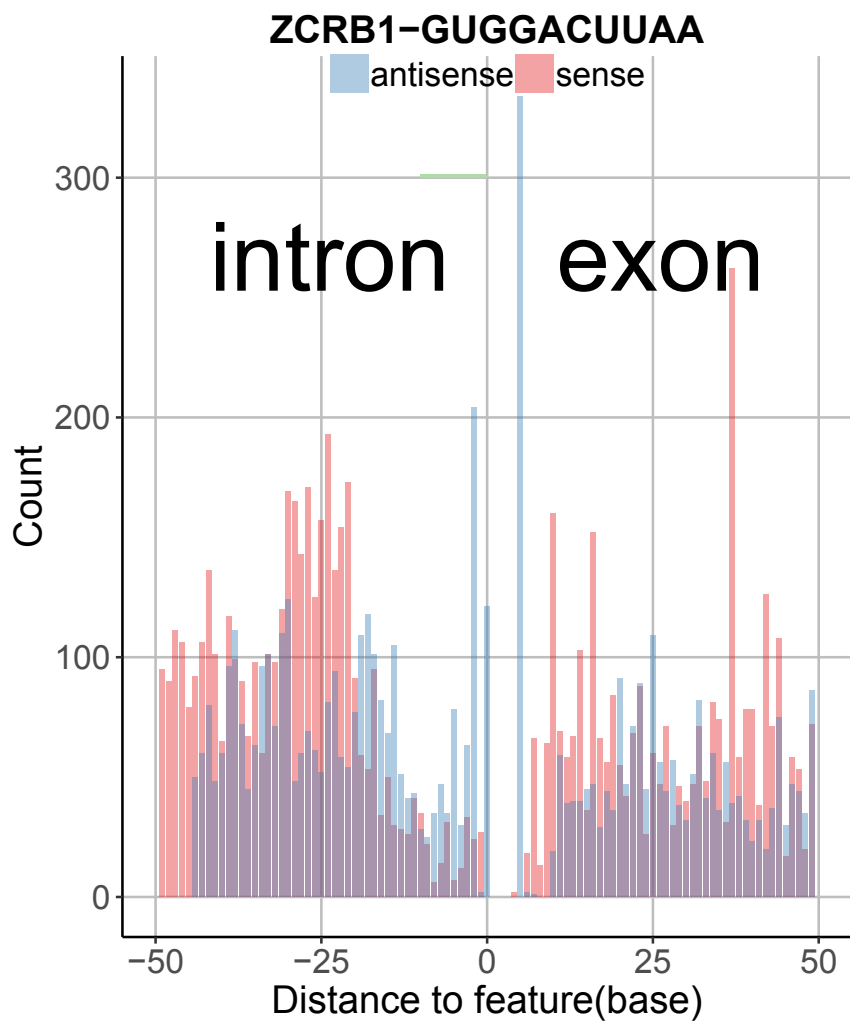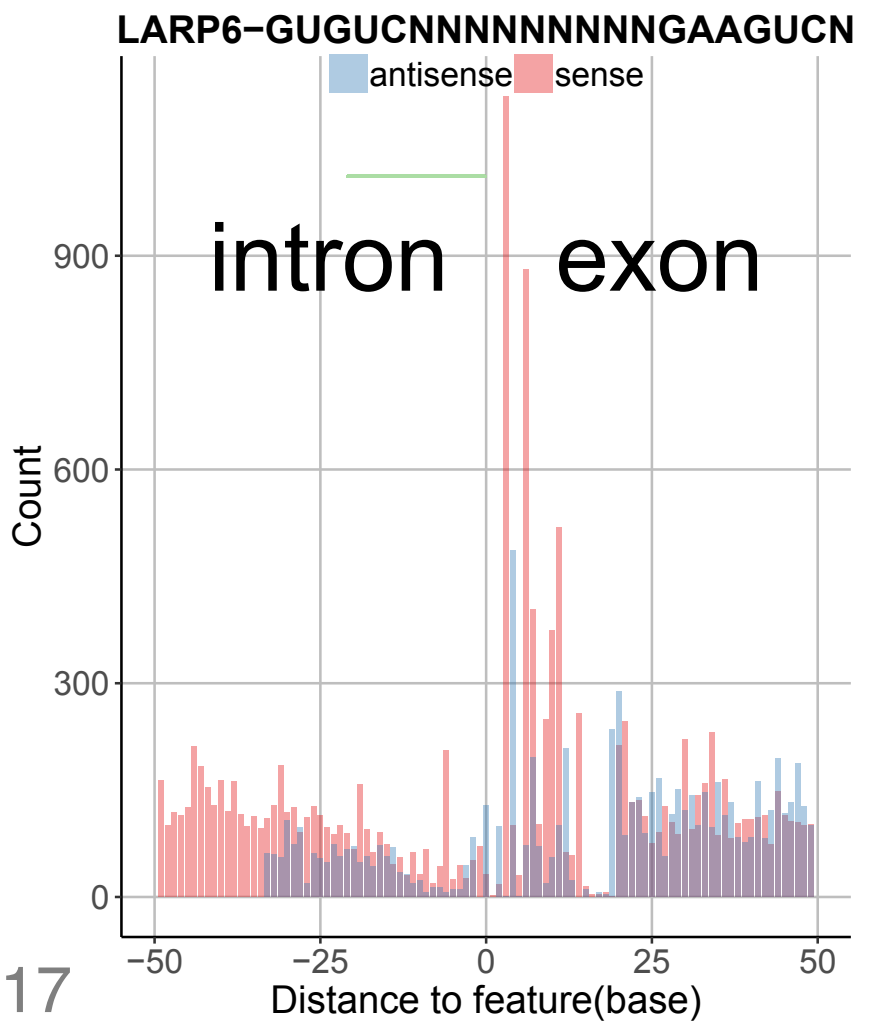

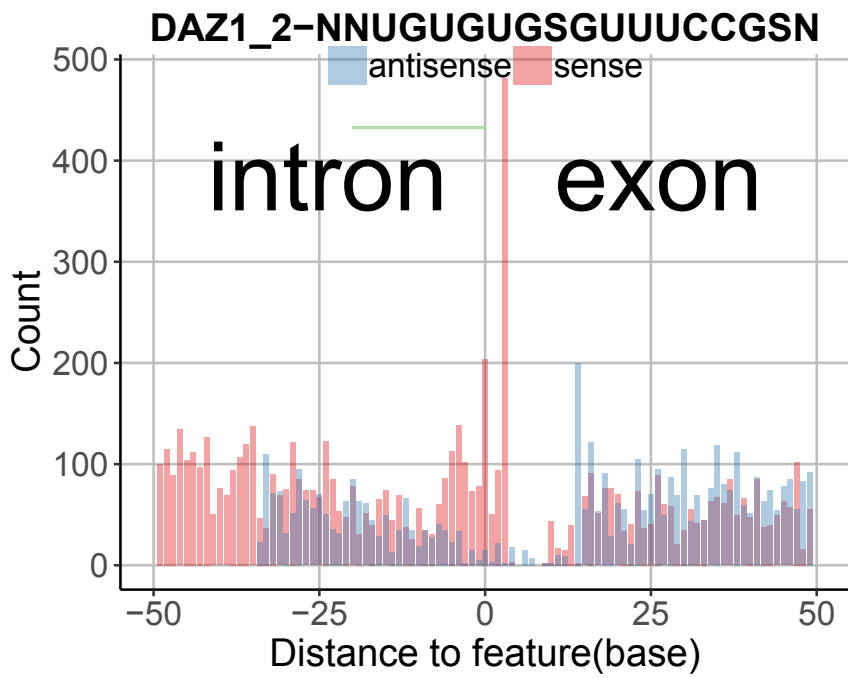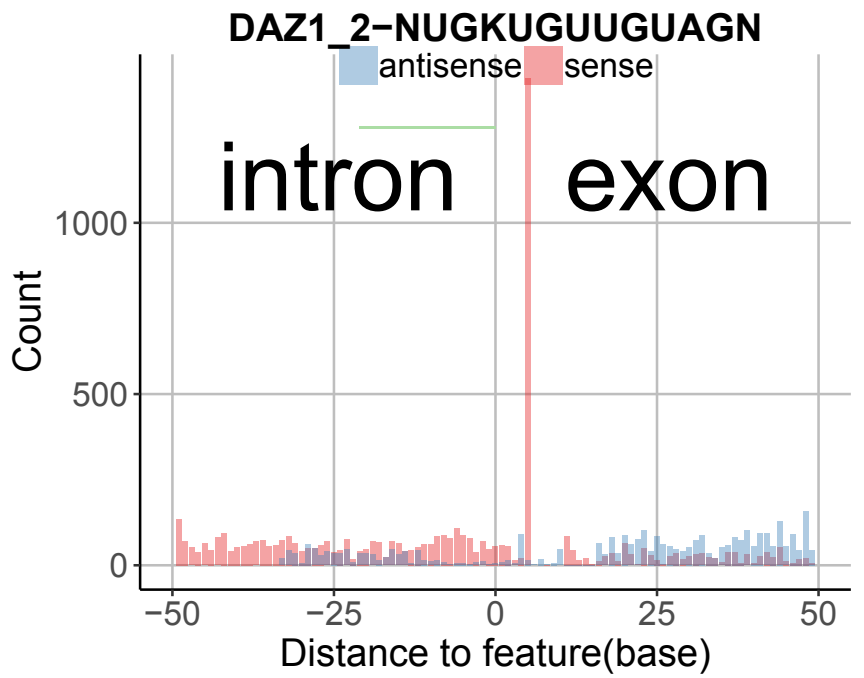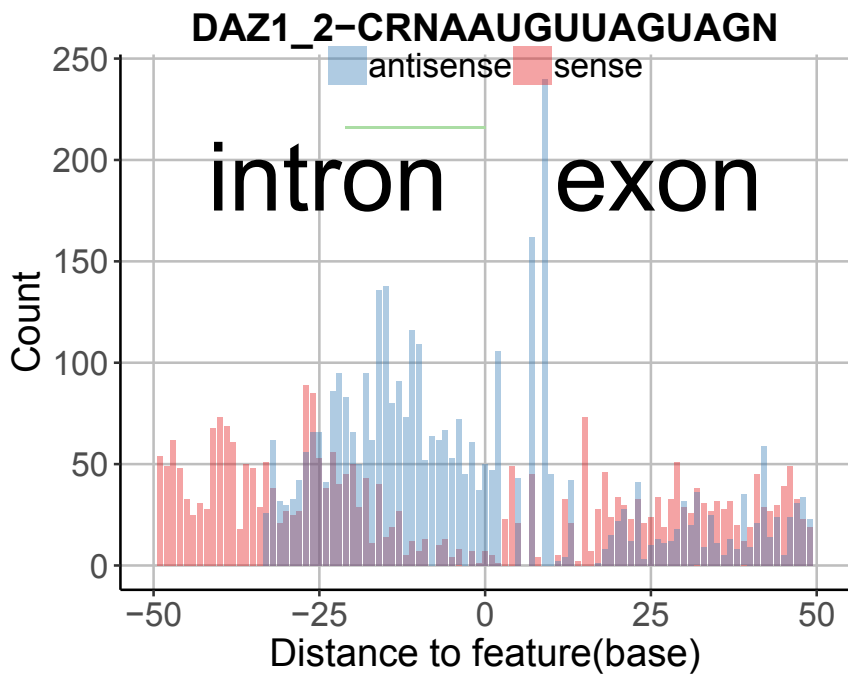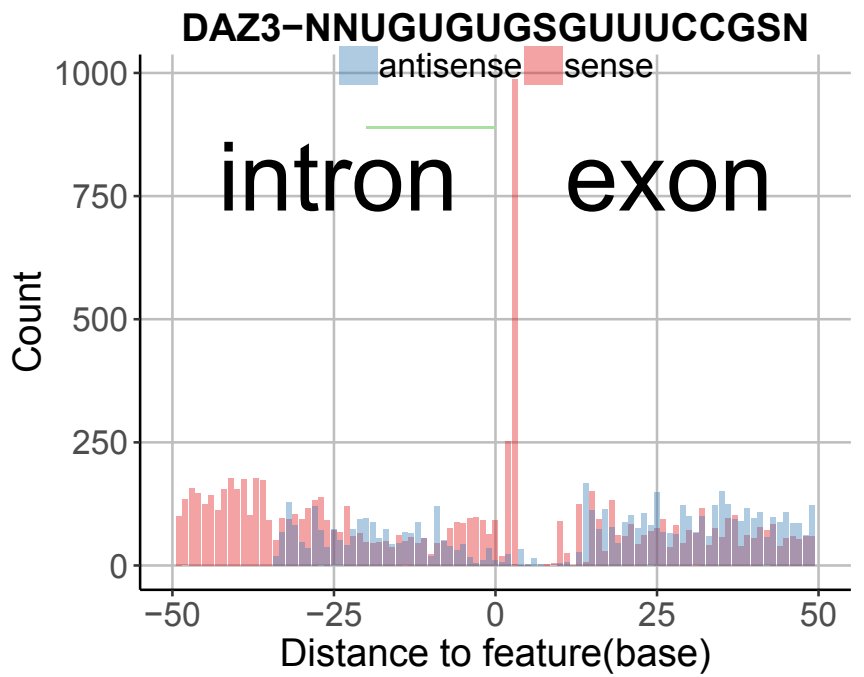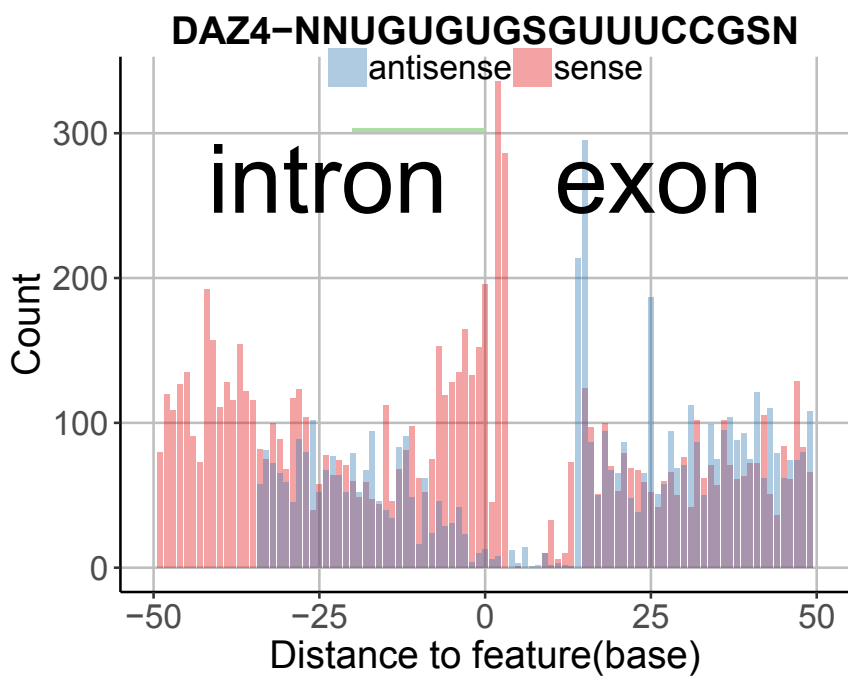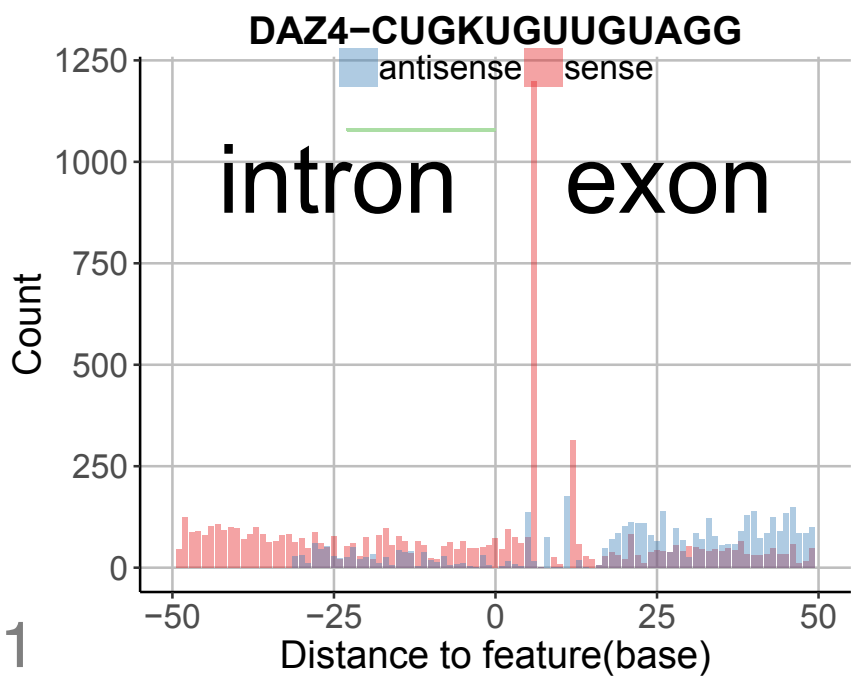

1

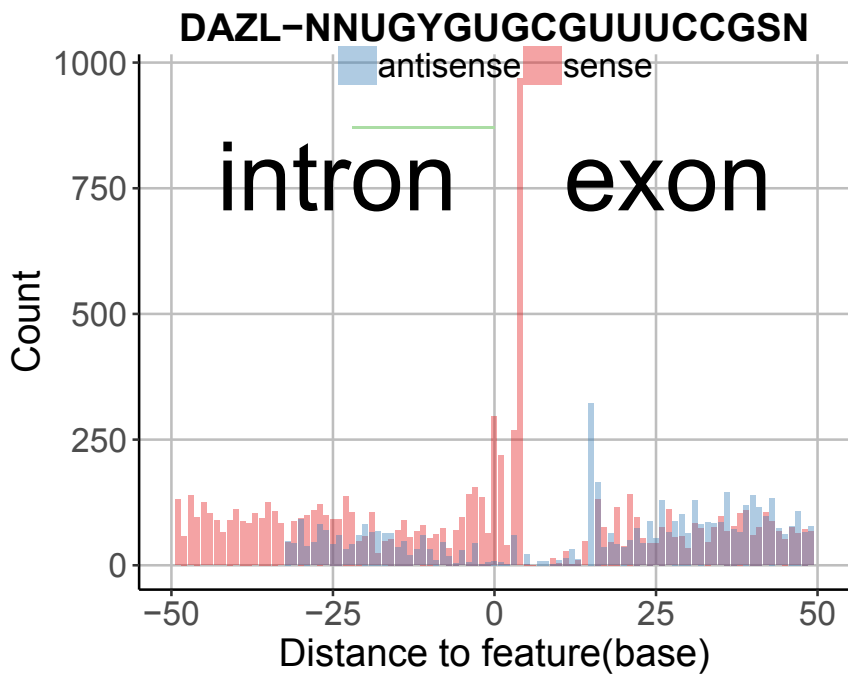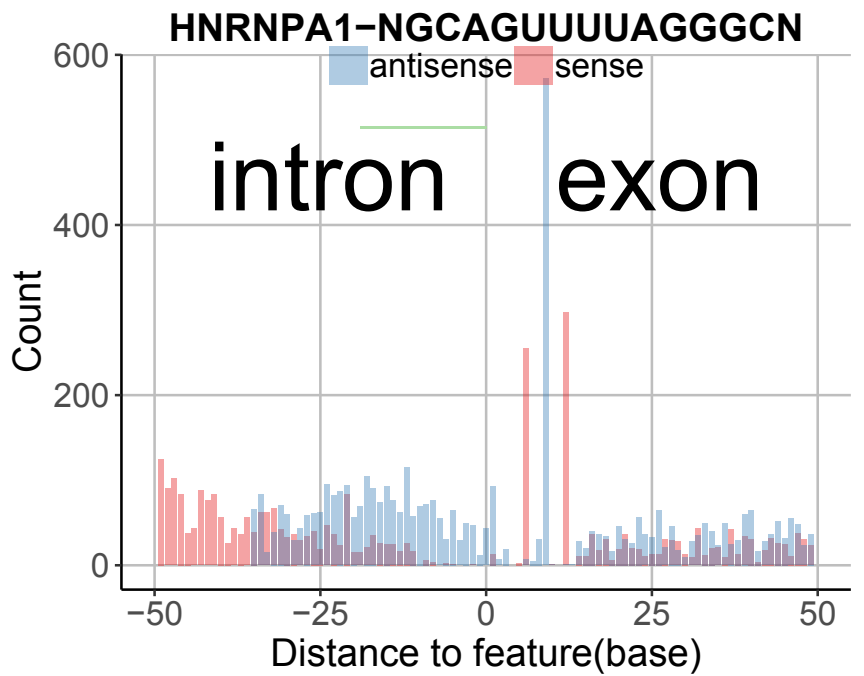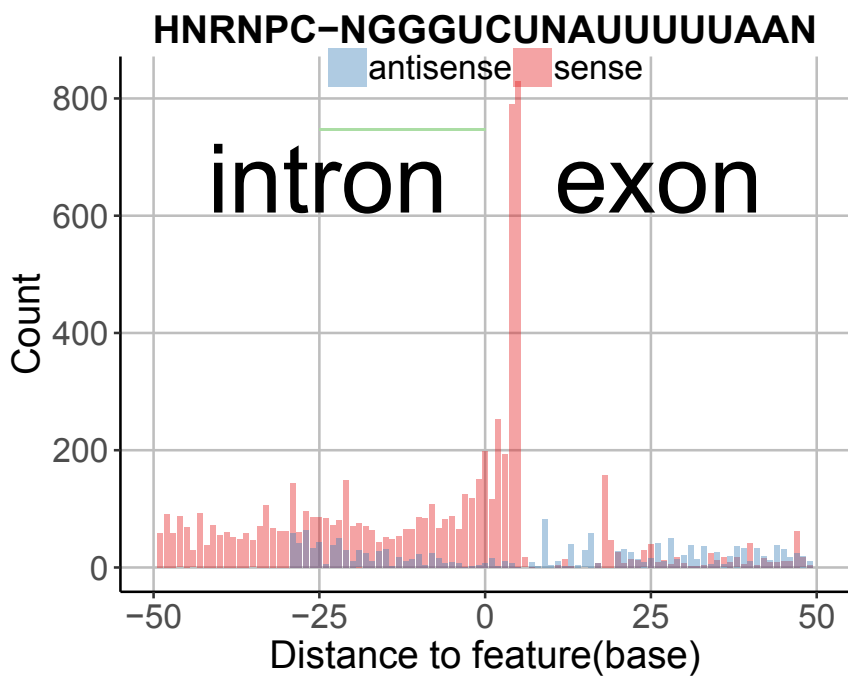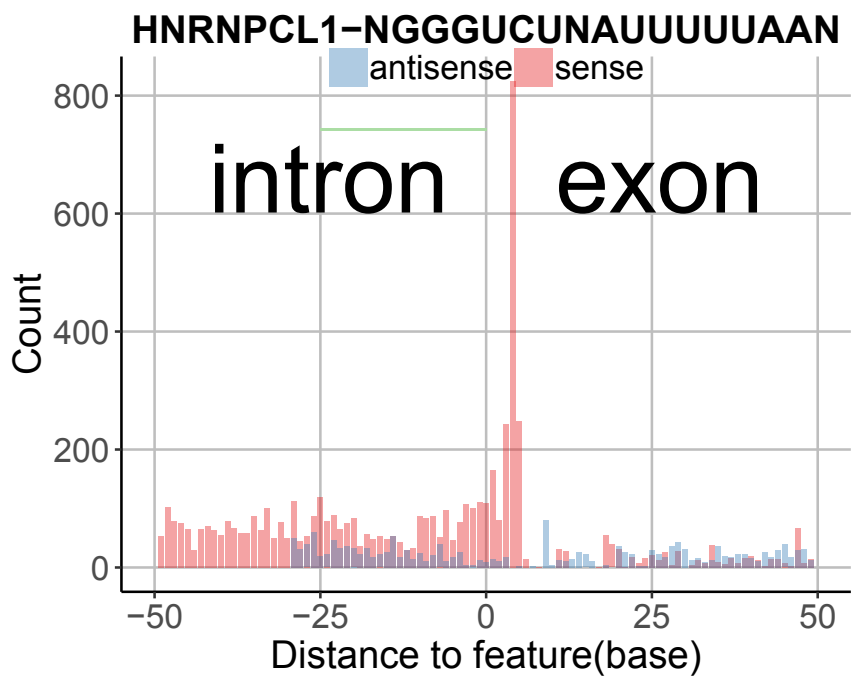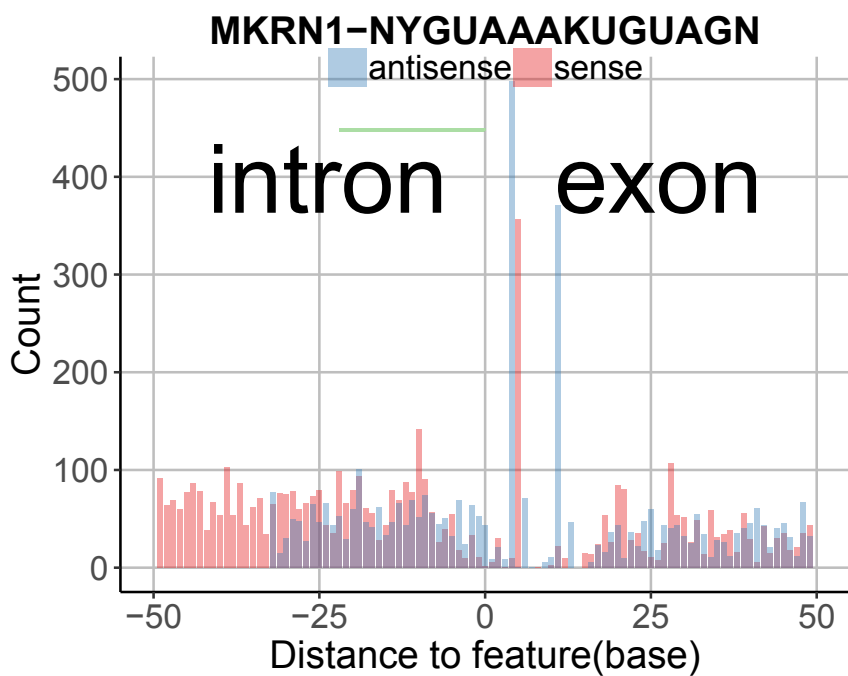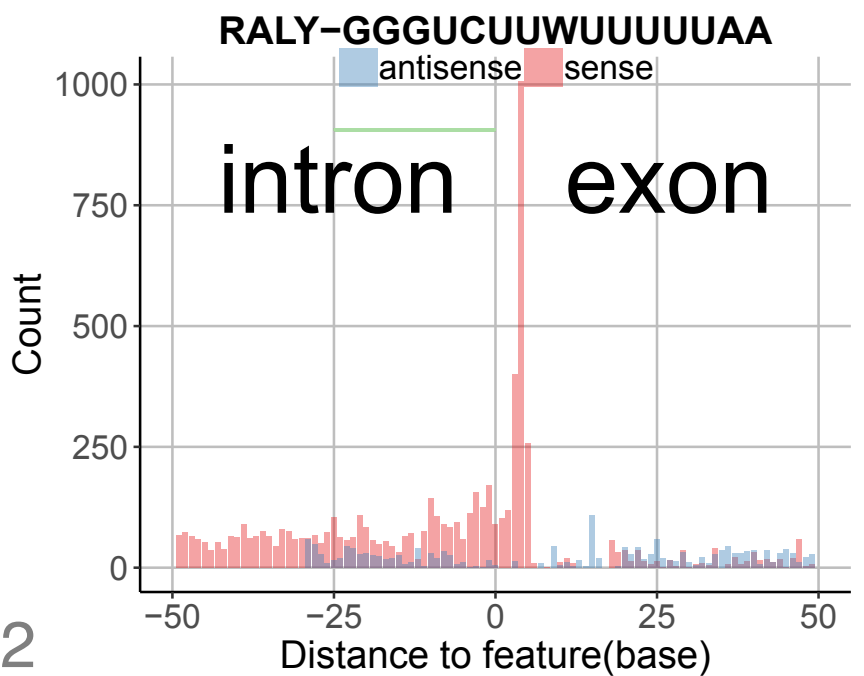

2

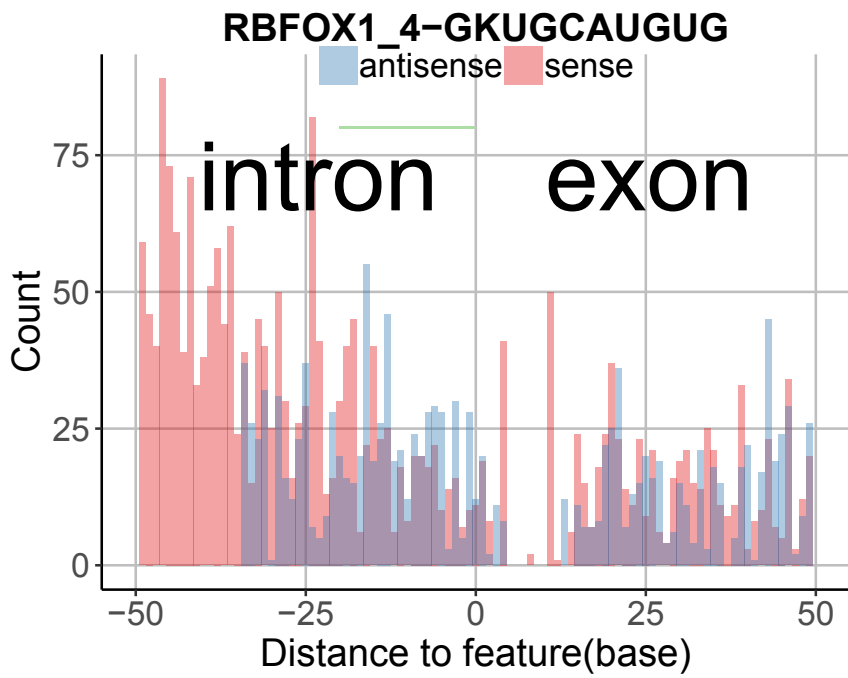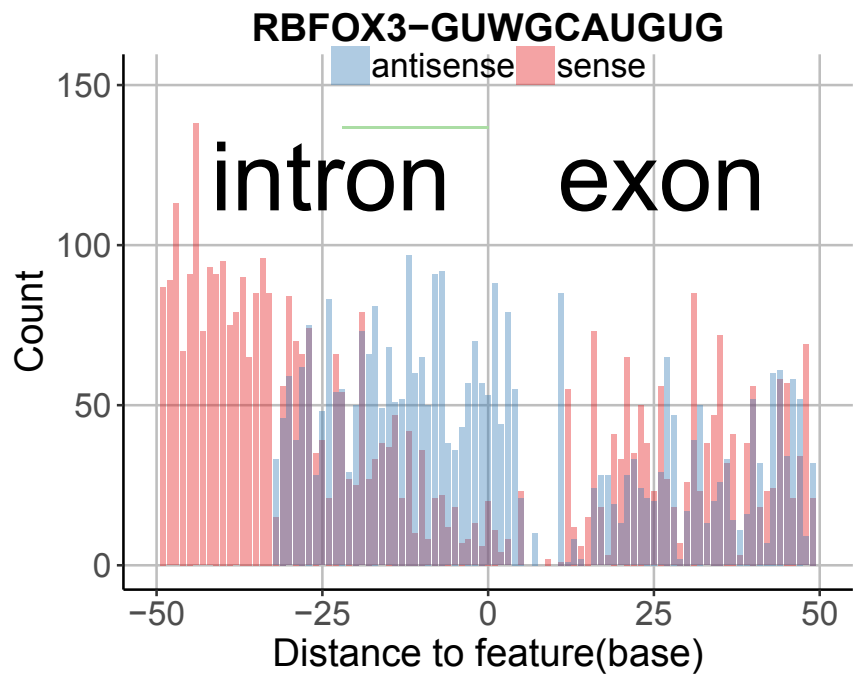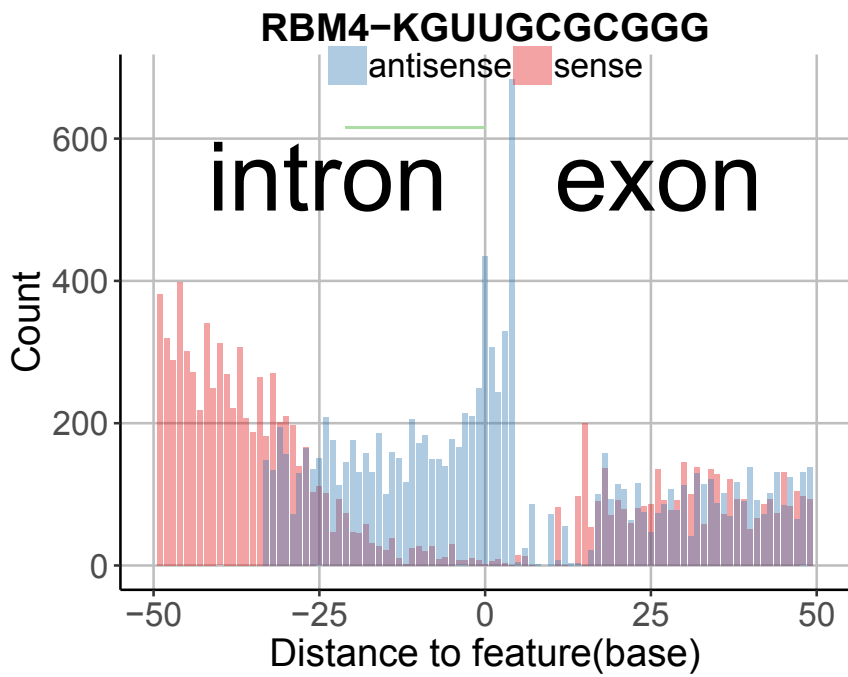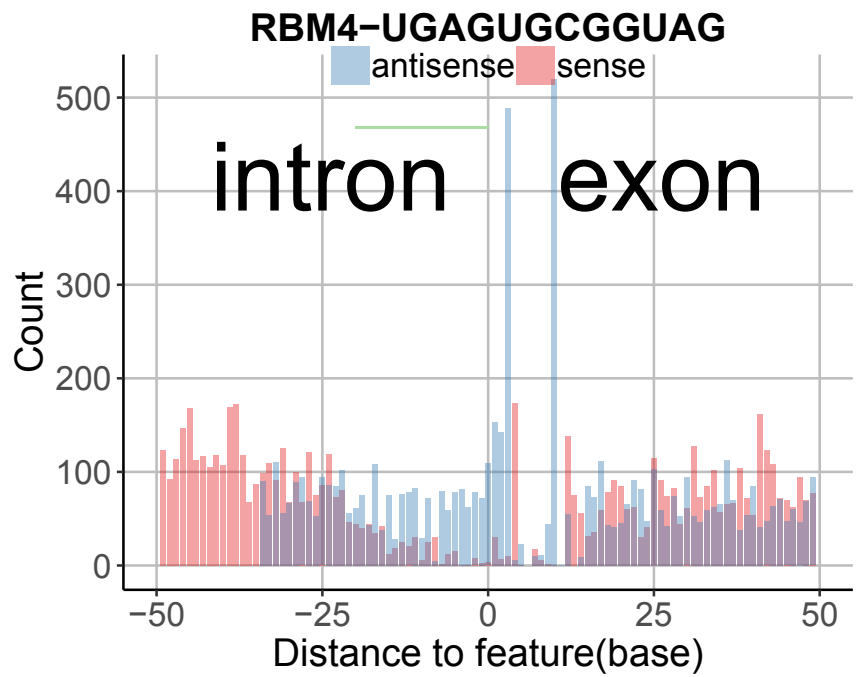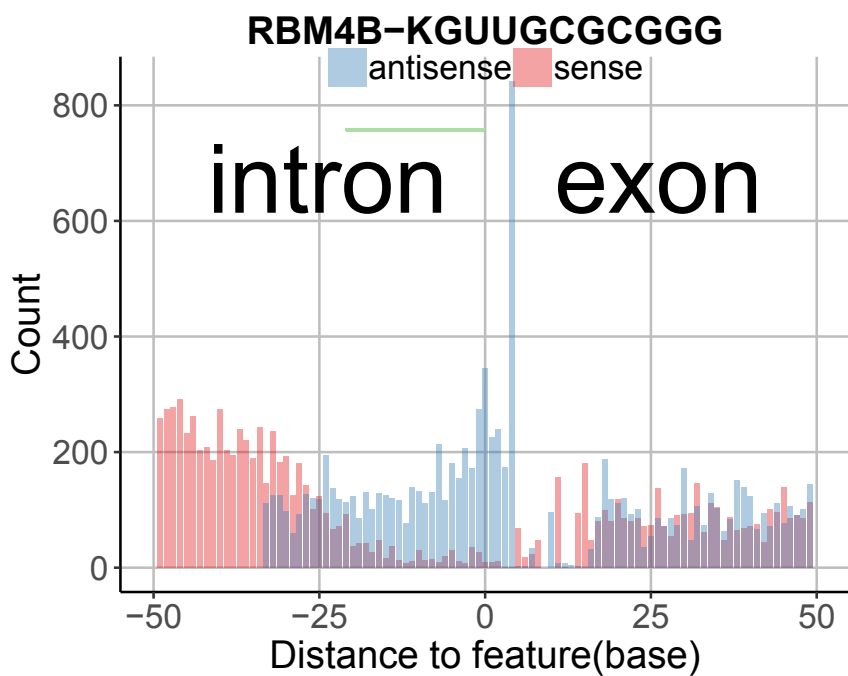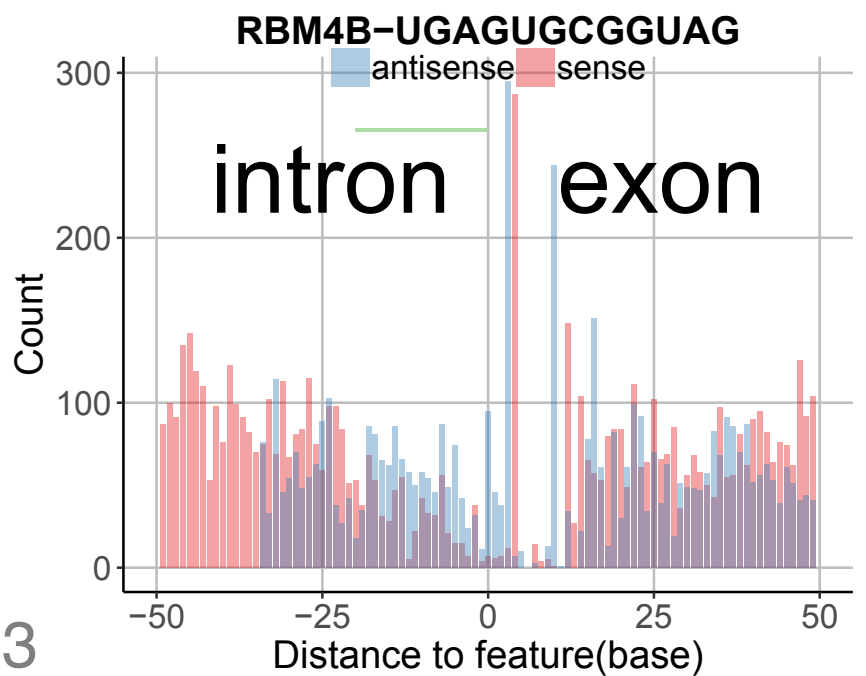

3

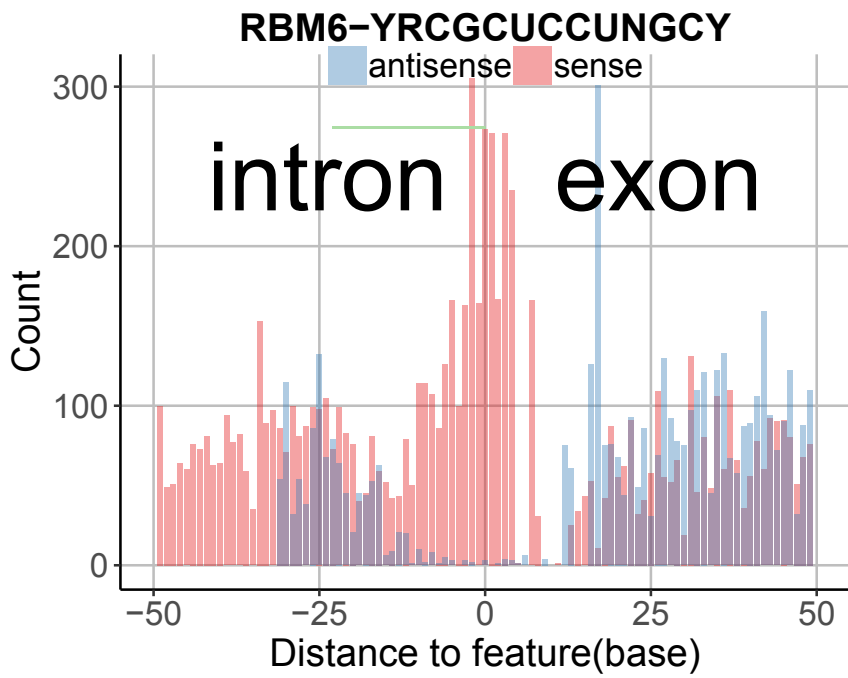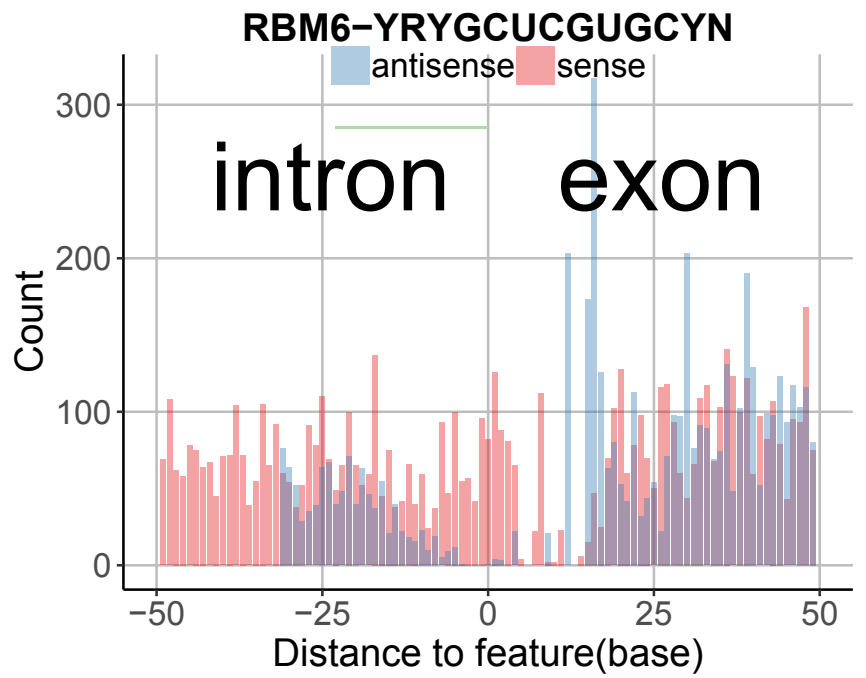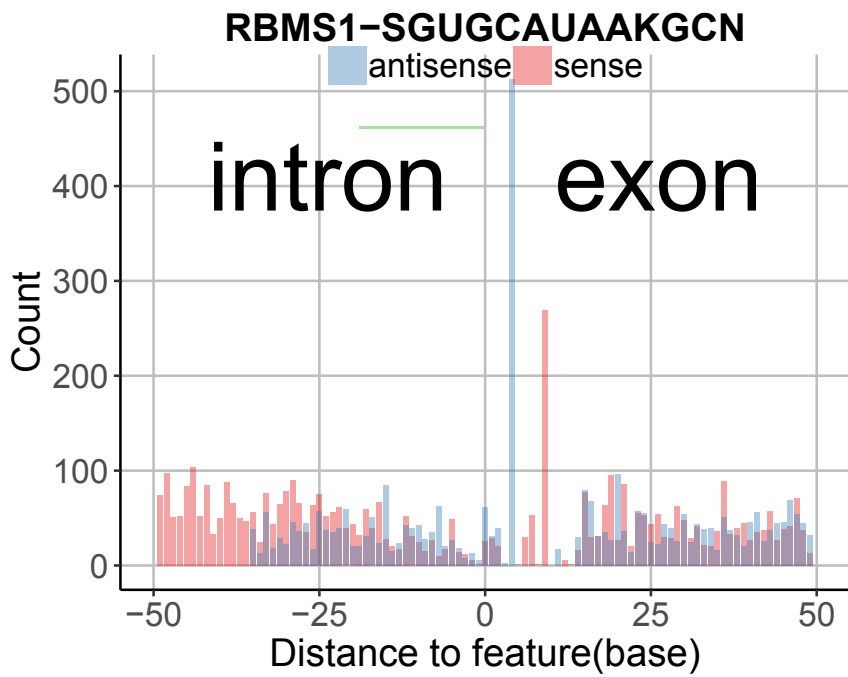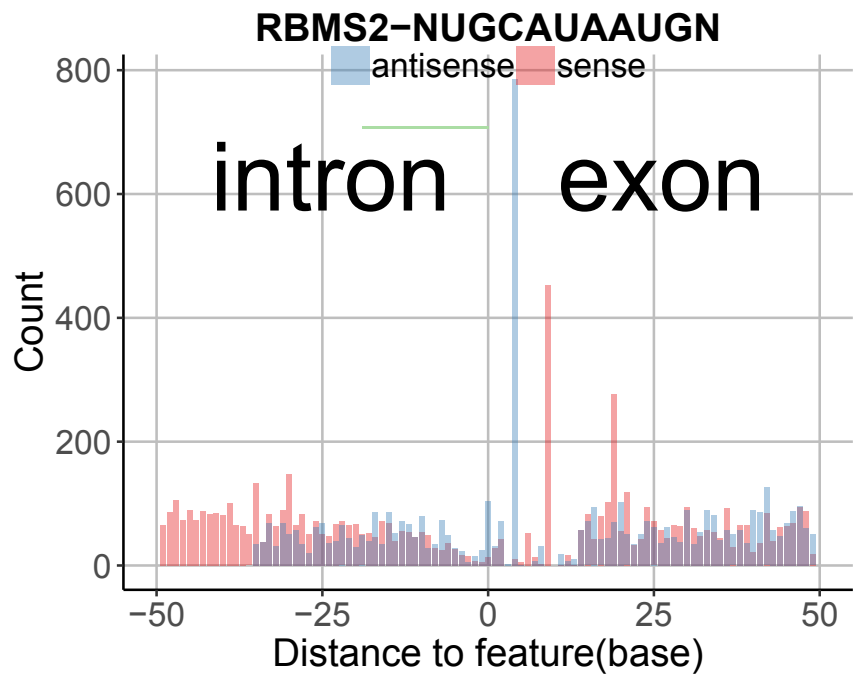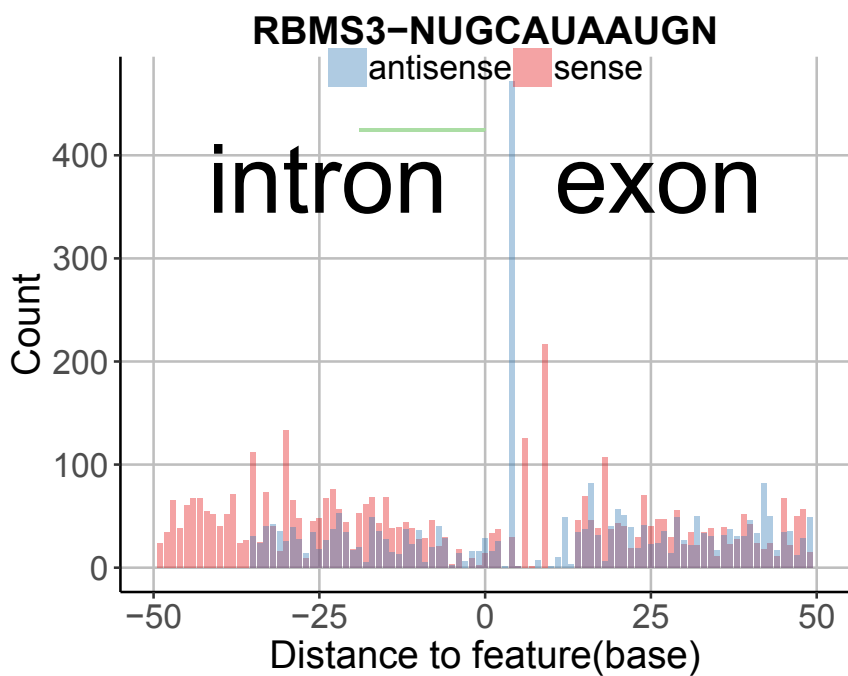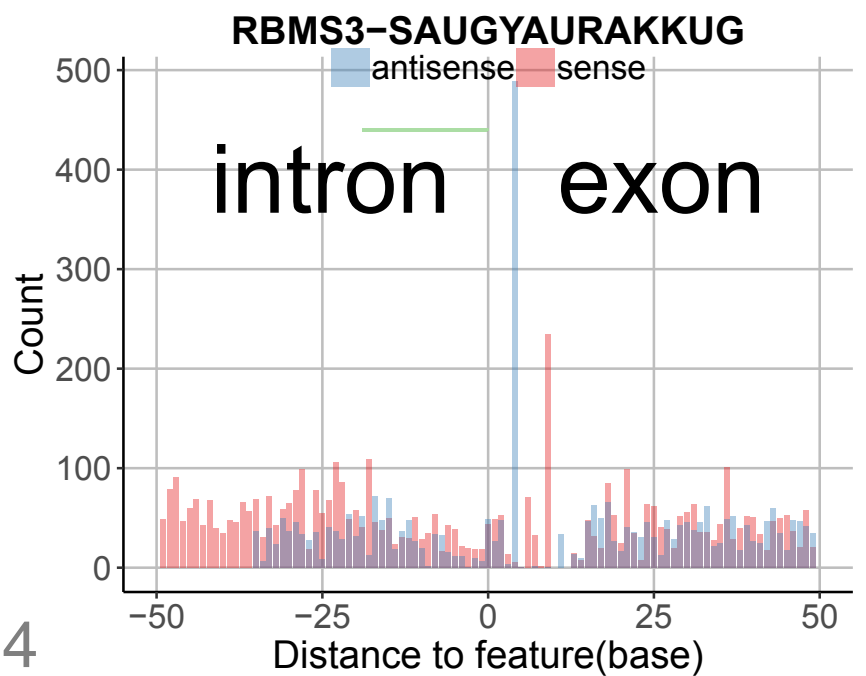

4

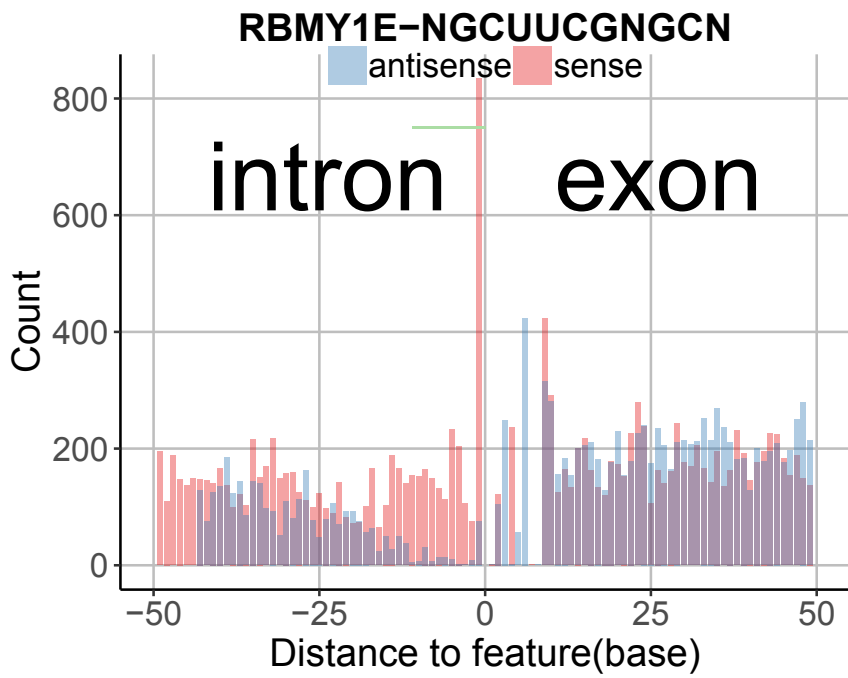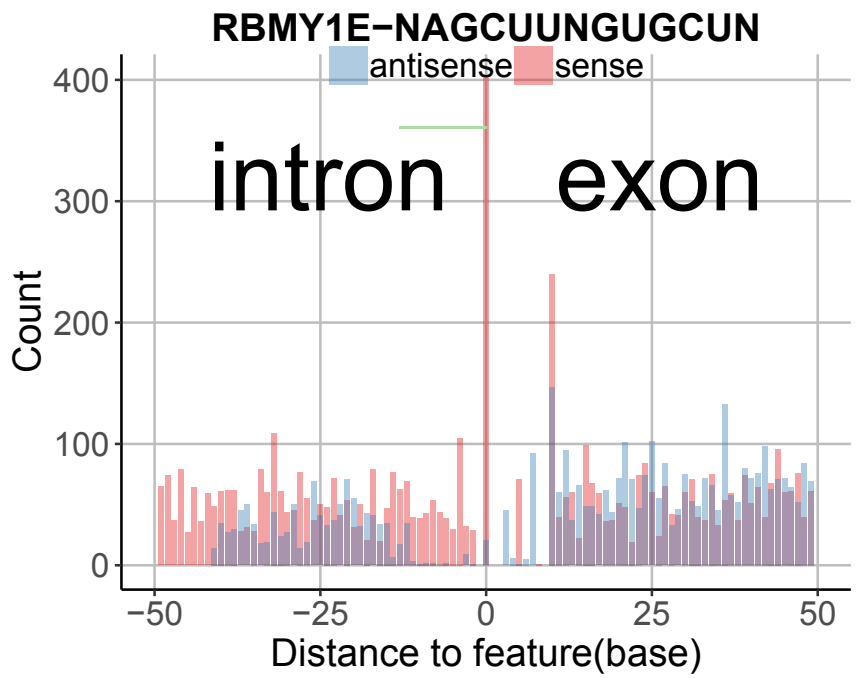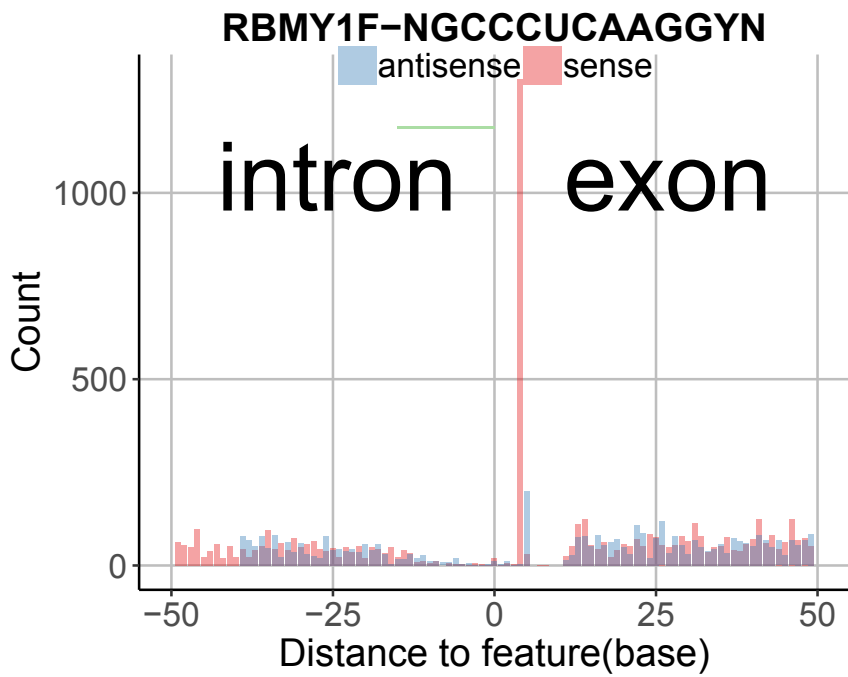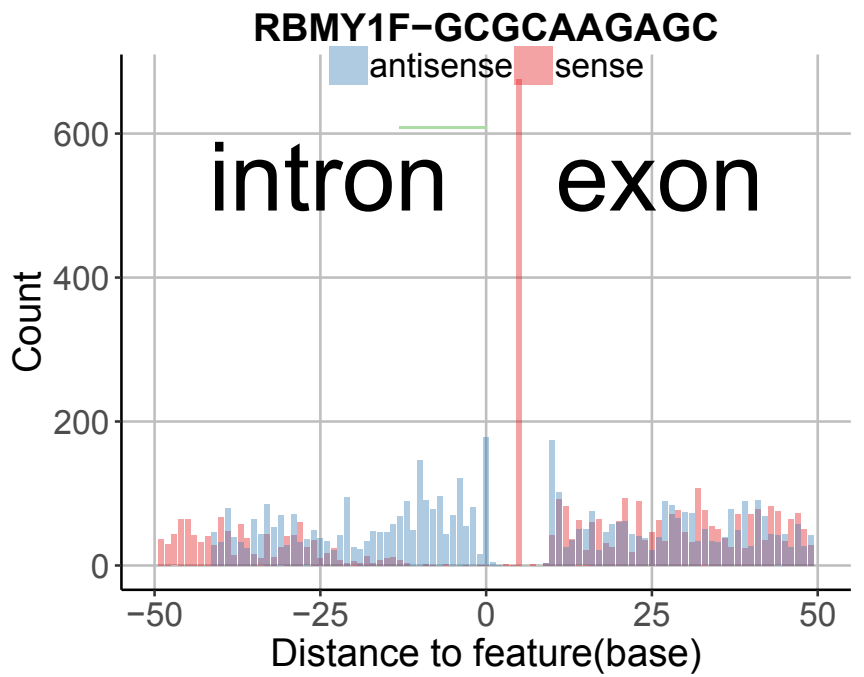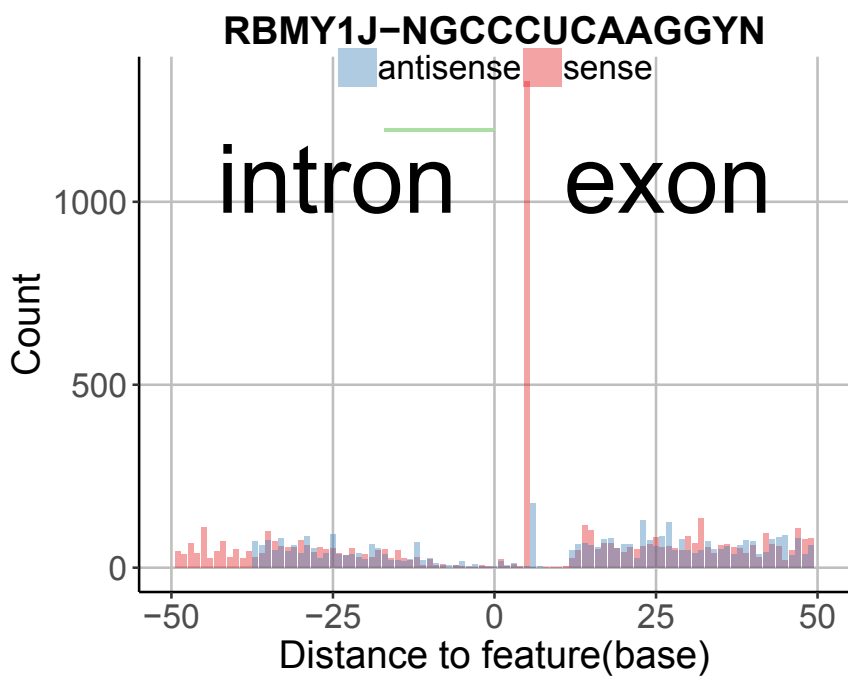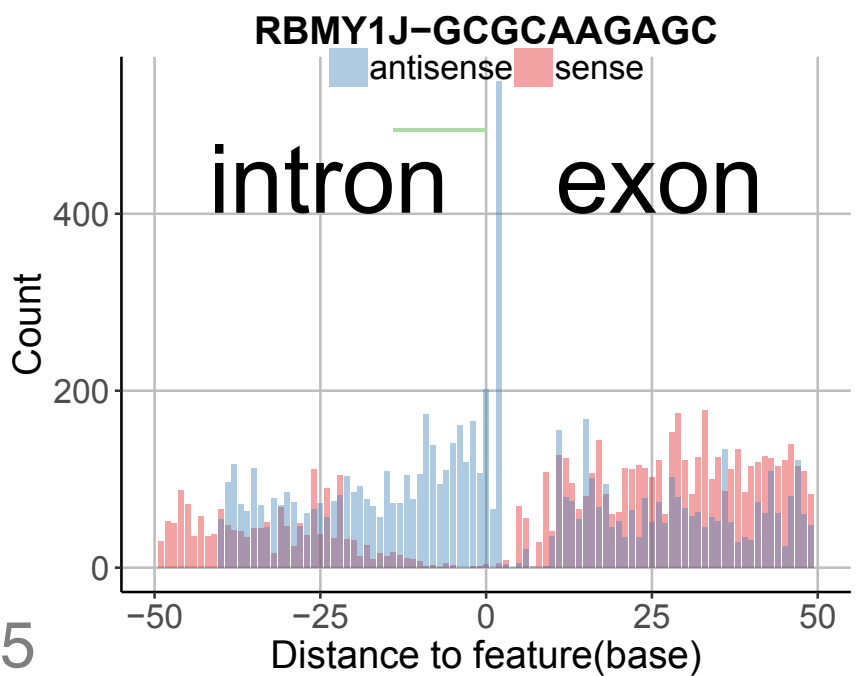

5

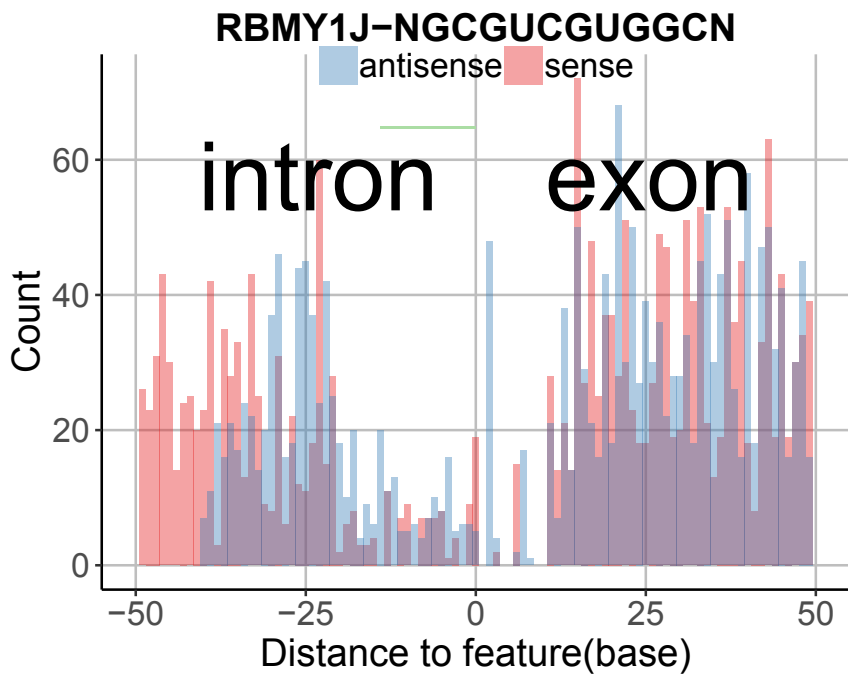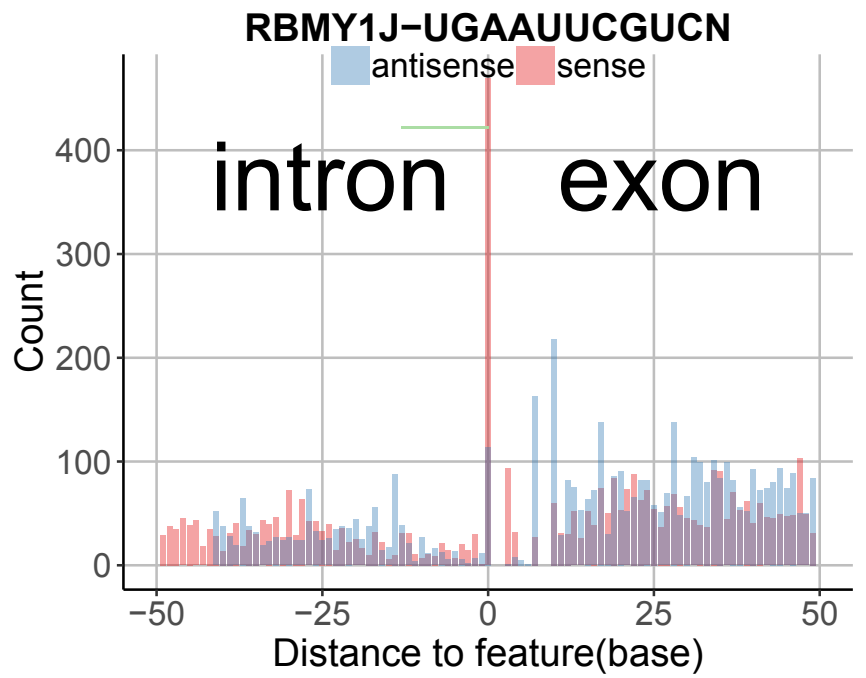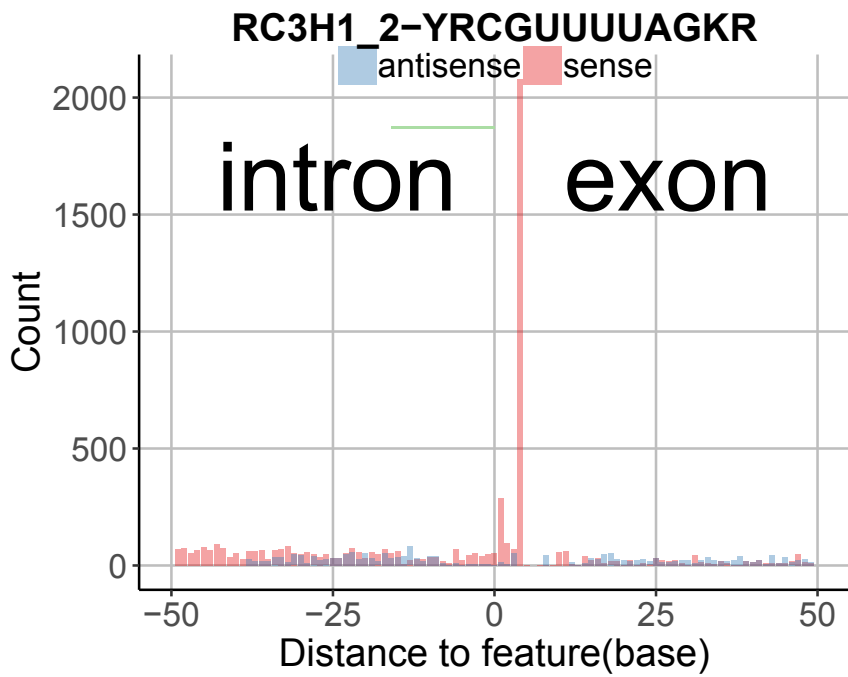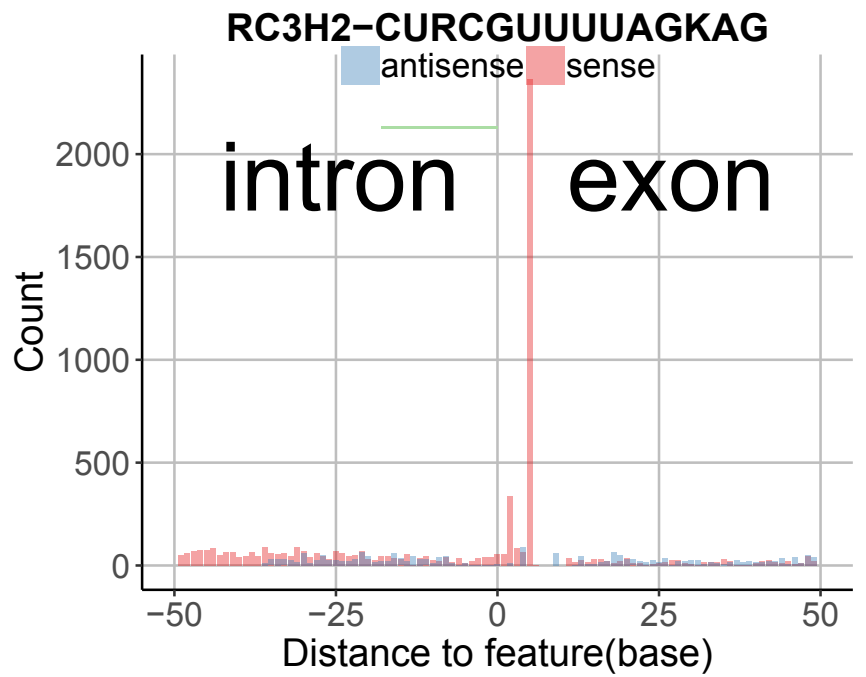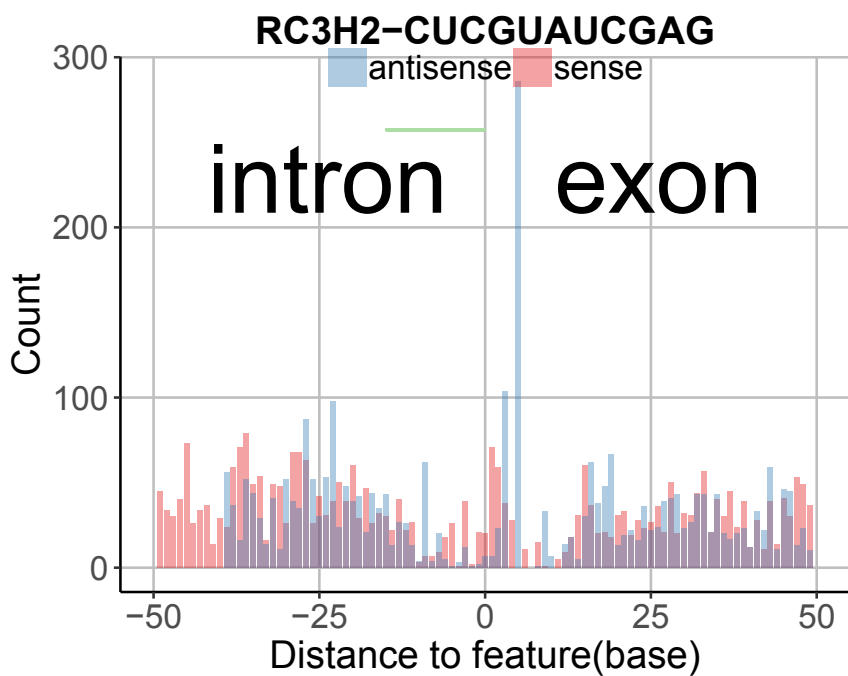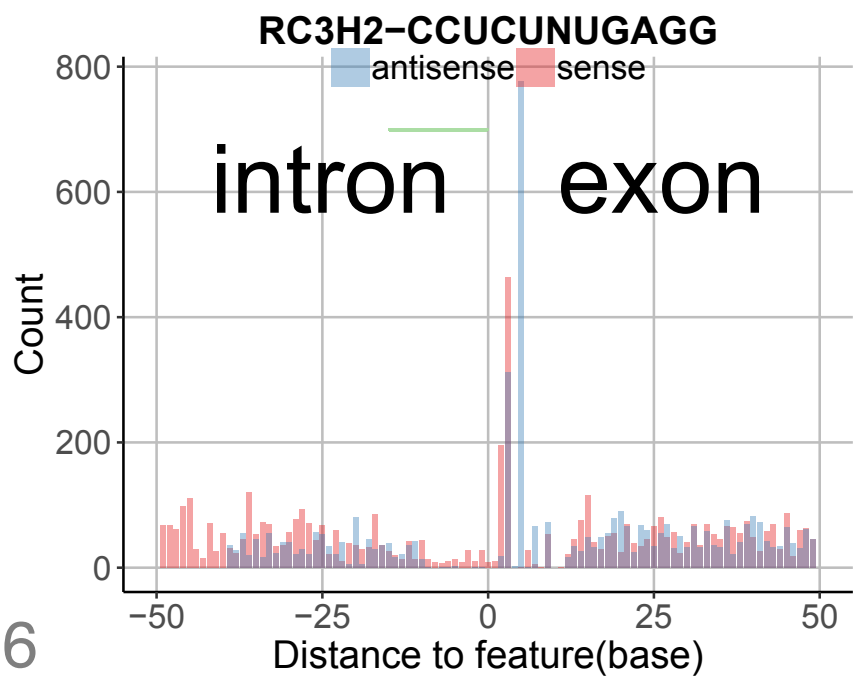

6



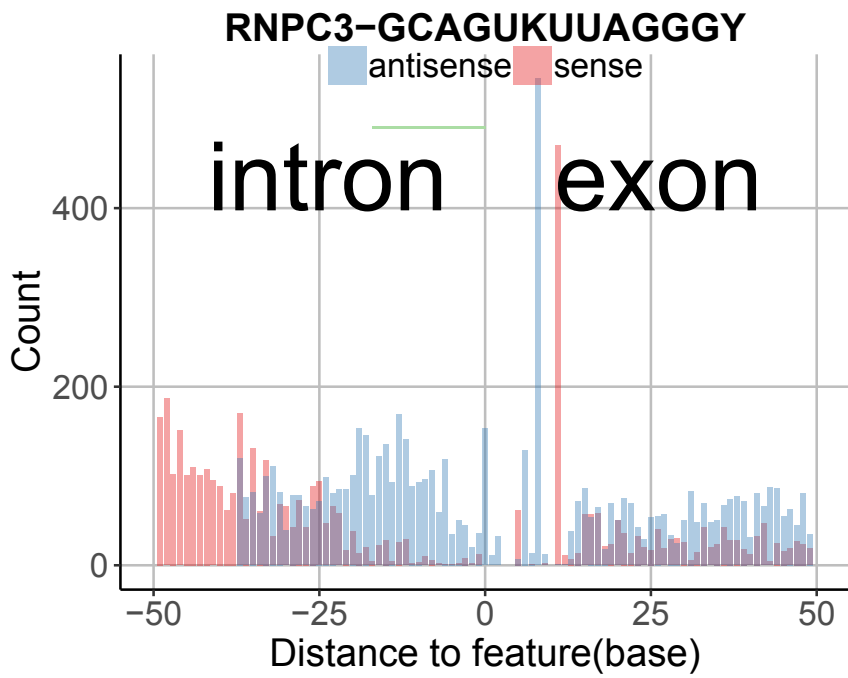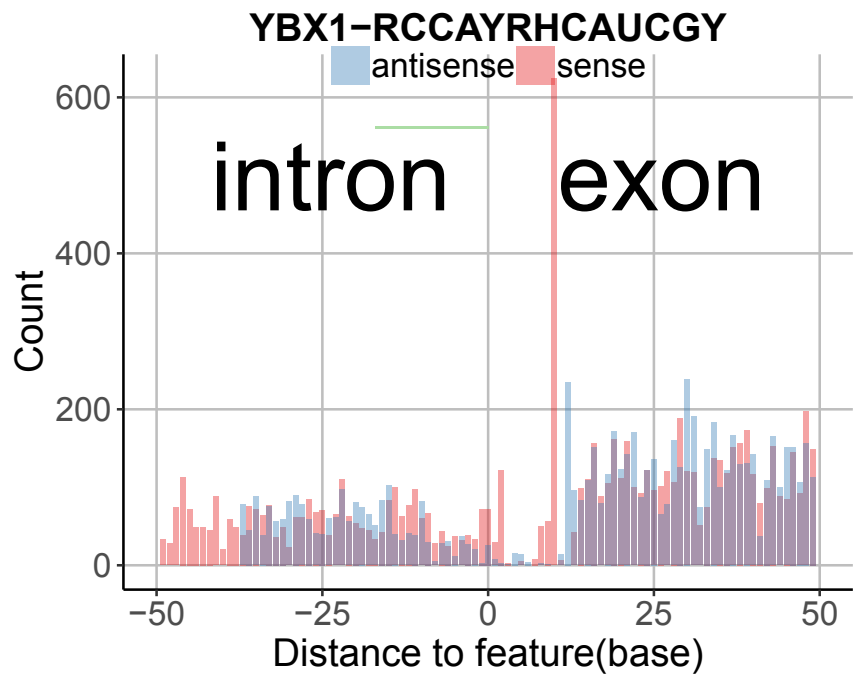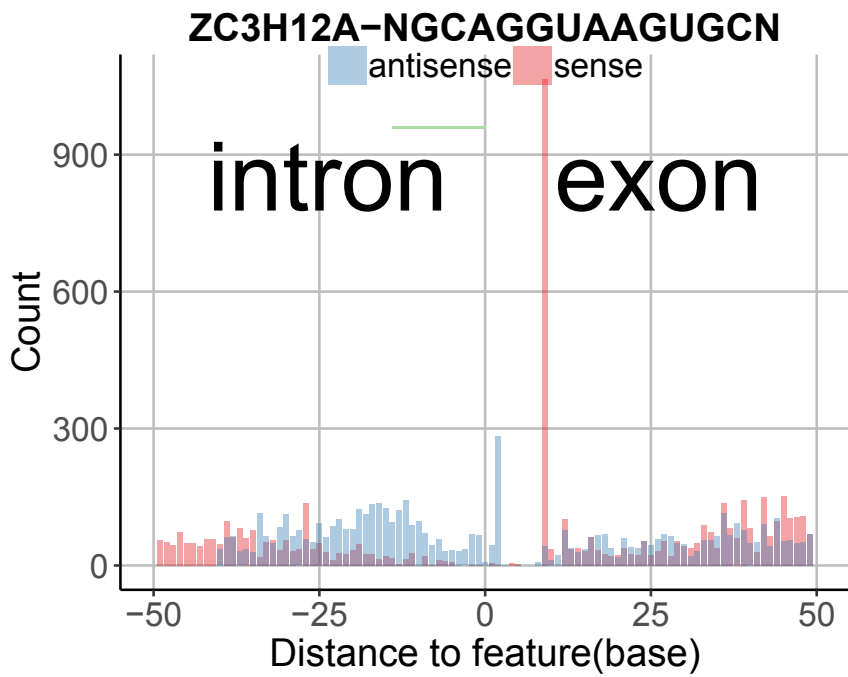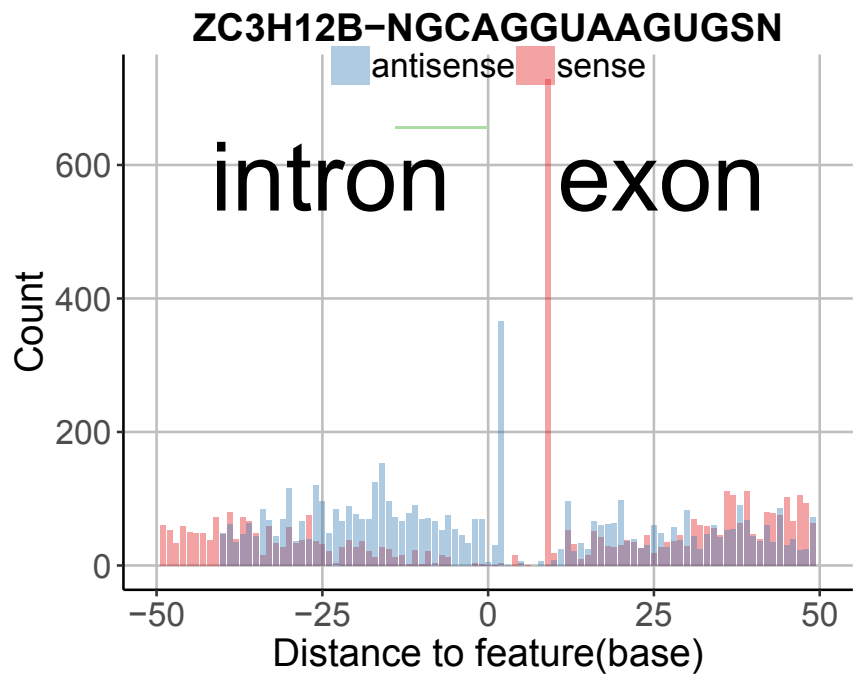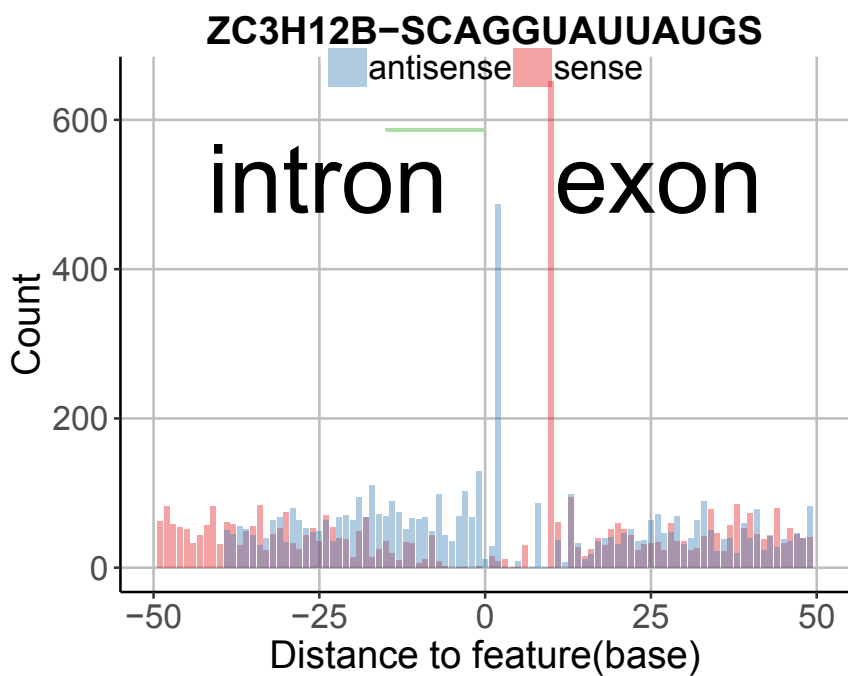

7

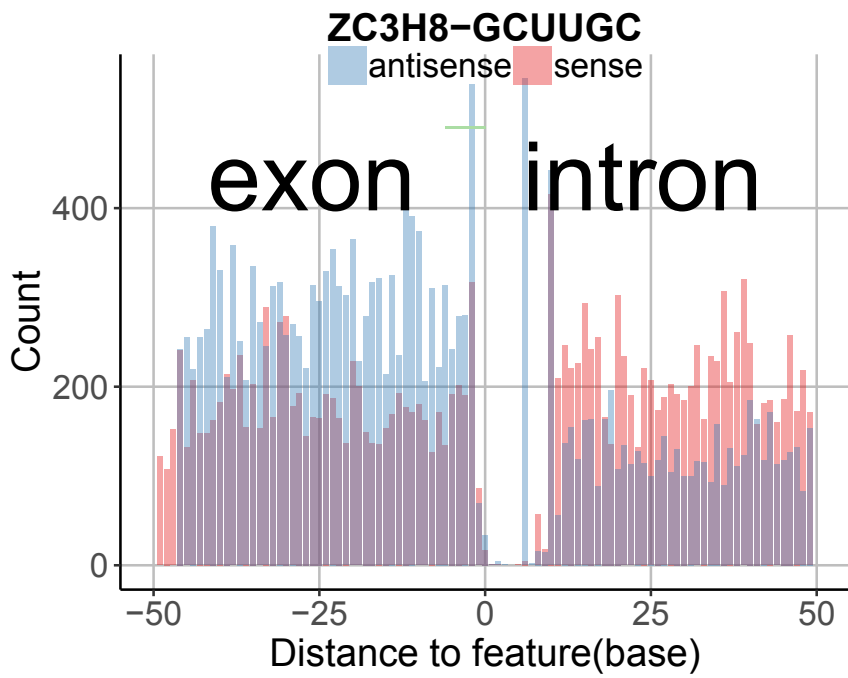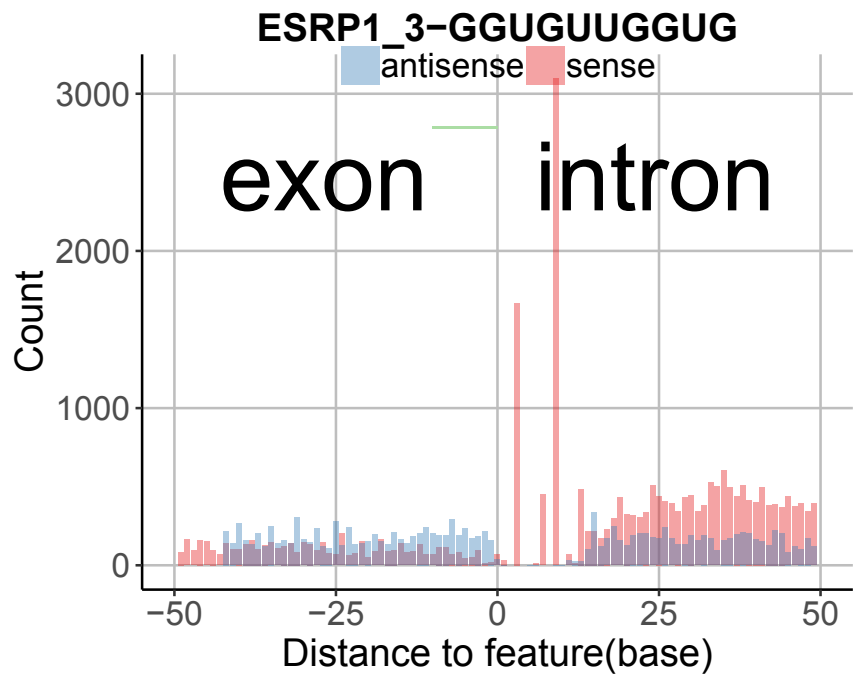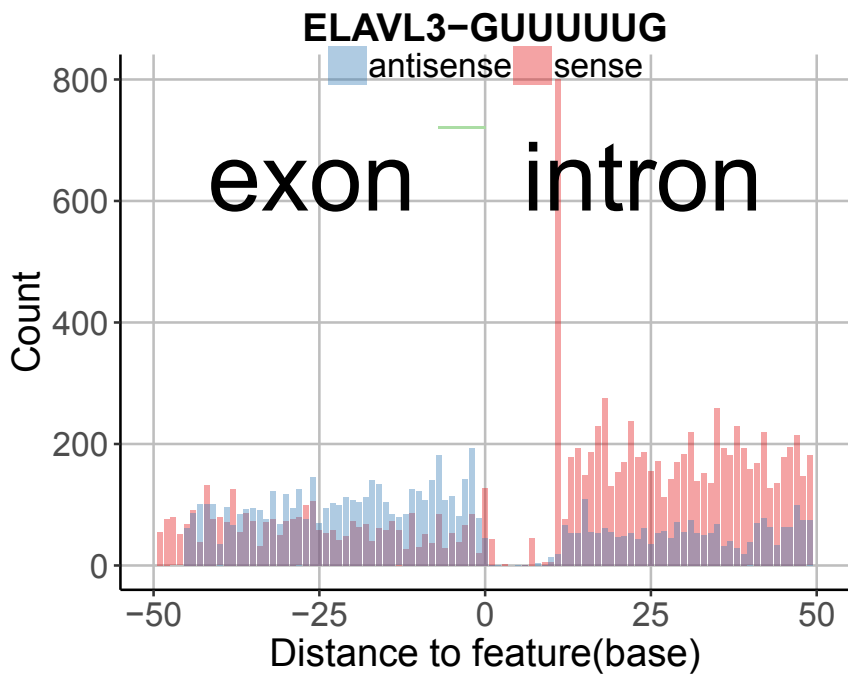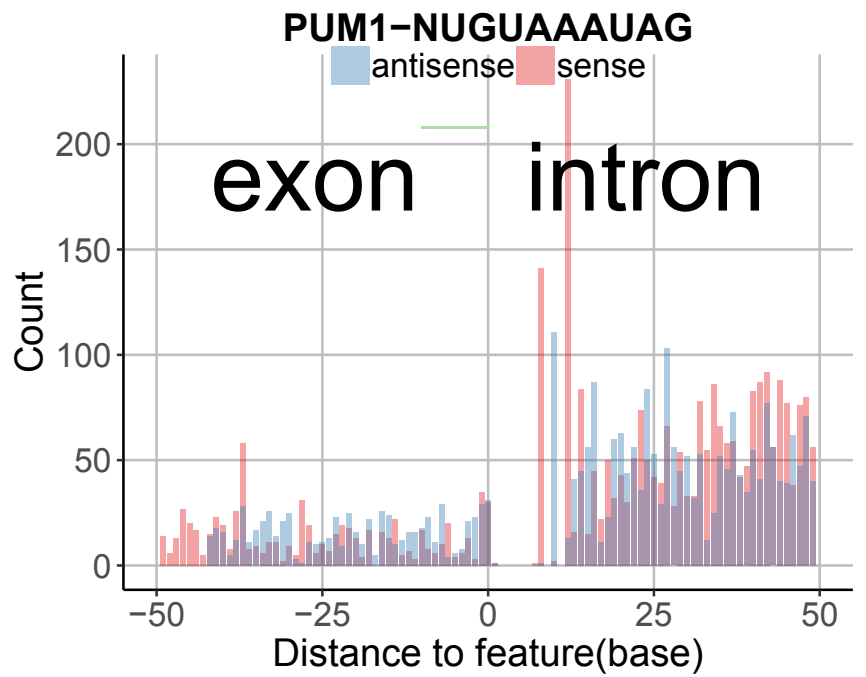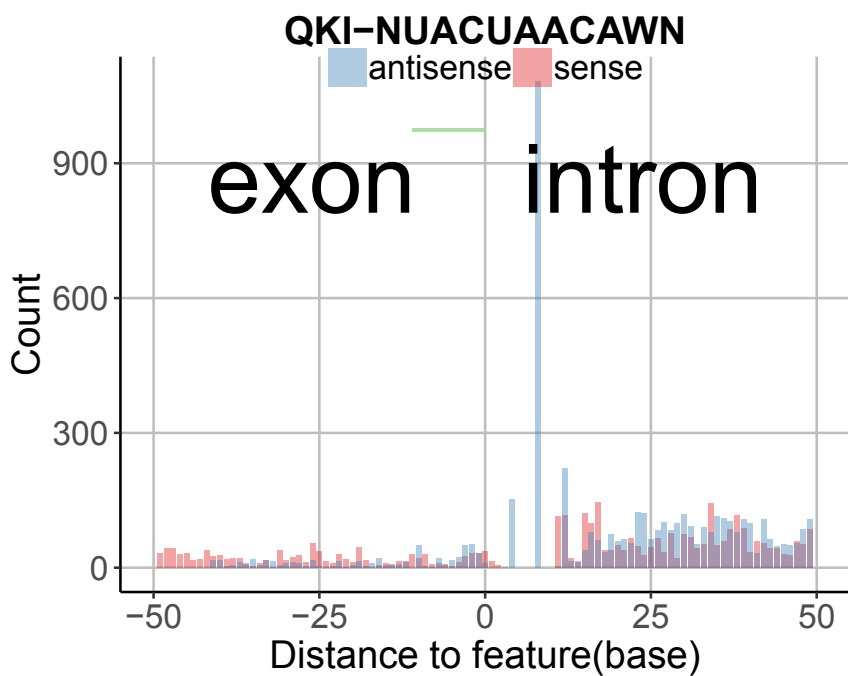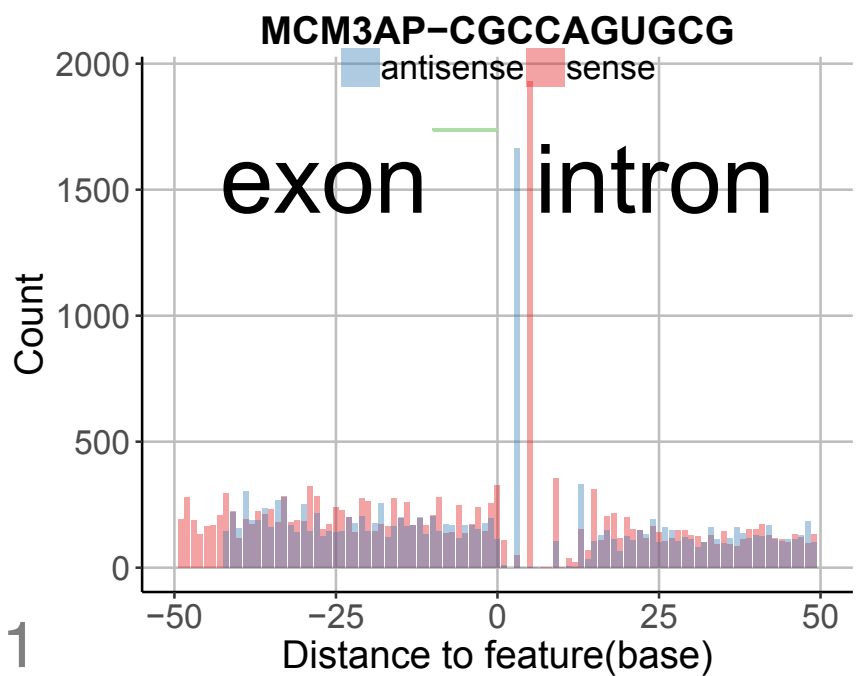

1

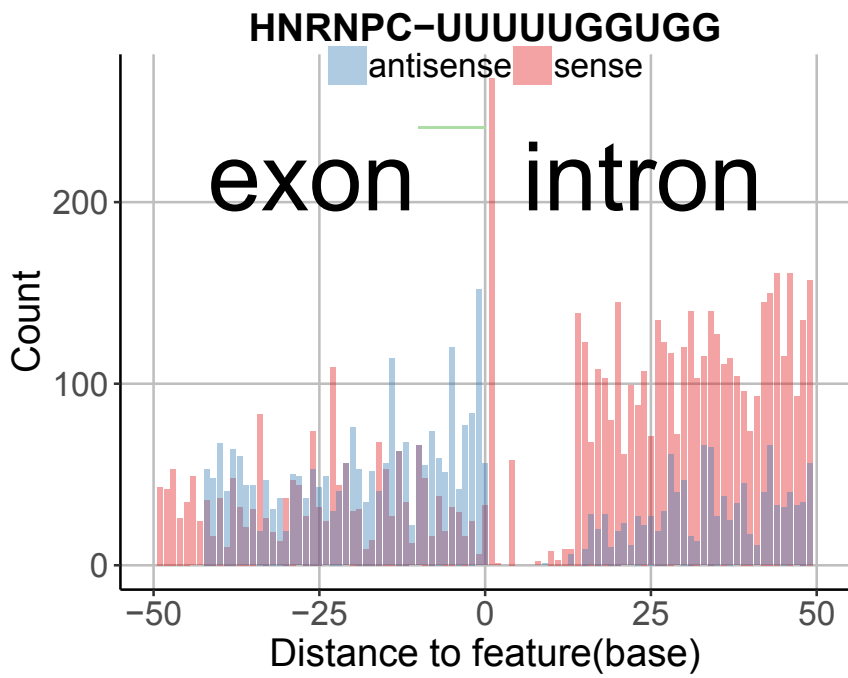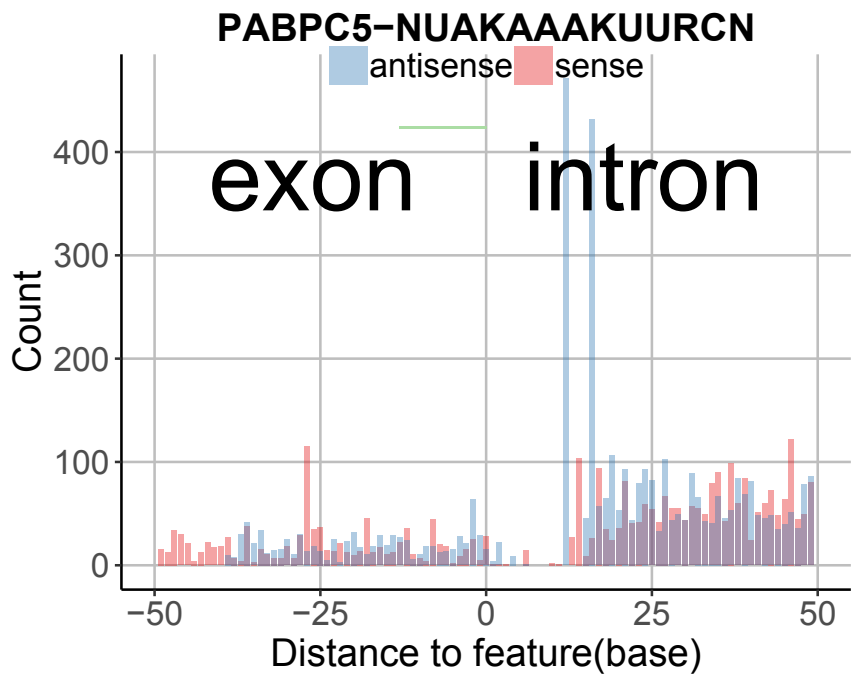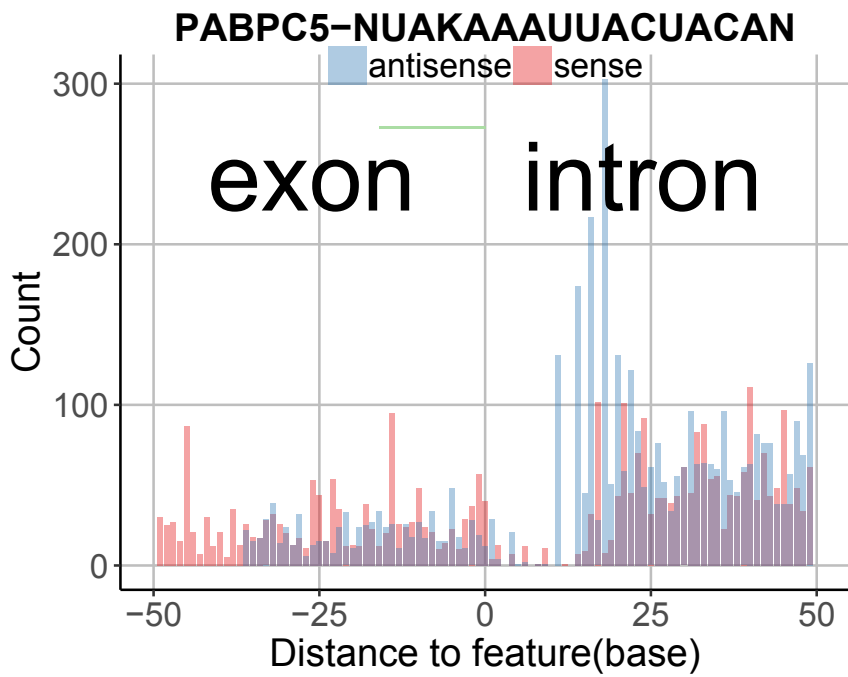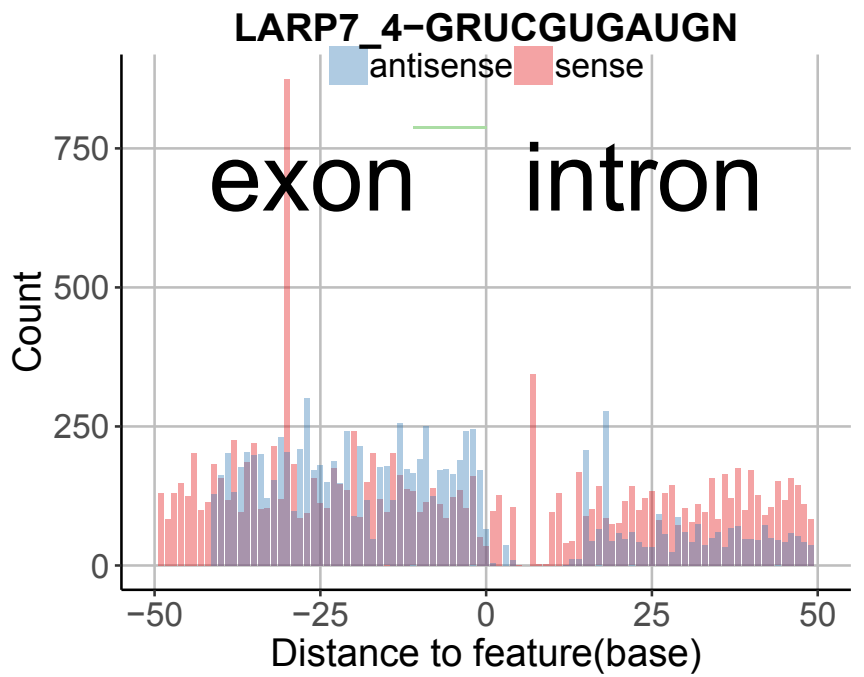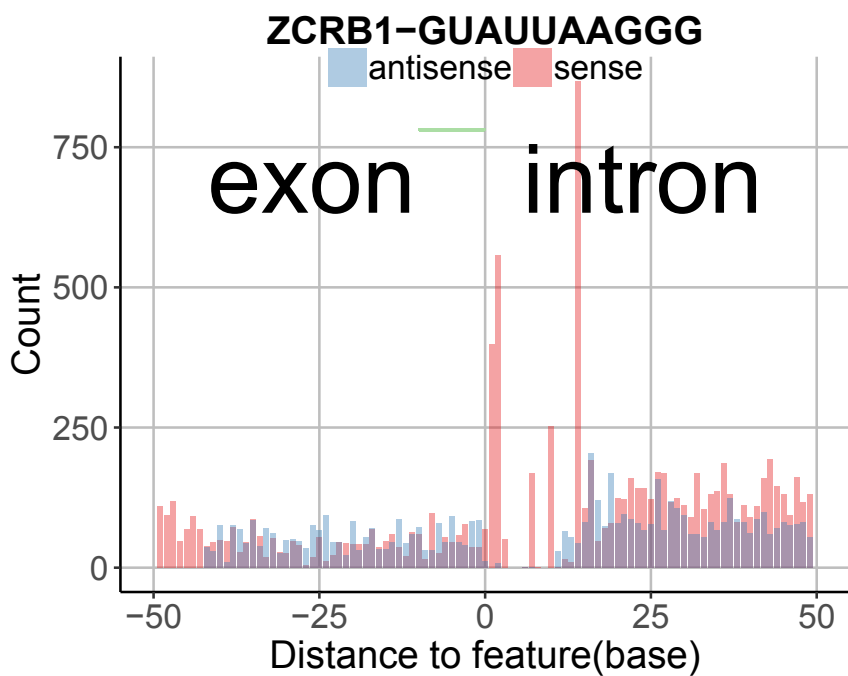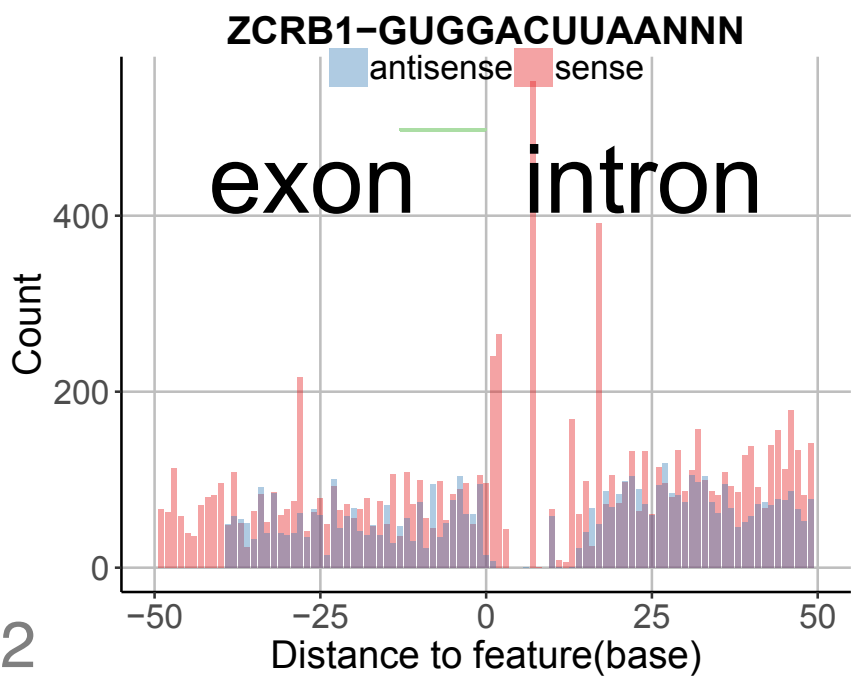

2

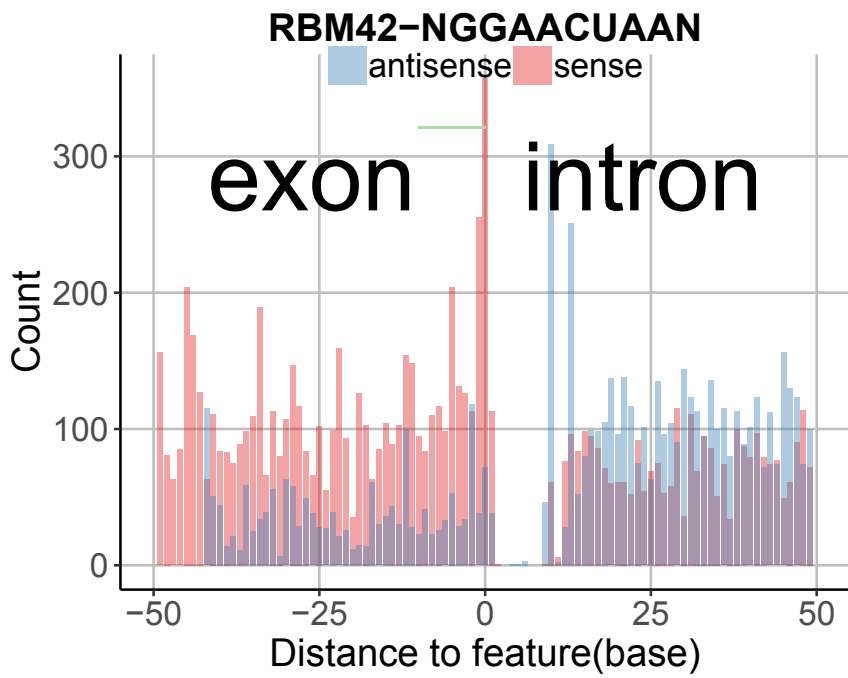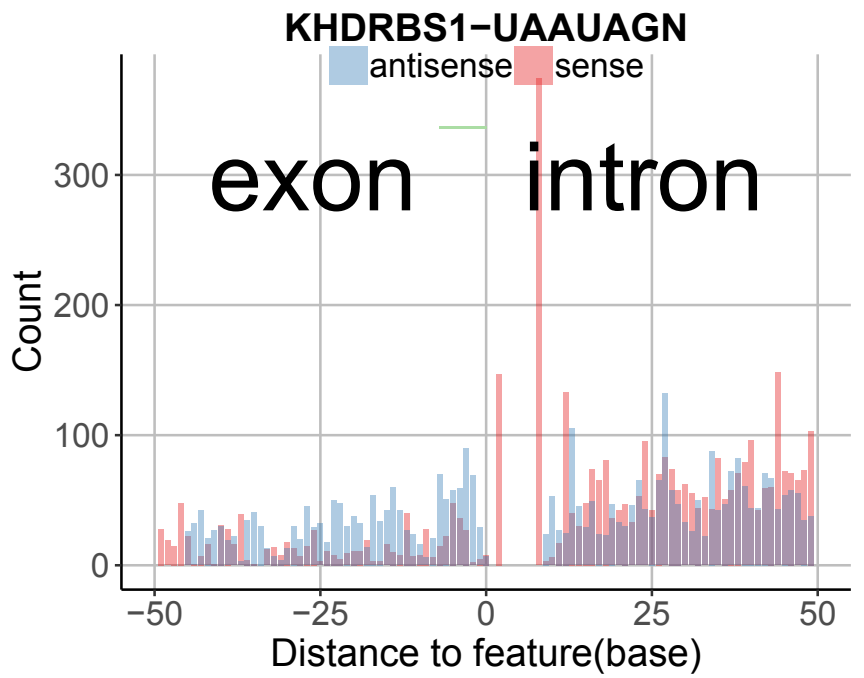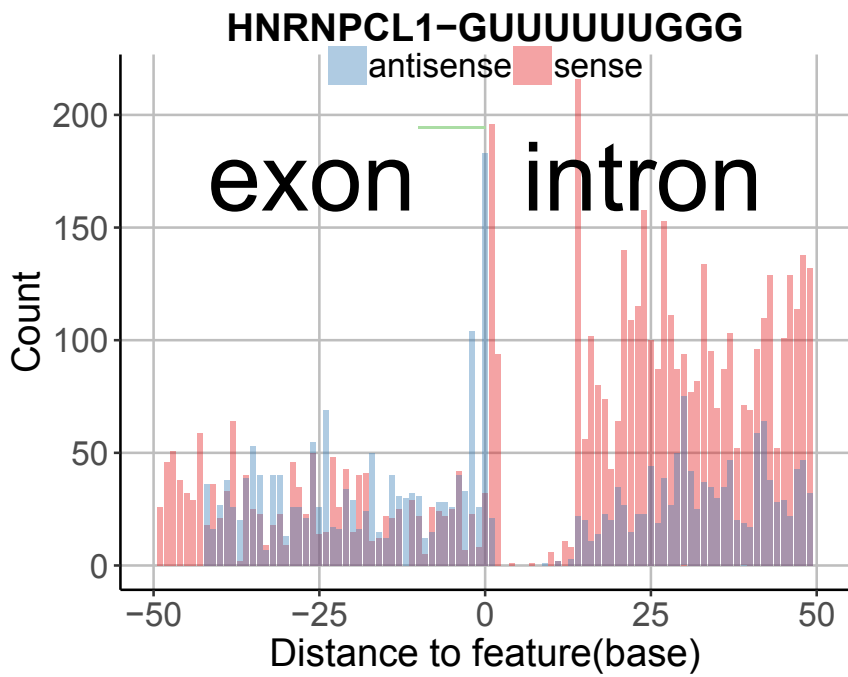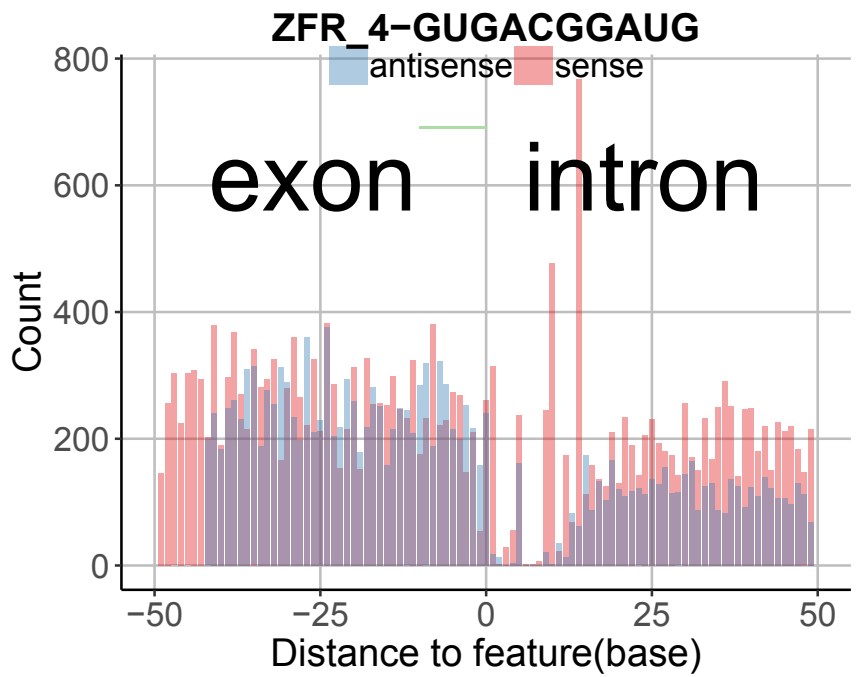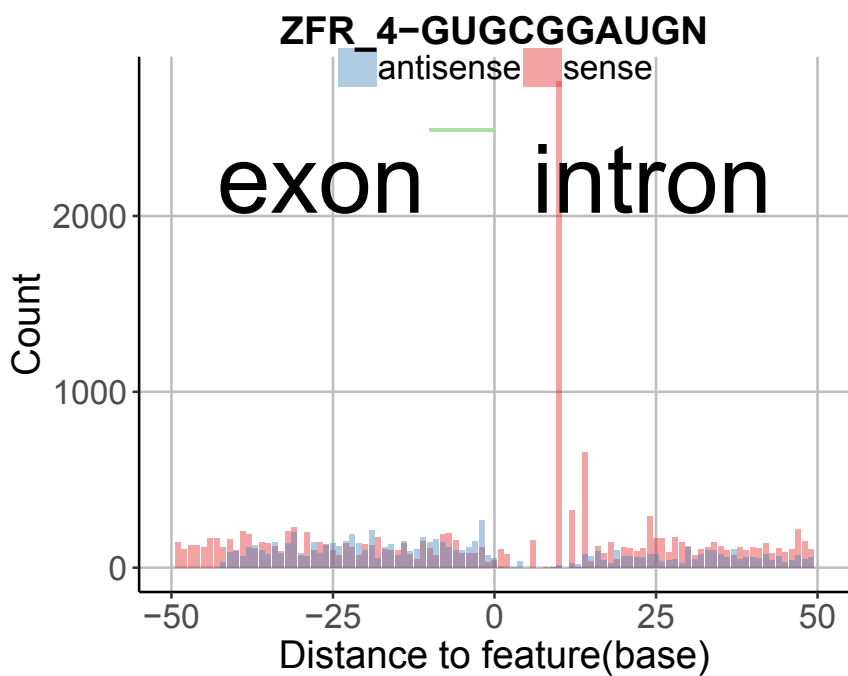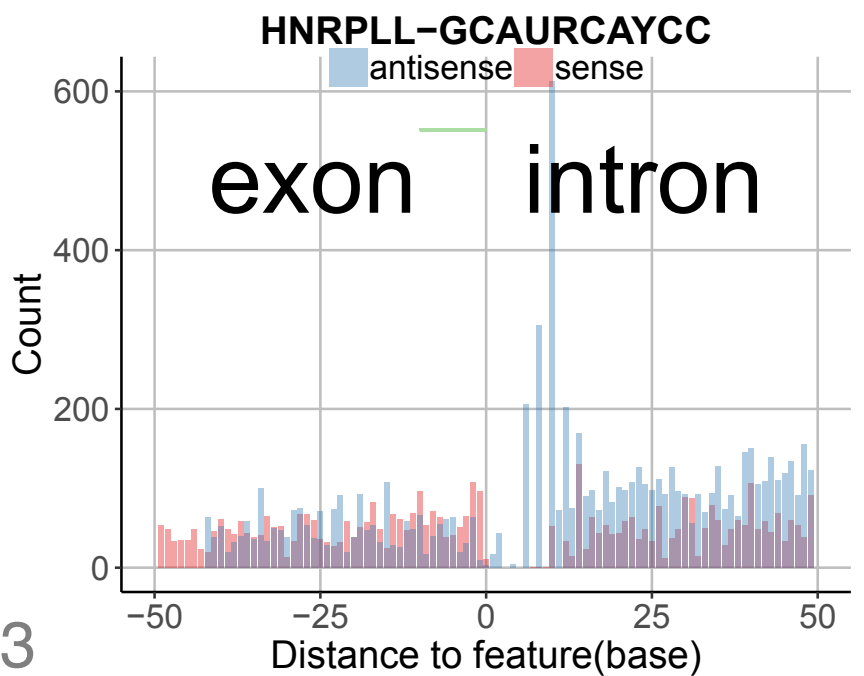

3

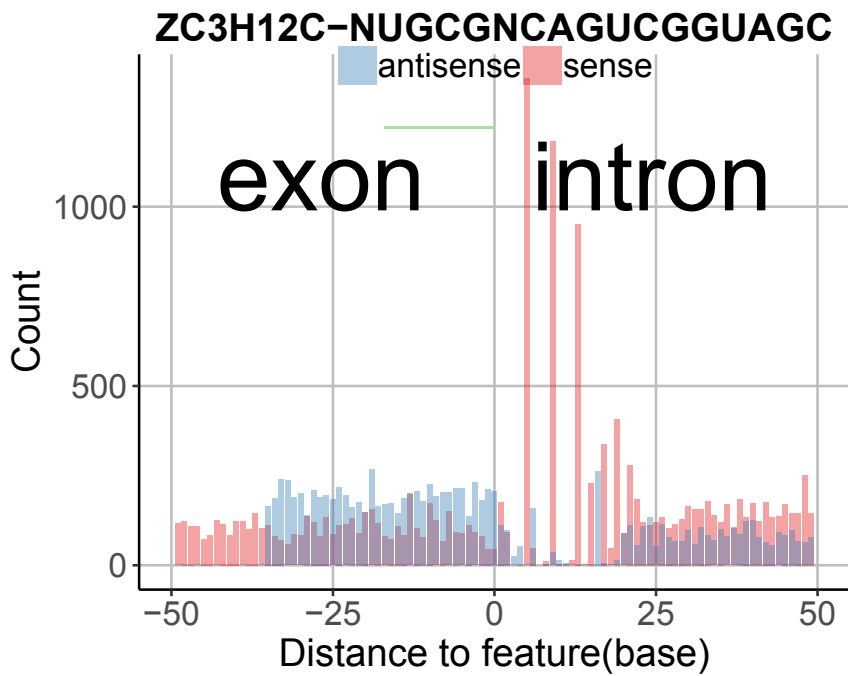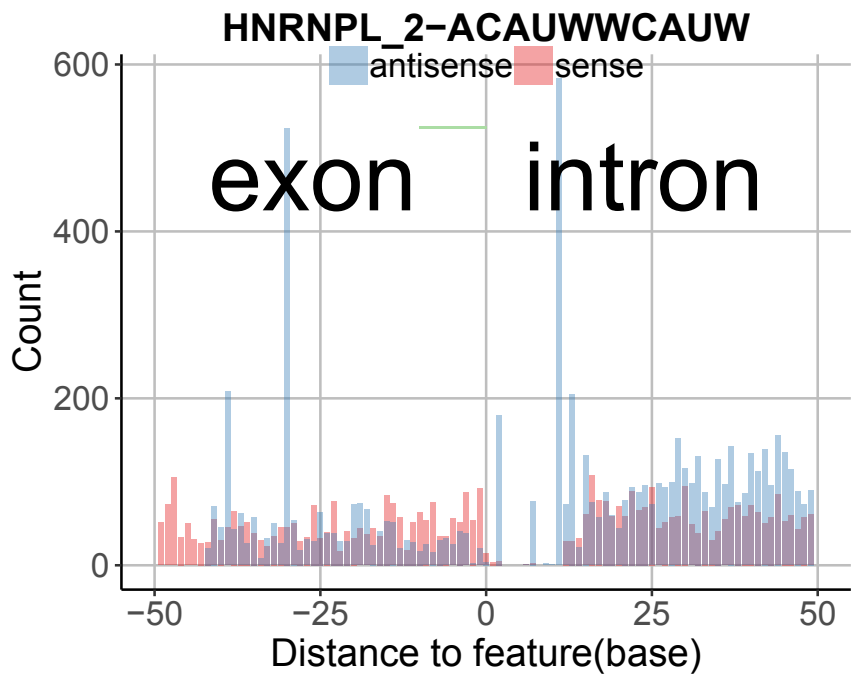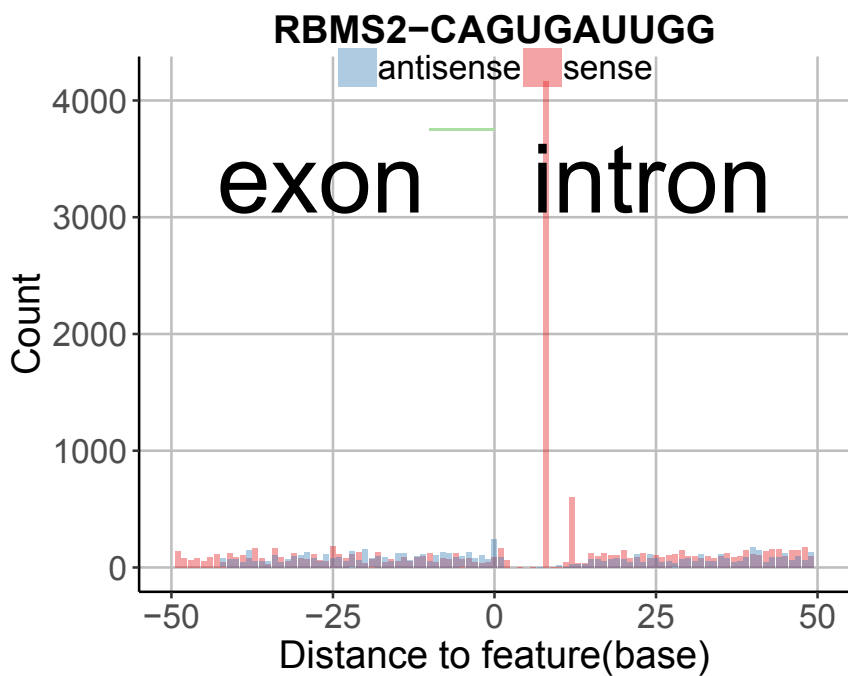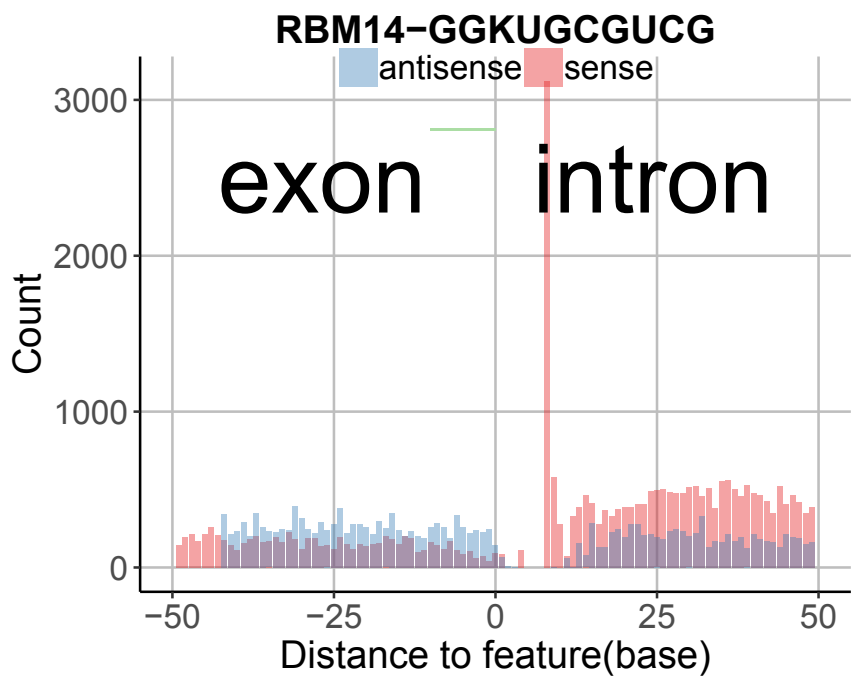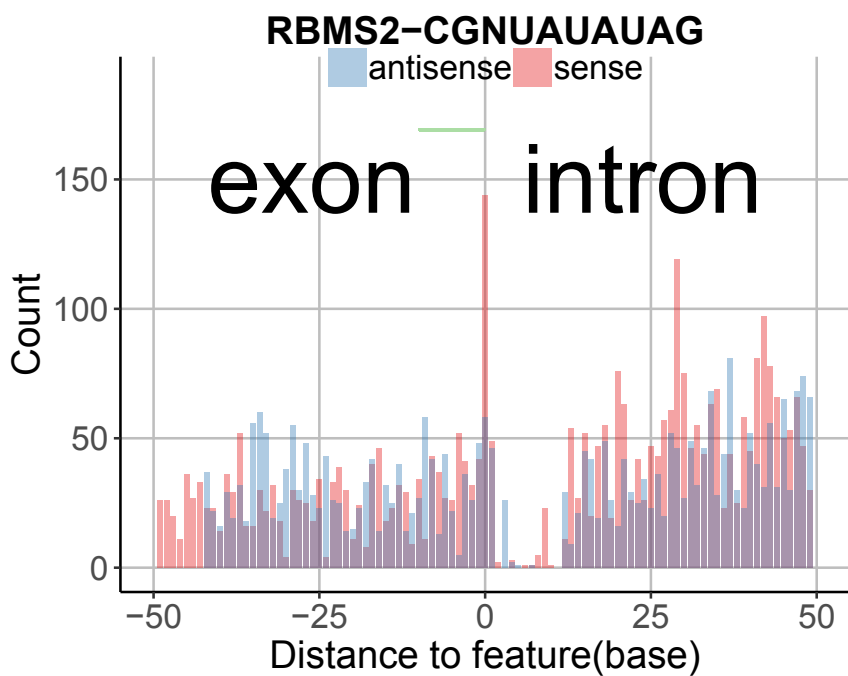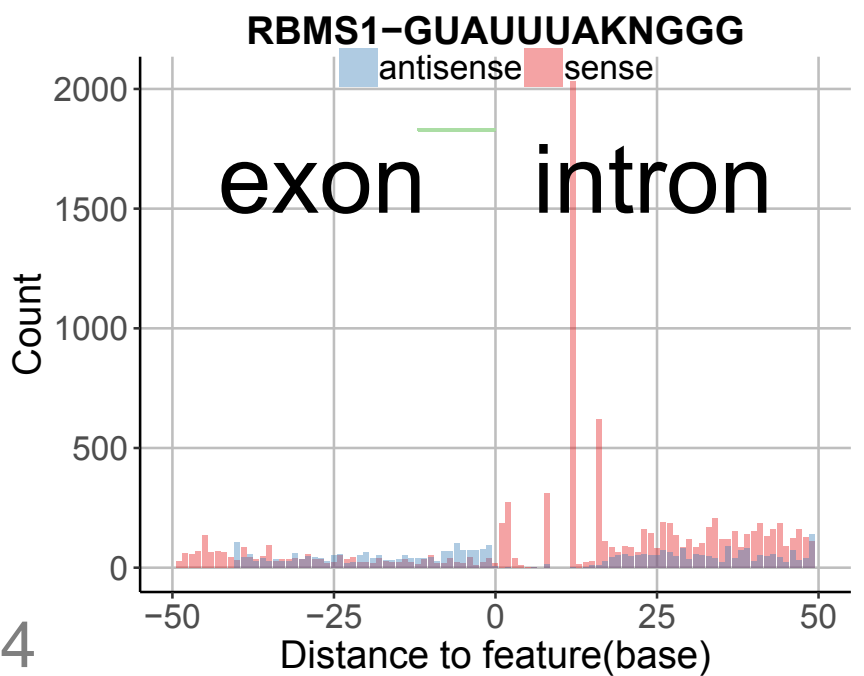

4

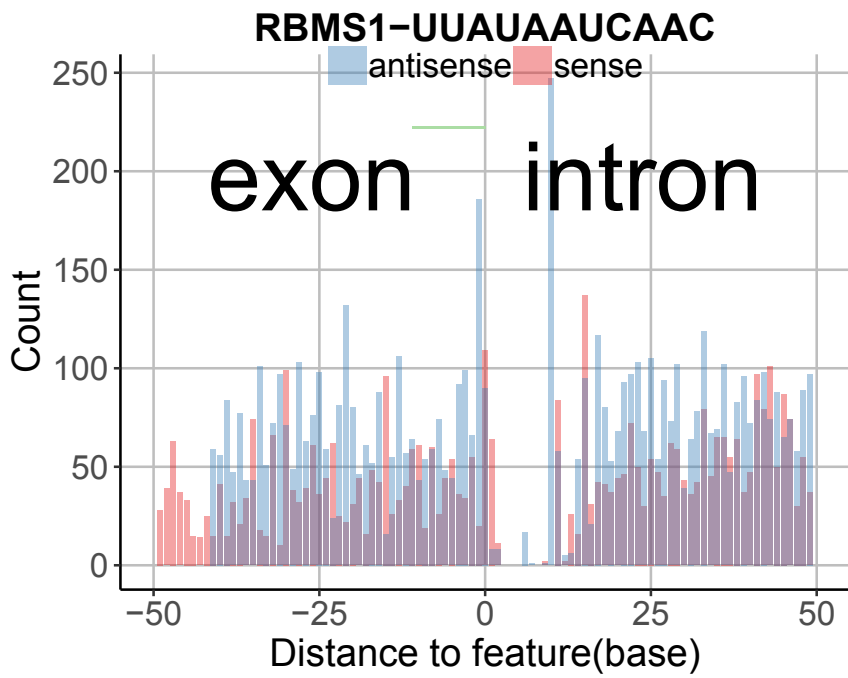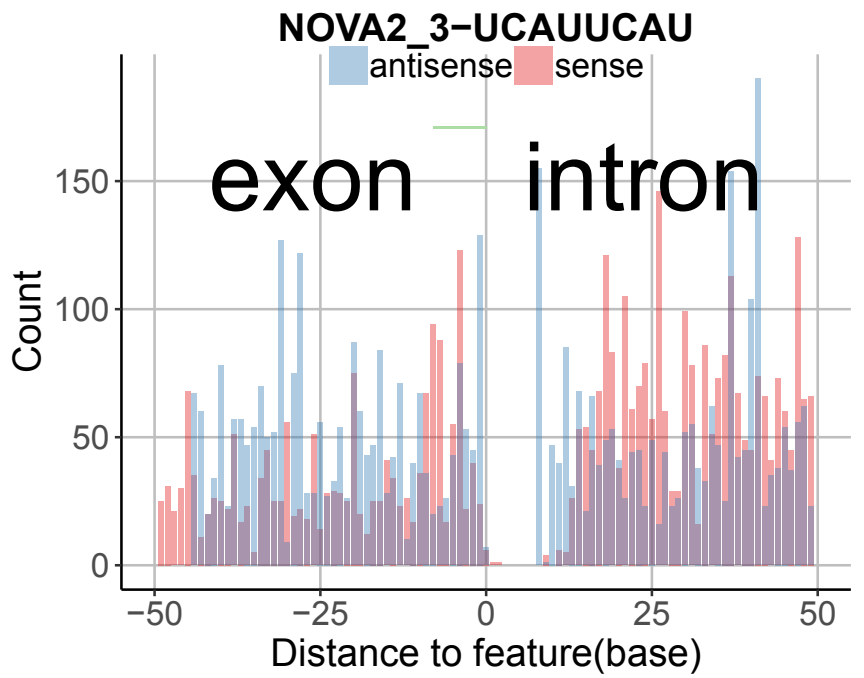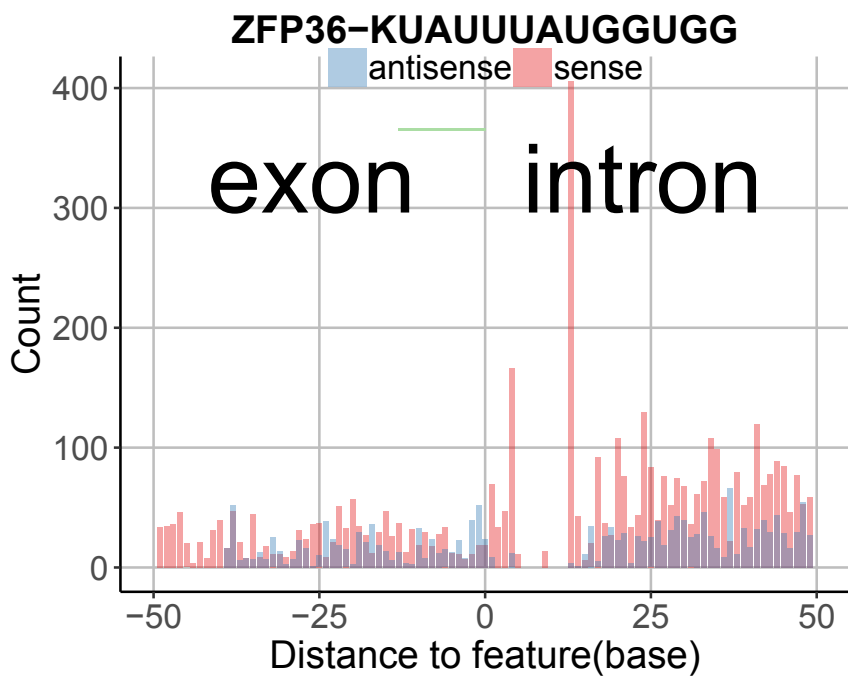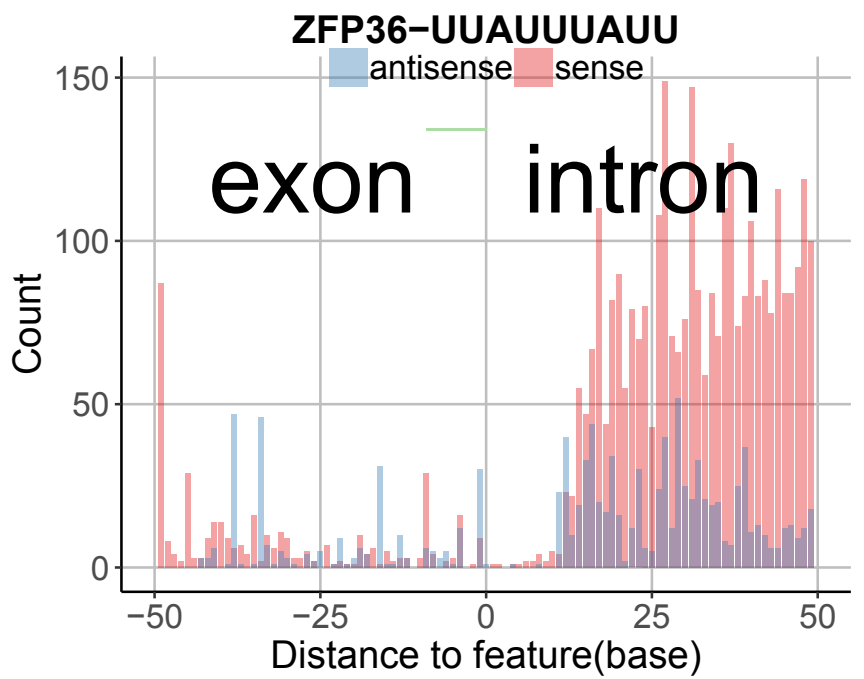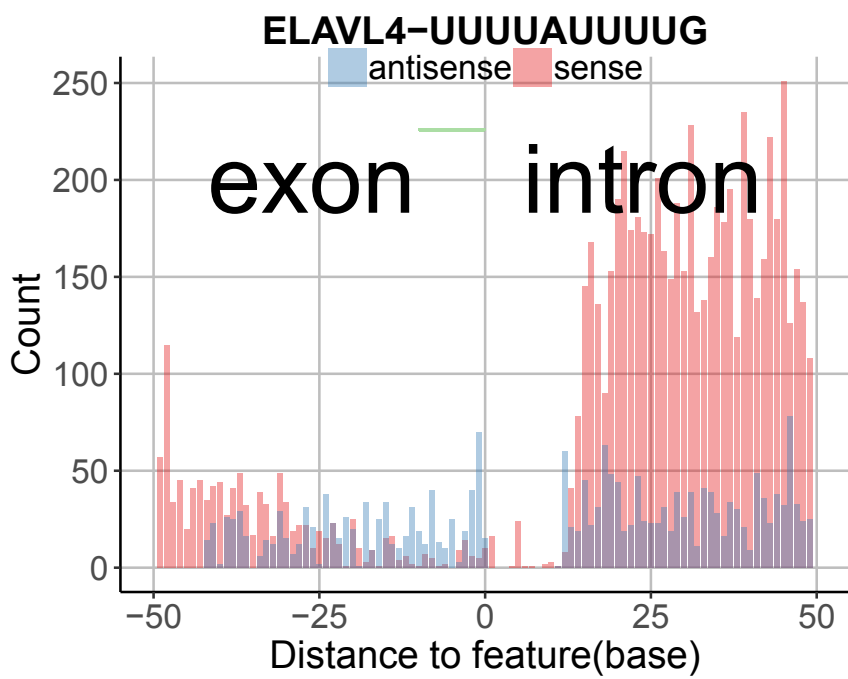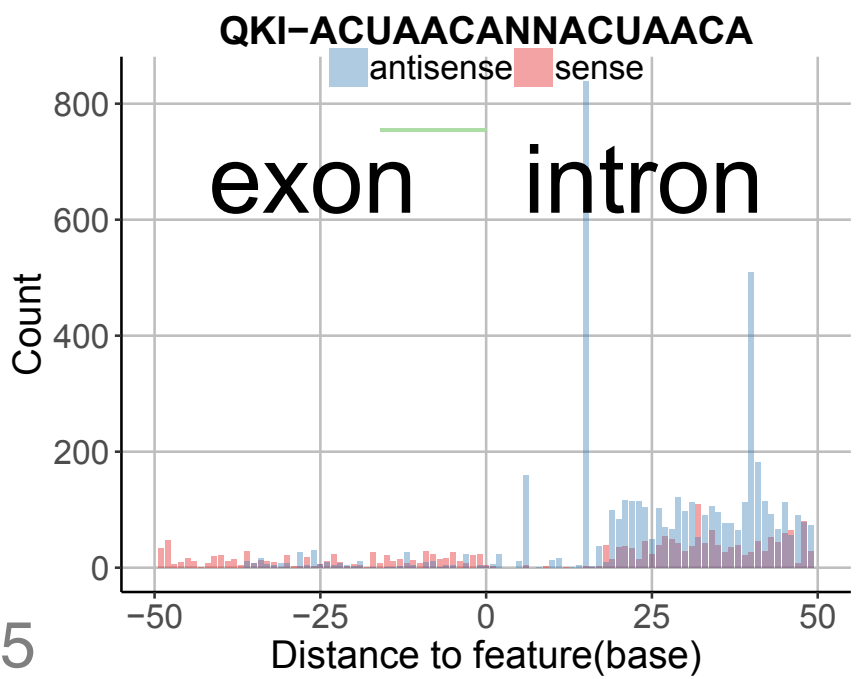

5

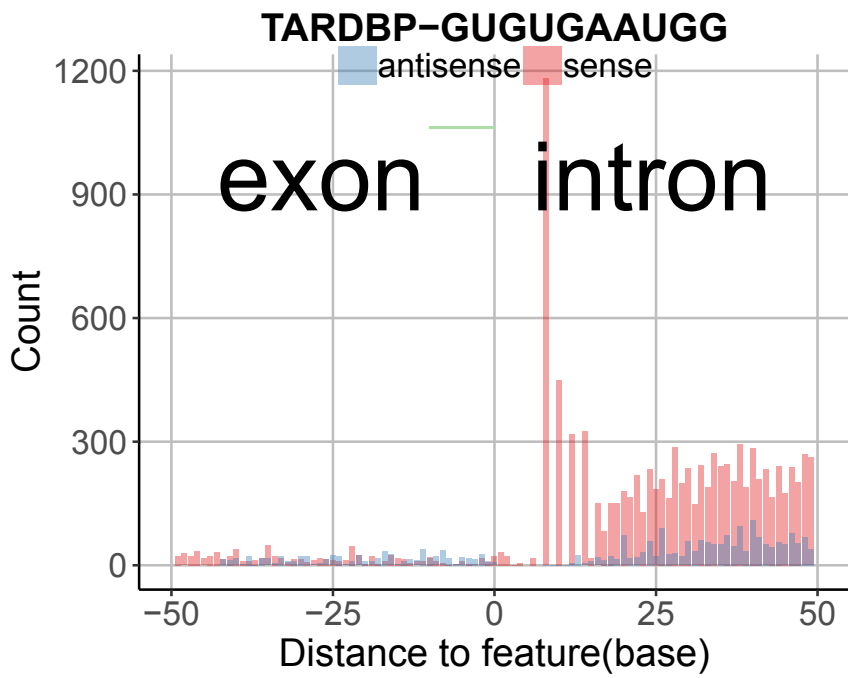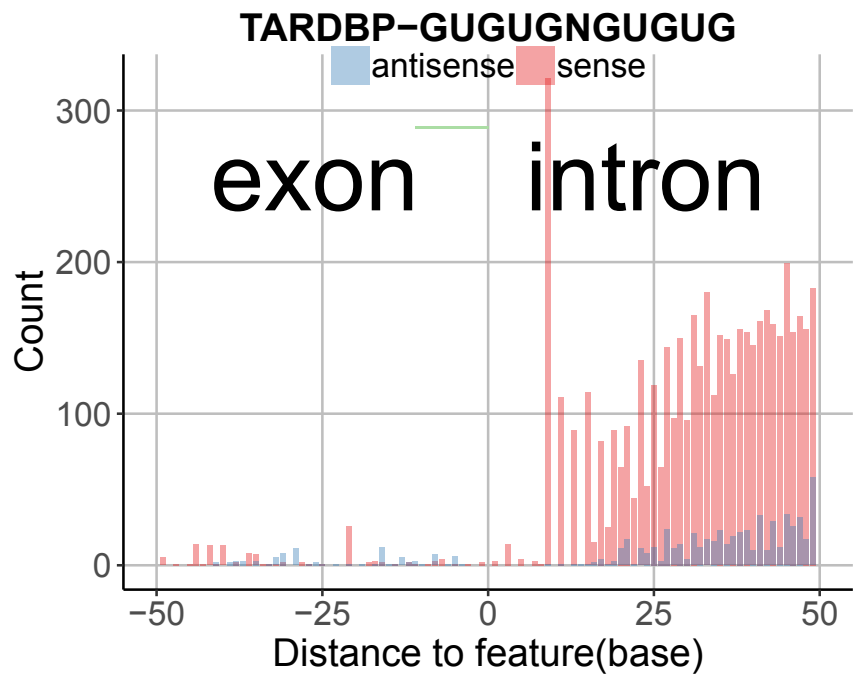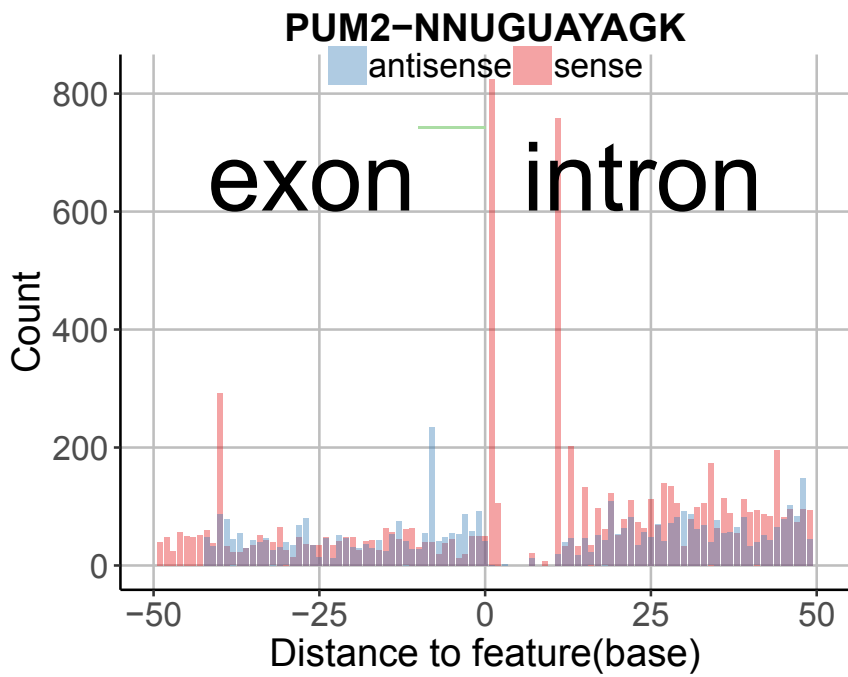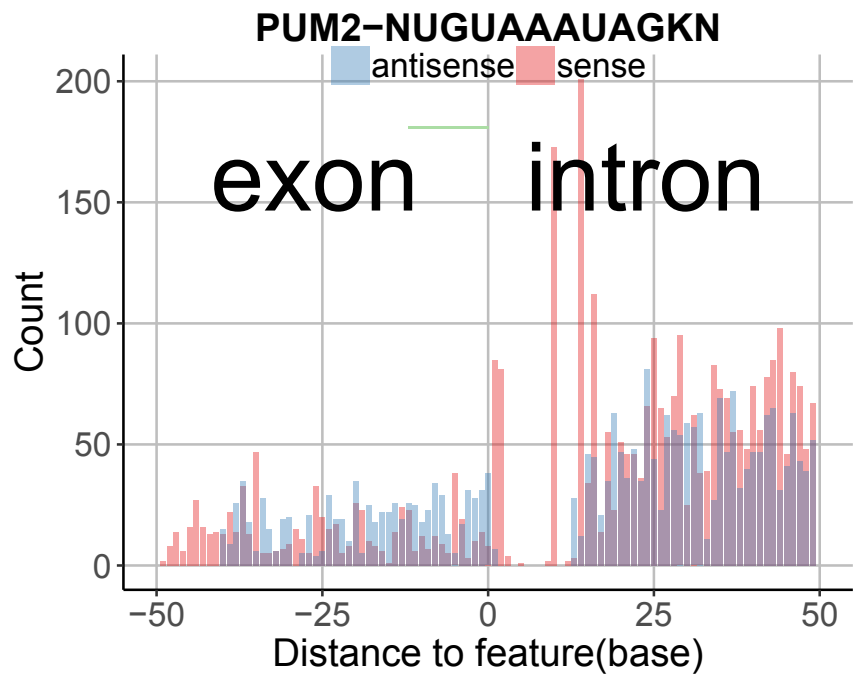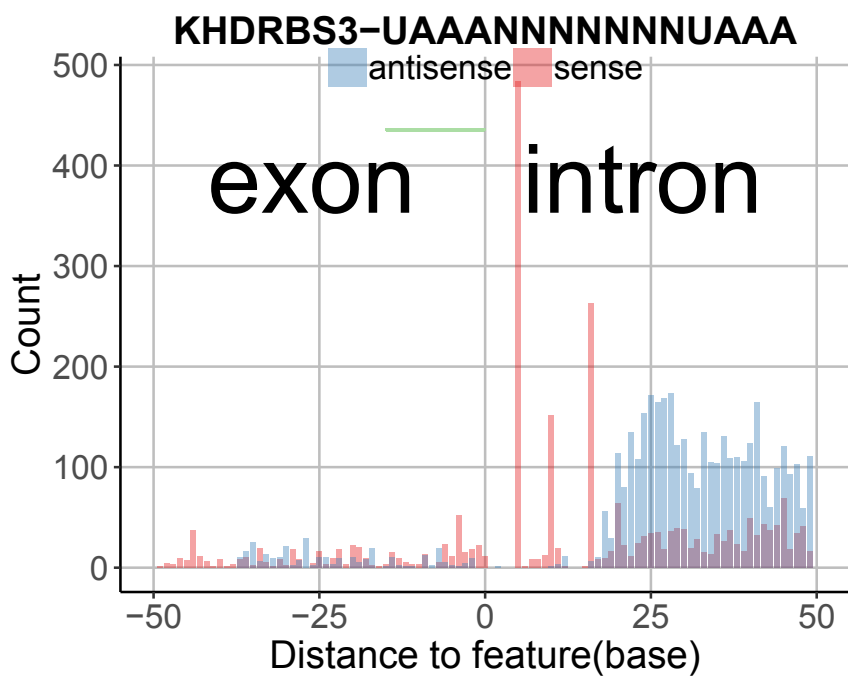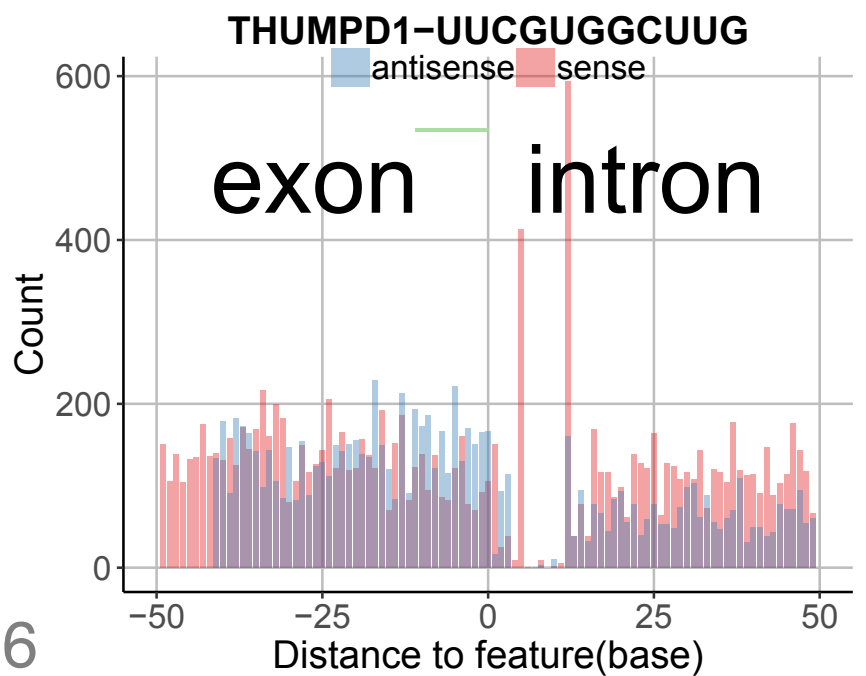

6

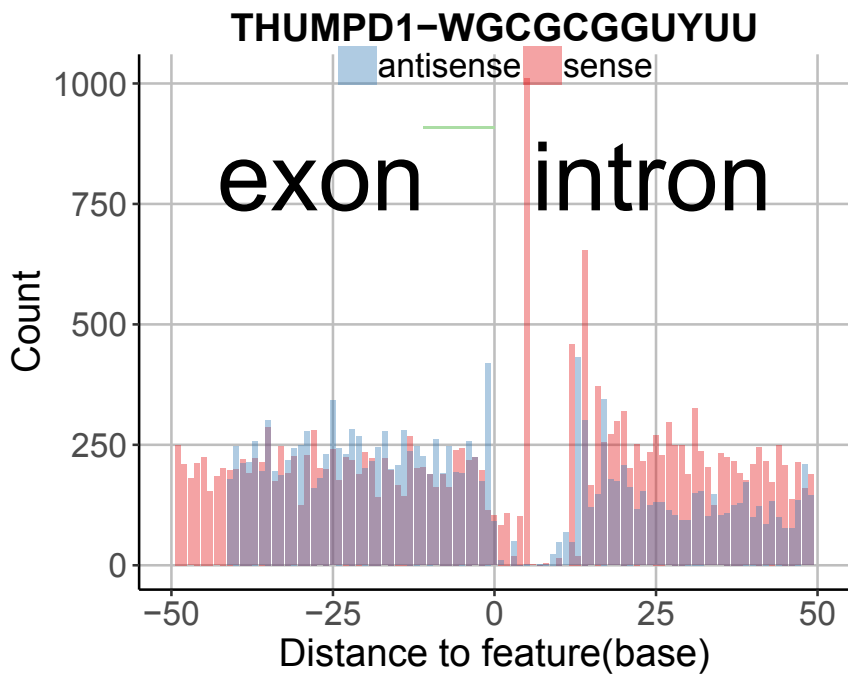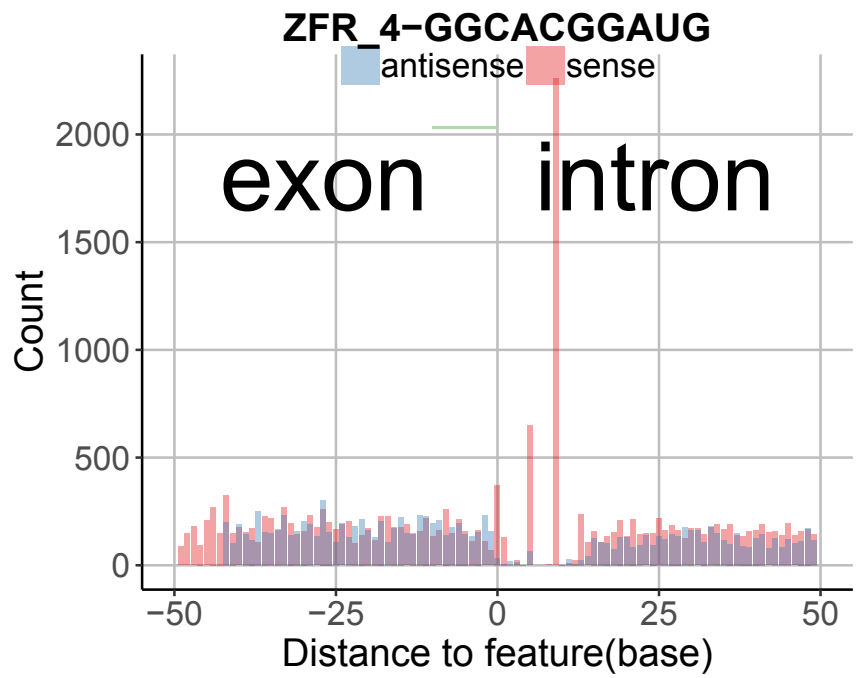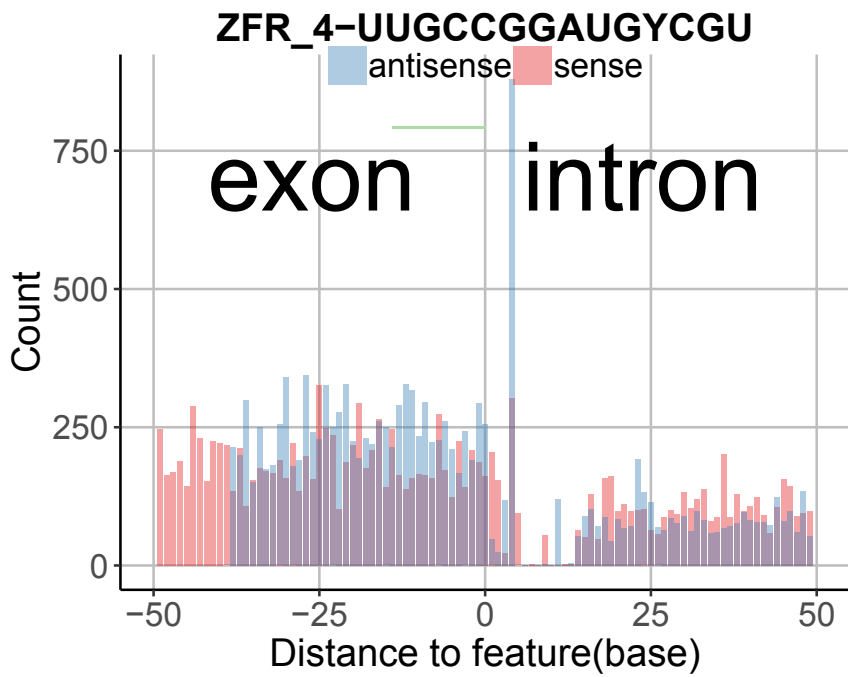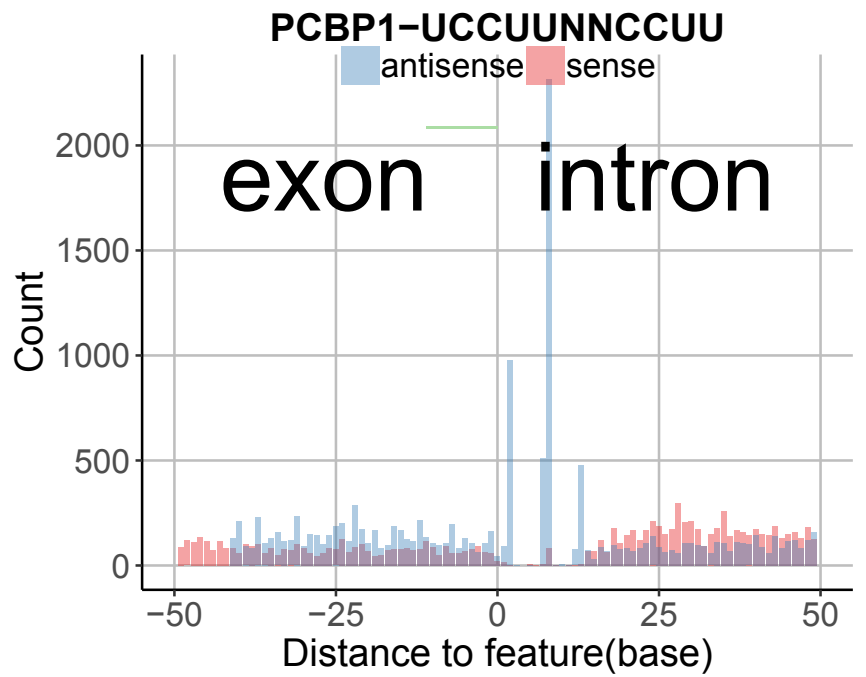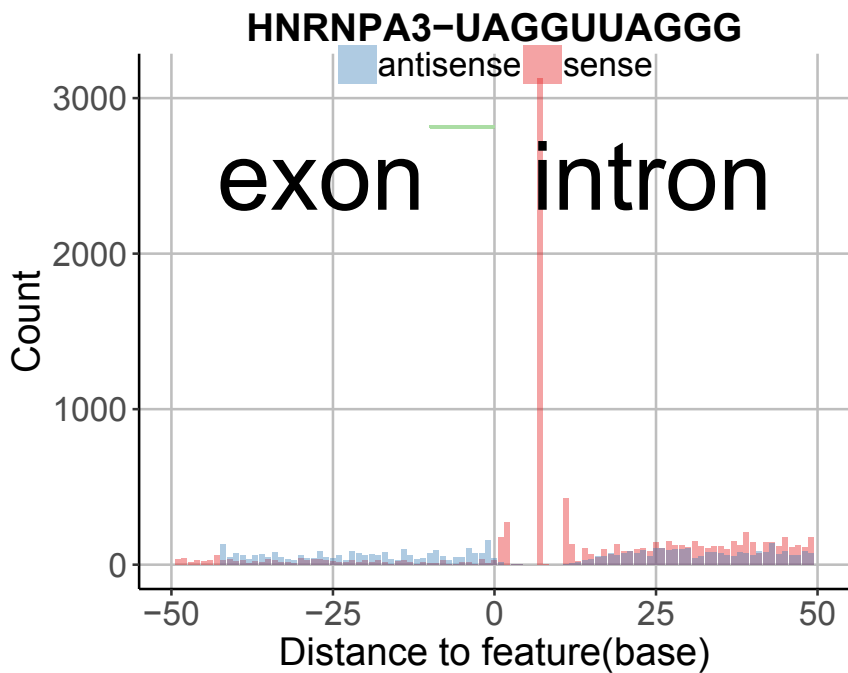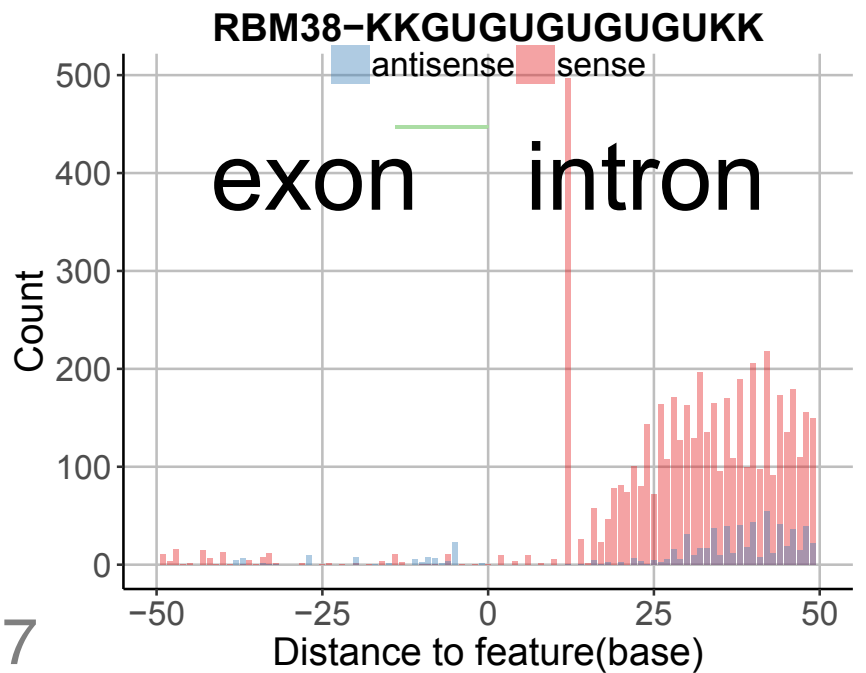

7



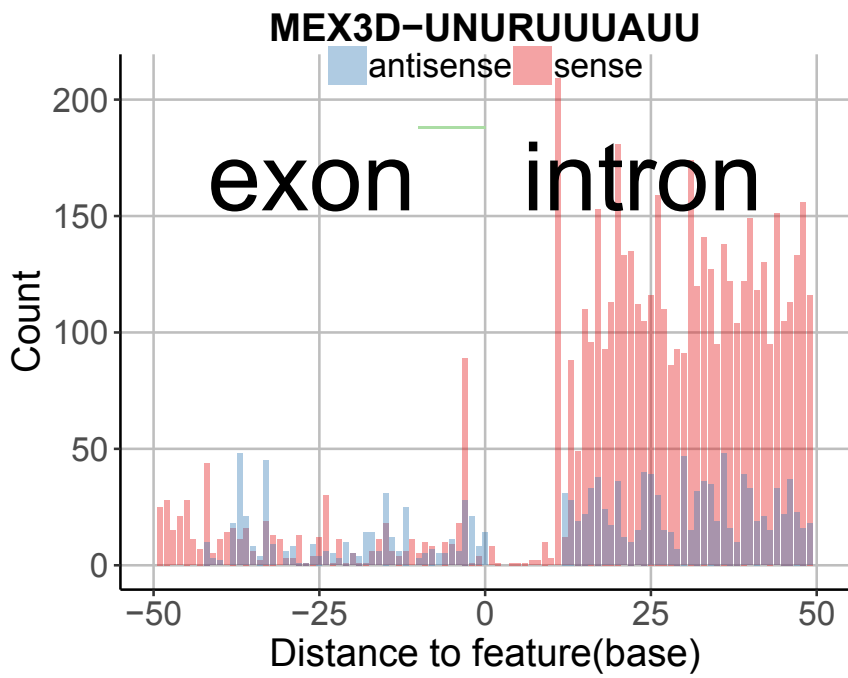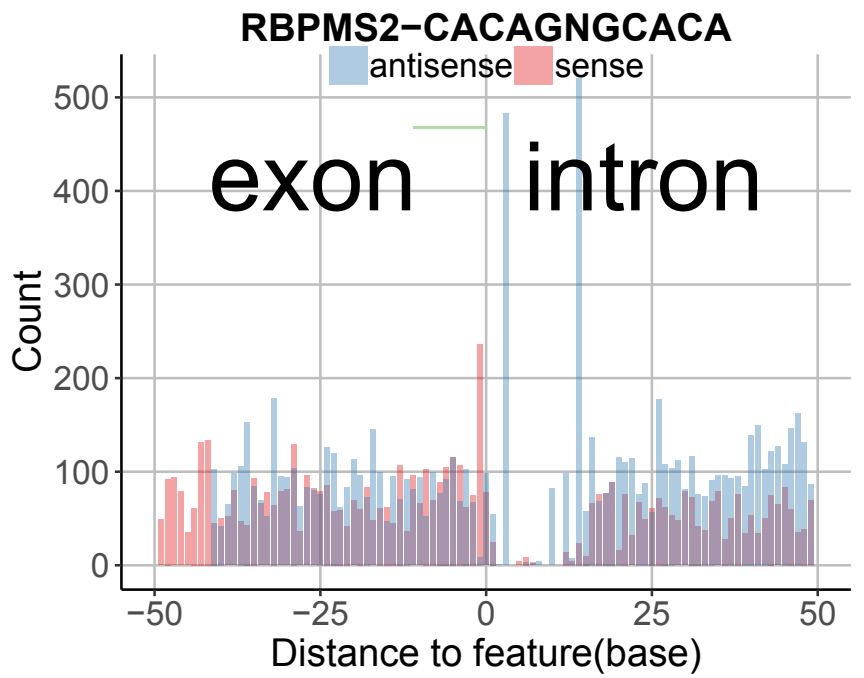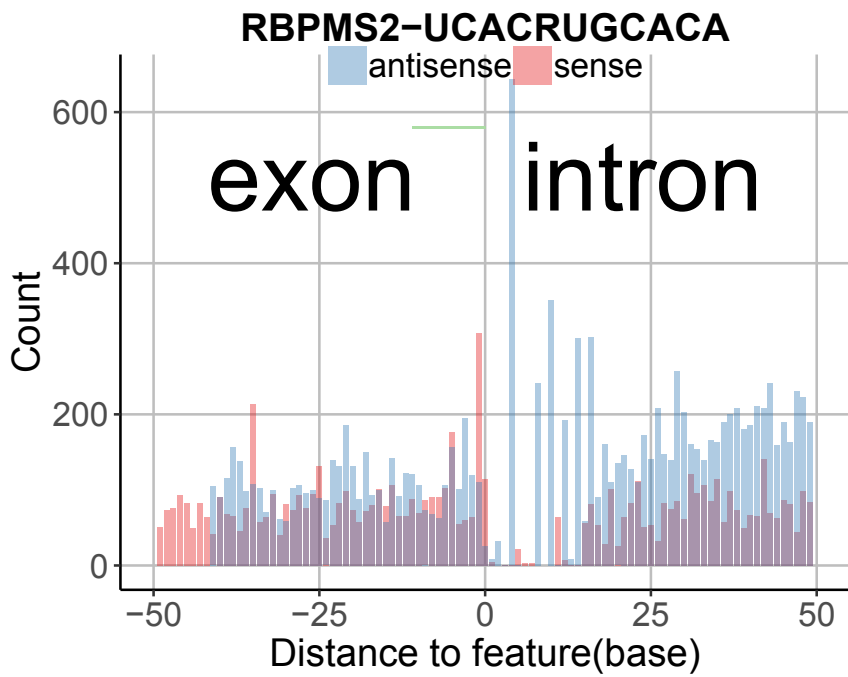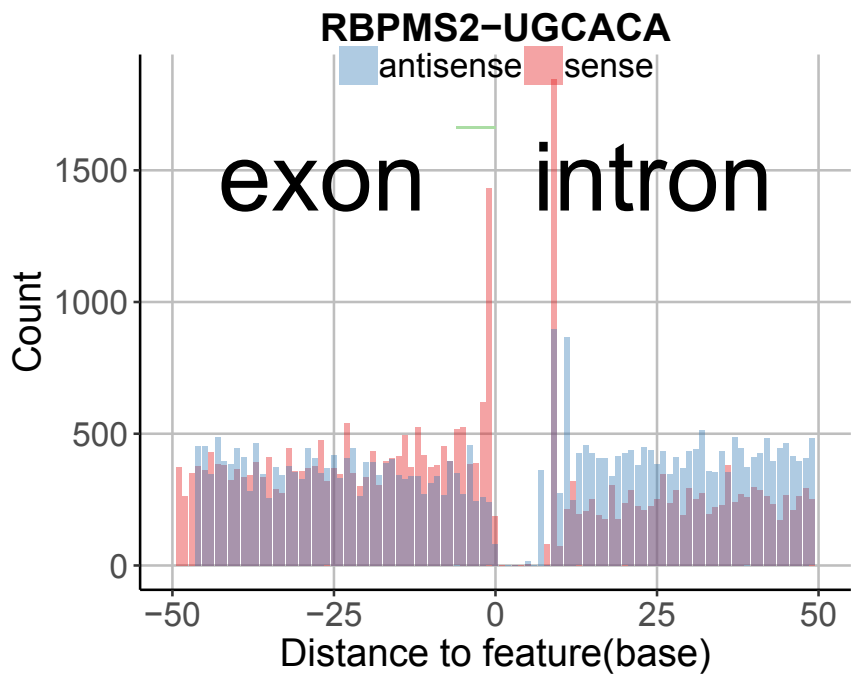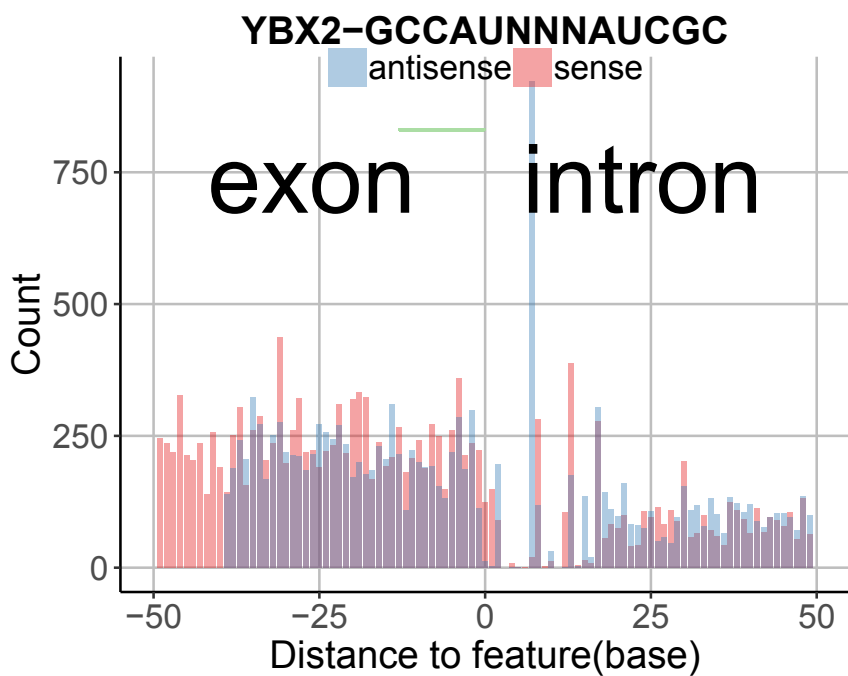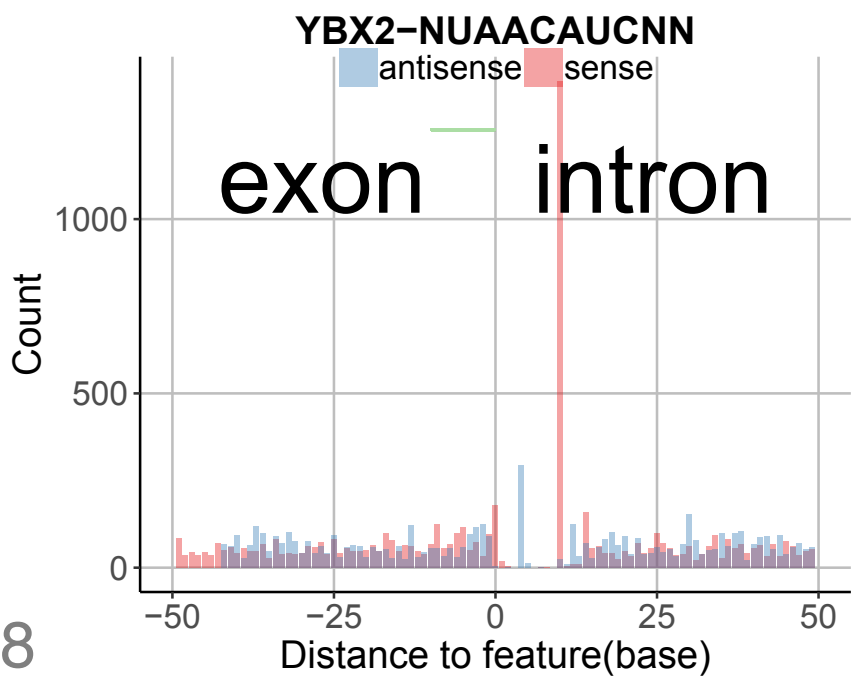

8

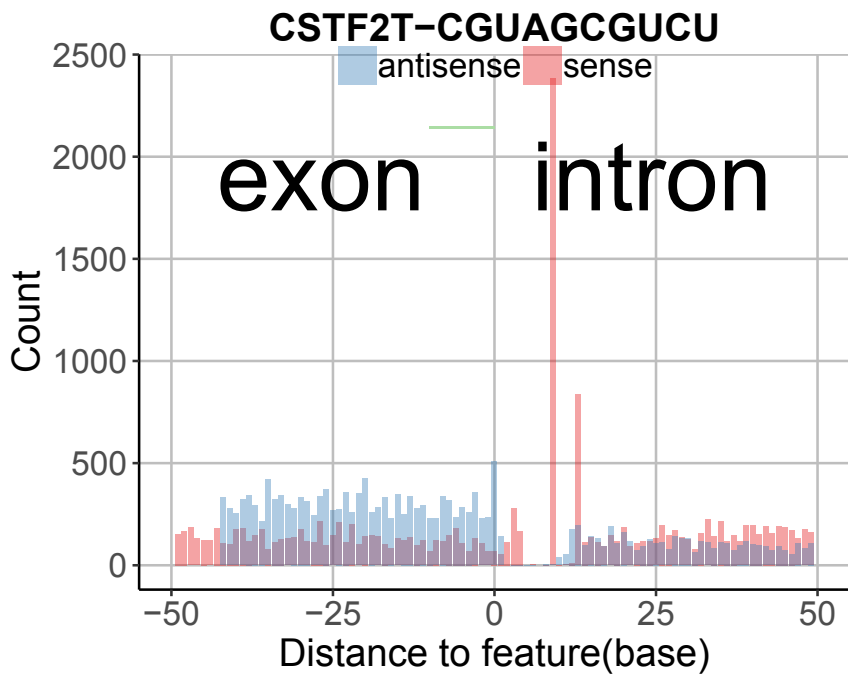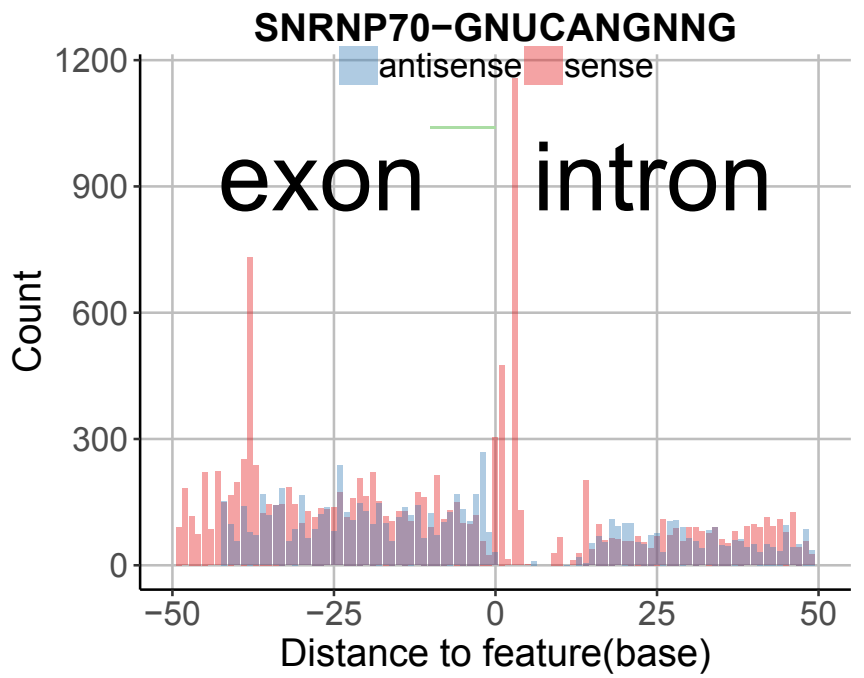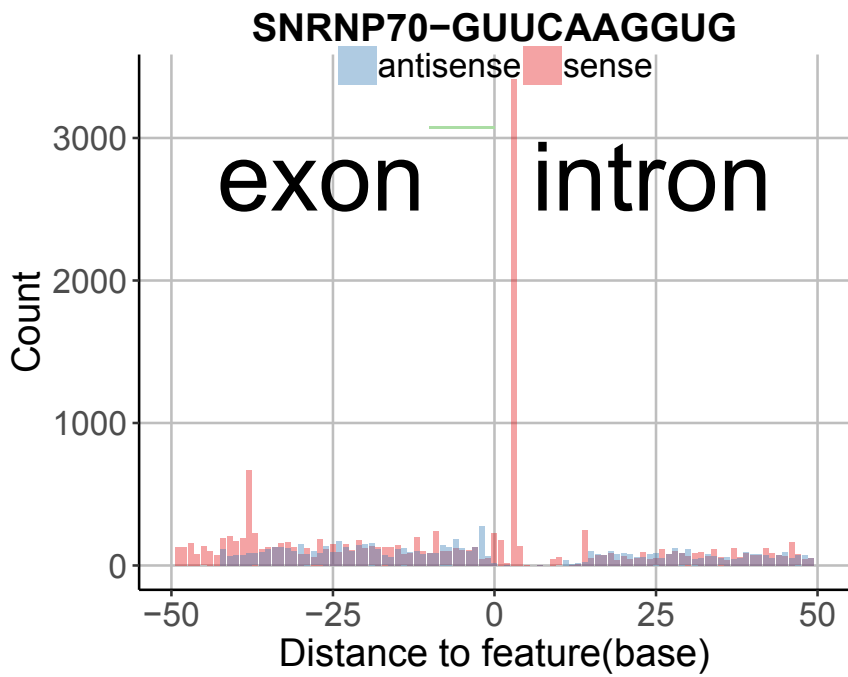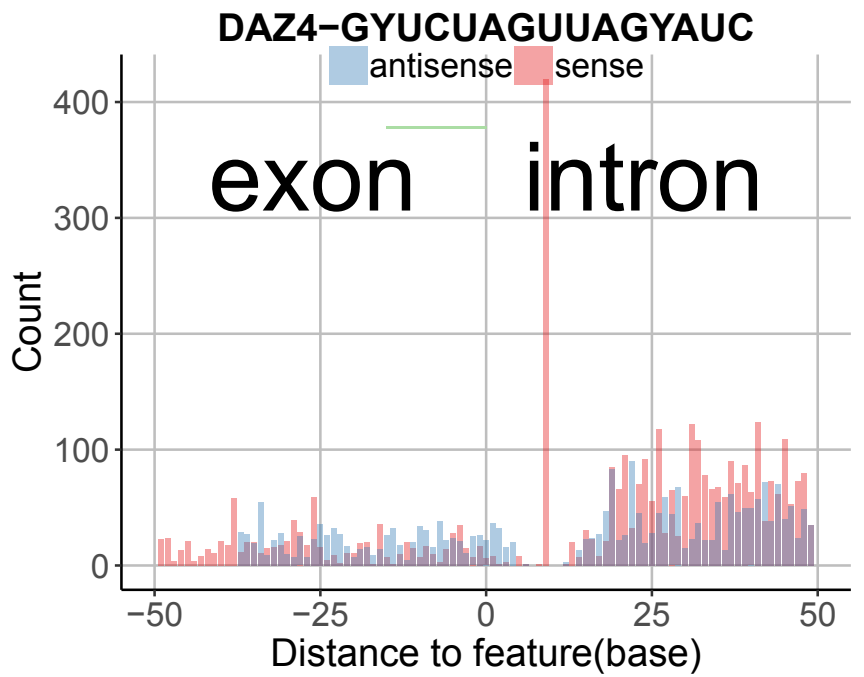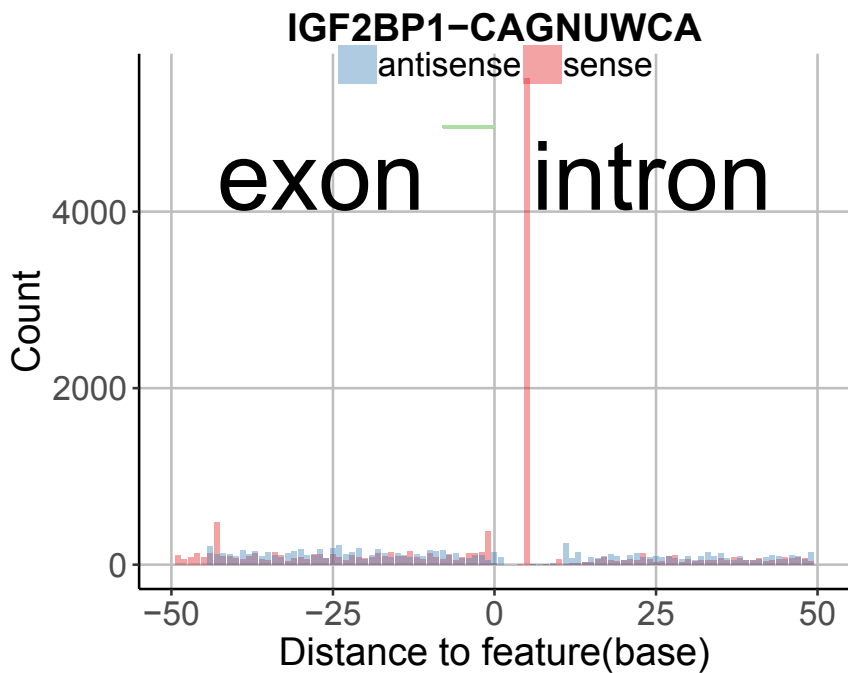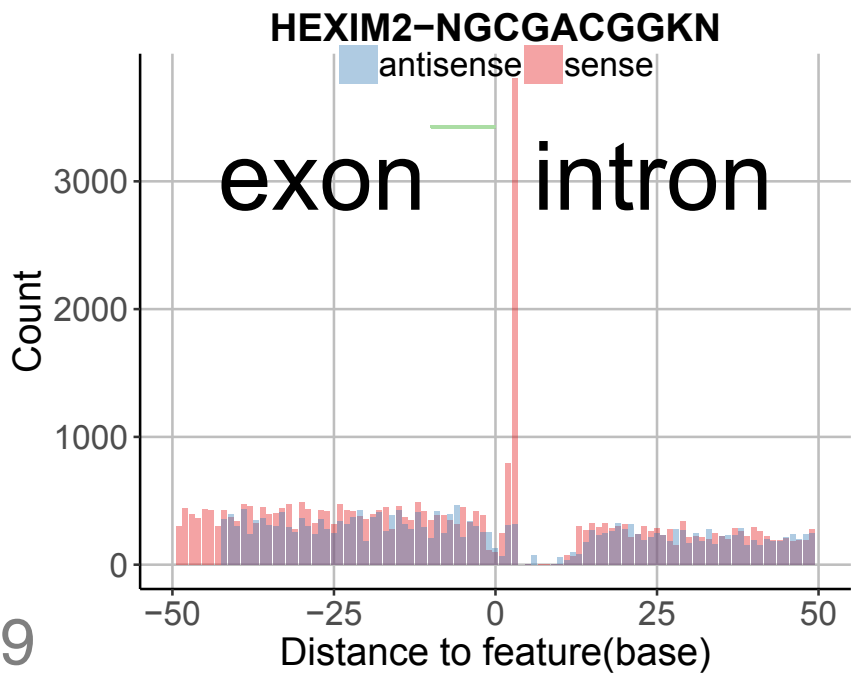

9

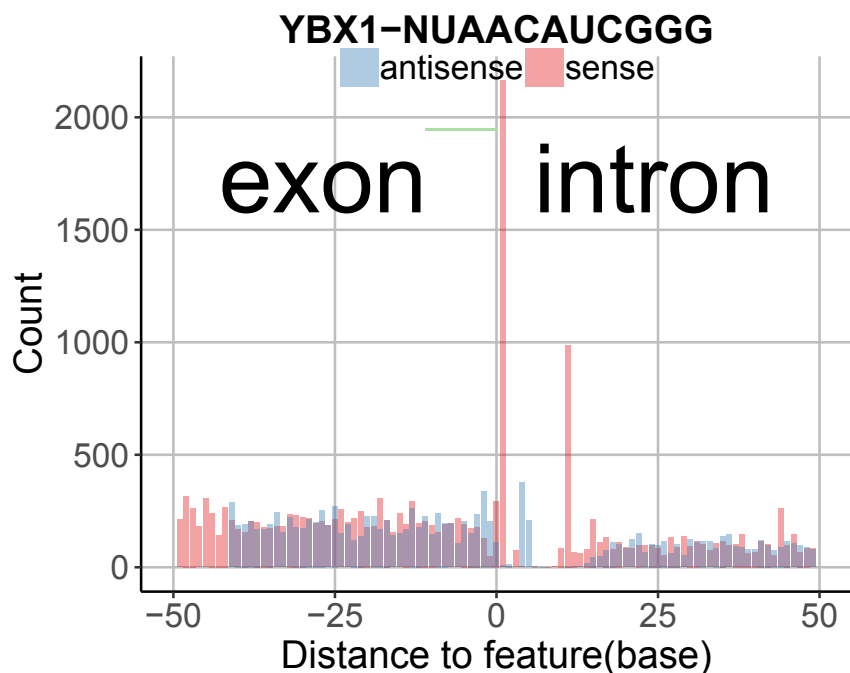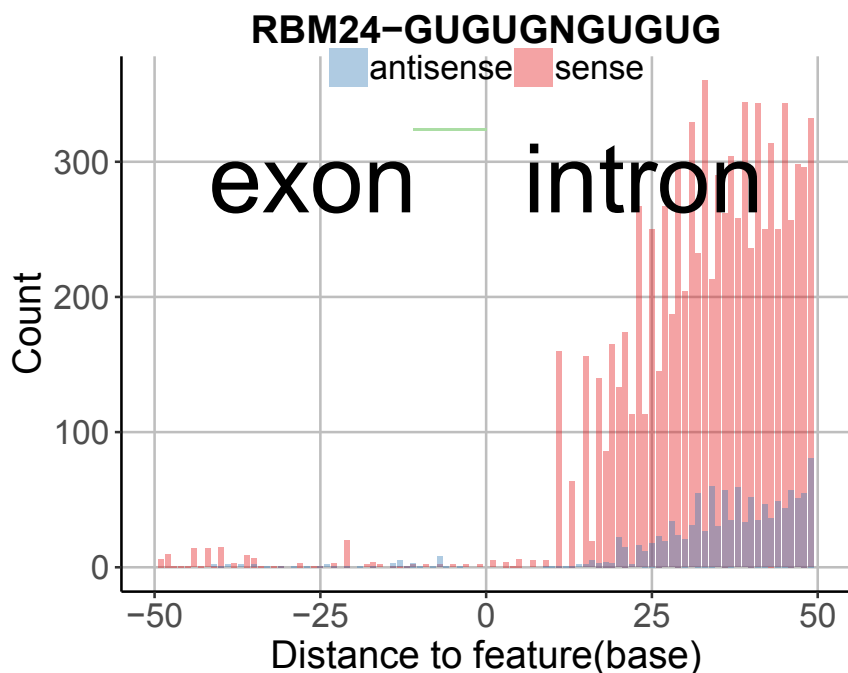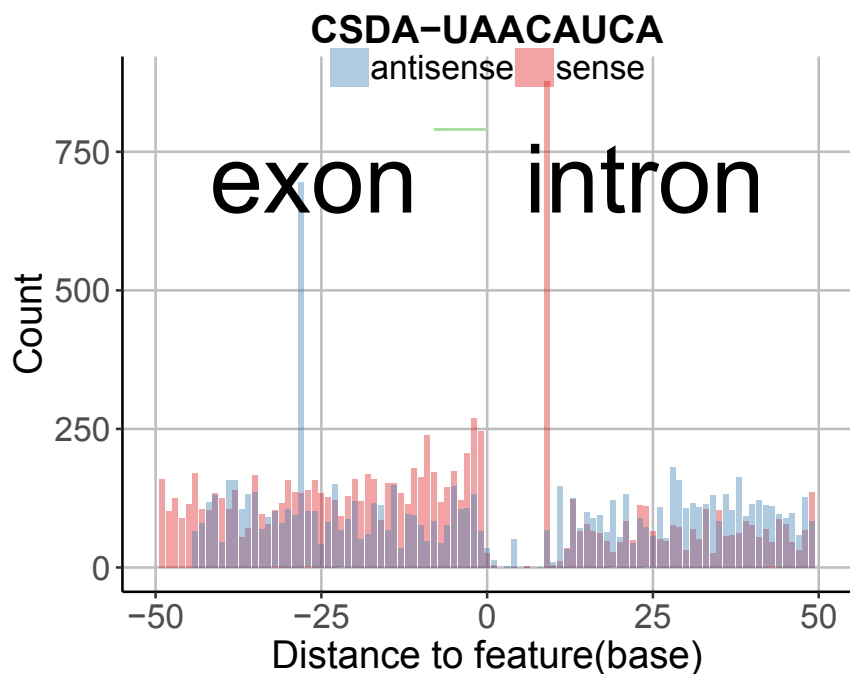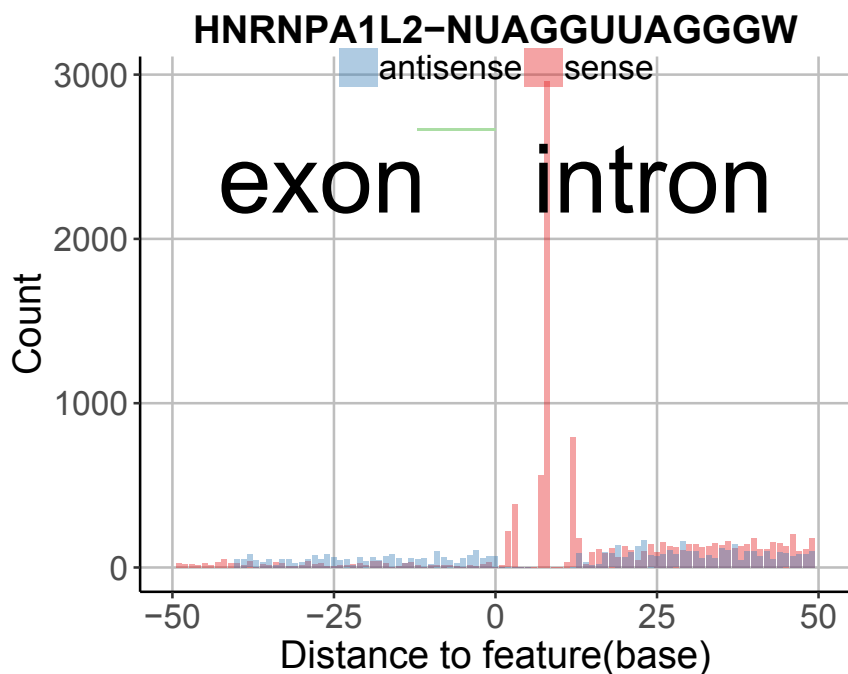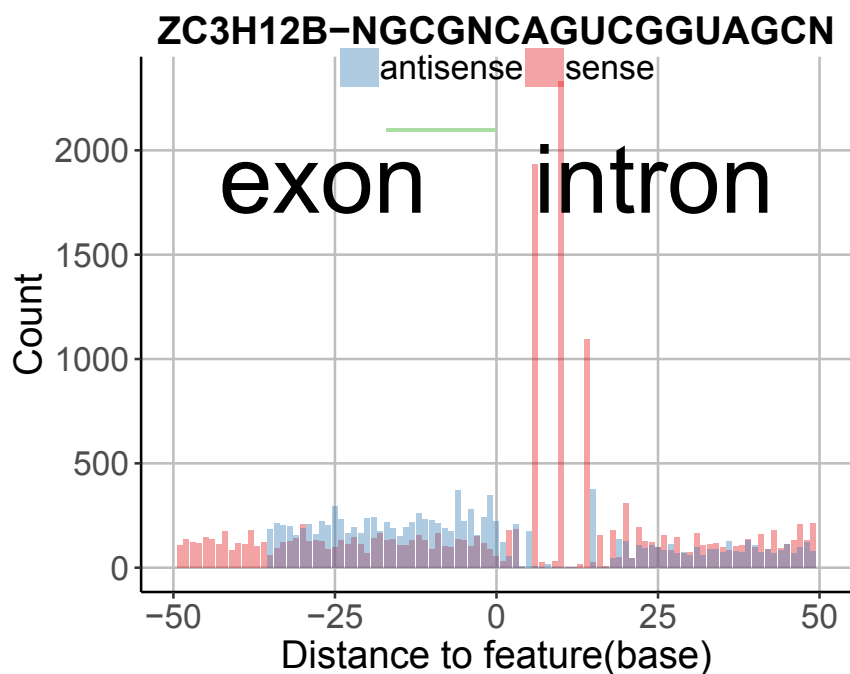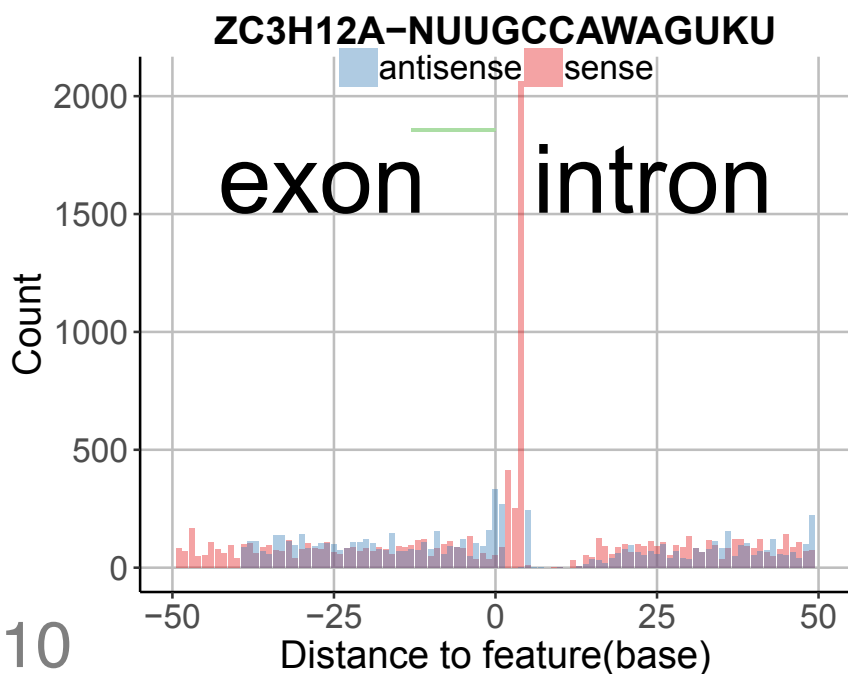

10

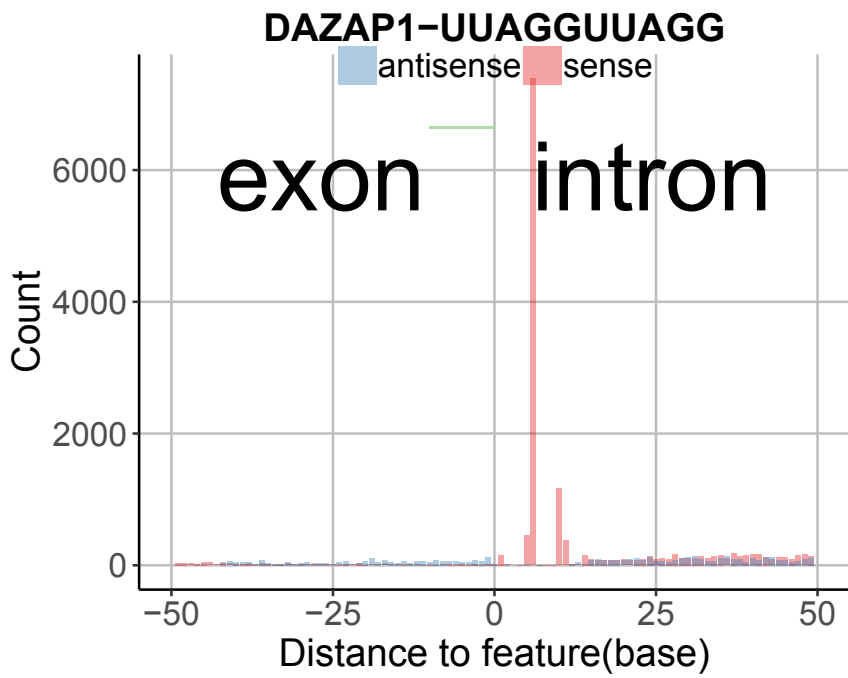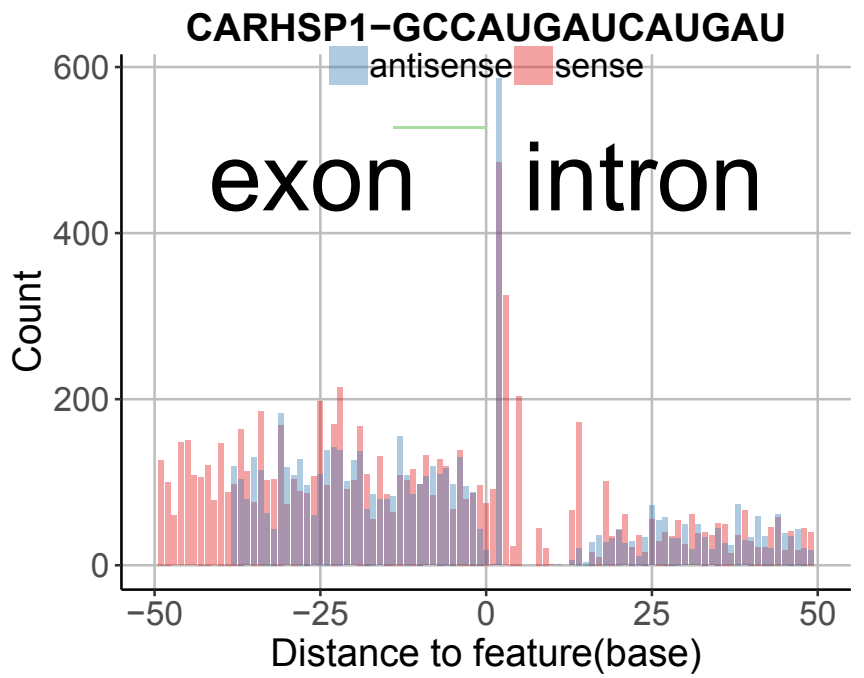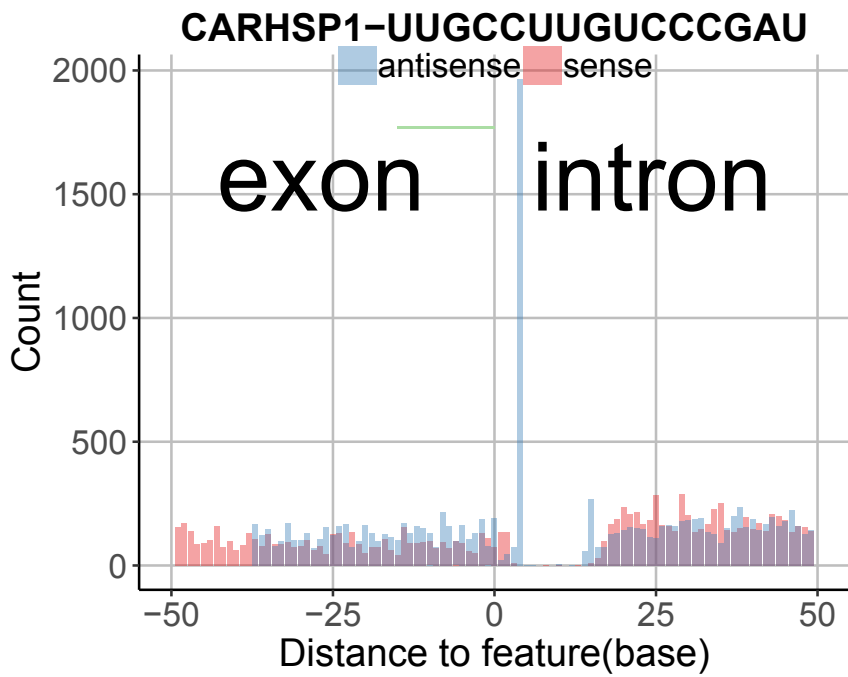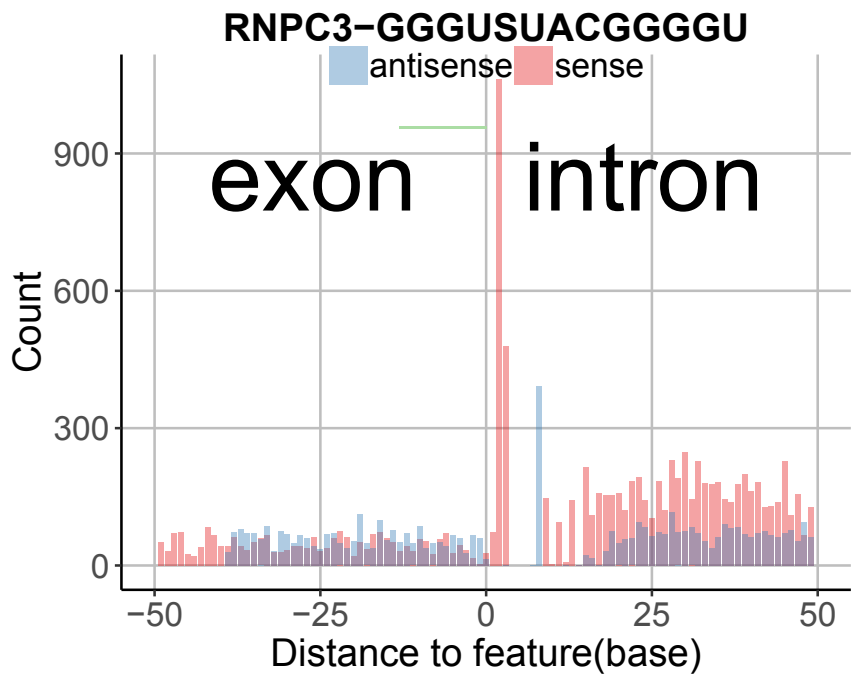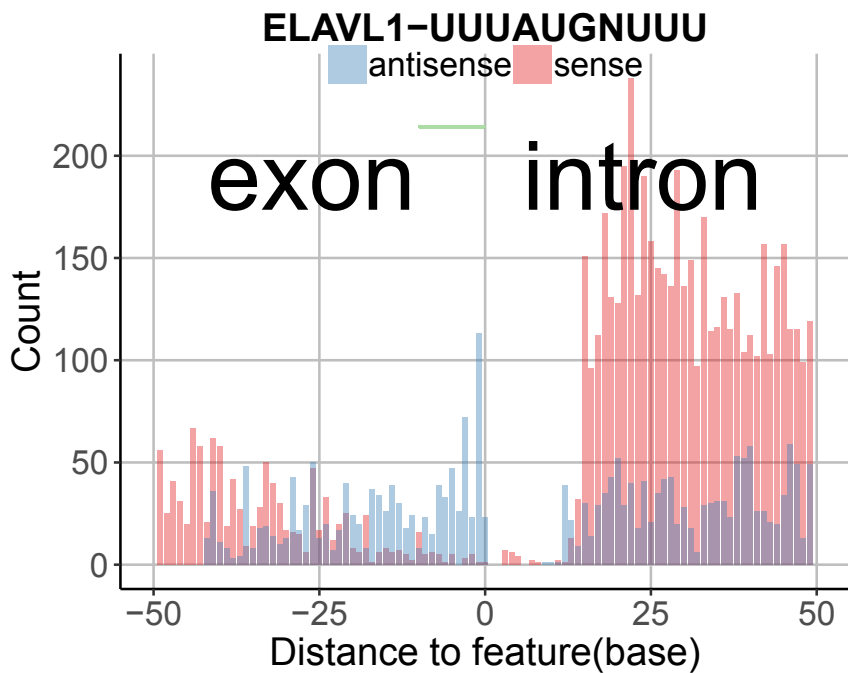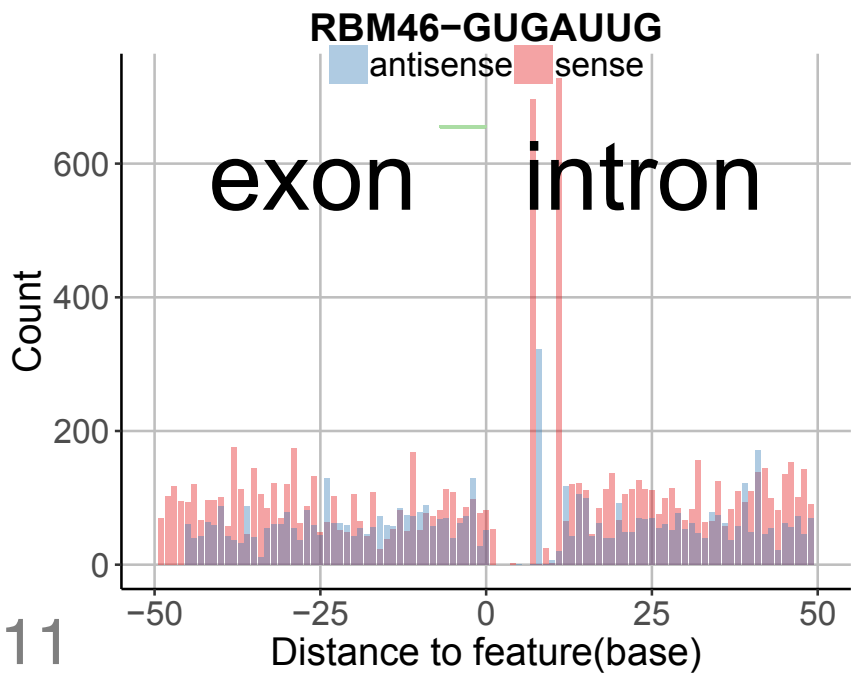

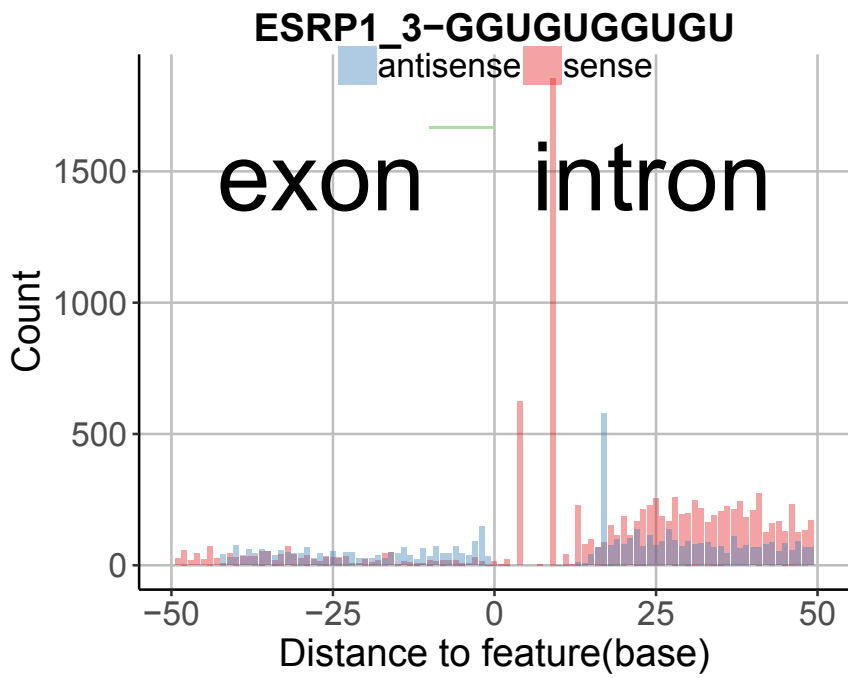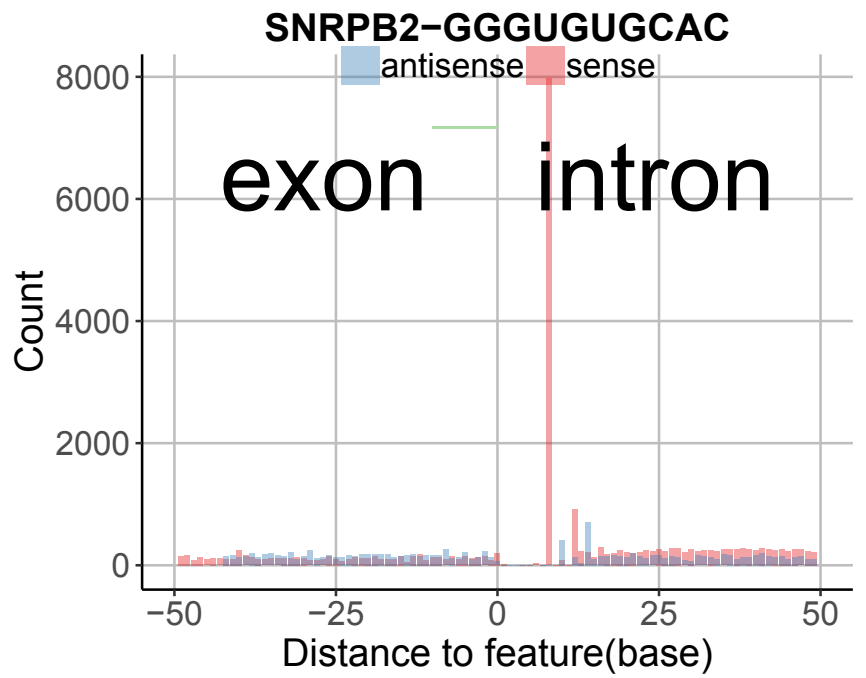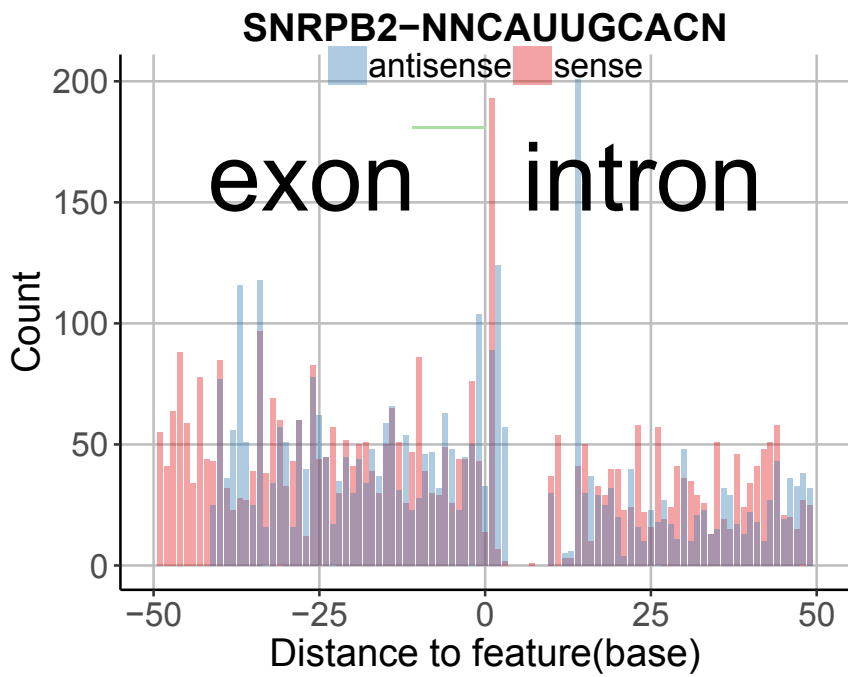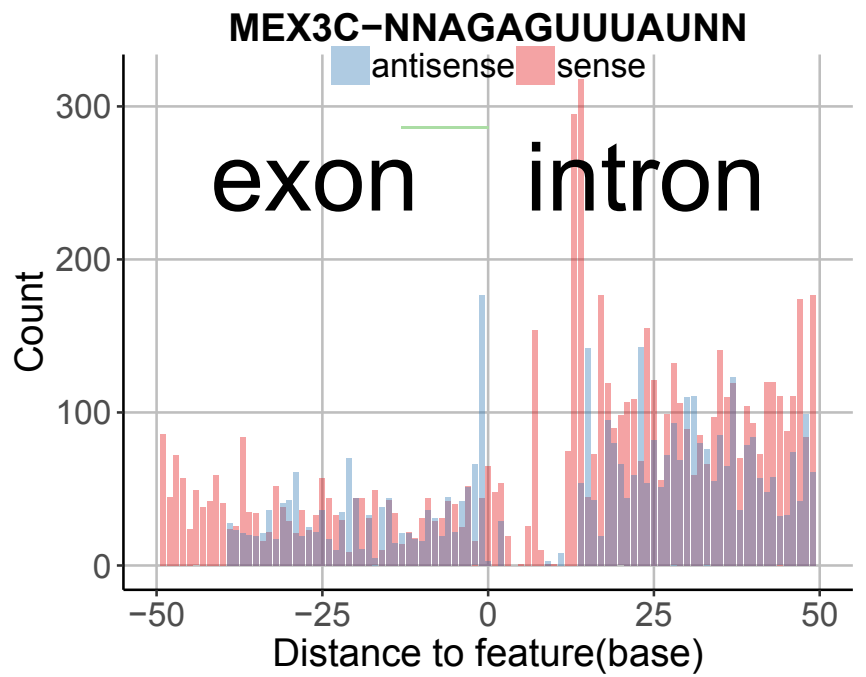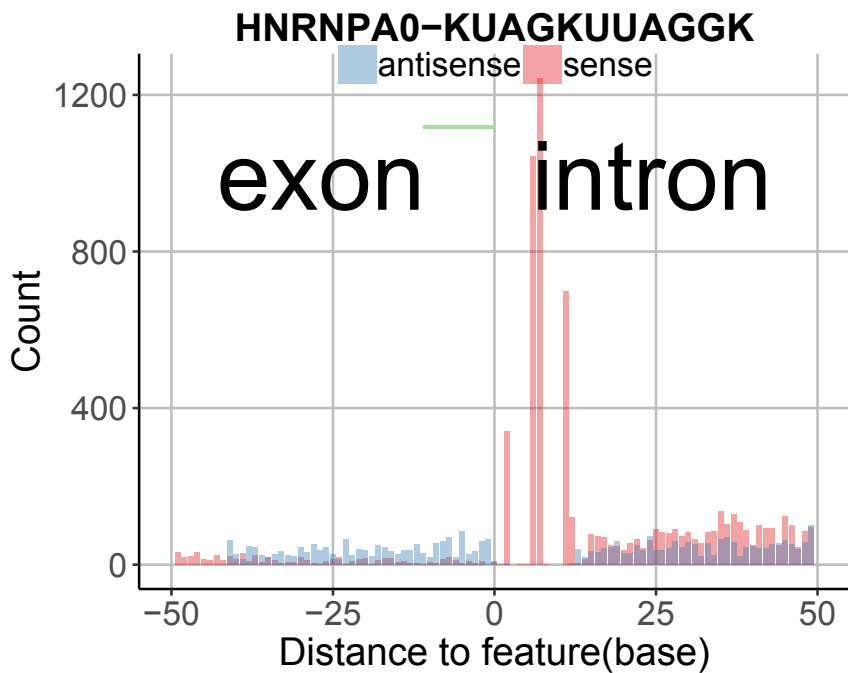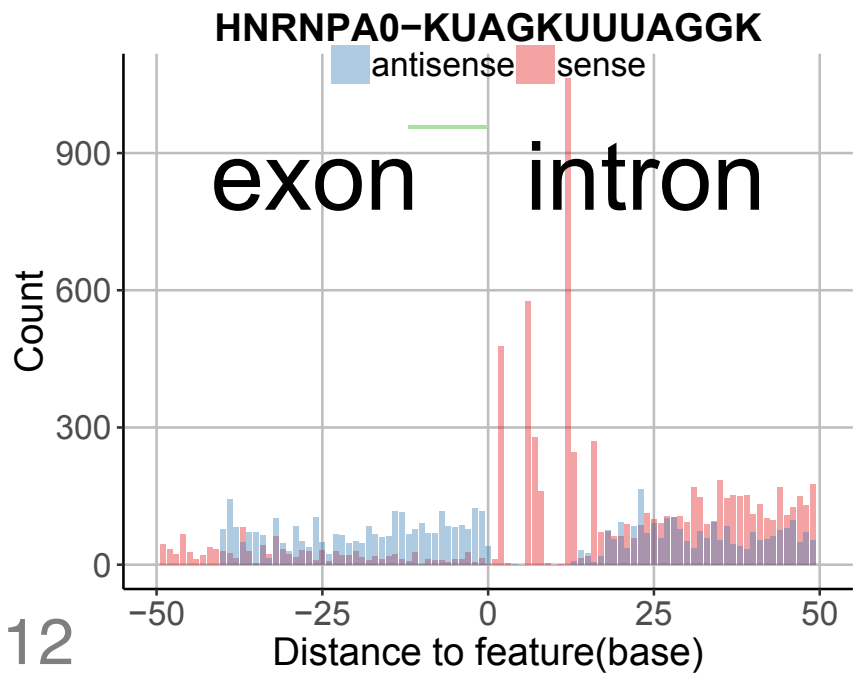

12

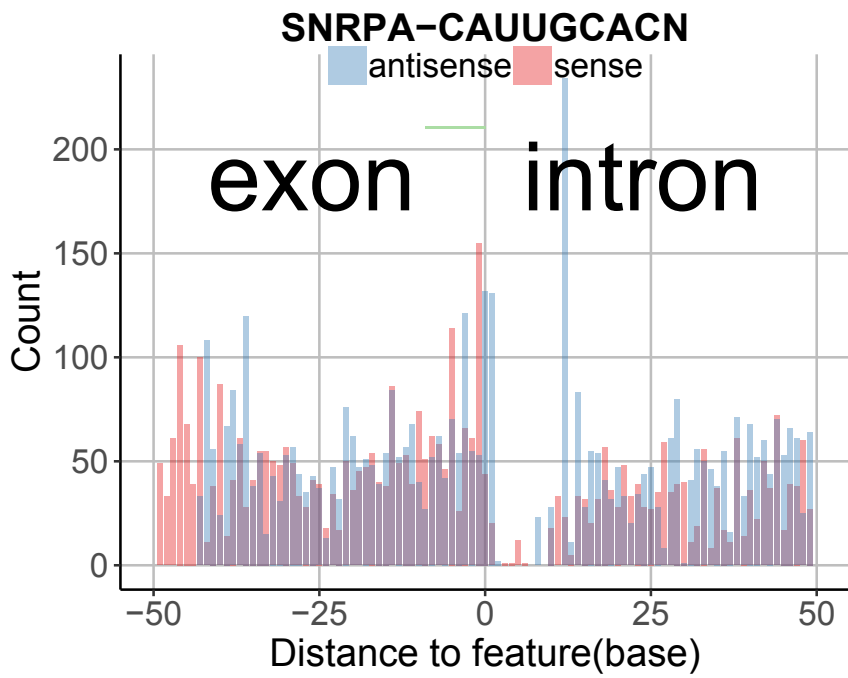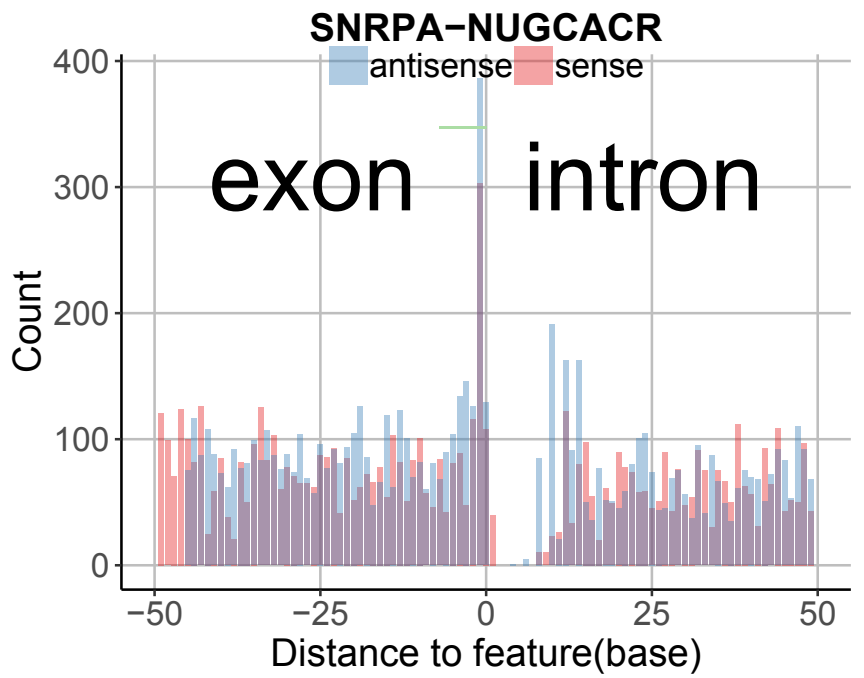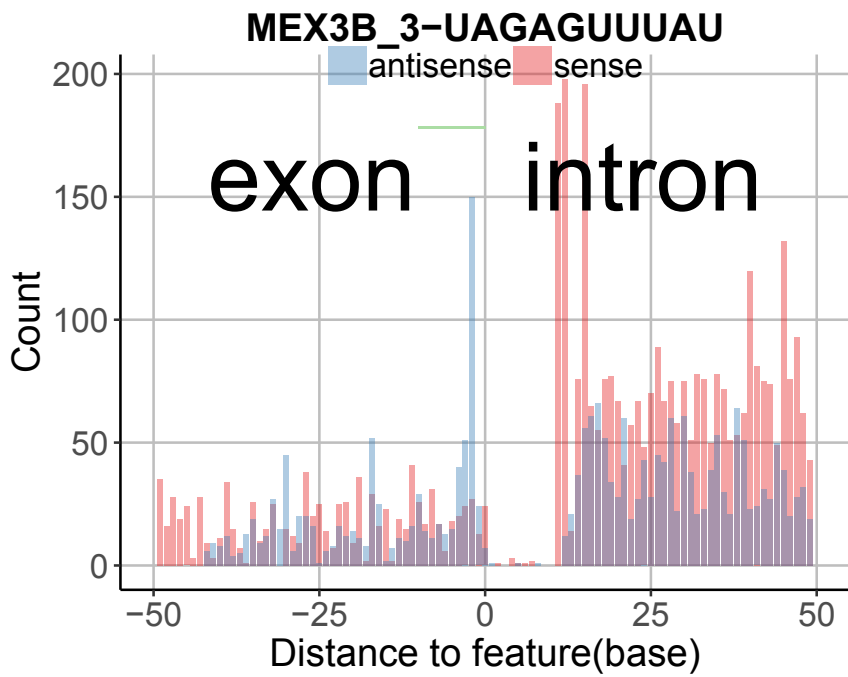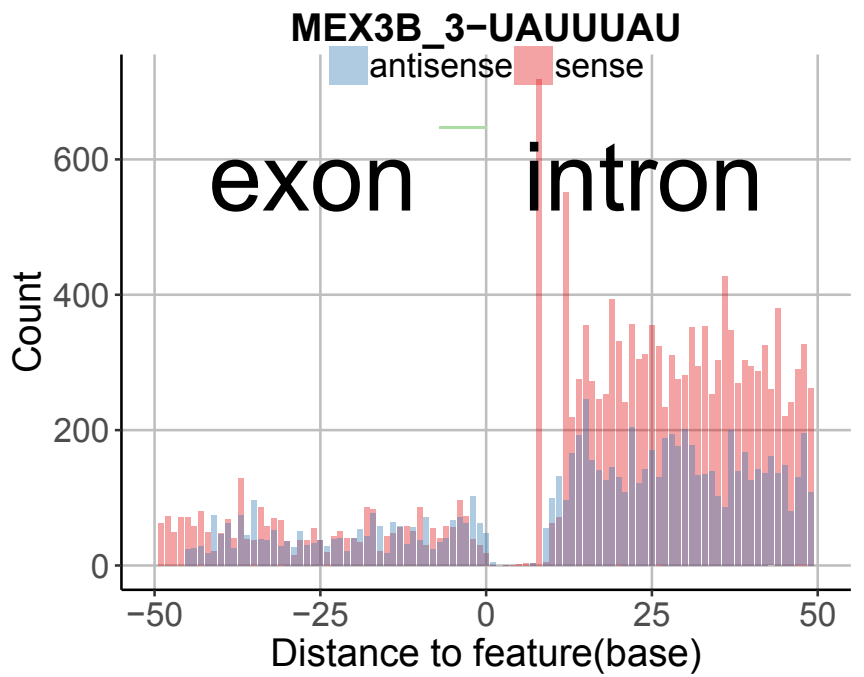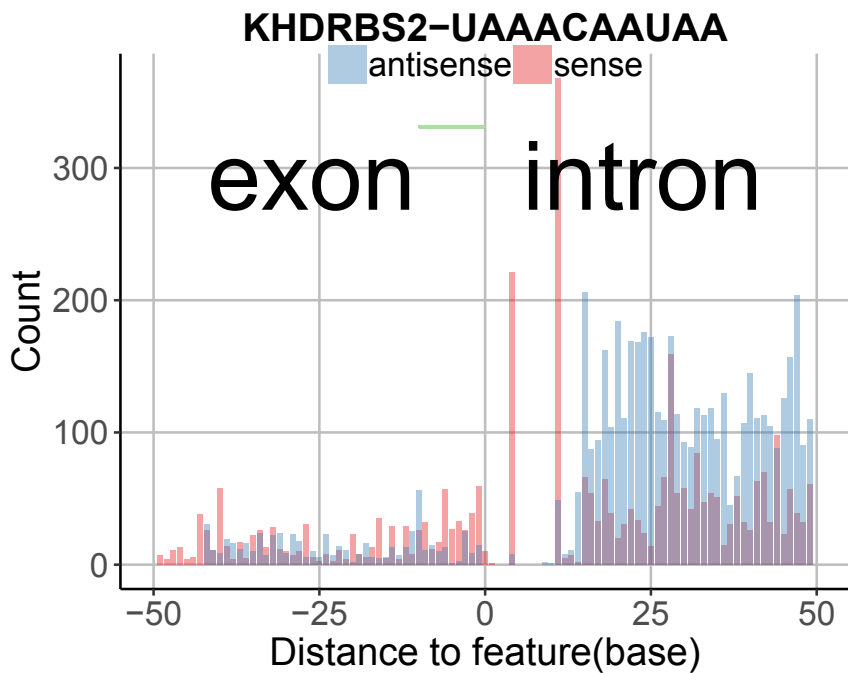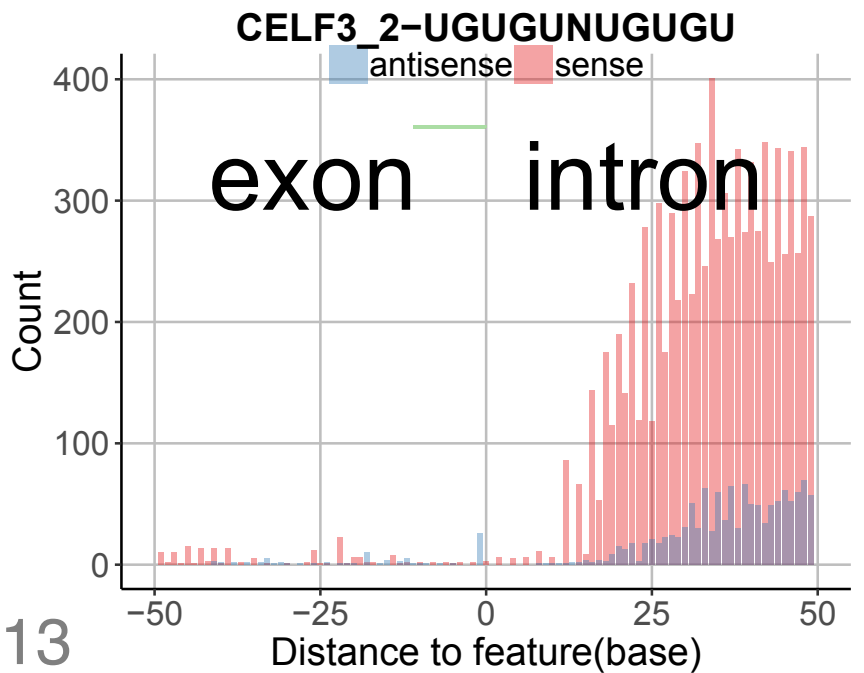

13

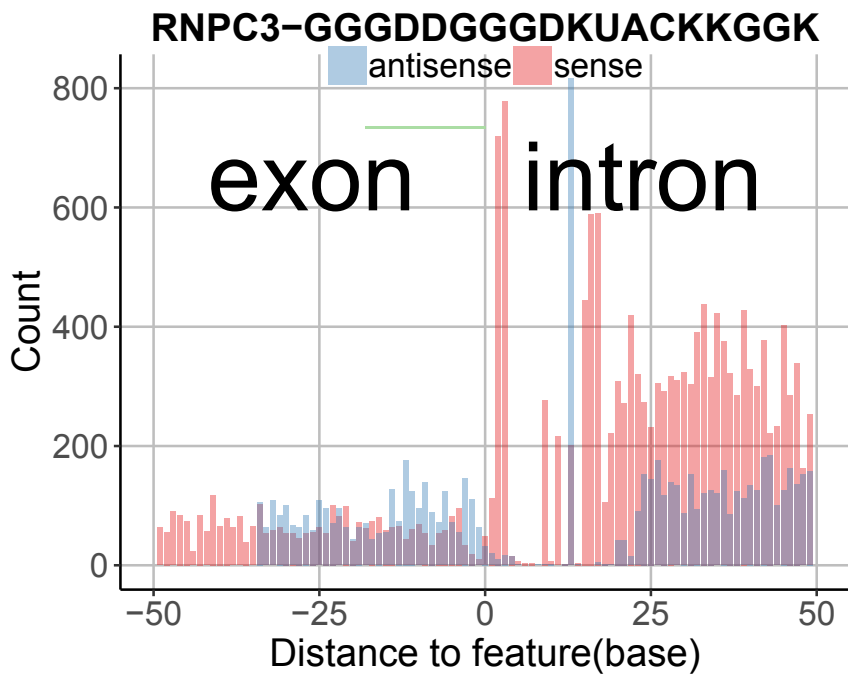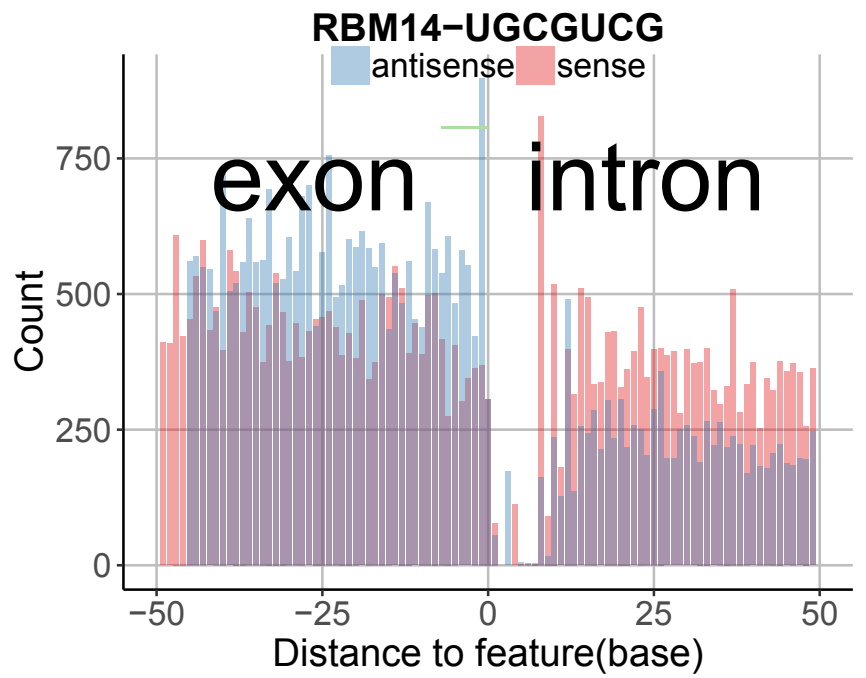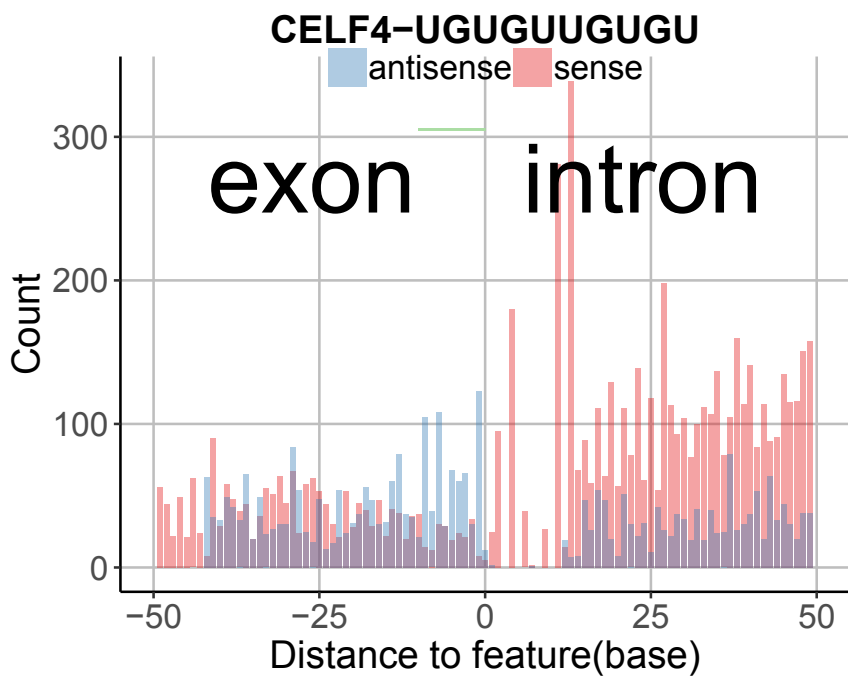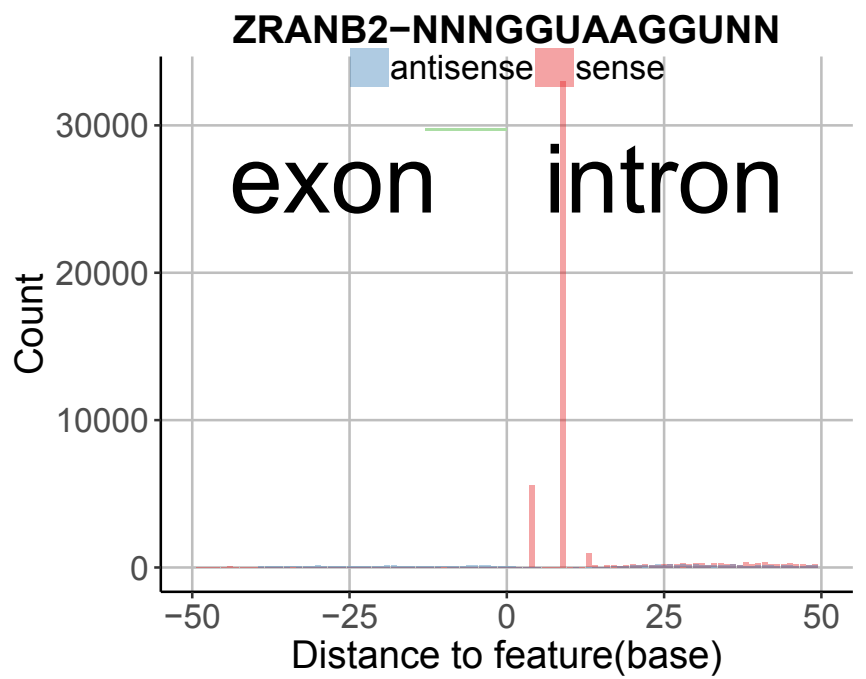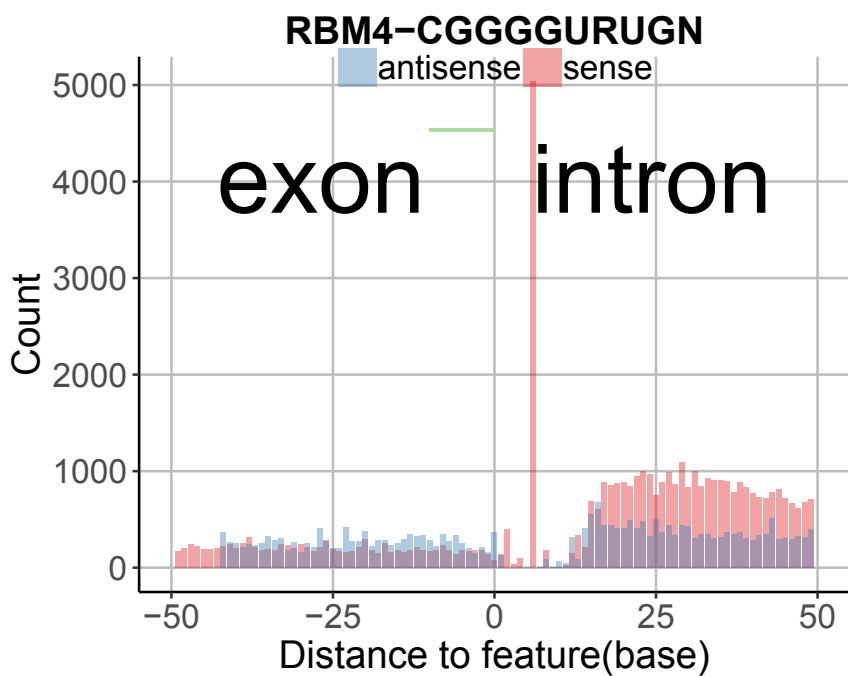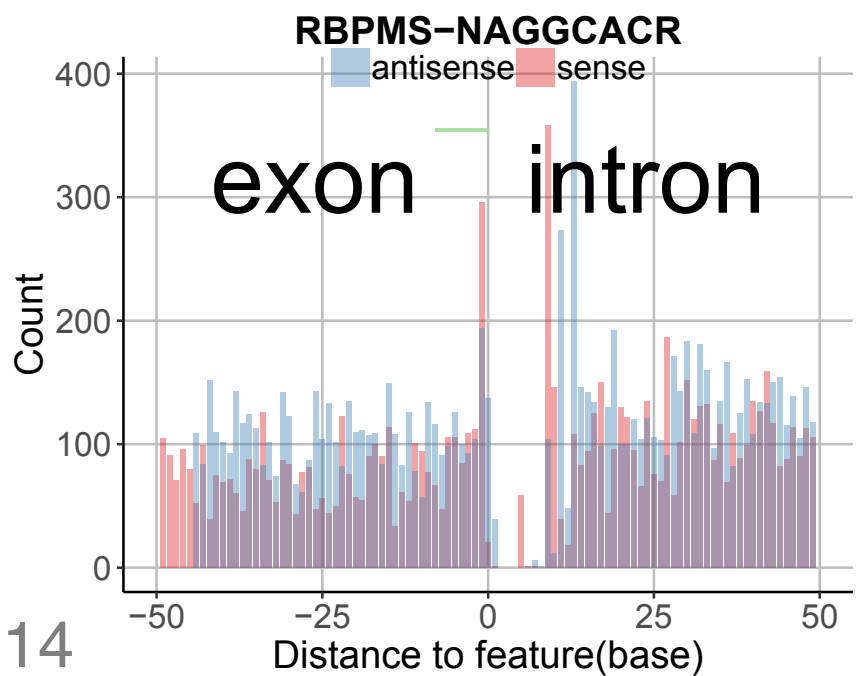

14

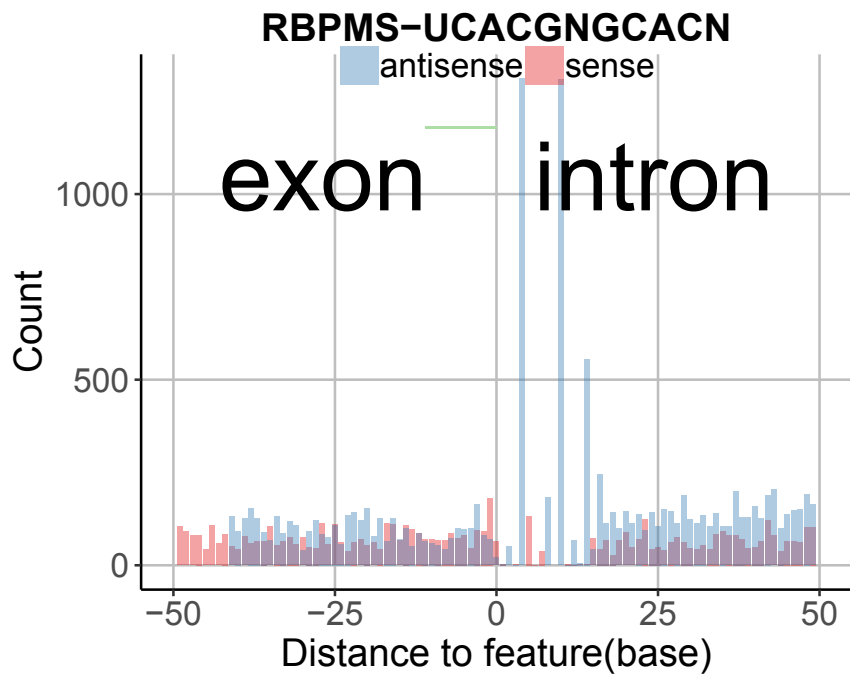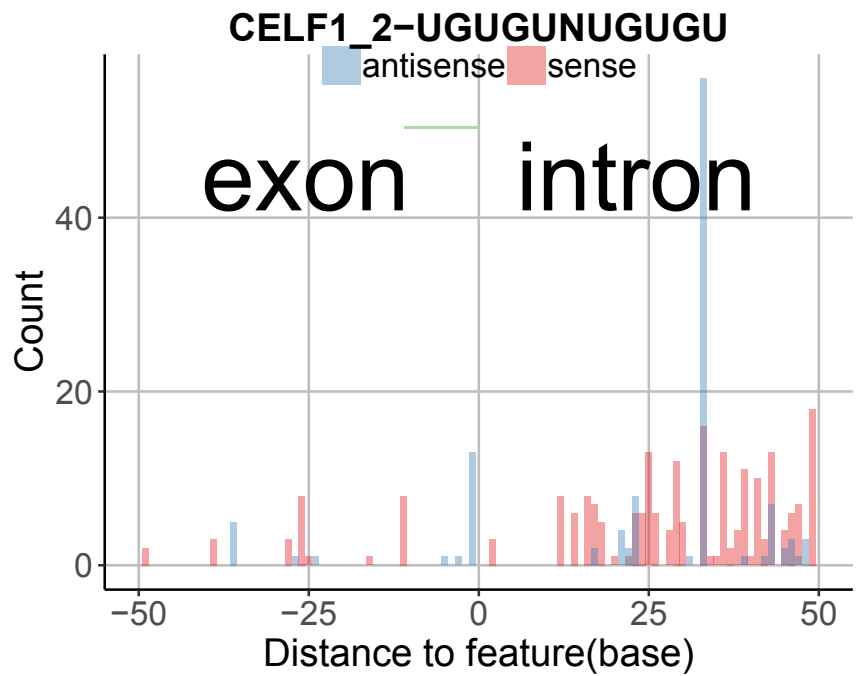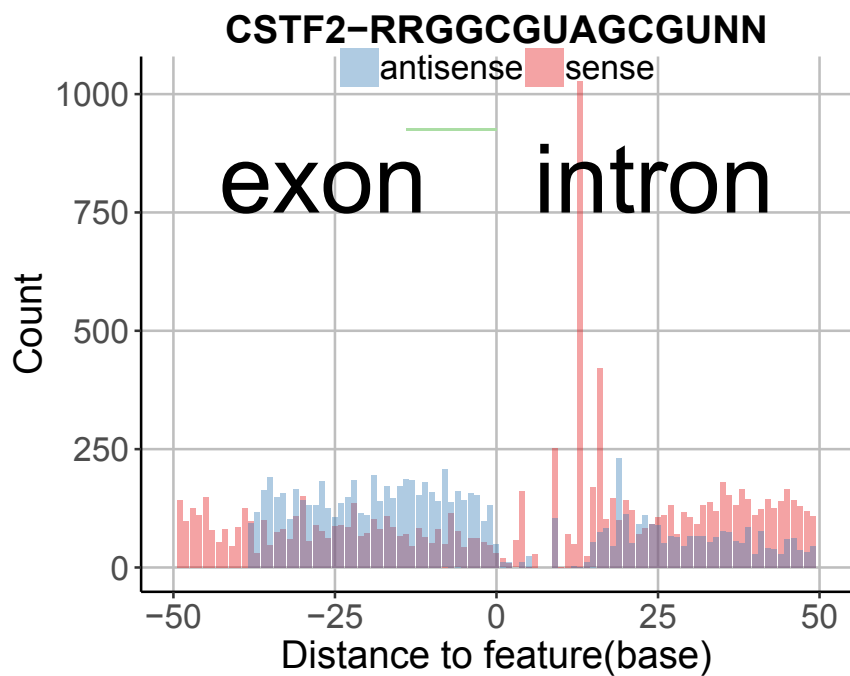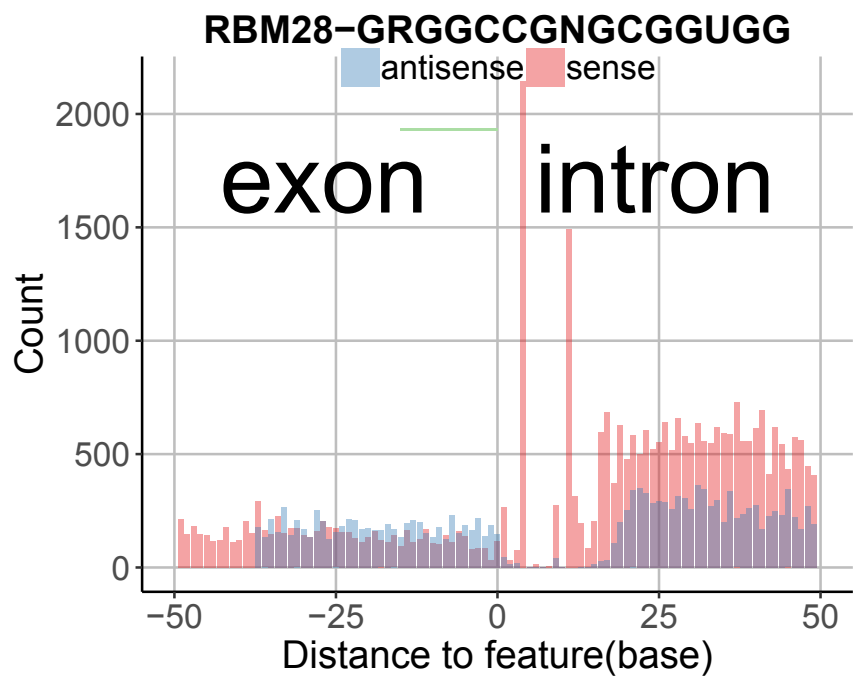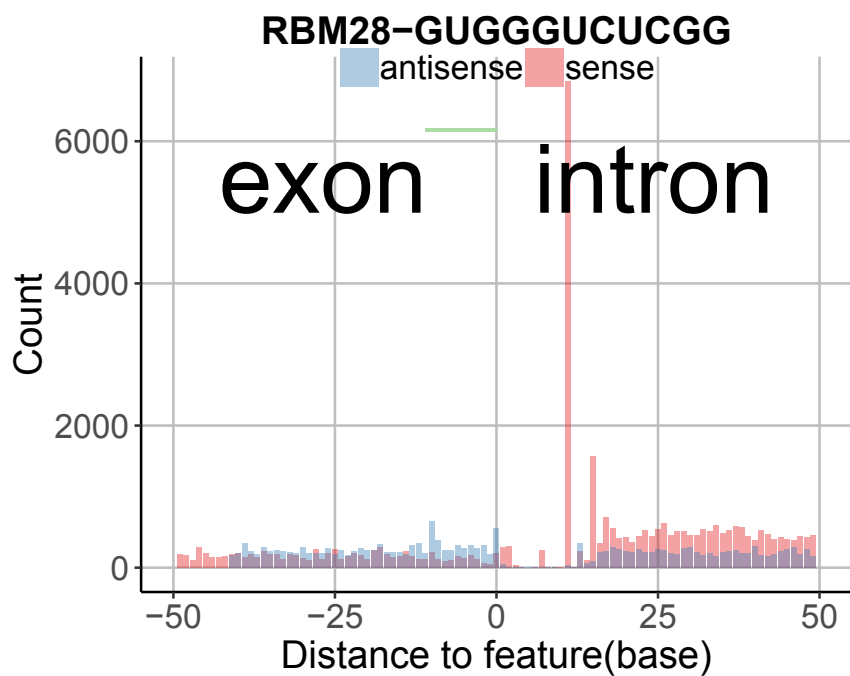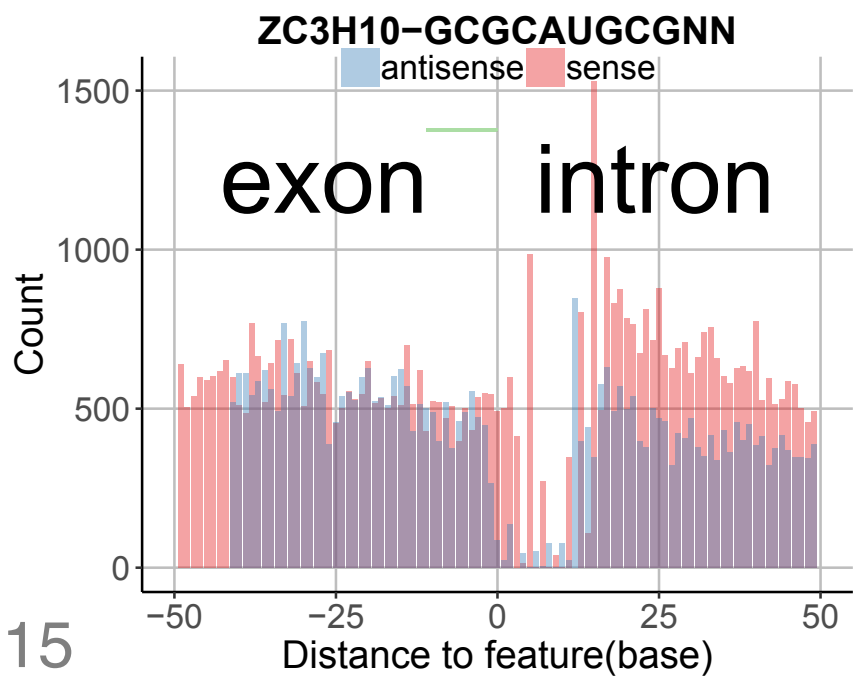



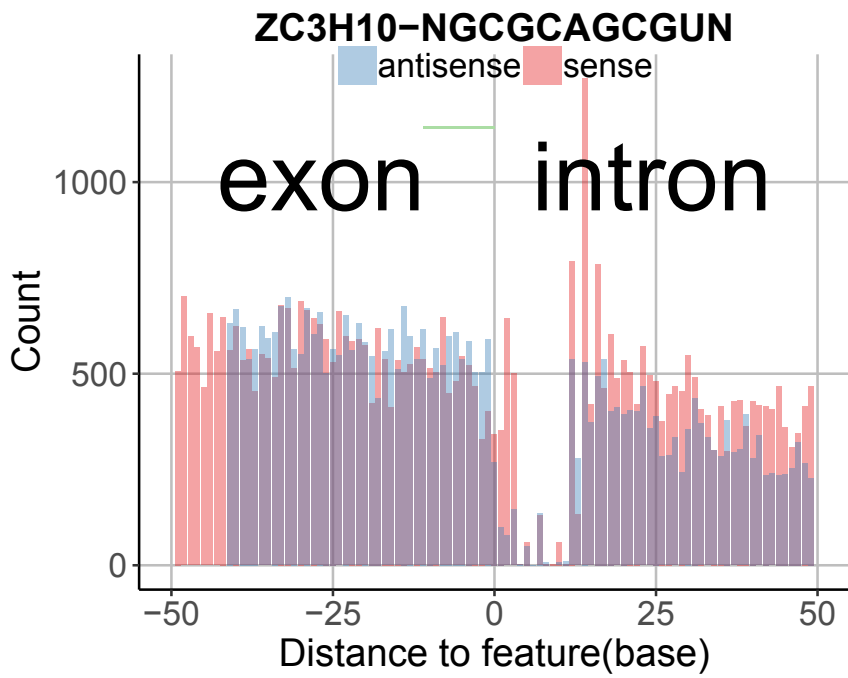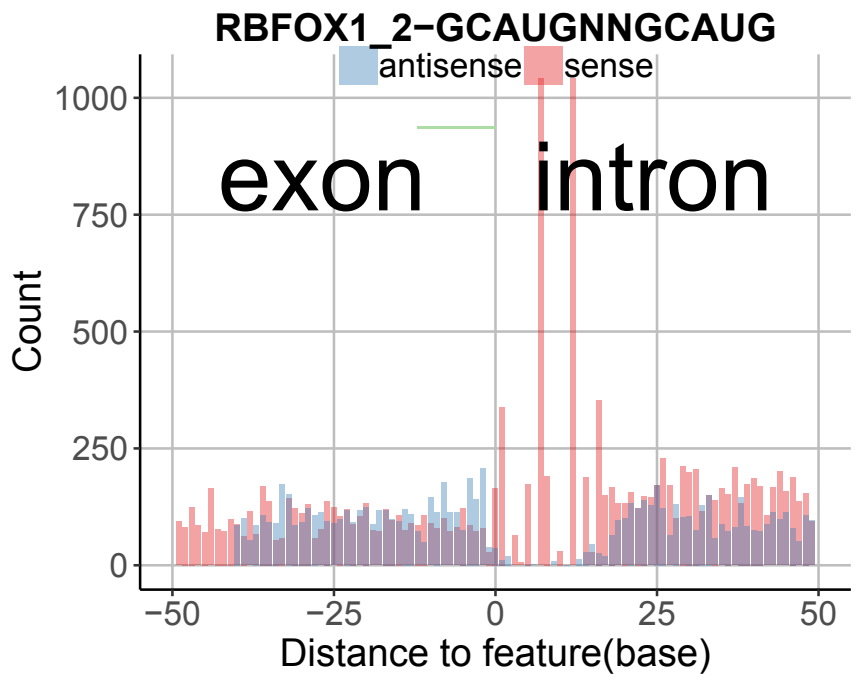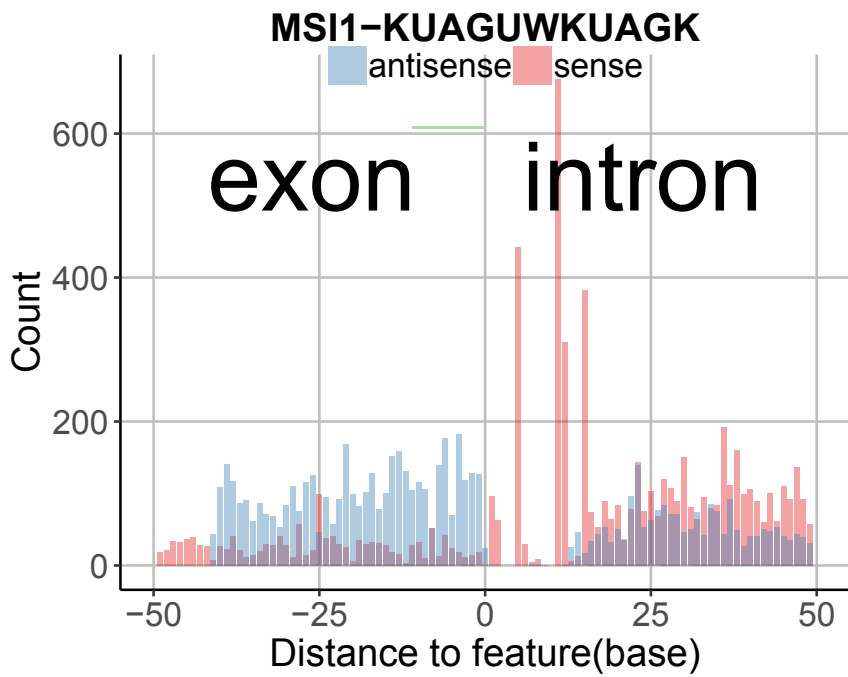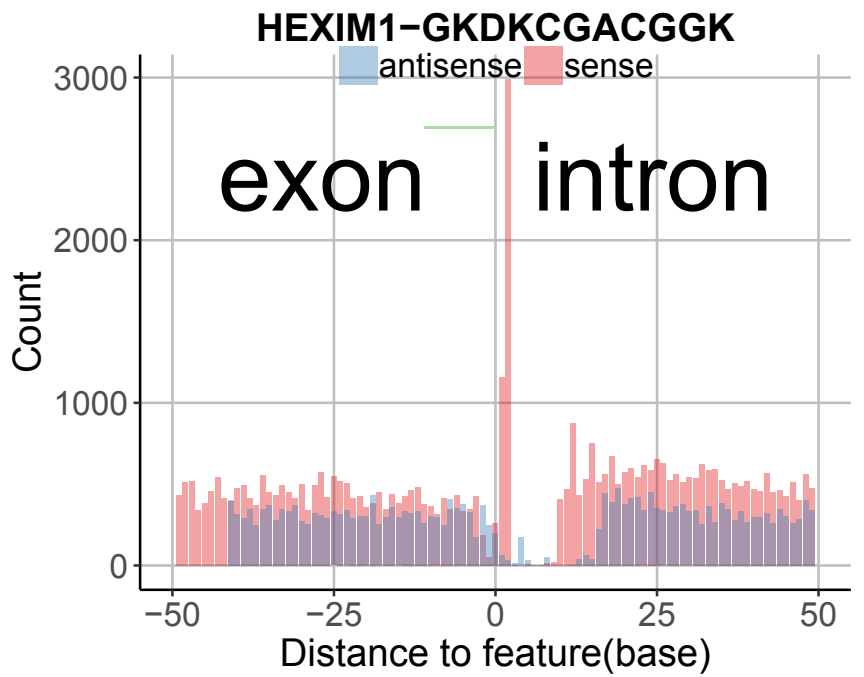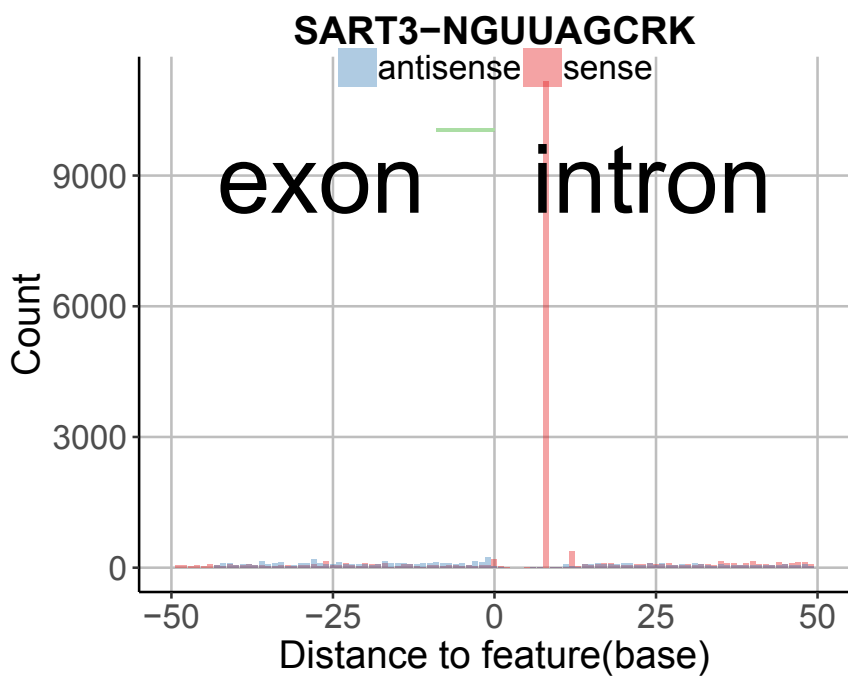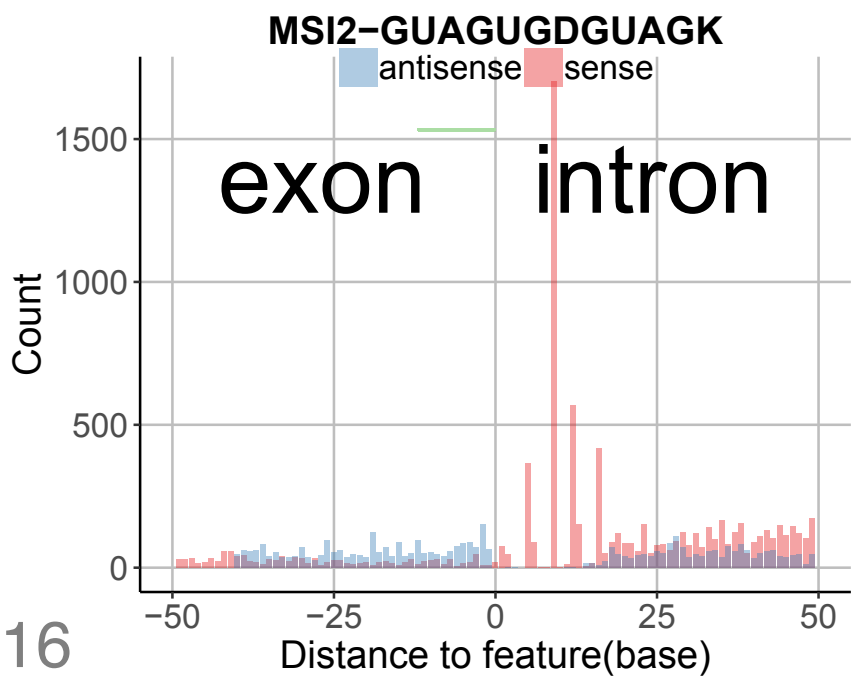

16

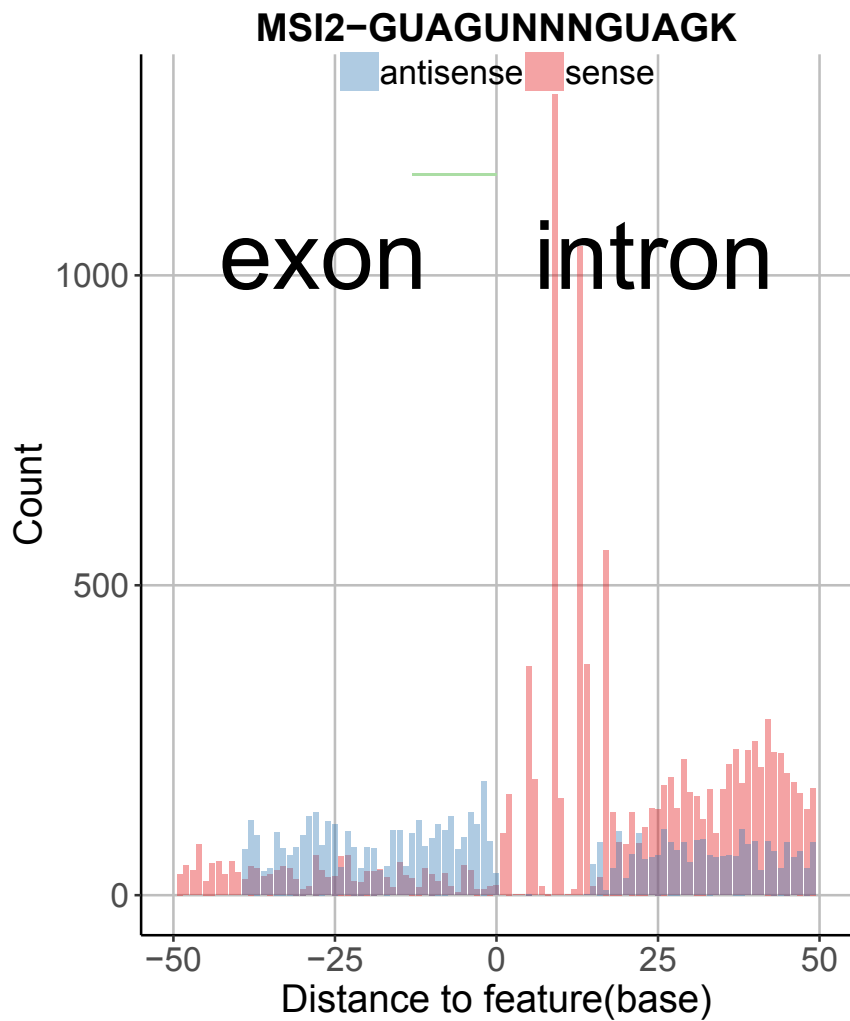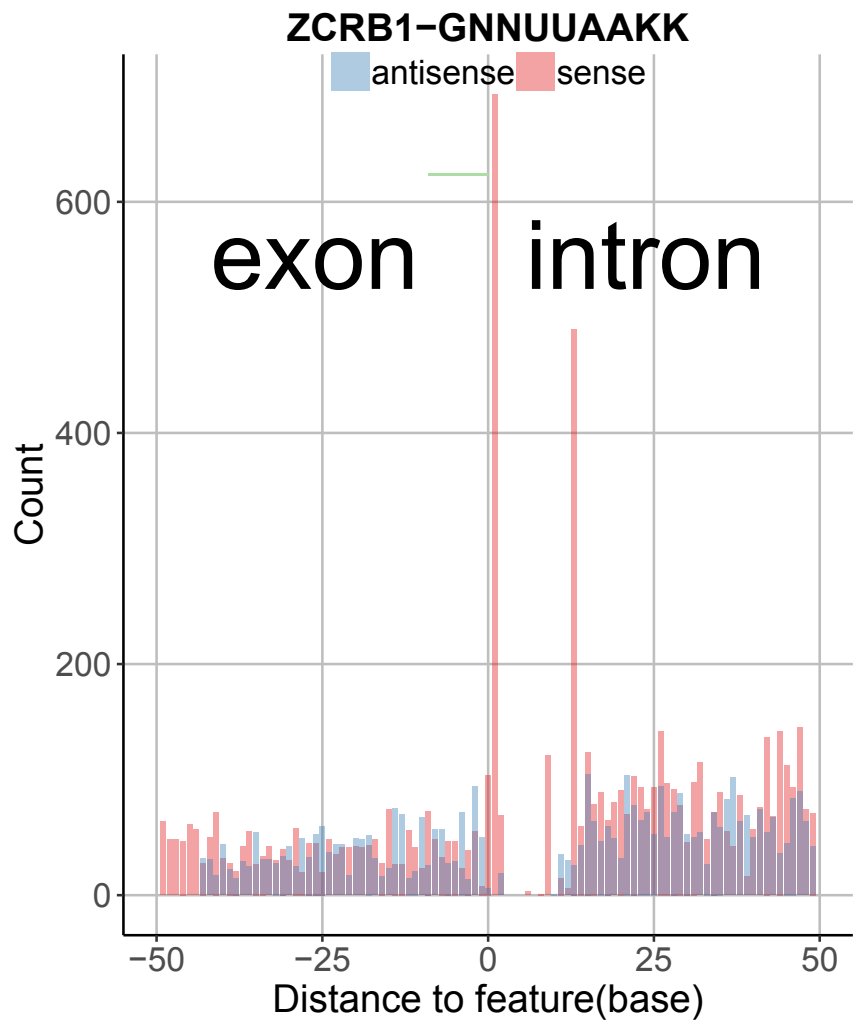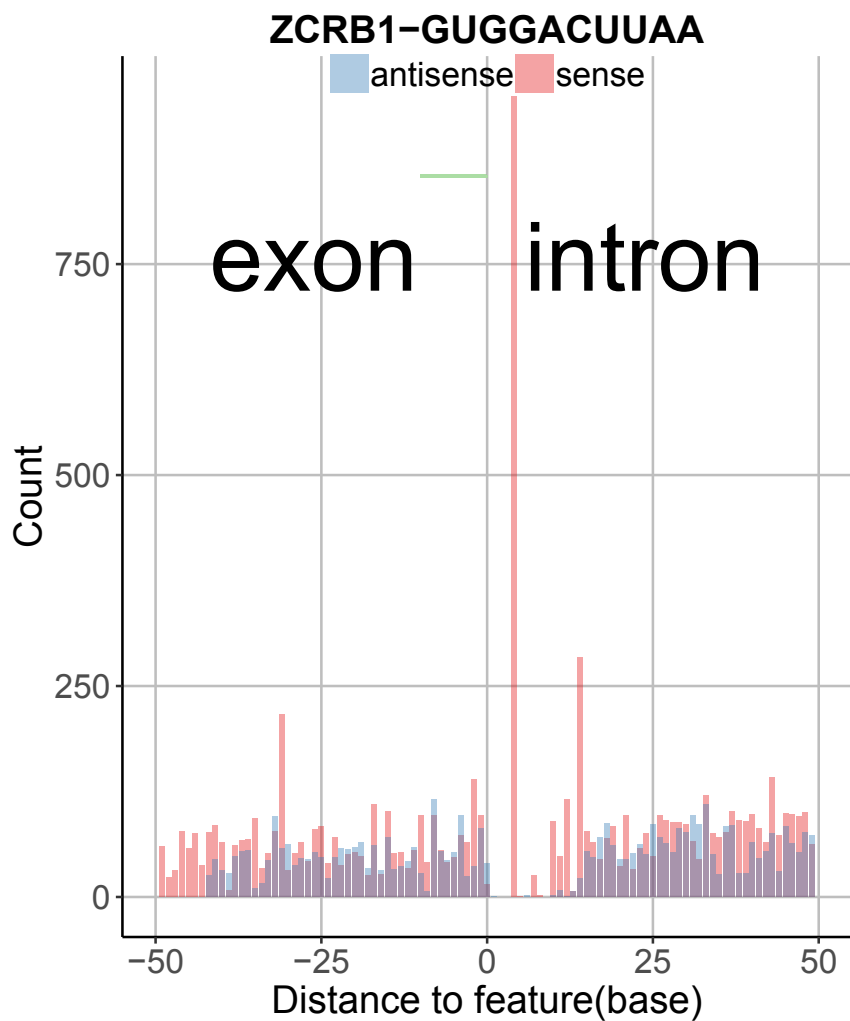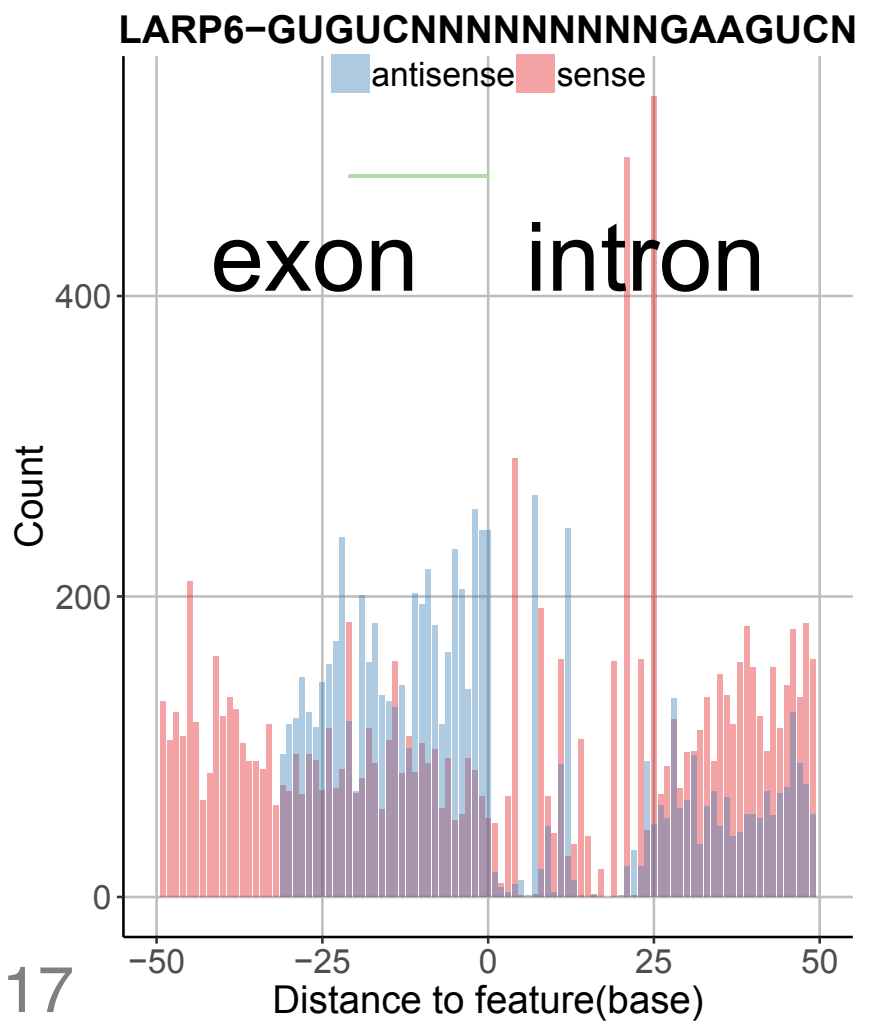

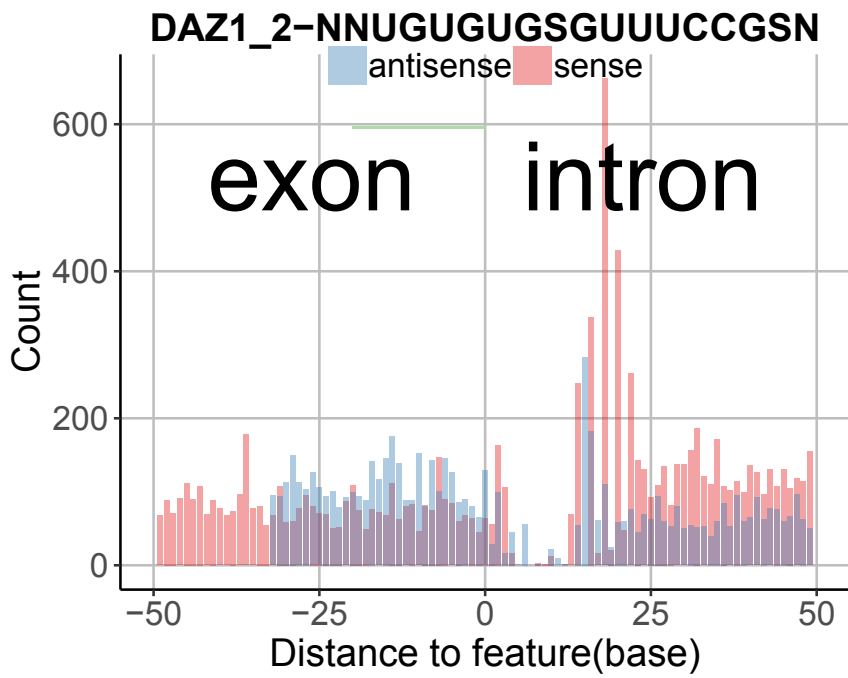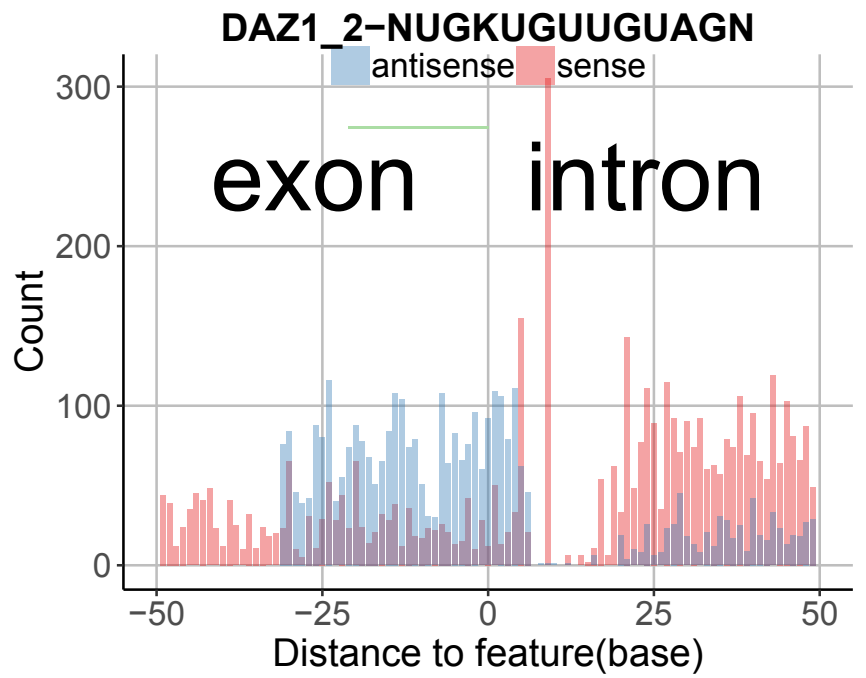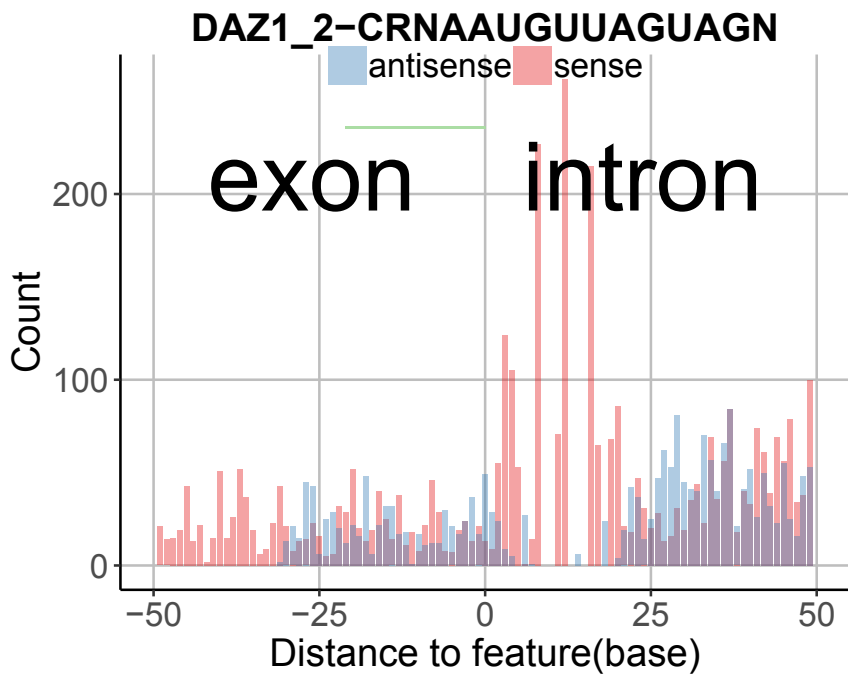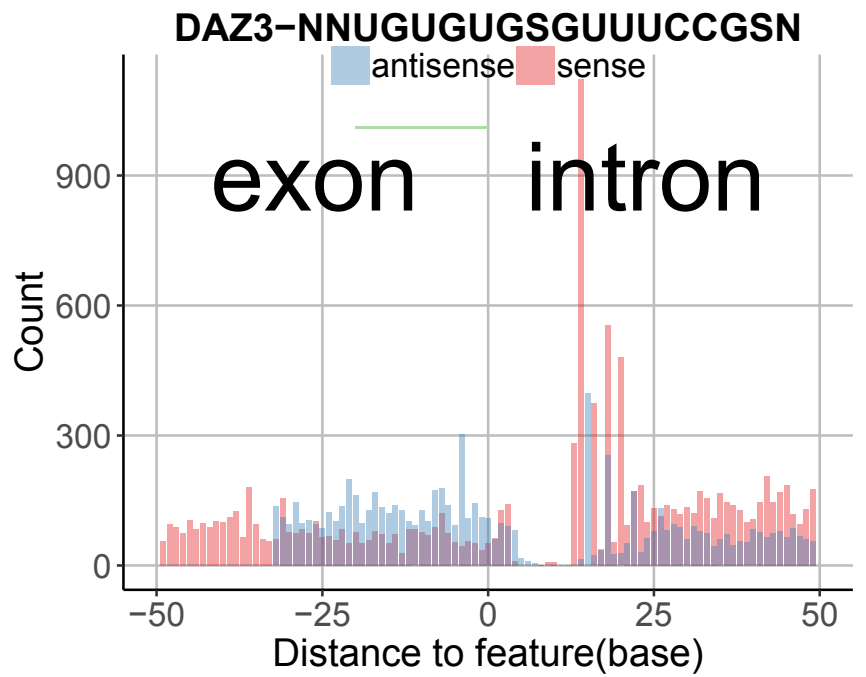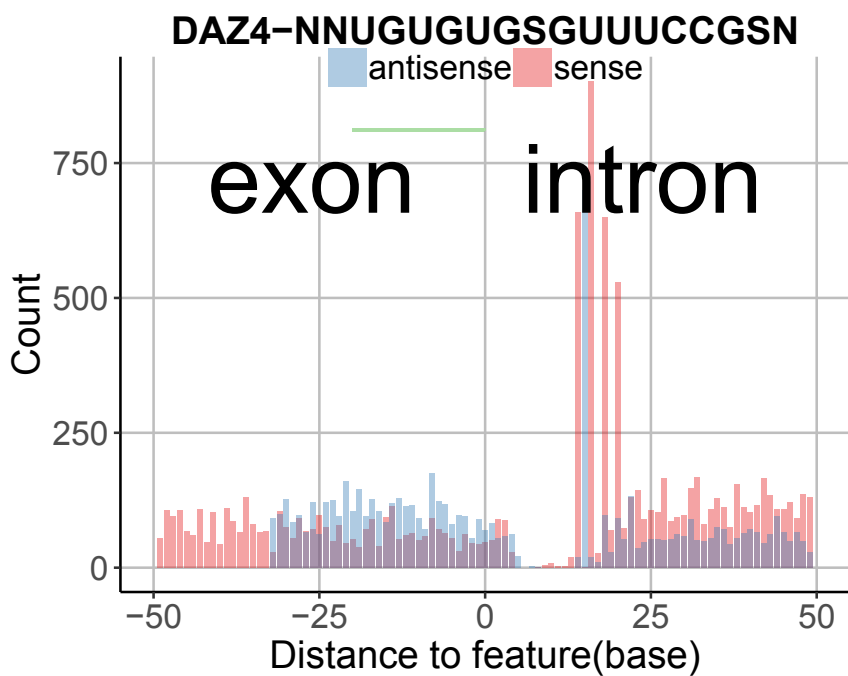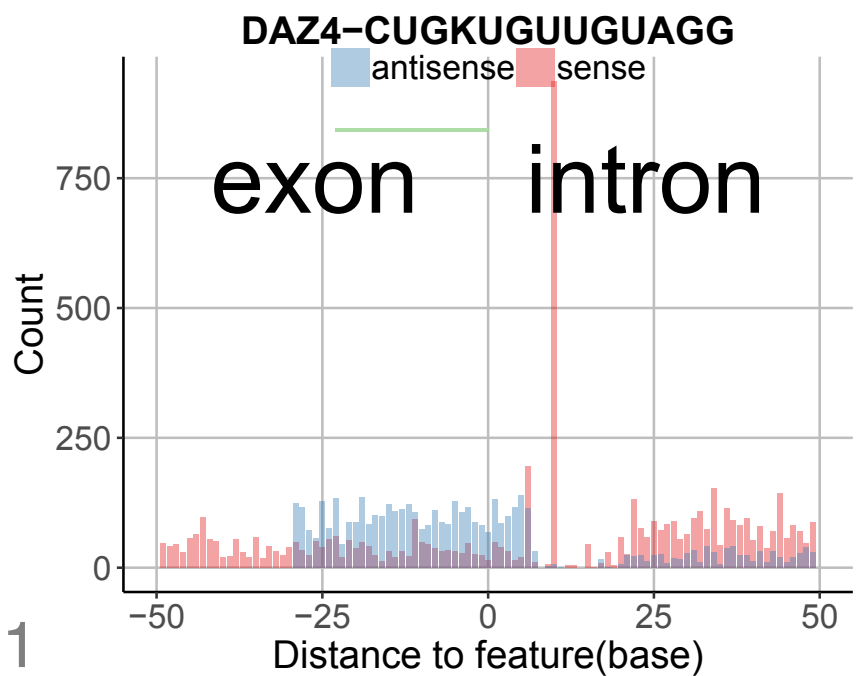

1

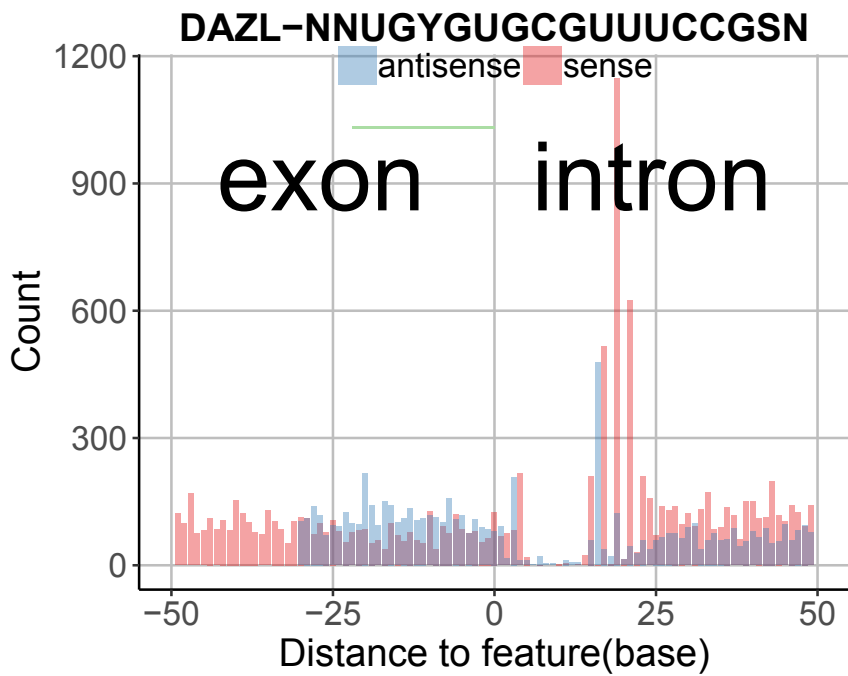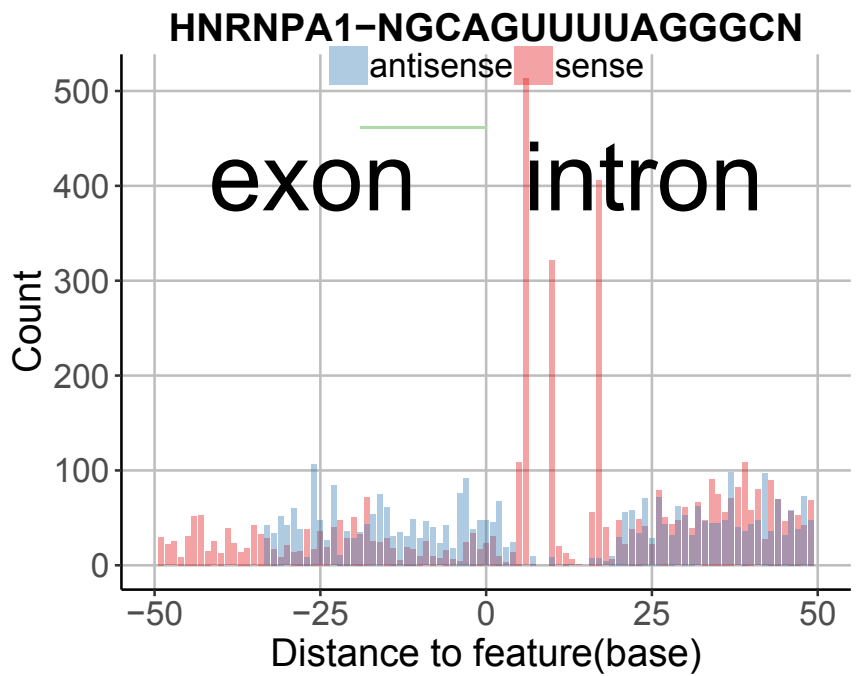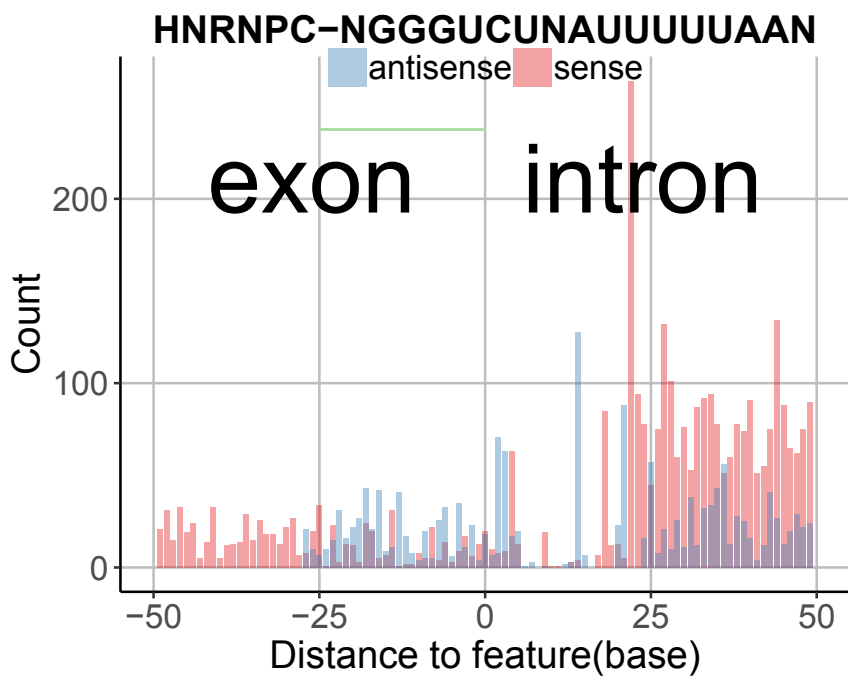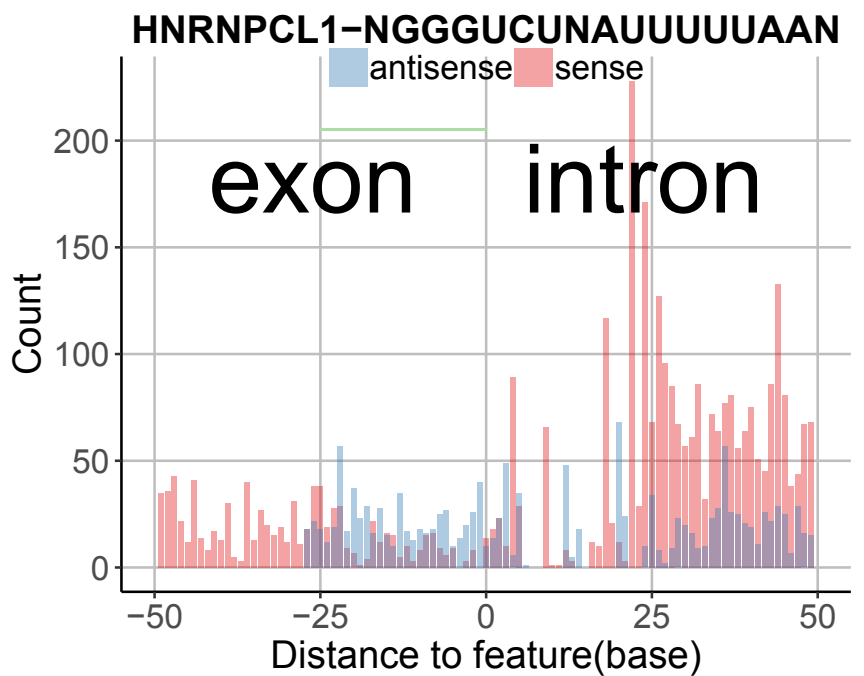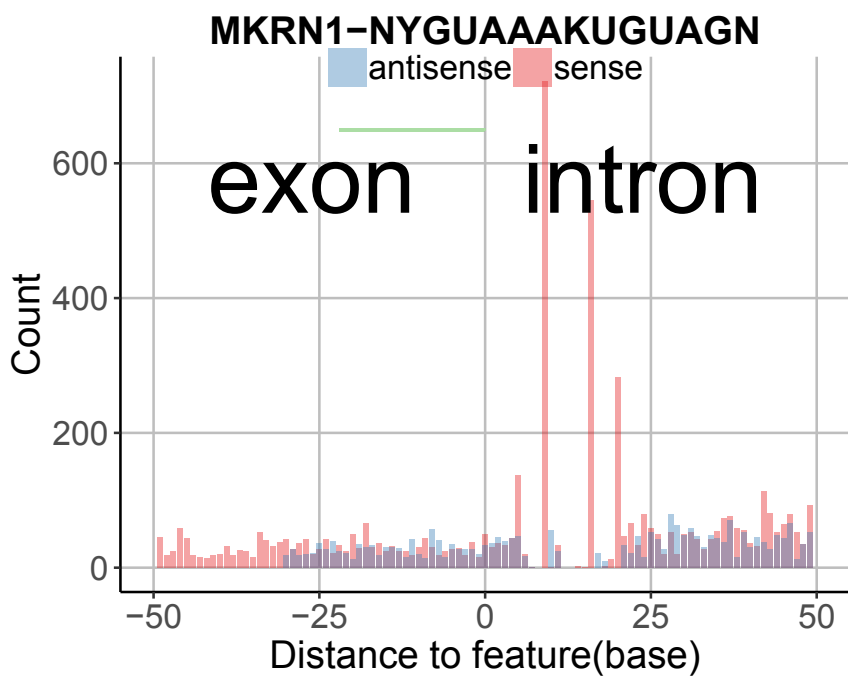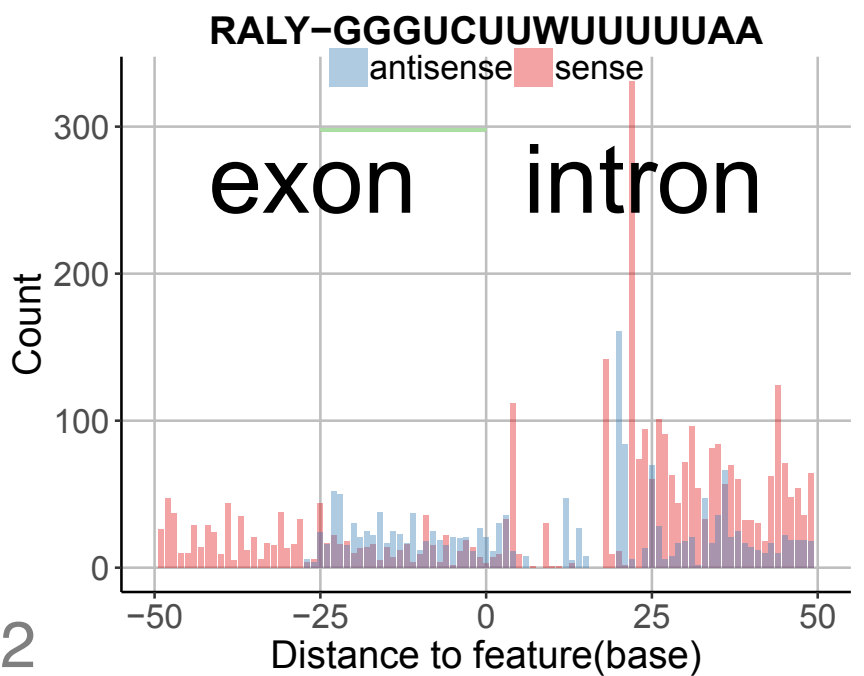

2

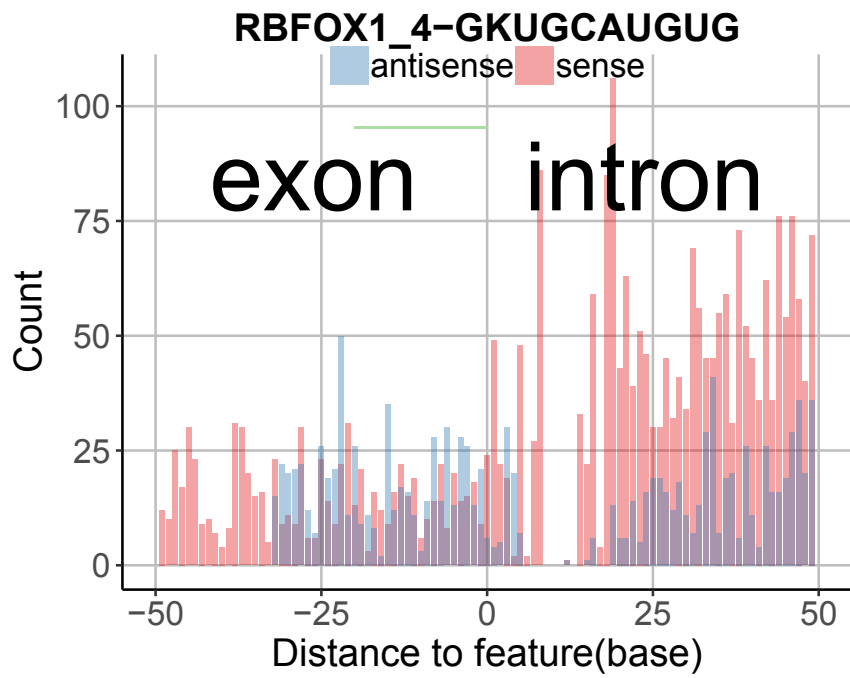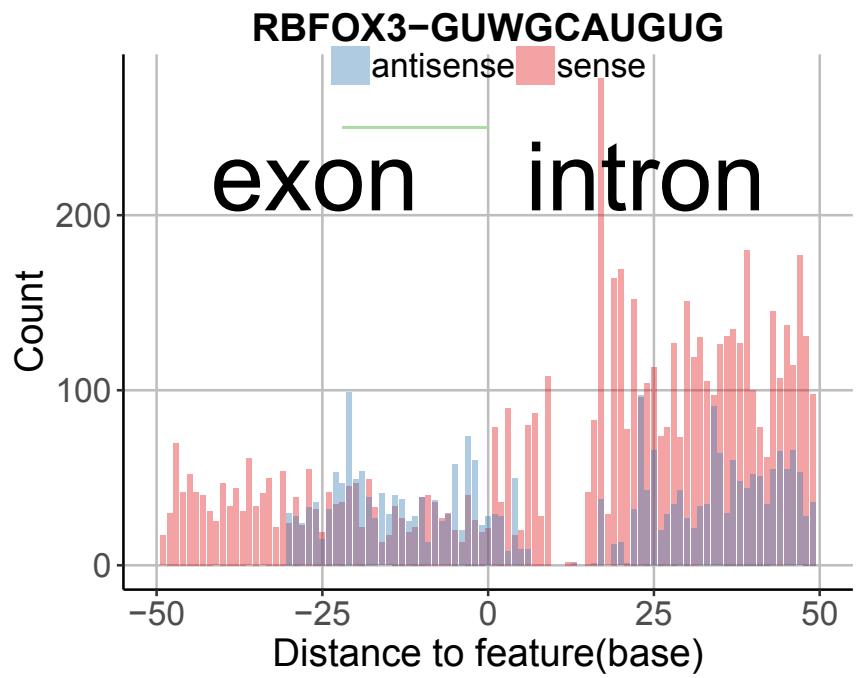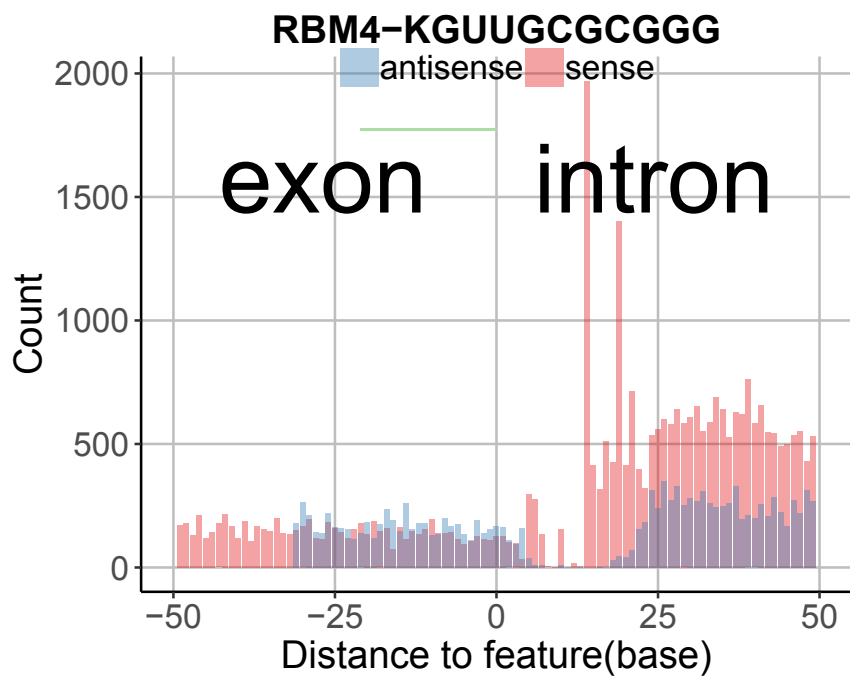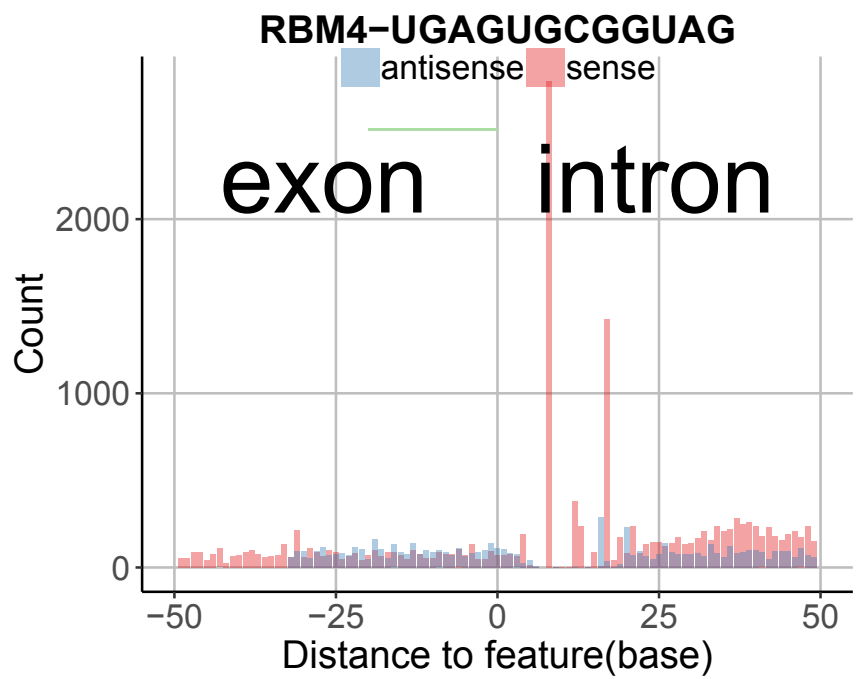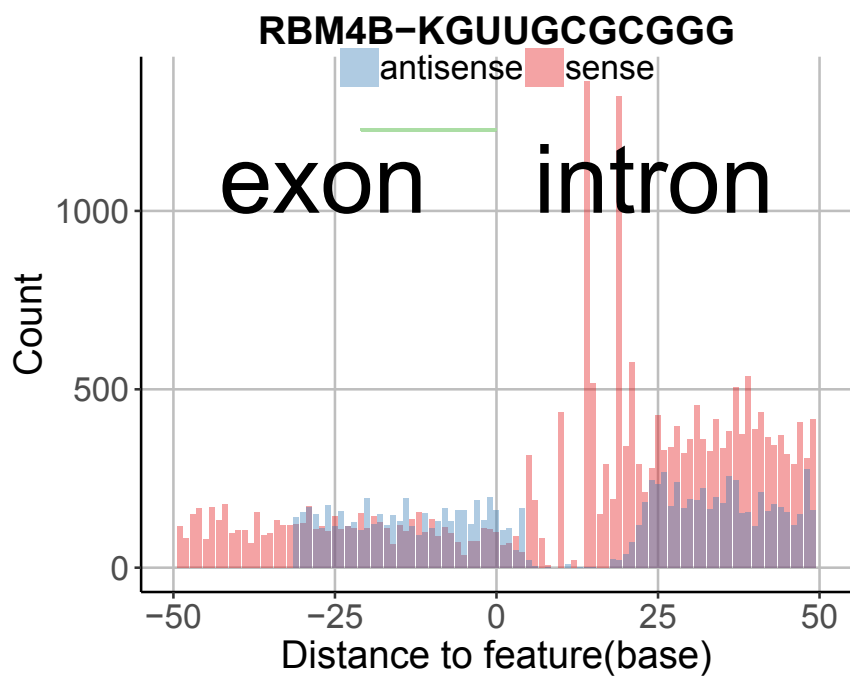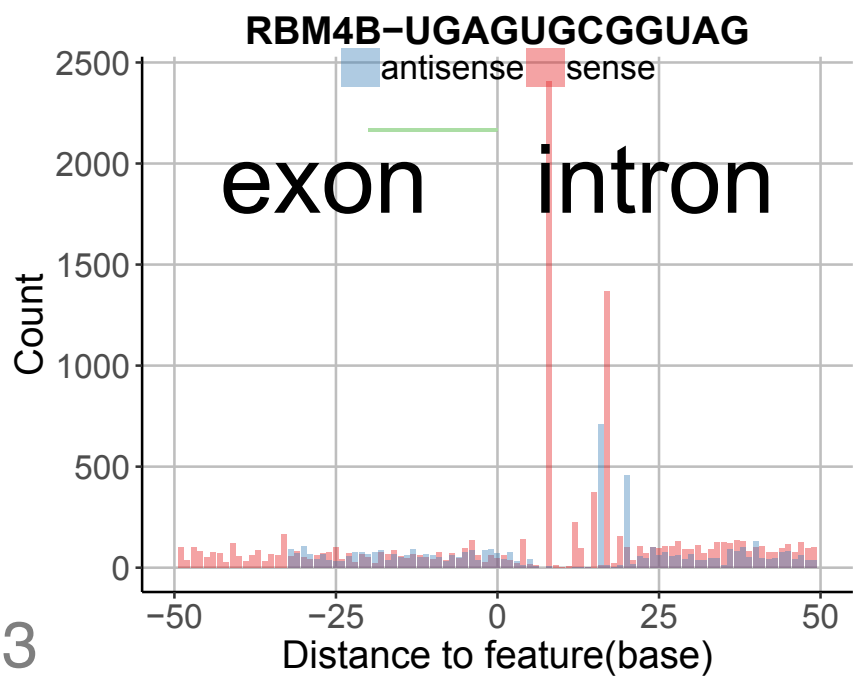

3

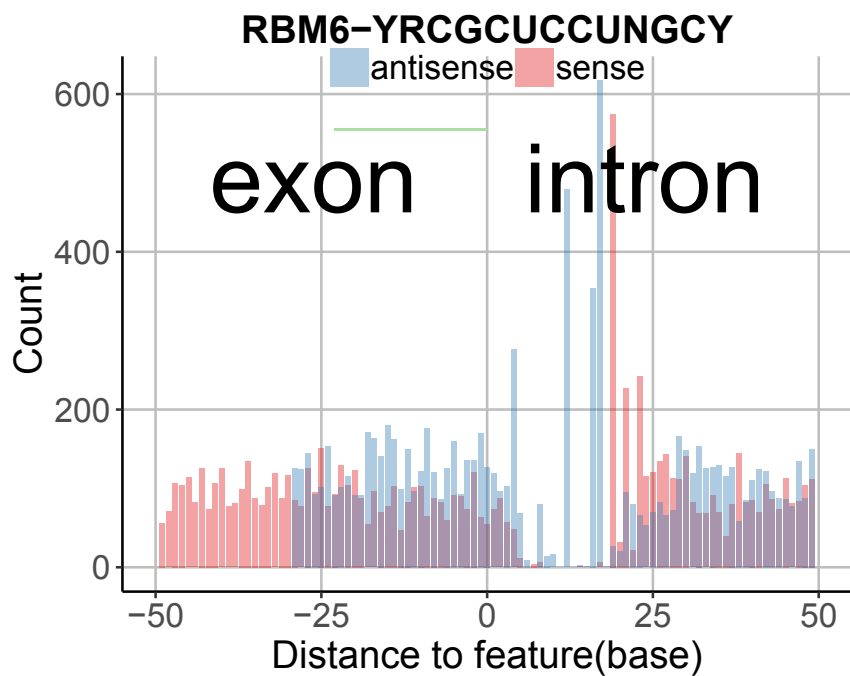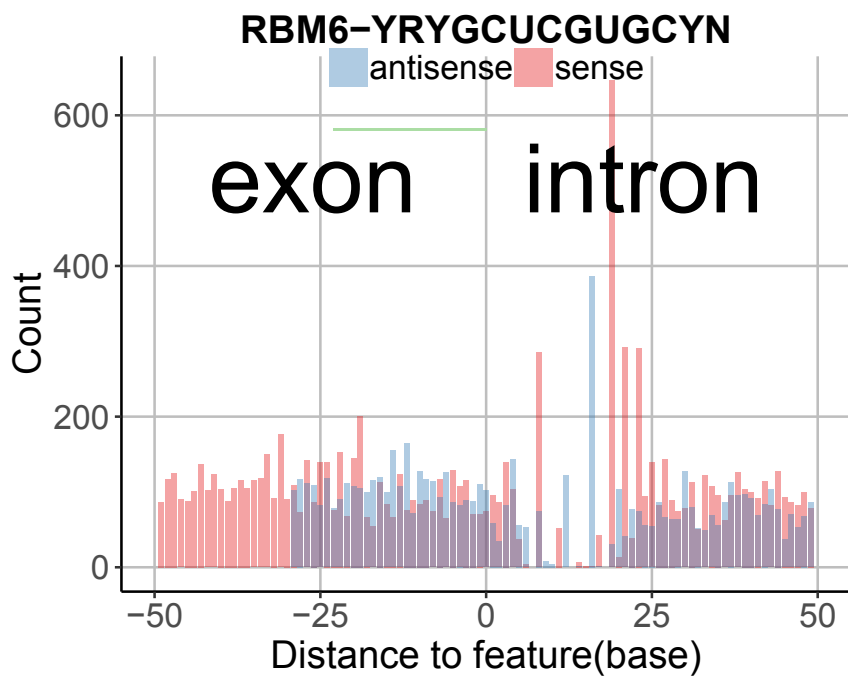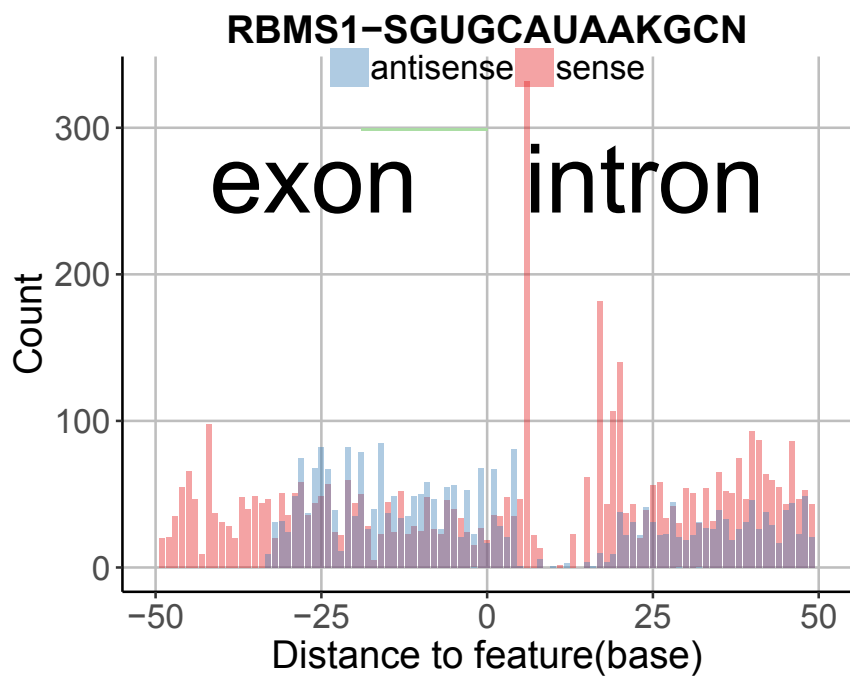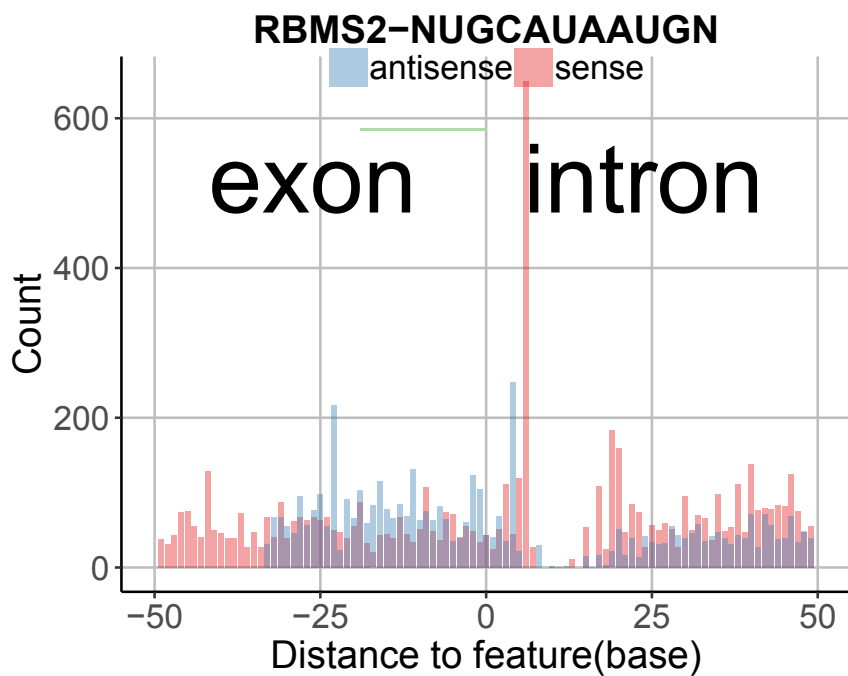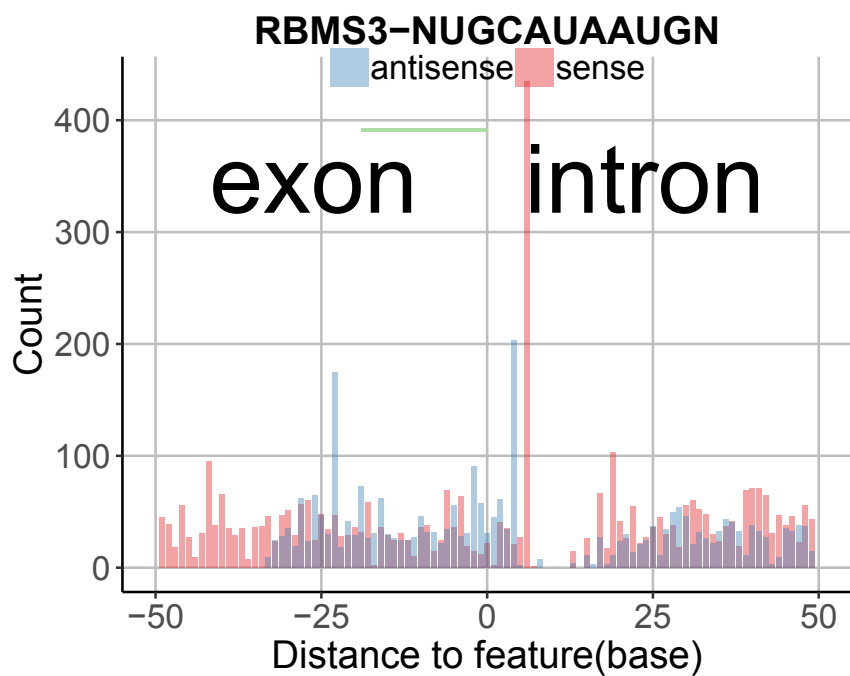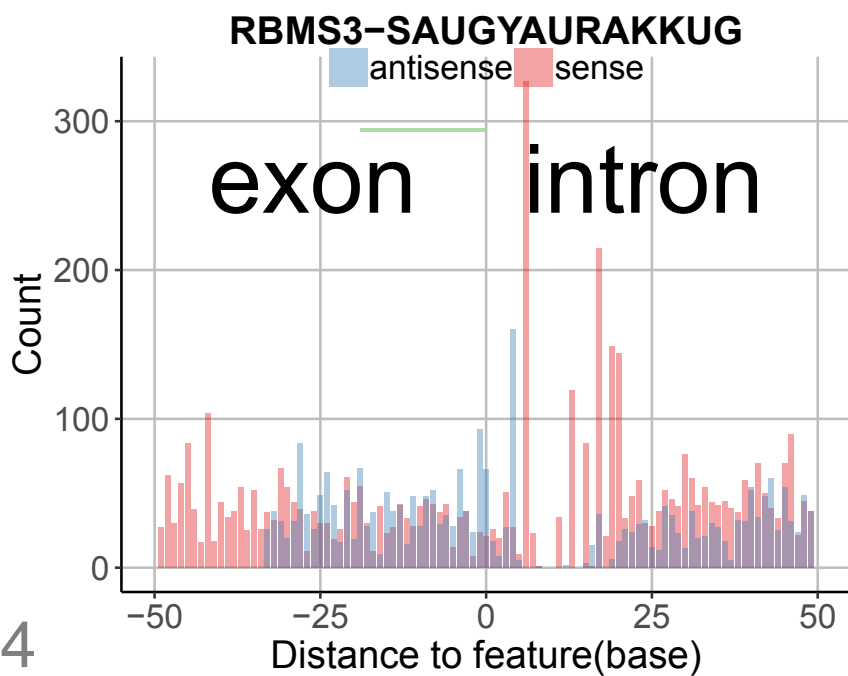

4

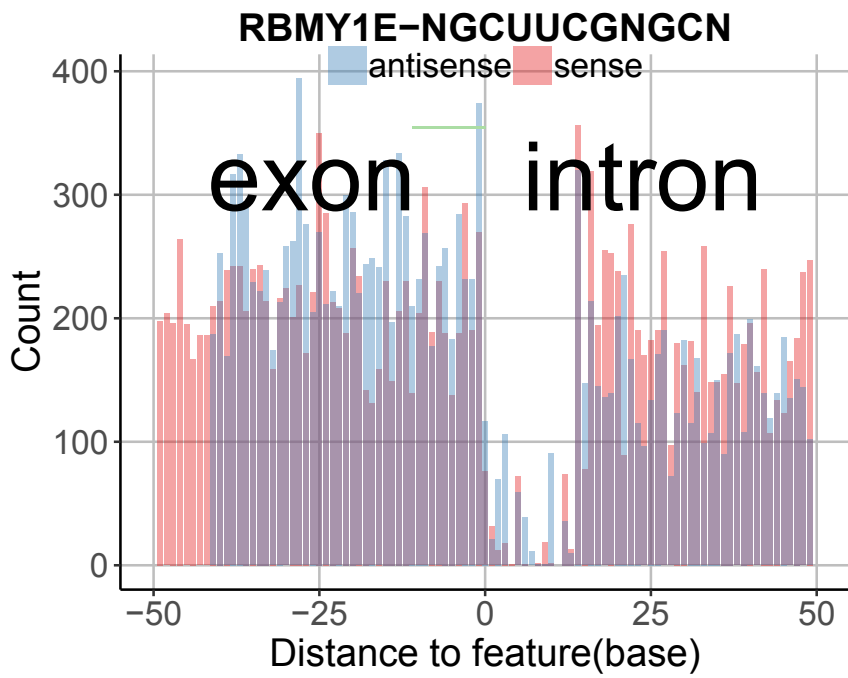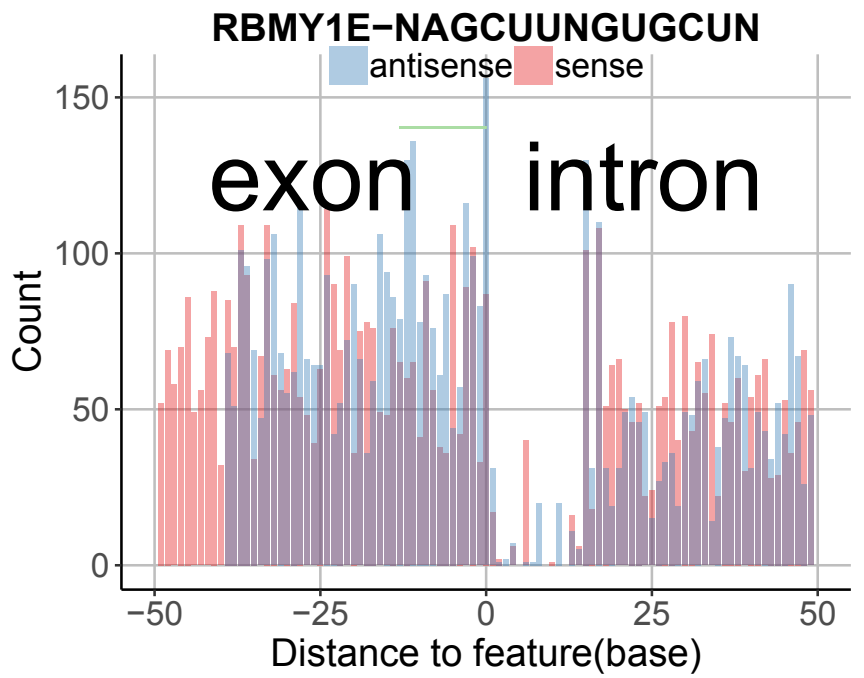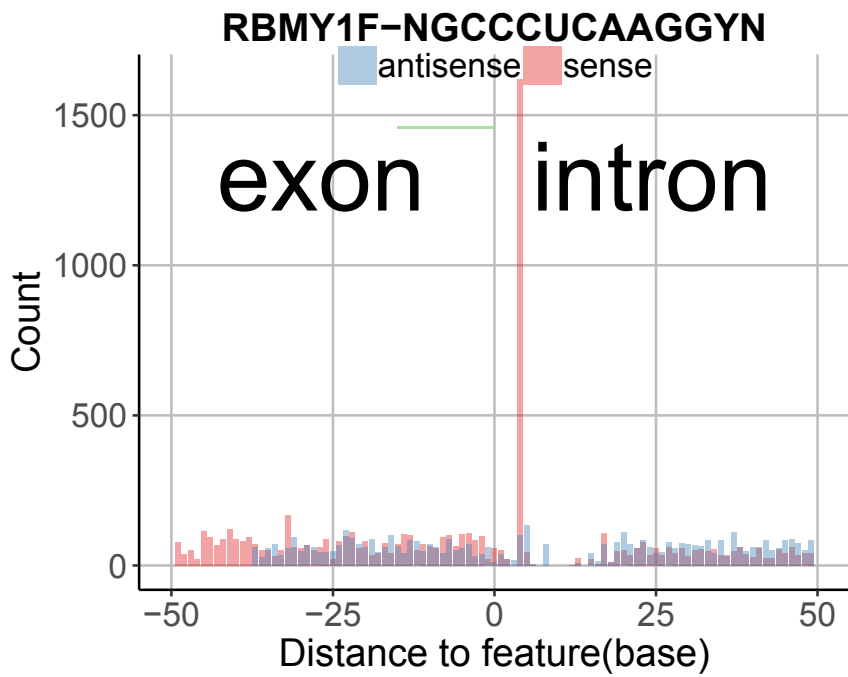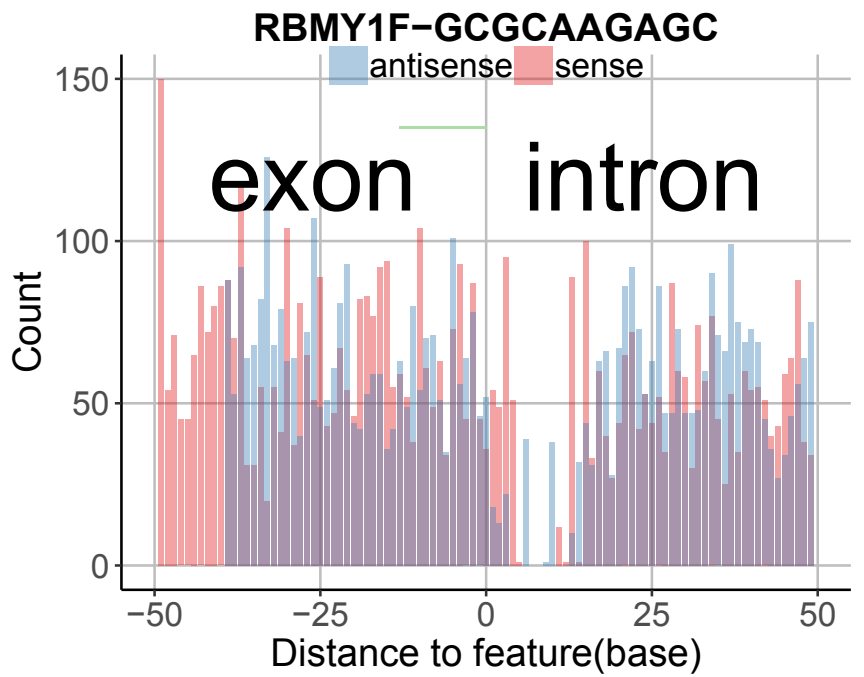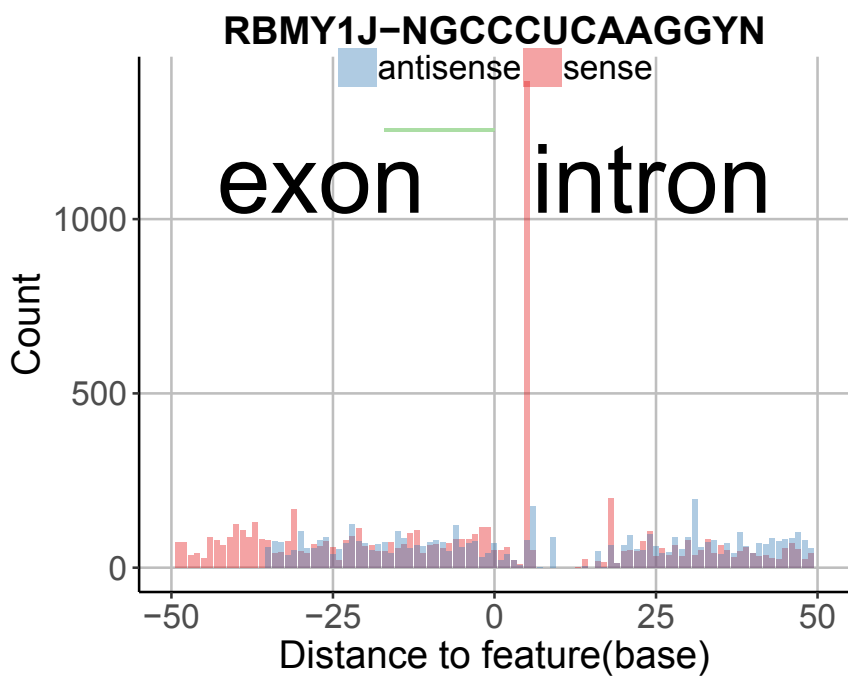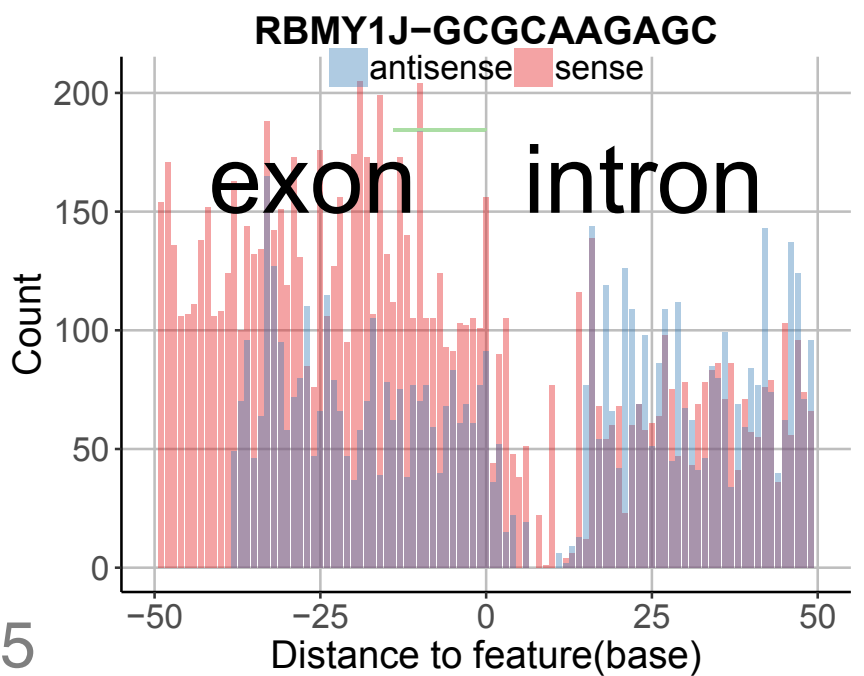

5

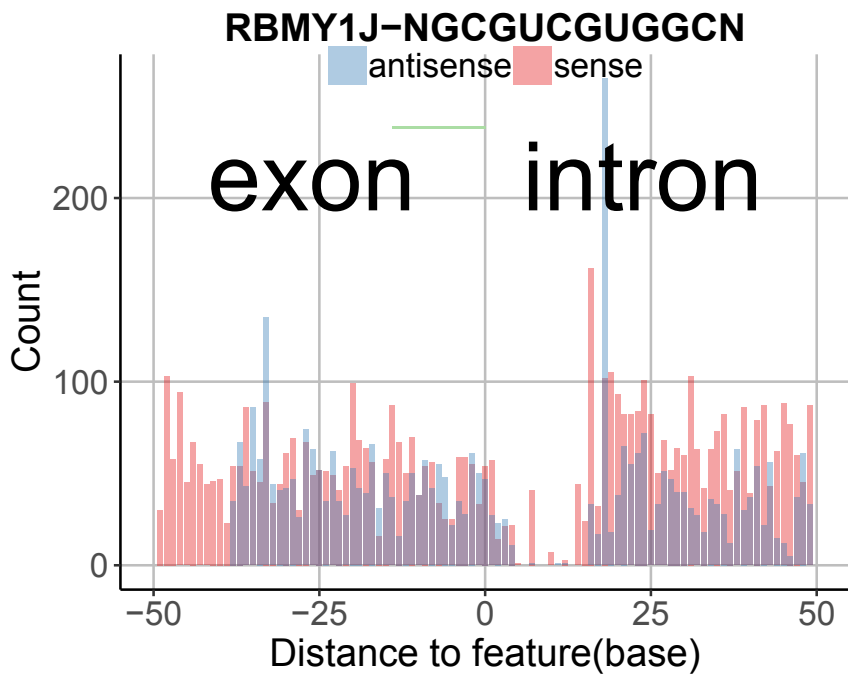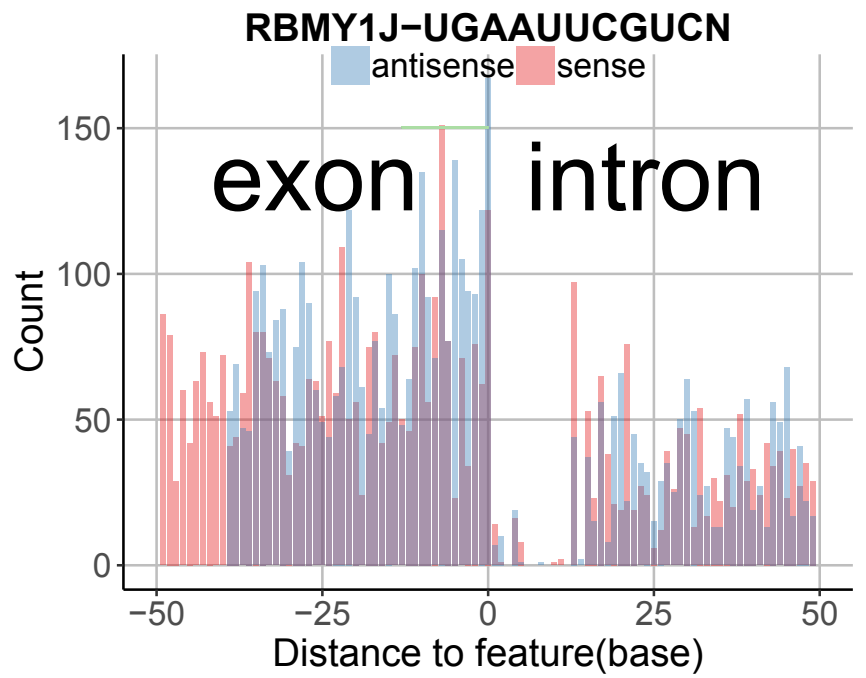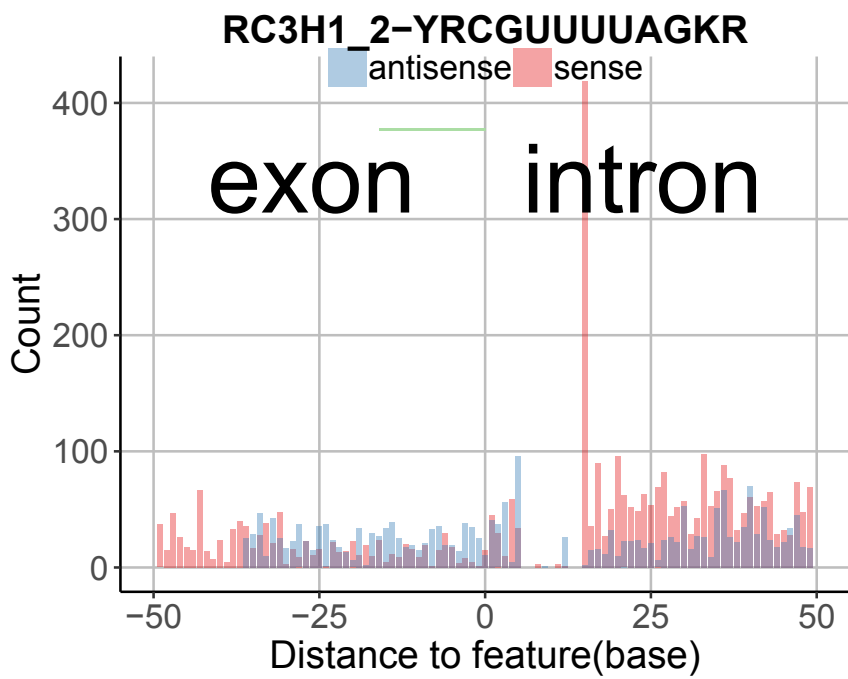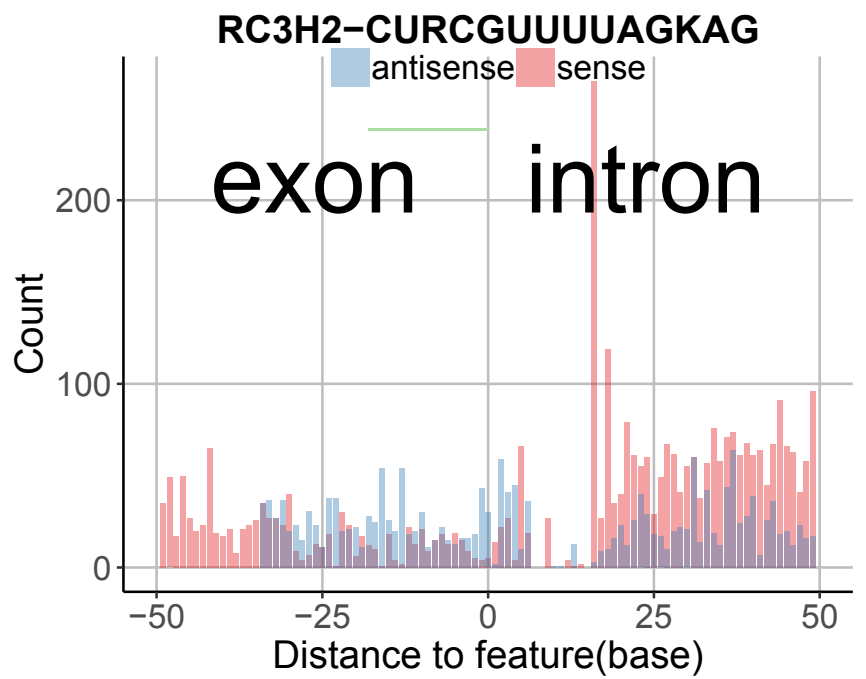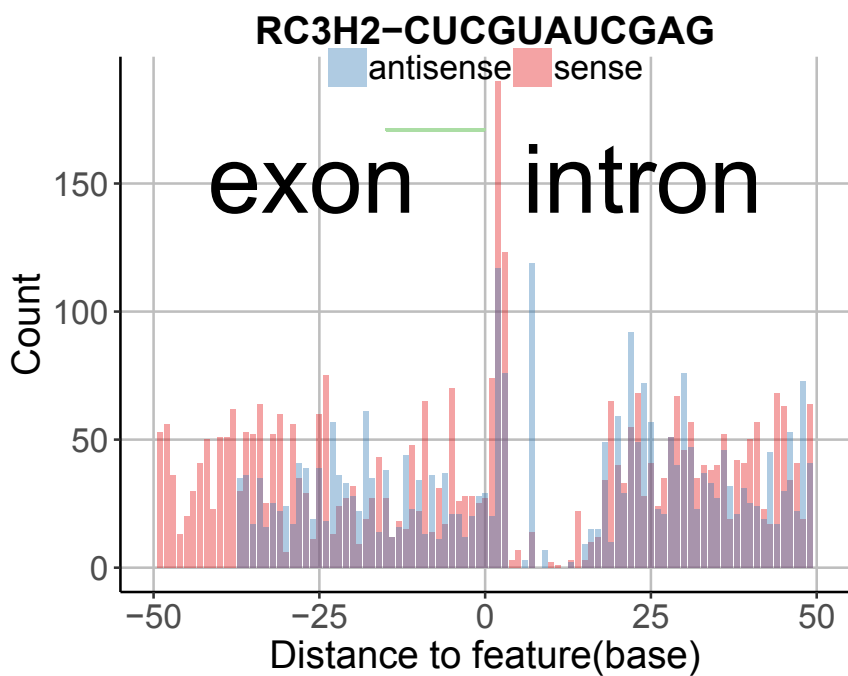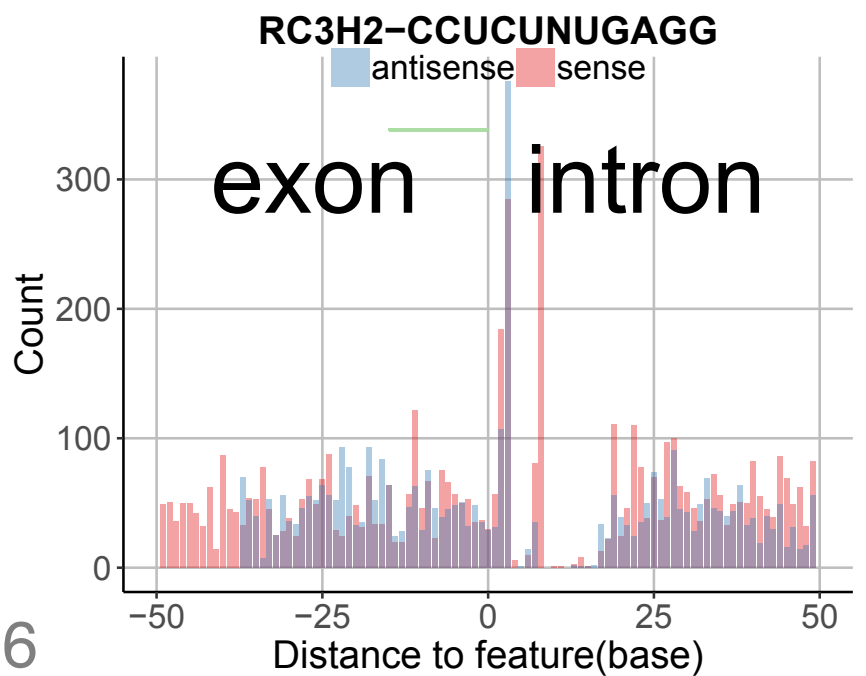

6



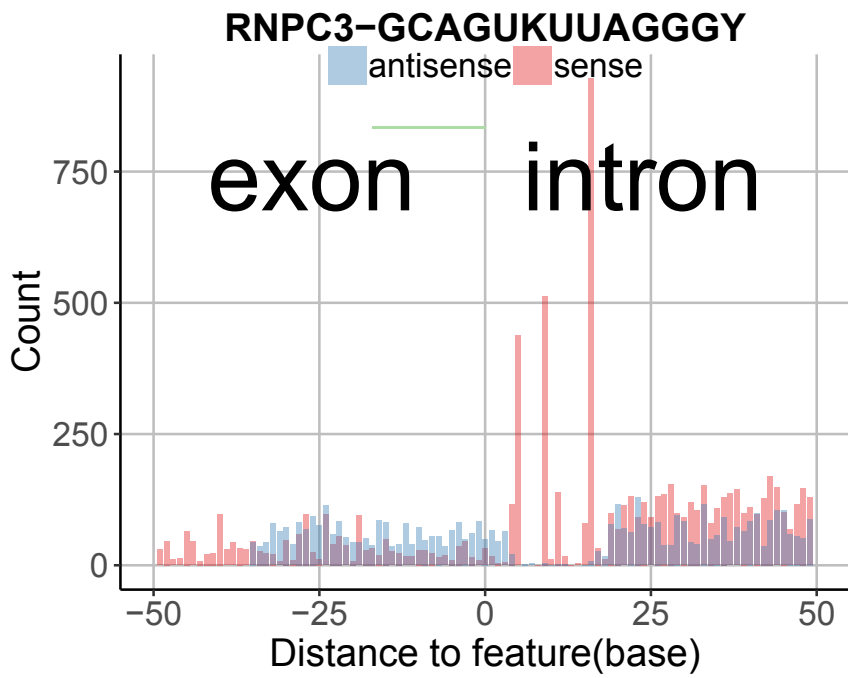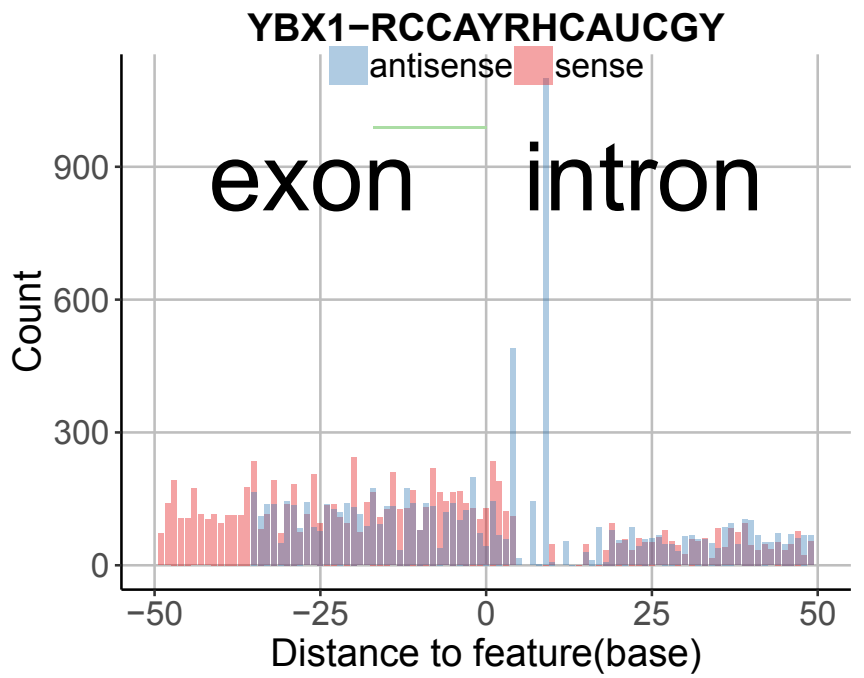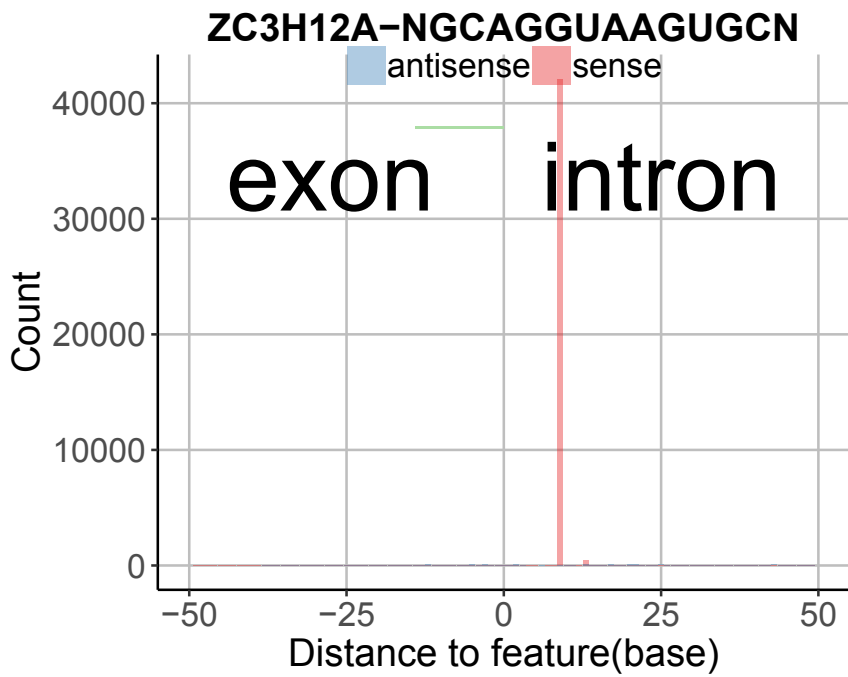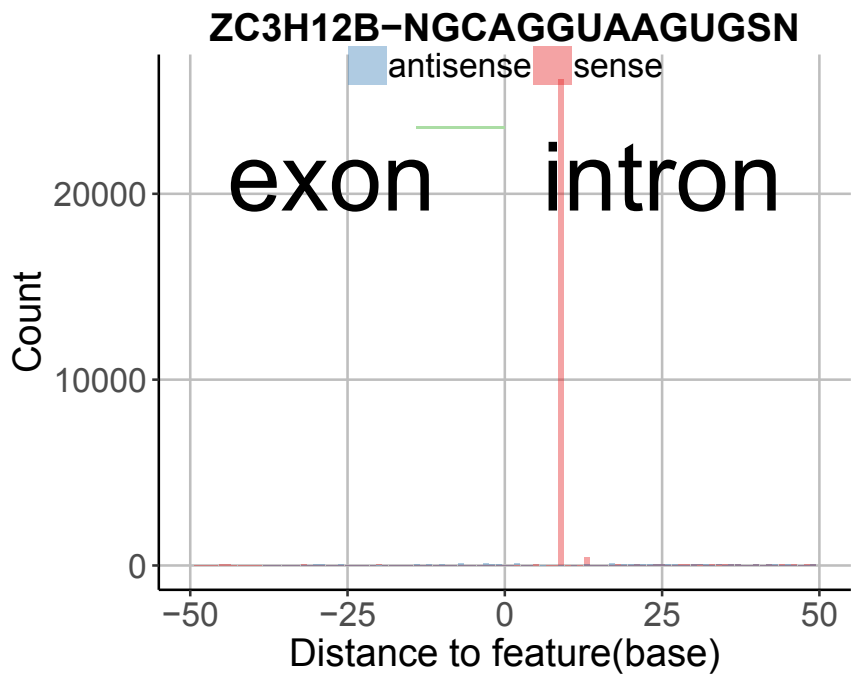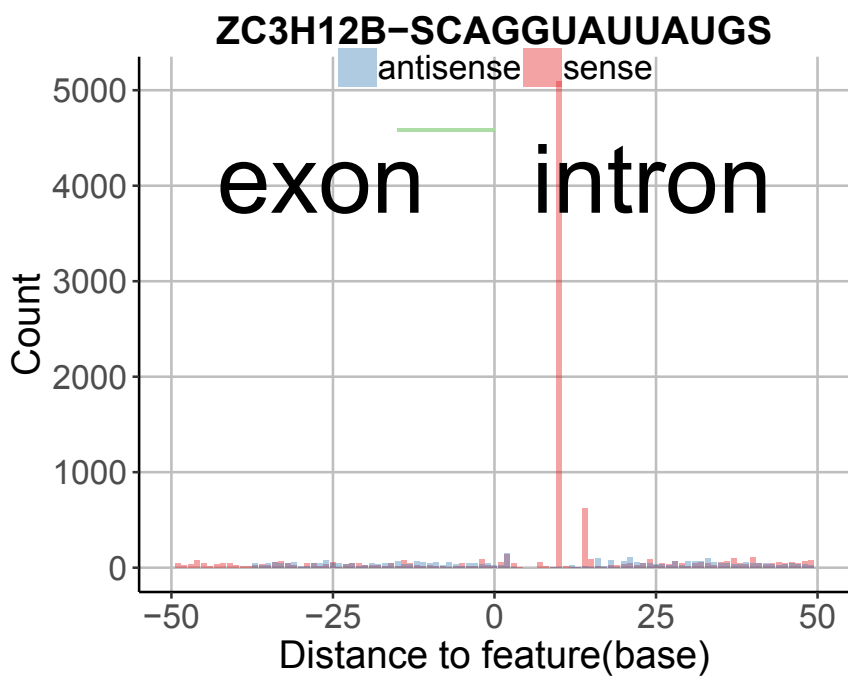

7

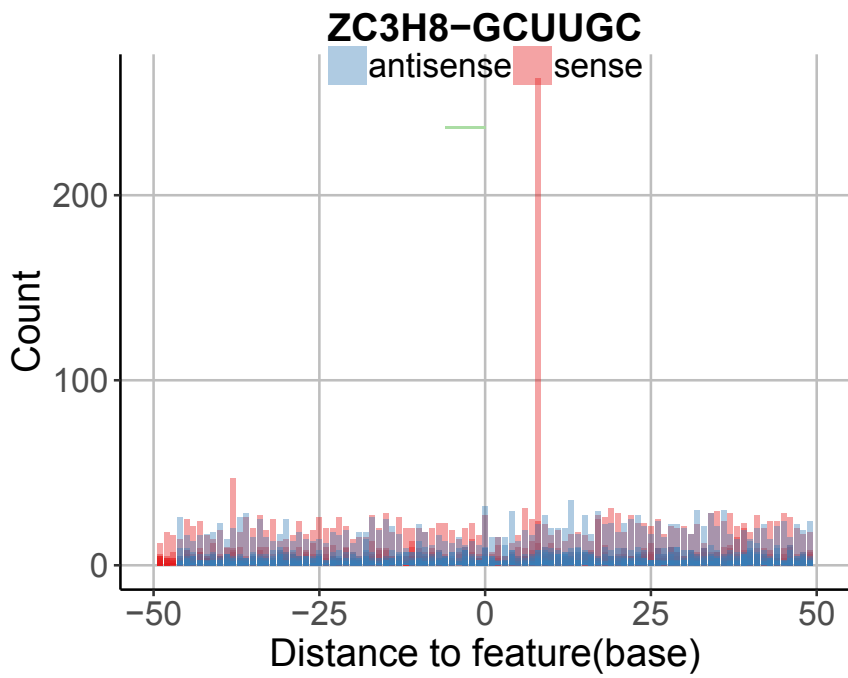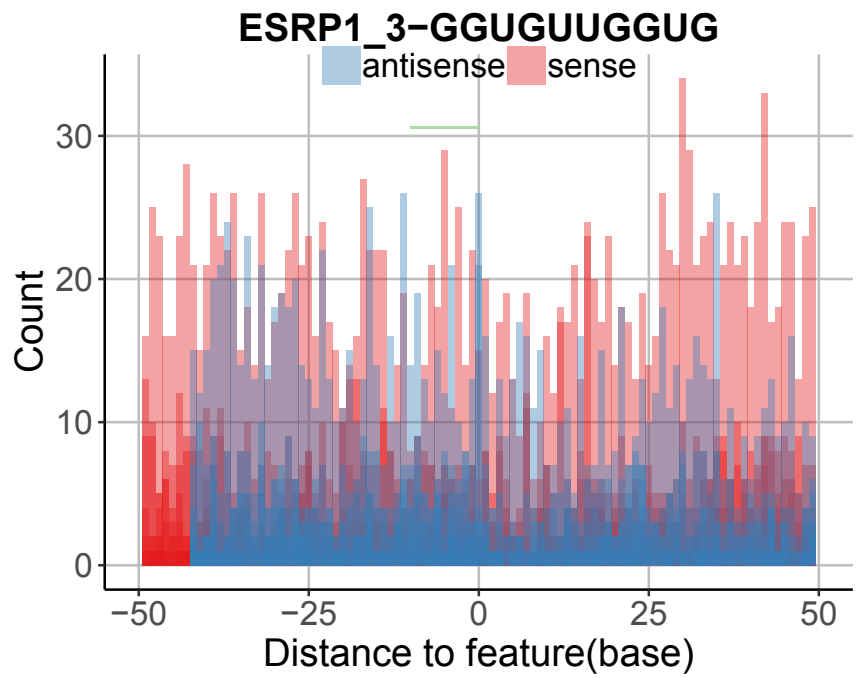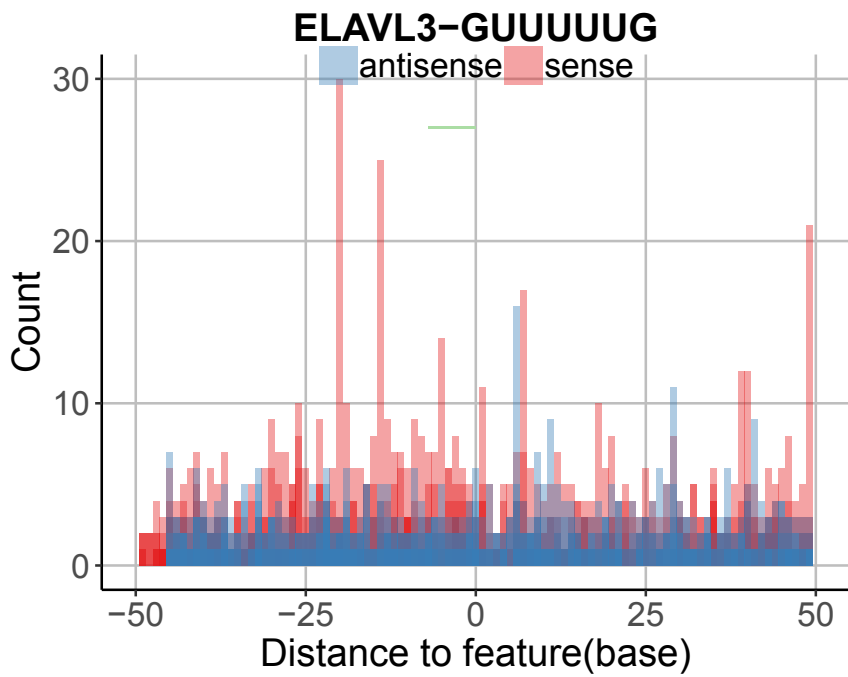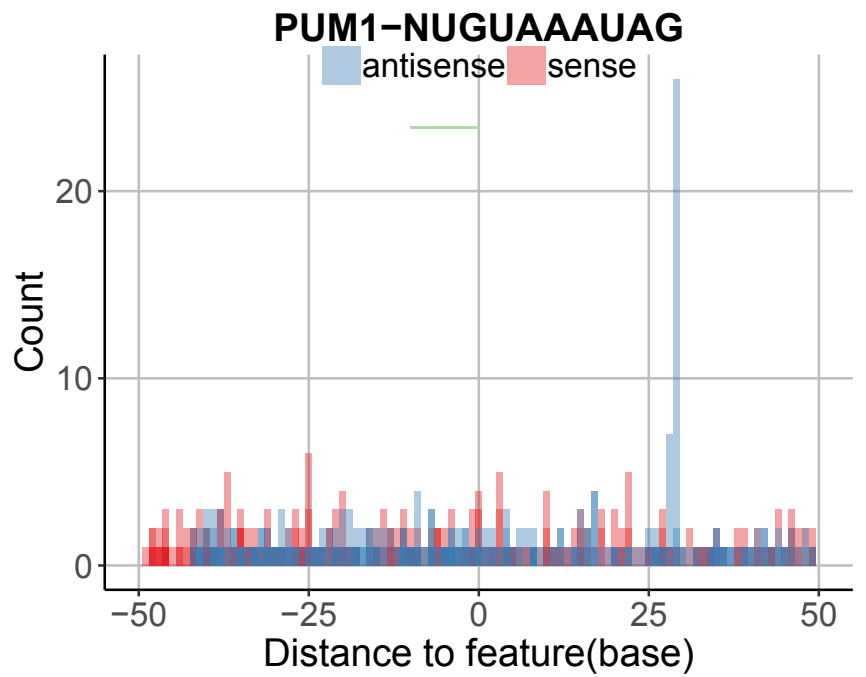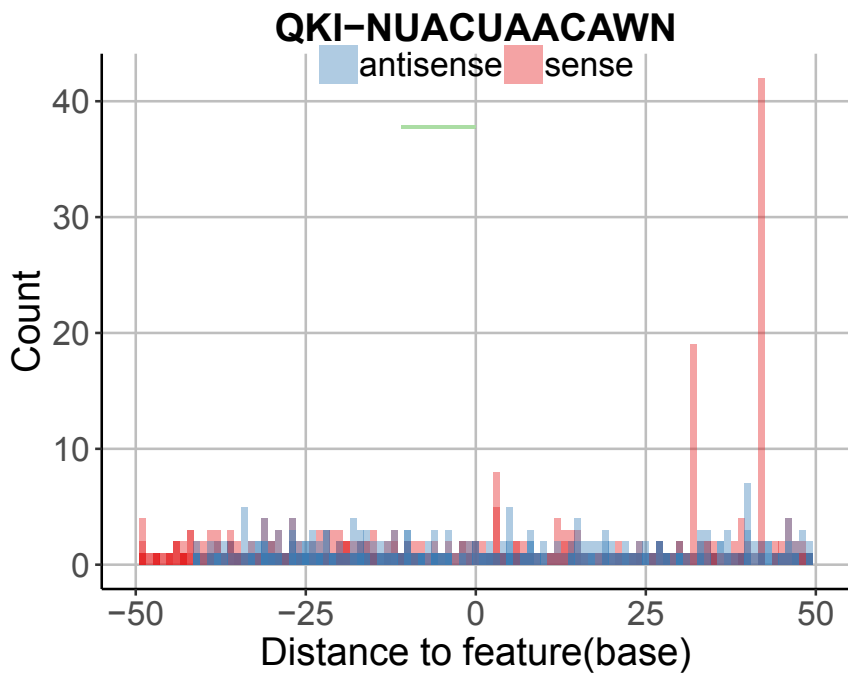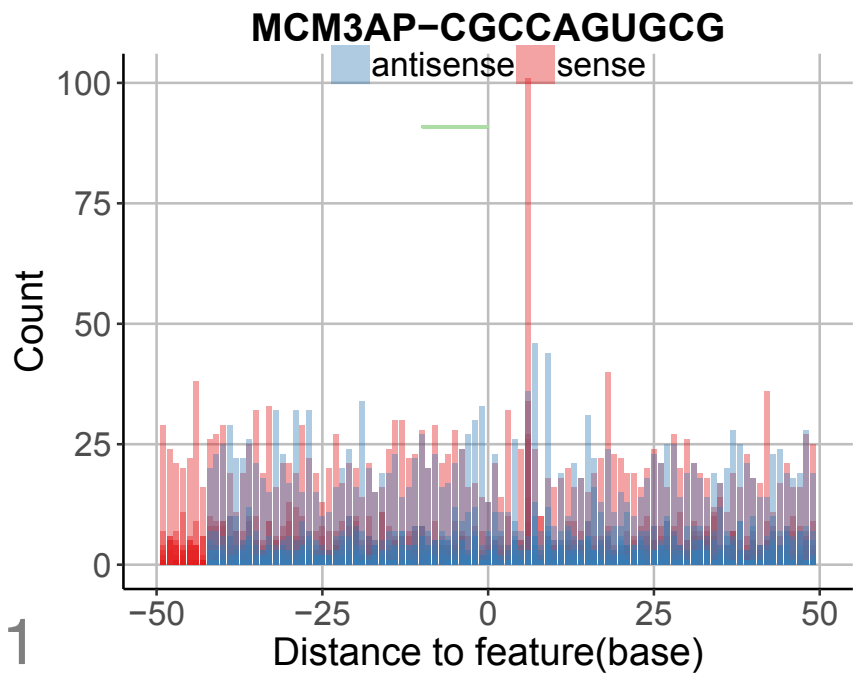

1

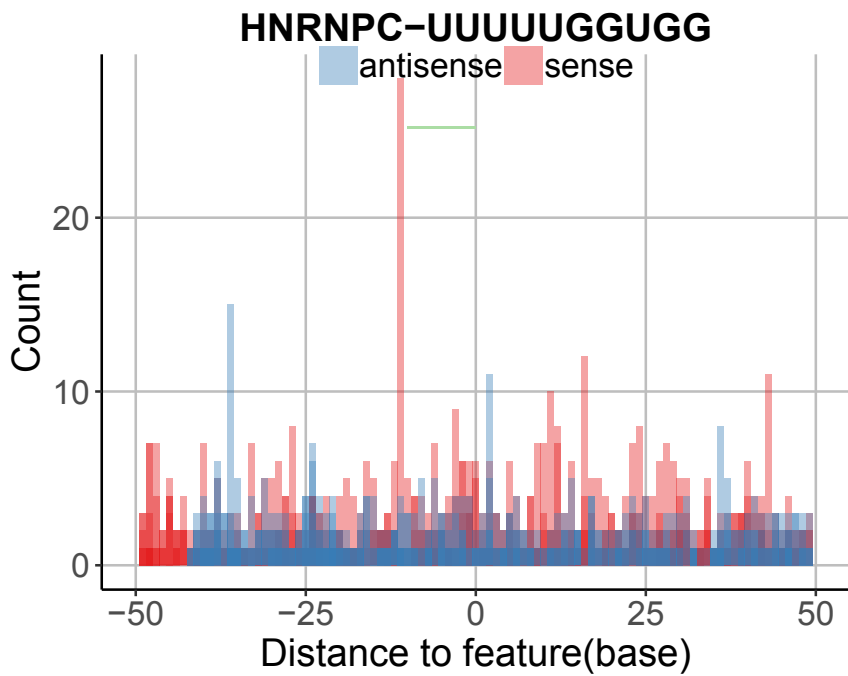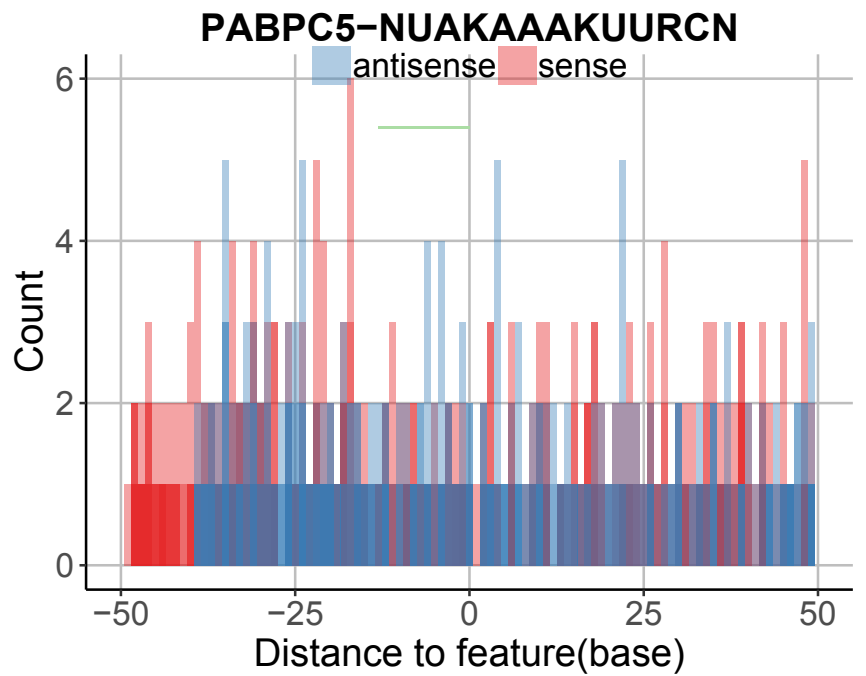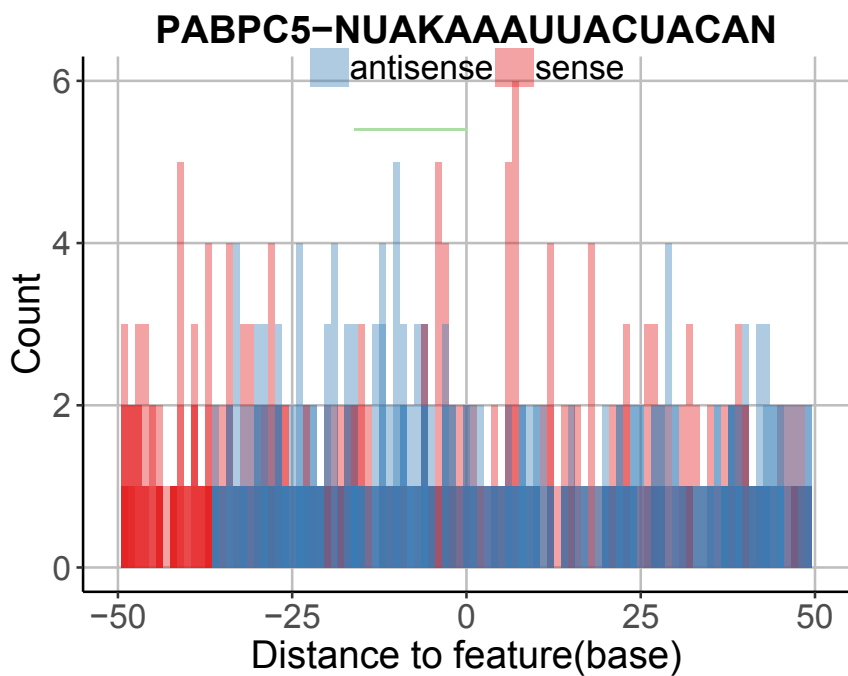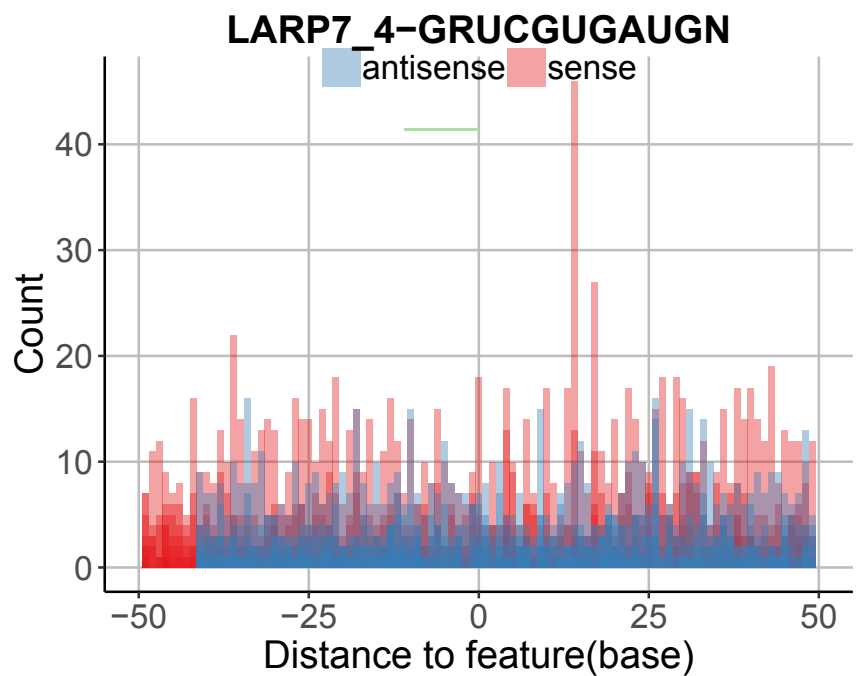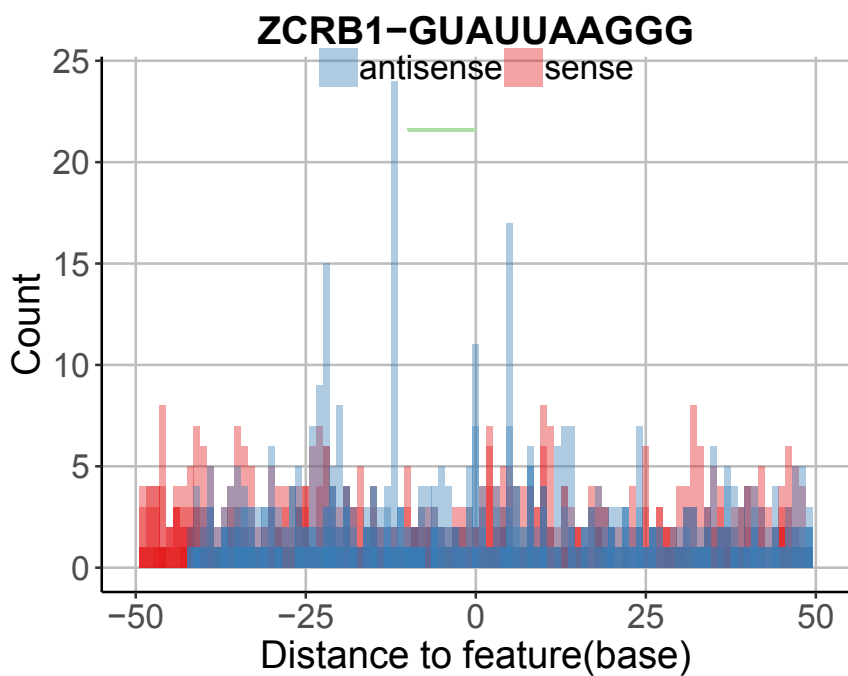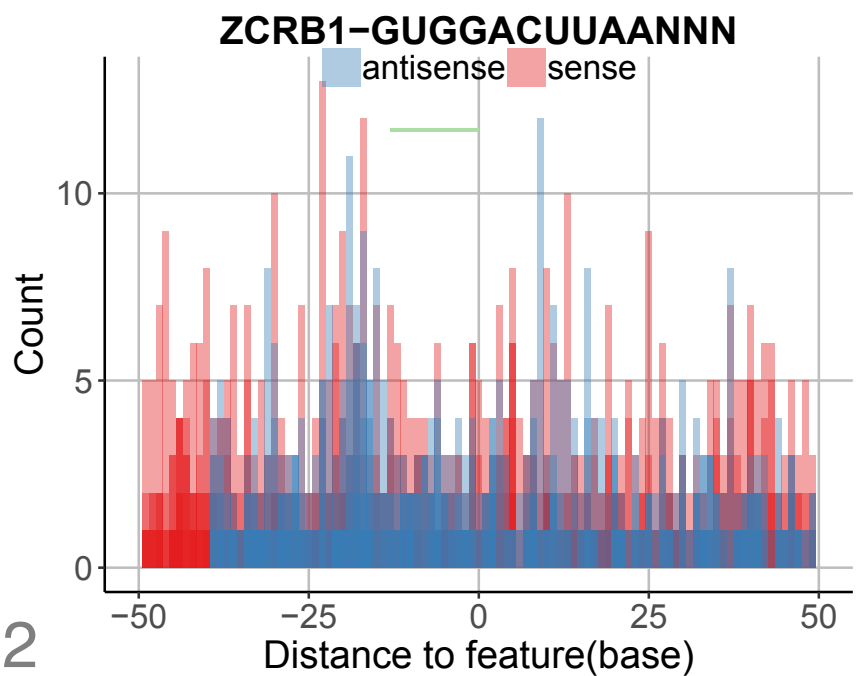

2

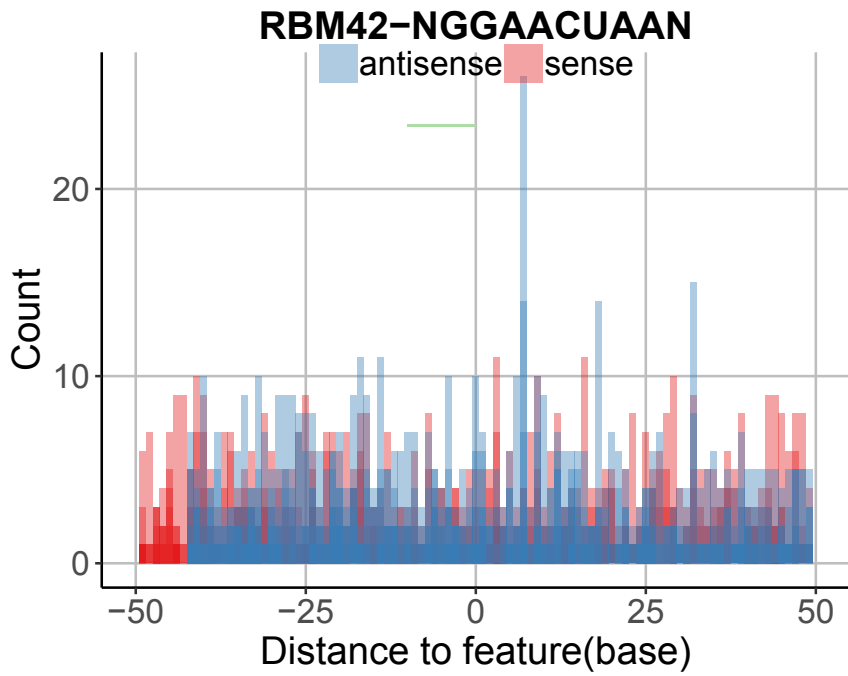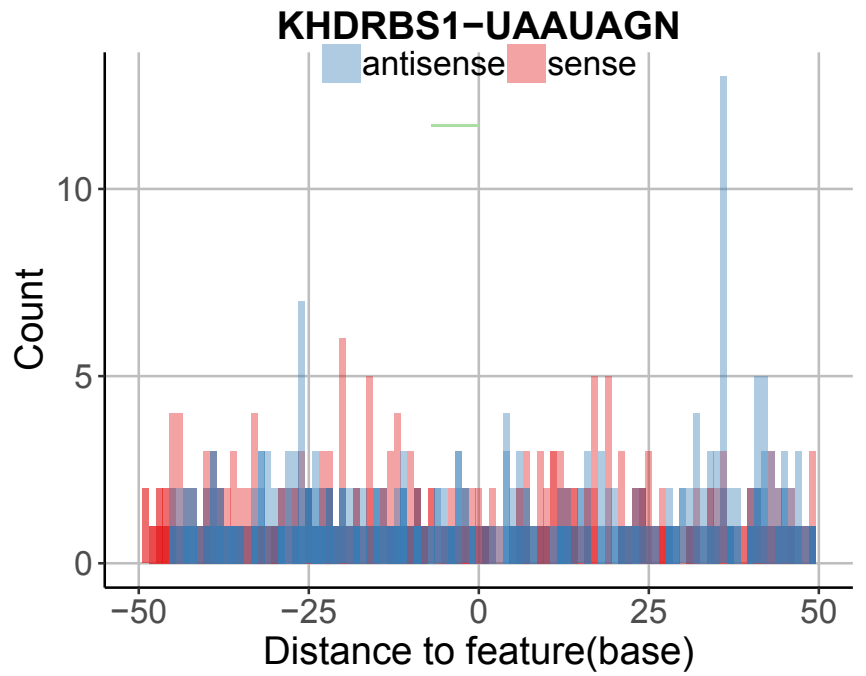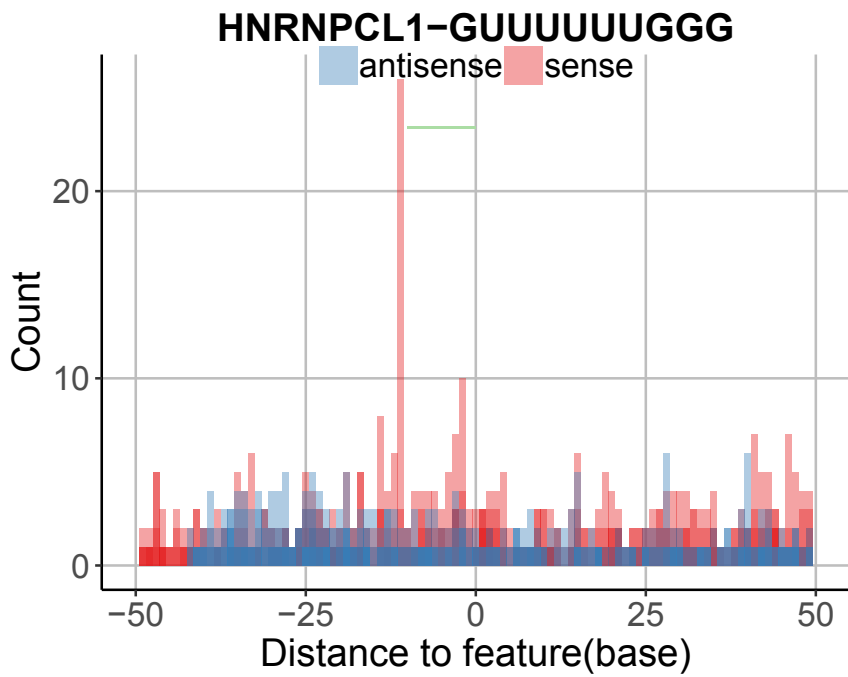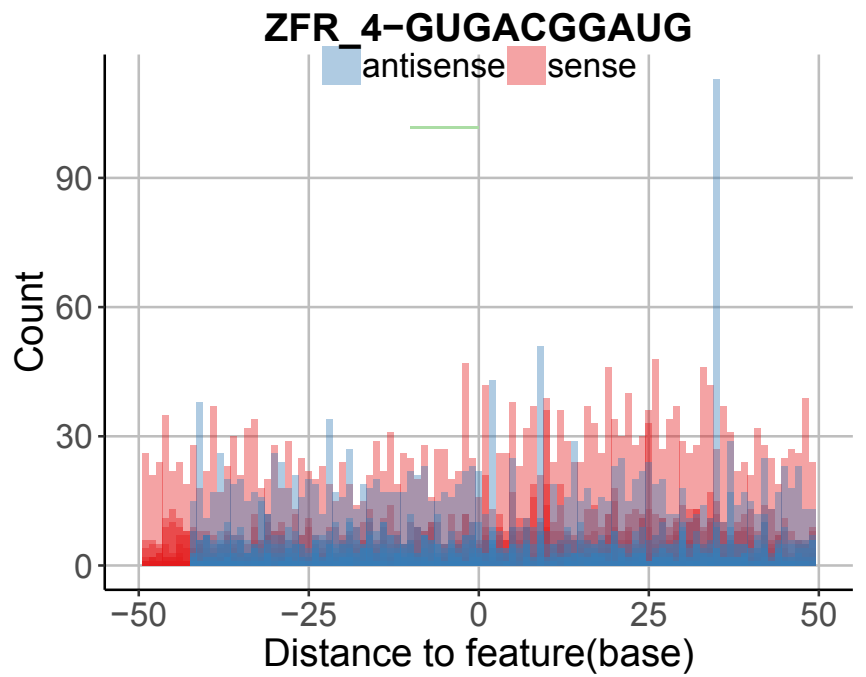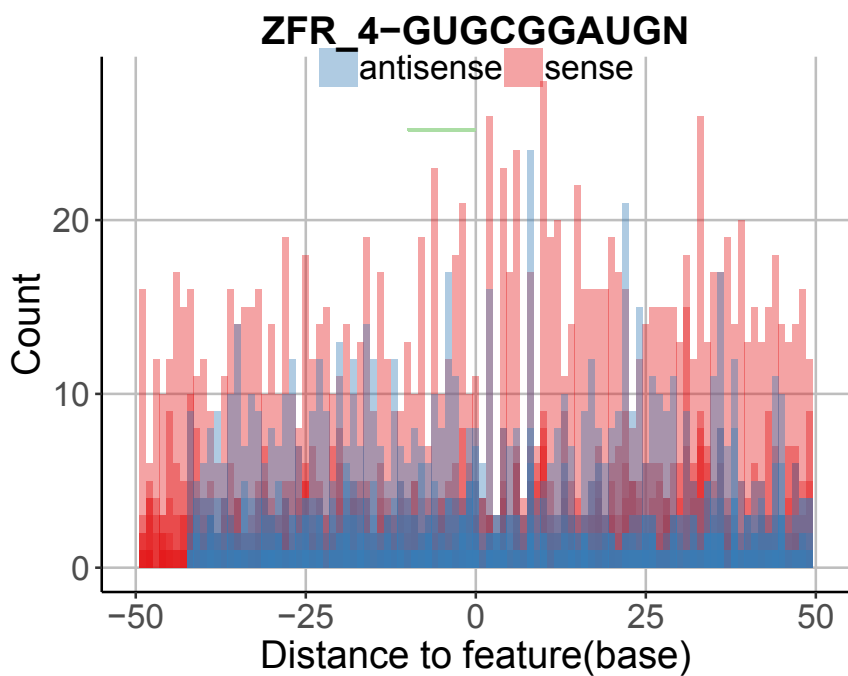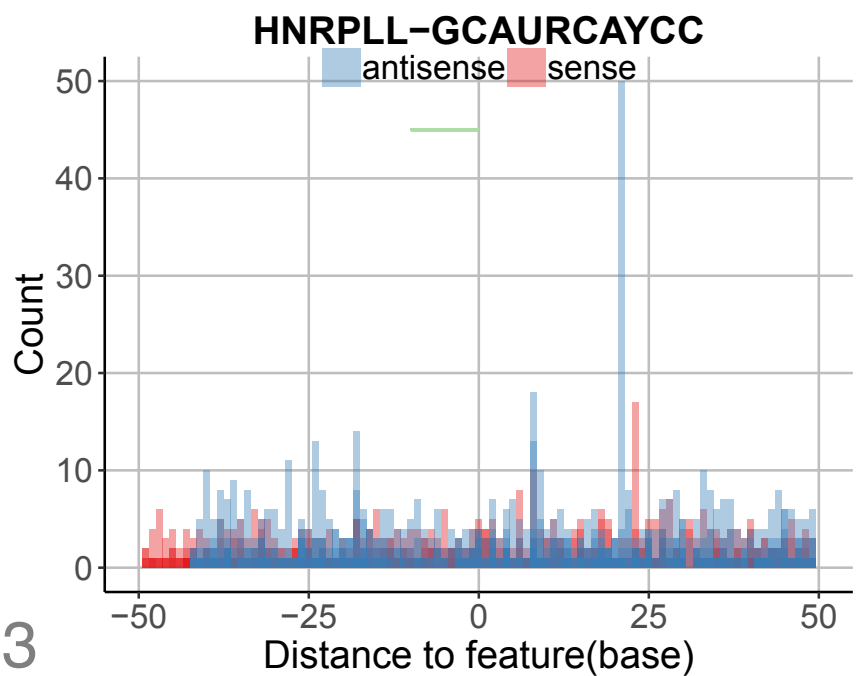

3

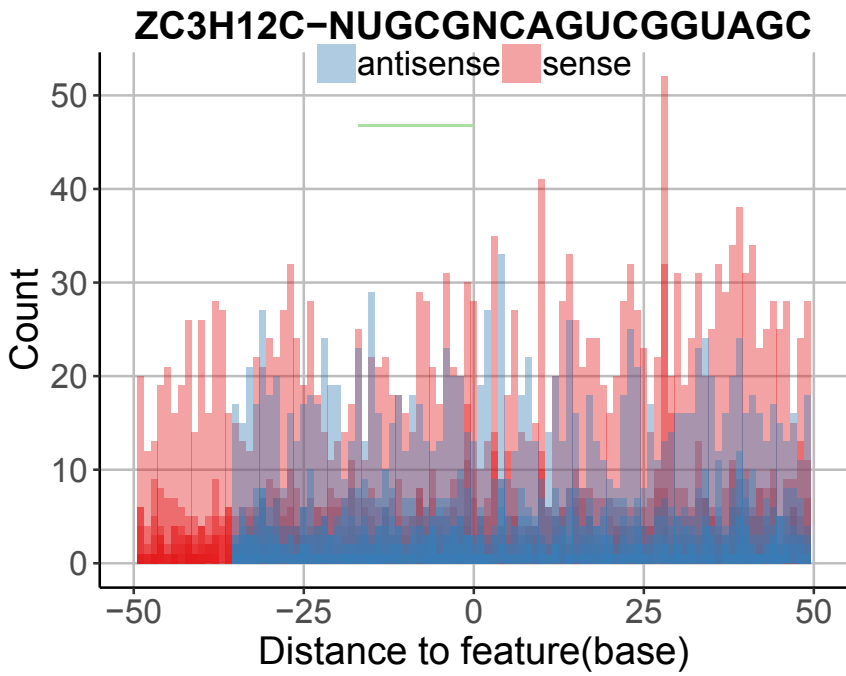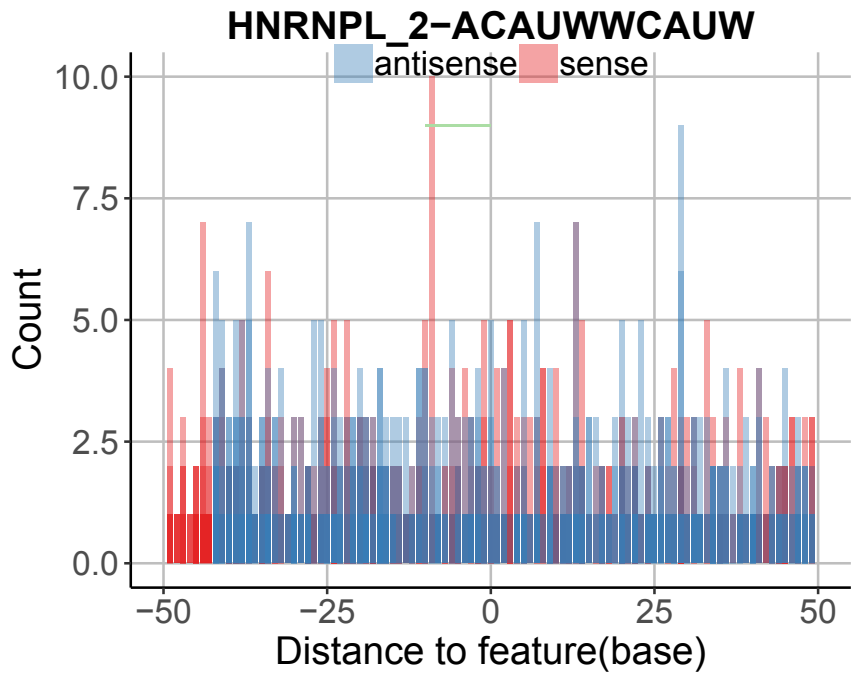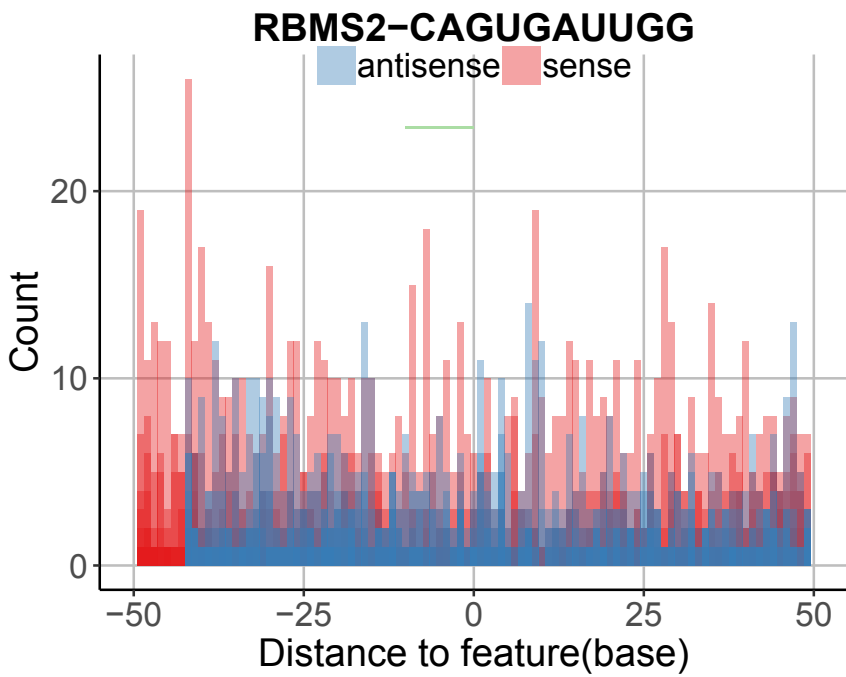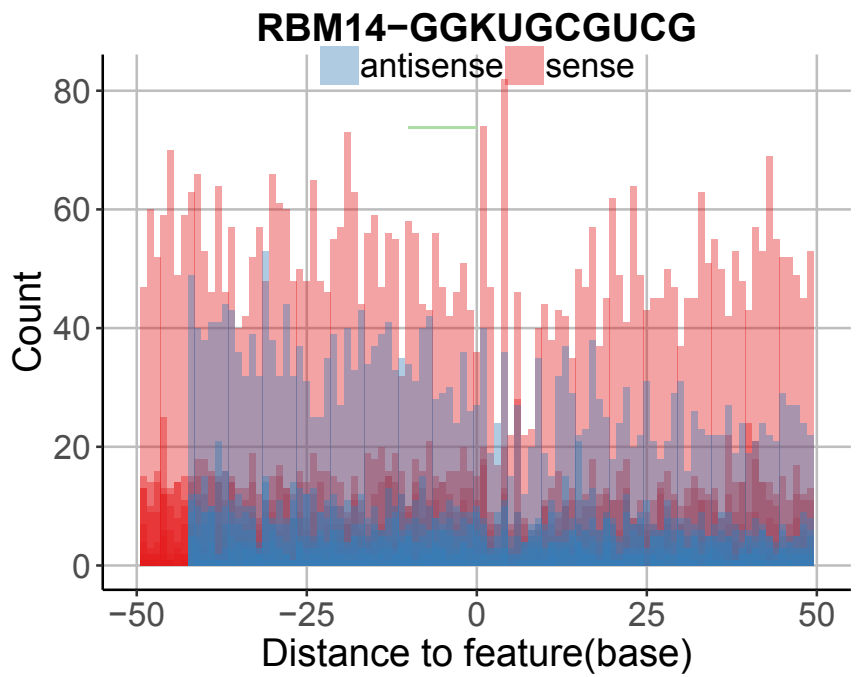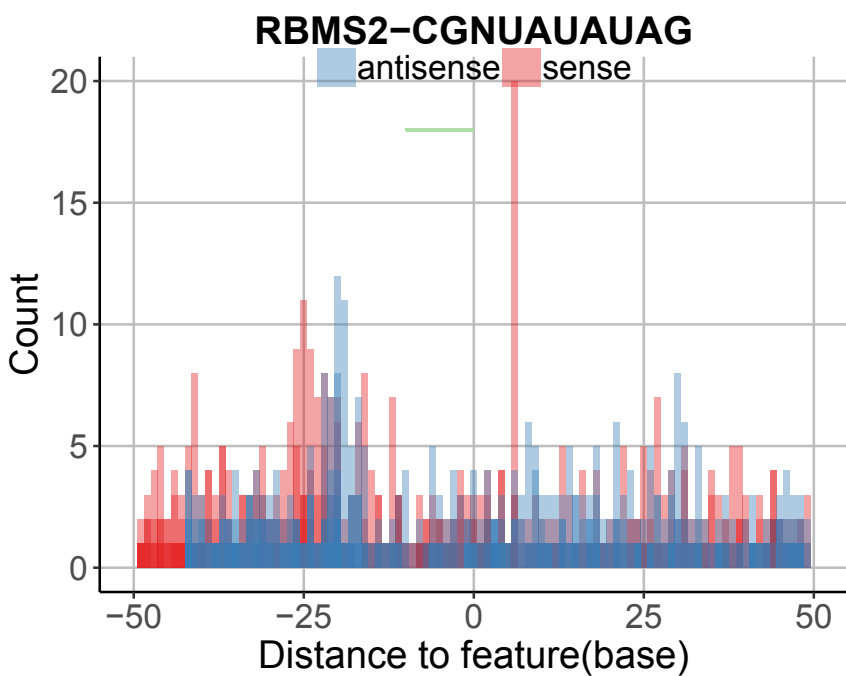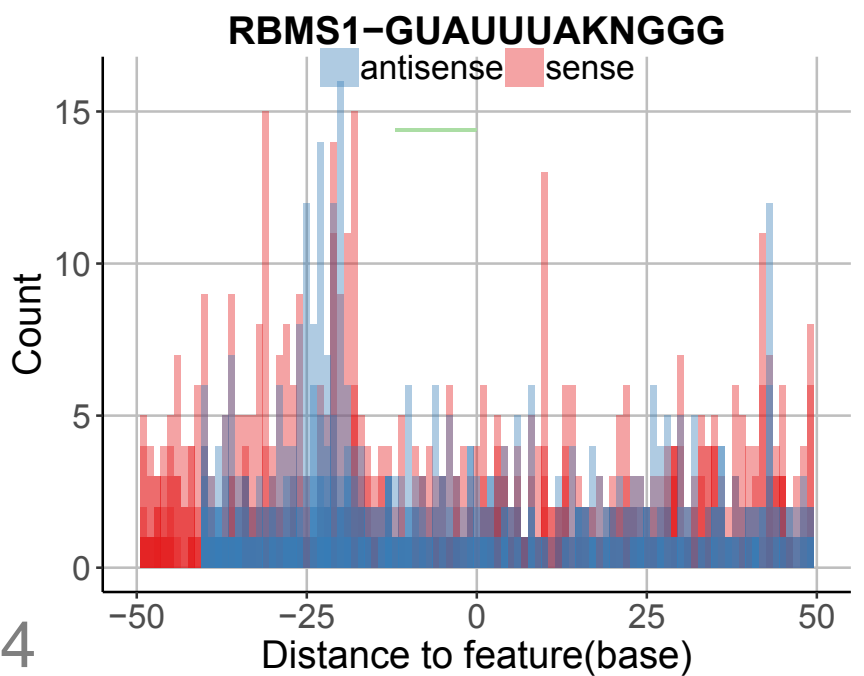

4

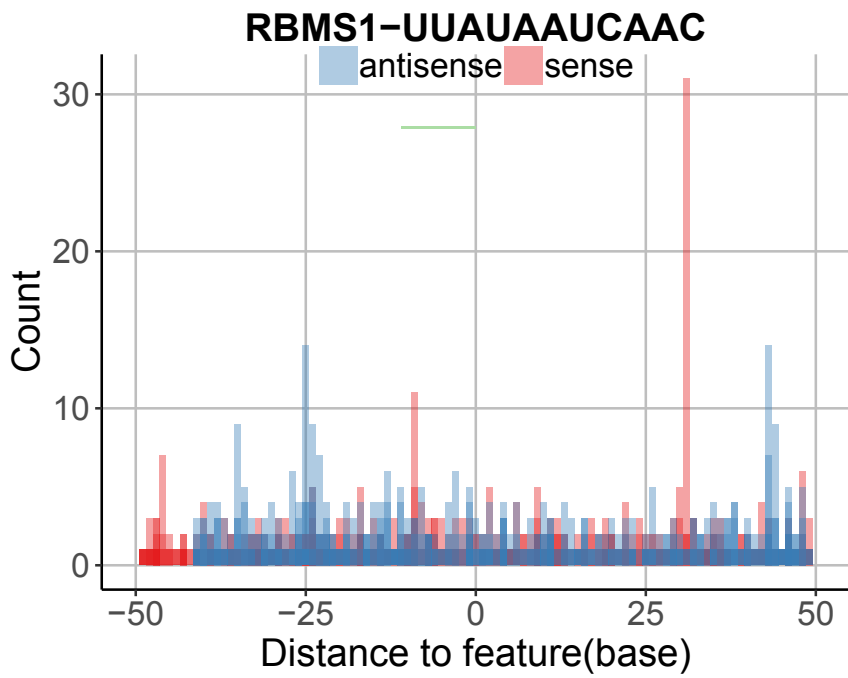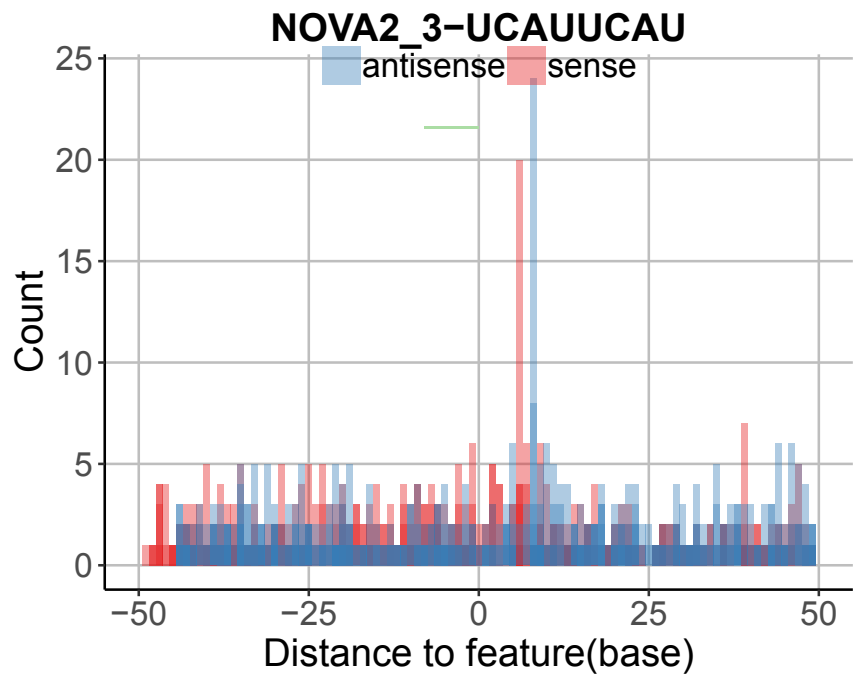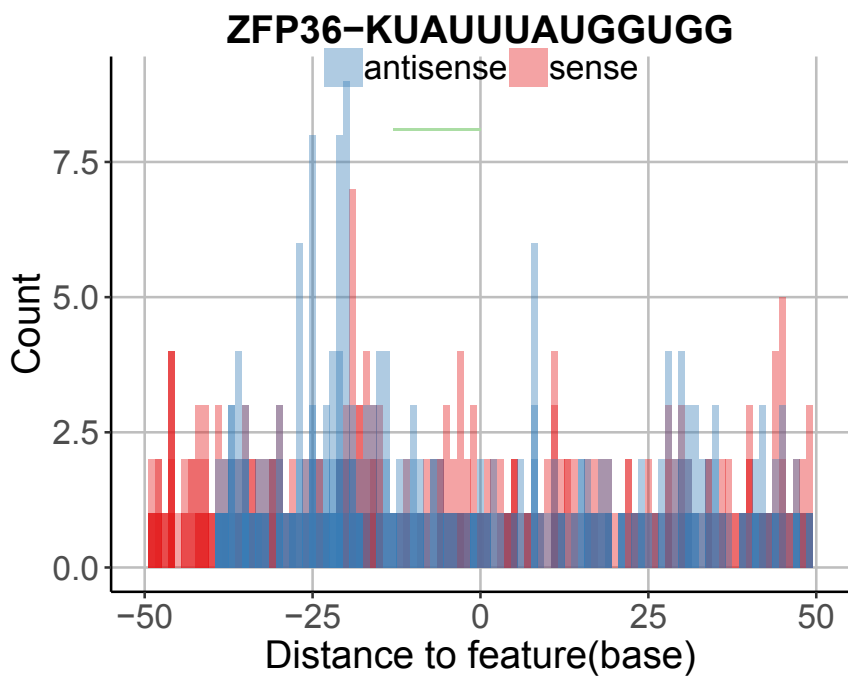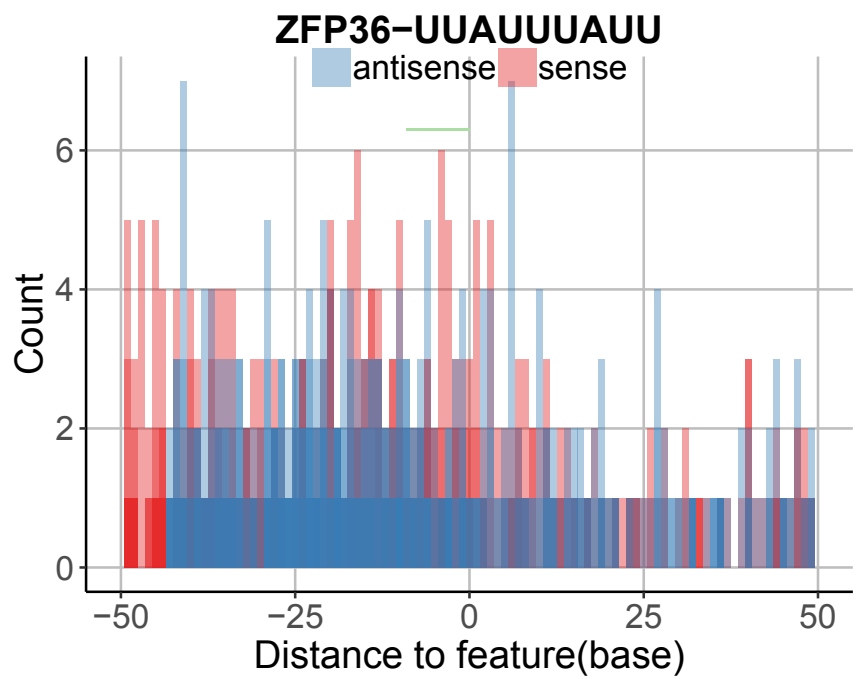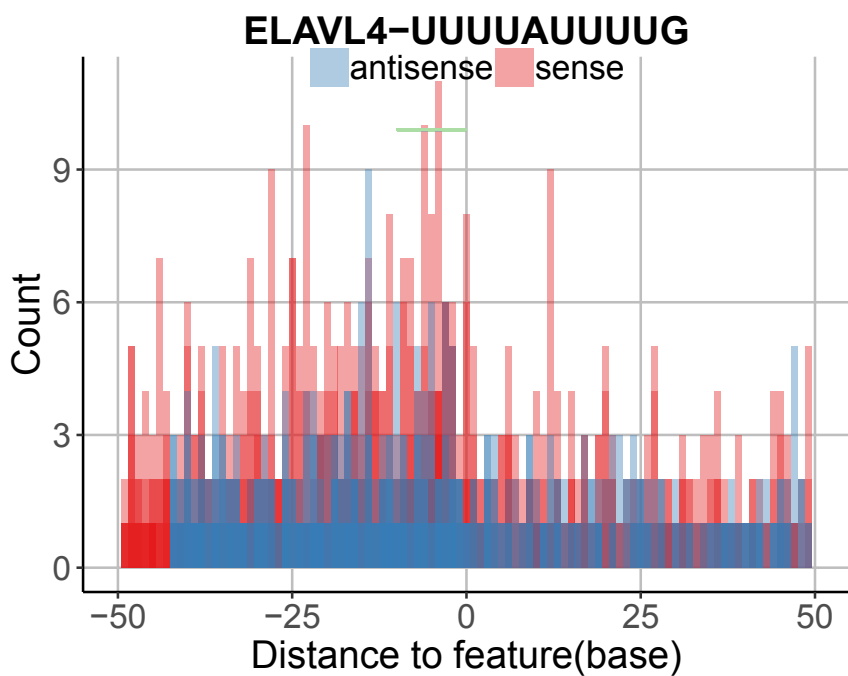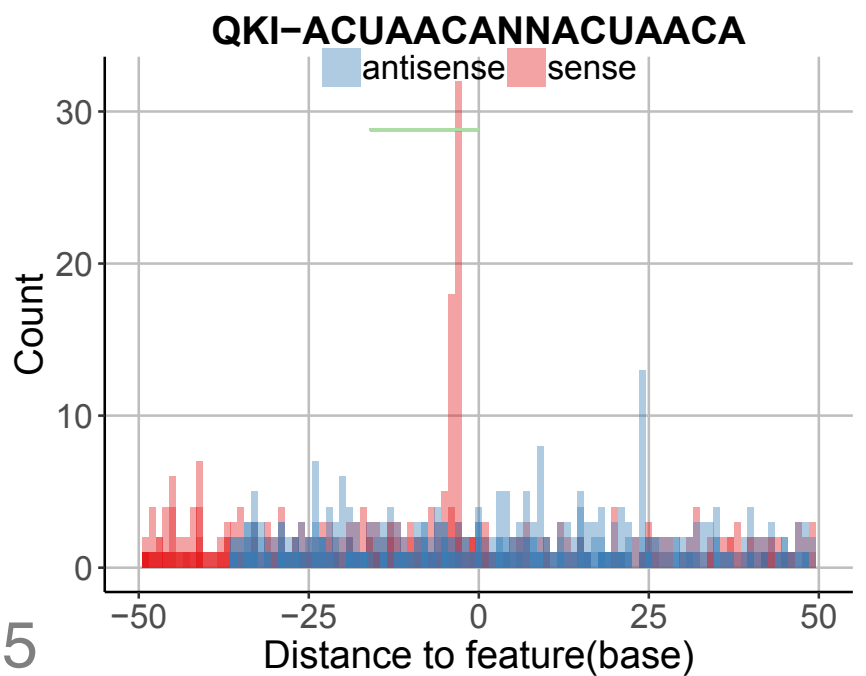

5

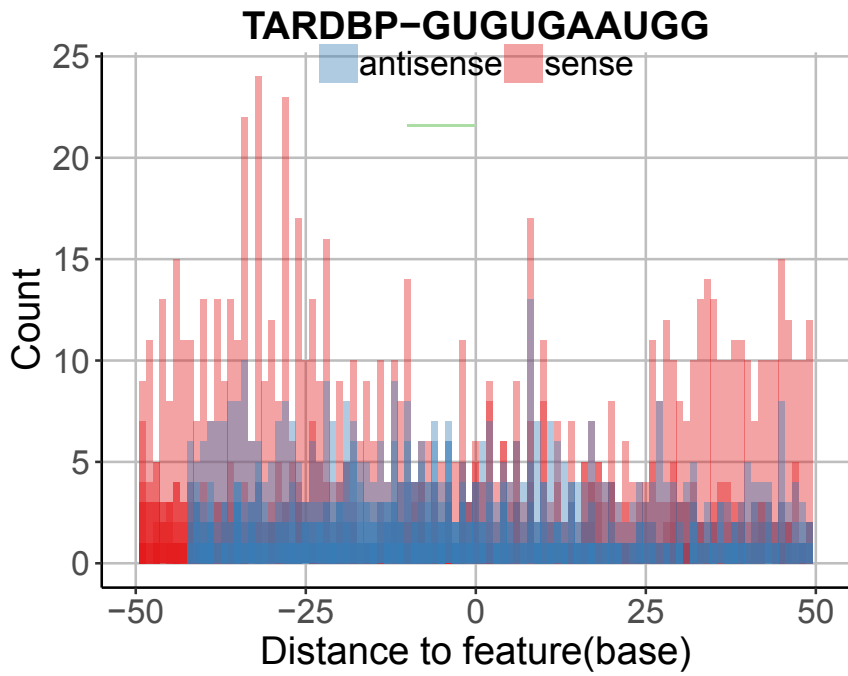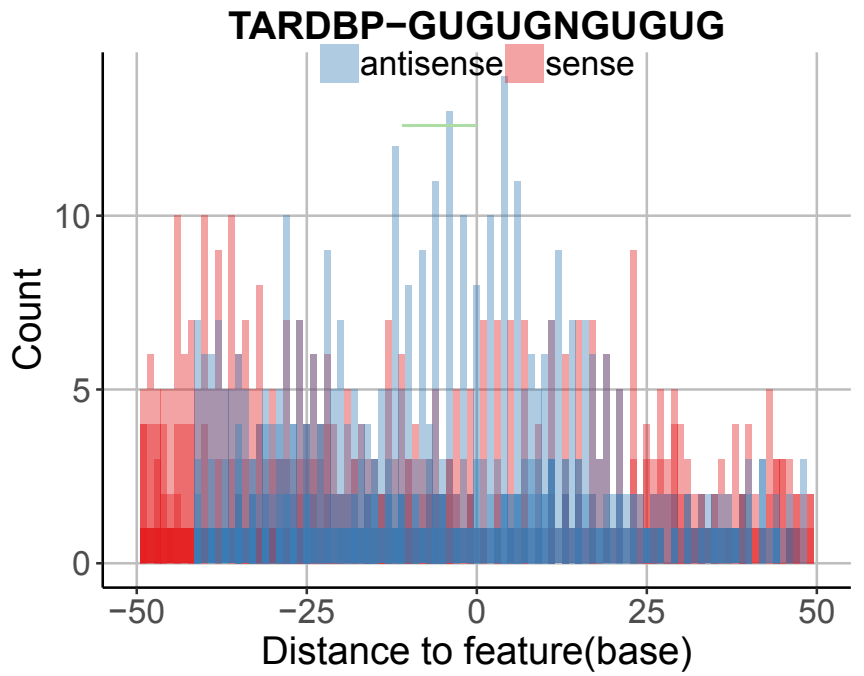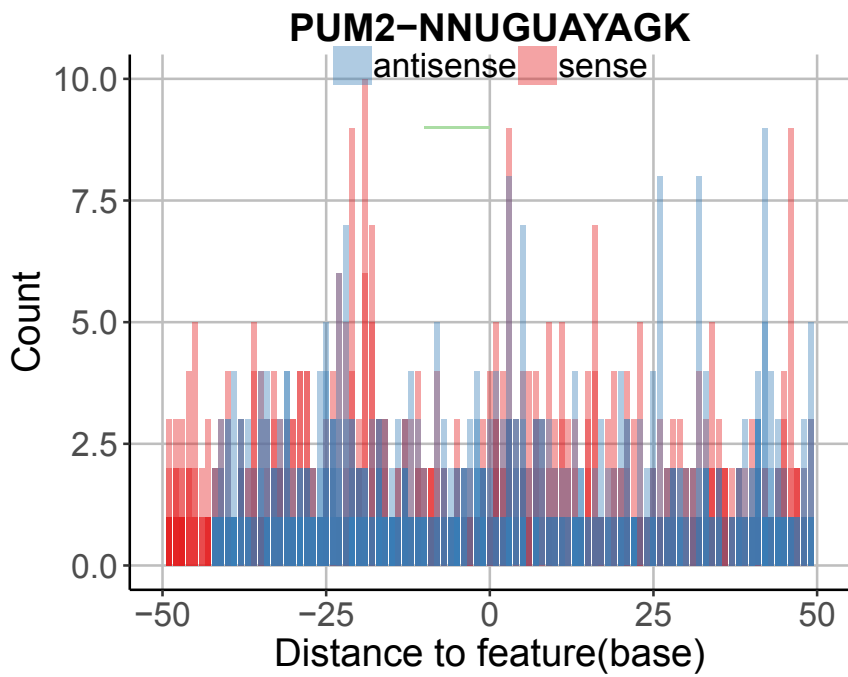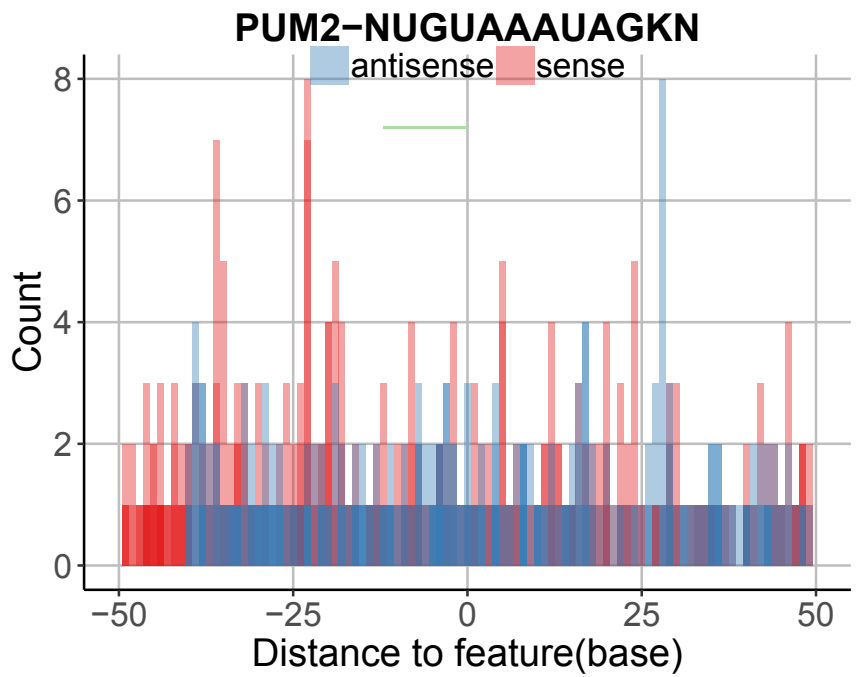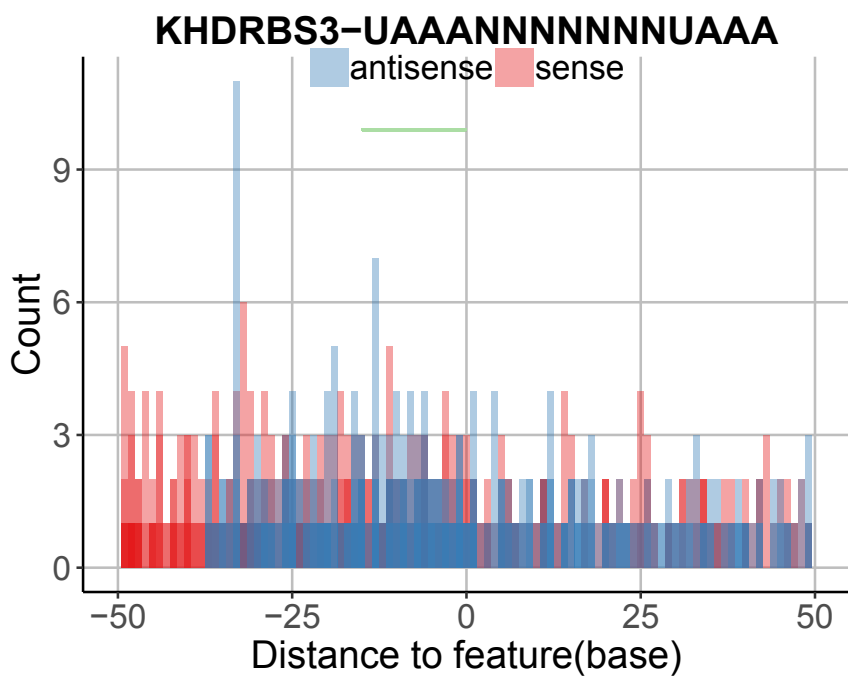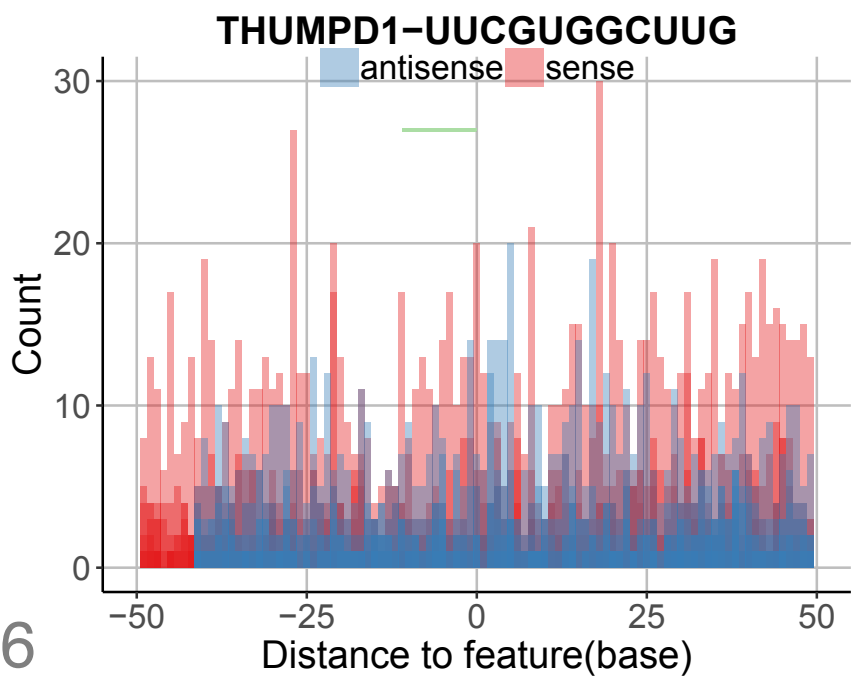

6

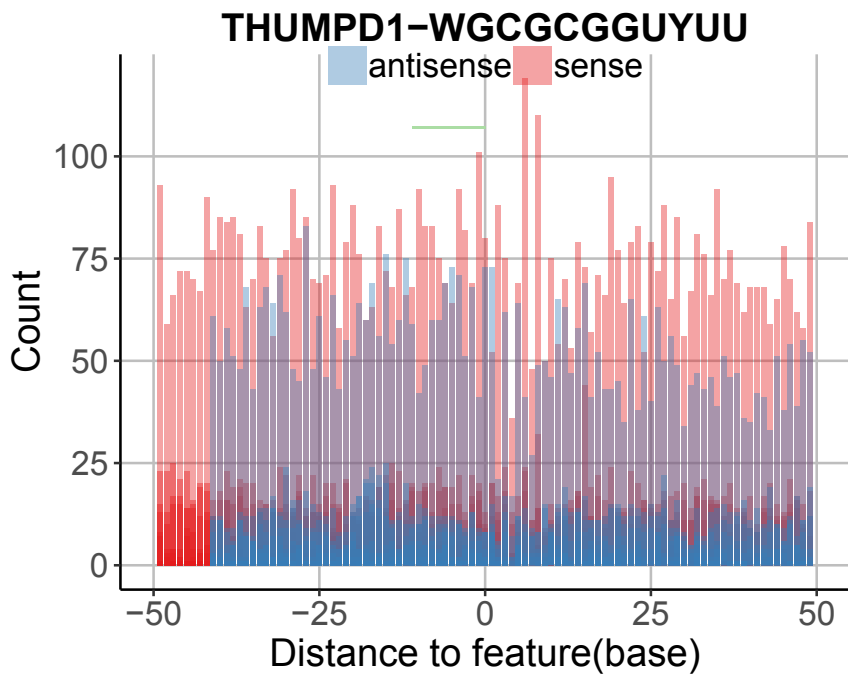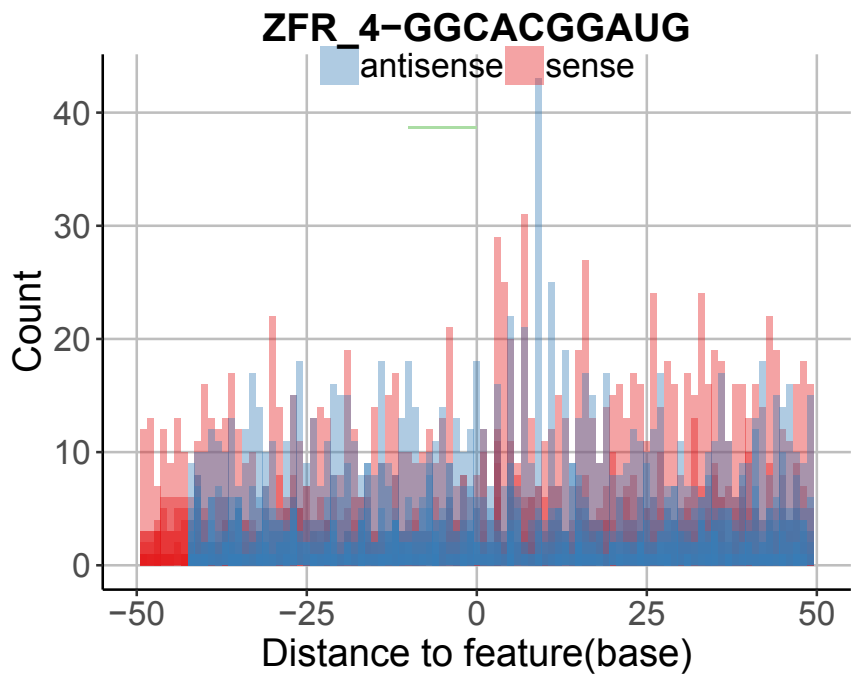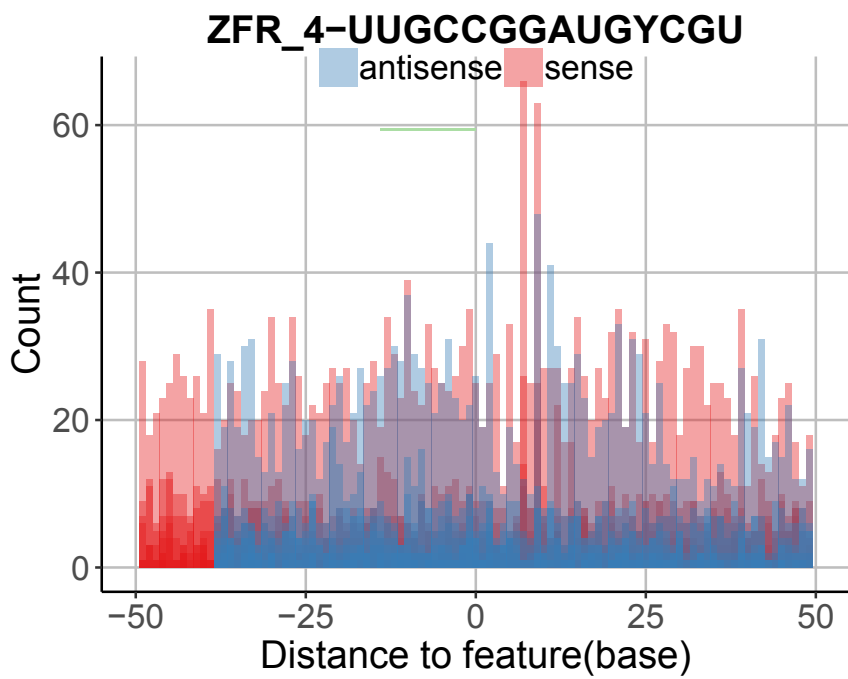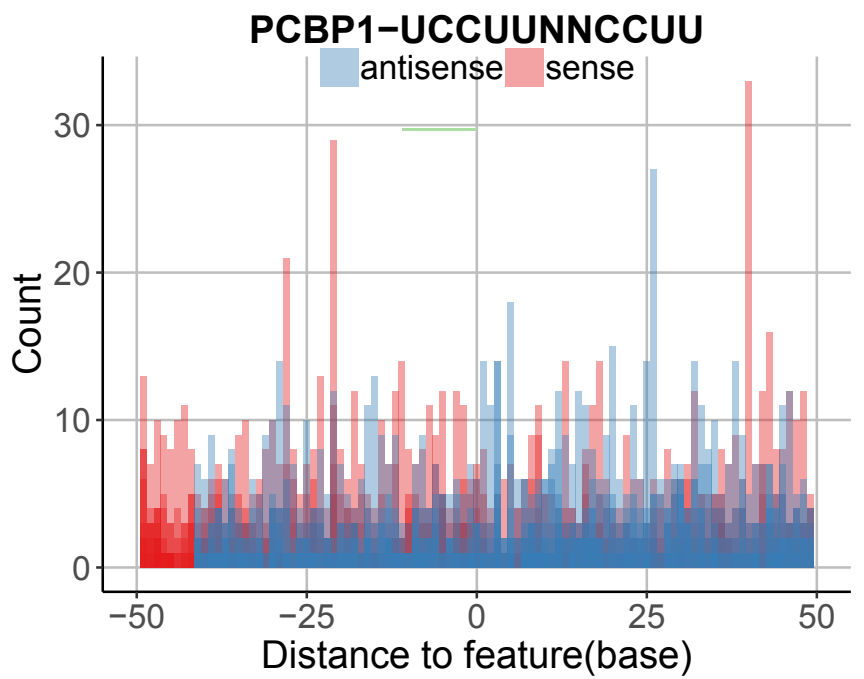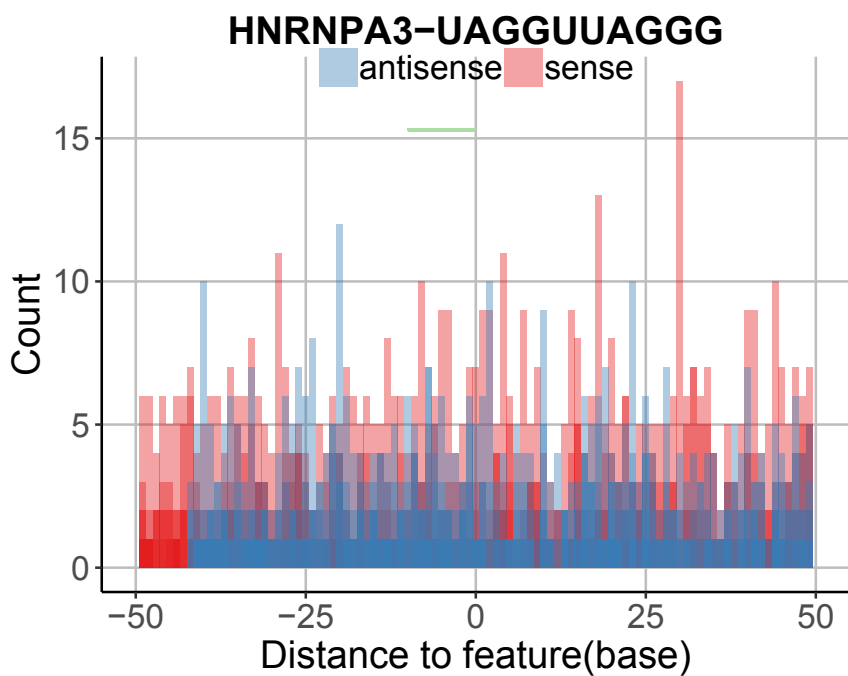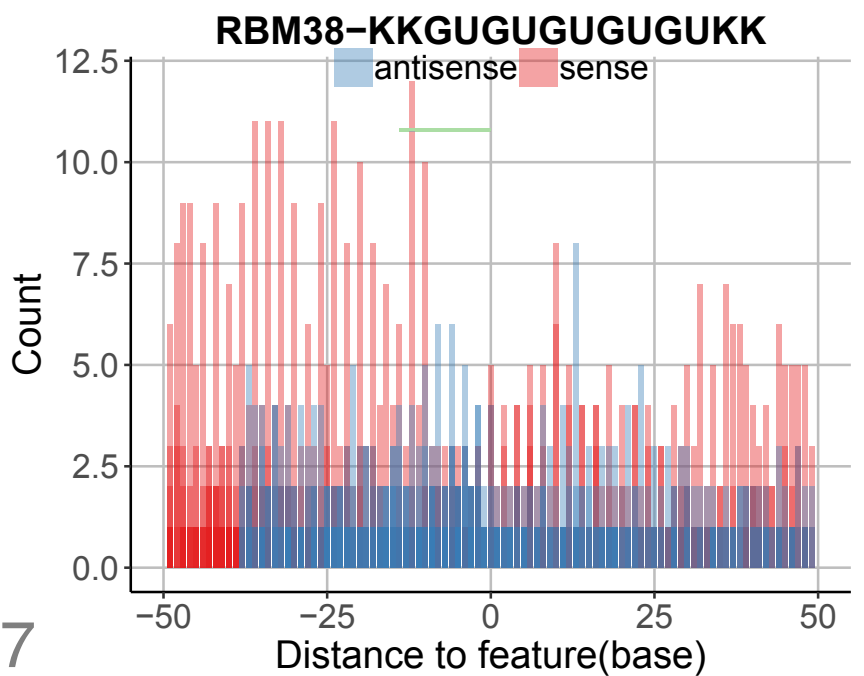

7



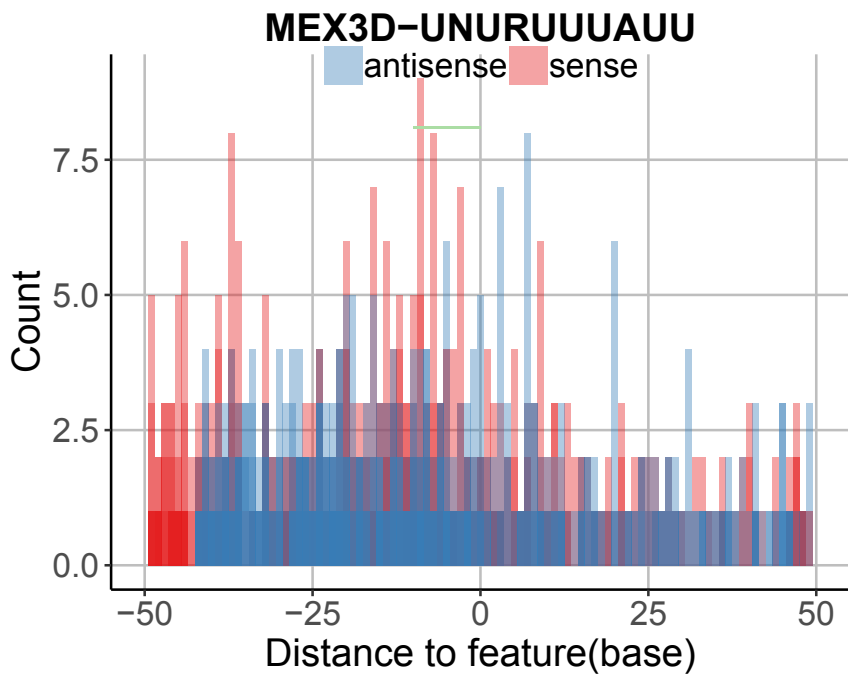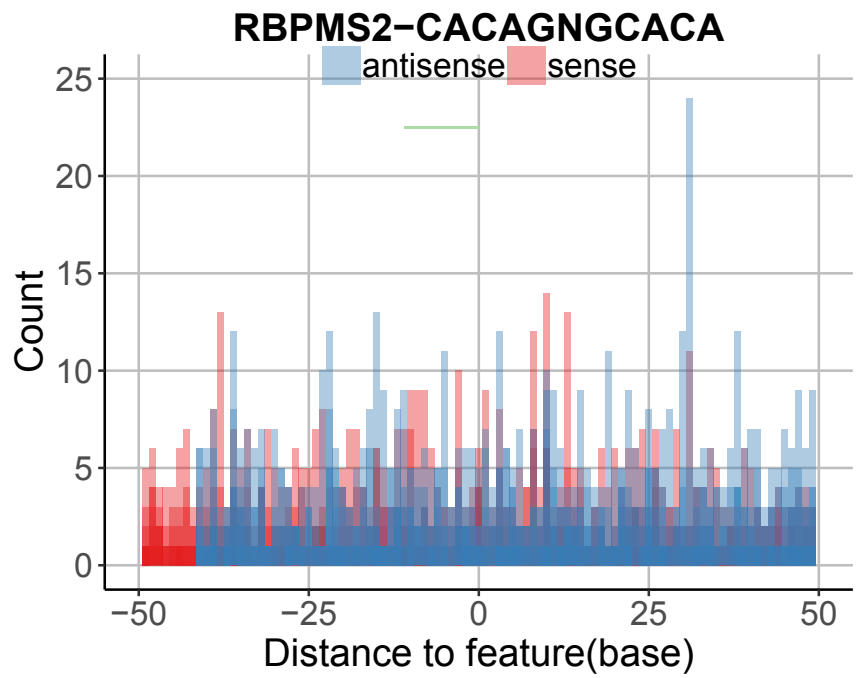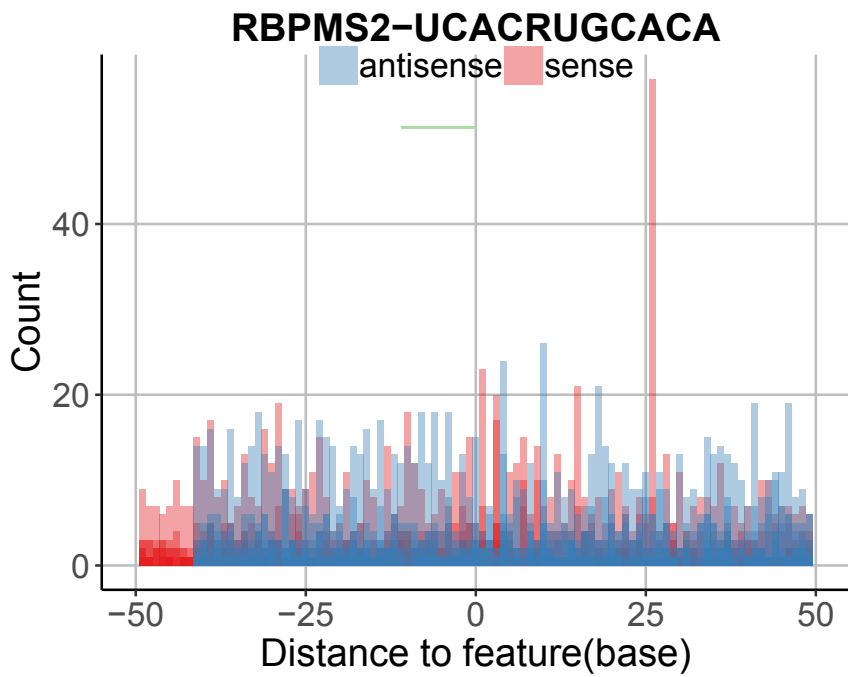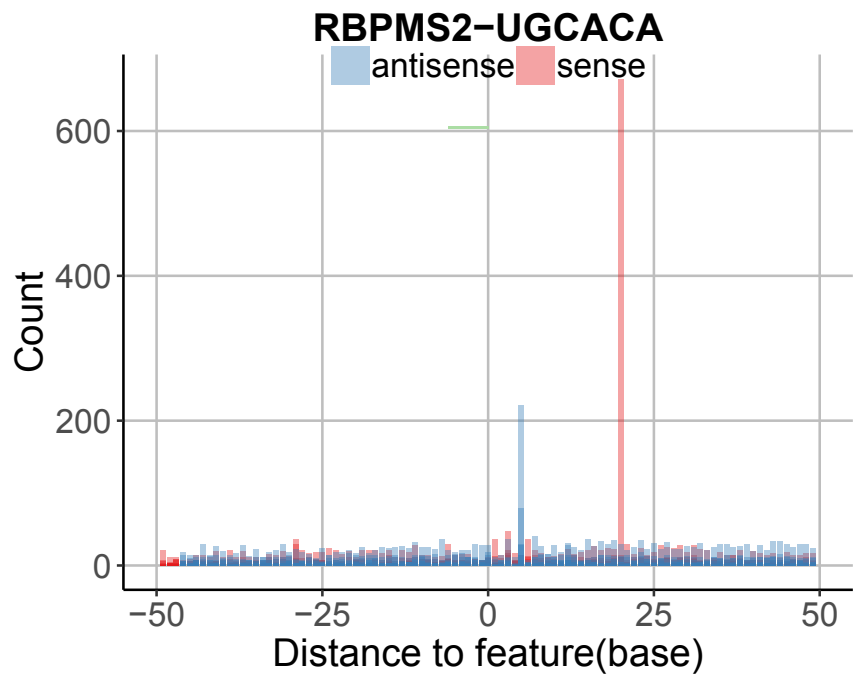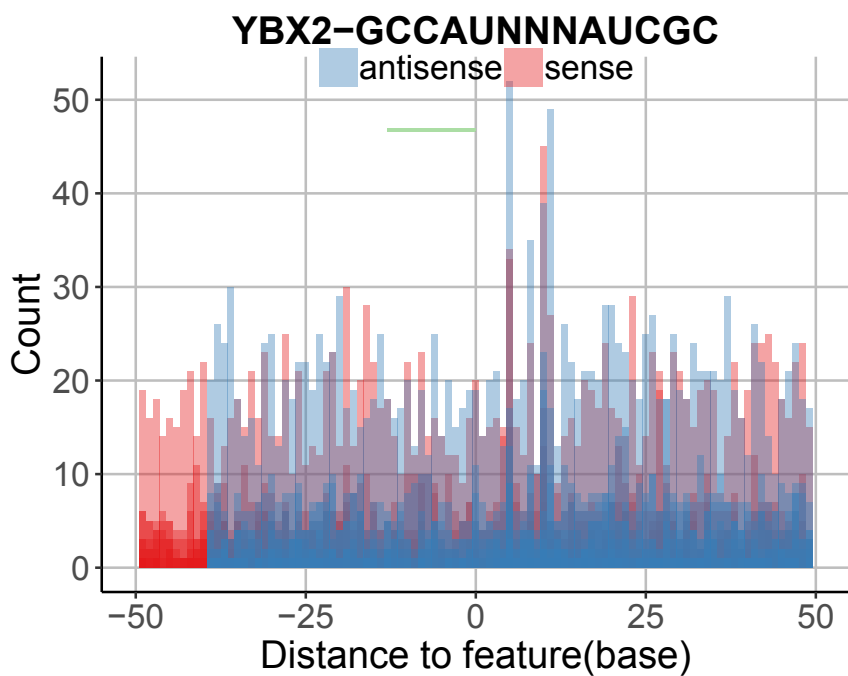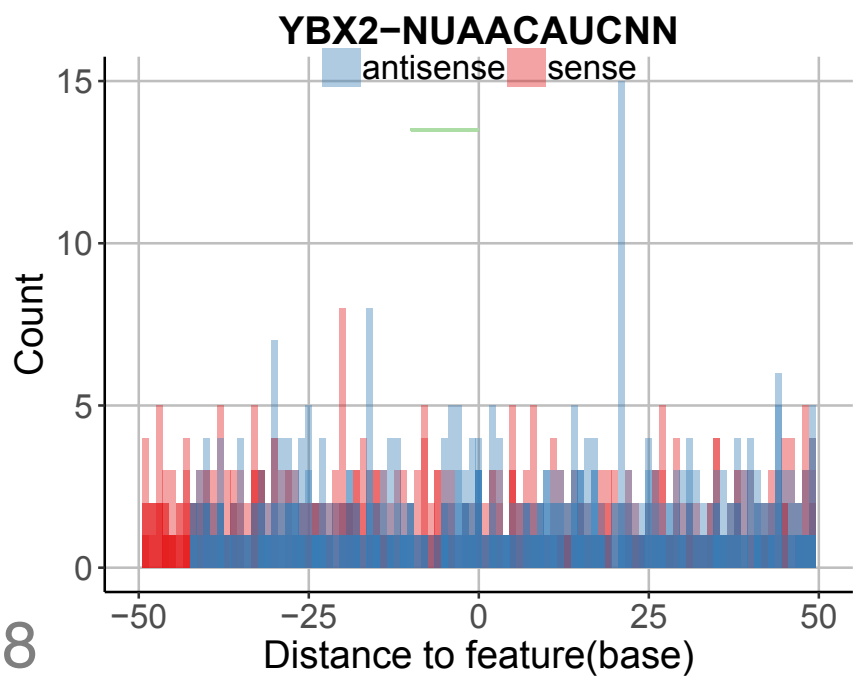

8

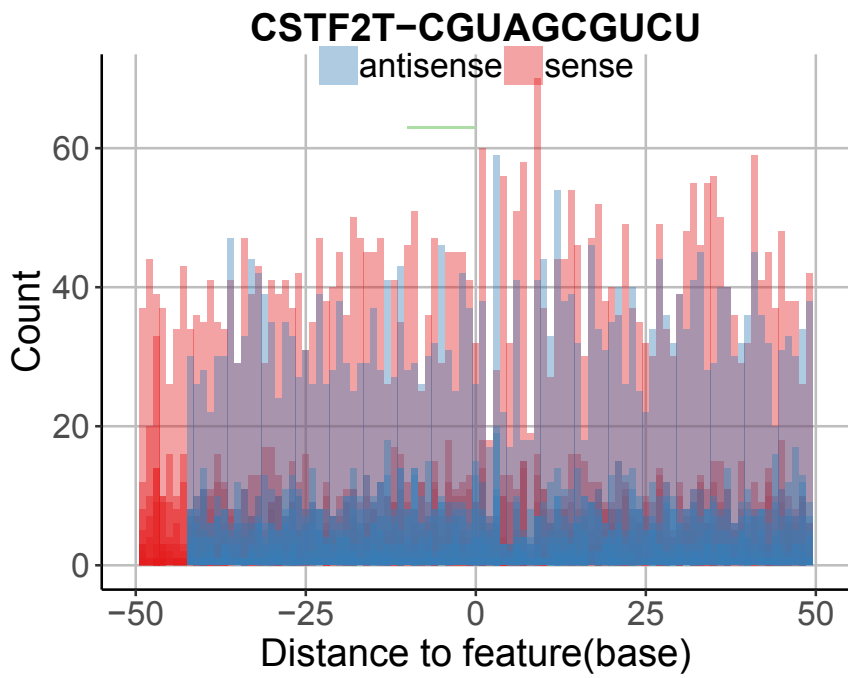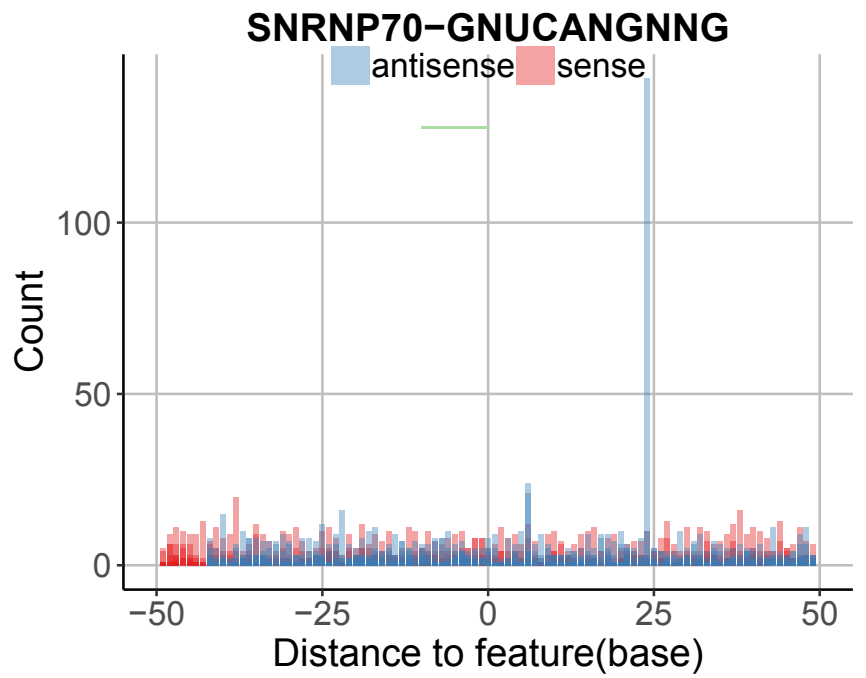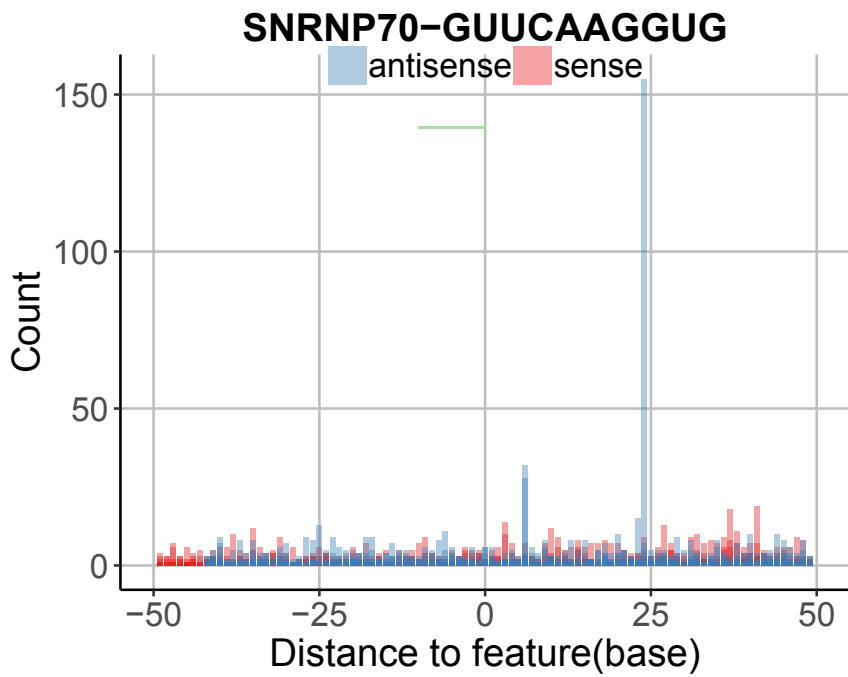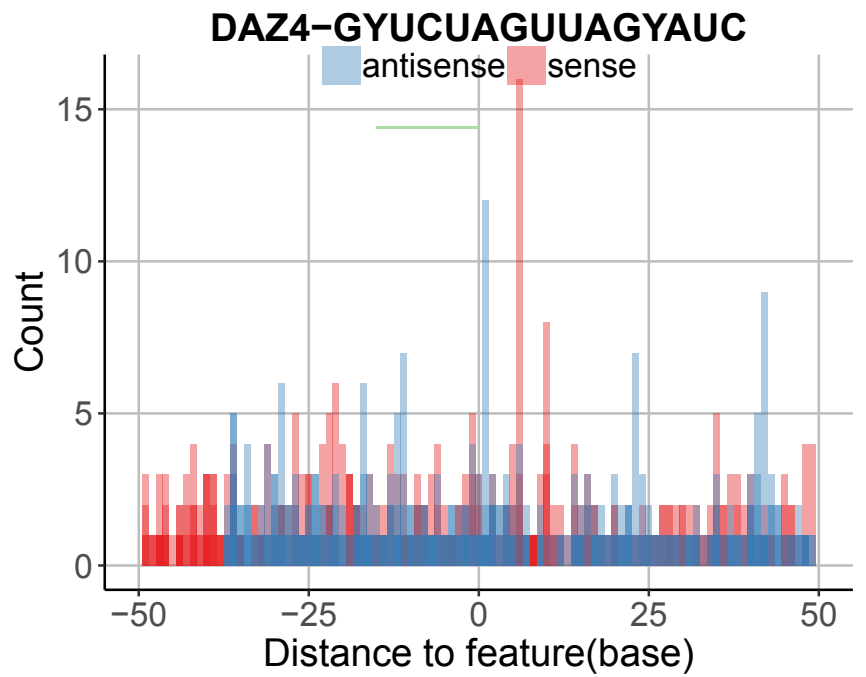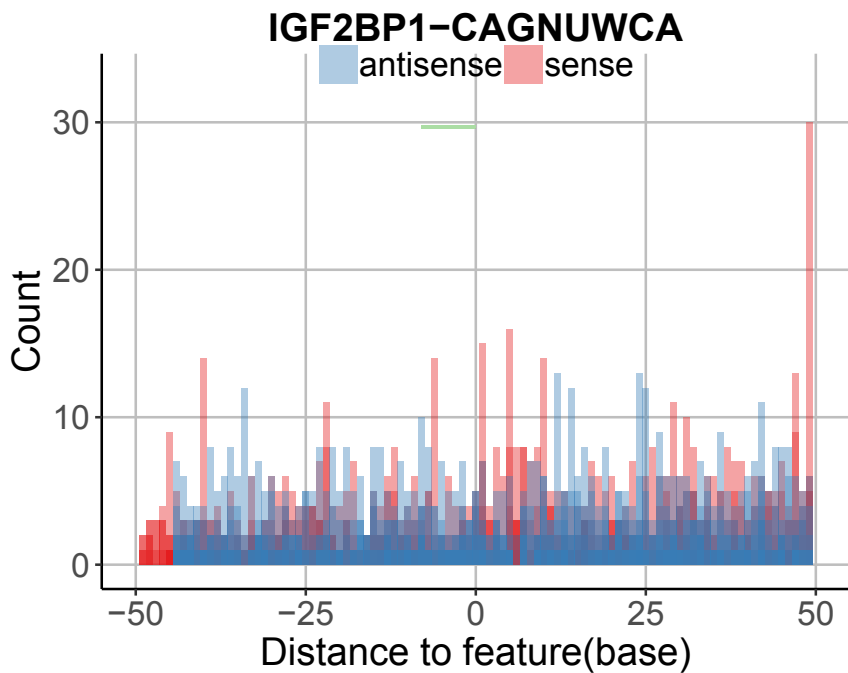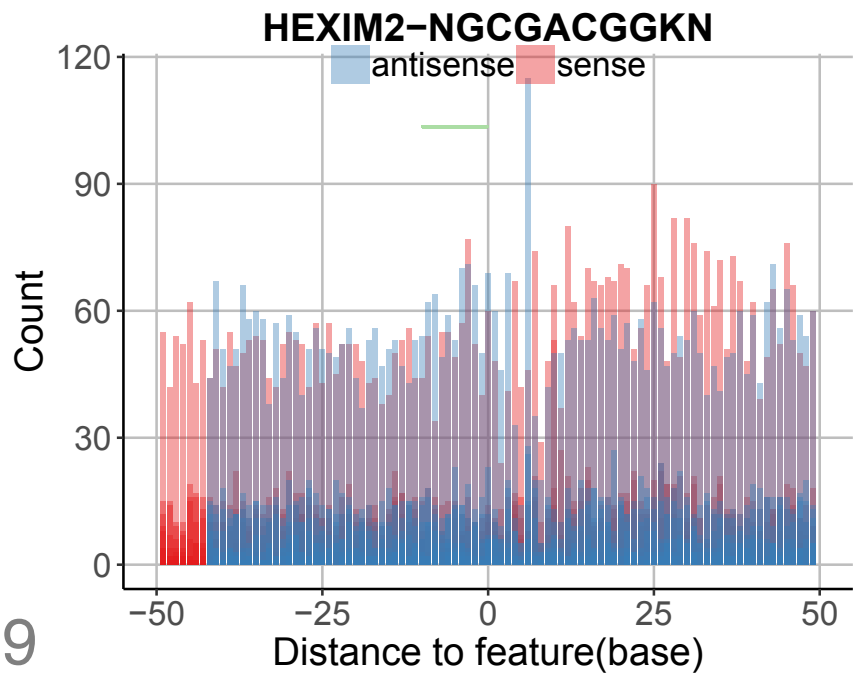

9

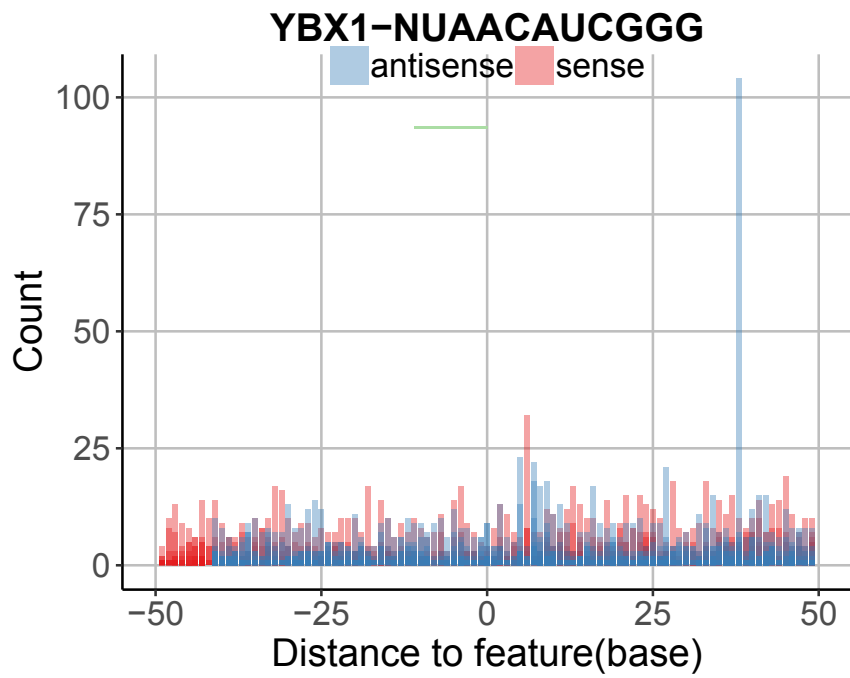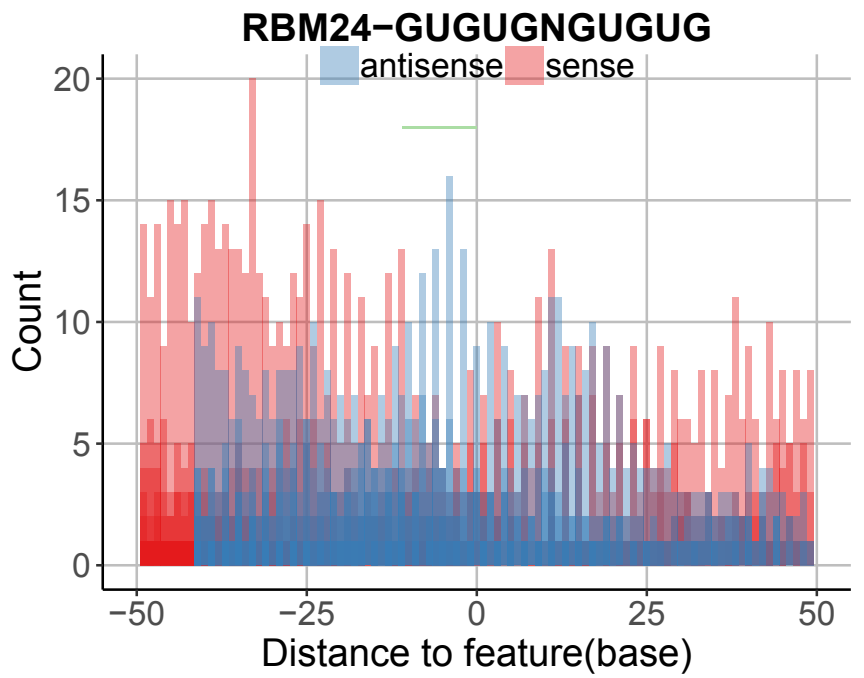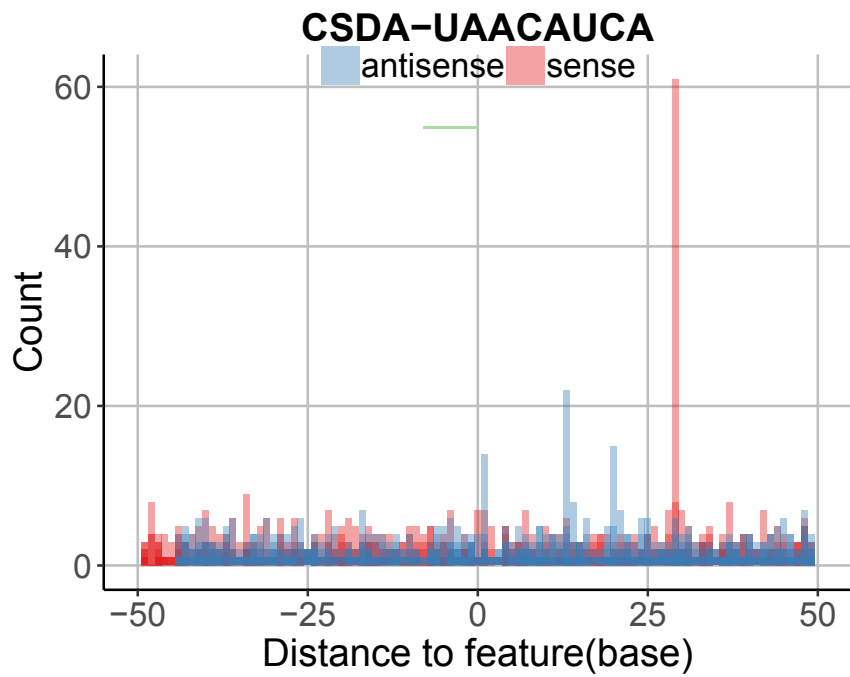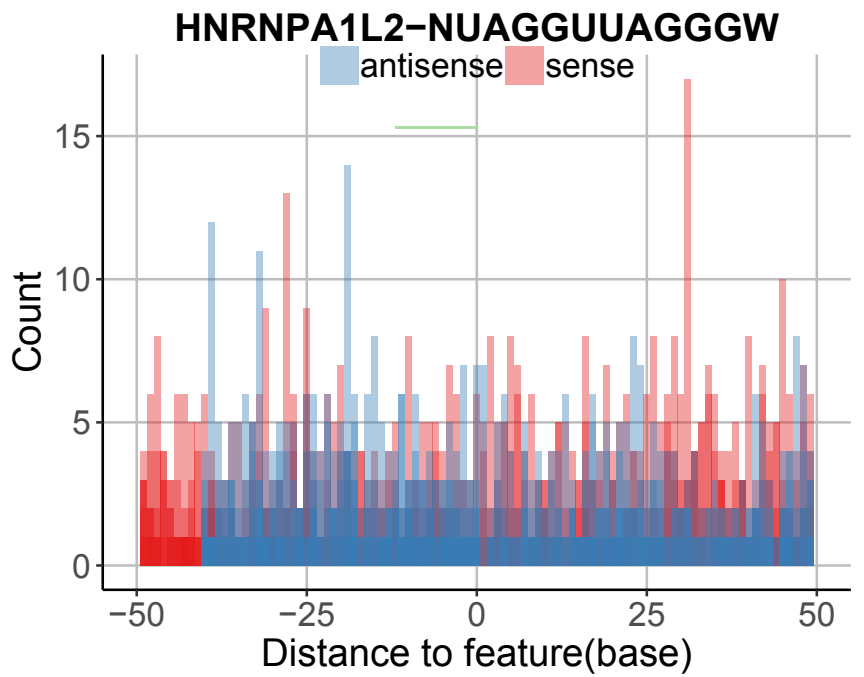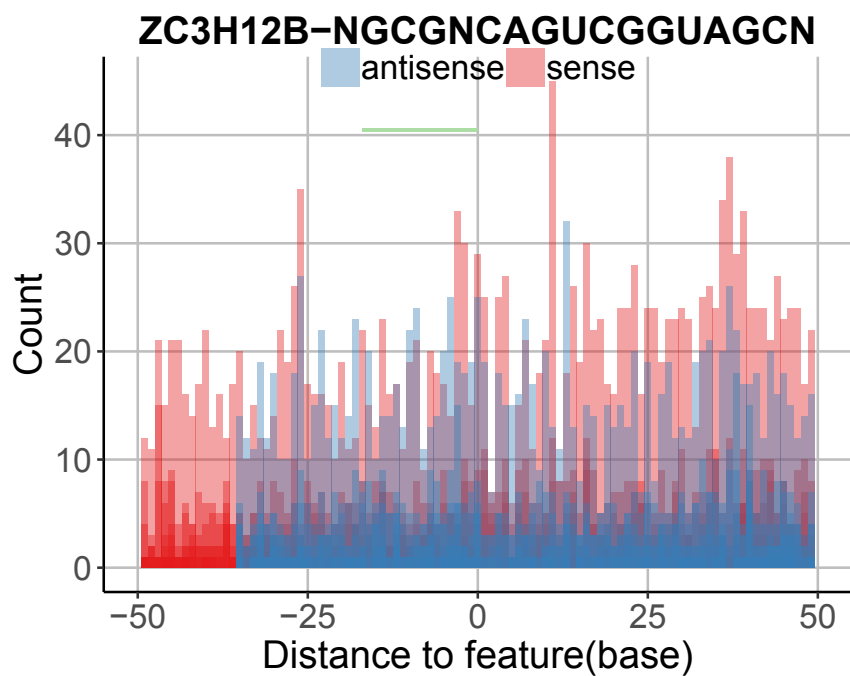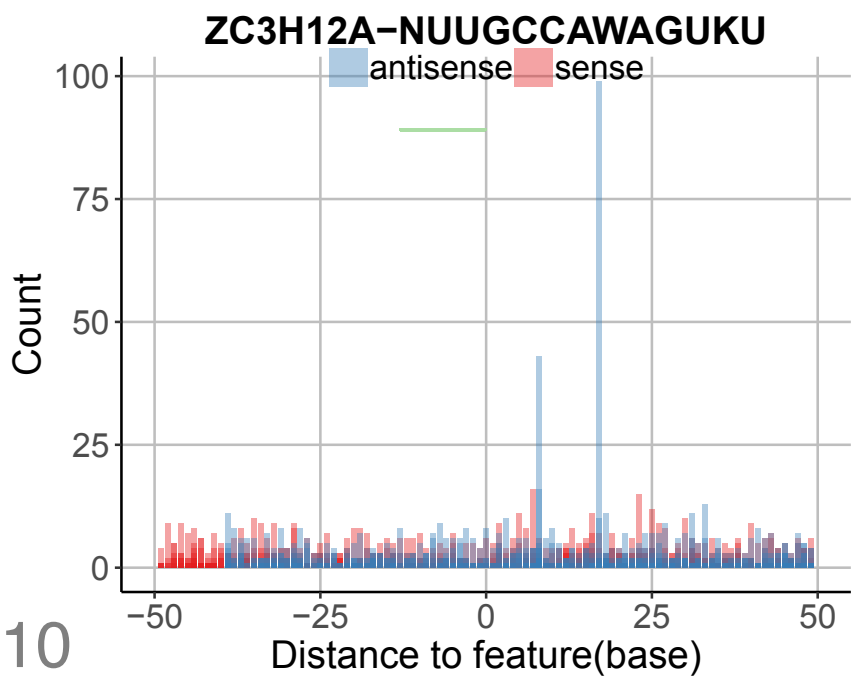

10

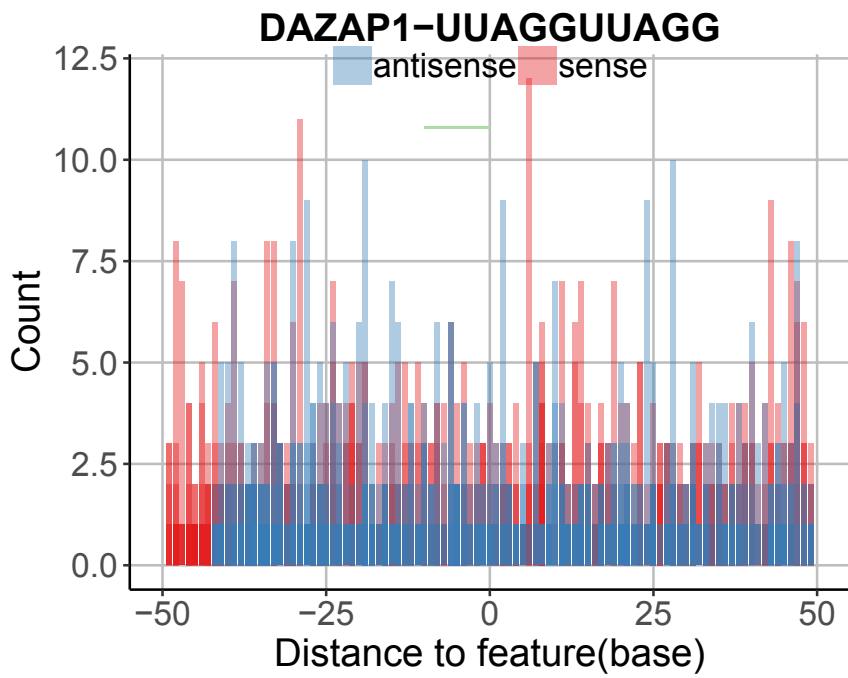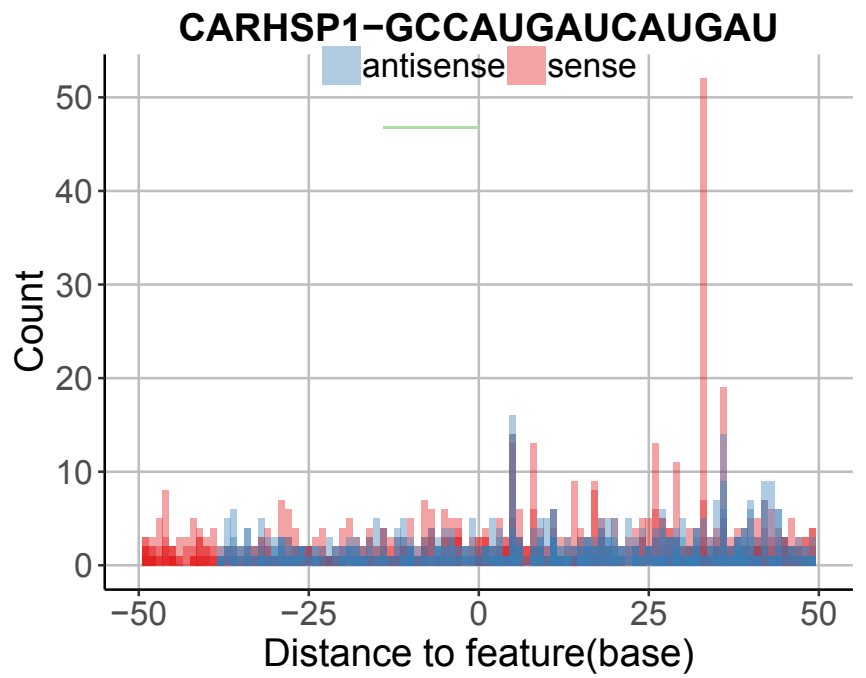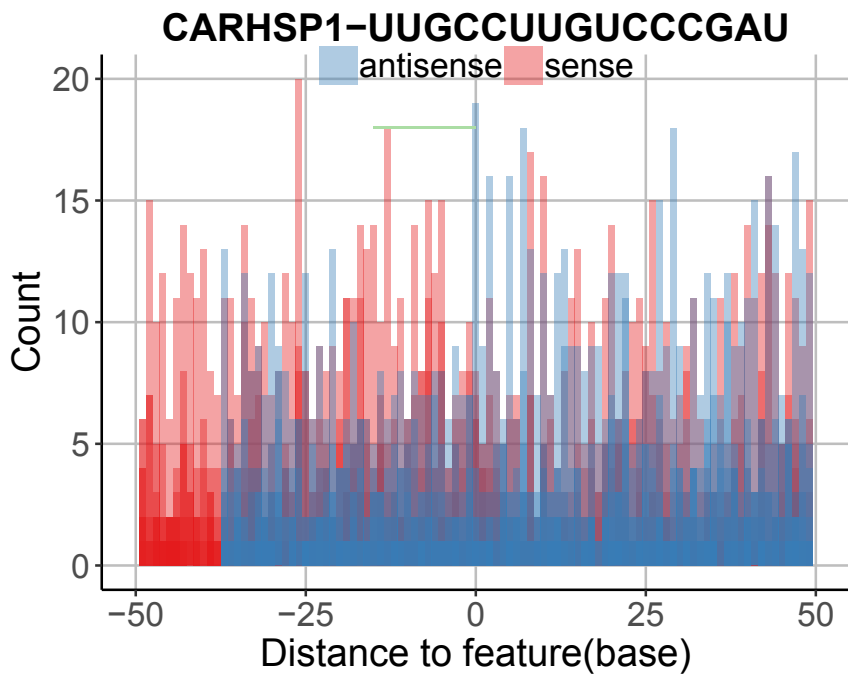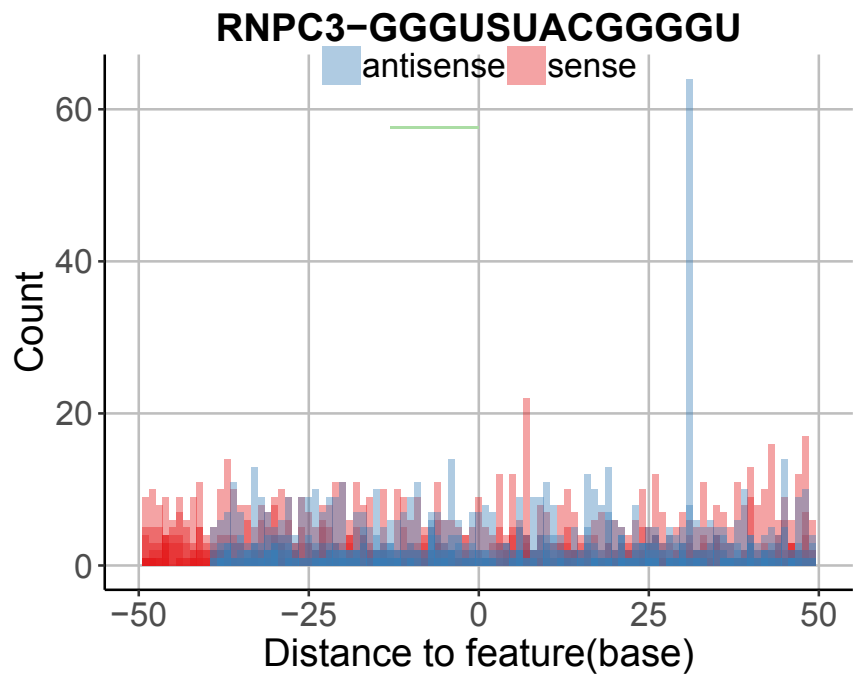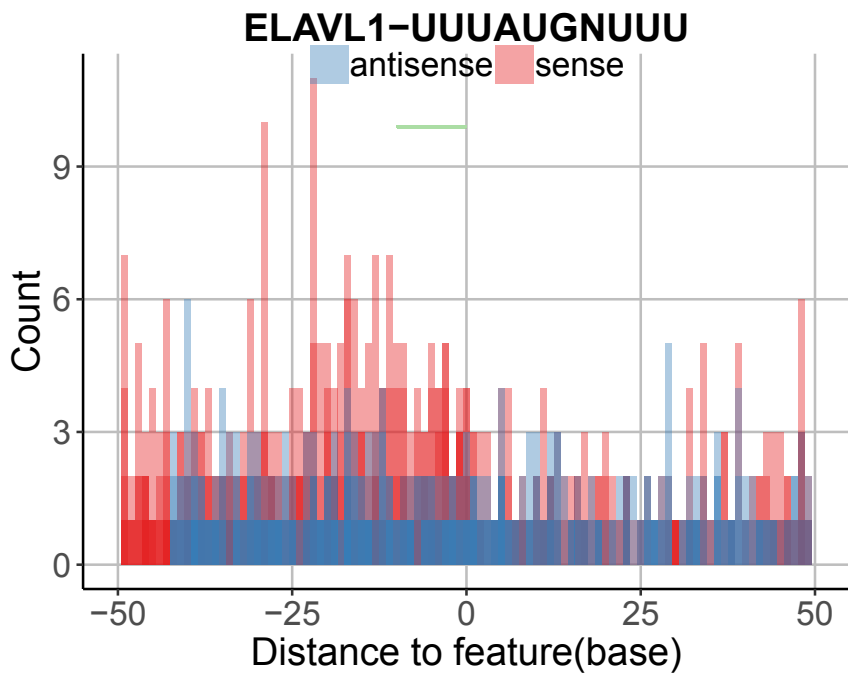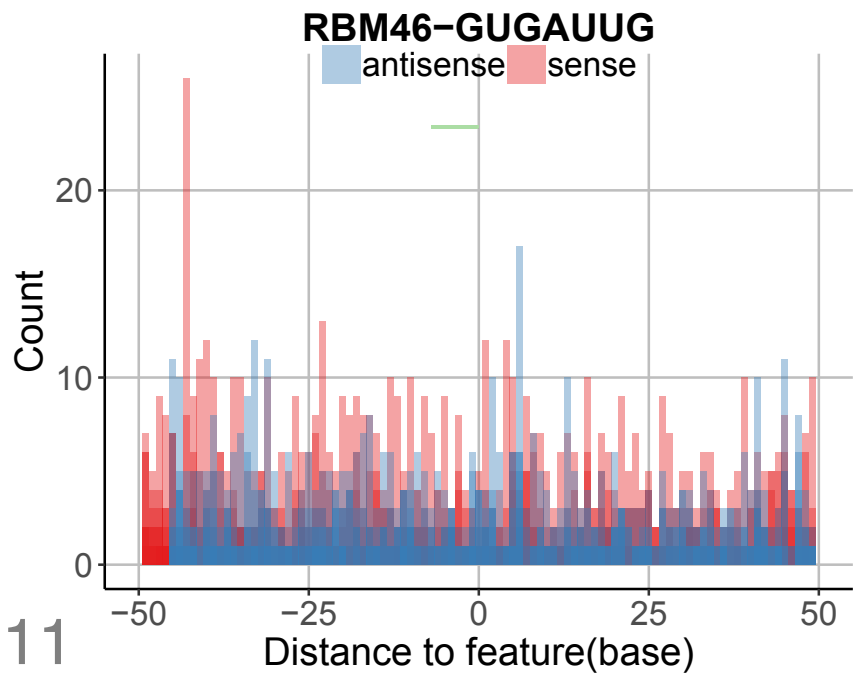

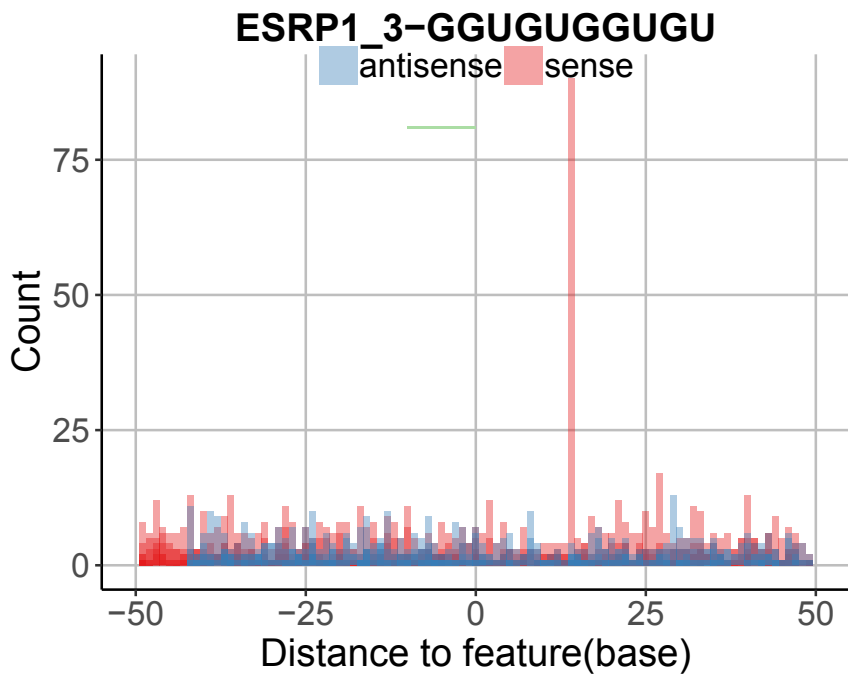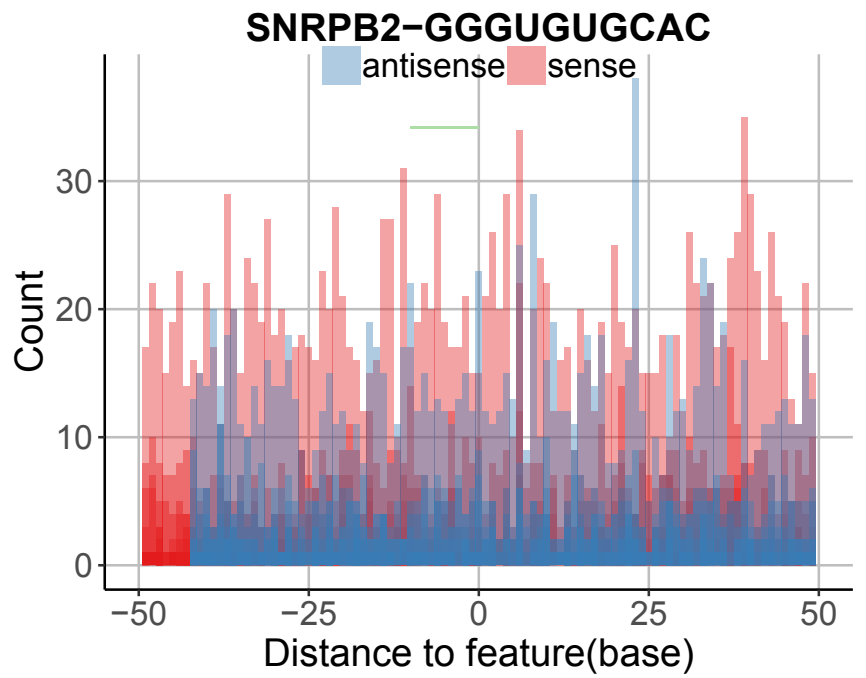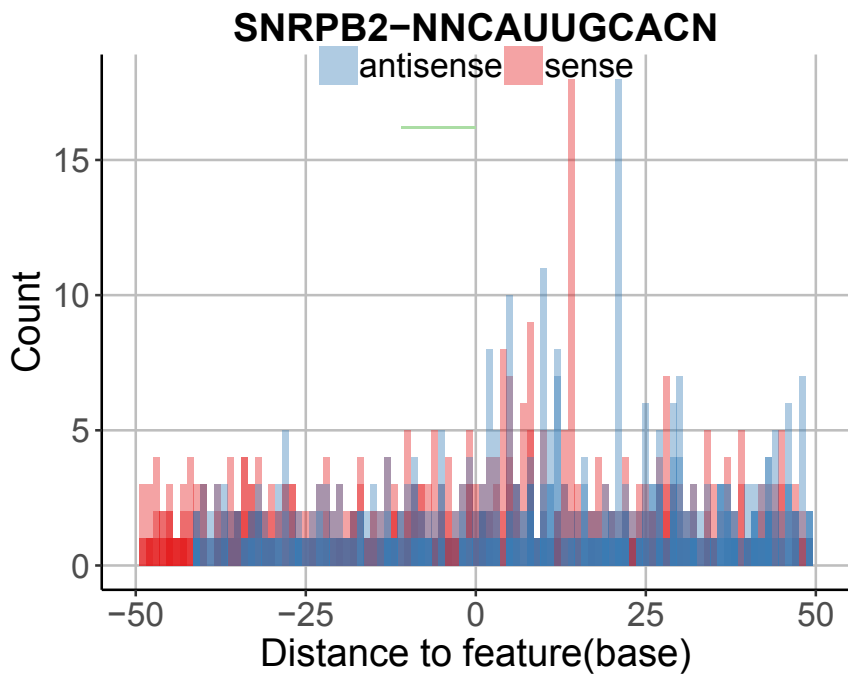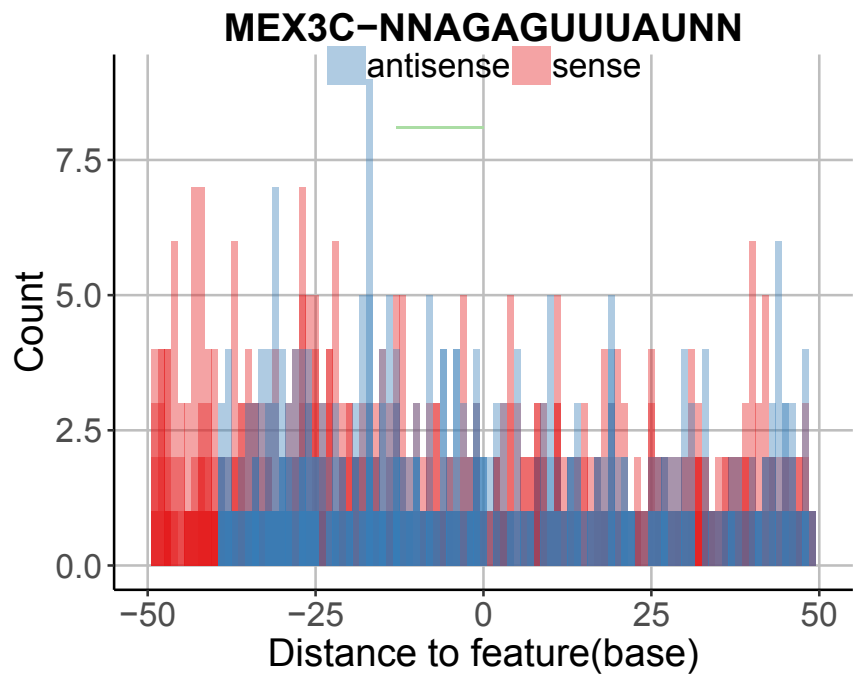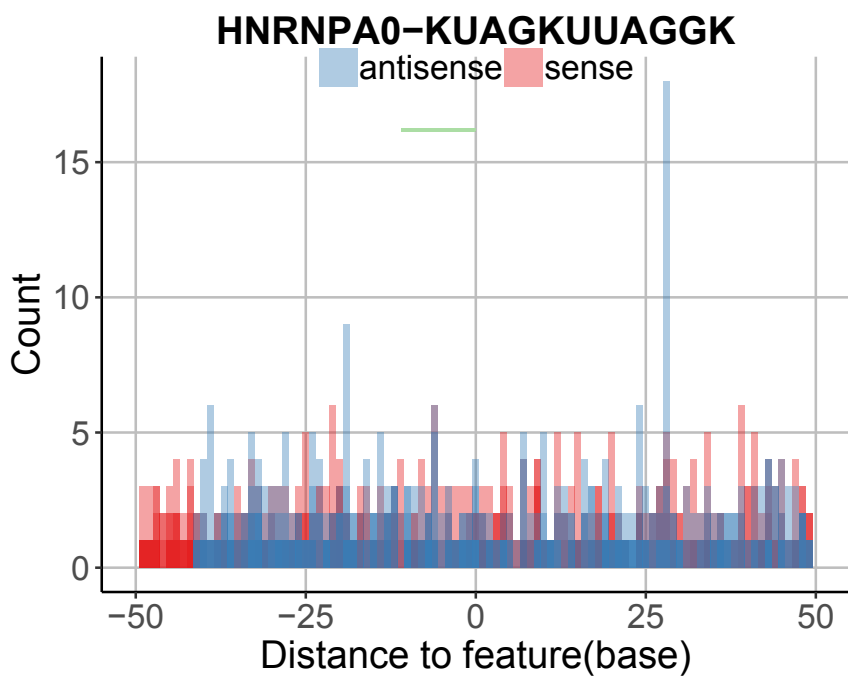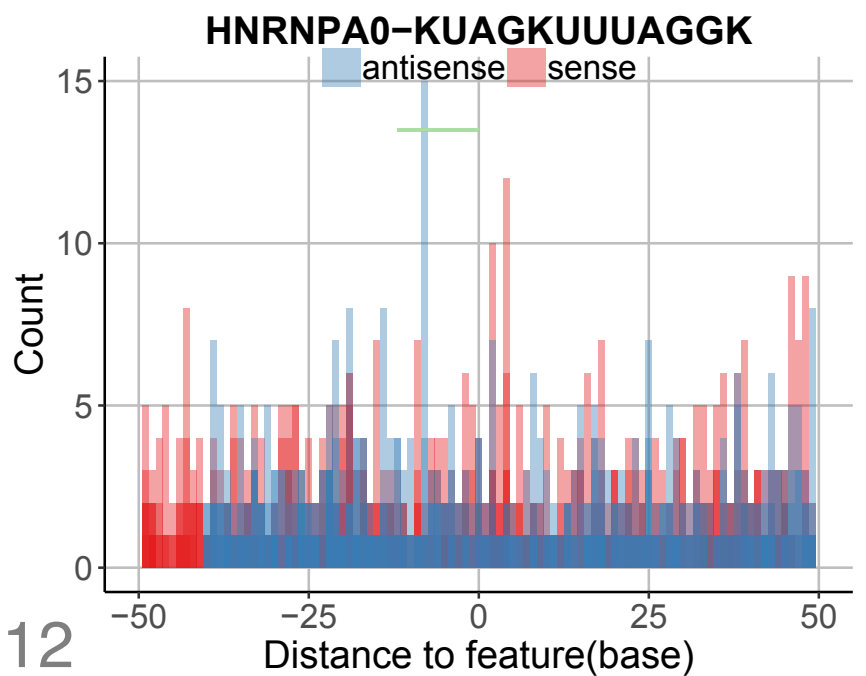

12

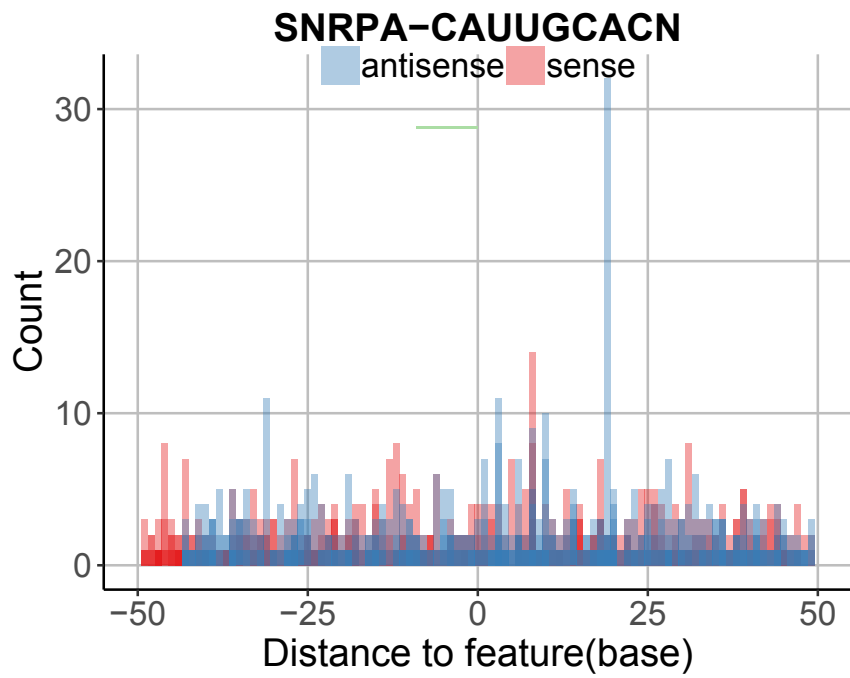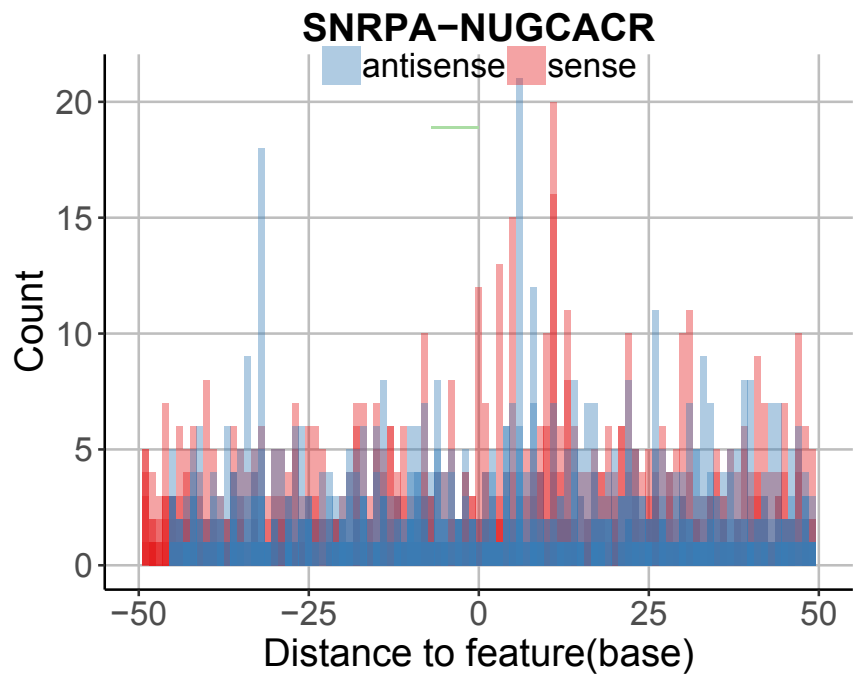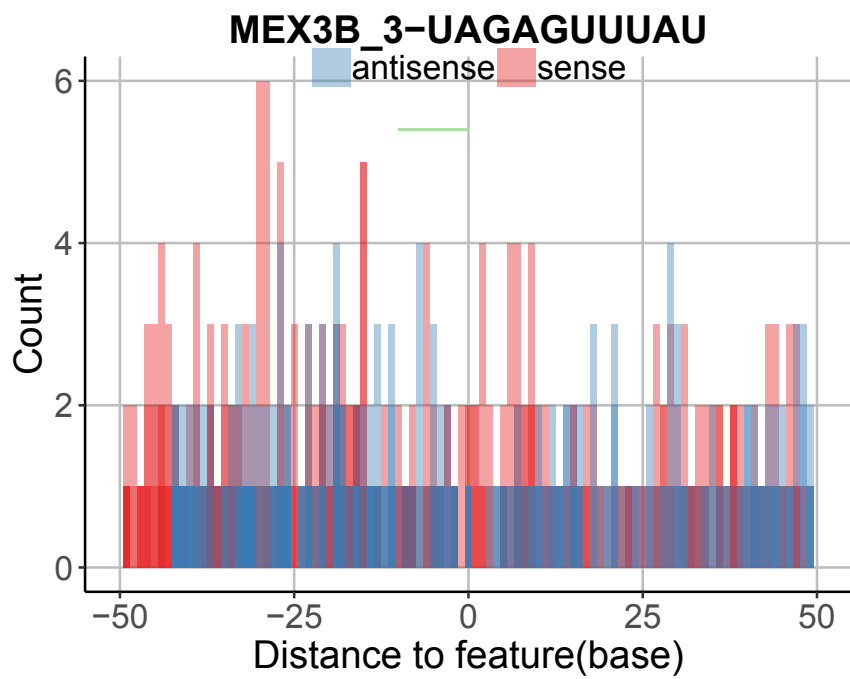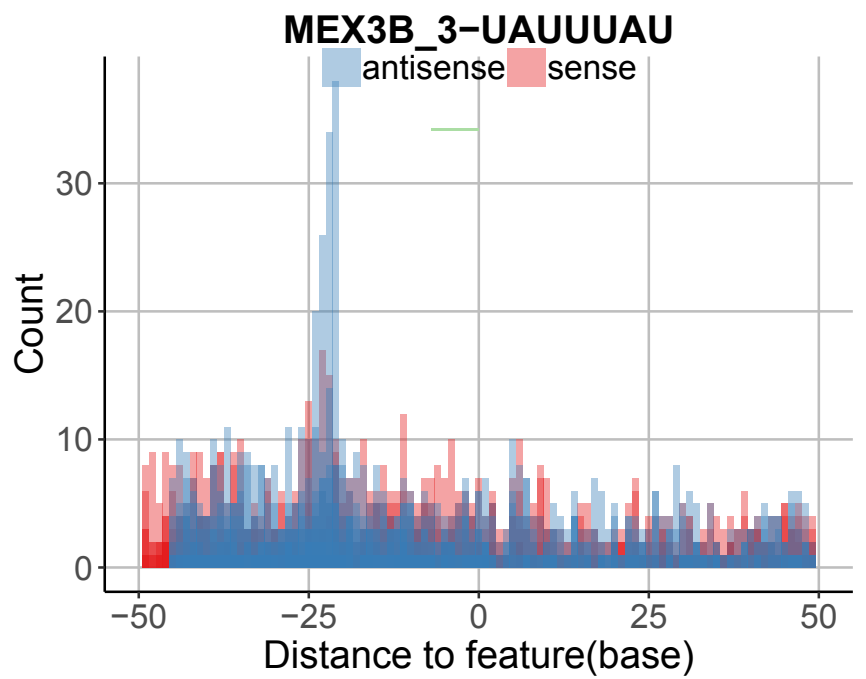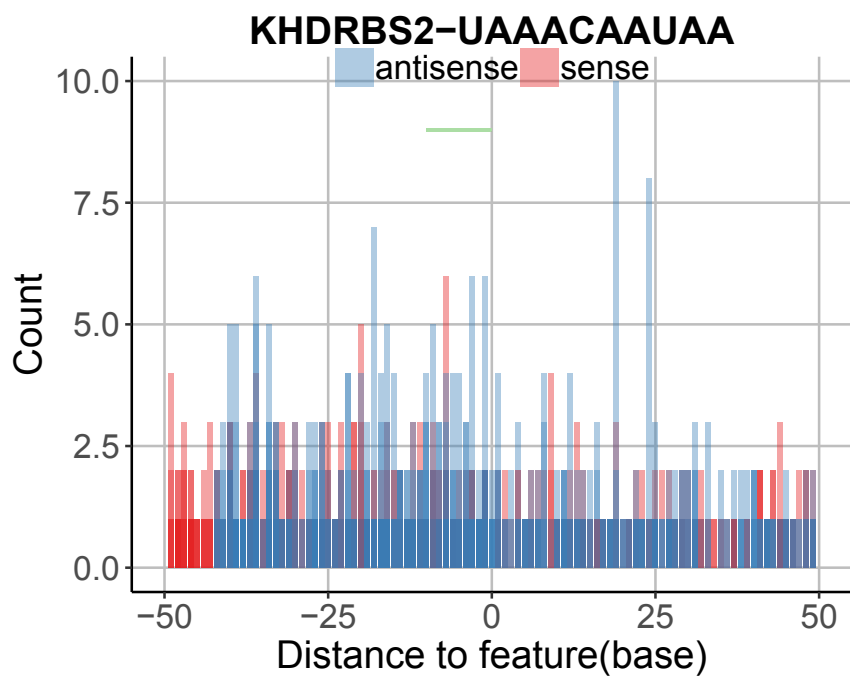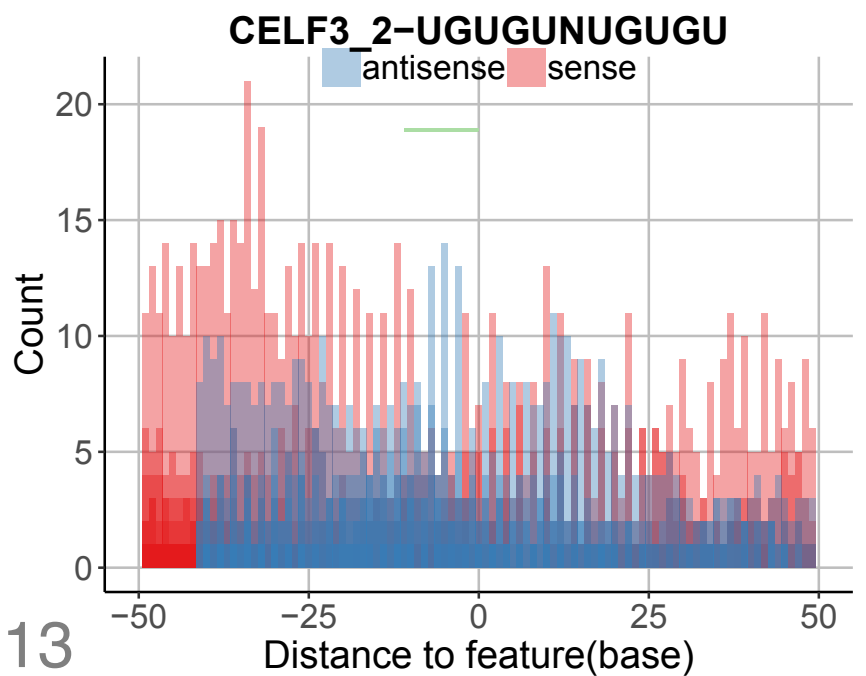

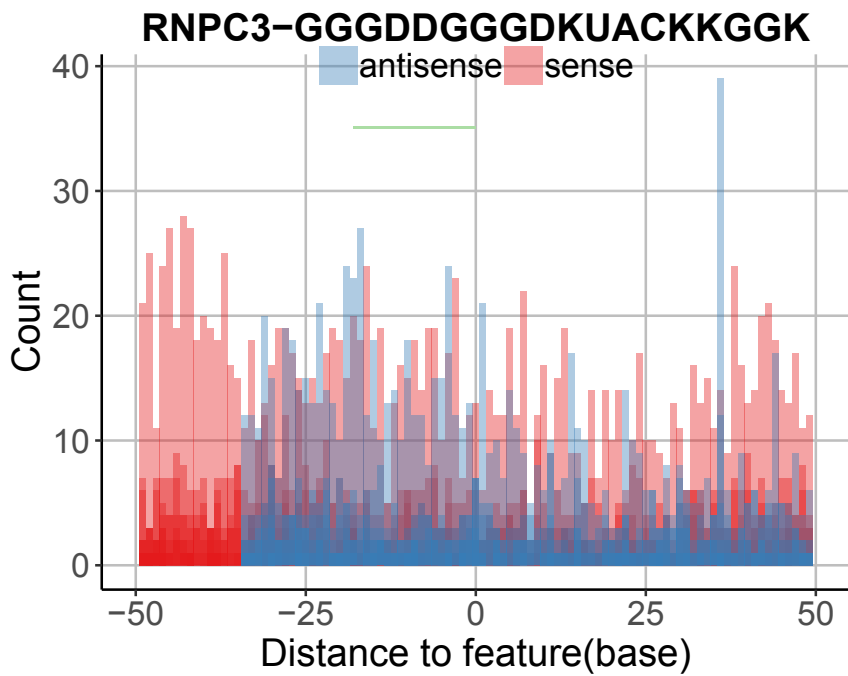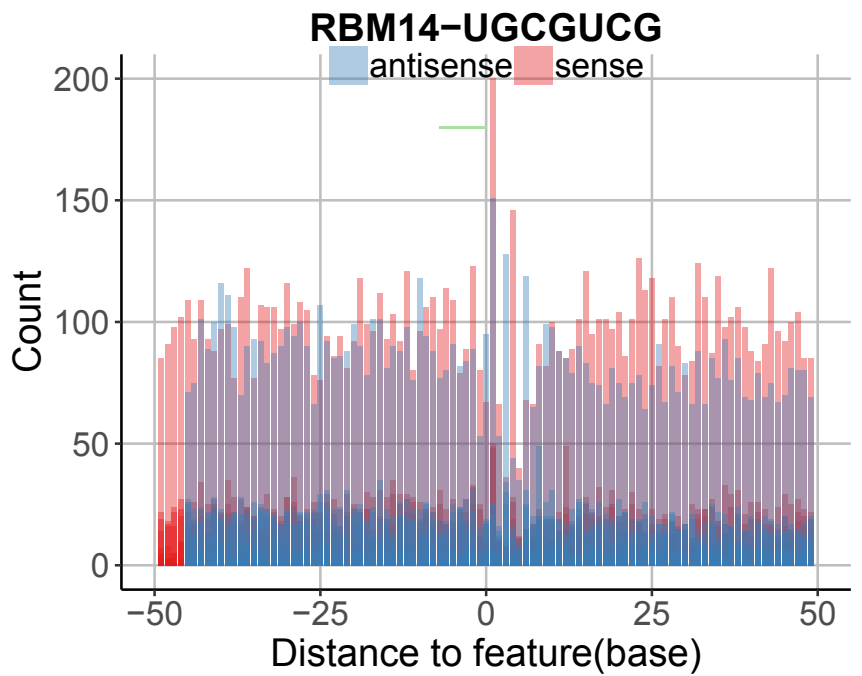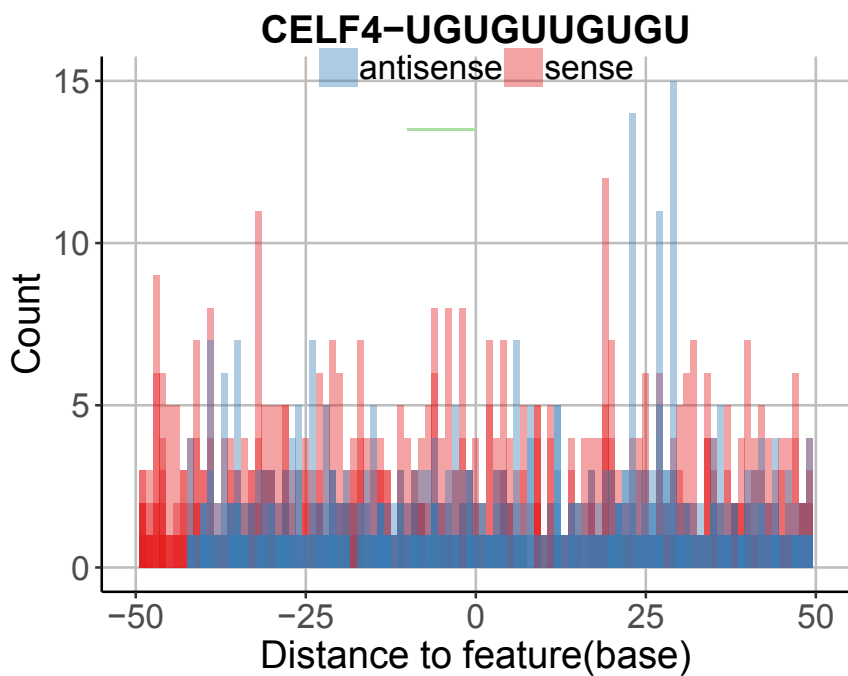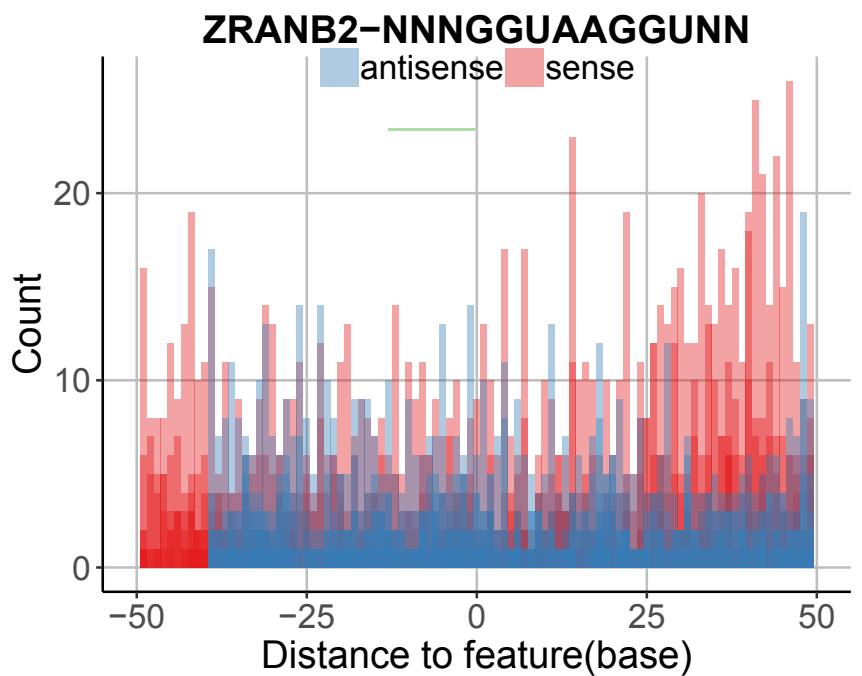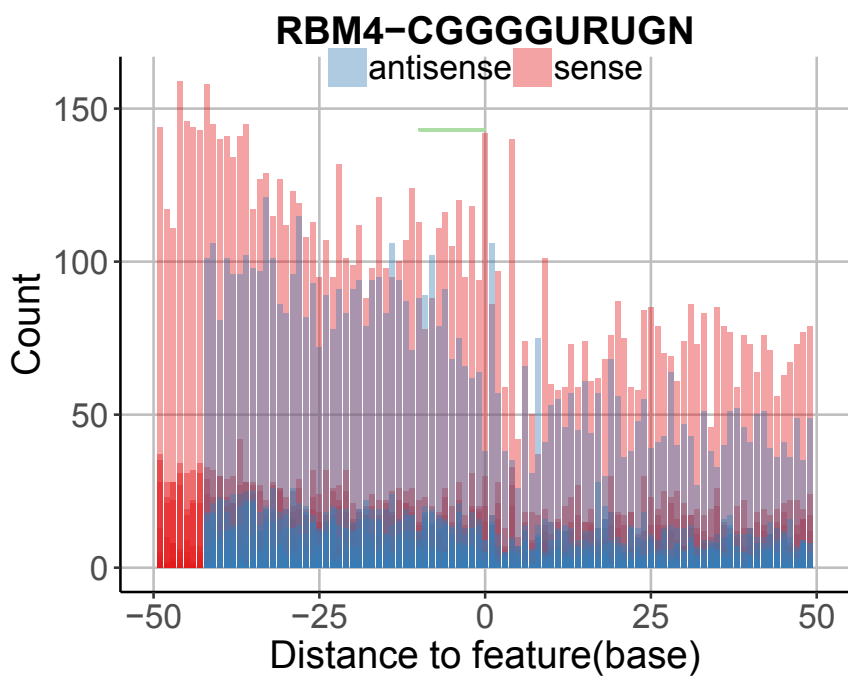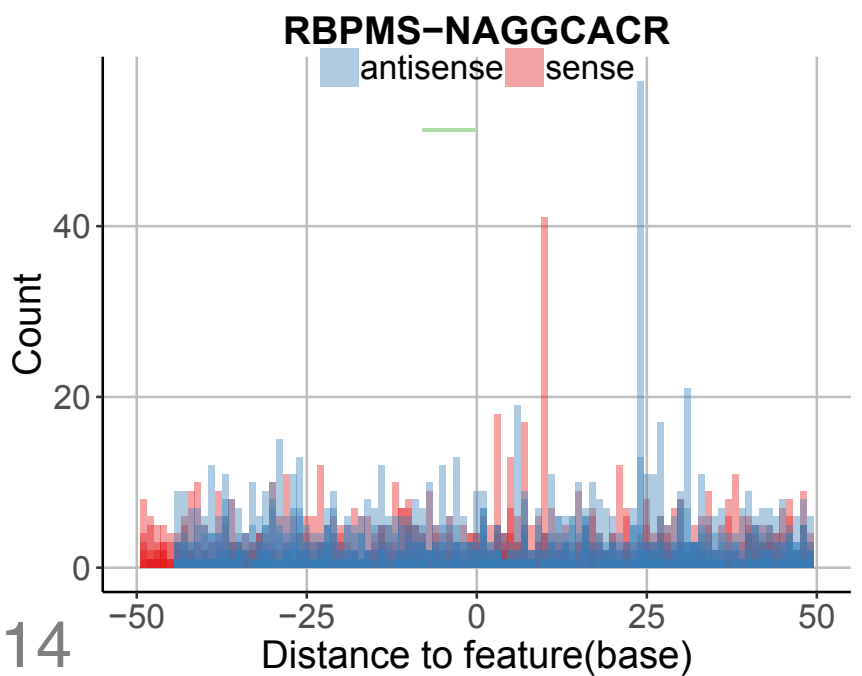

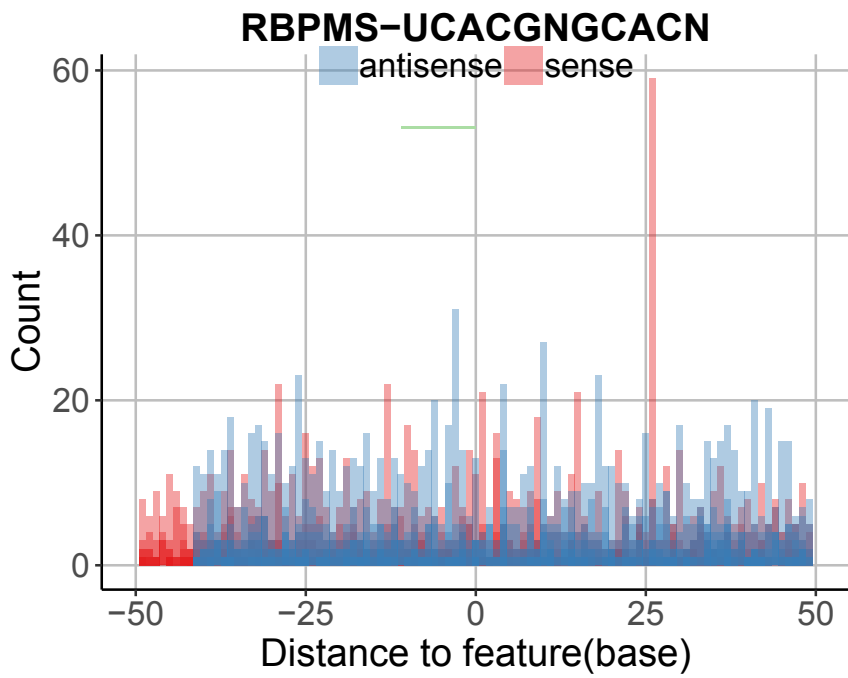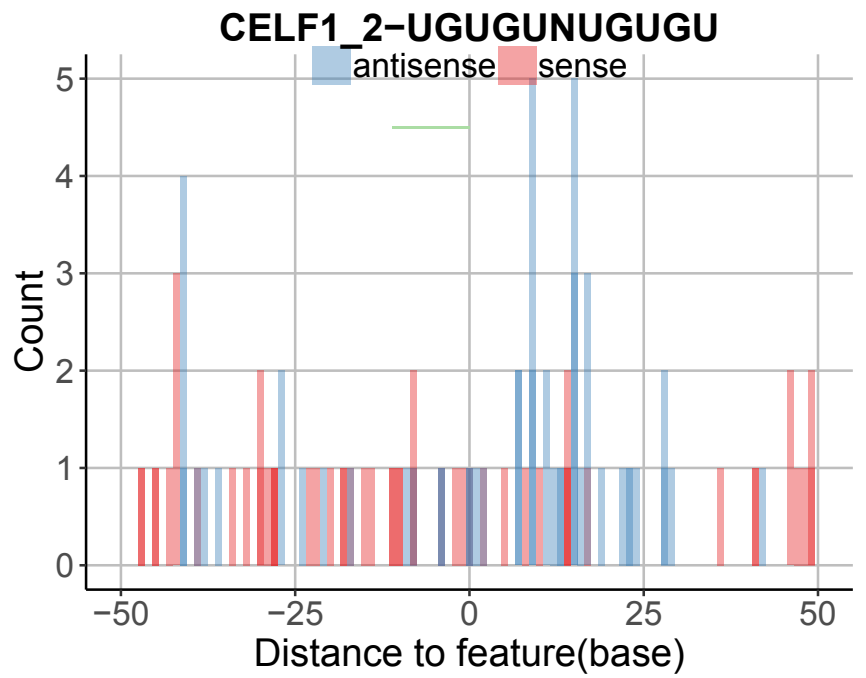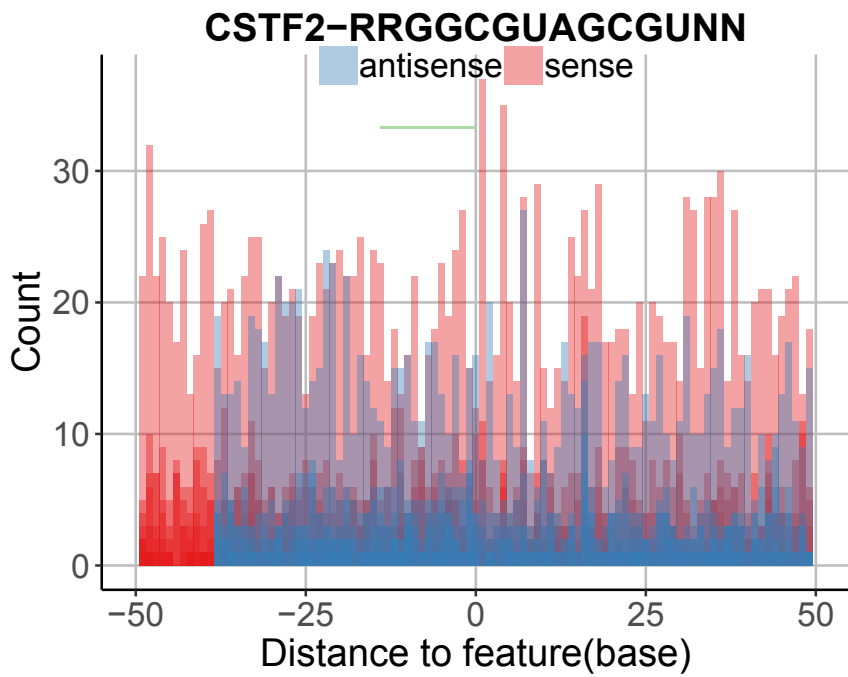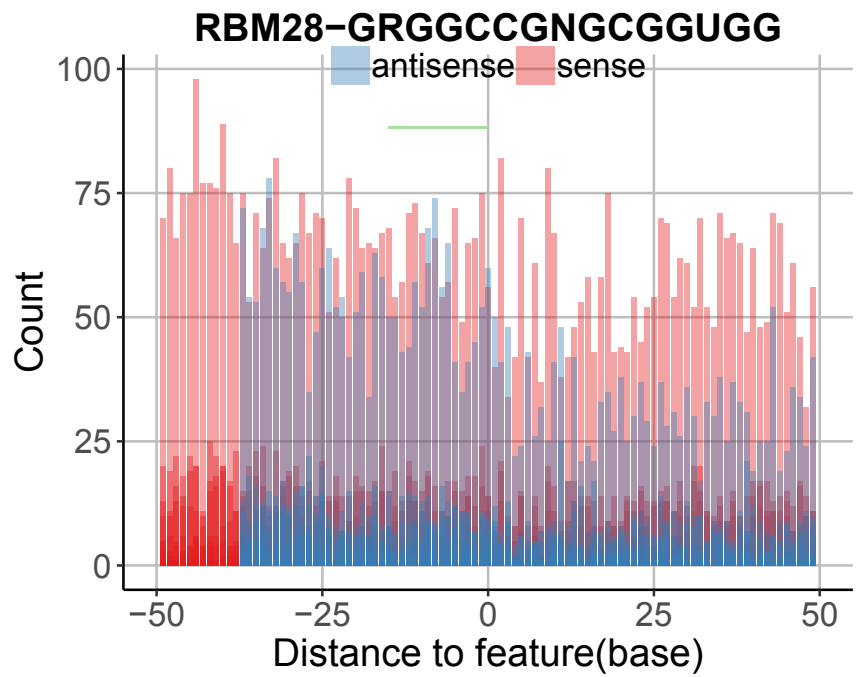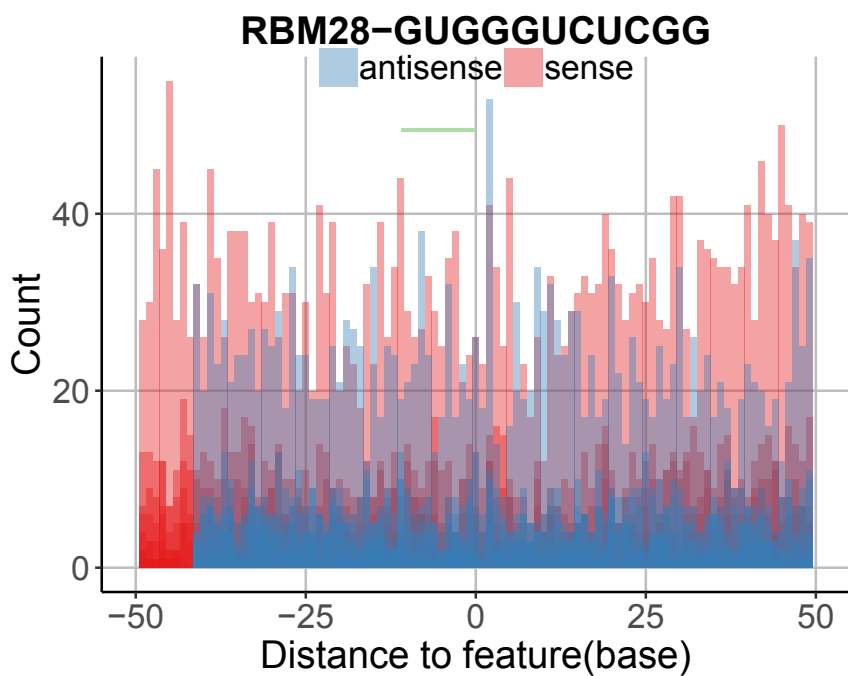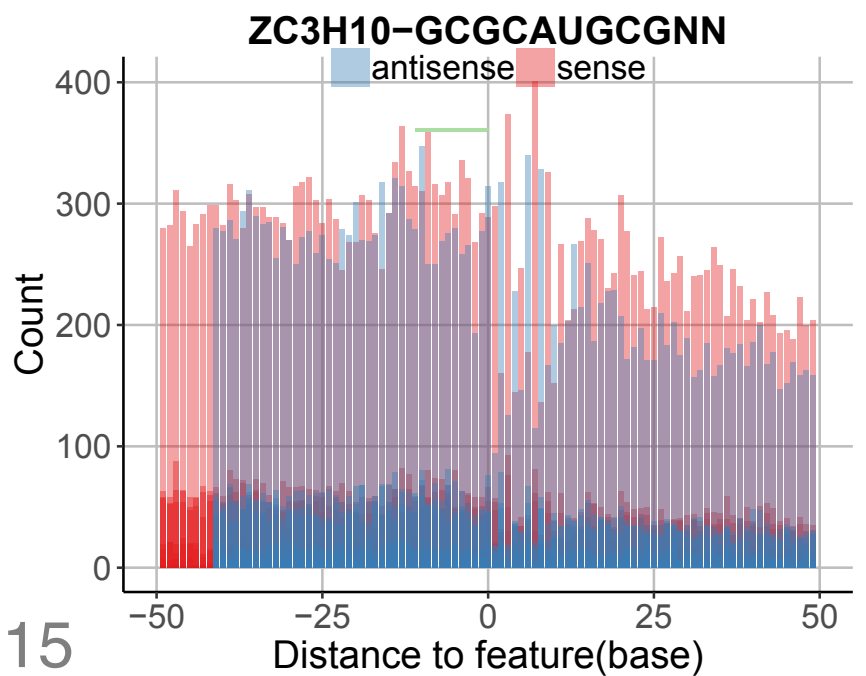



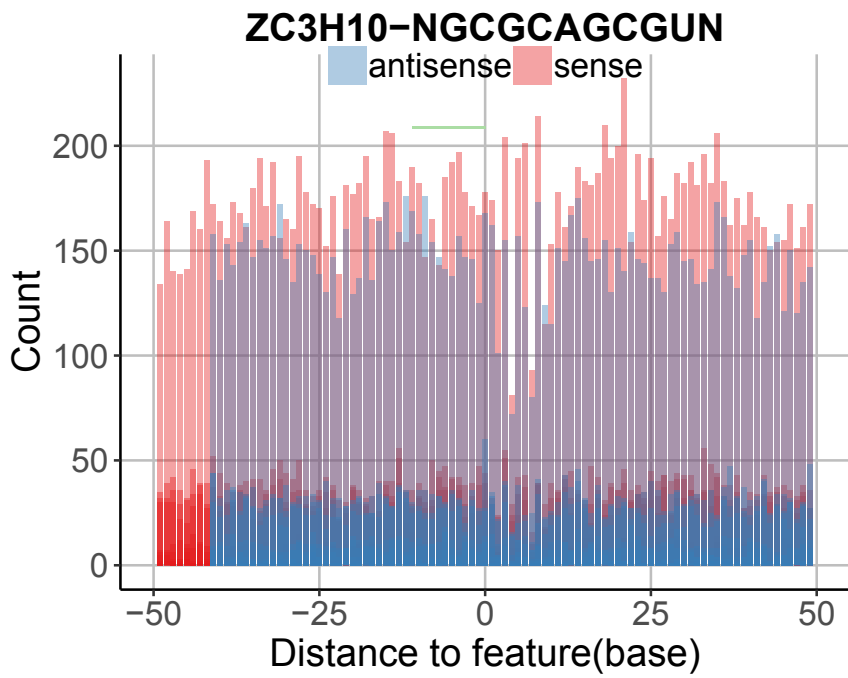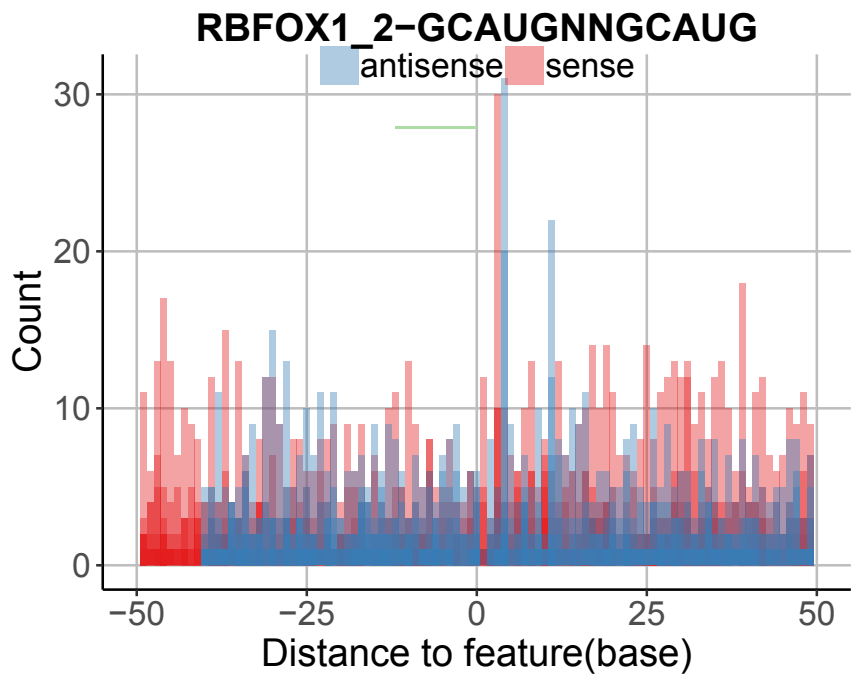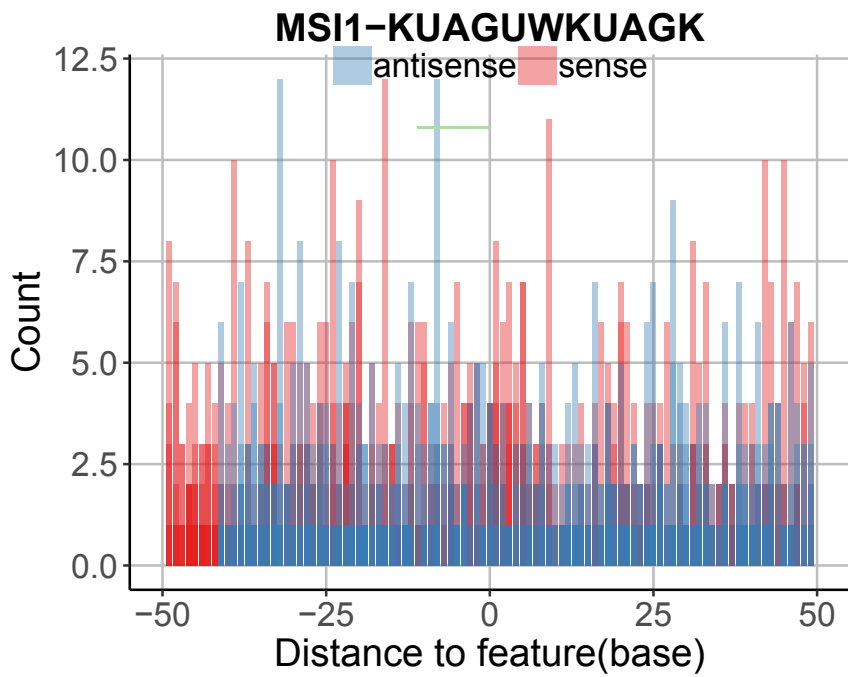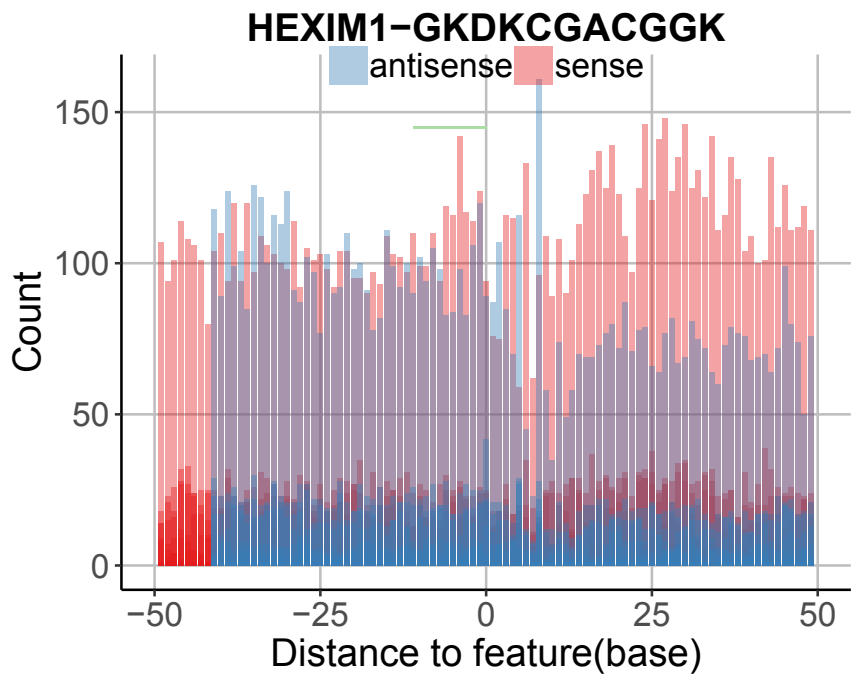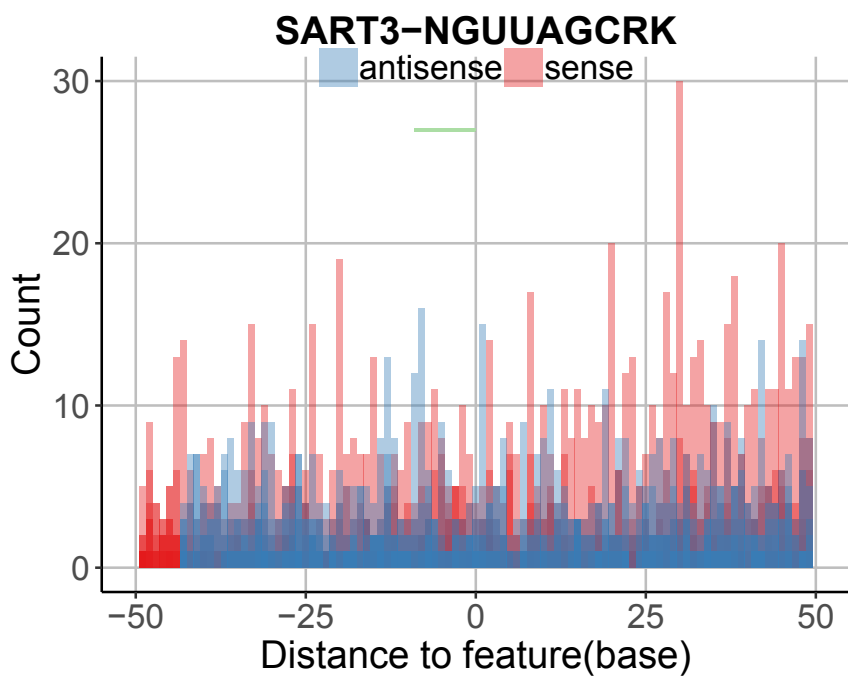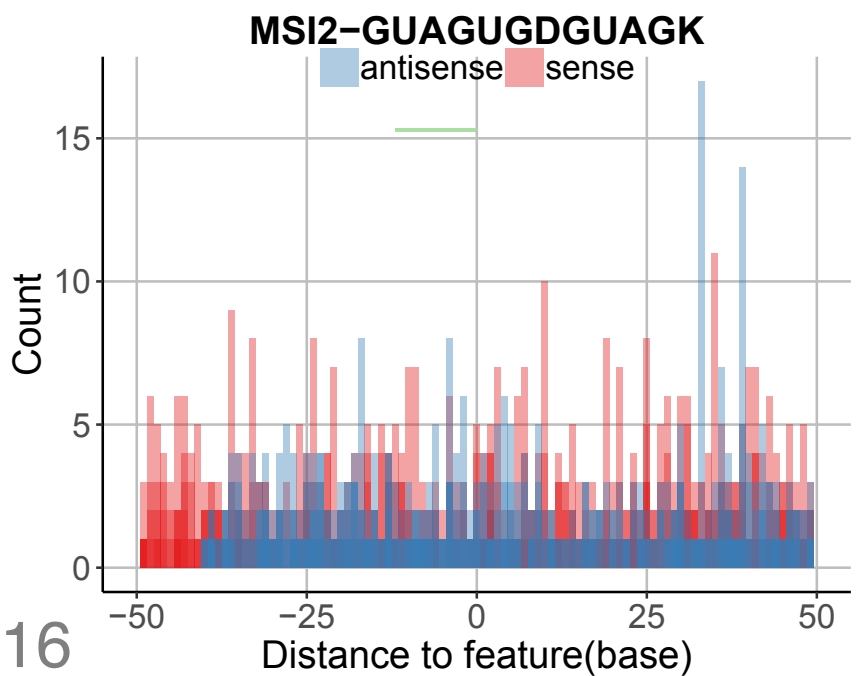

16

**MSI2-GUAGUNNGUAGK**

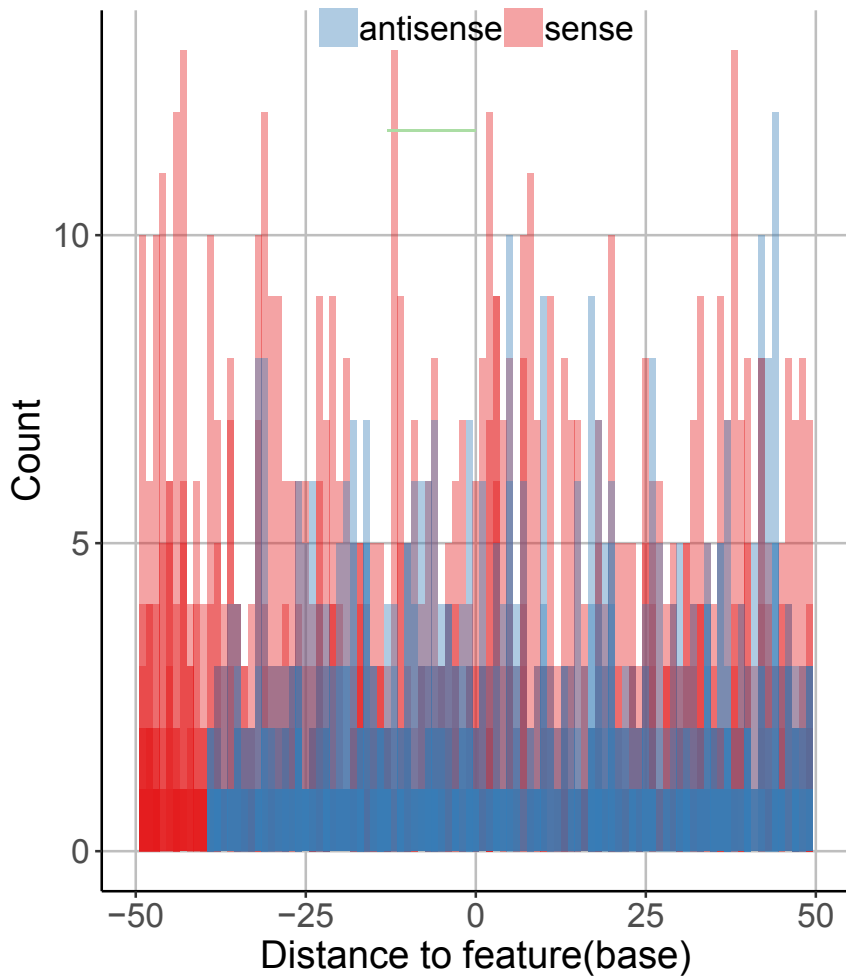

**ZCRB1-GNNUUAAKK**

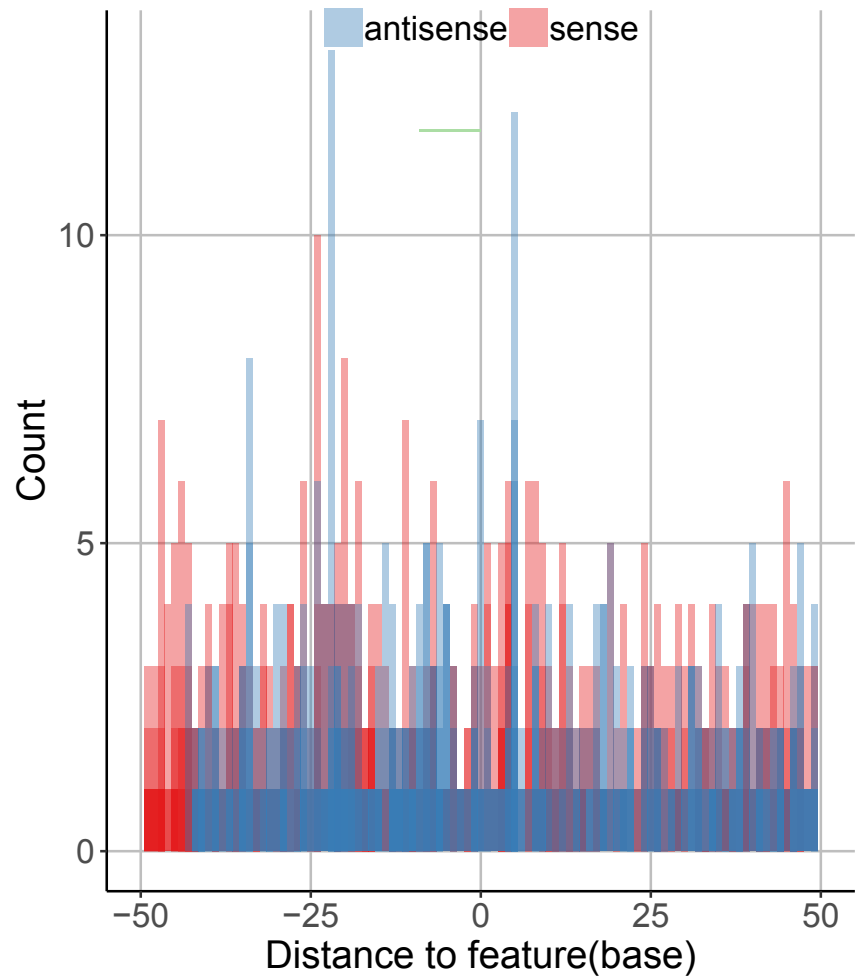

**ZCRB1-GUGGACUUA**

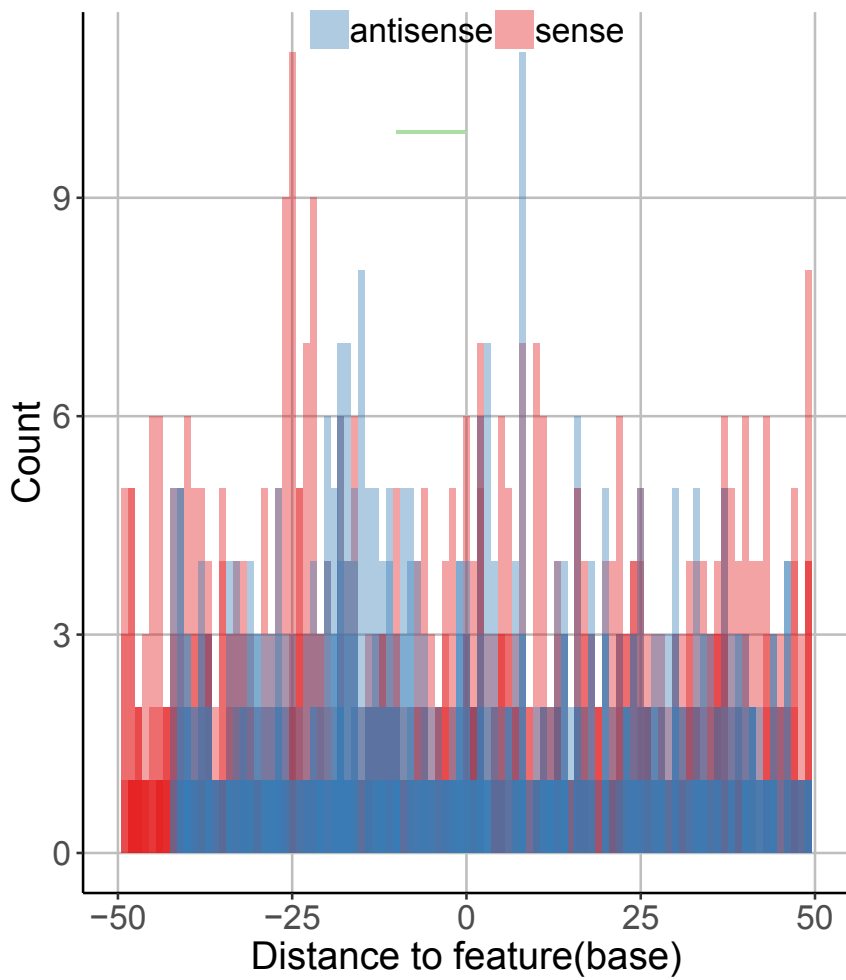

**LARP6-GUGUCNNNNNNNNNGAAGUCN**

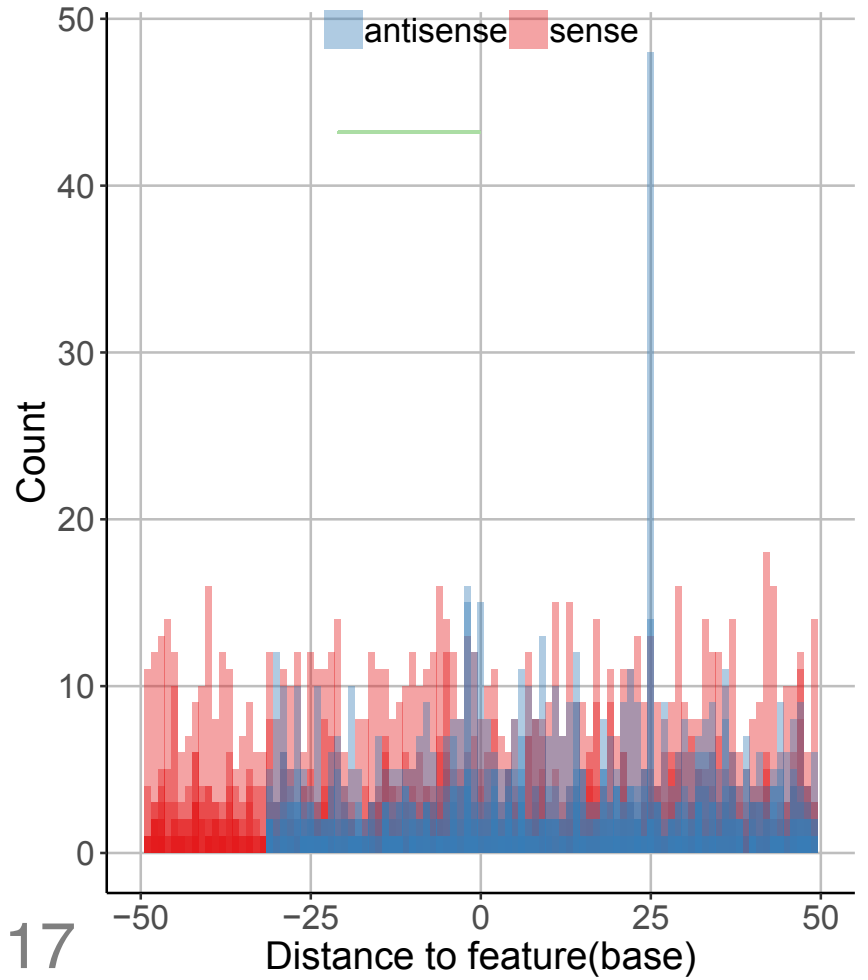

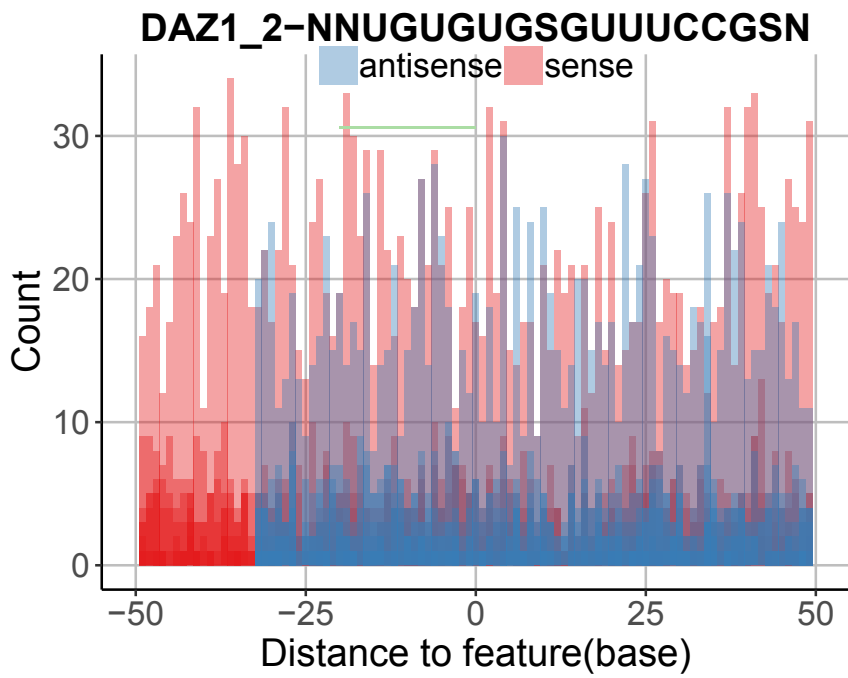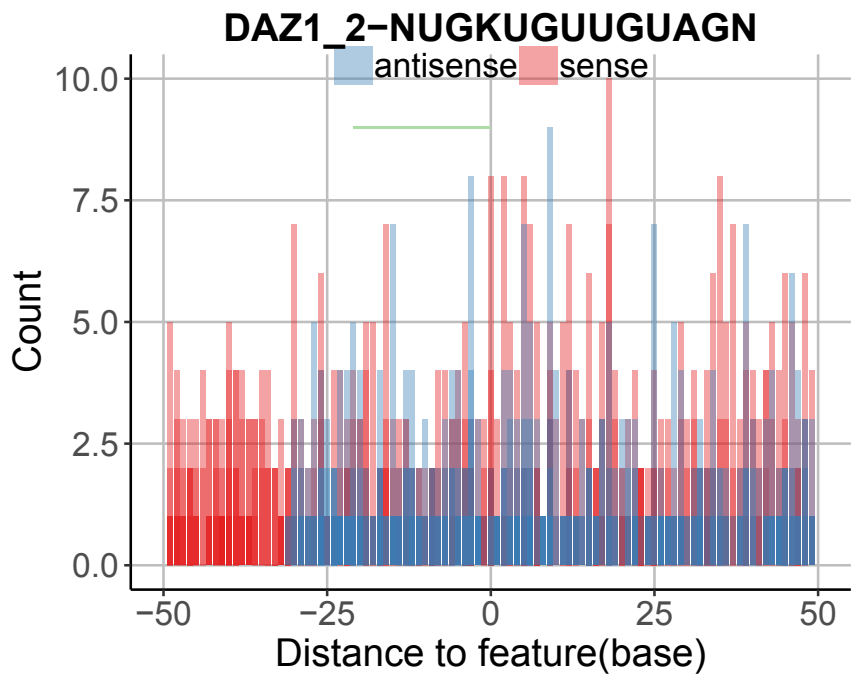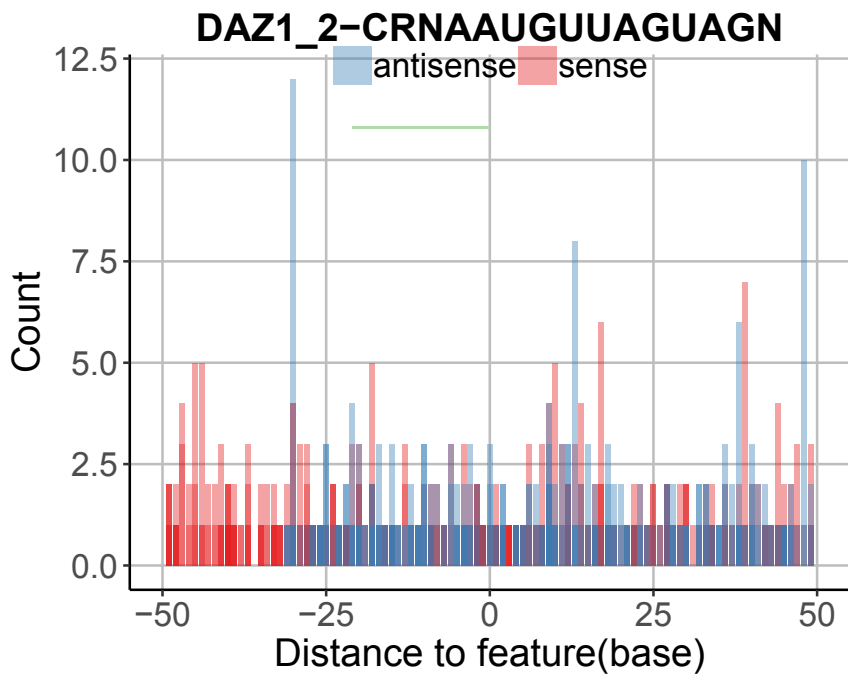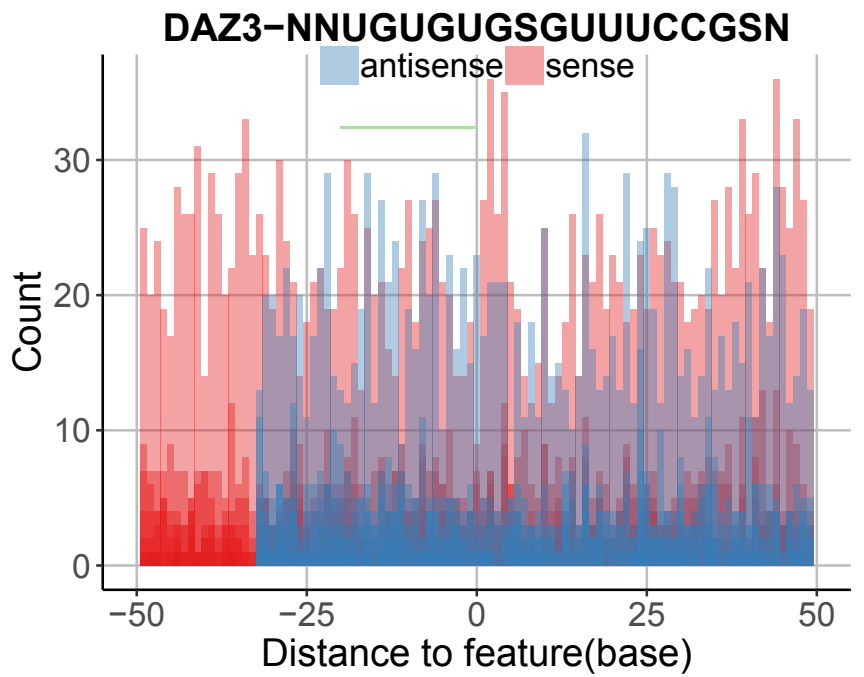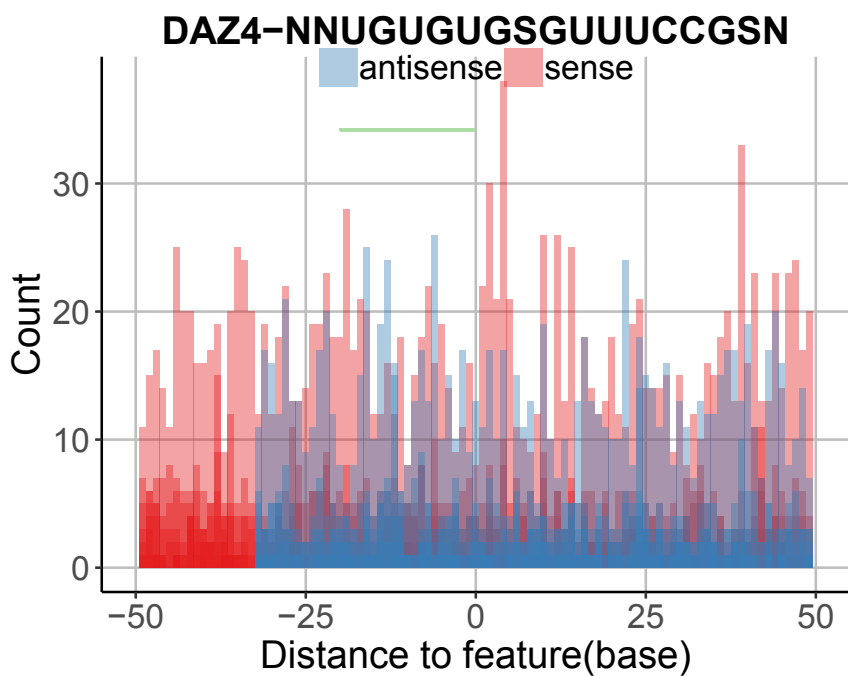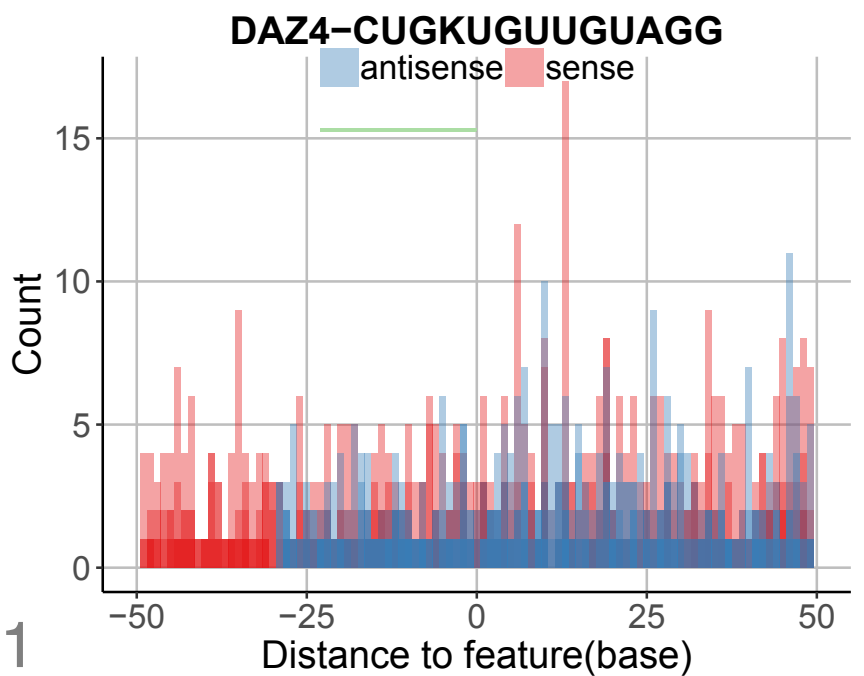

1

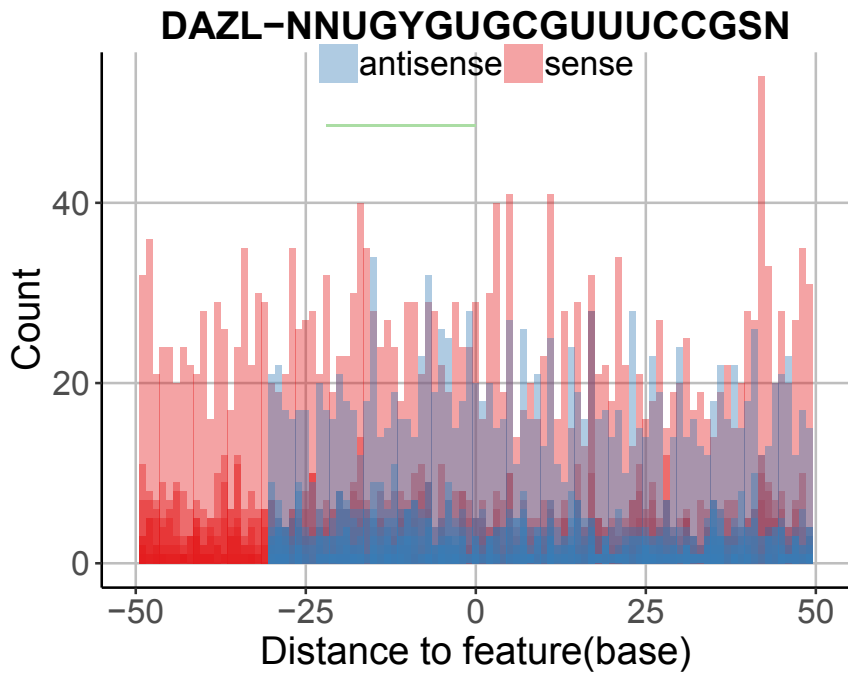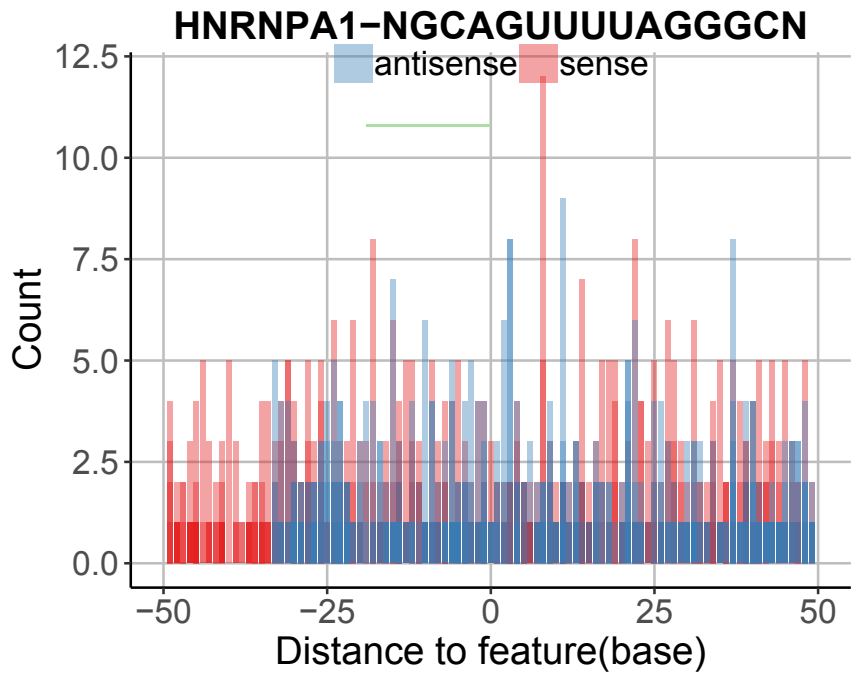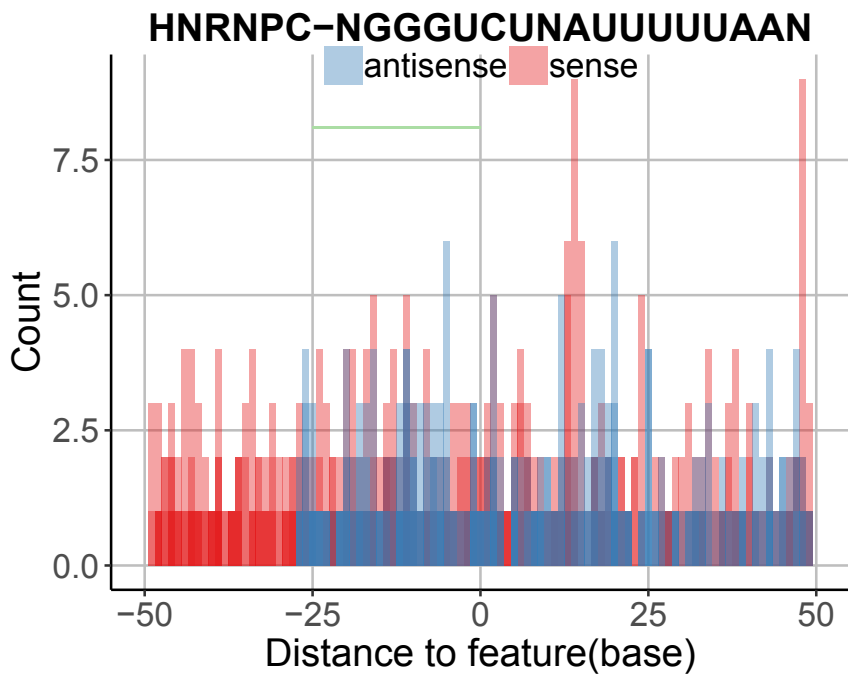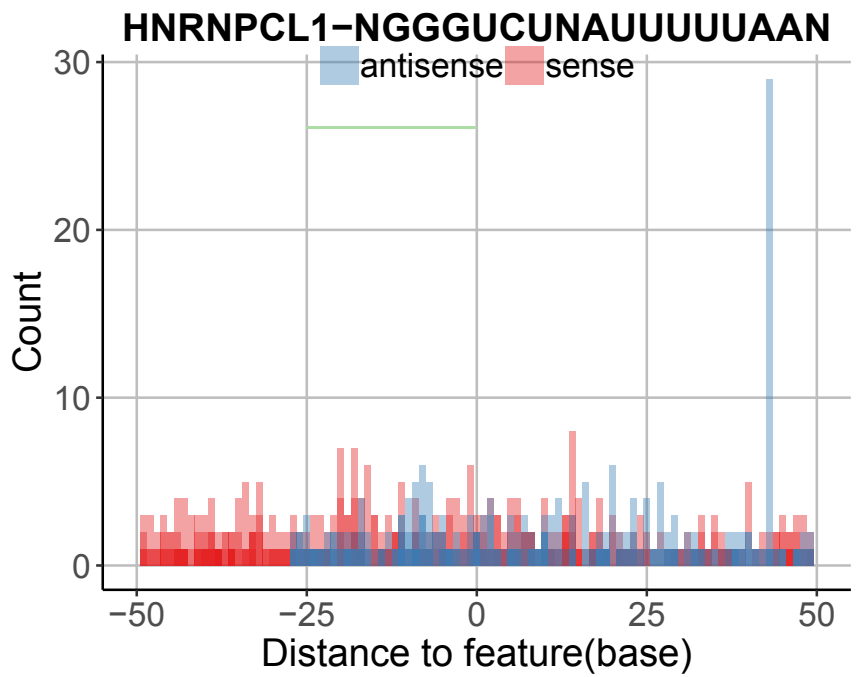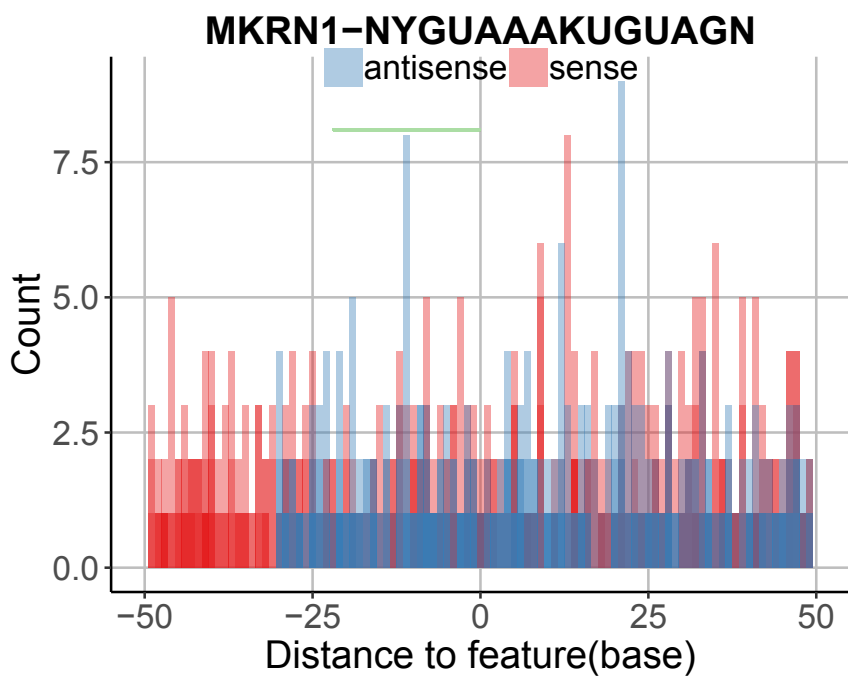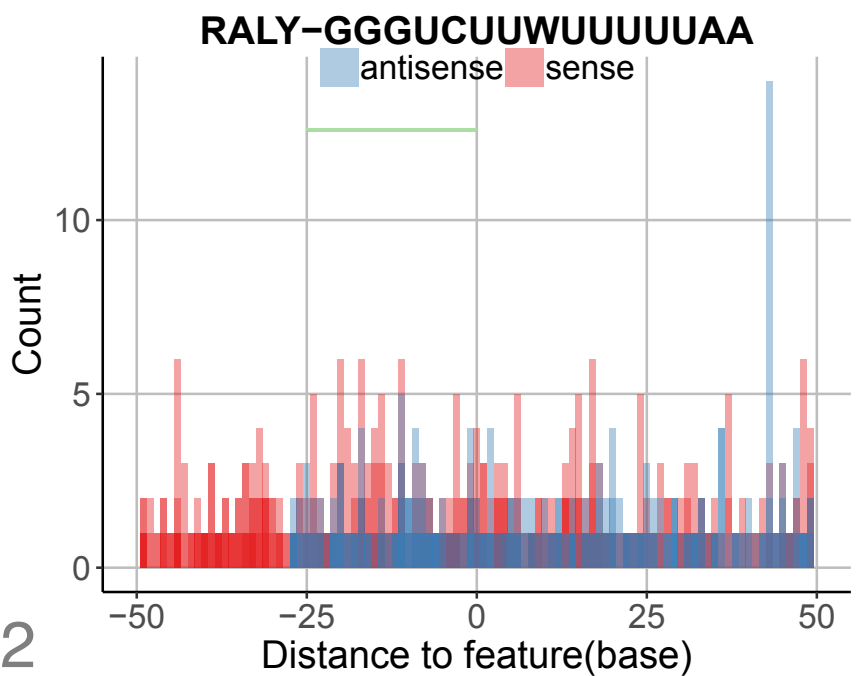

2

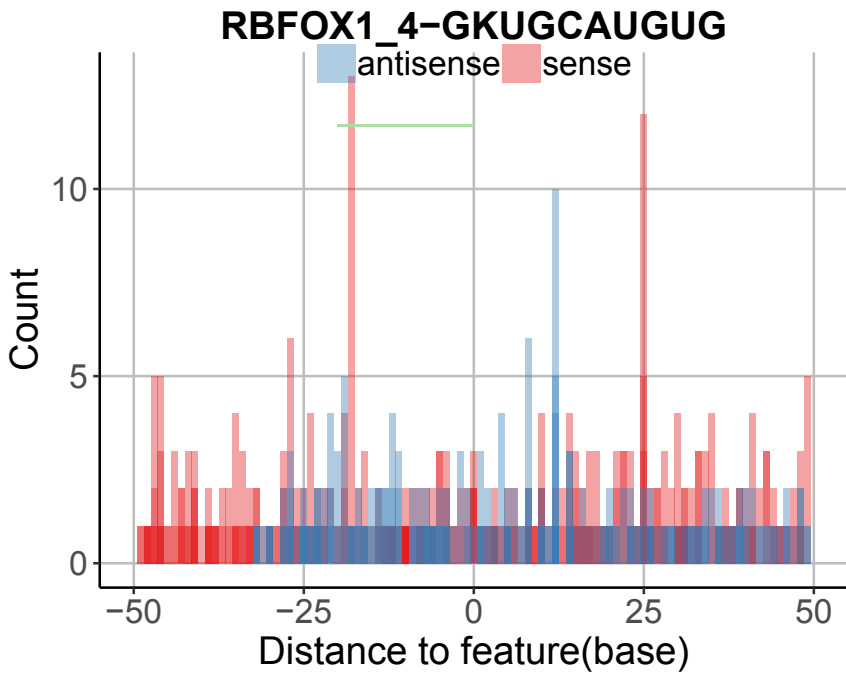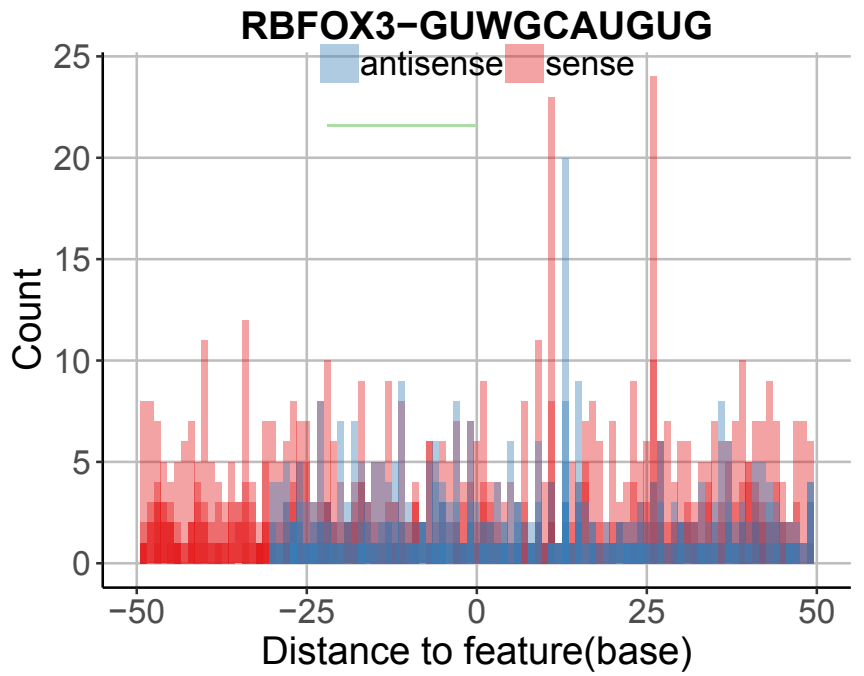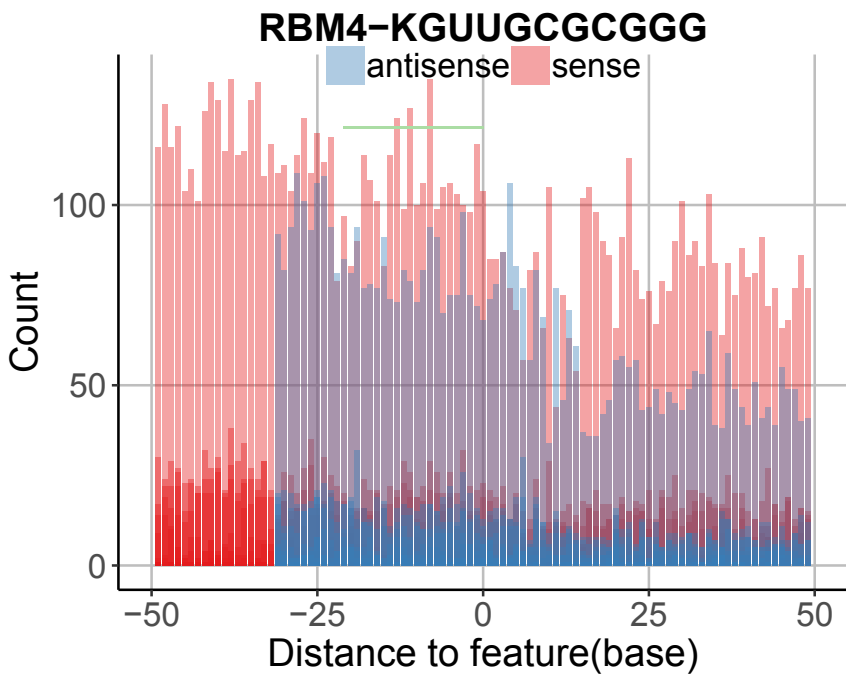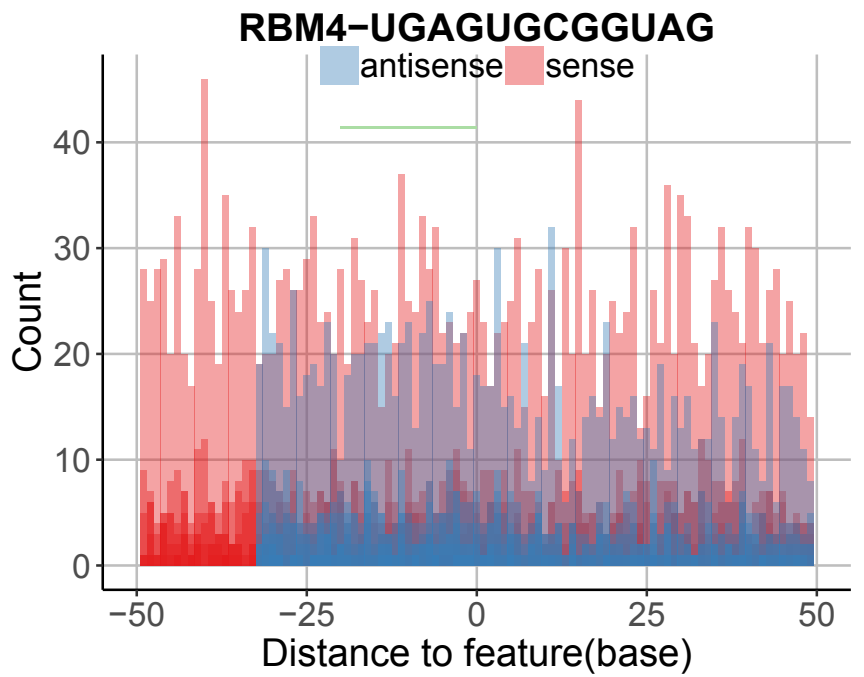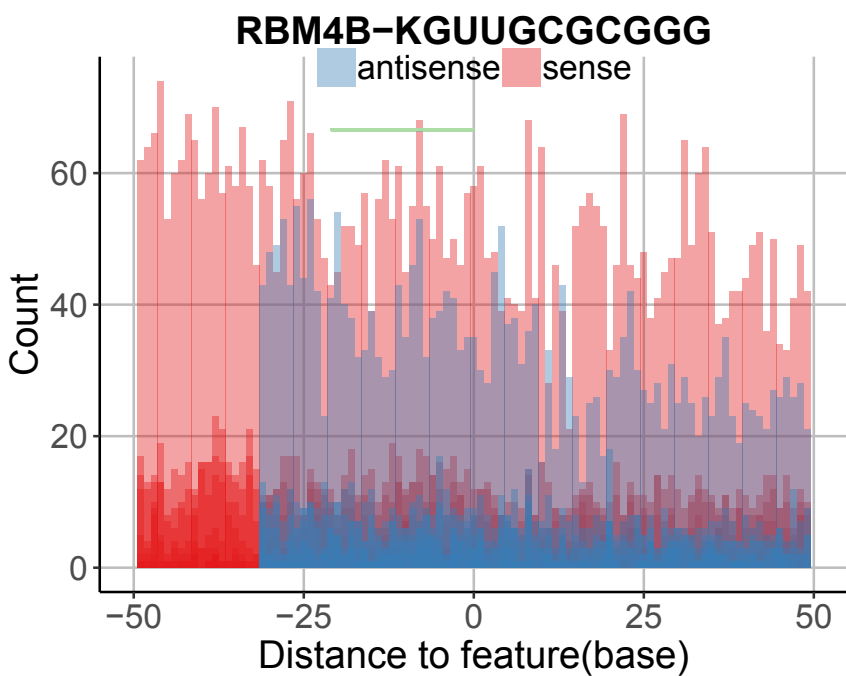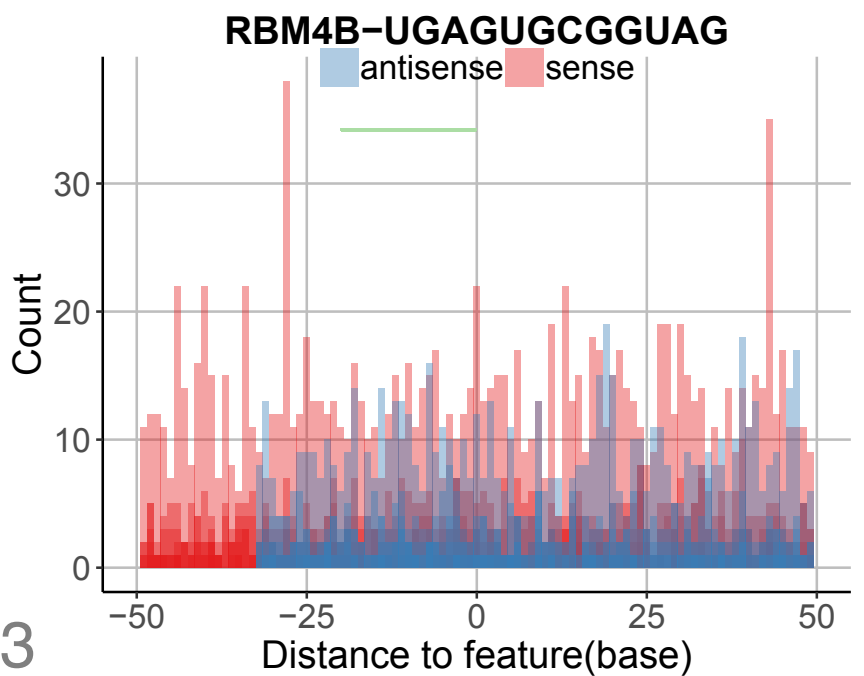

3

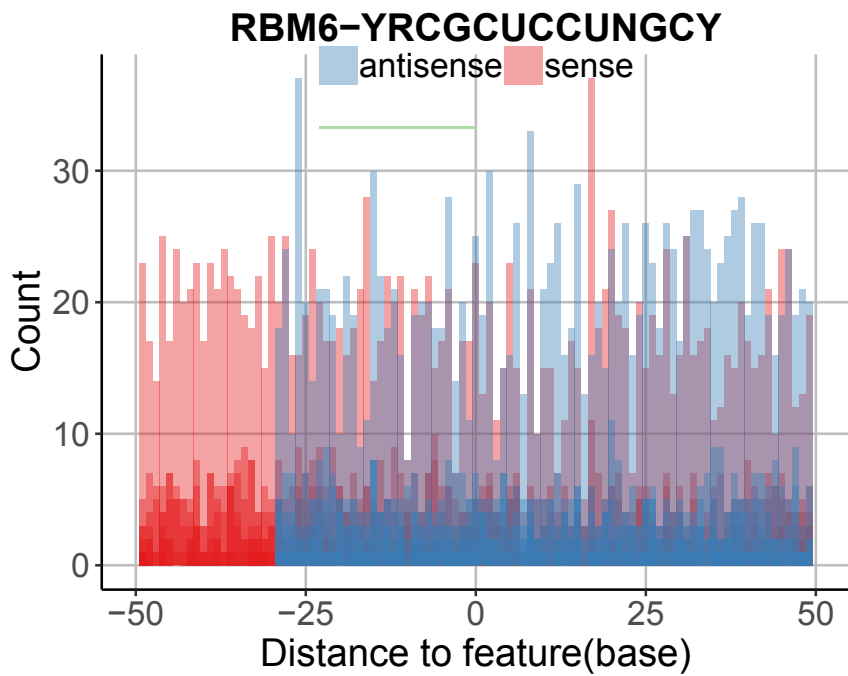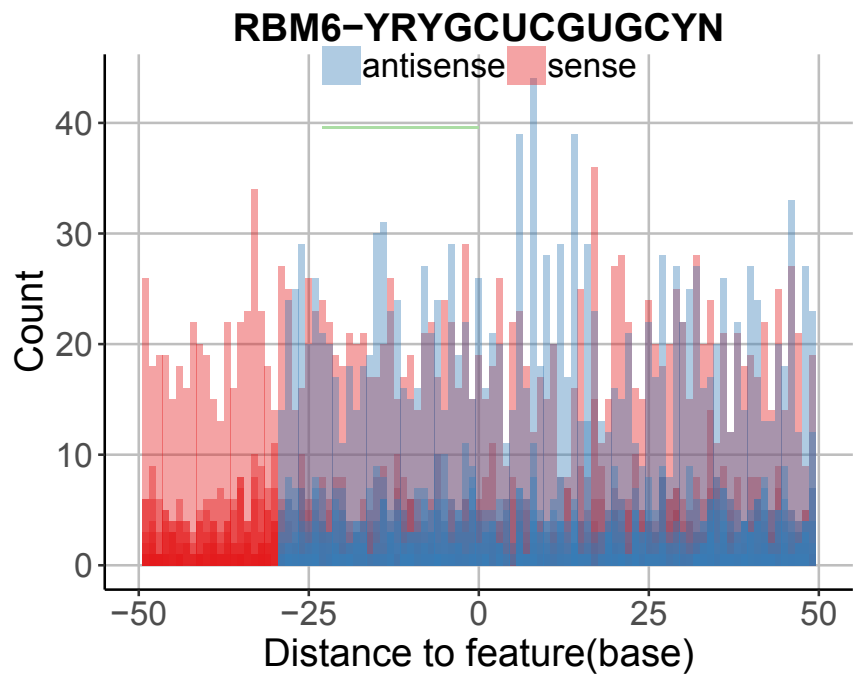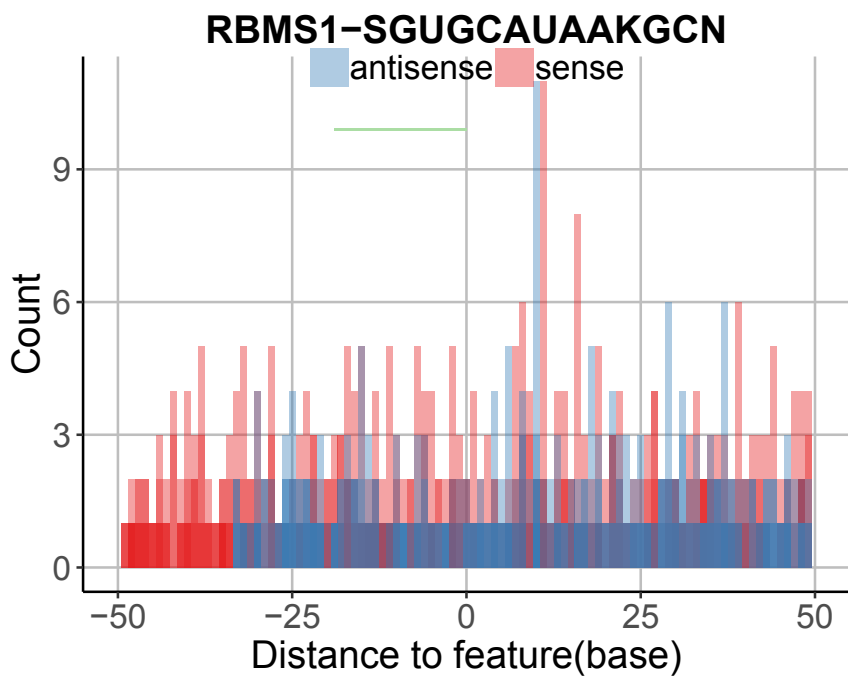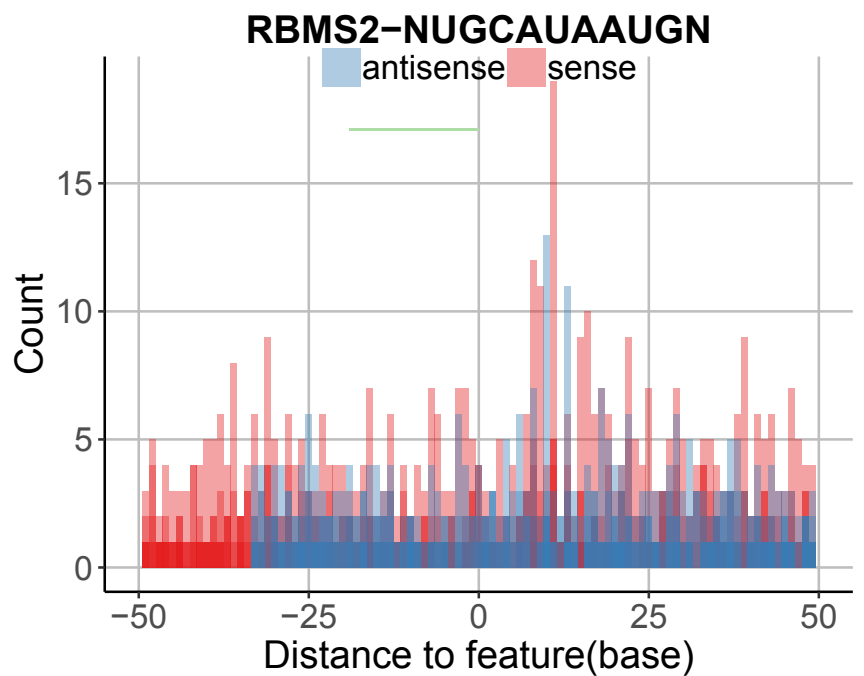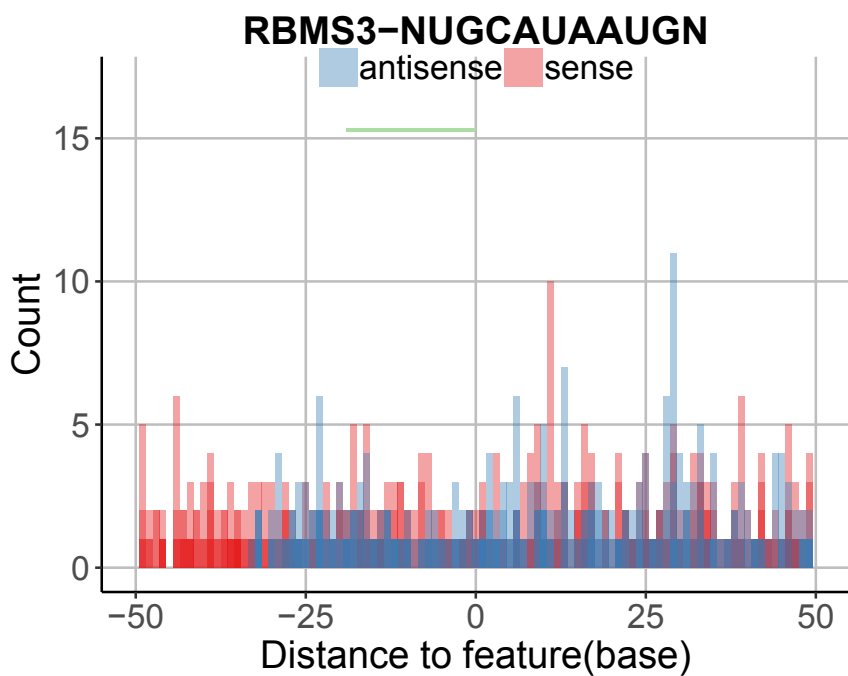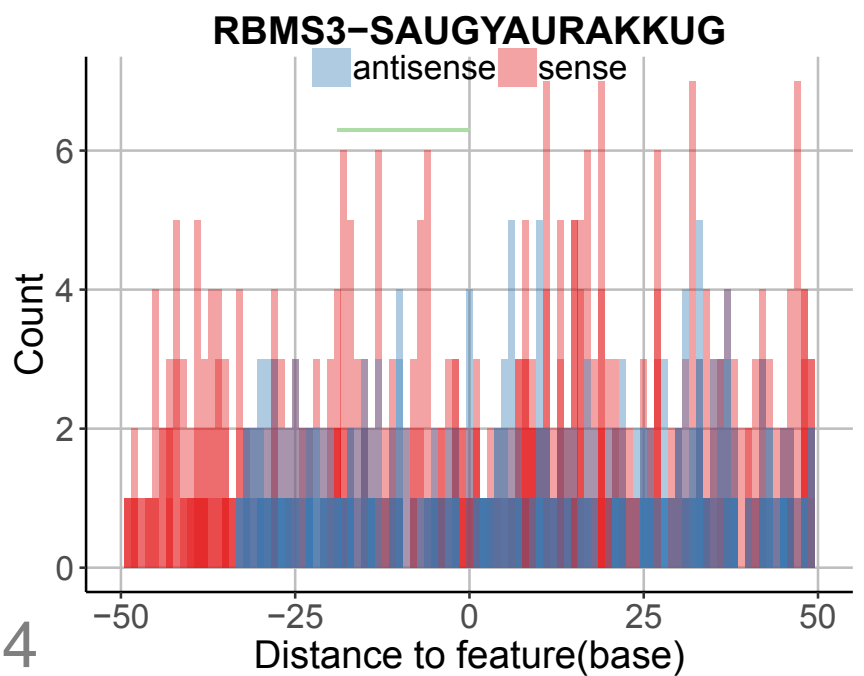

4

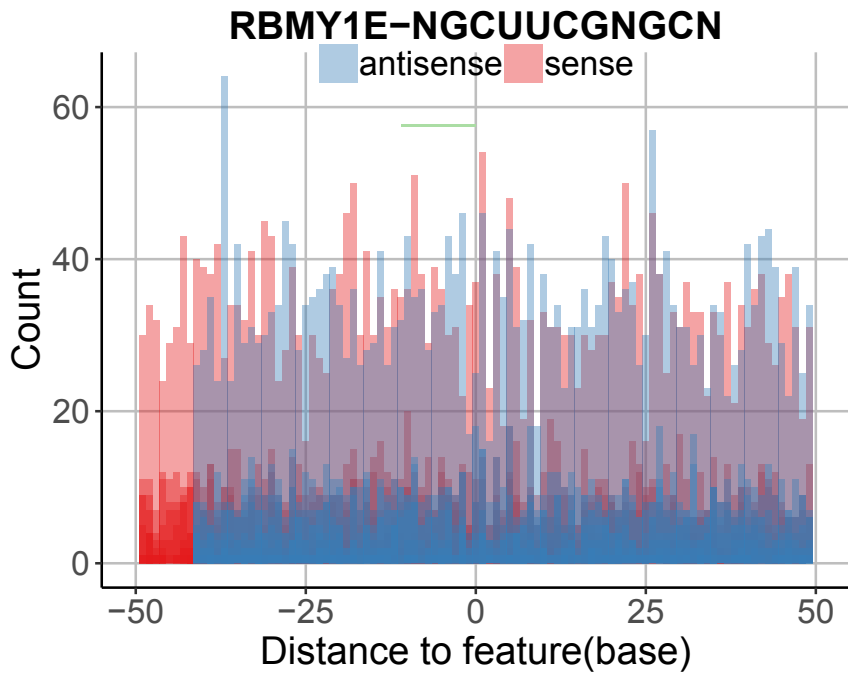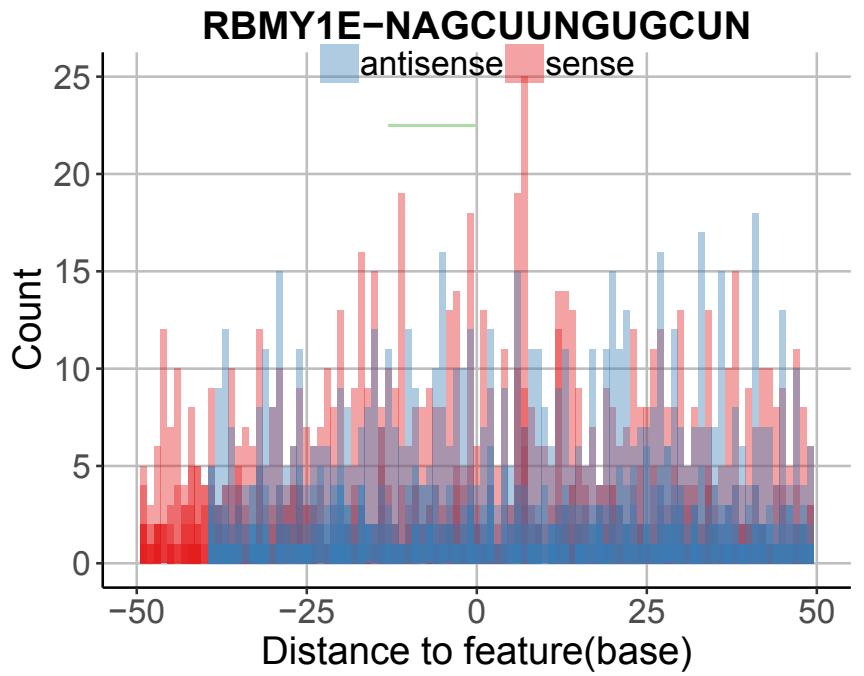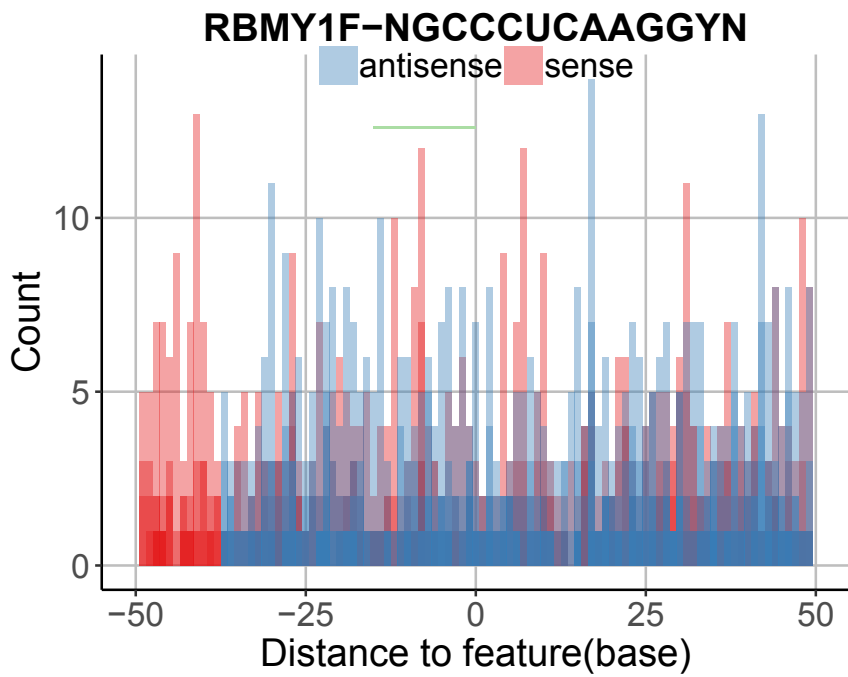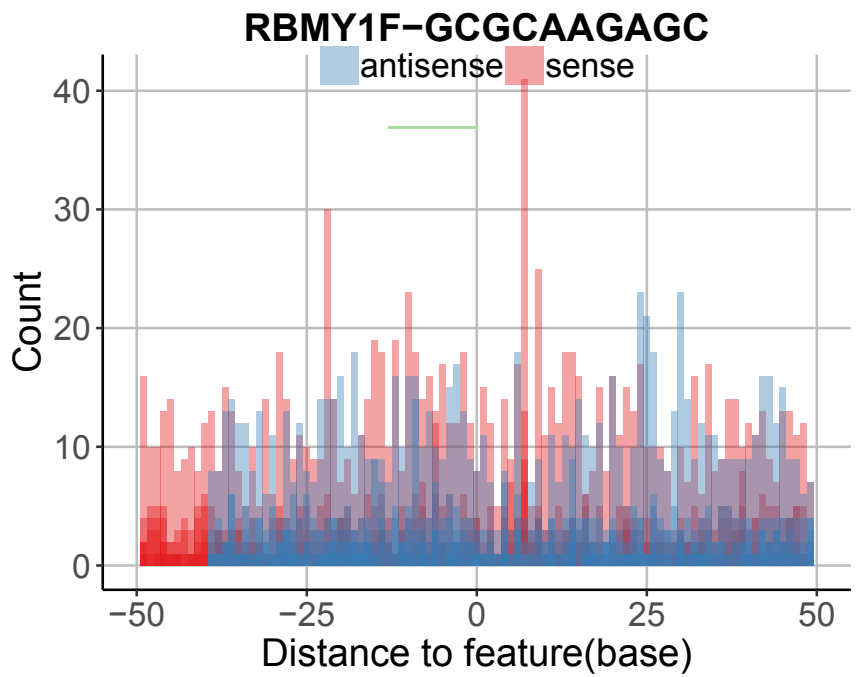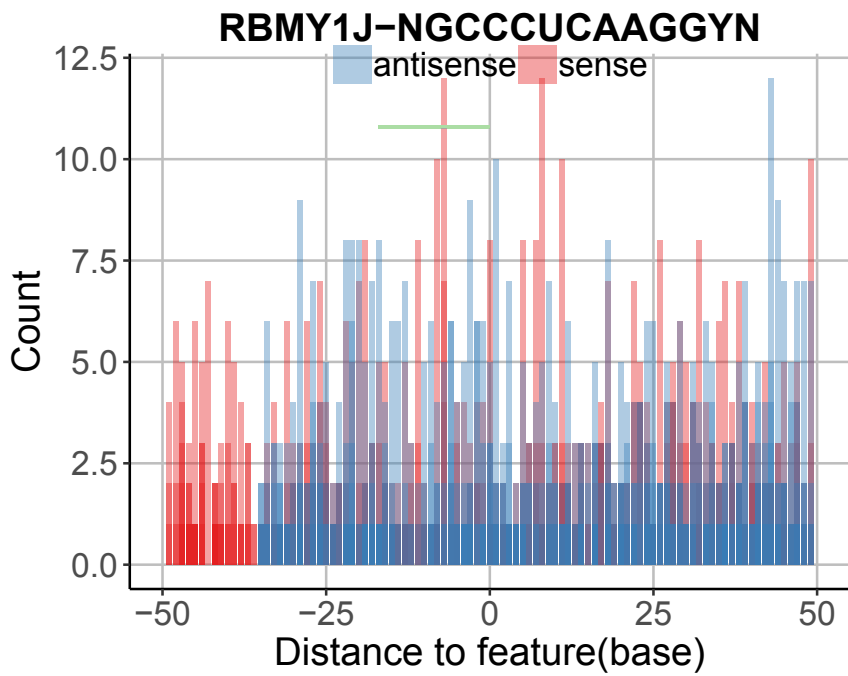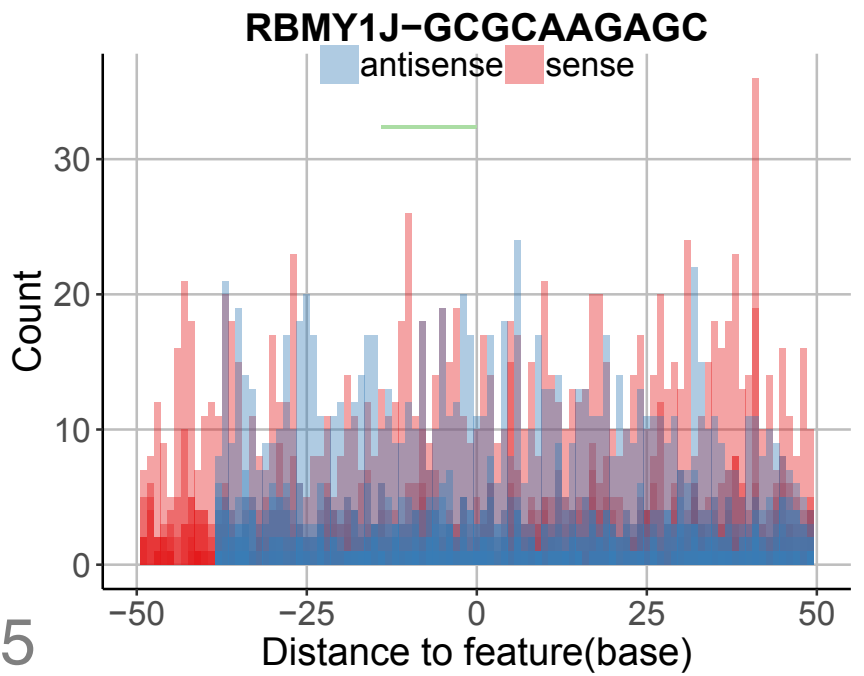

5

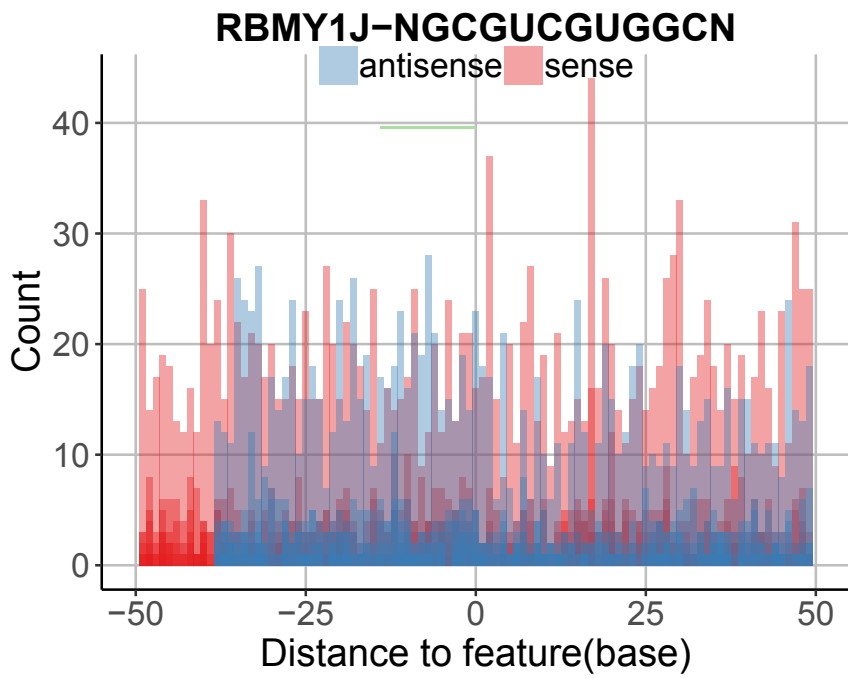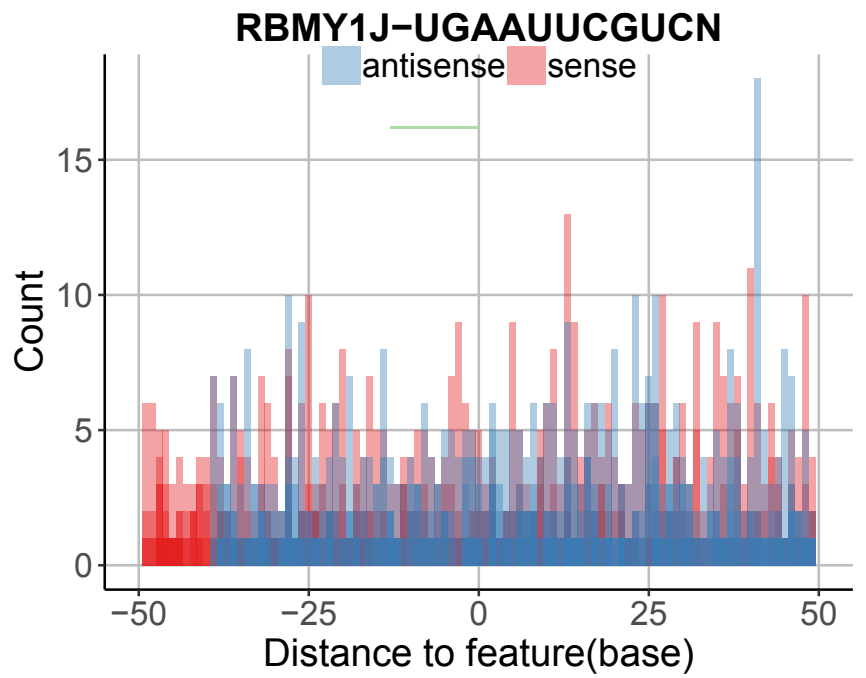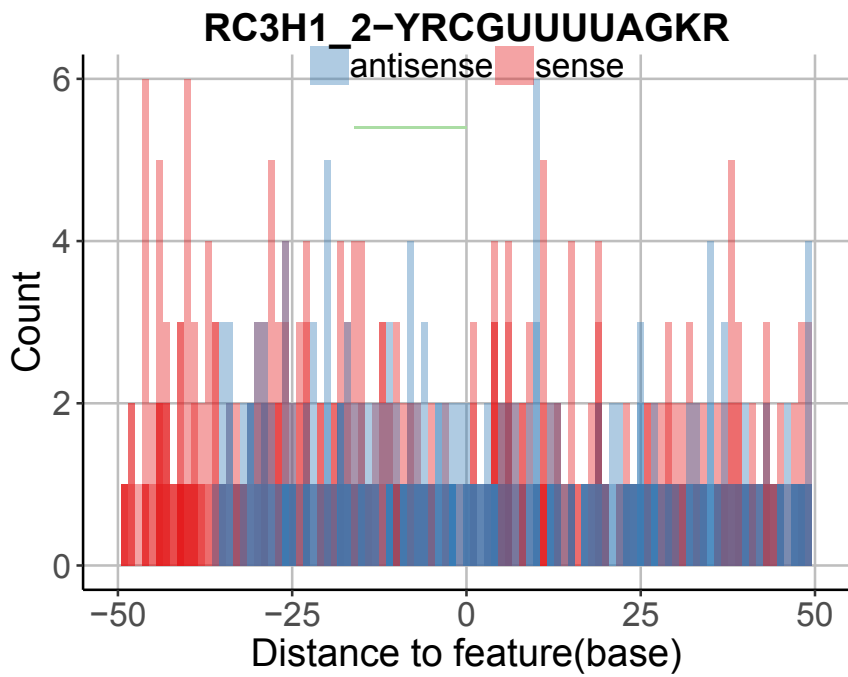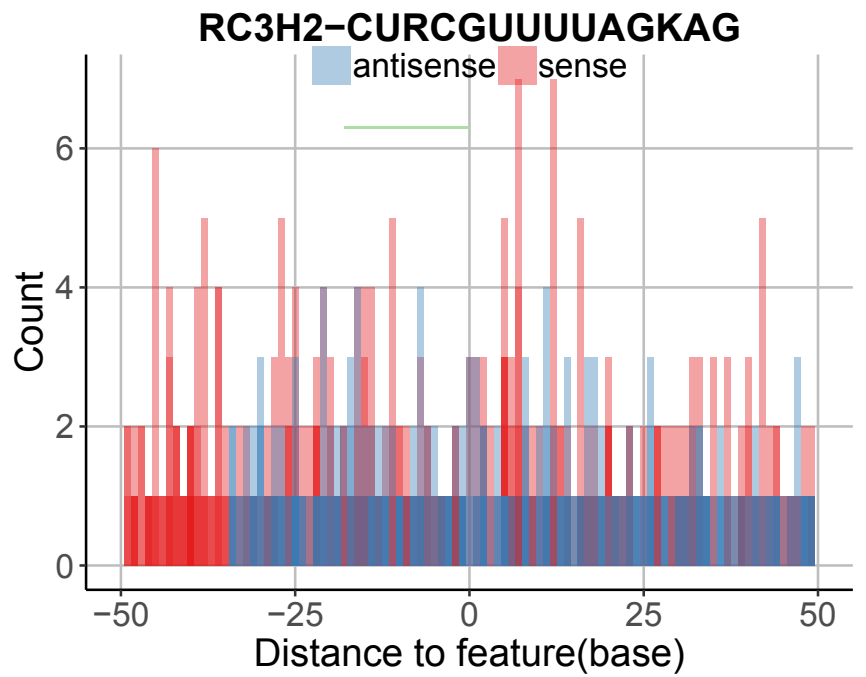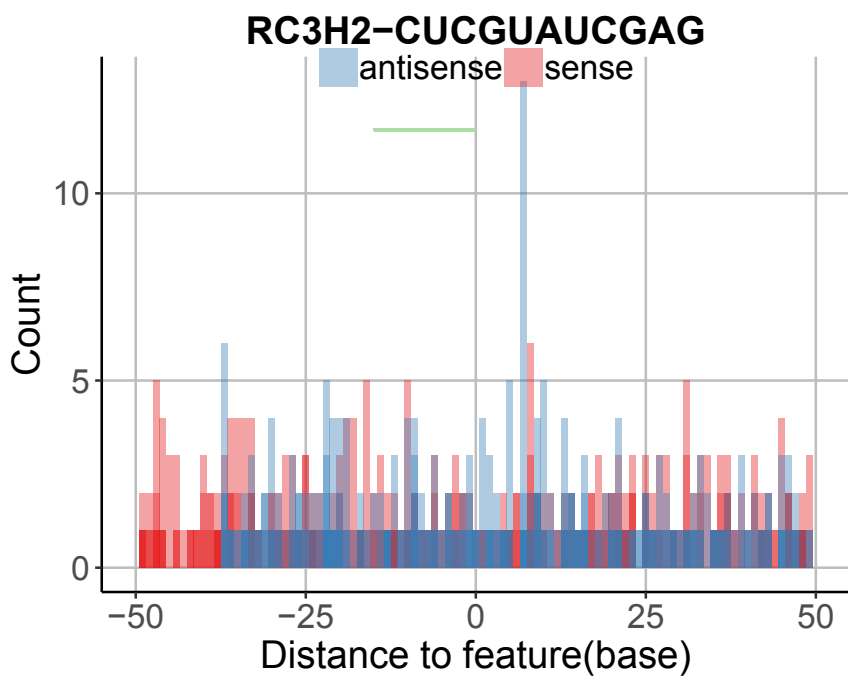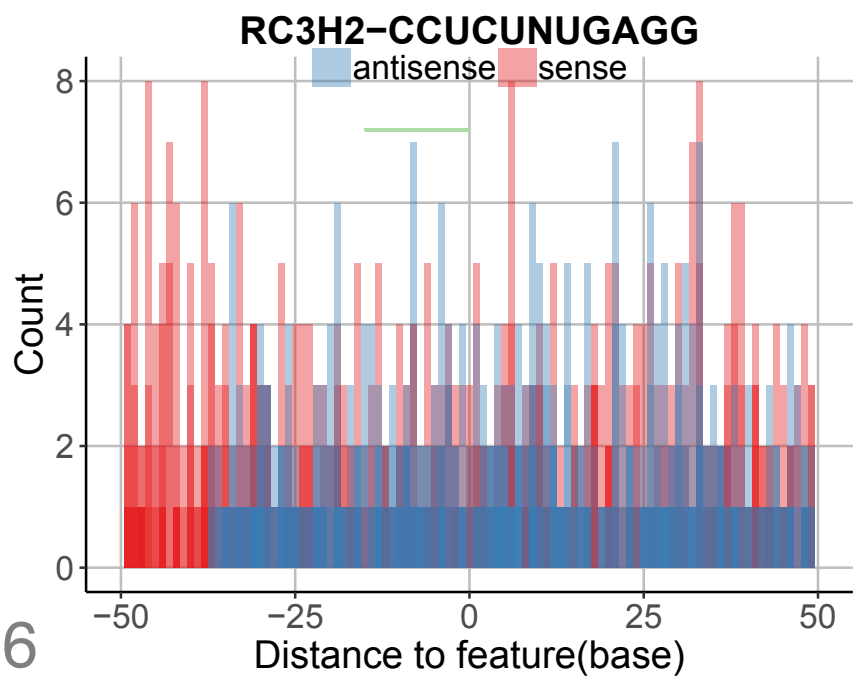

6



**RNPC3-GCAGUKUUAGGGY**

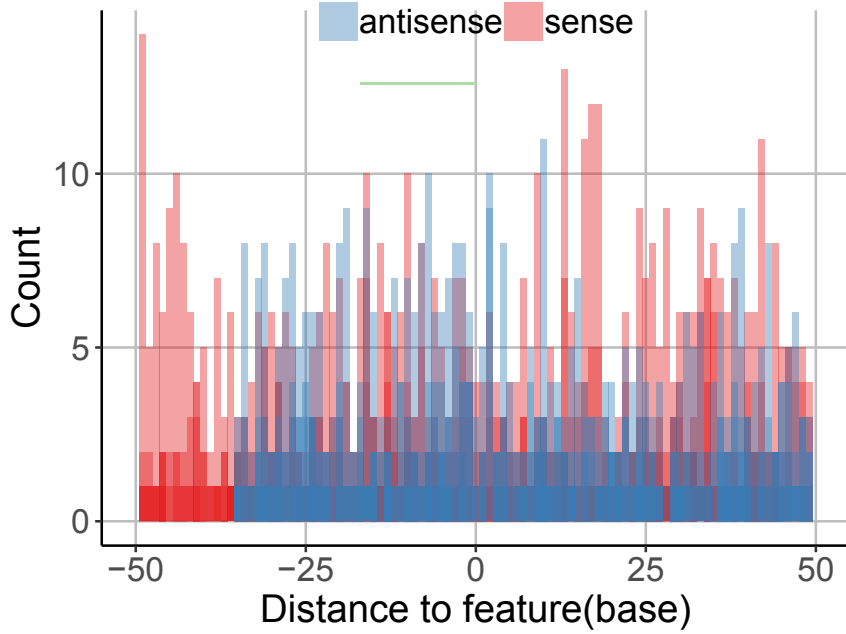

**YBX1-RCCAYRHCAUCGY**

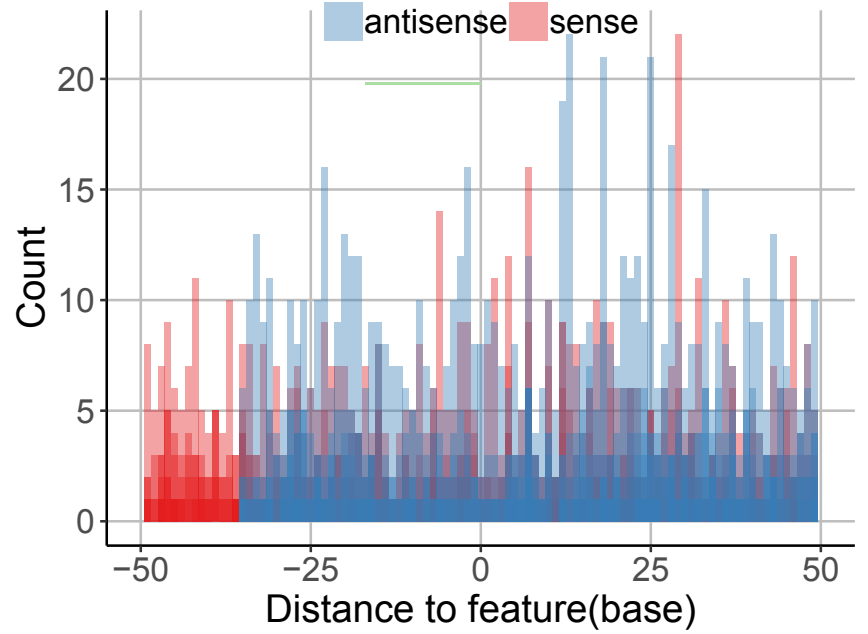

**ZC3H12A-NGCAGGUAAGUGCN**

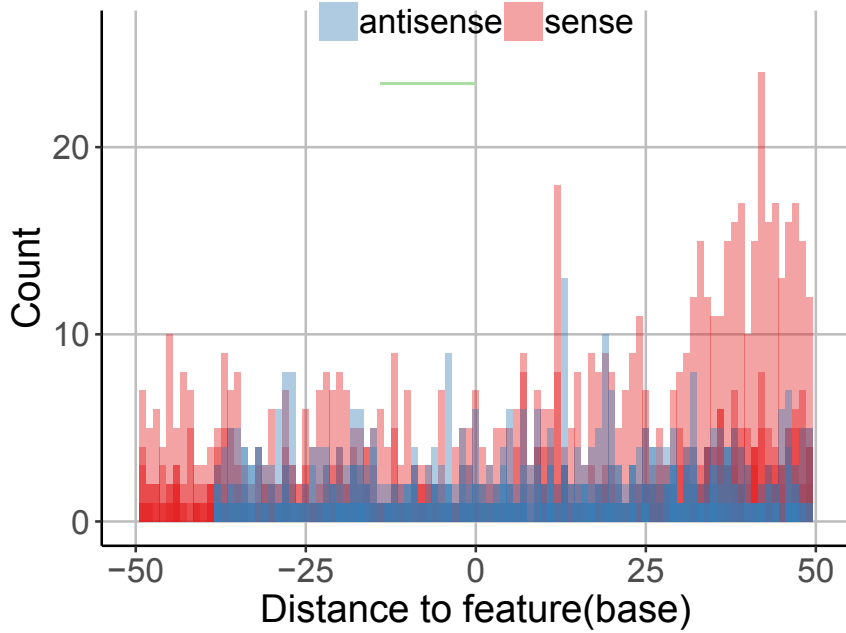

**ZC3H12B-NGCAGGUAAGUGSN**

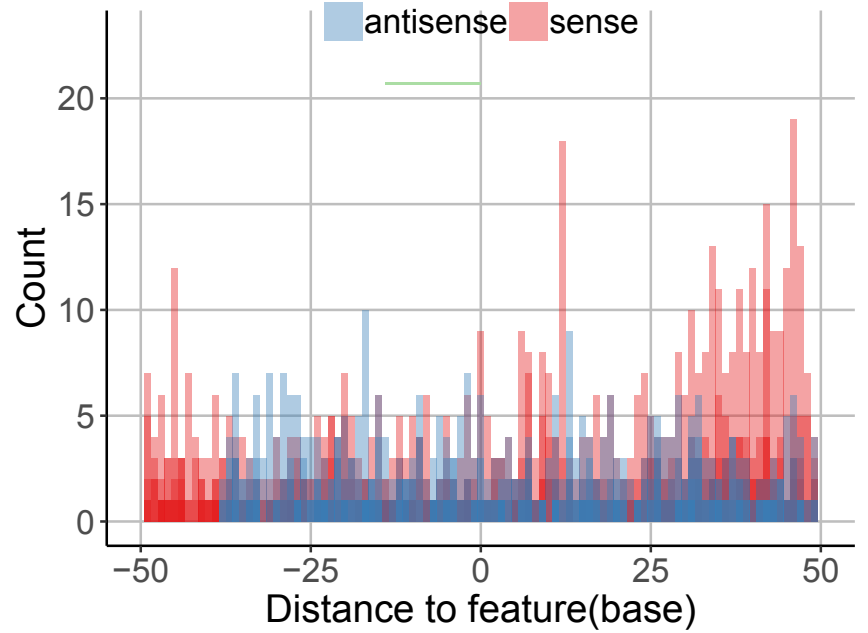

**ZC3H12B-SCAGGUAUUAUGS**

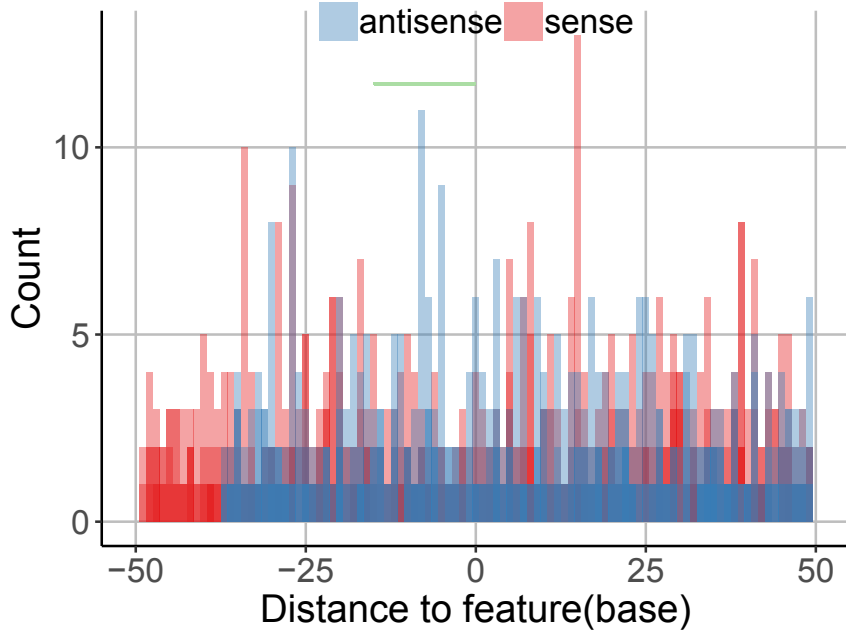

7

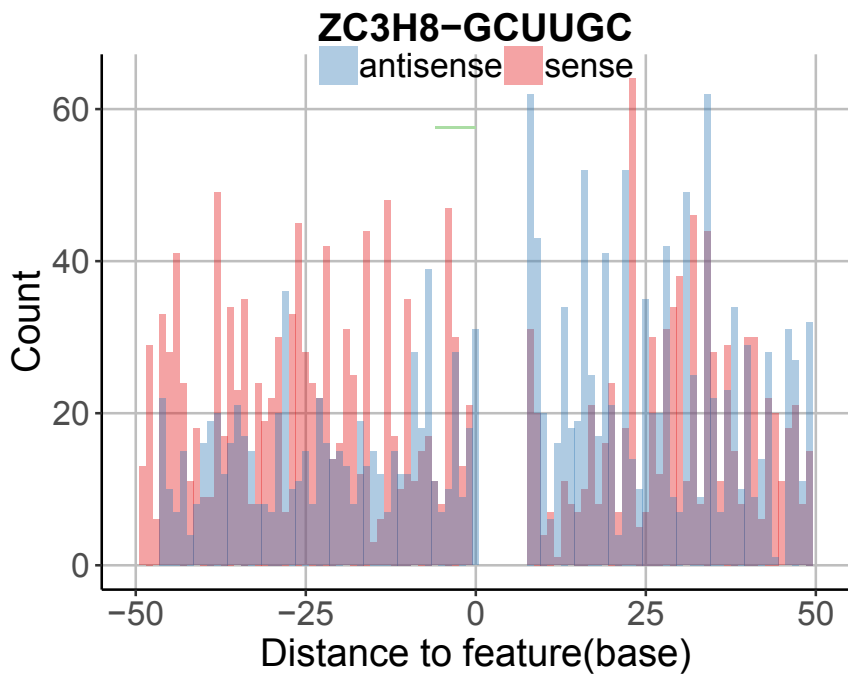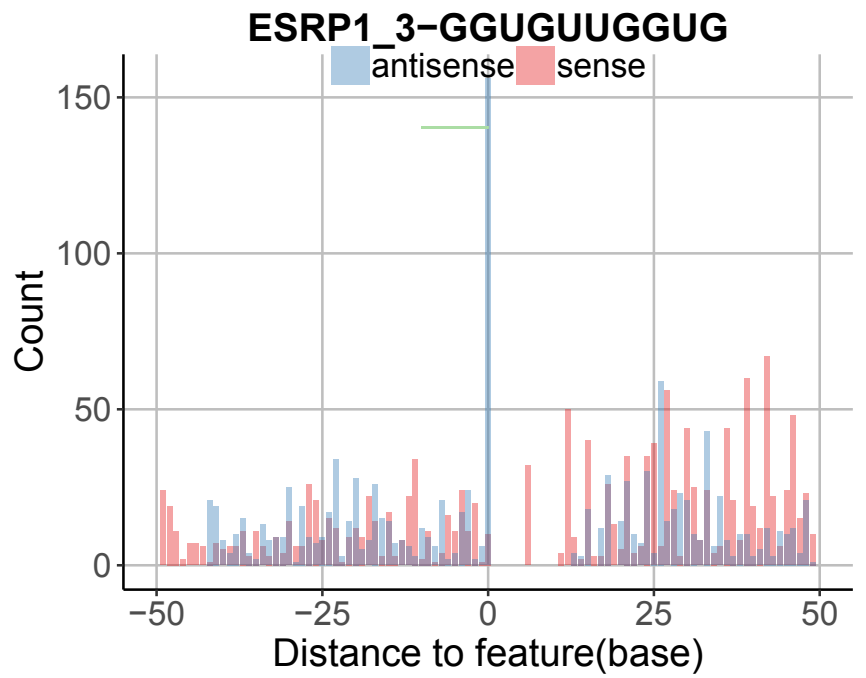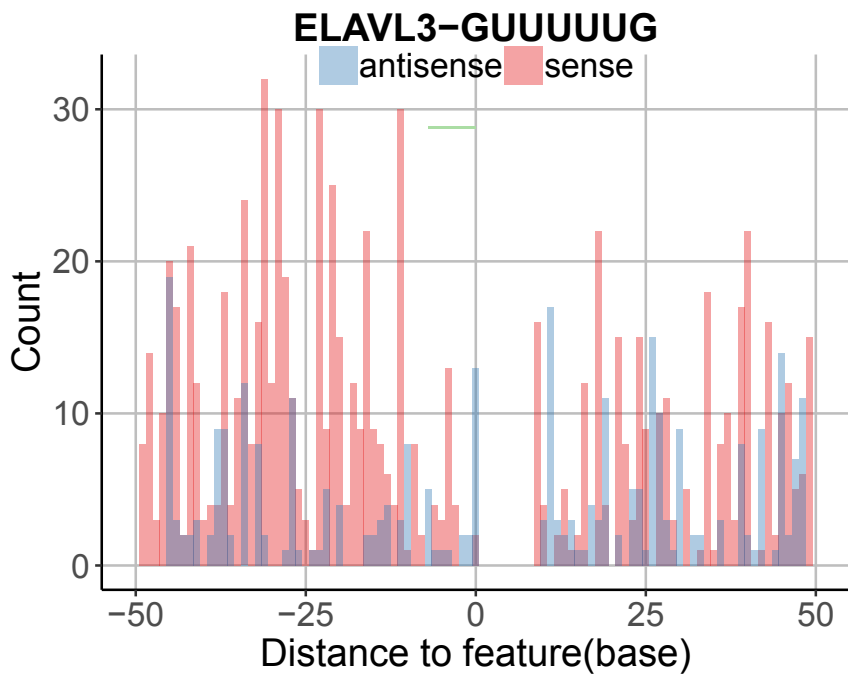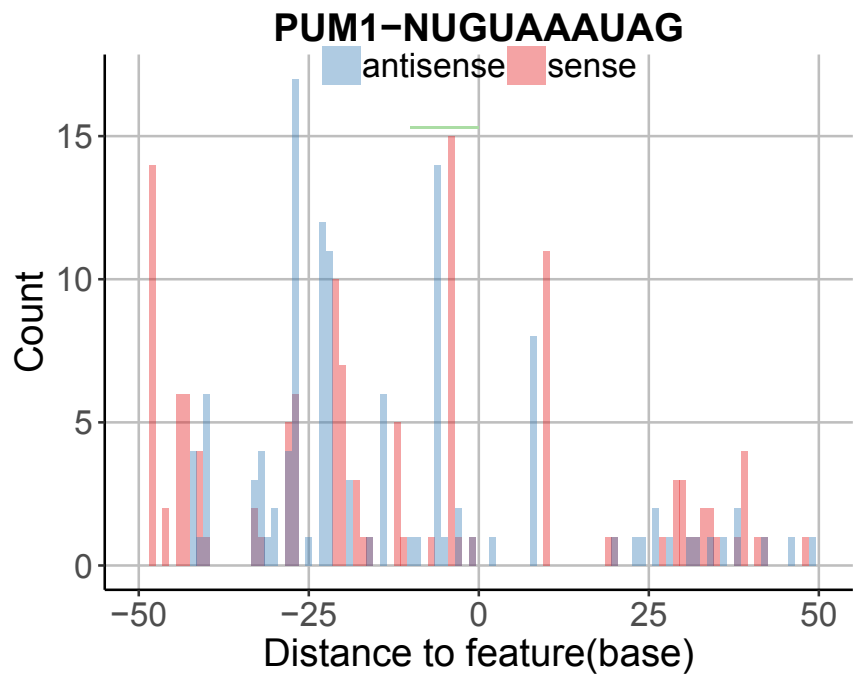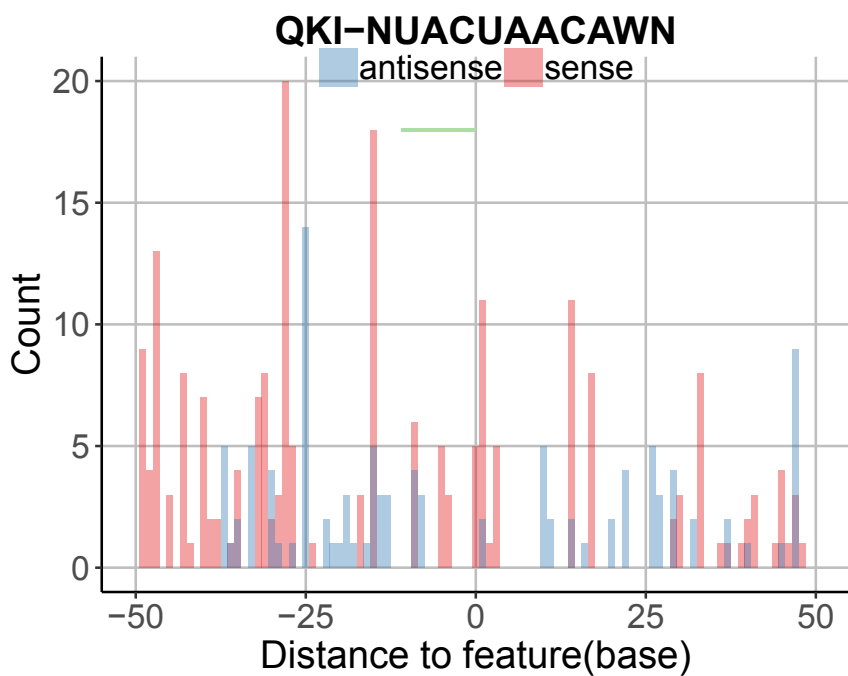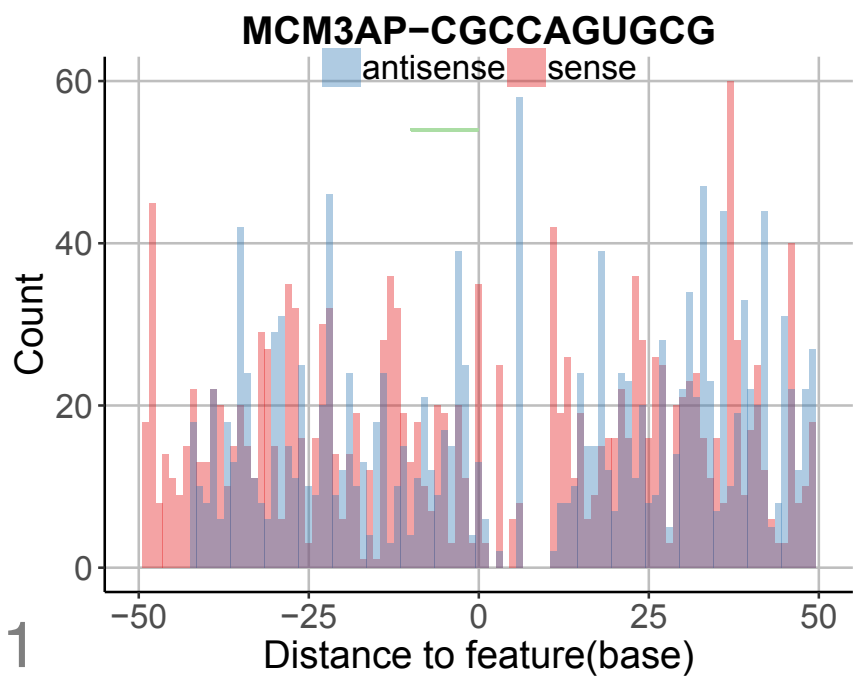

1

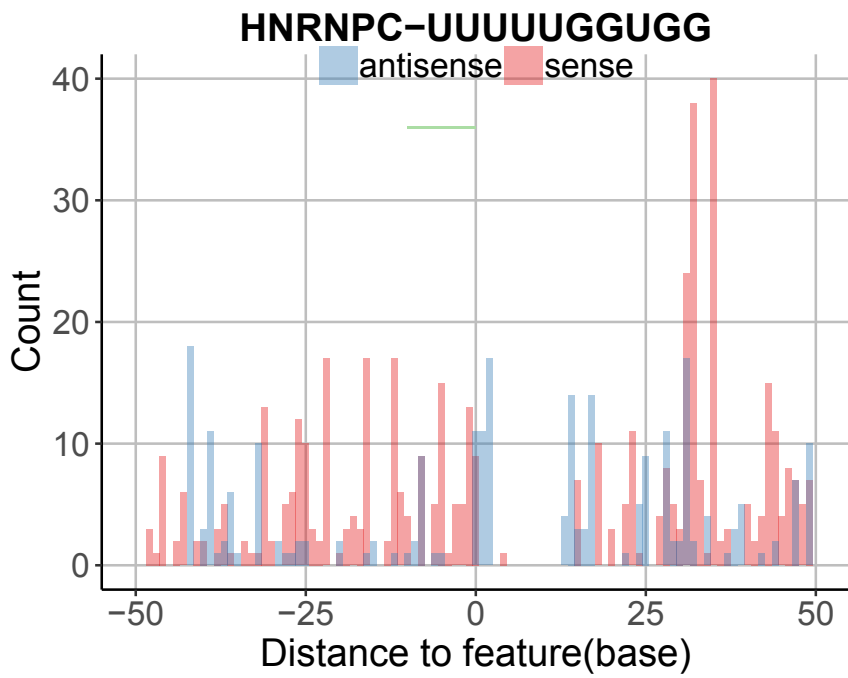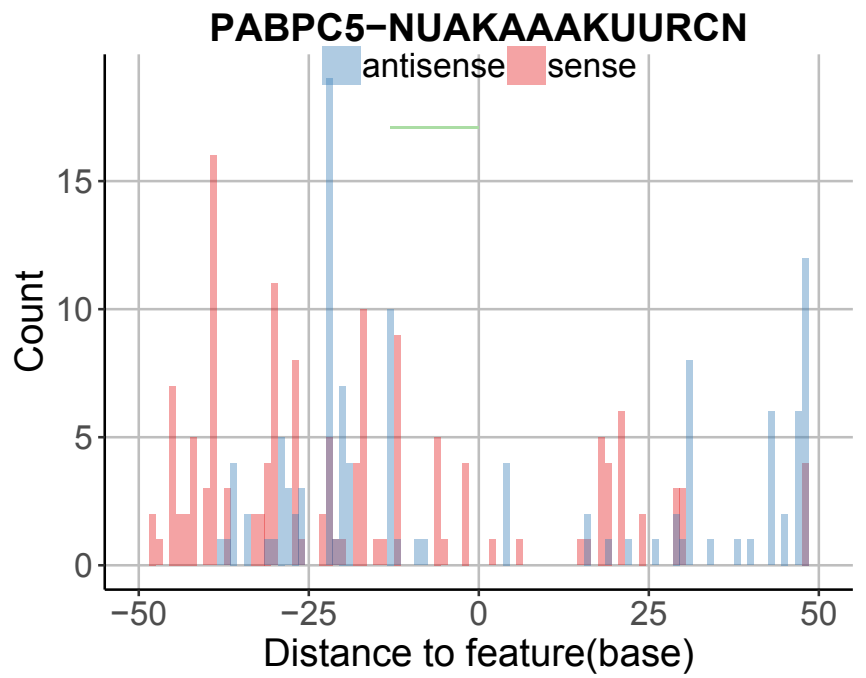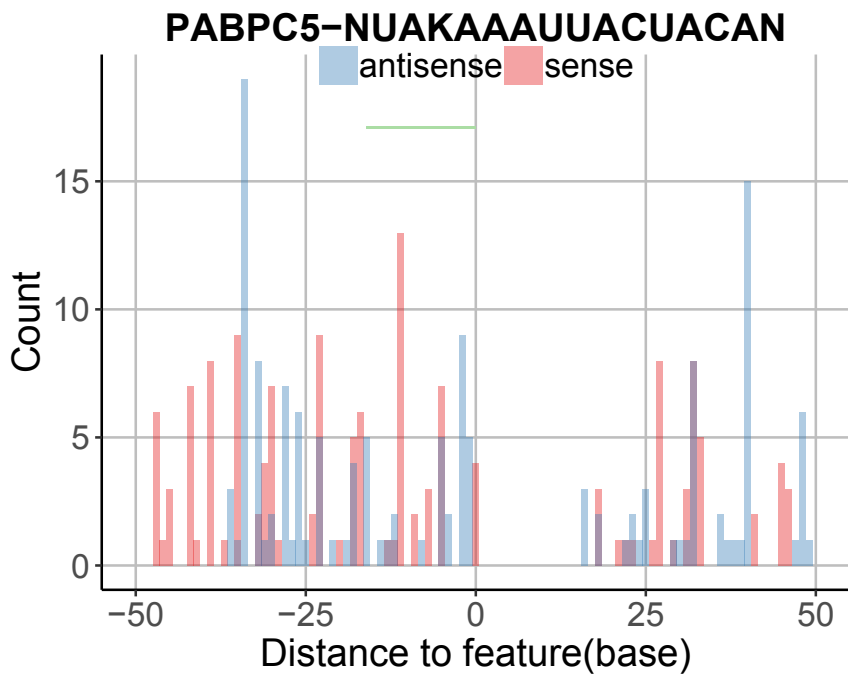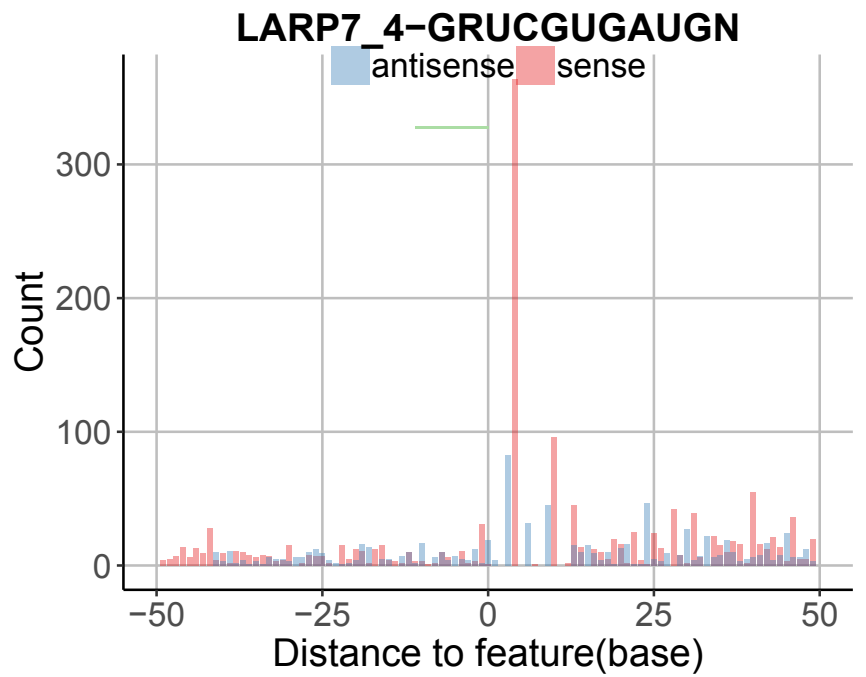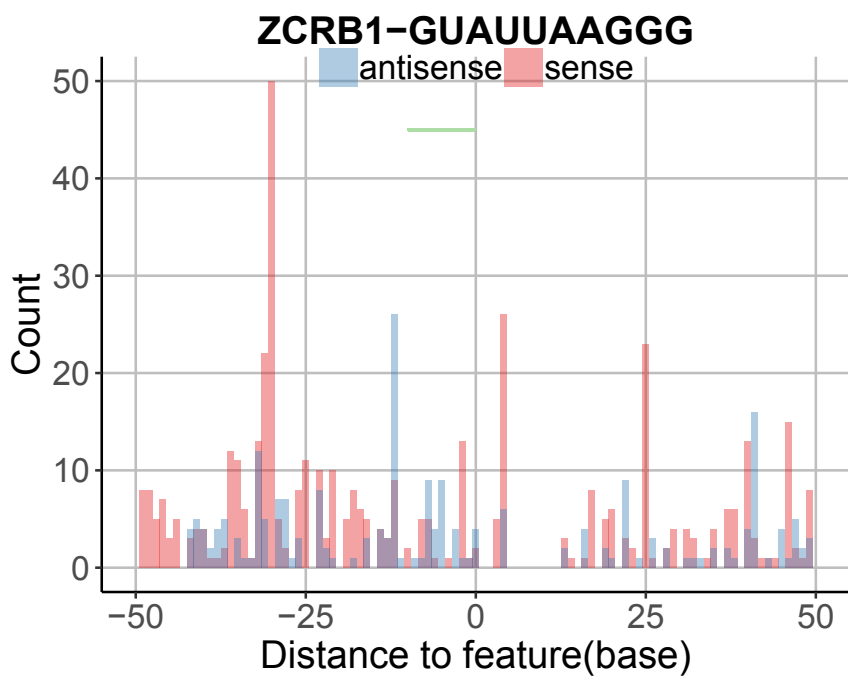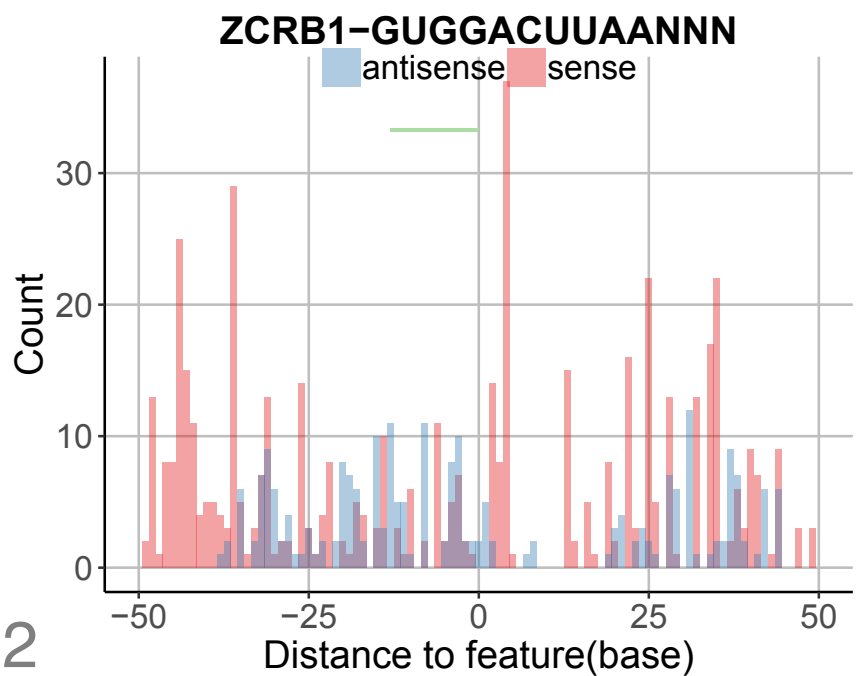

2

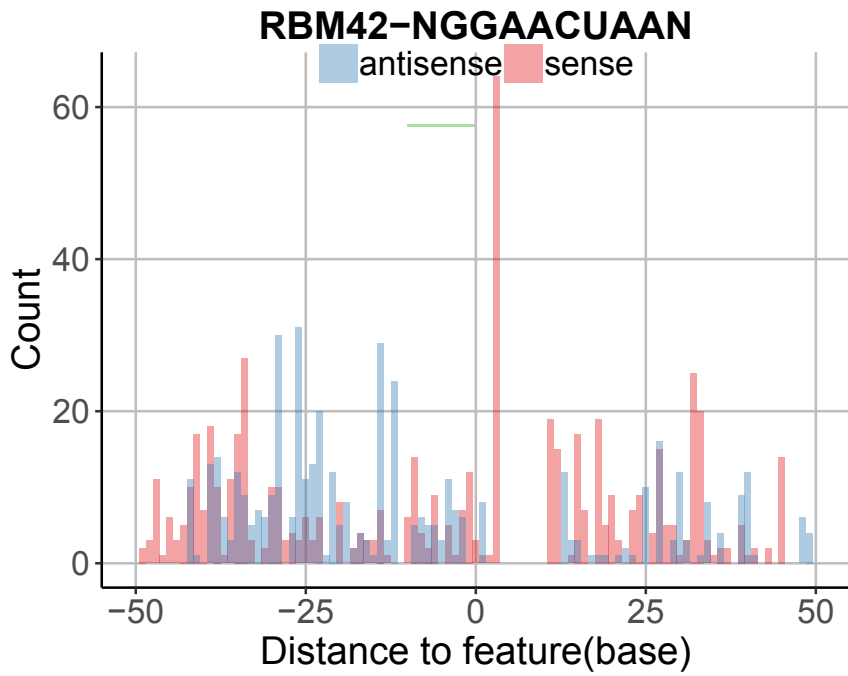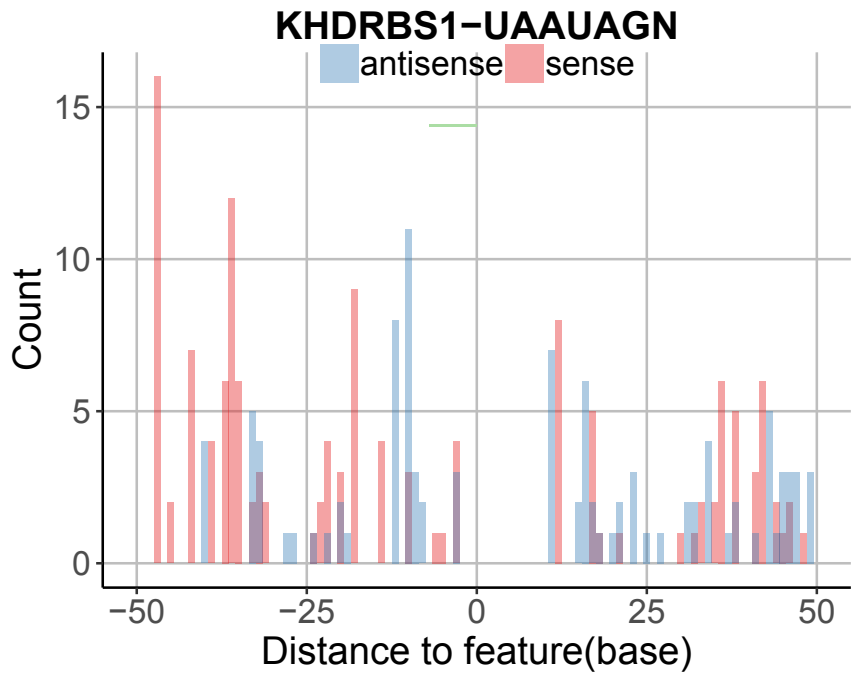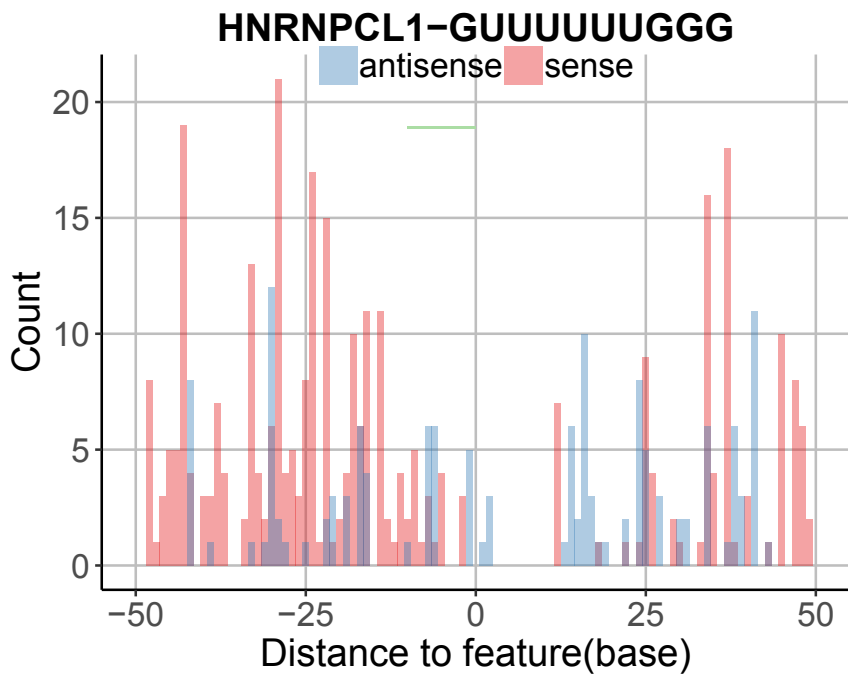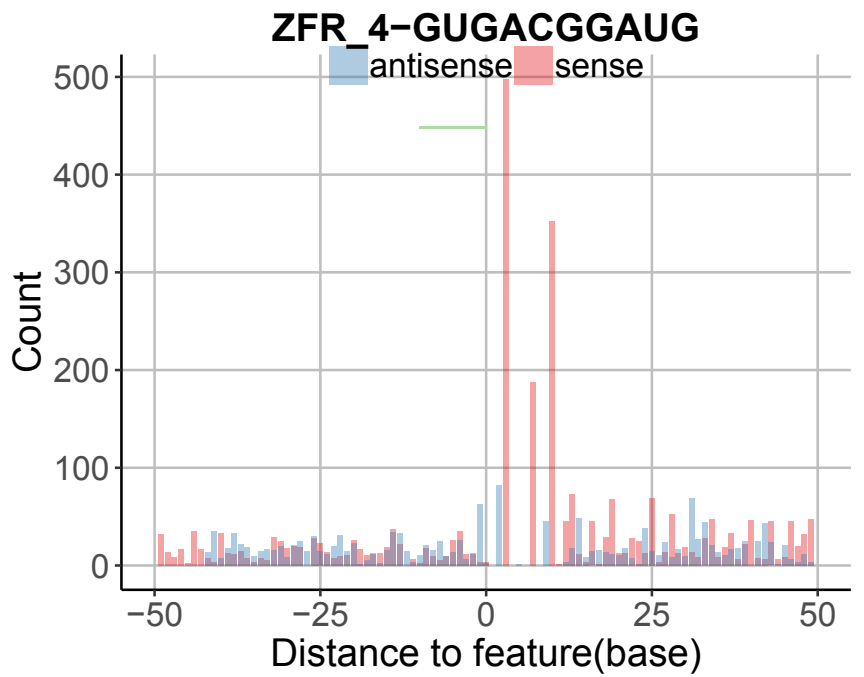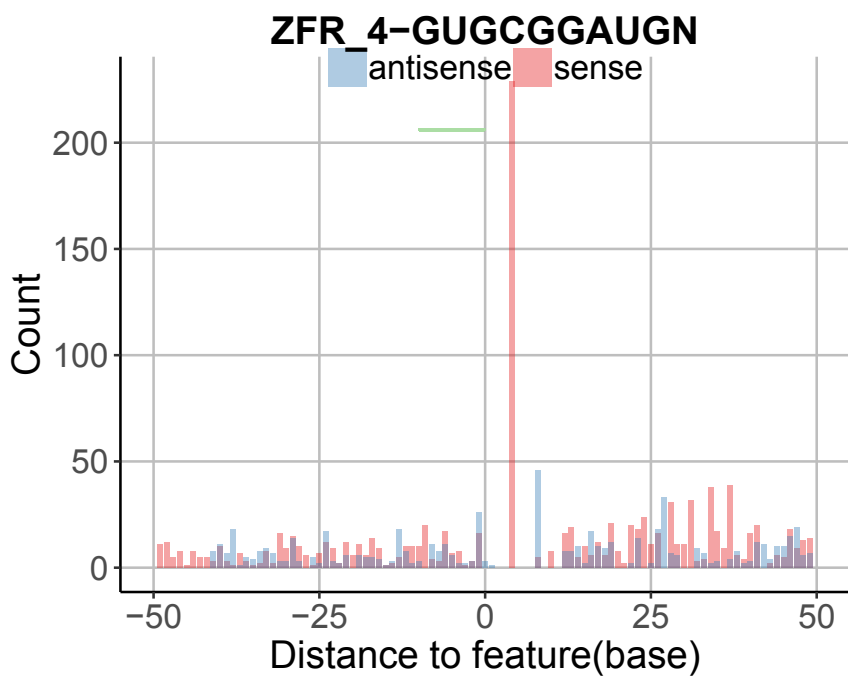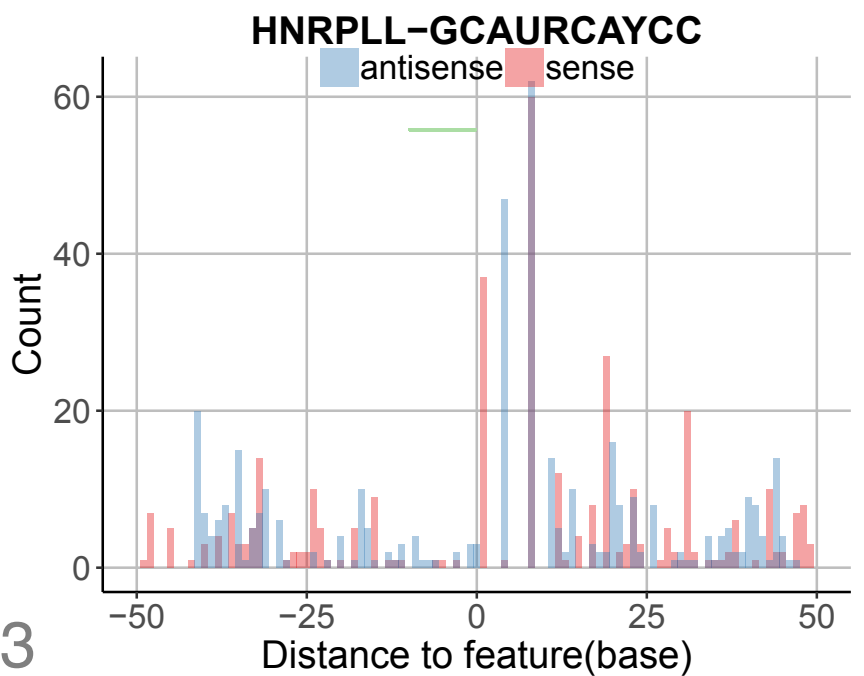

3

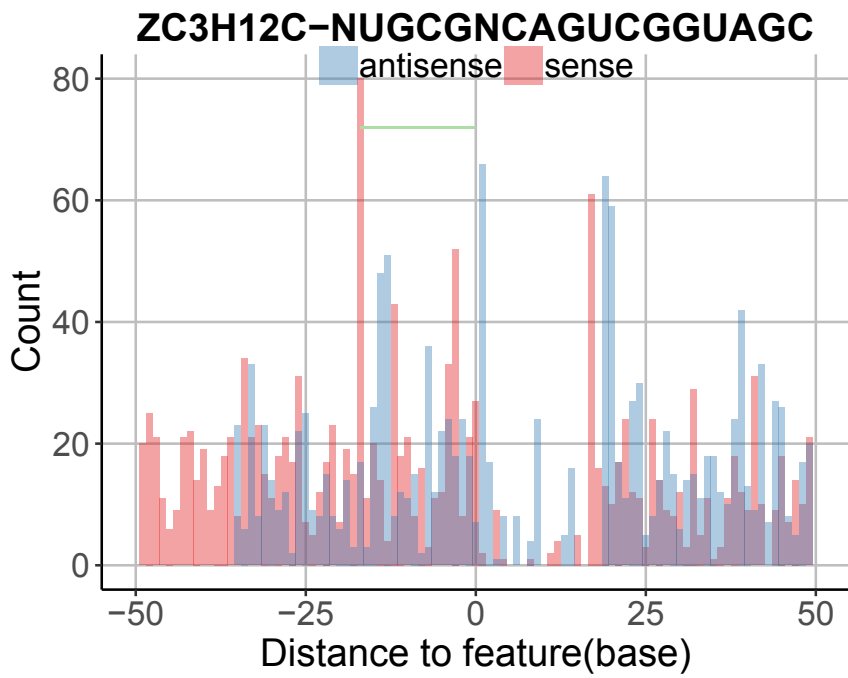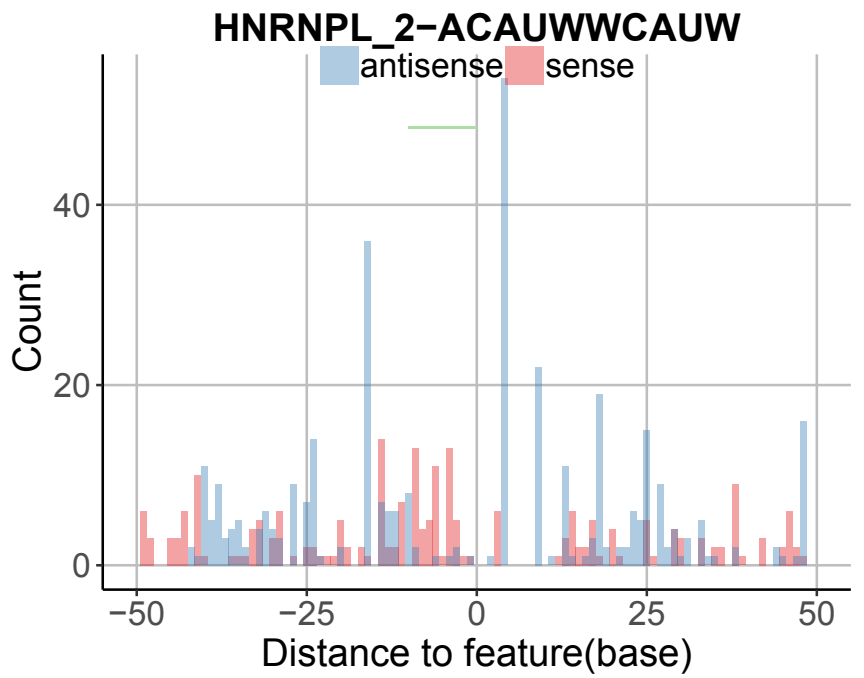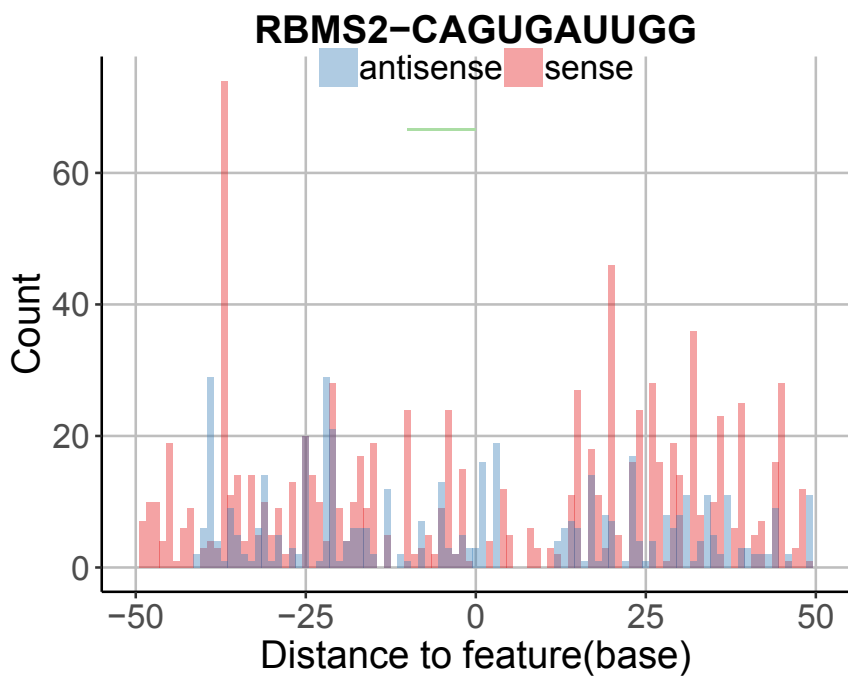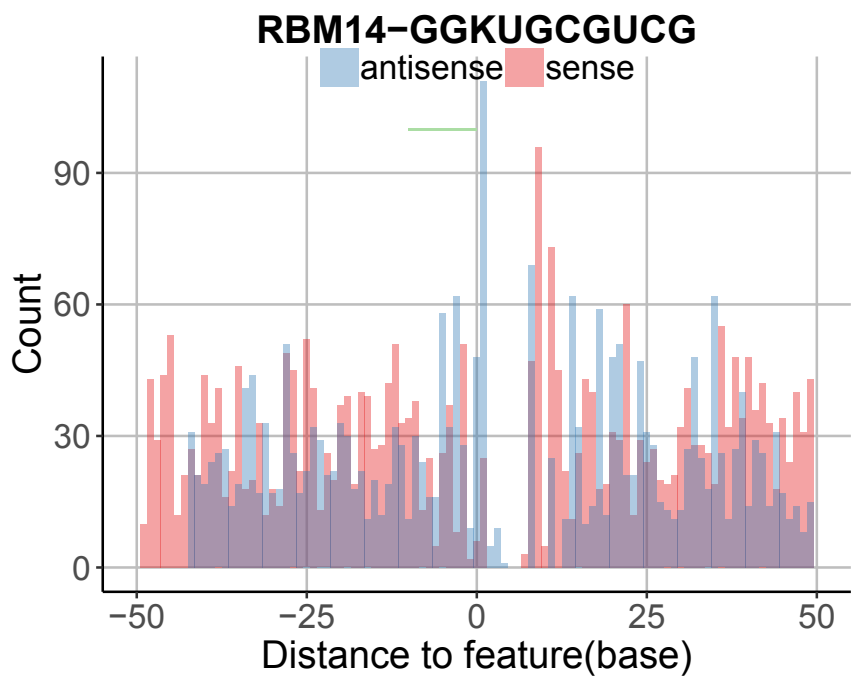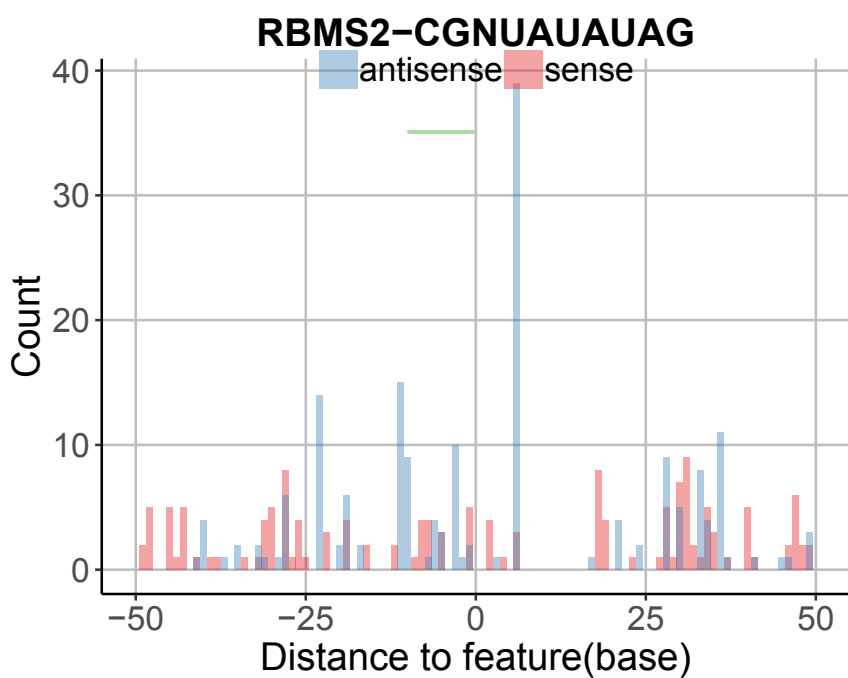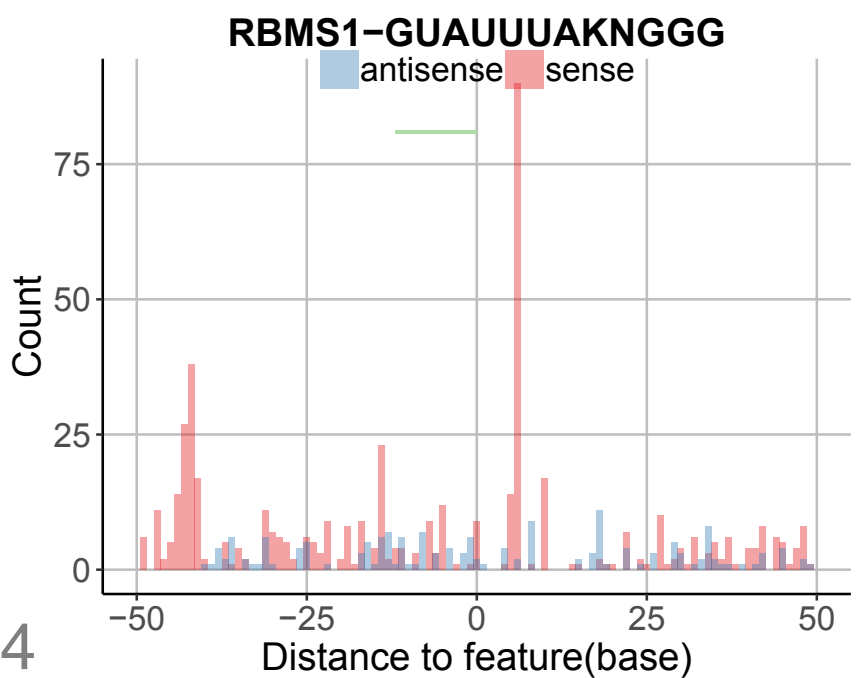

4

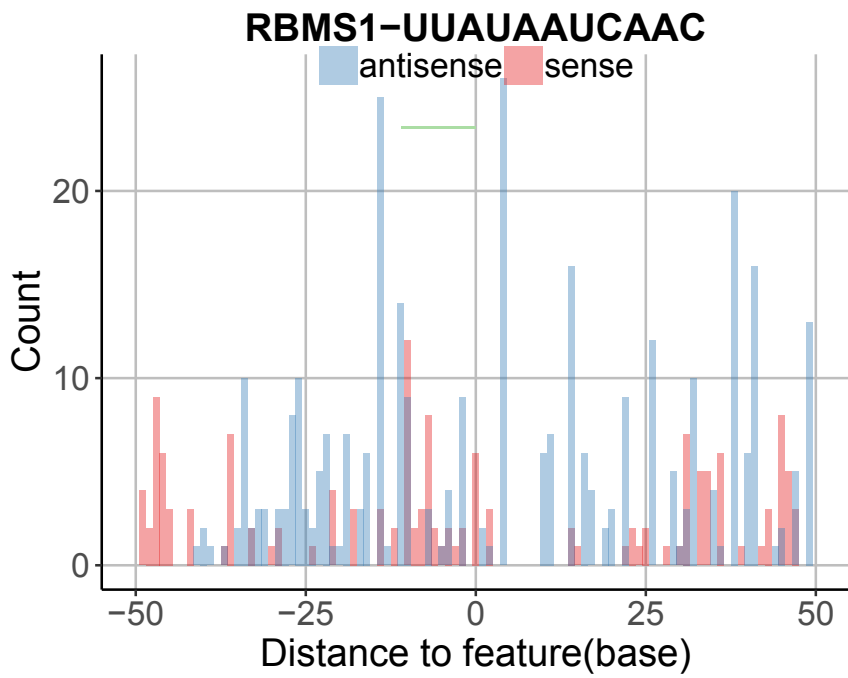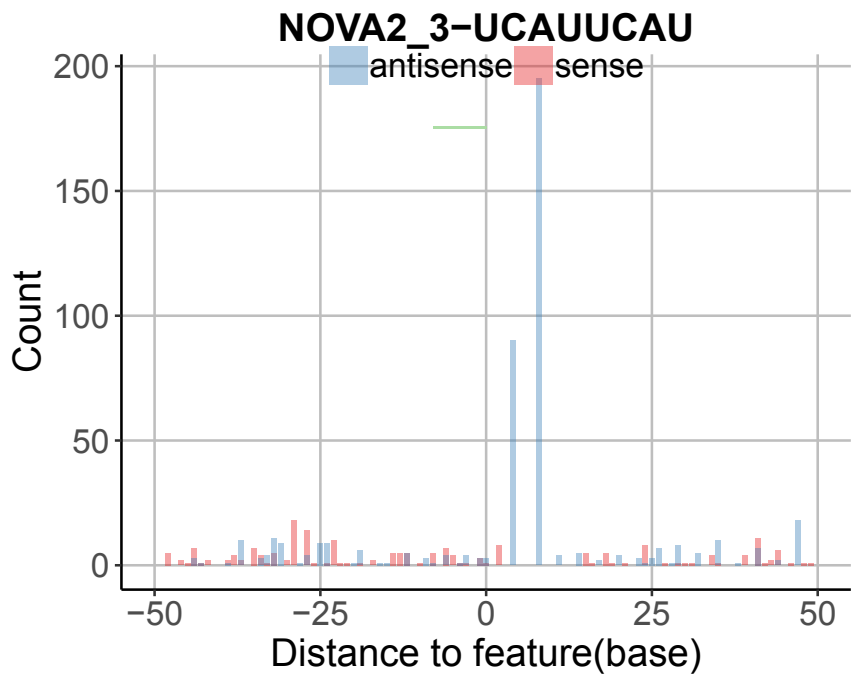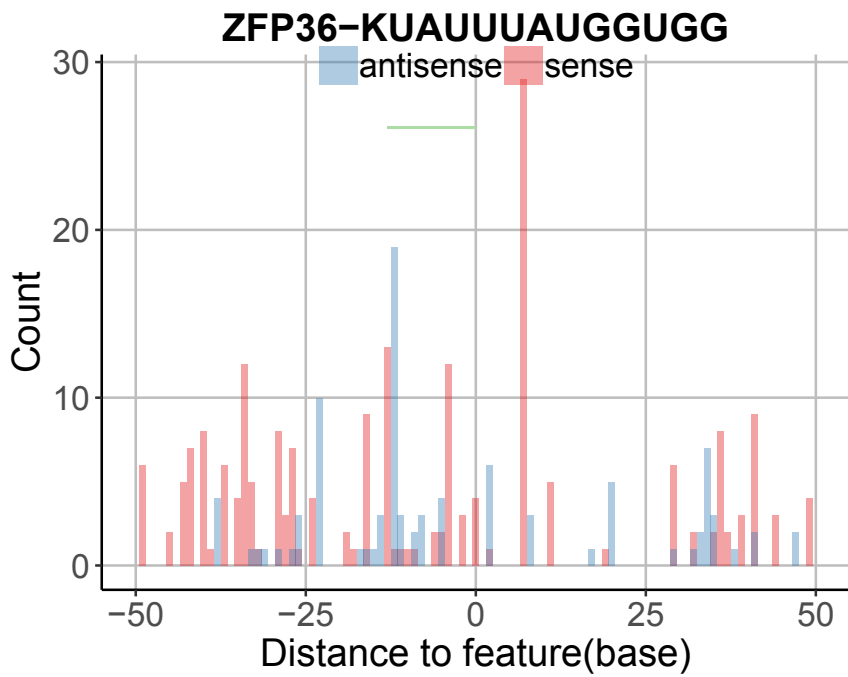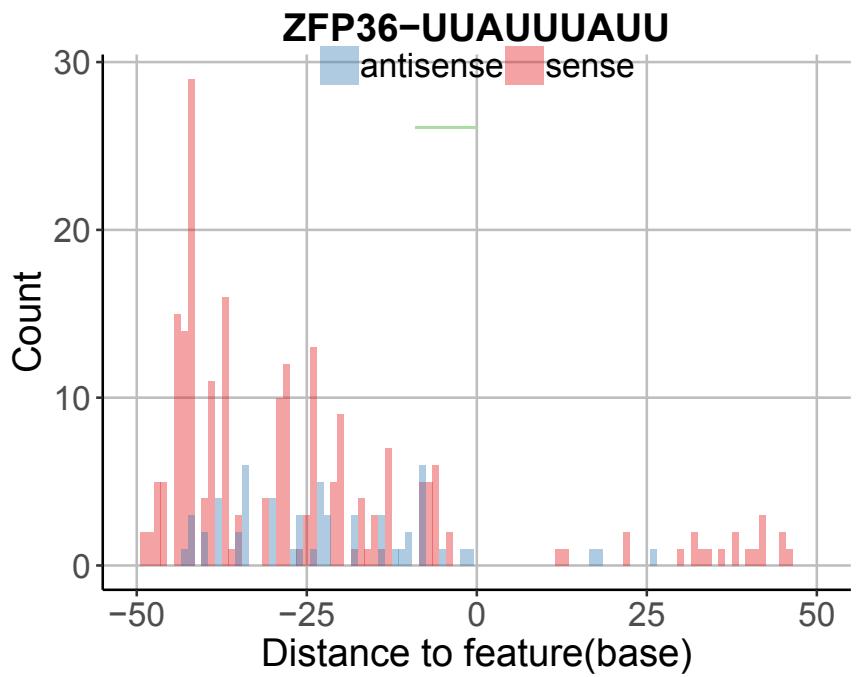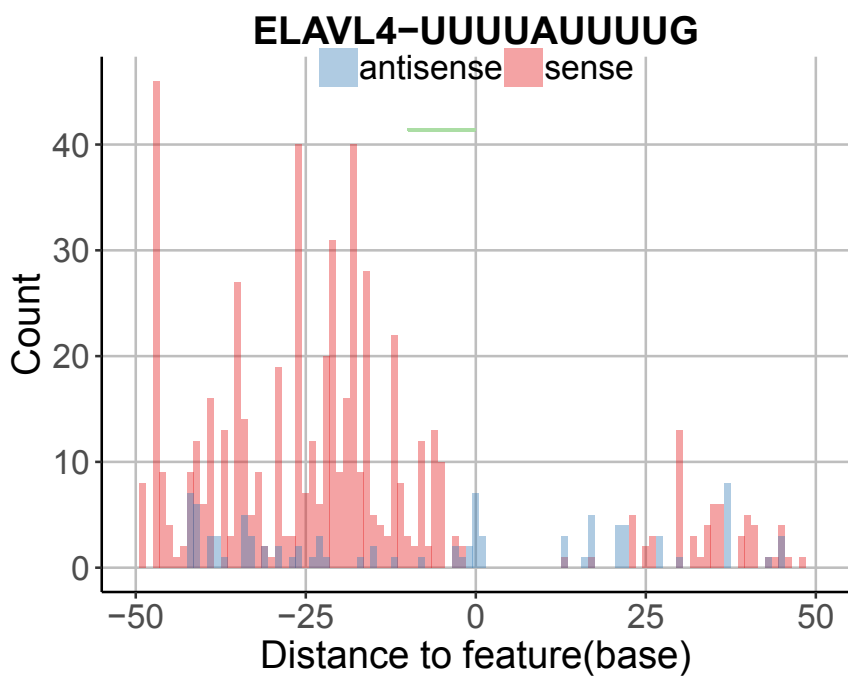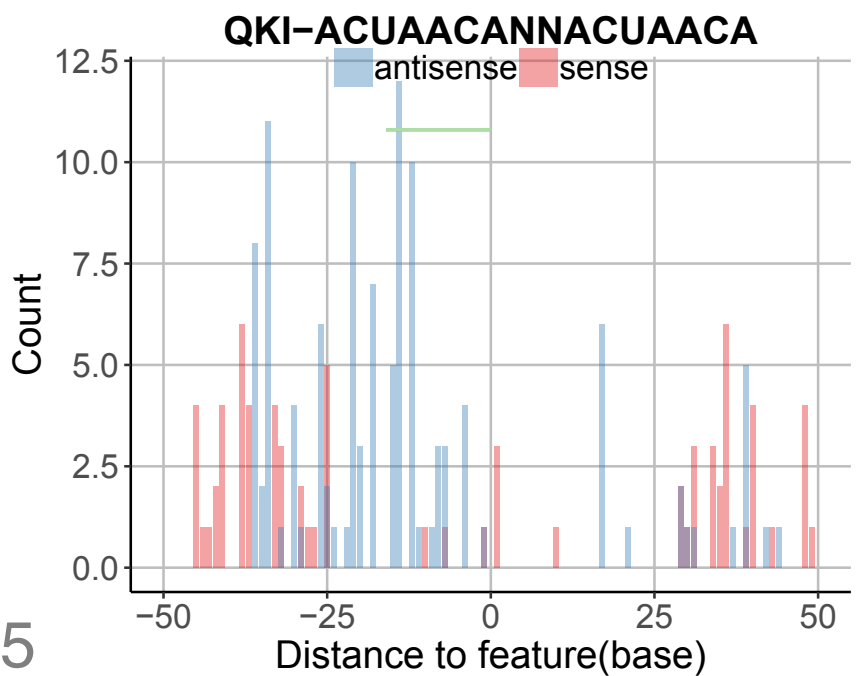

5

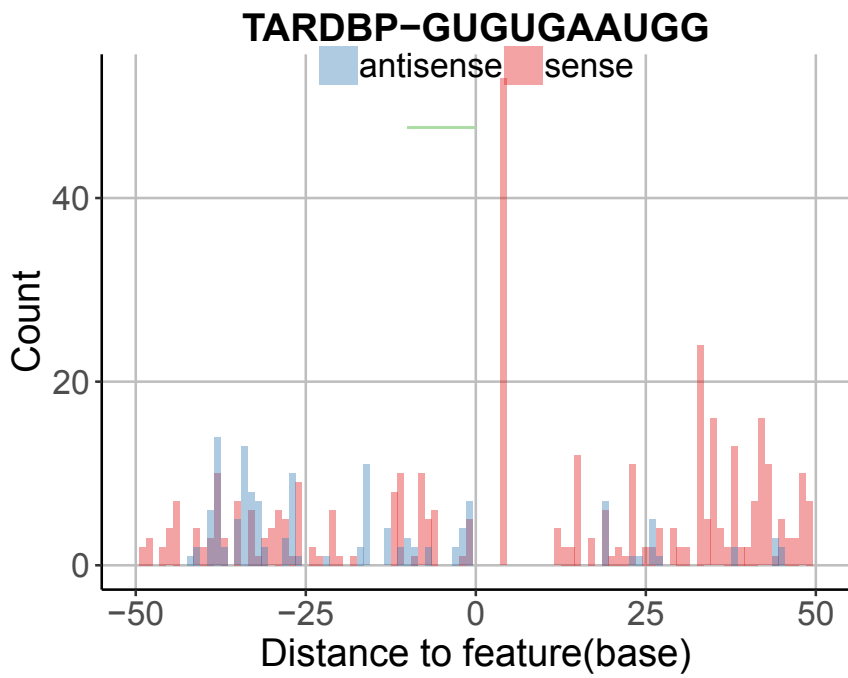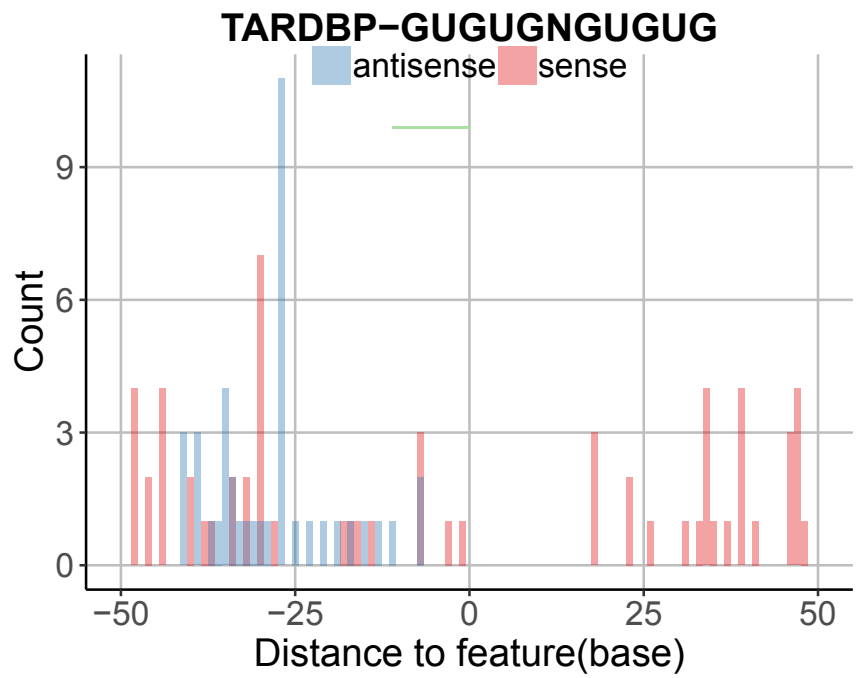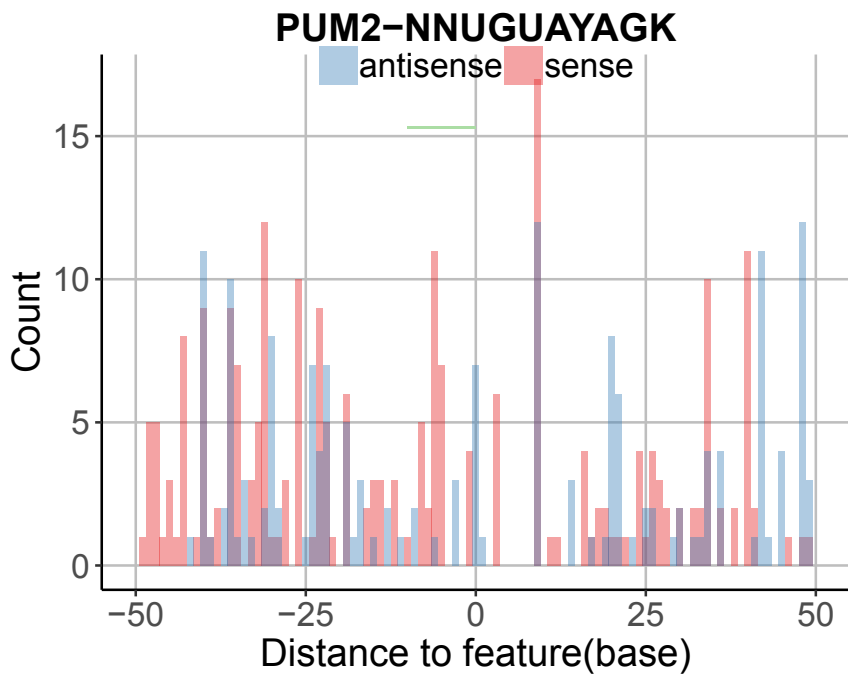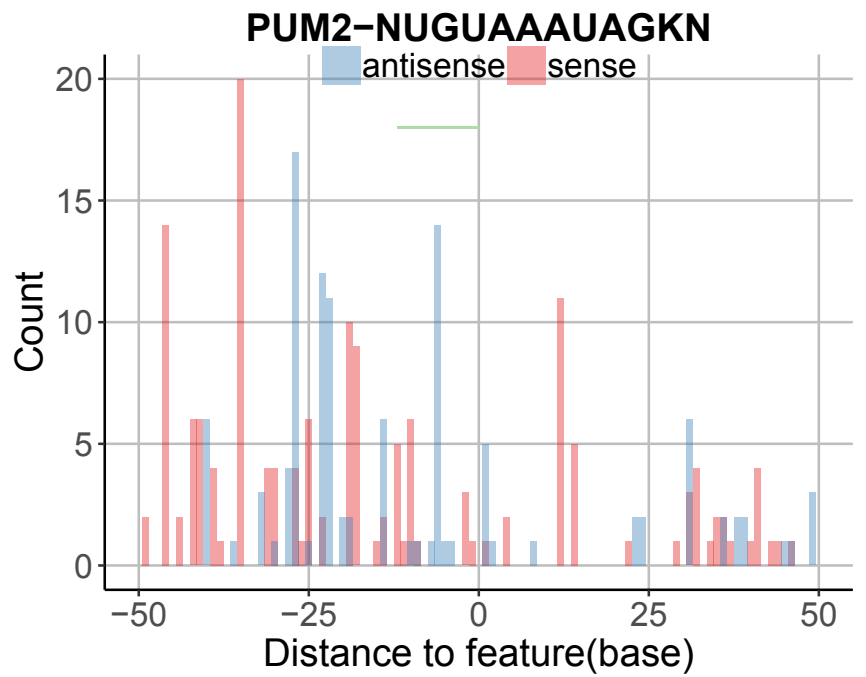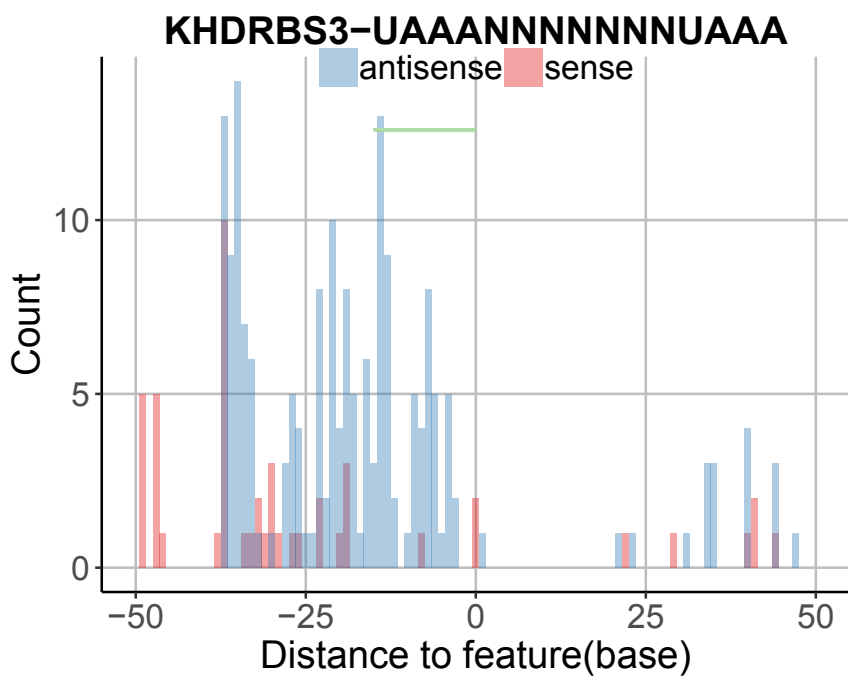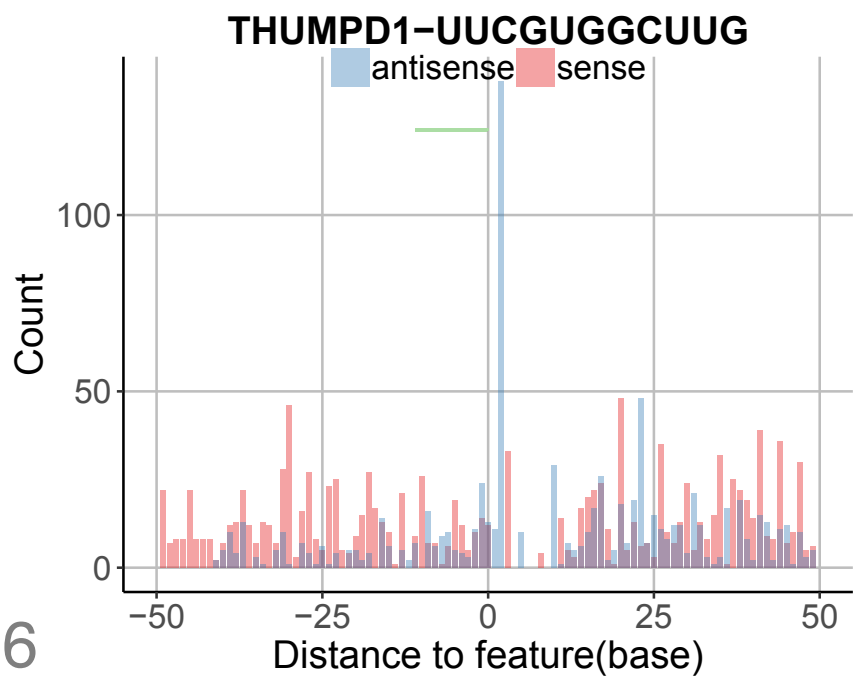

6

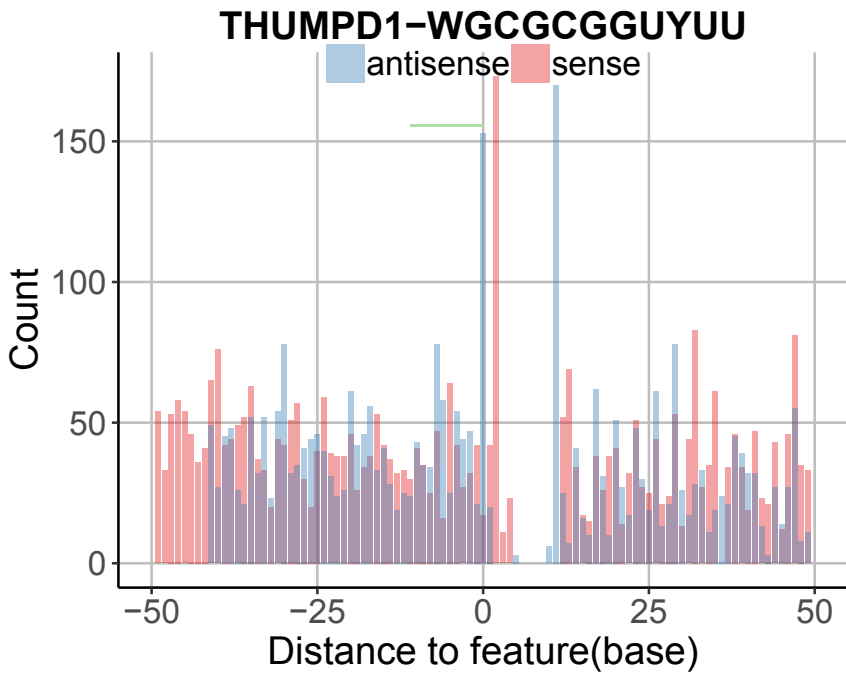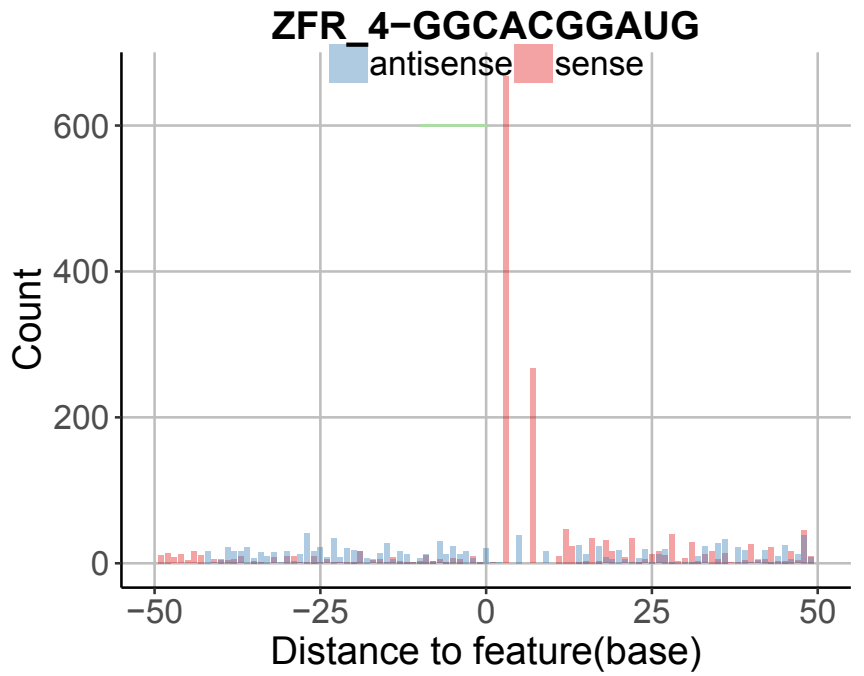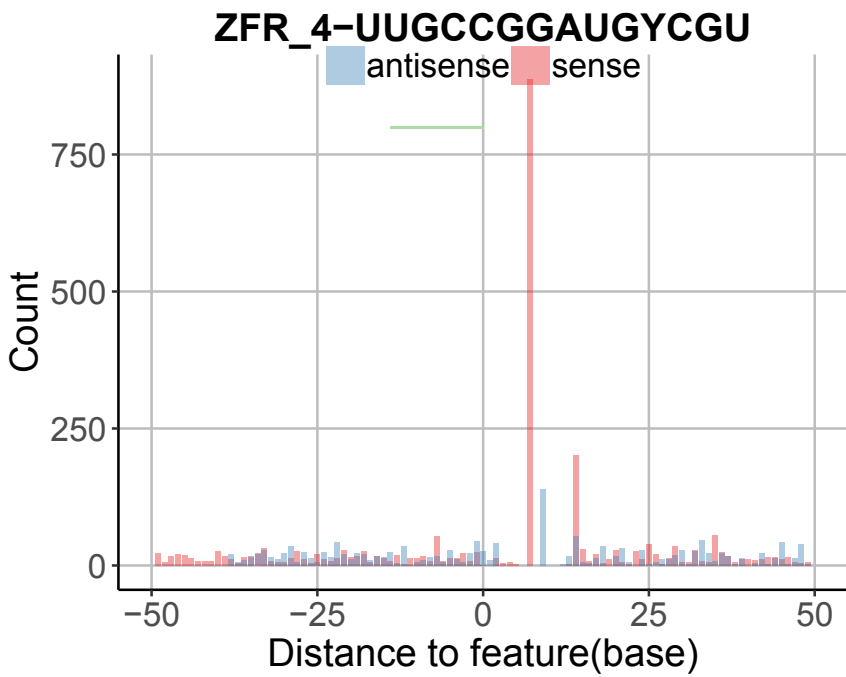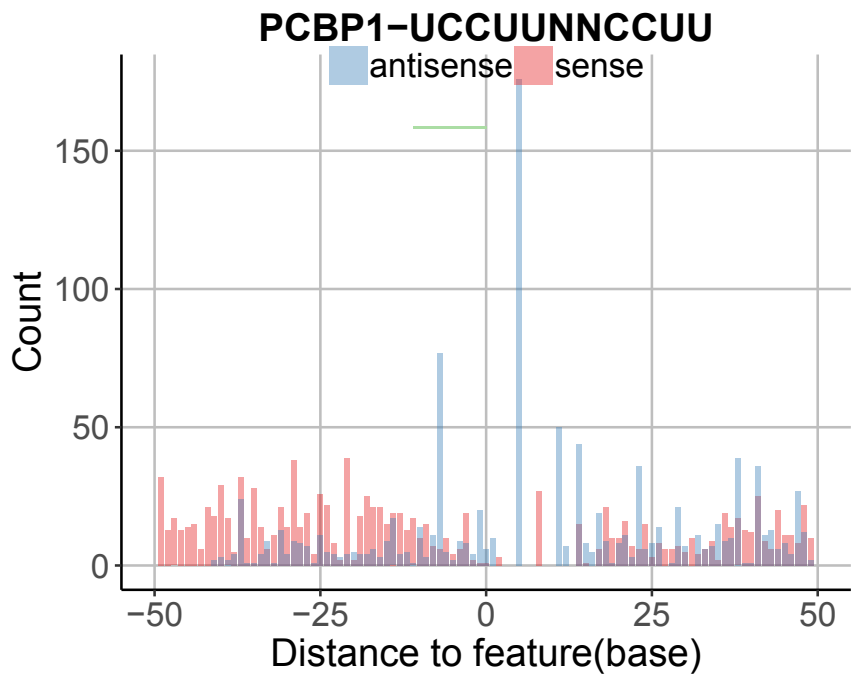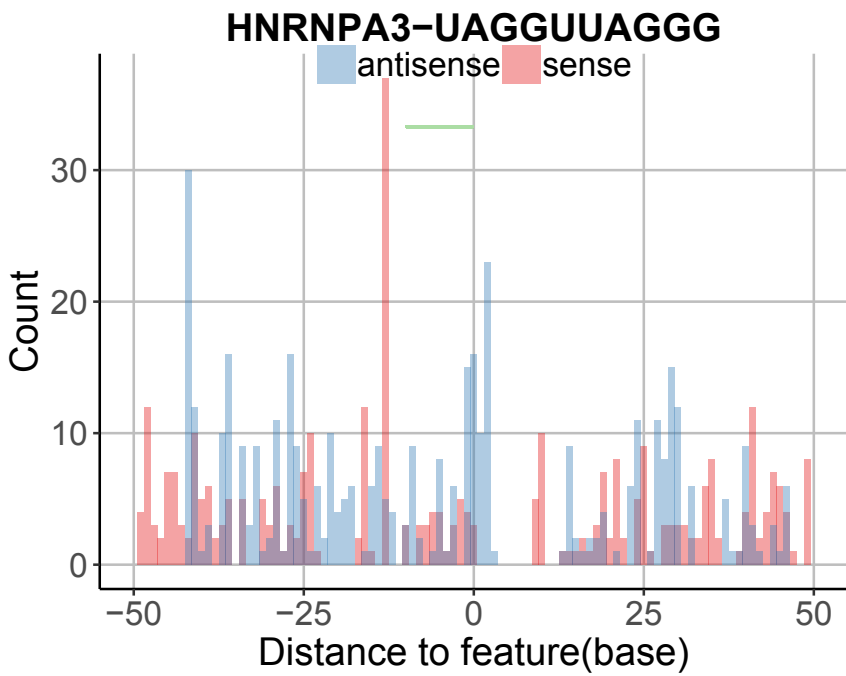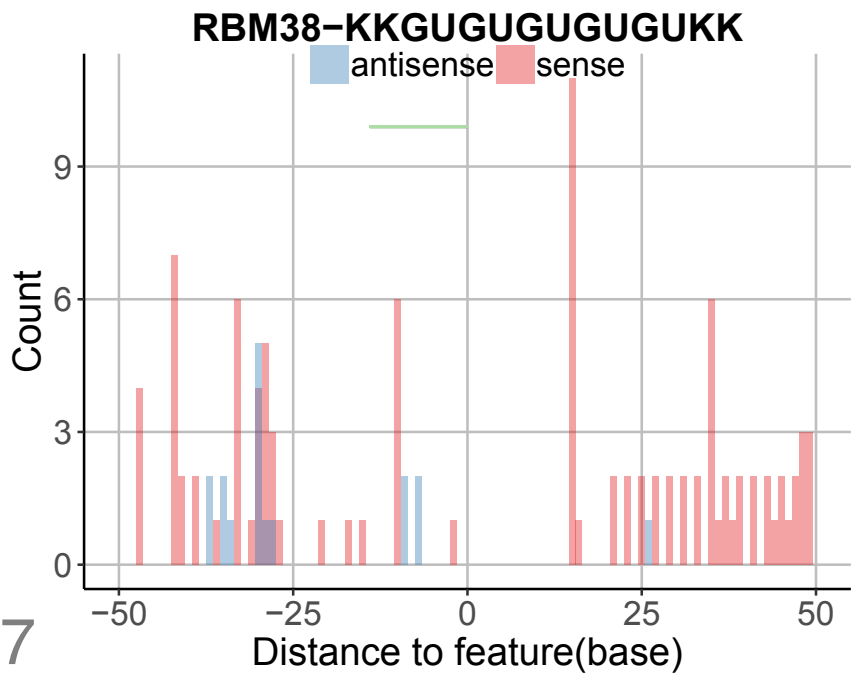

7



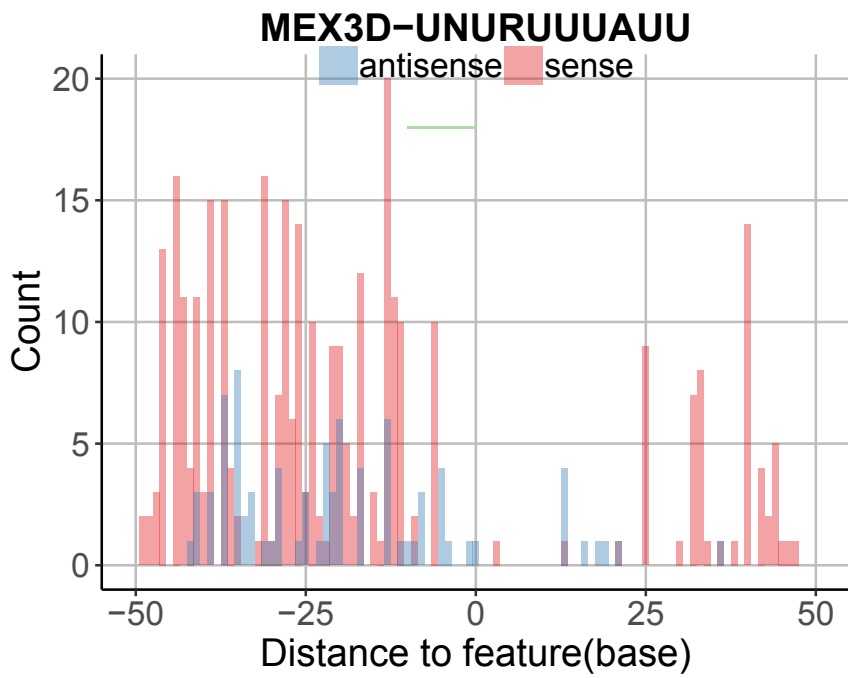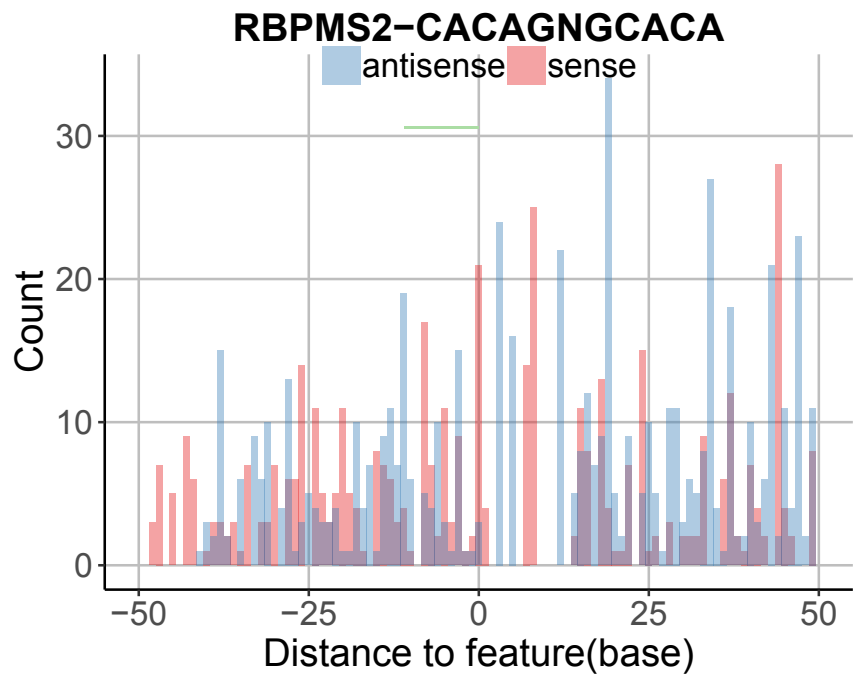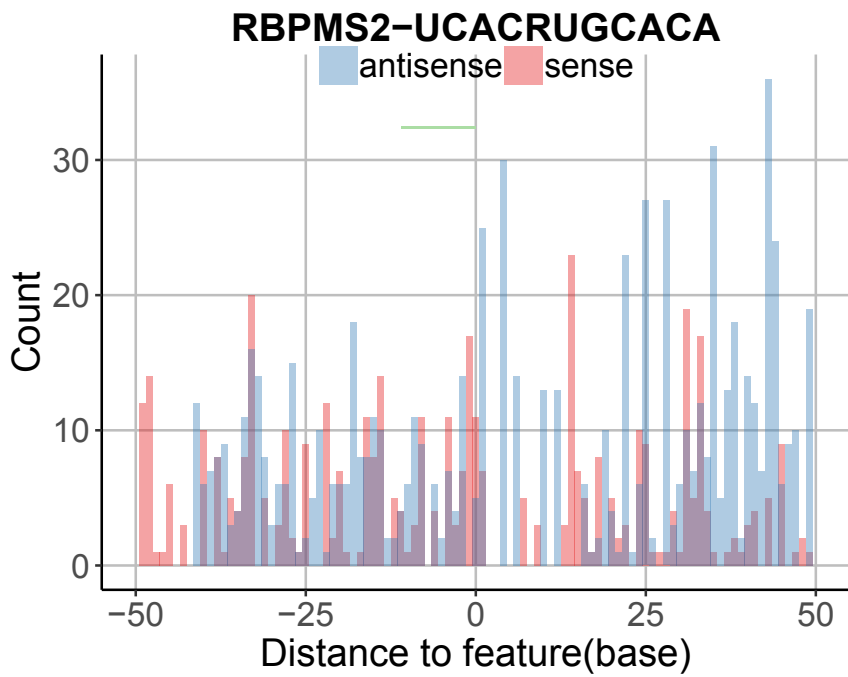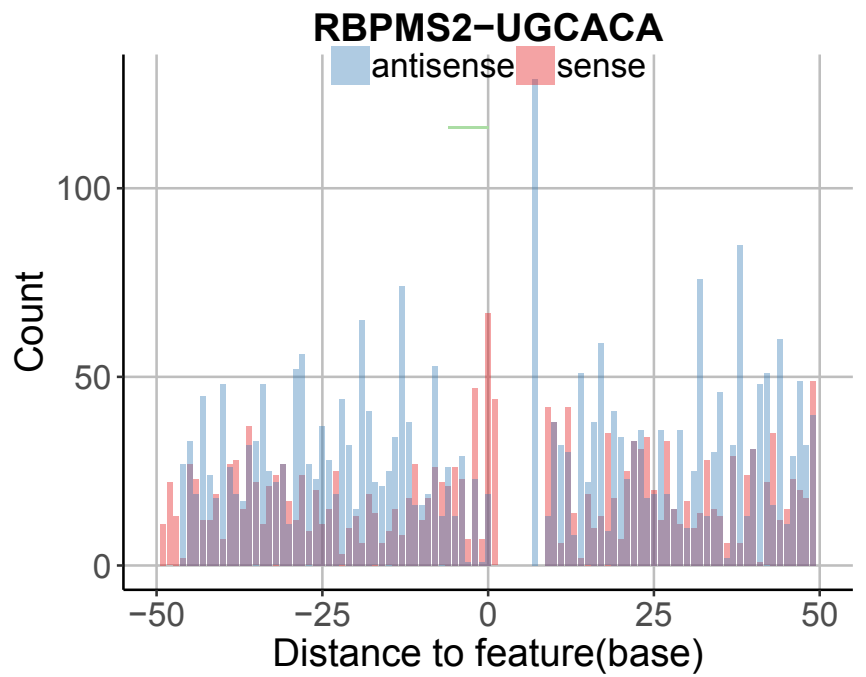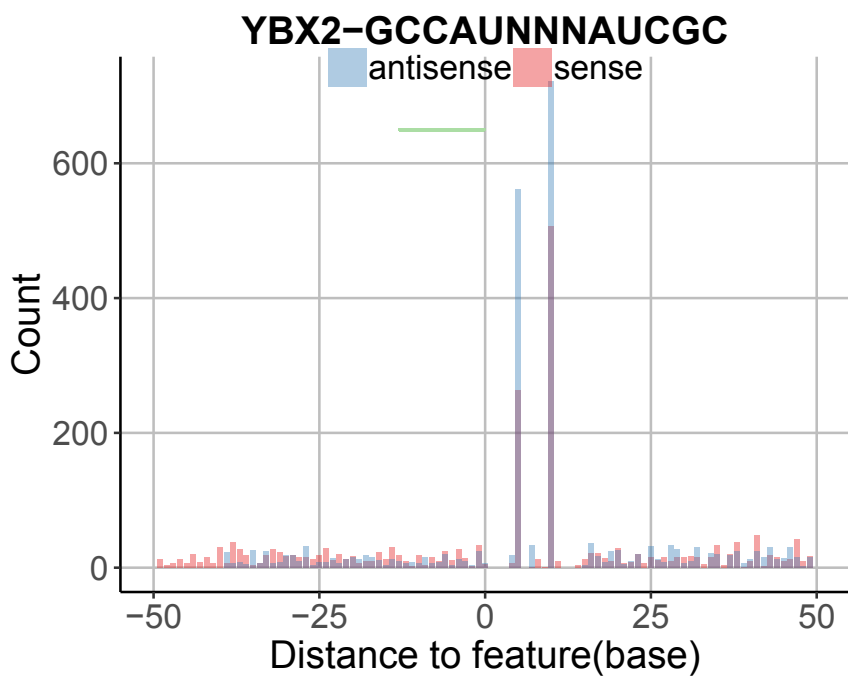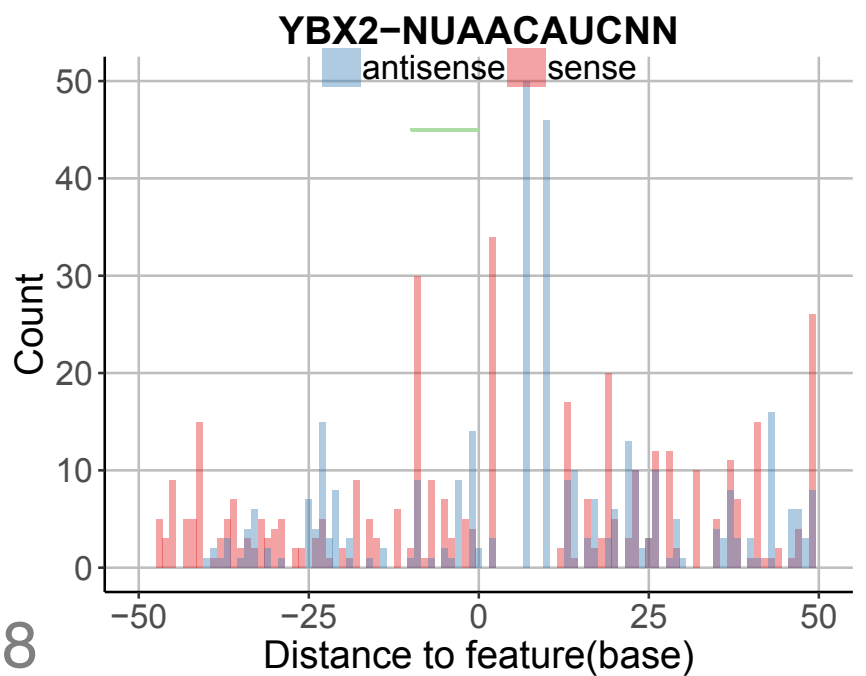

8

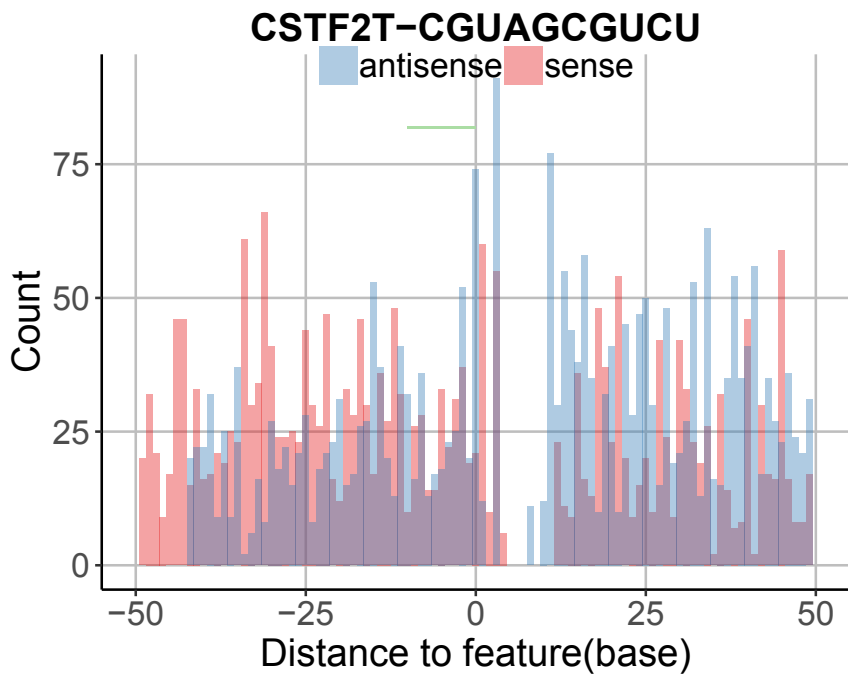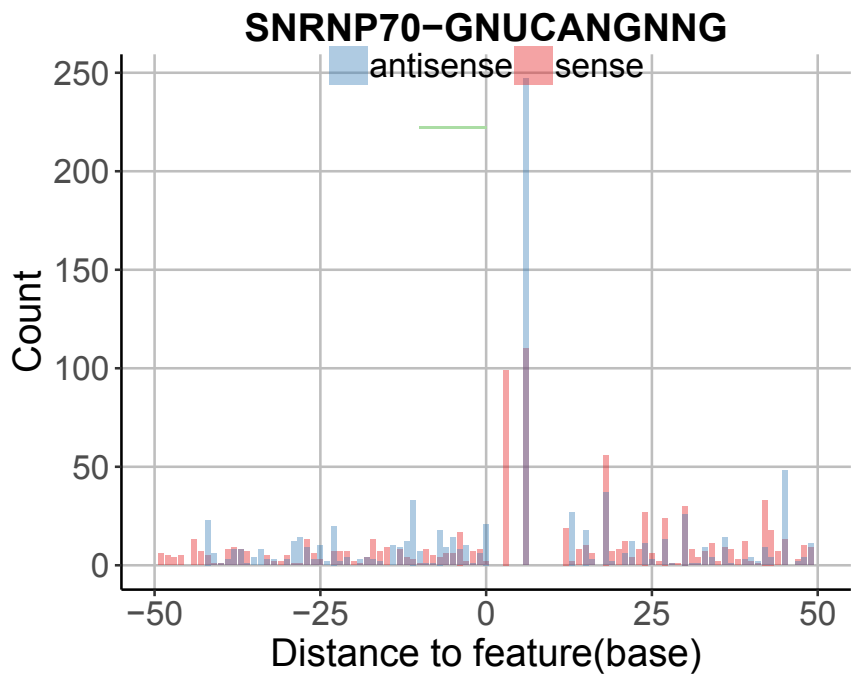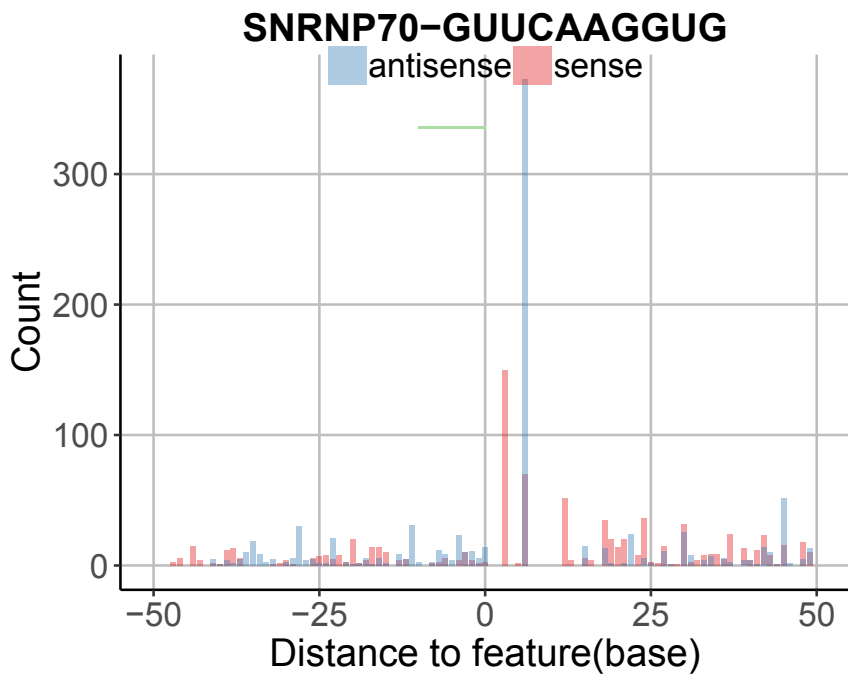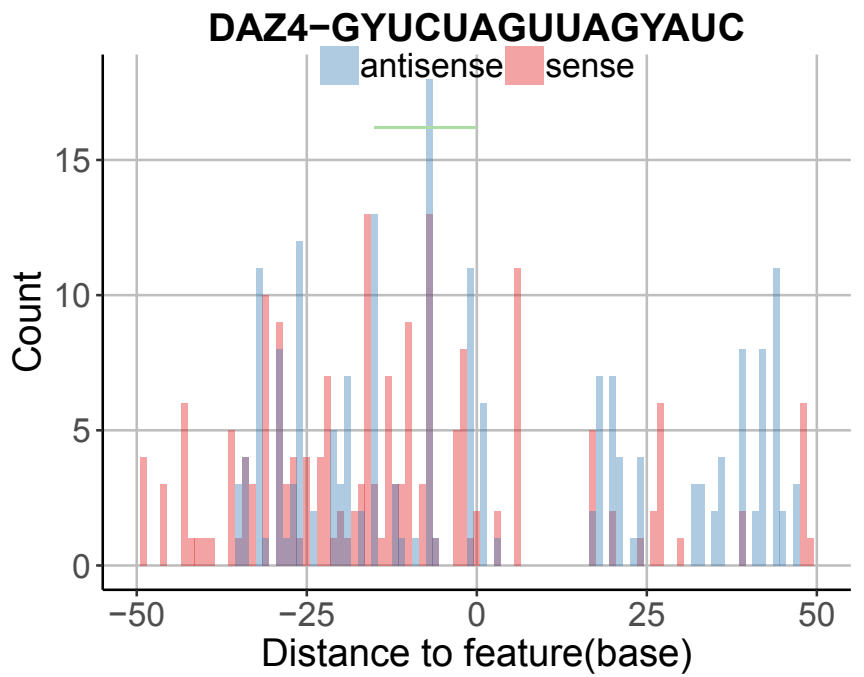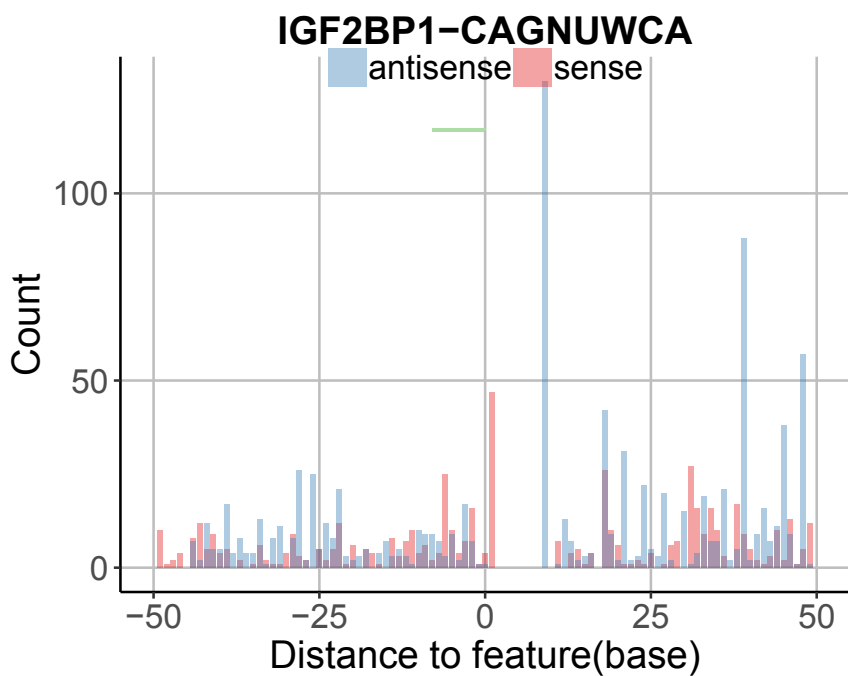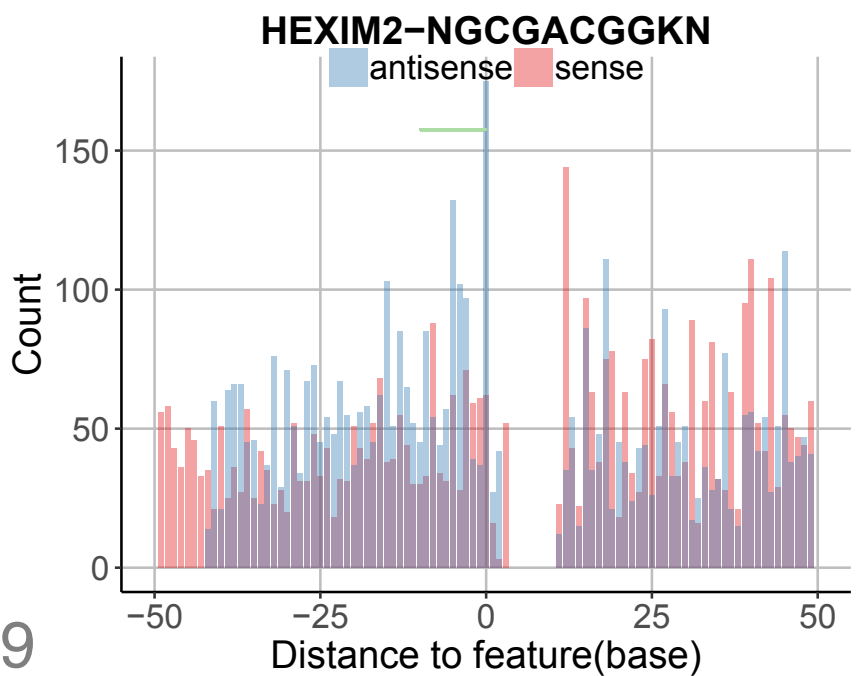

9

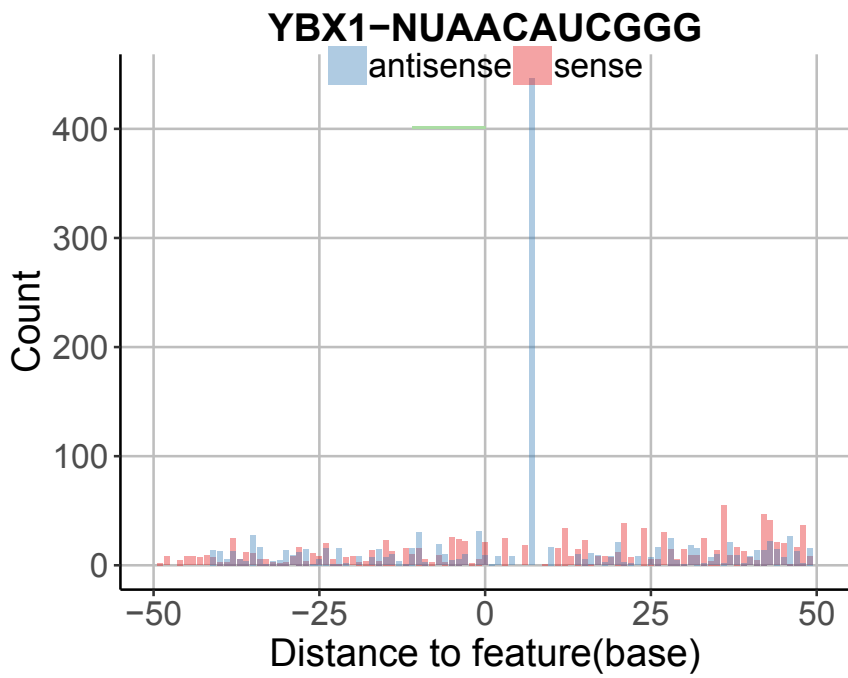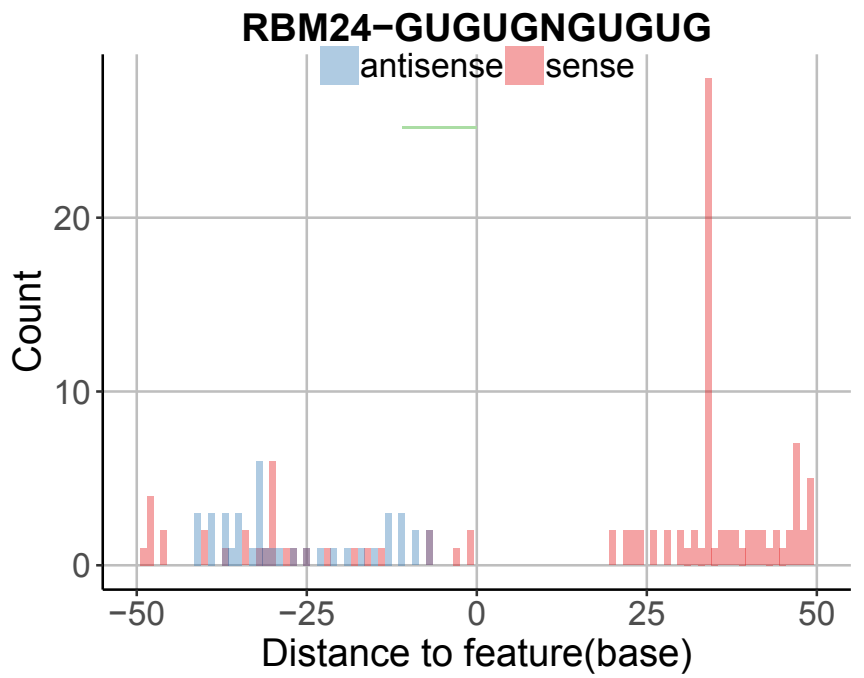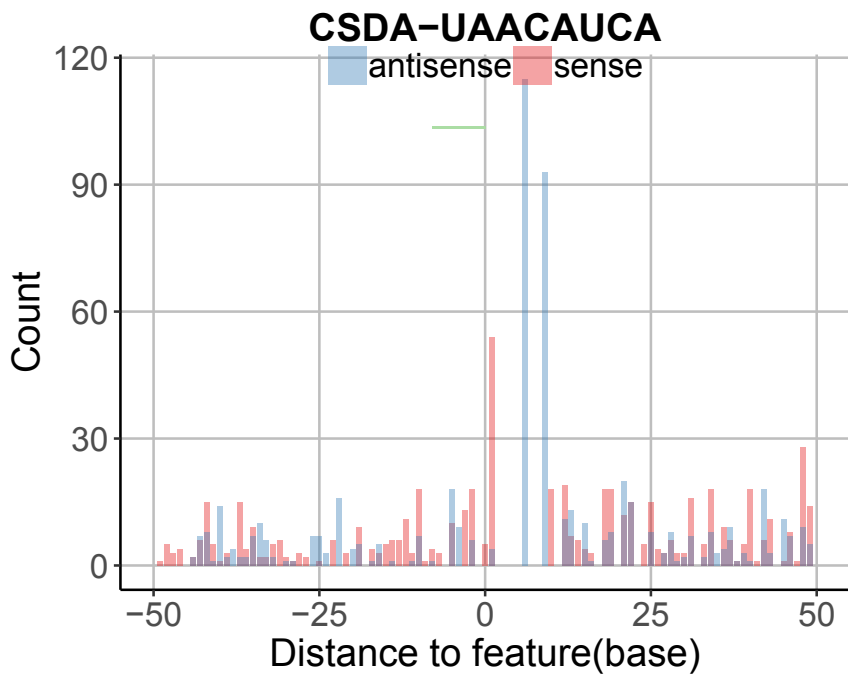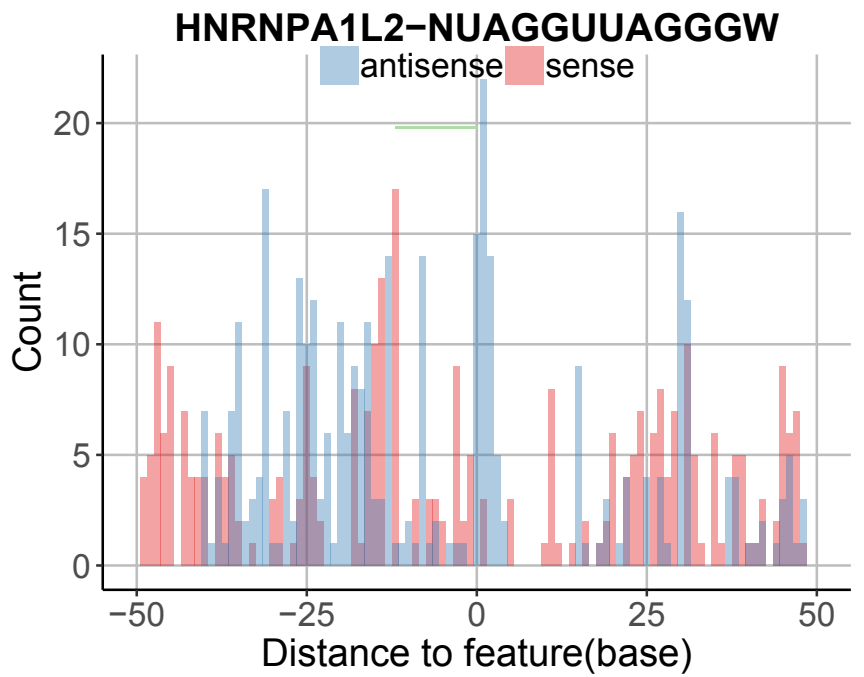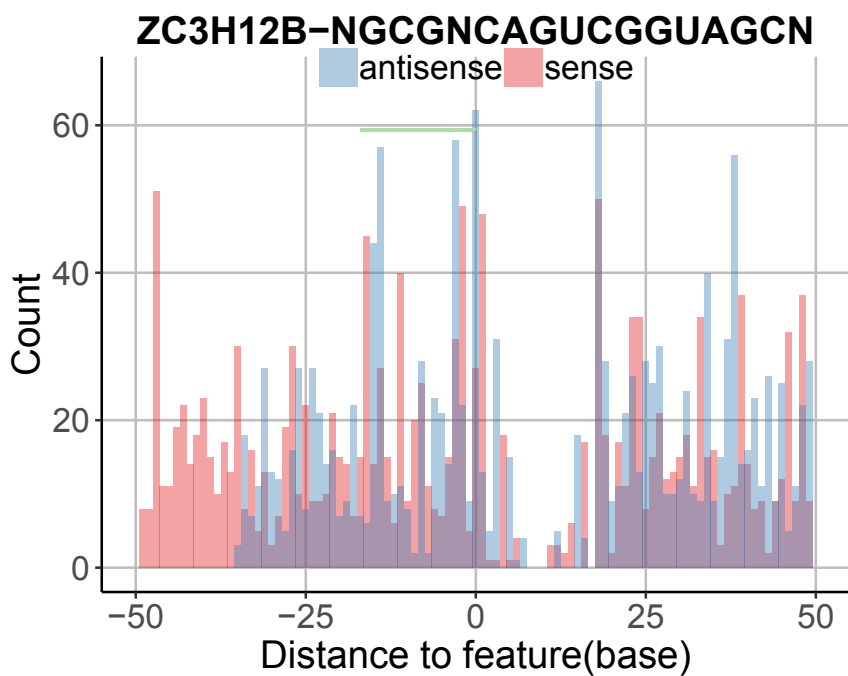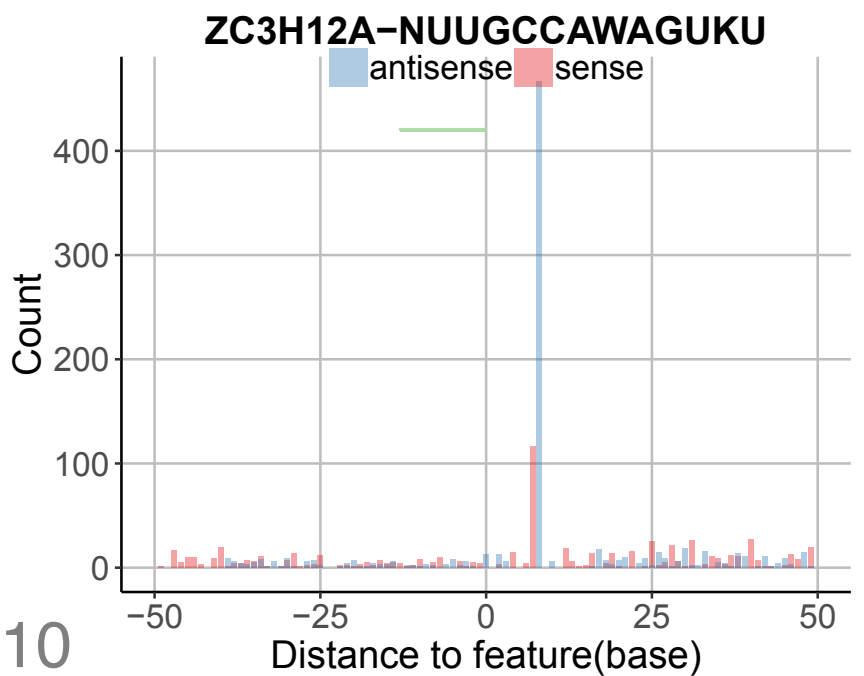

10

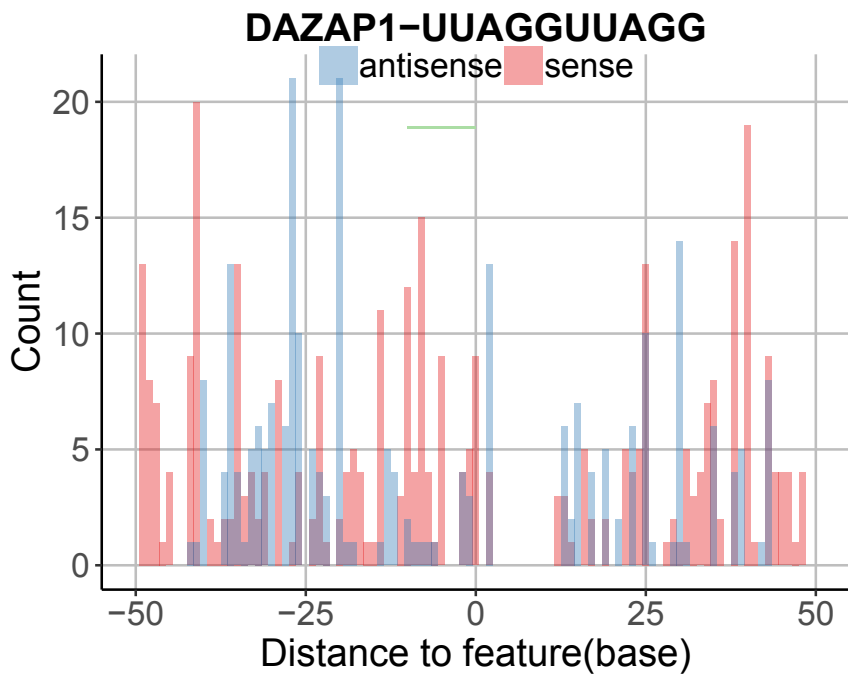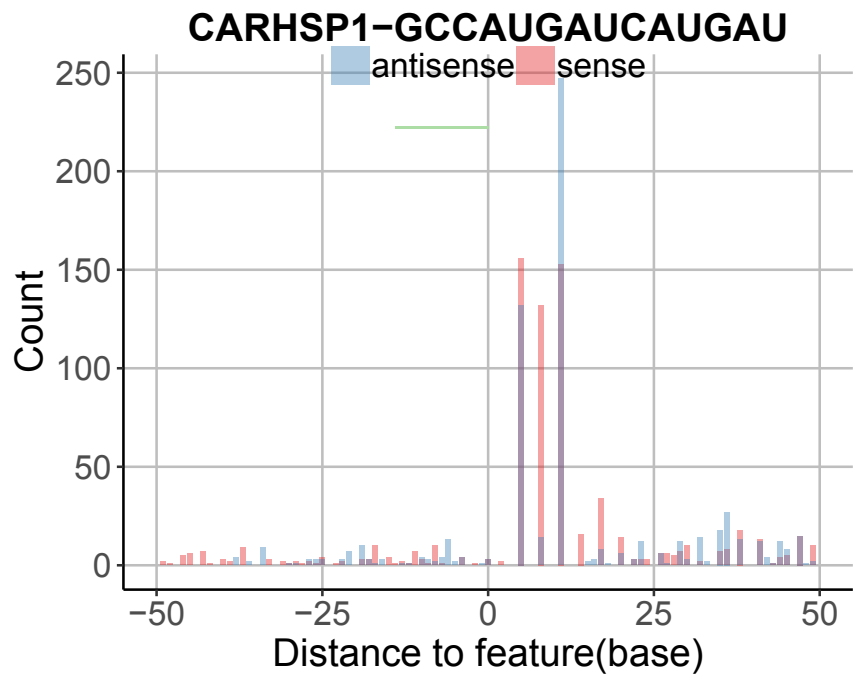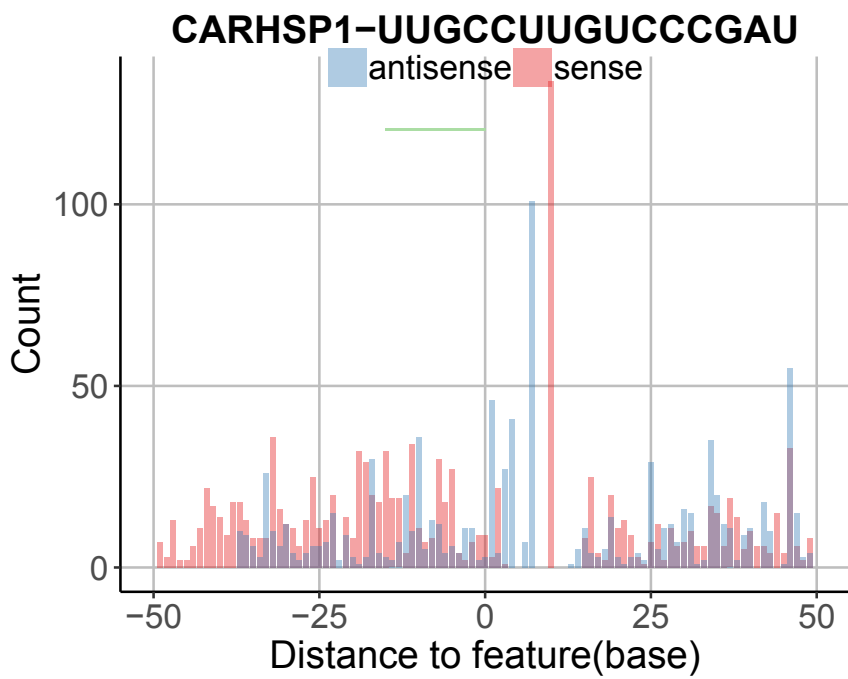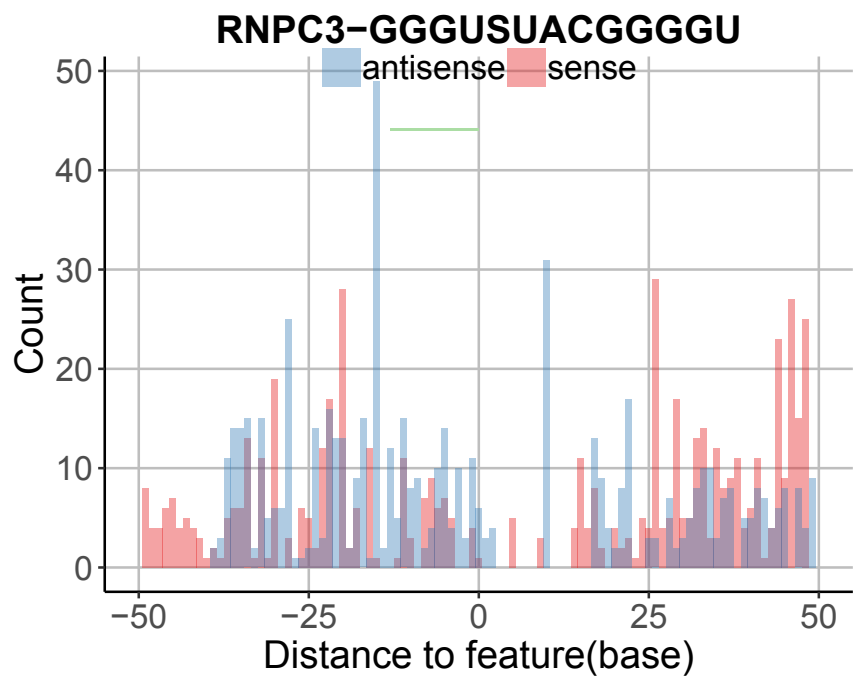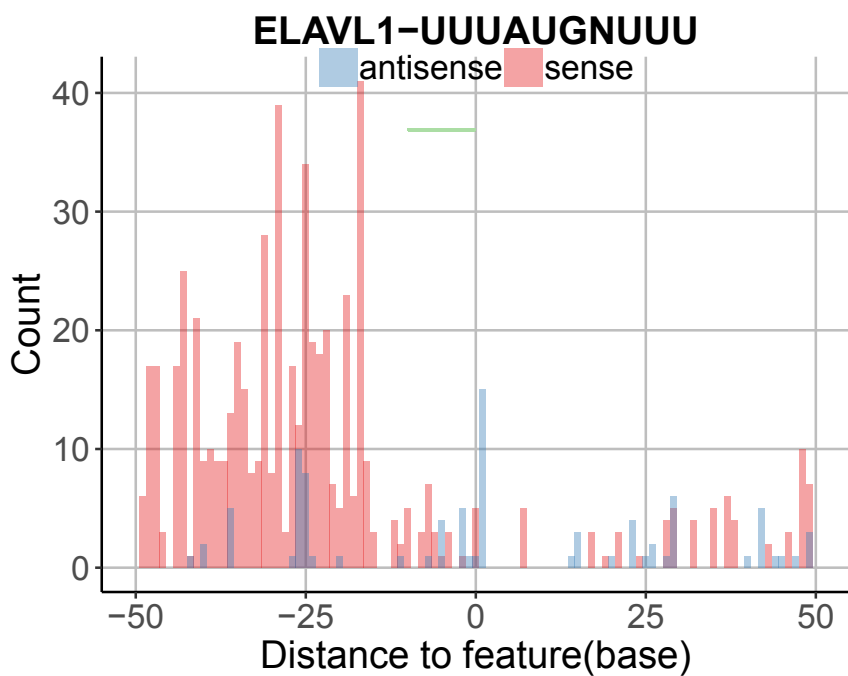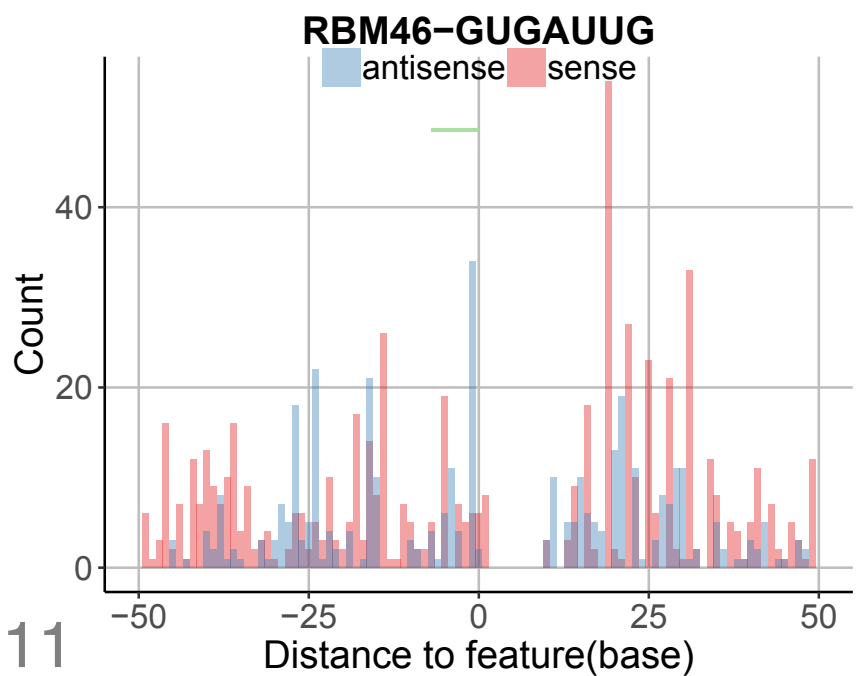

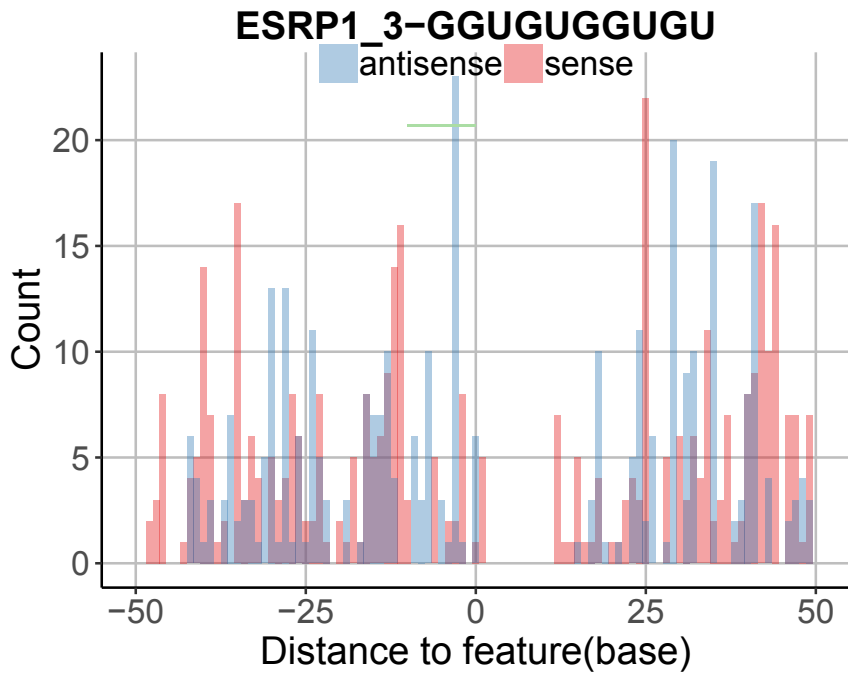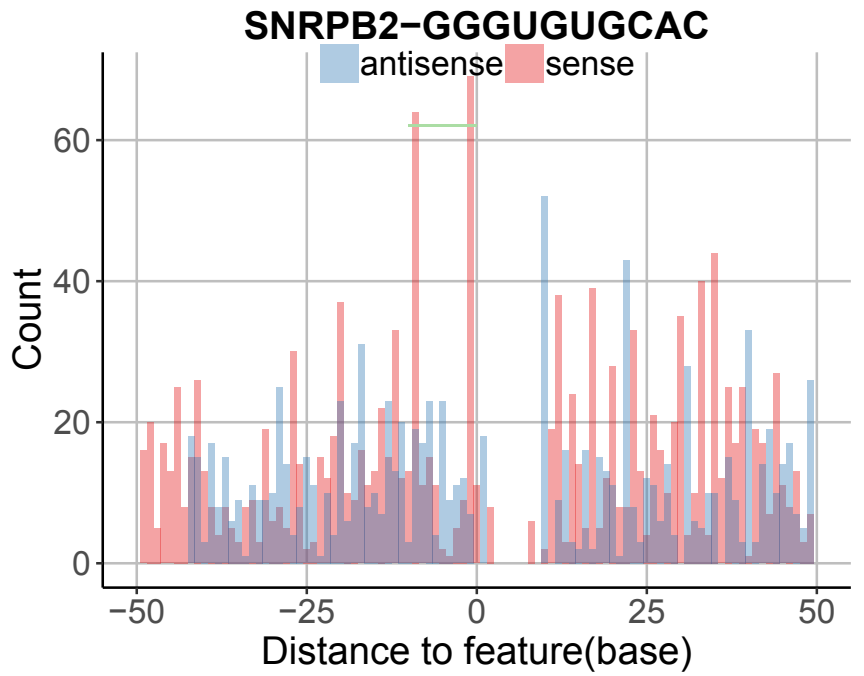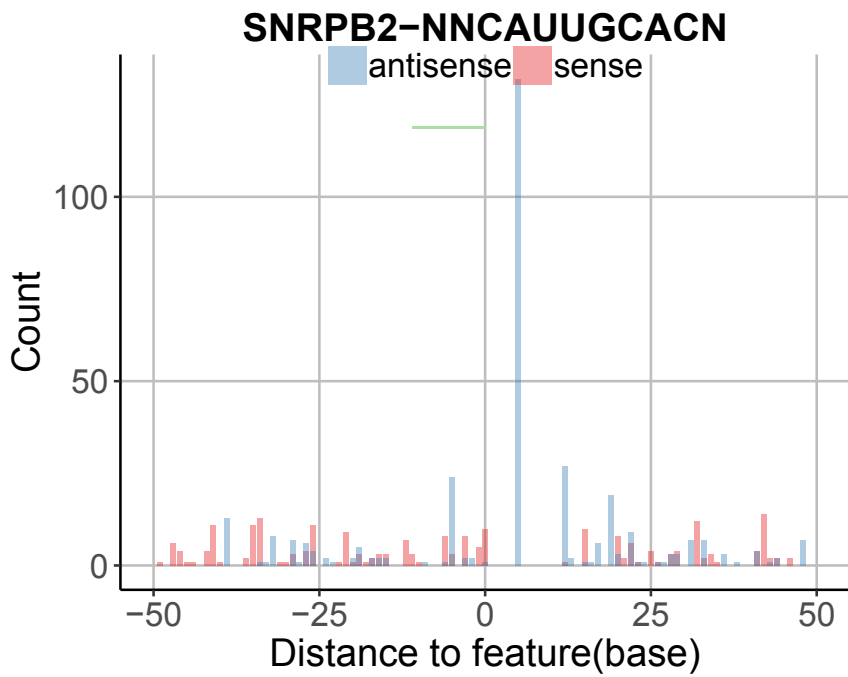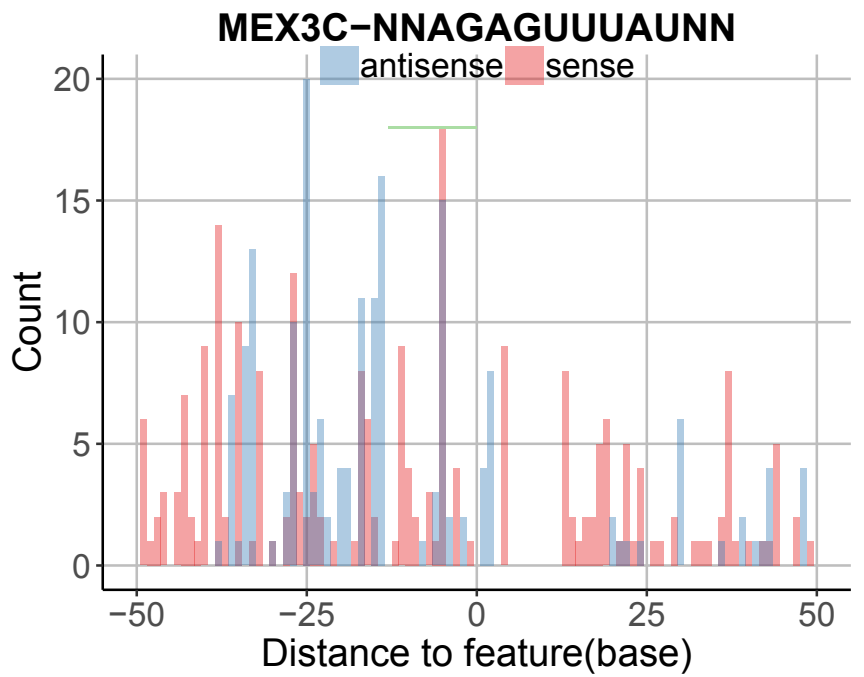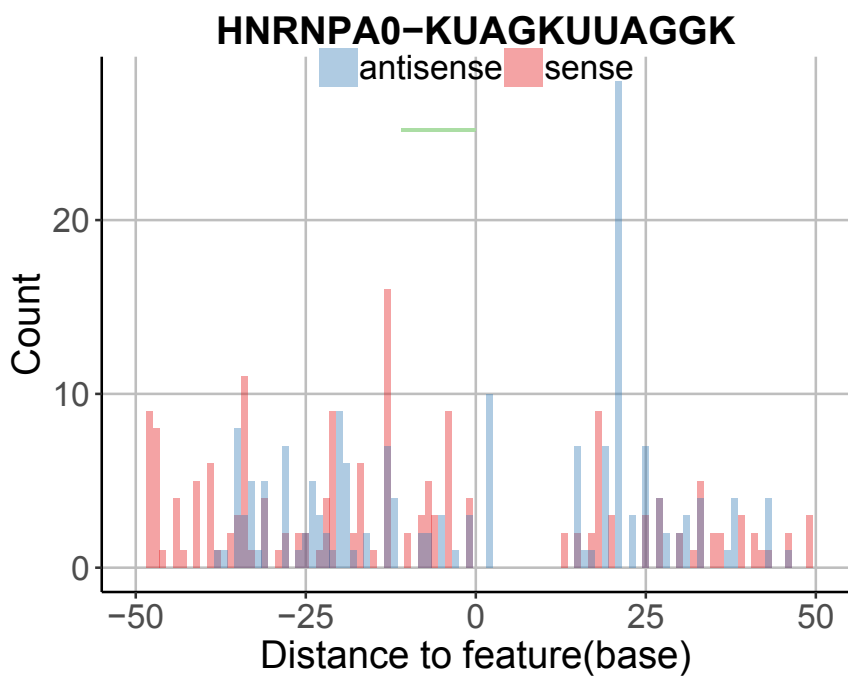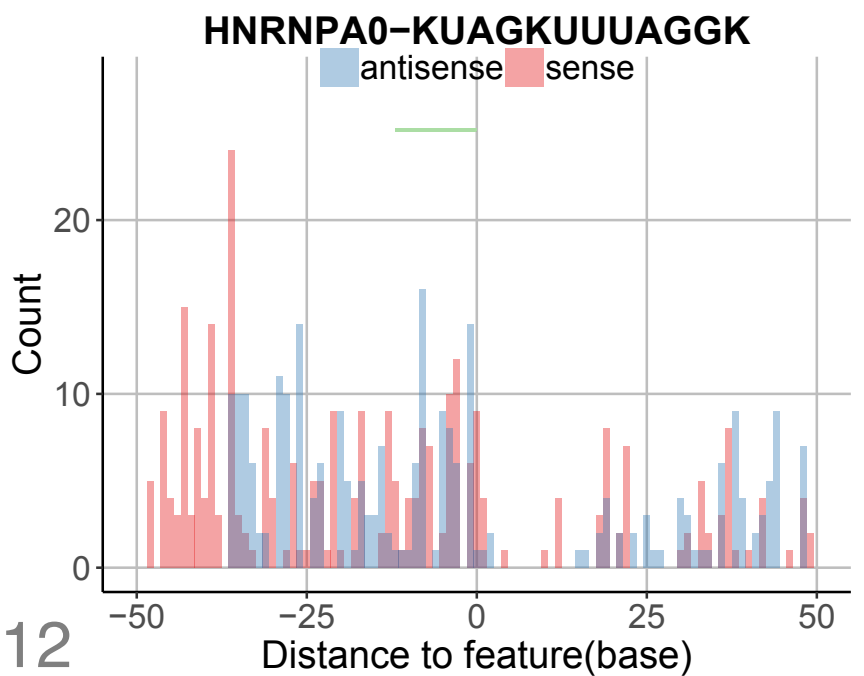

12

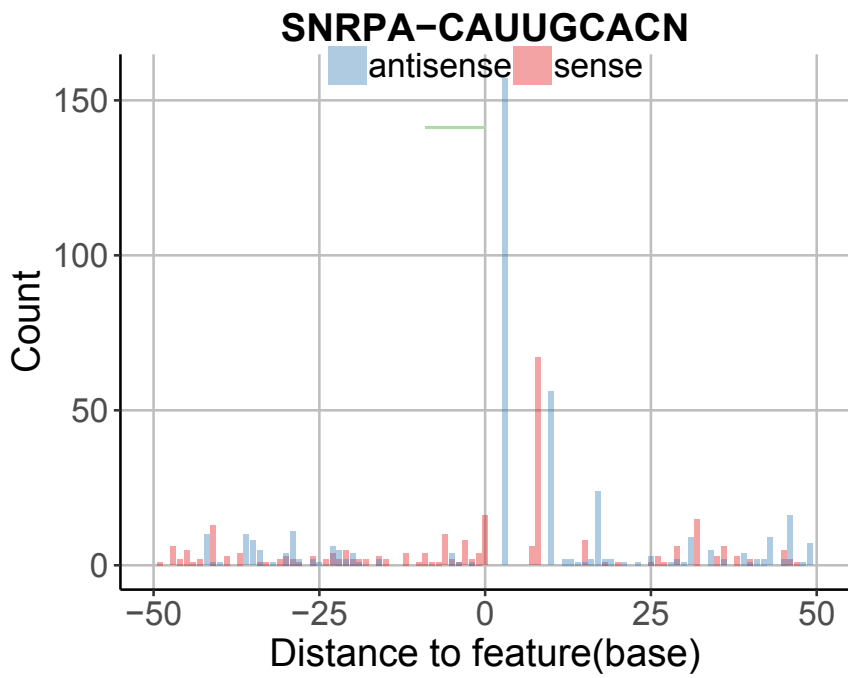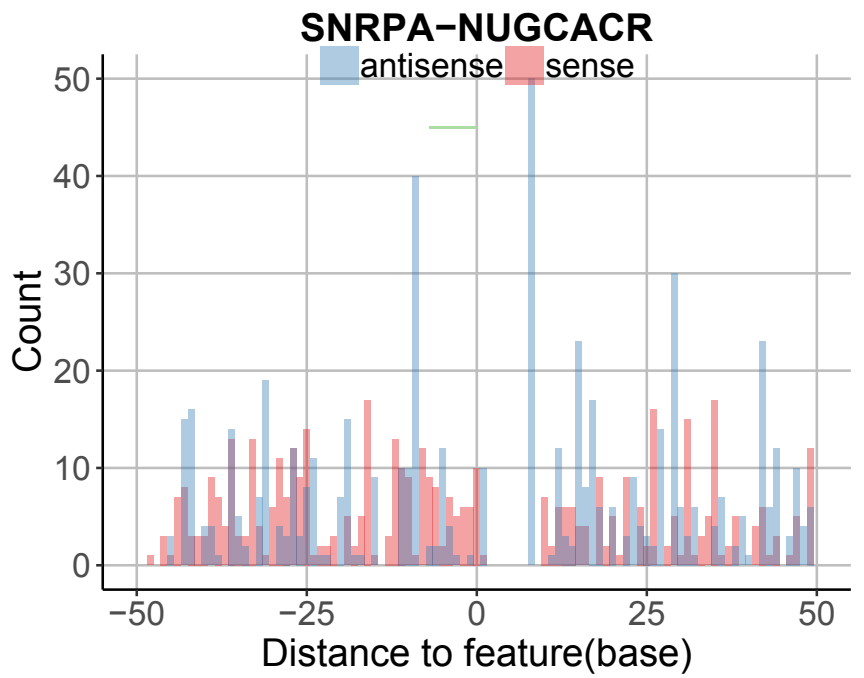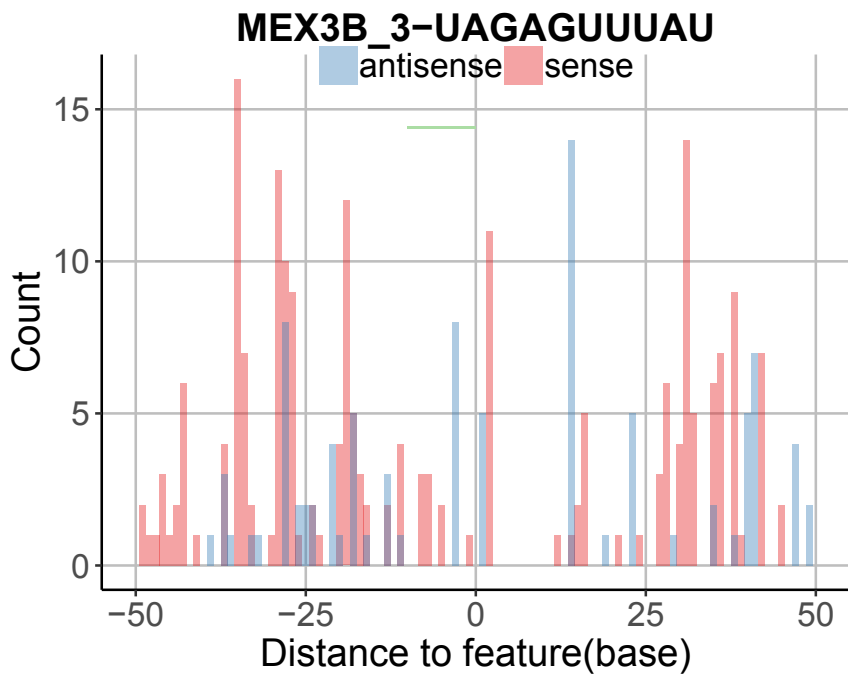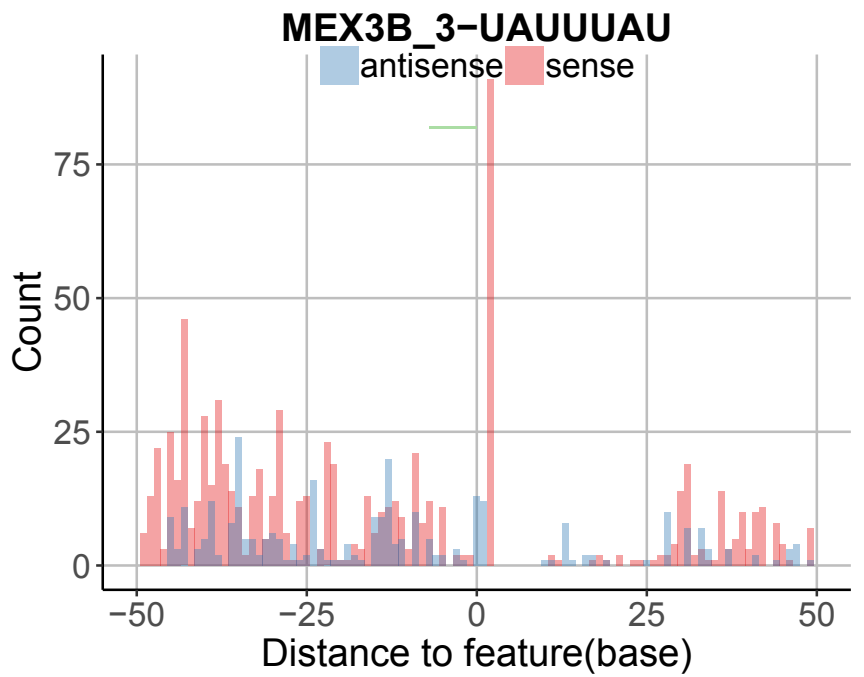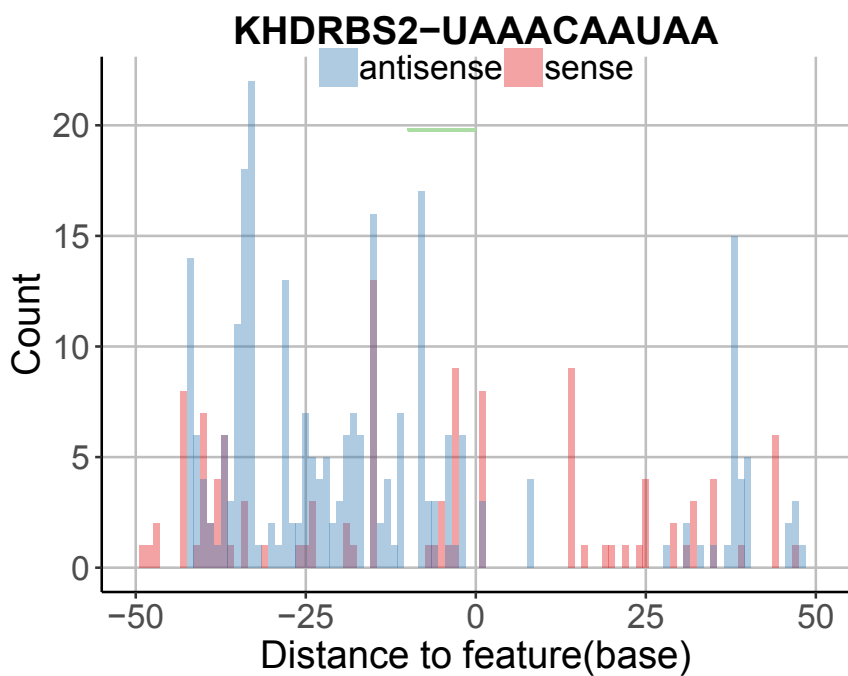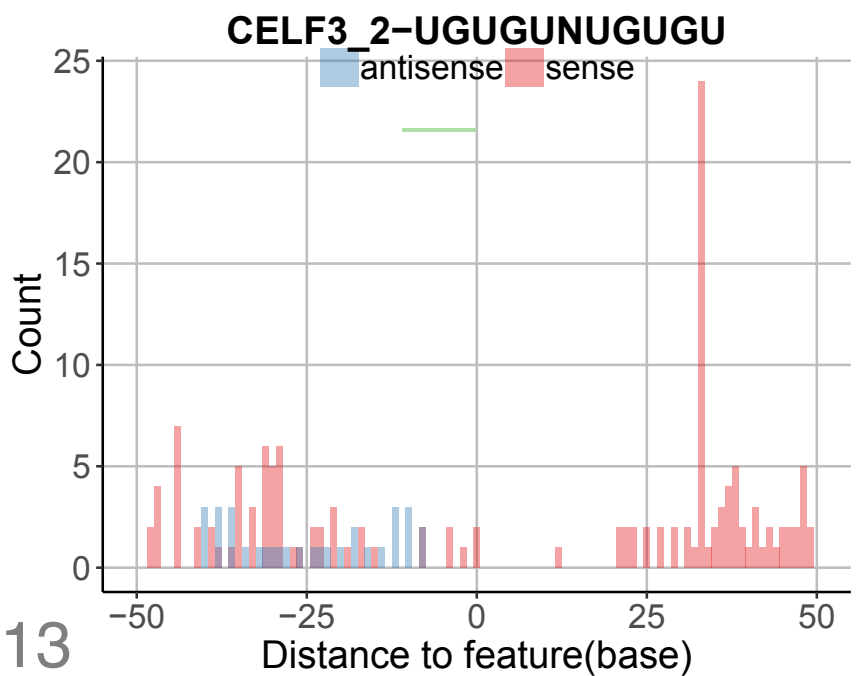

**RNPC3-GGGDDGGGDKUACKKGGK**

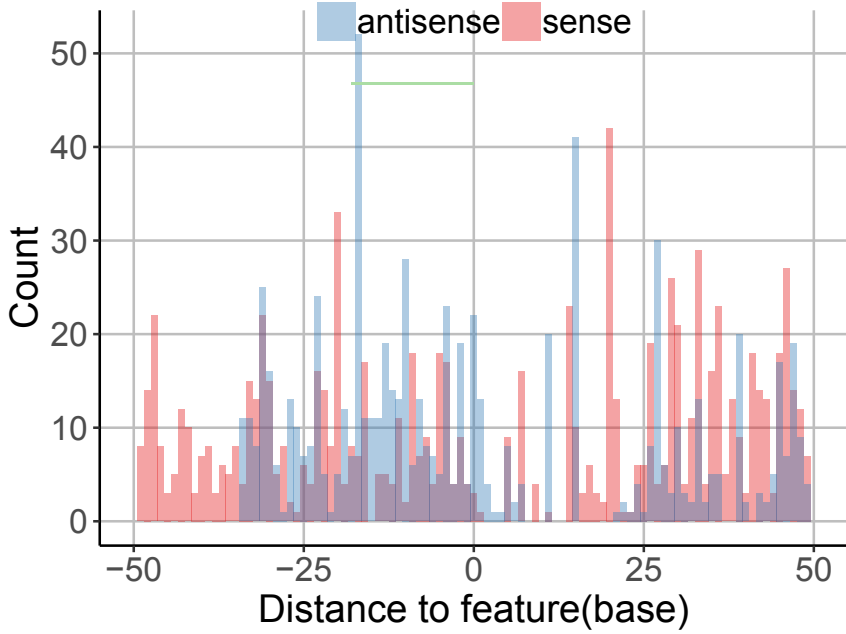

**RBM14-UGCGUCG**

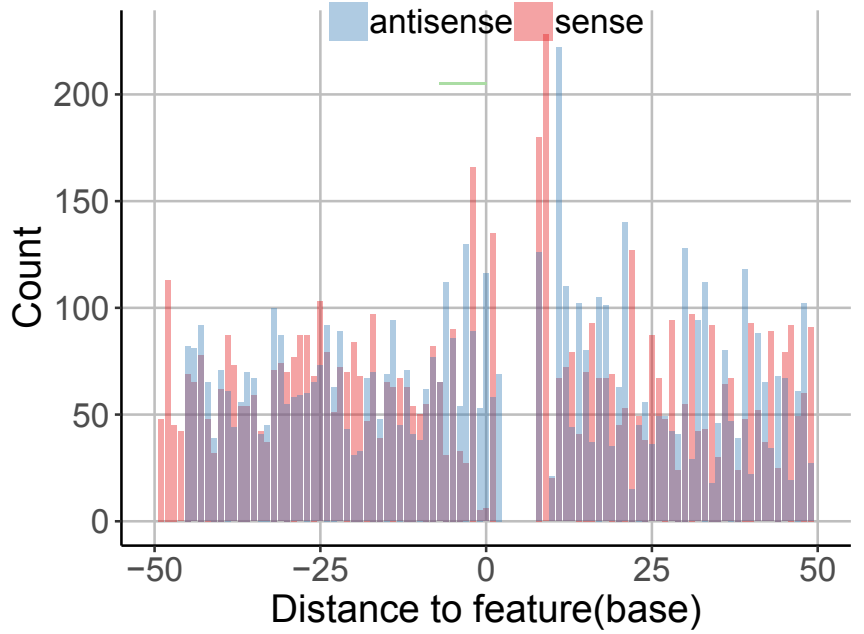

**CELF4-UGUGUUGUGU**

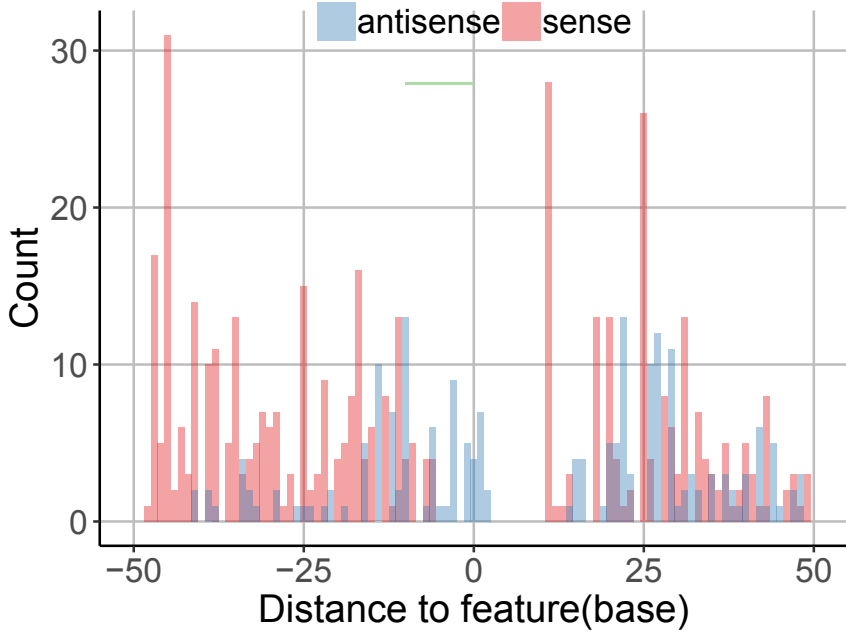

**ZRANB2-NNGGUAAGGUNN**

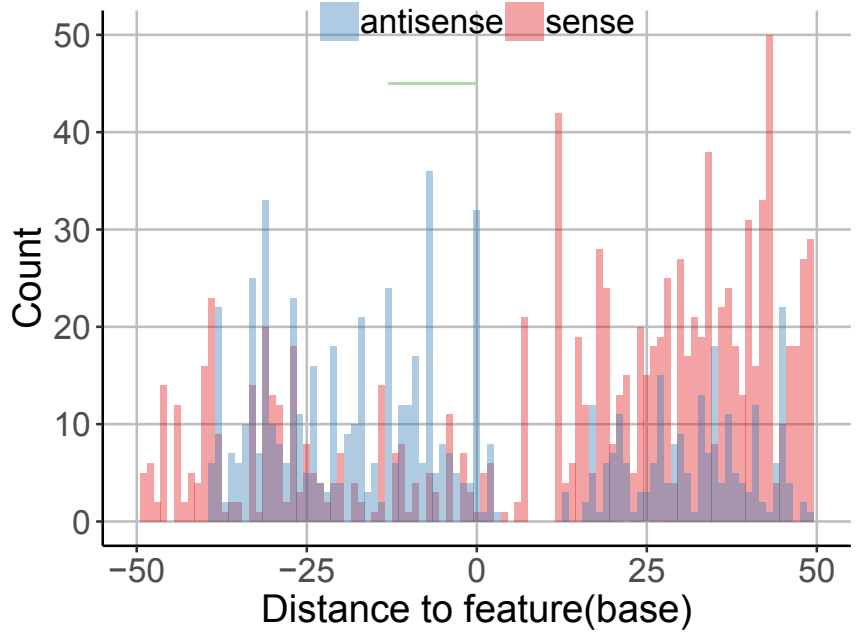

**RBM4-CGGGGURUGN**

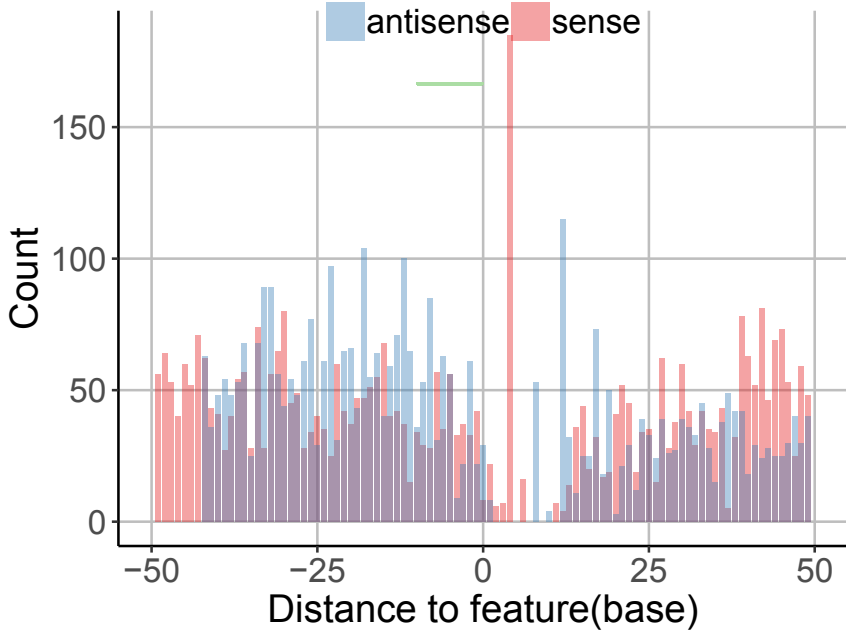

**RBPM5-NAGGCACR**

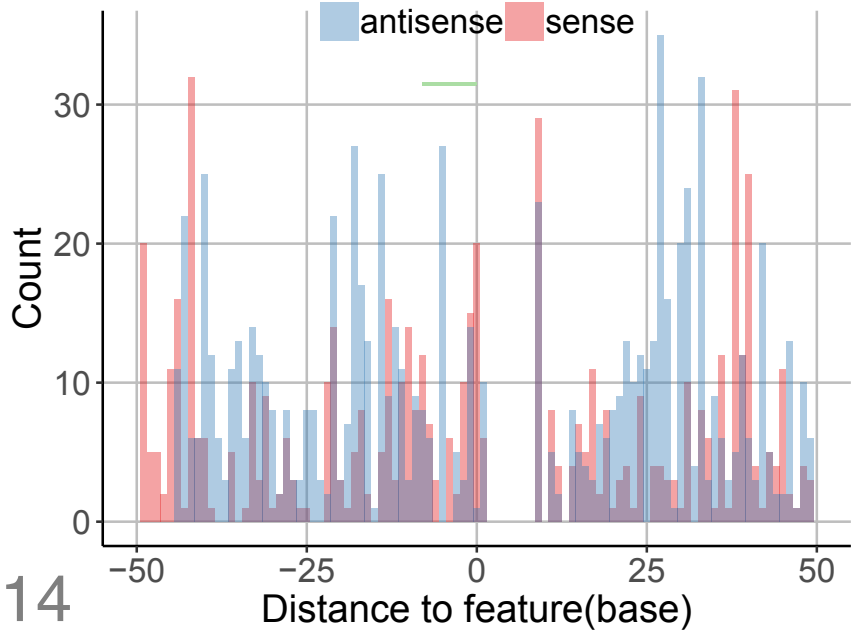

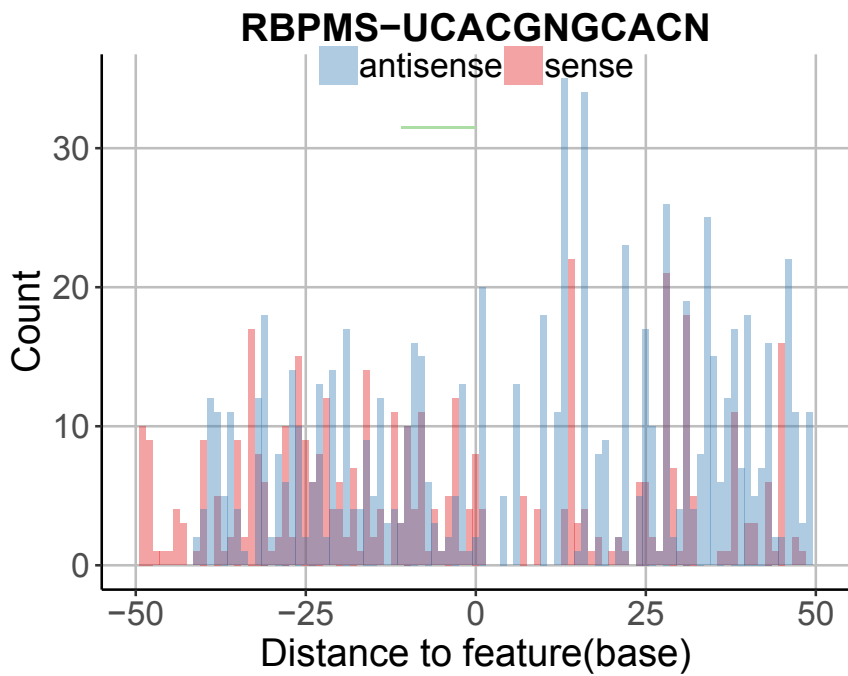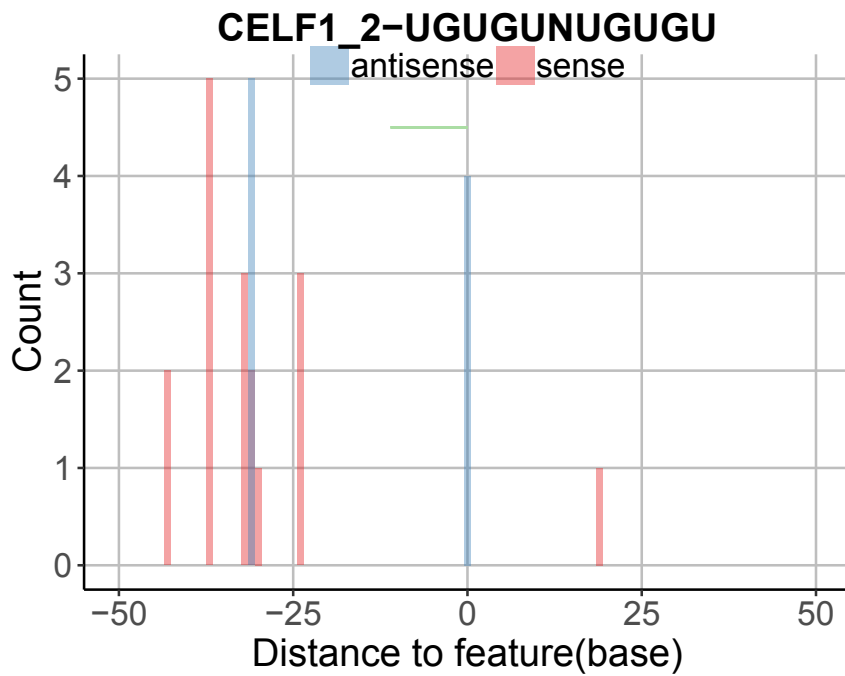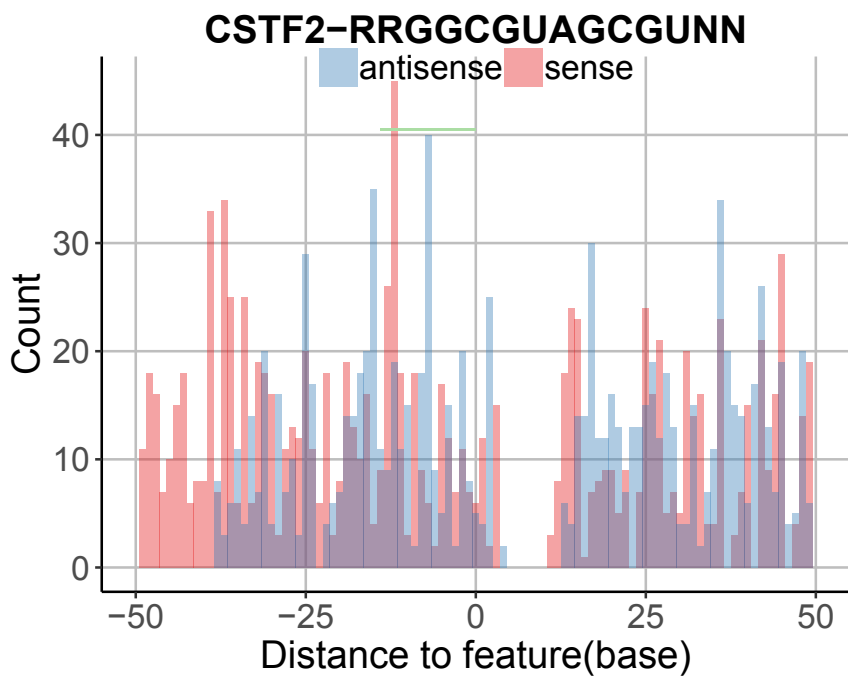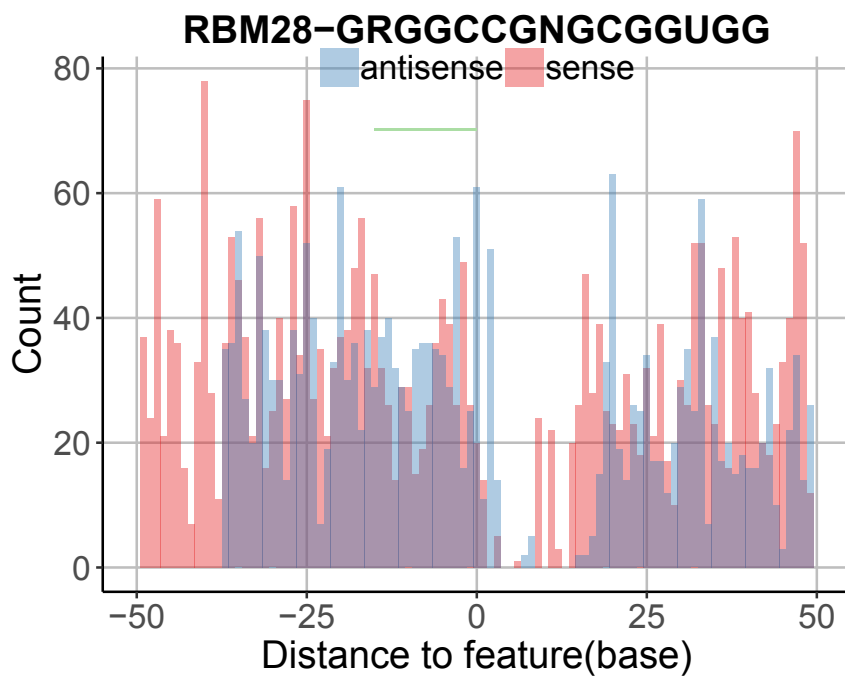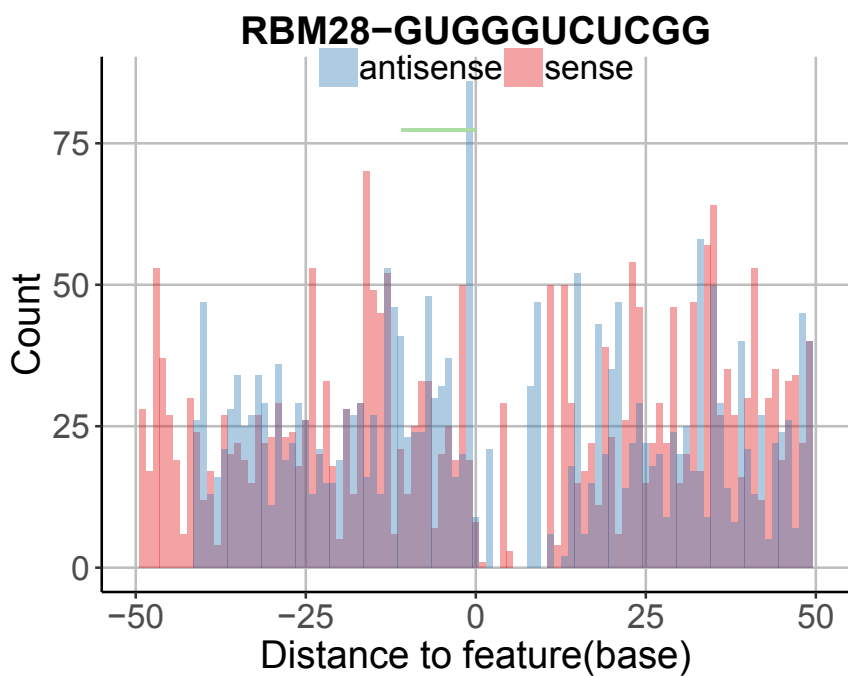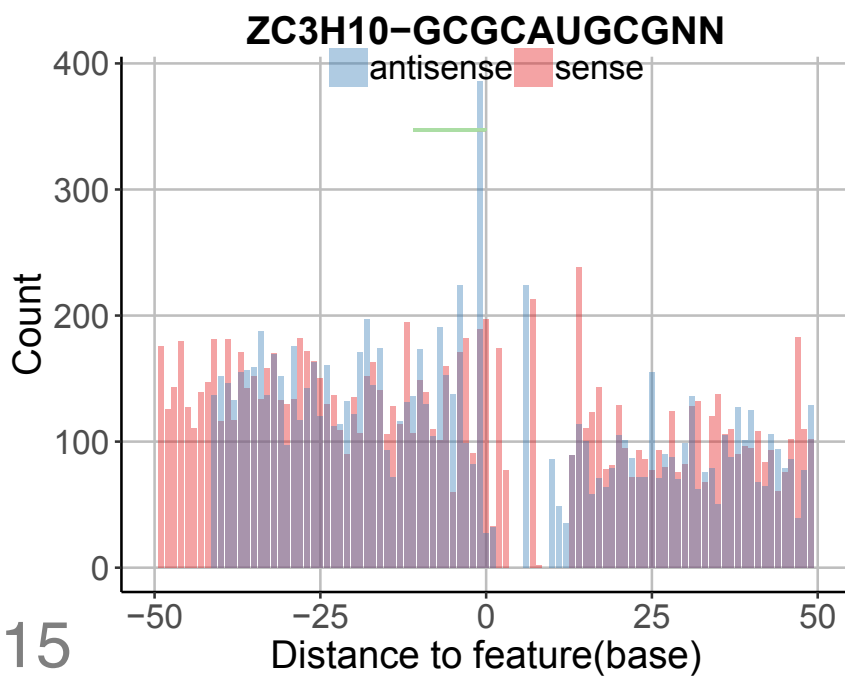

15



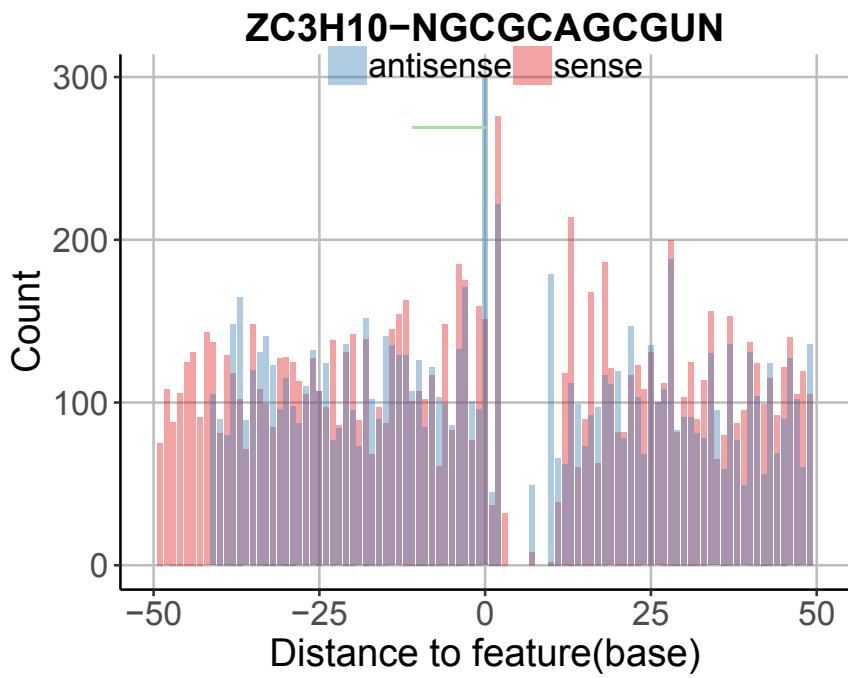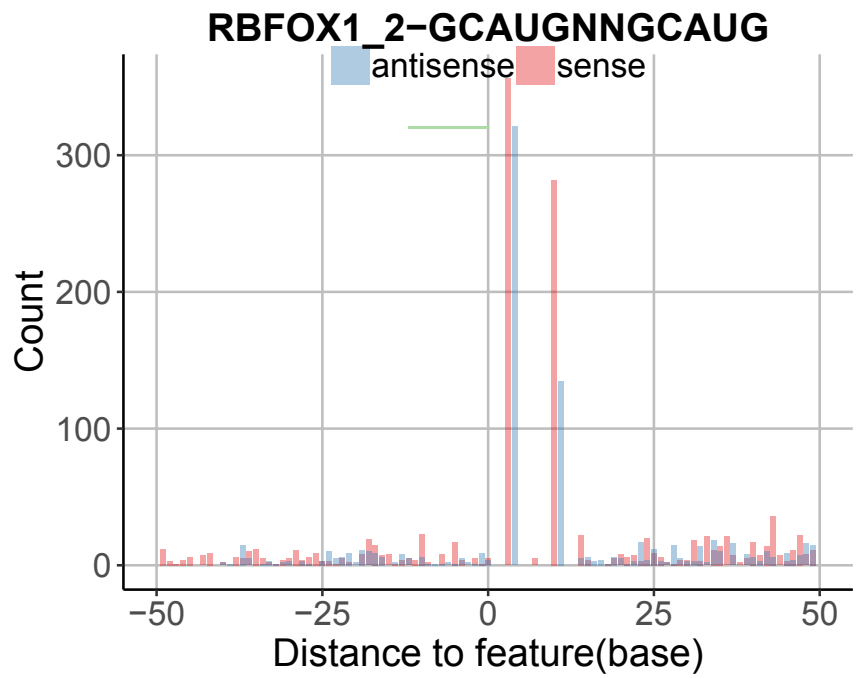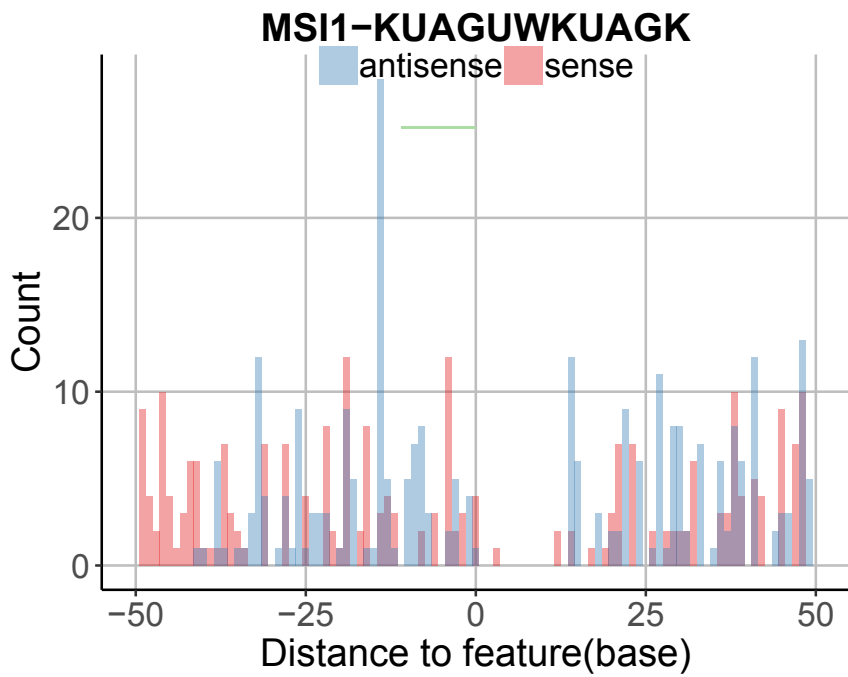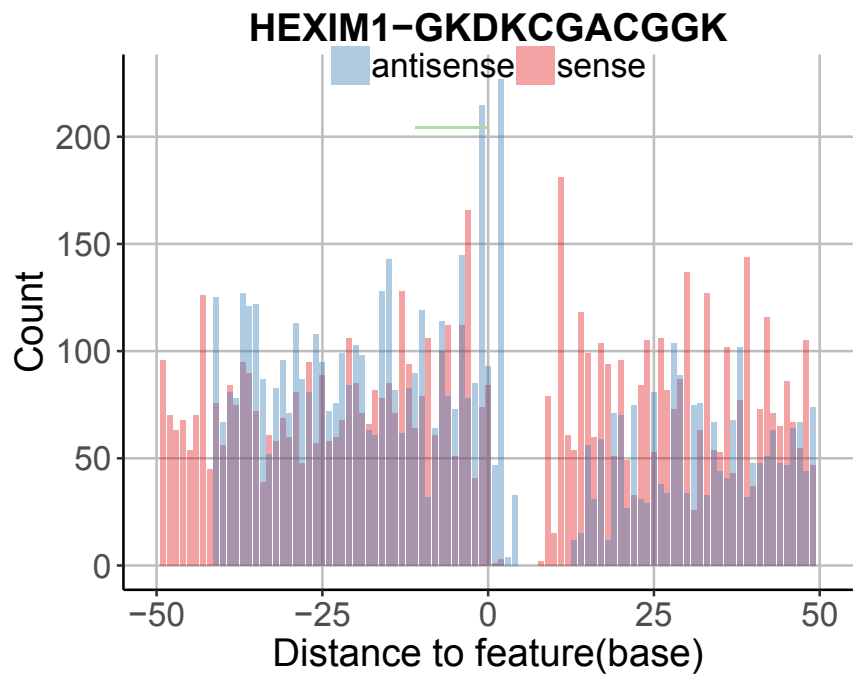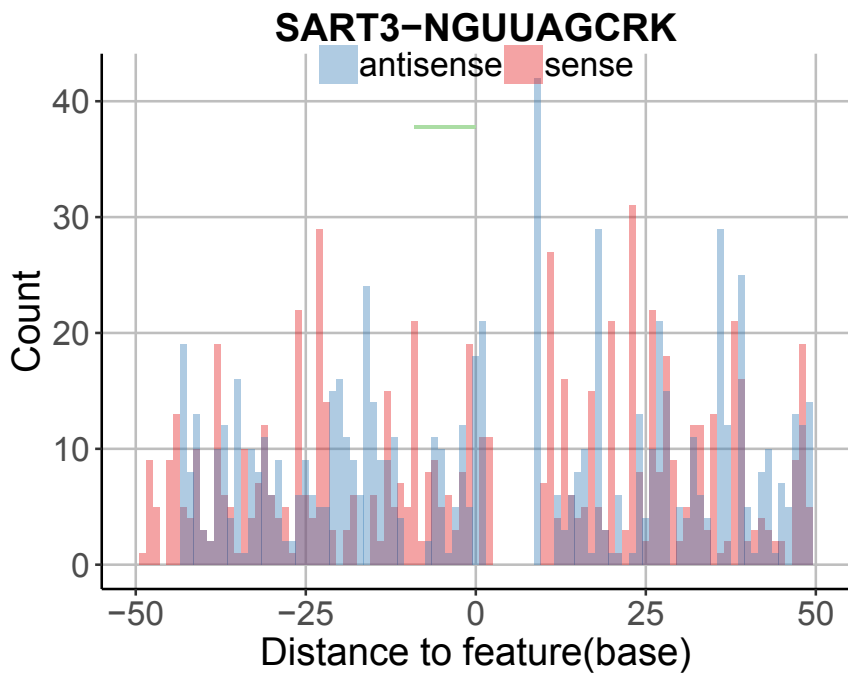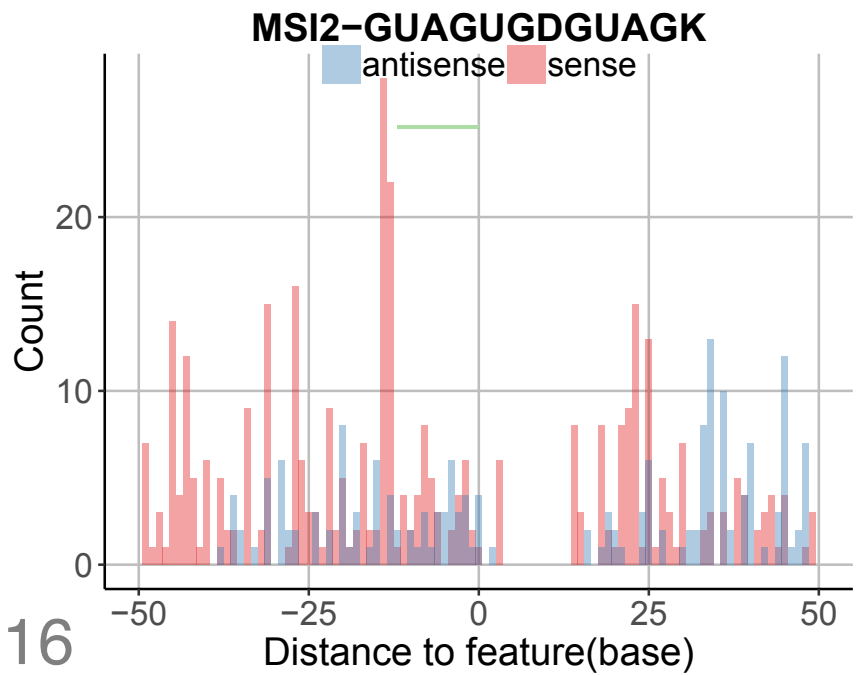

16

**MSI2-GUAGUNNNGUAGK**

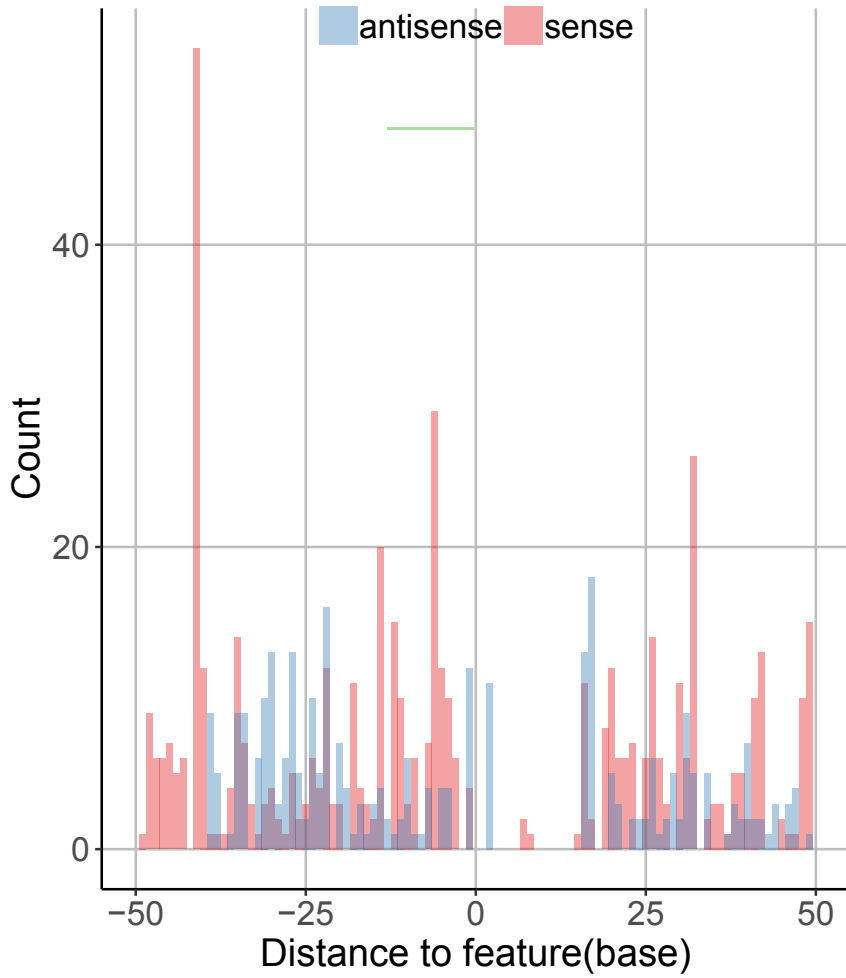

**ZCRB1-GNNUUAAKK**

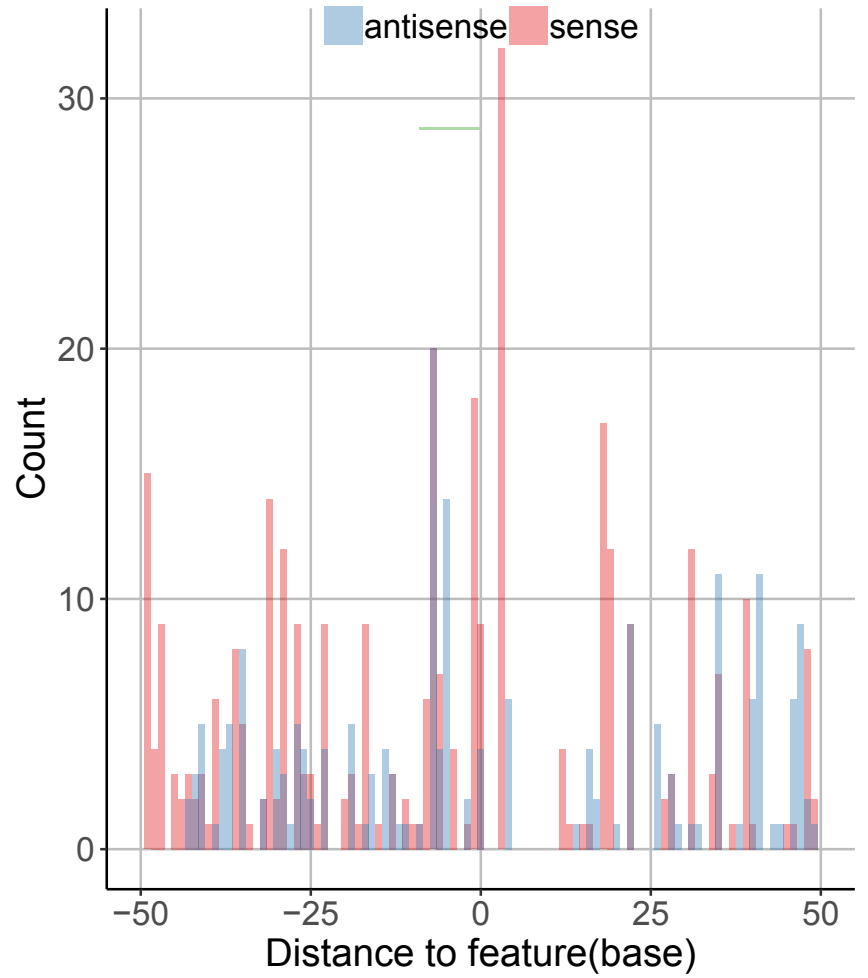

**ZCRB1-GUGGACUUA**

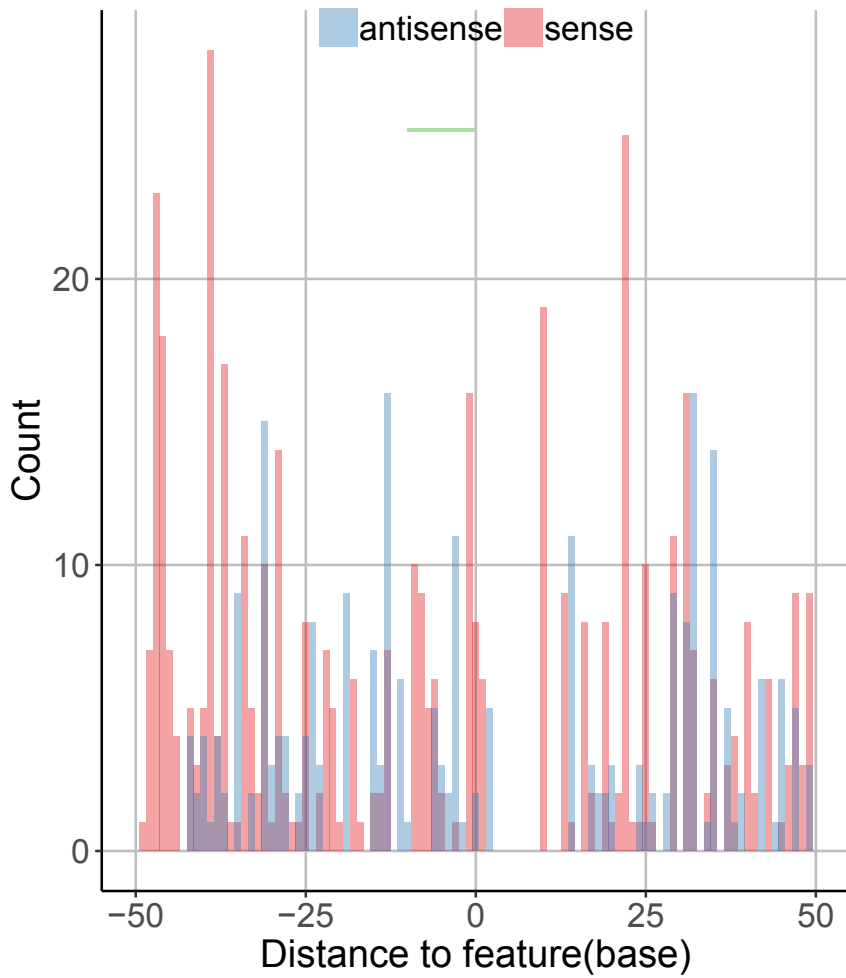

**LARP6-GUGUCNNNNNNNNNGAAGUCN**

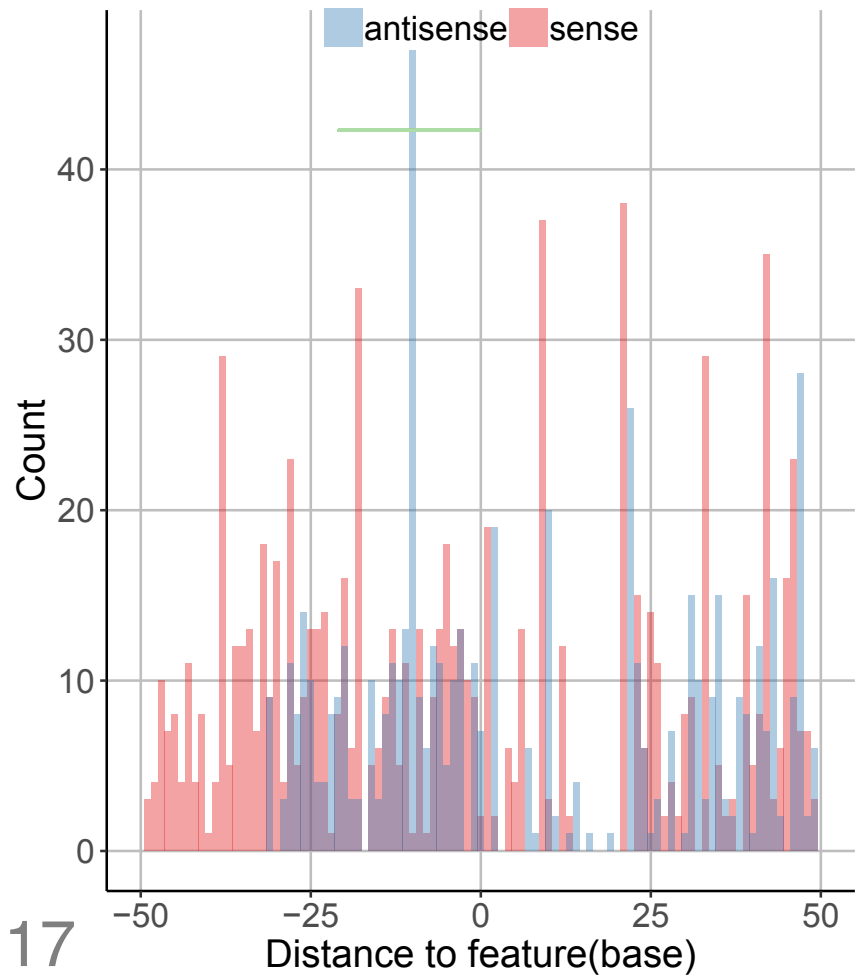

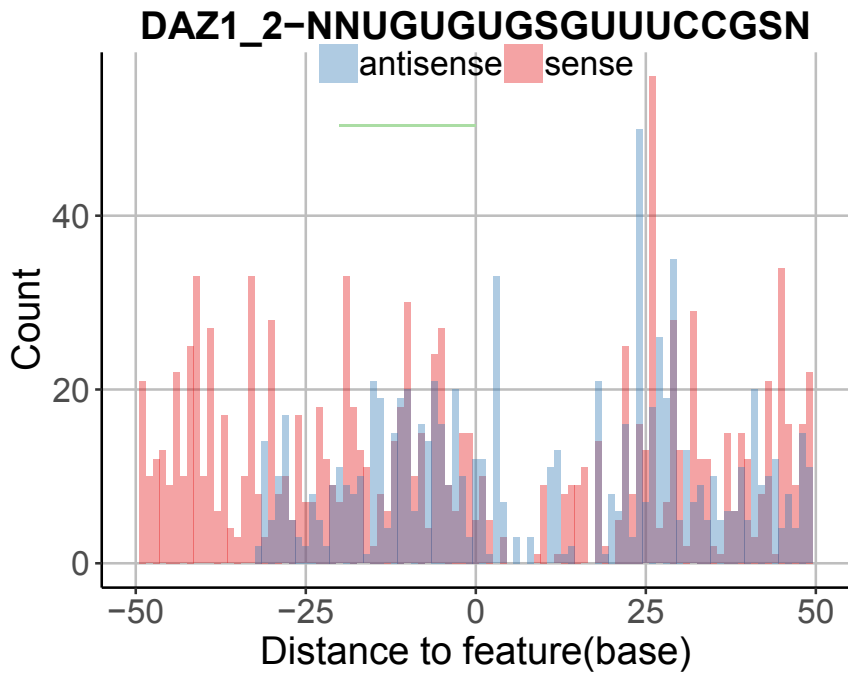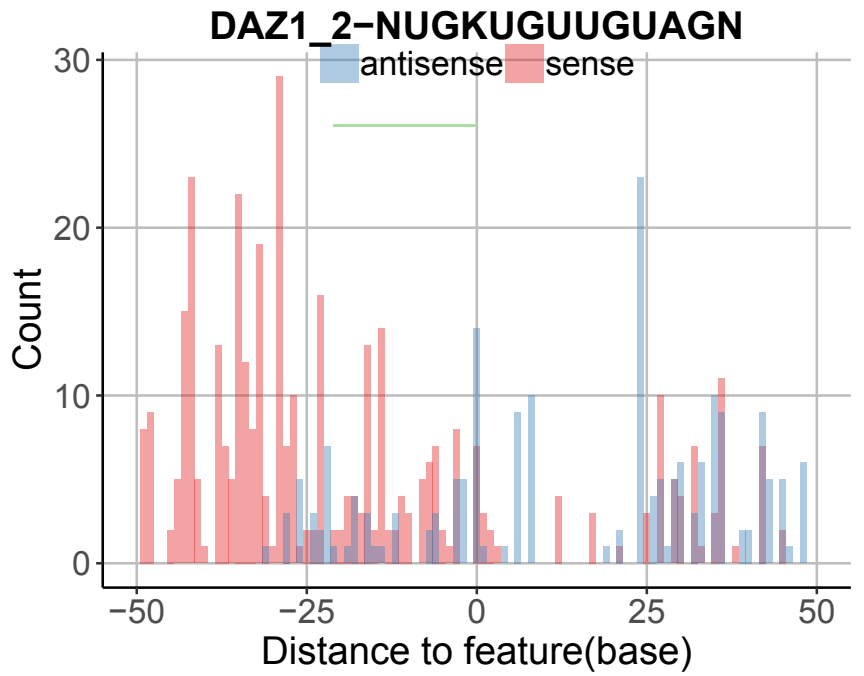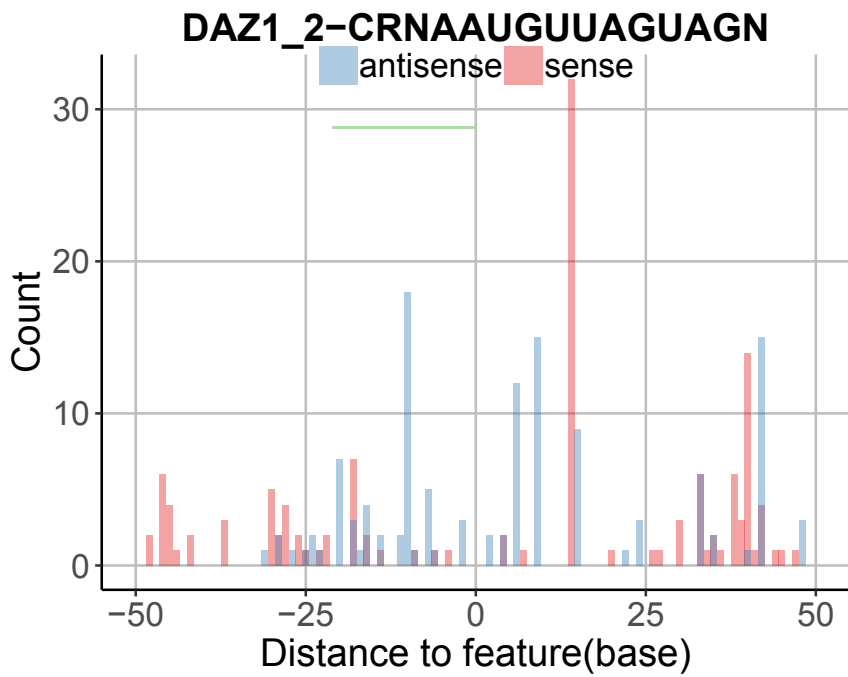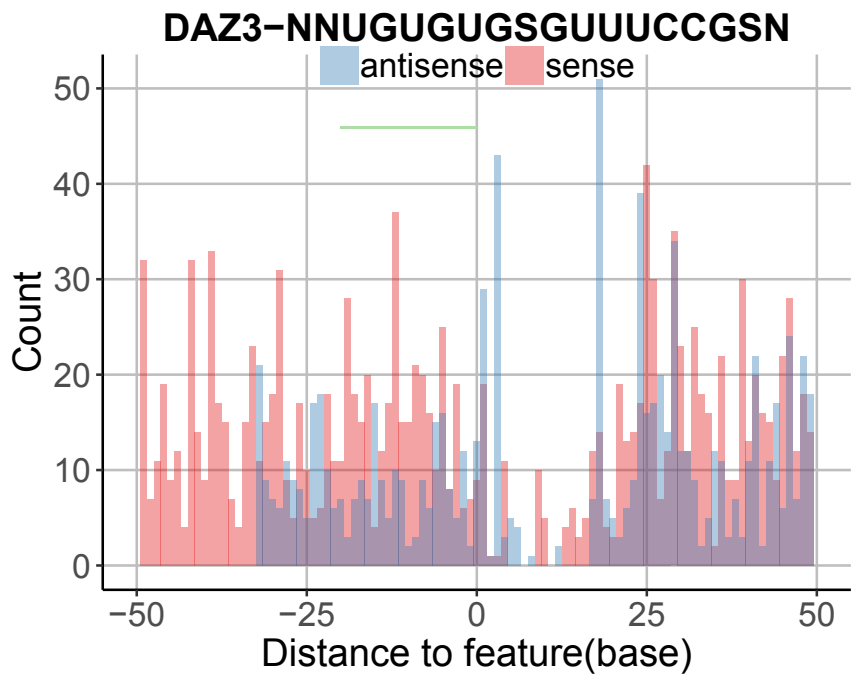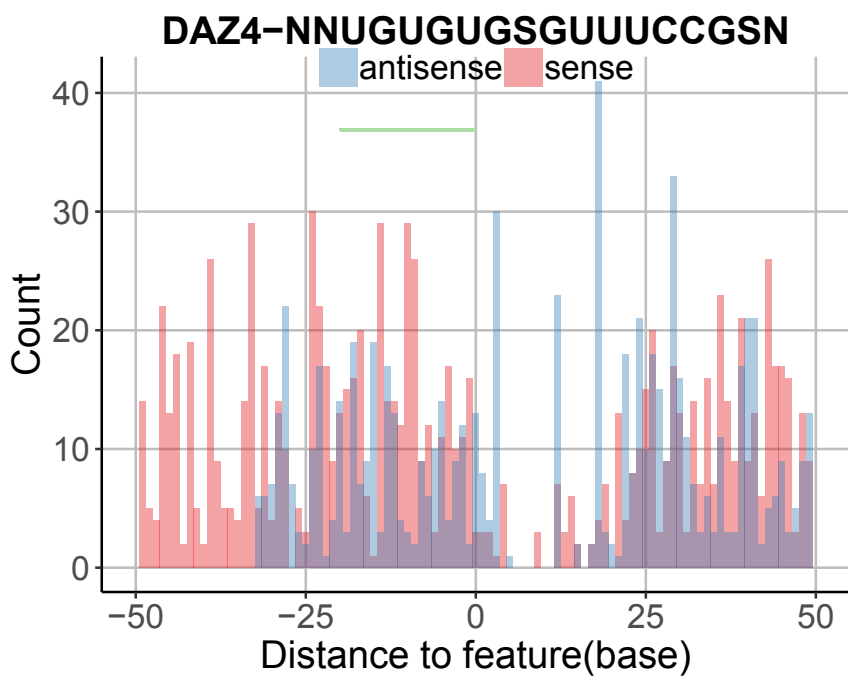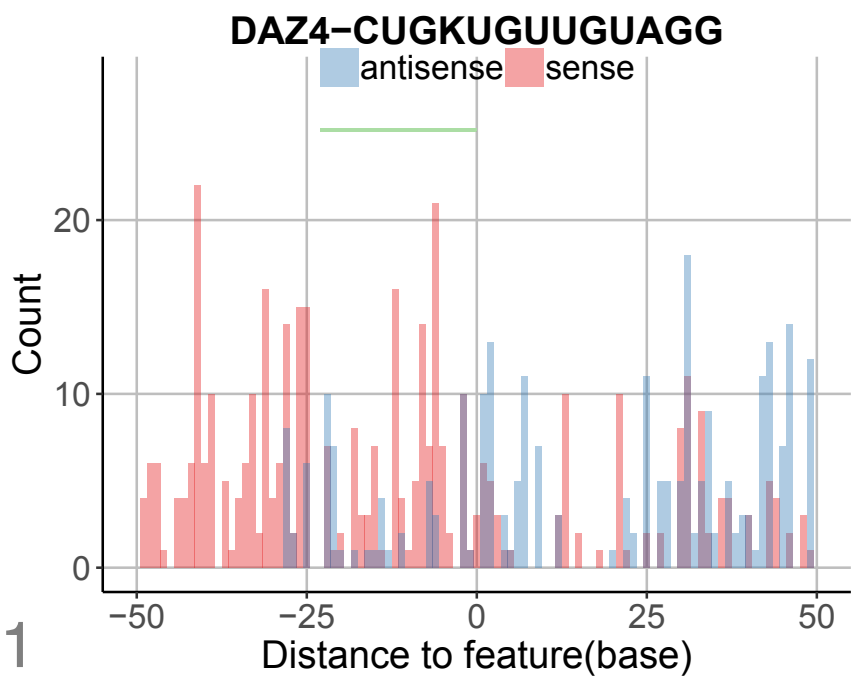

1

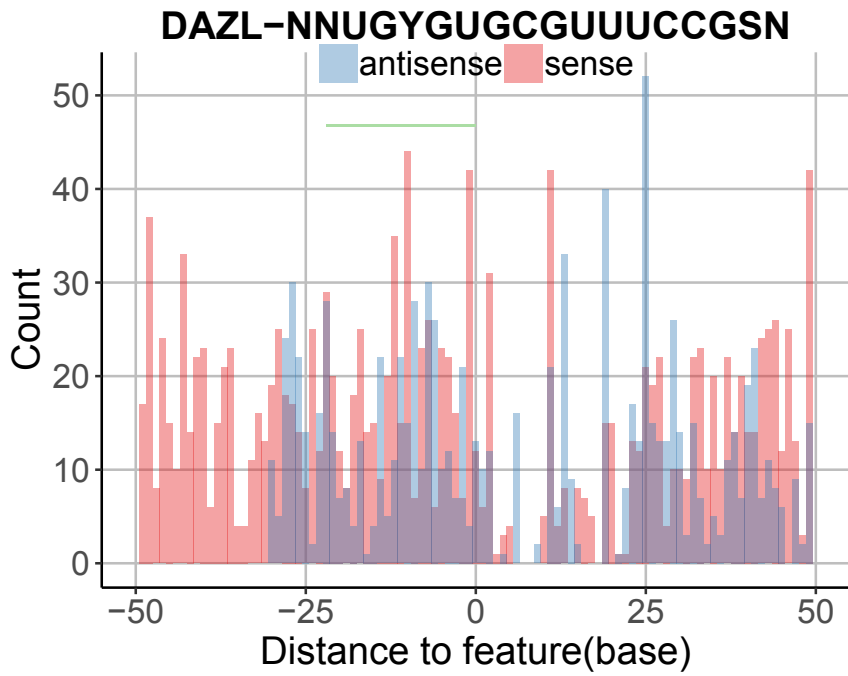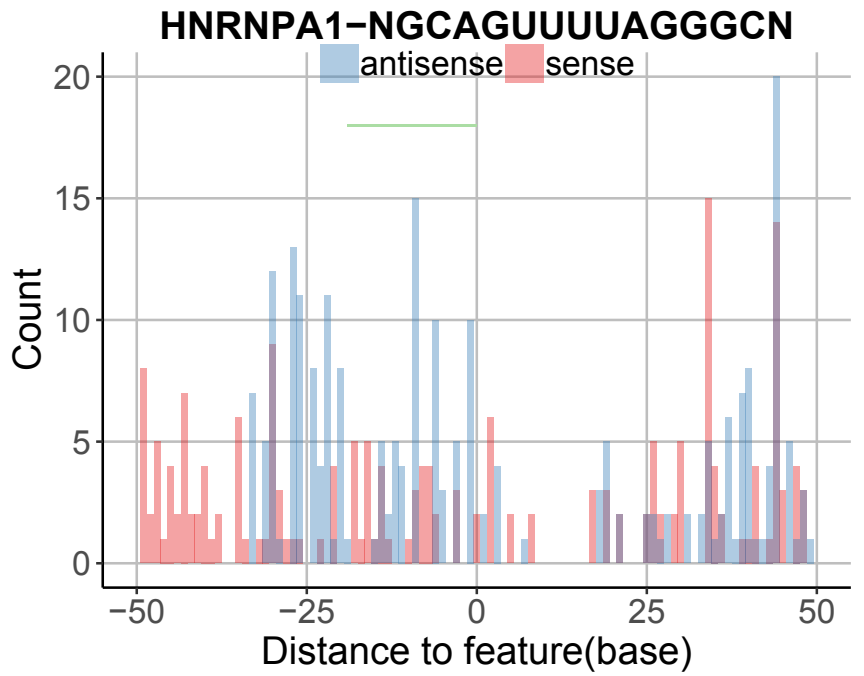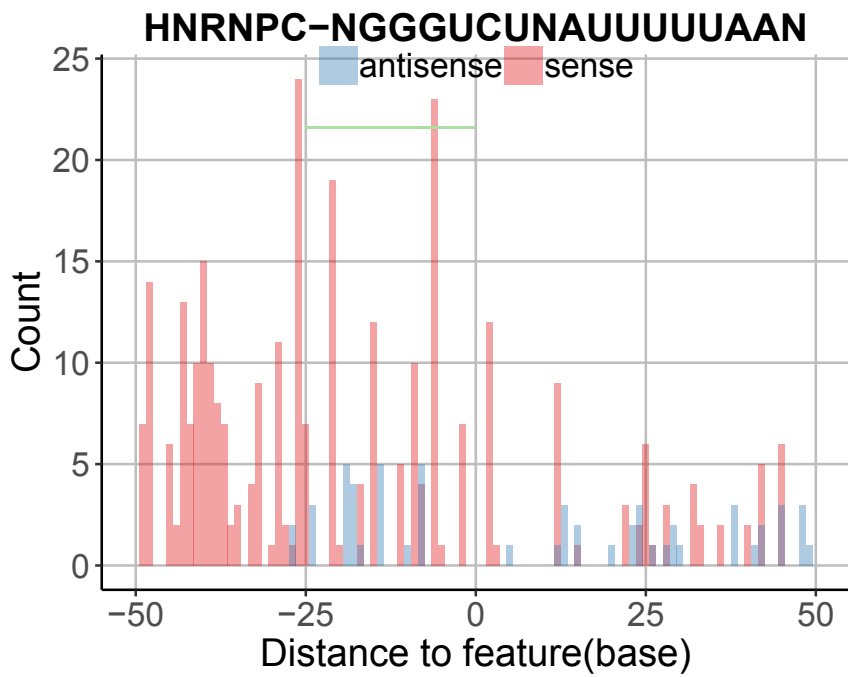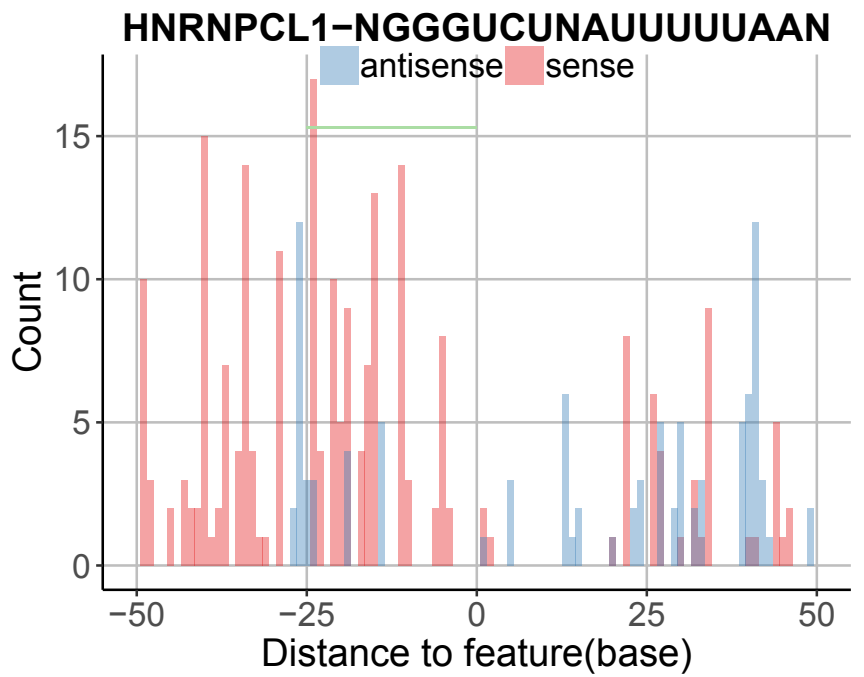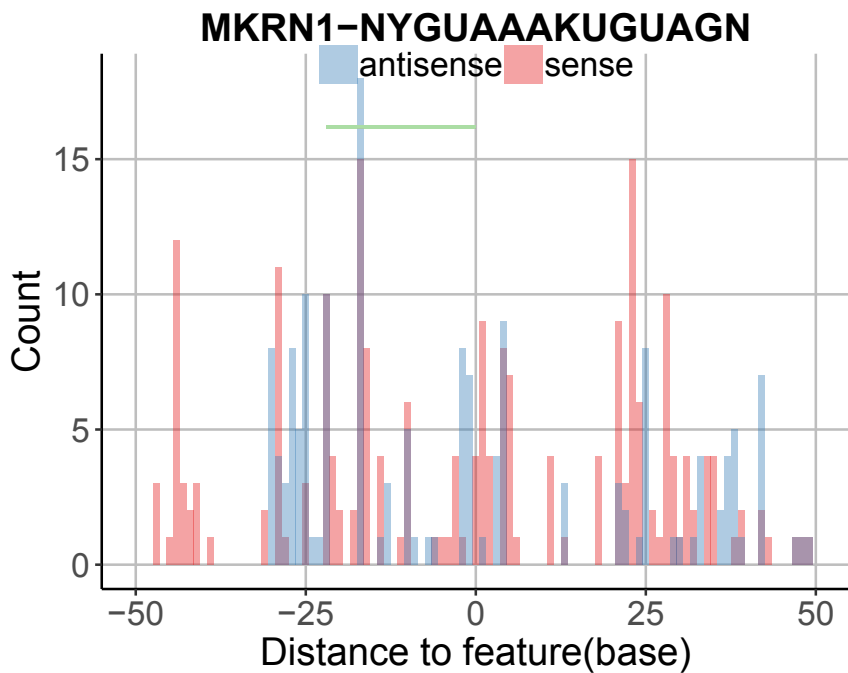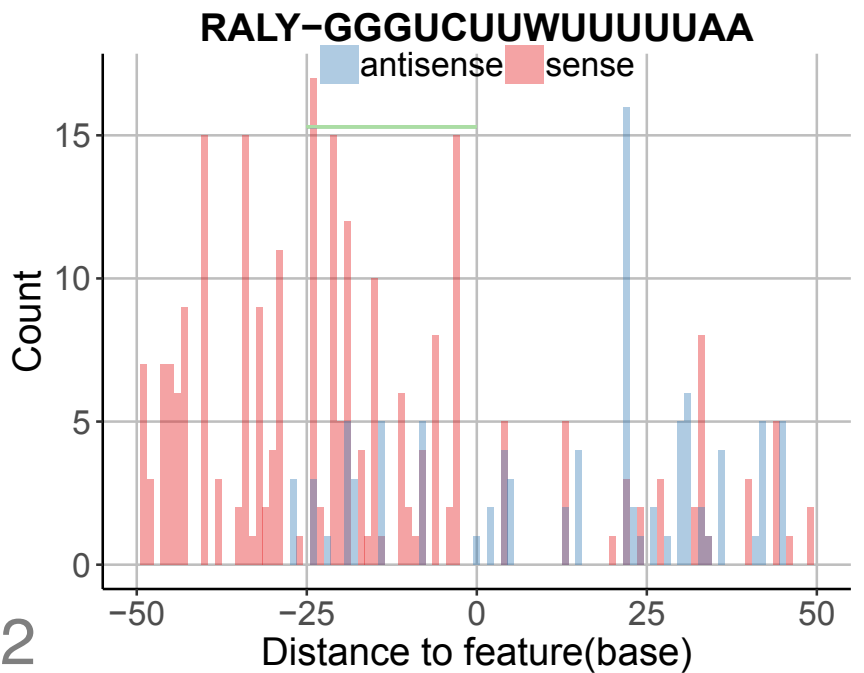

2

**RBFOX1\_4-GKUGCAUGUG**

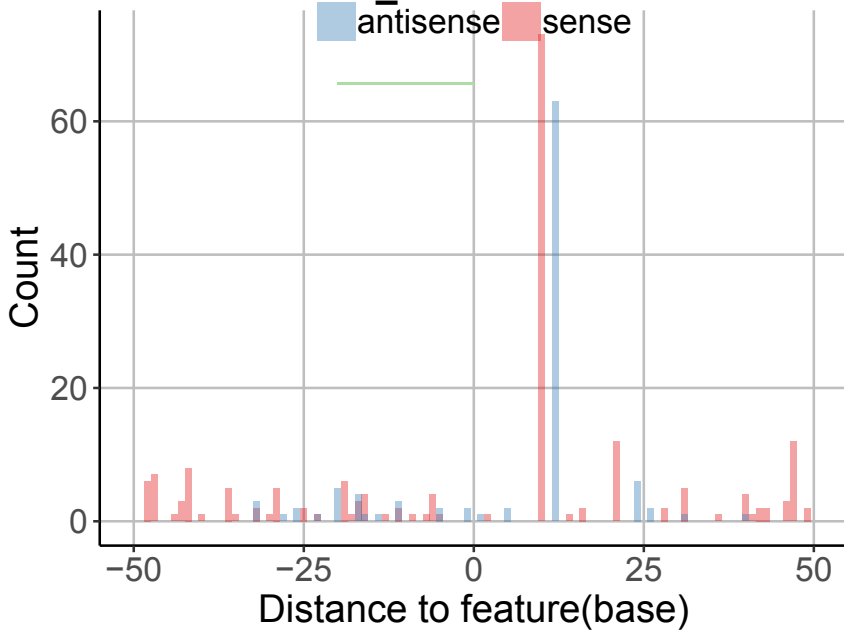

**RBFOX3-GUWGC AUGUG**

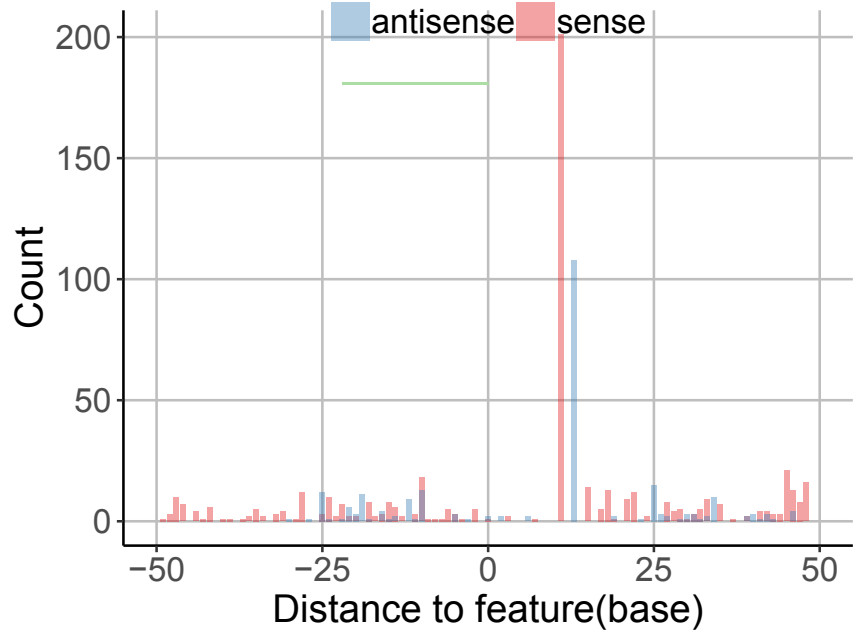

**RBM4-KGUUGC GCGGG**

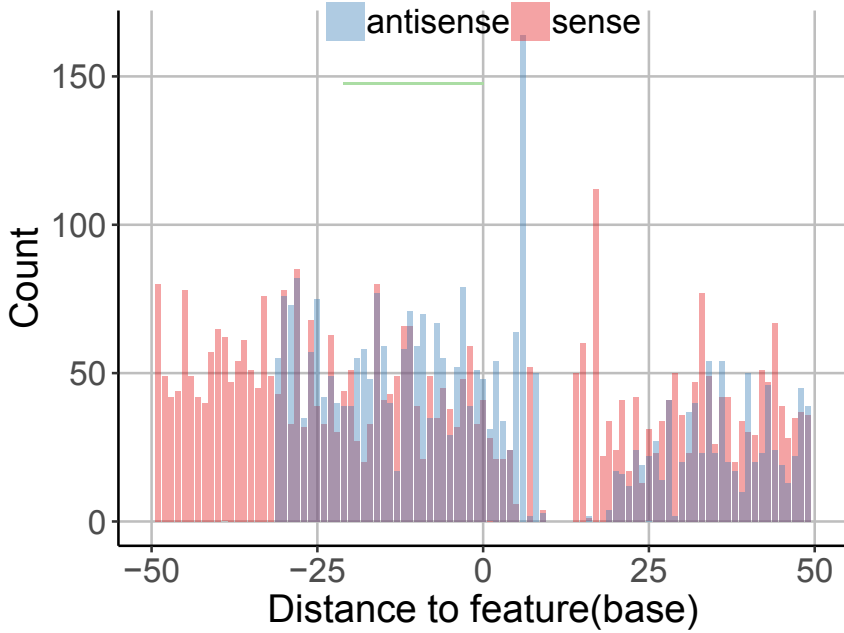

**RBM4-UGAGUG CGGUAG**

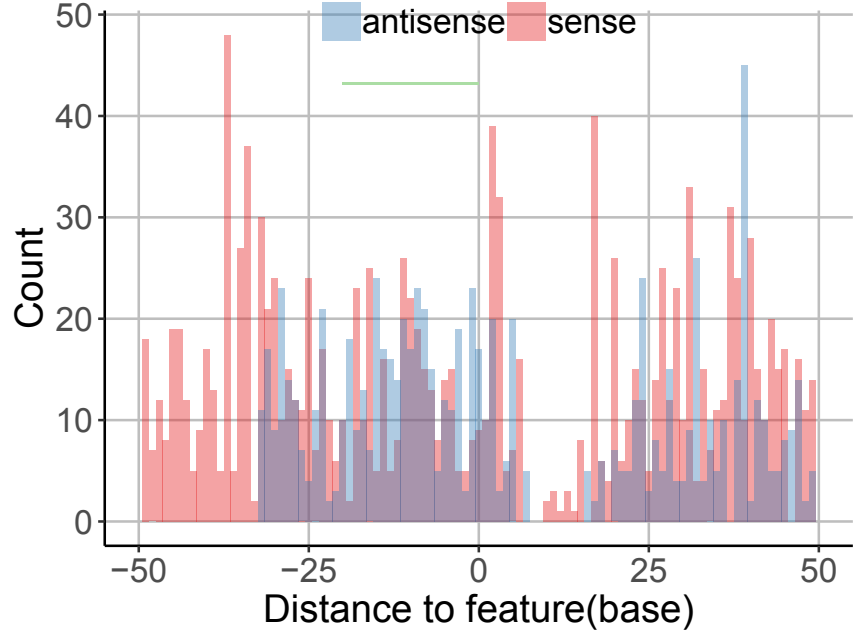

**RBM4B-KGUUGC GCGGG**

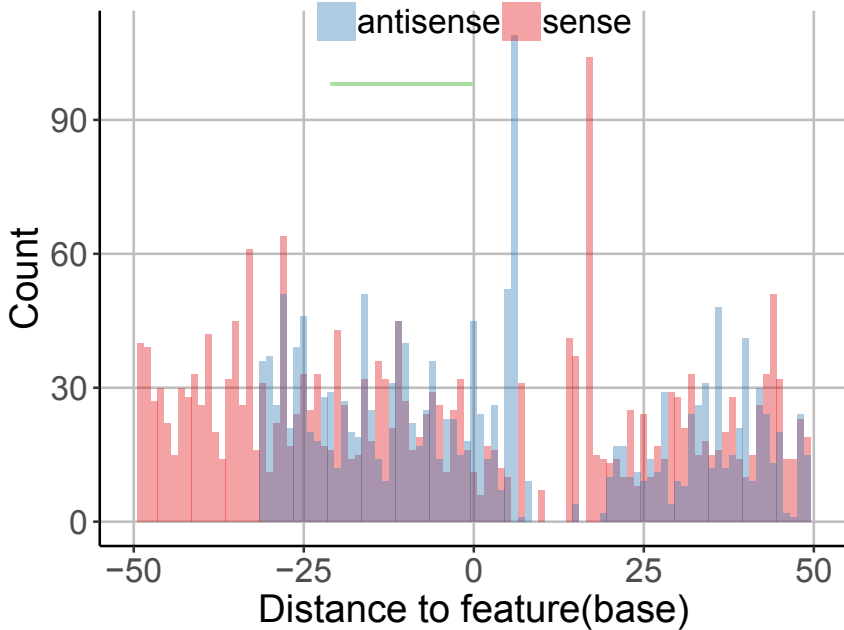

**RBM4B-UGAGUG CGGUAG**

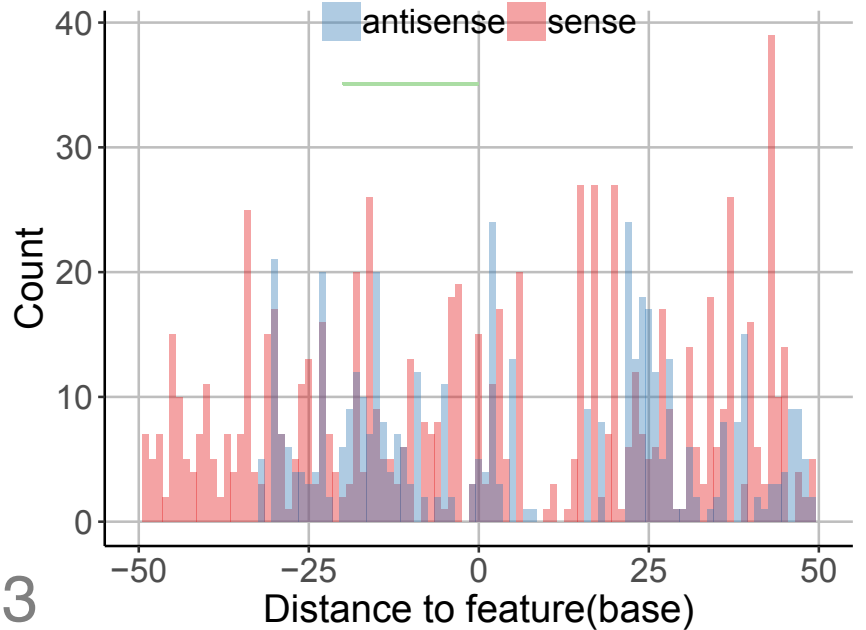

3

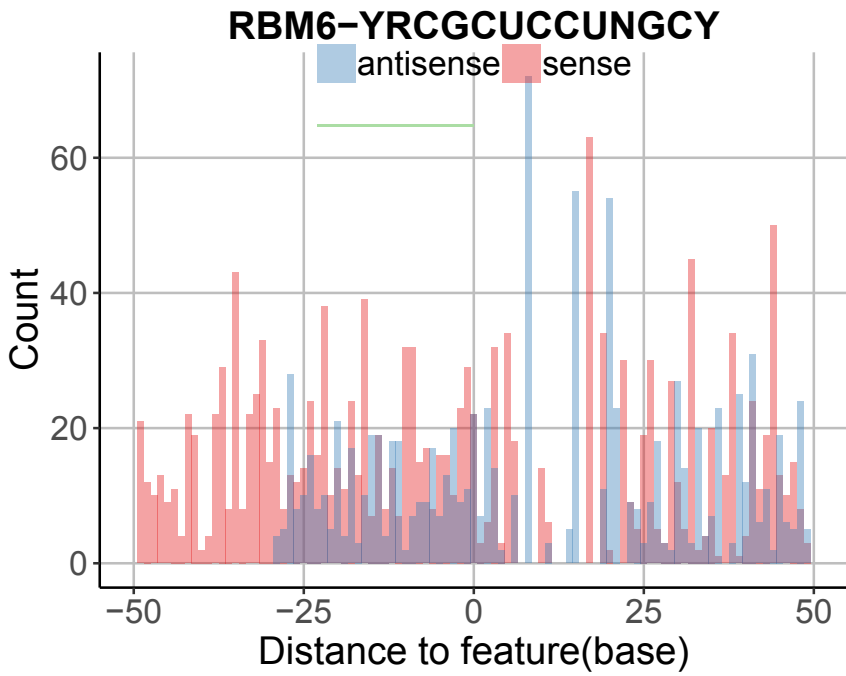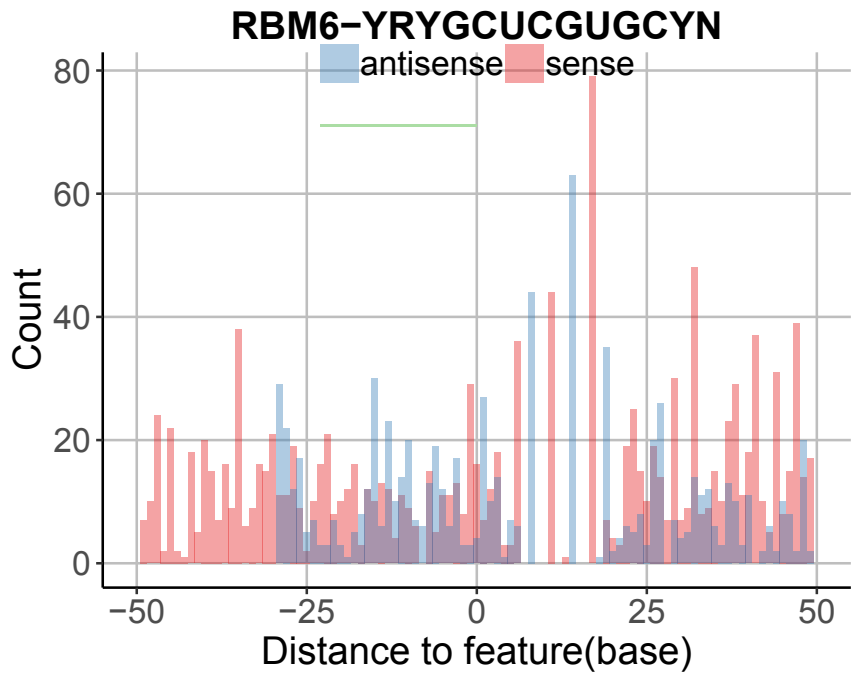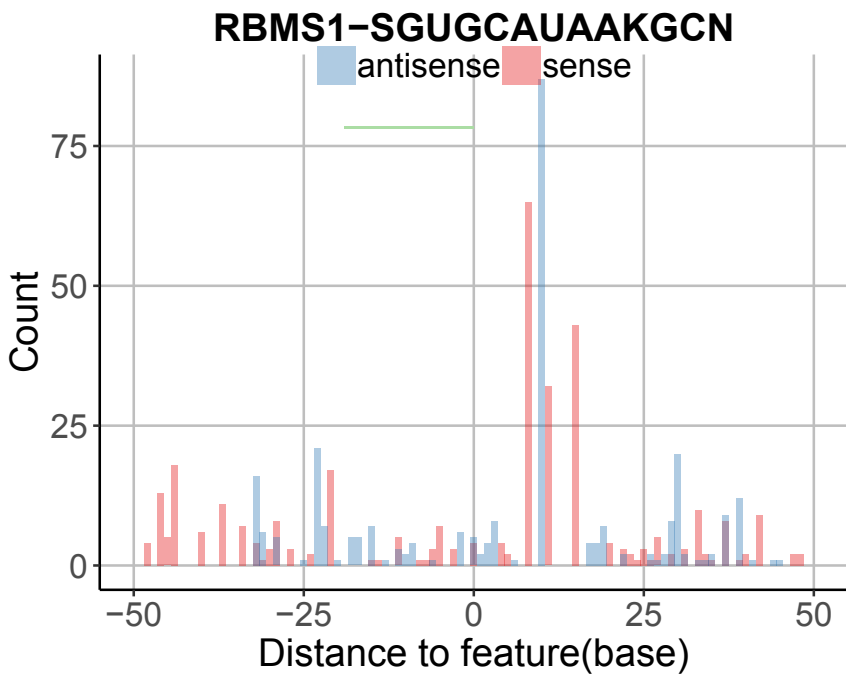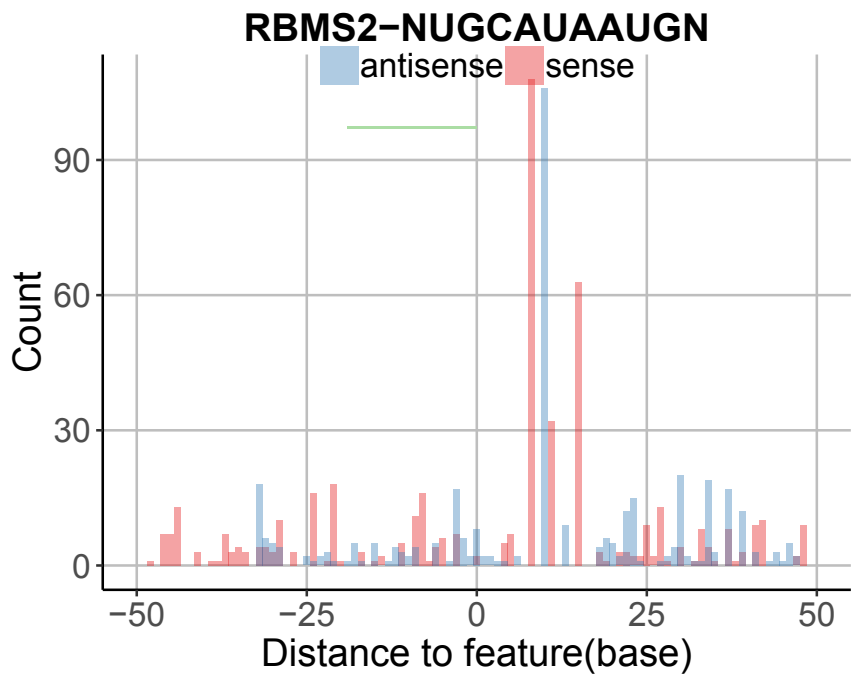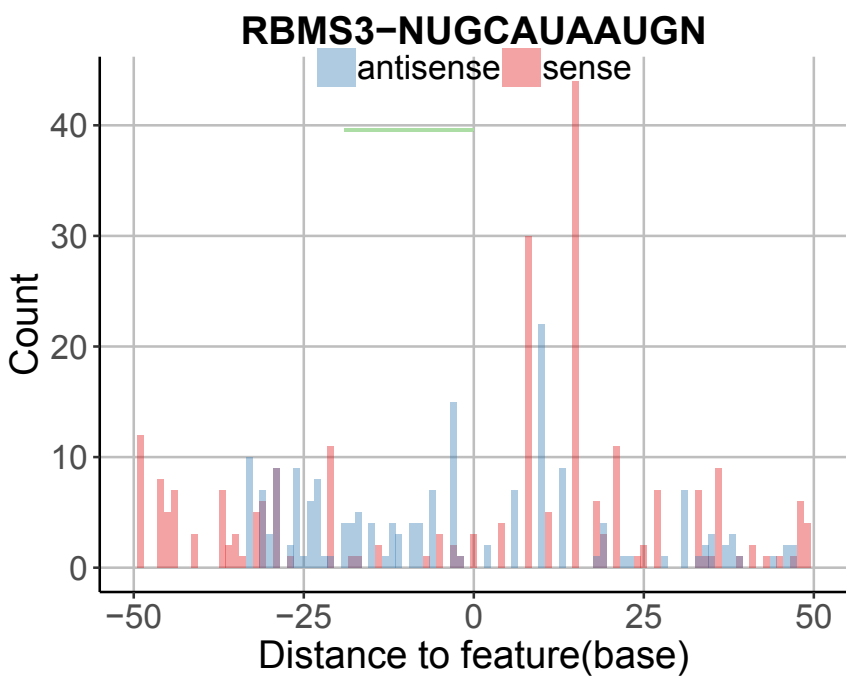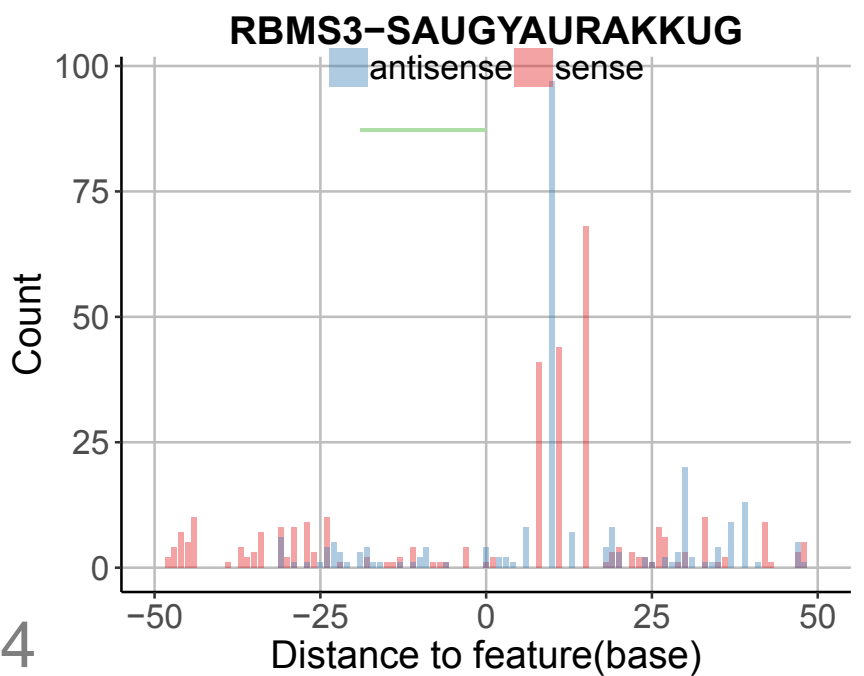

4

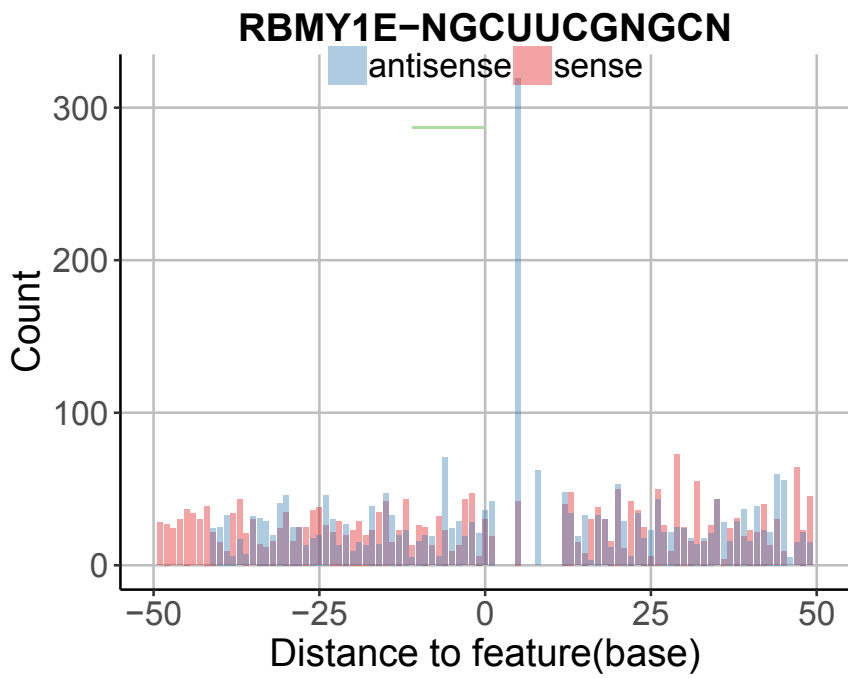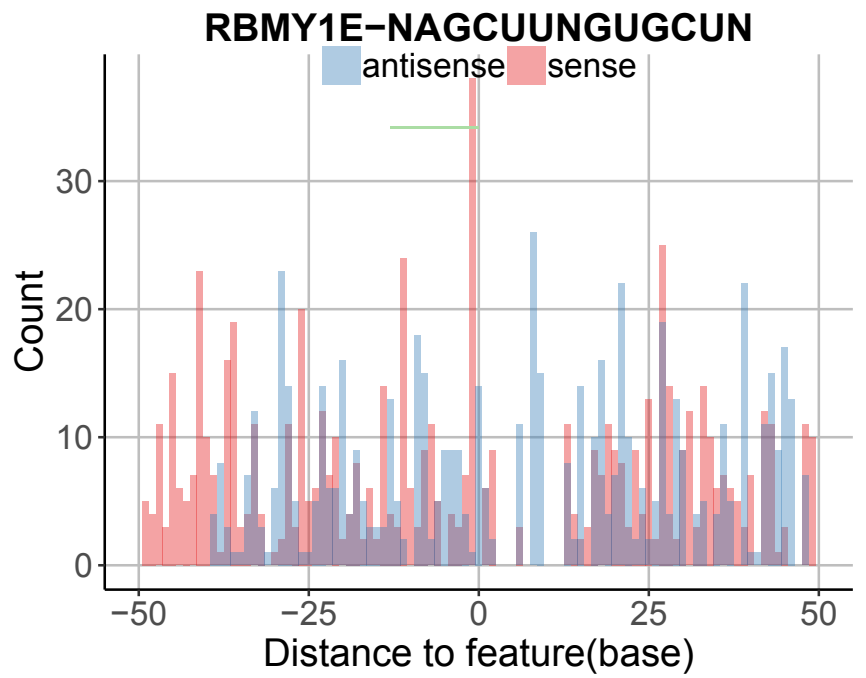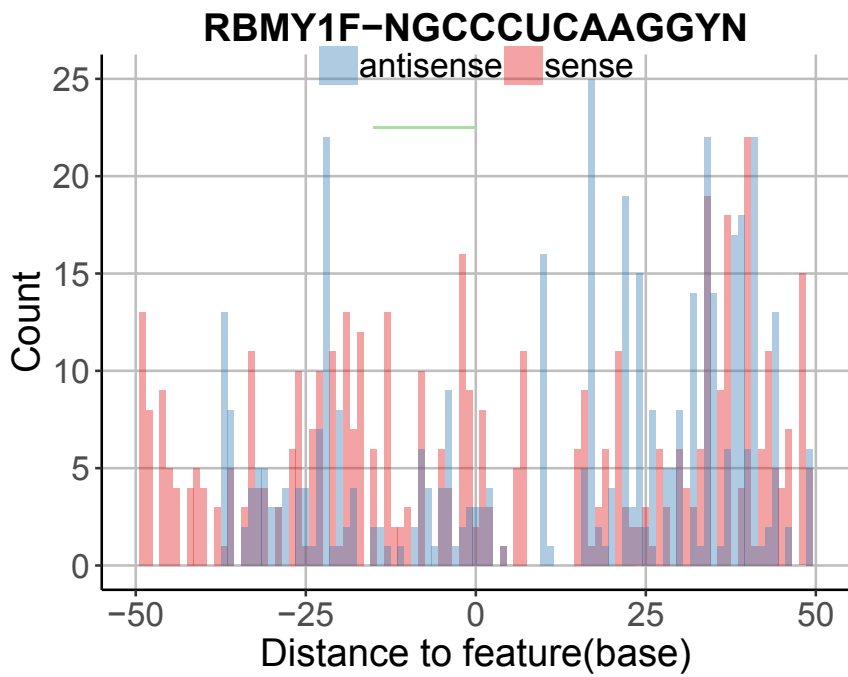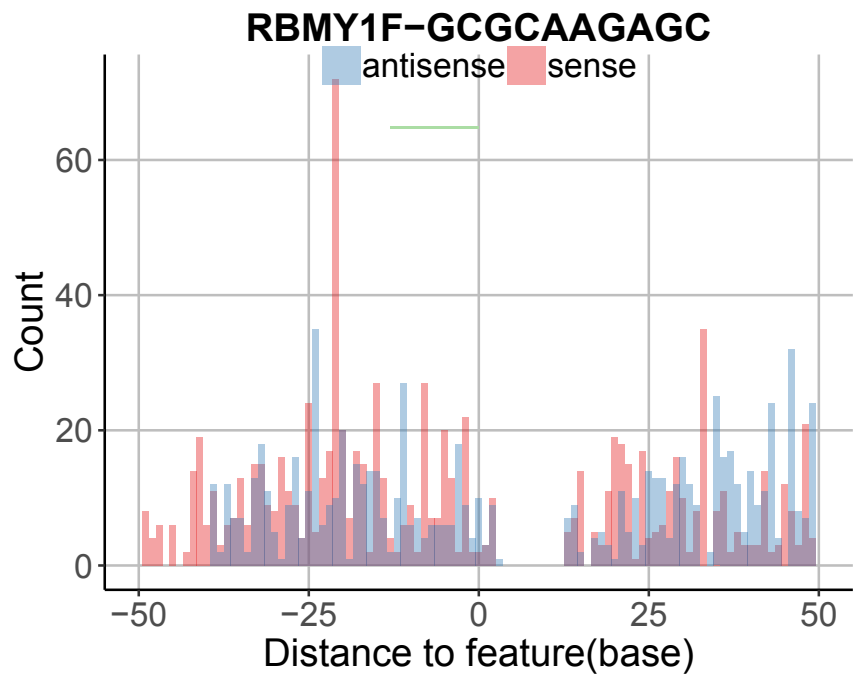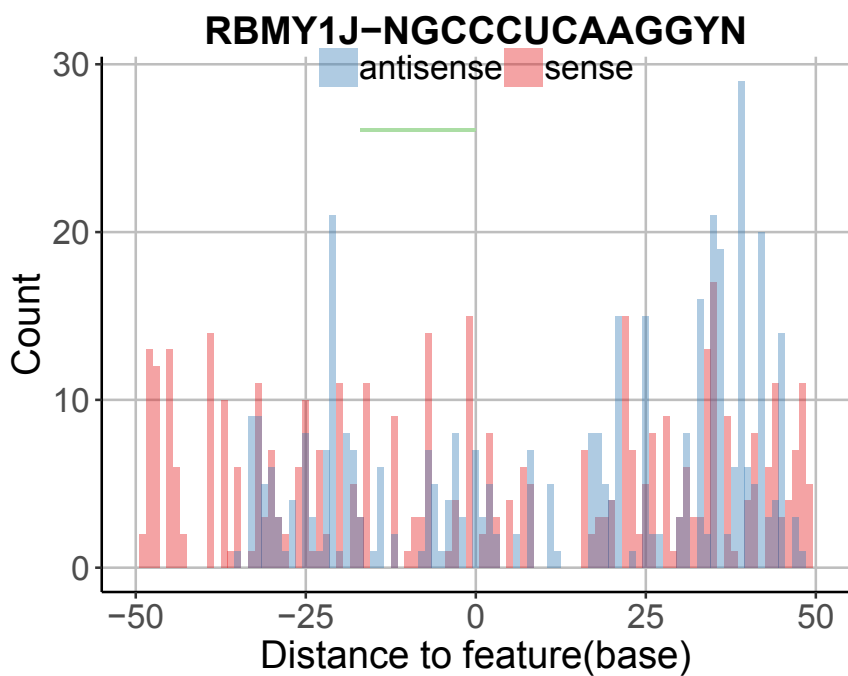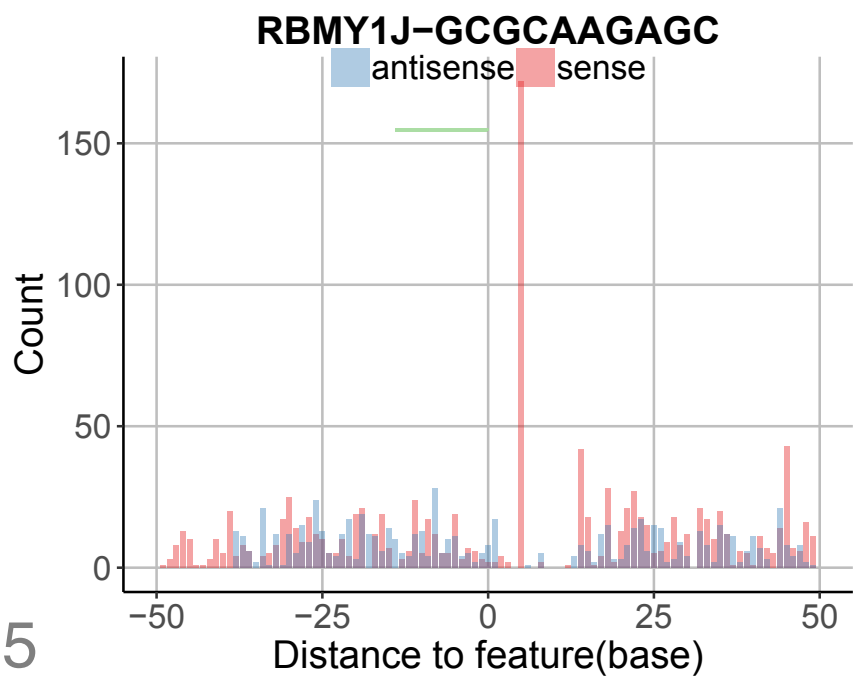

5

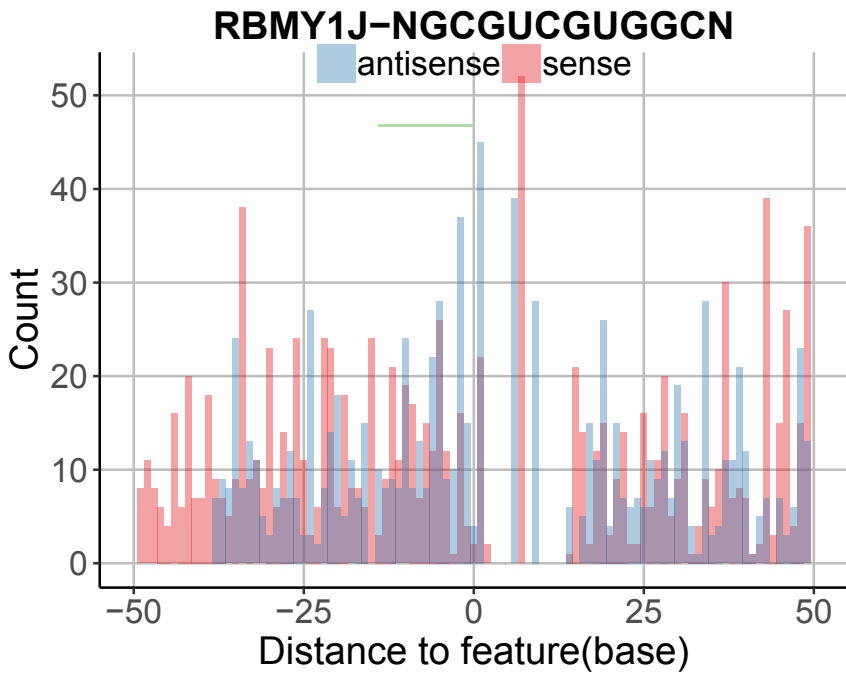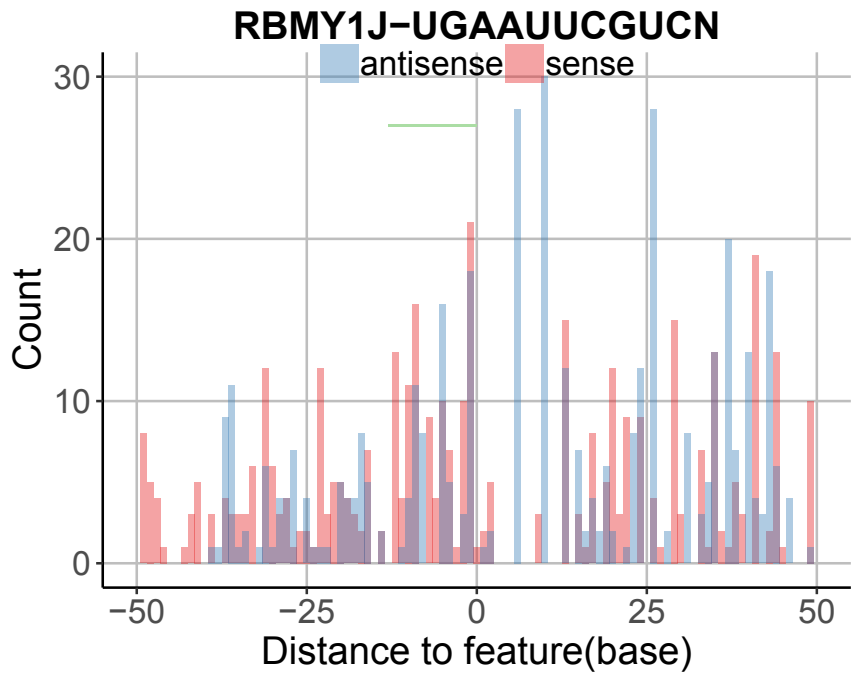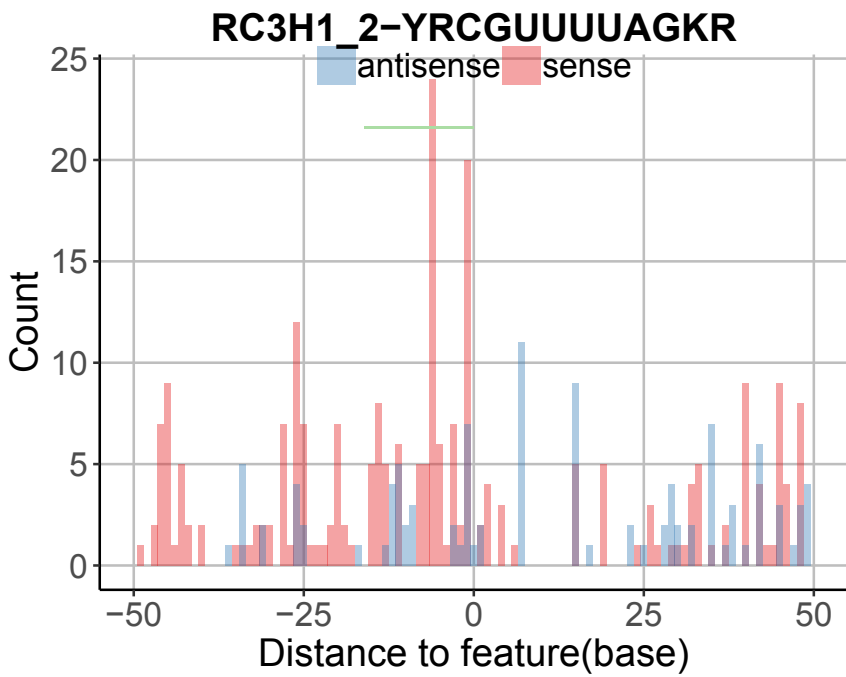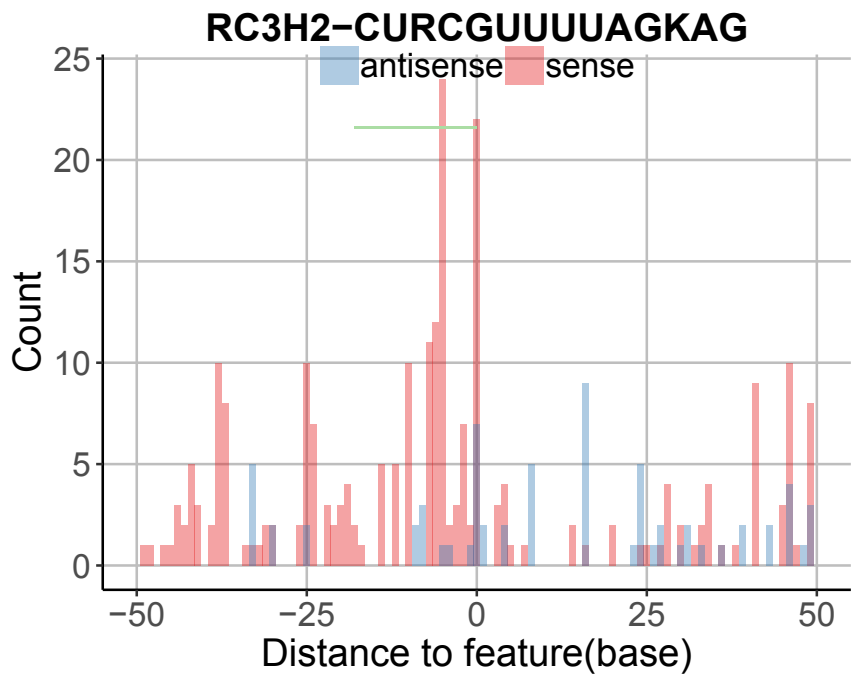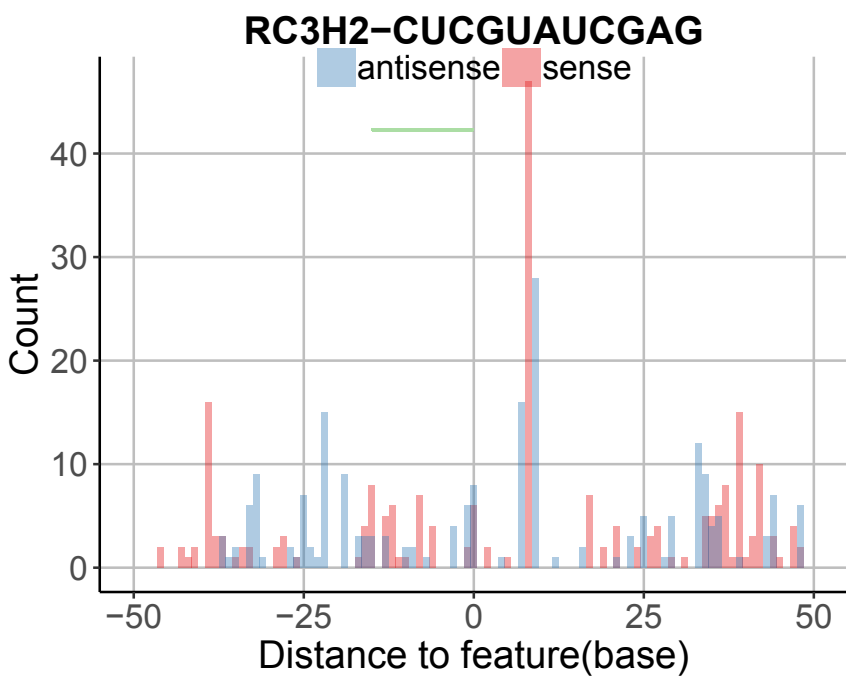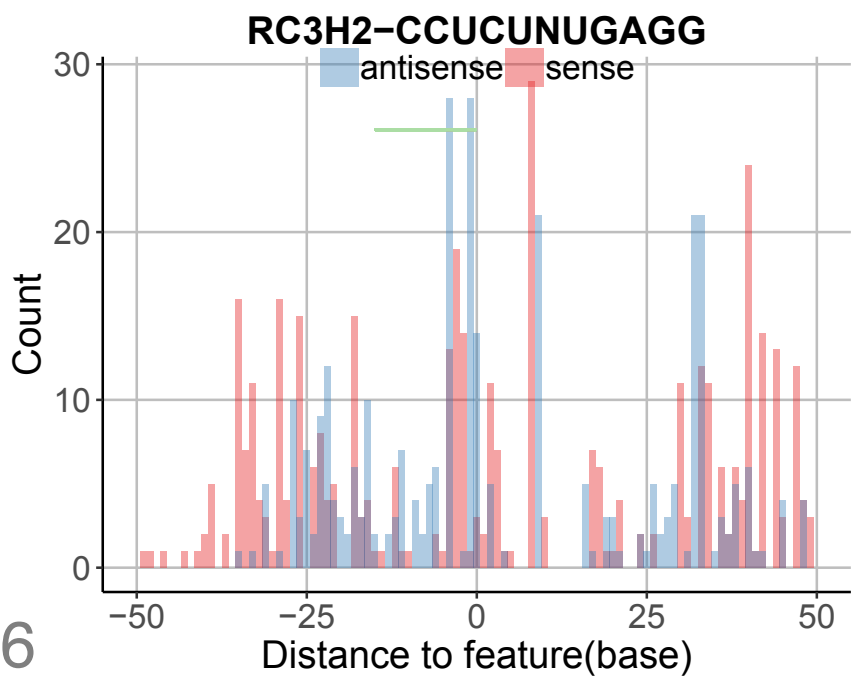

6



**RNPC3-GCAGUKUUAGGGY**

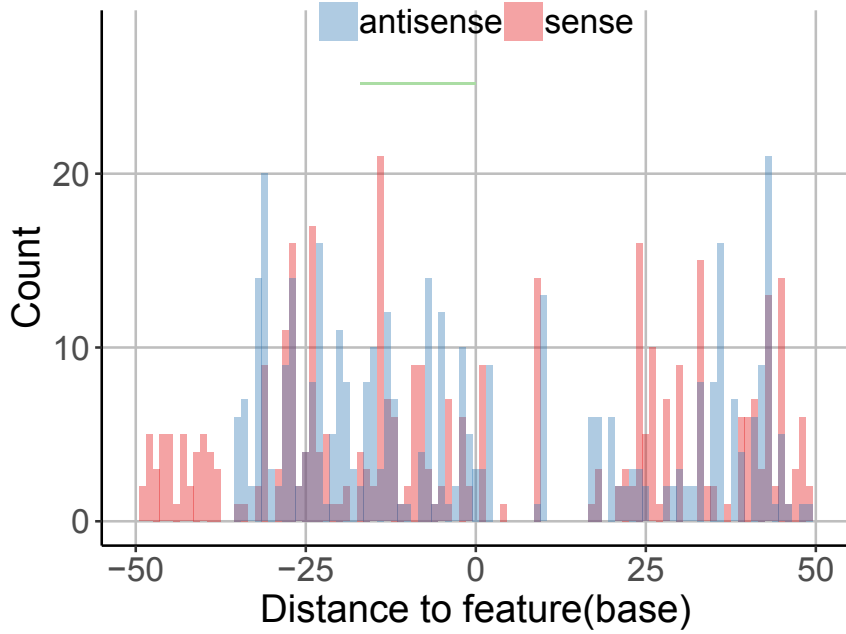

**YBX1-RCCAYRHCAUCGY**

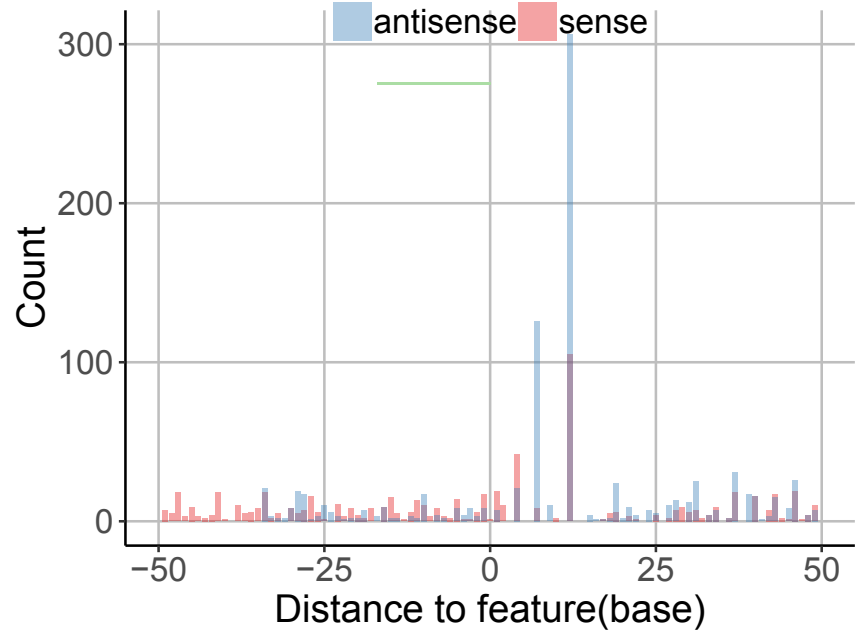

**ZC3H12A-NGCAGGUAAGUGCN**

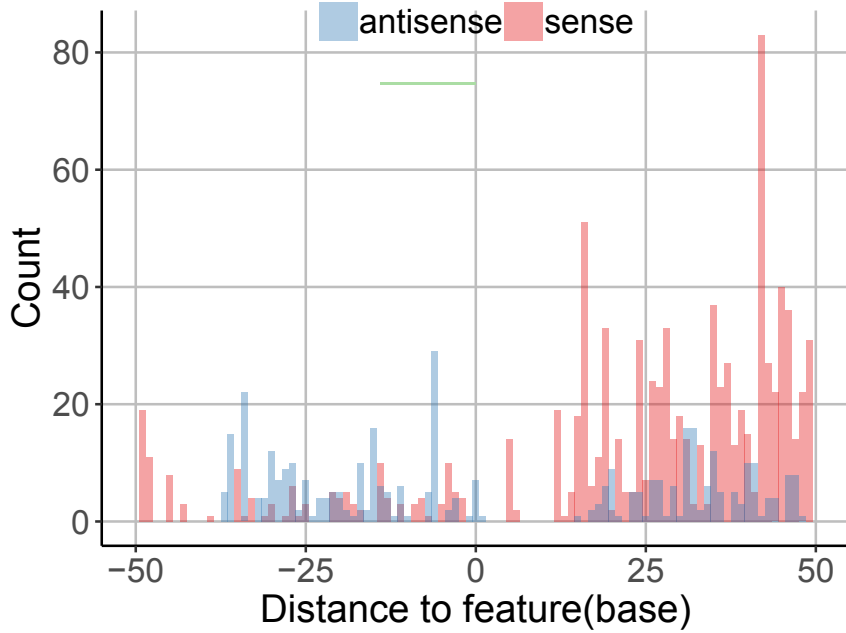

**ZC3H12B-NGCAGGUAAGUGSN**

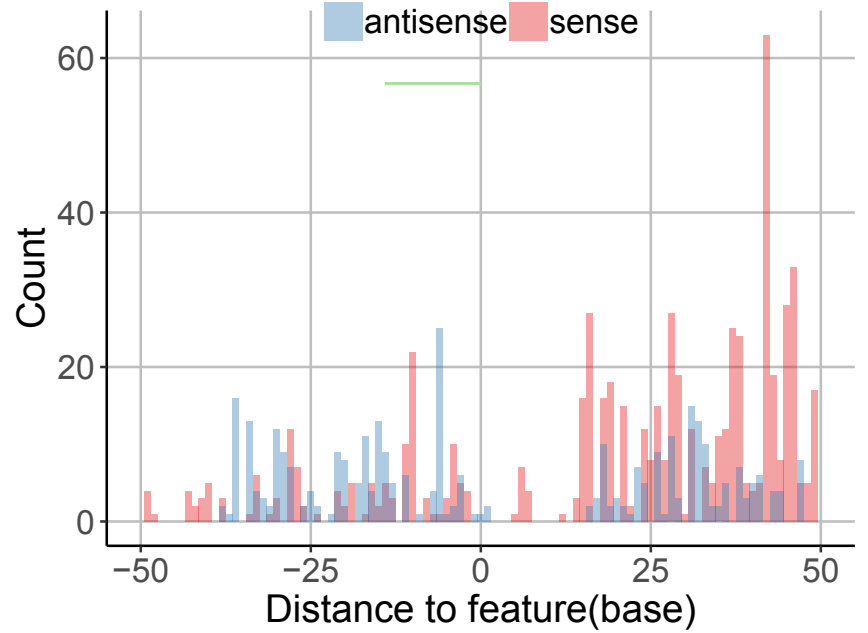

**ZC3H12B-SCAGGUAUUAUGS**

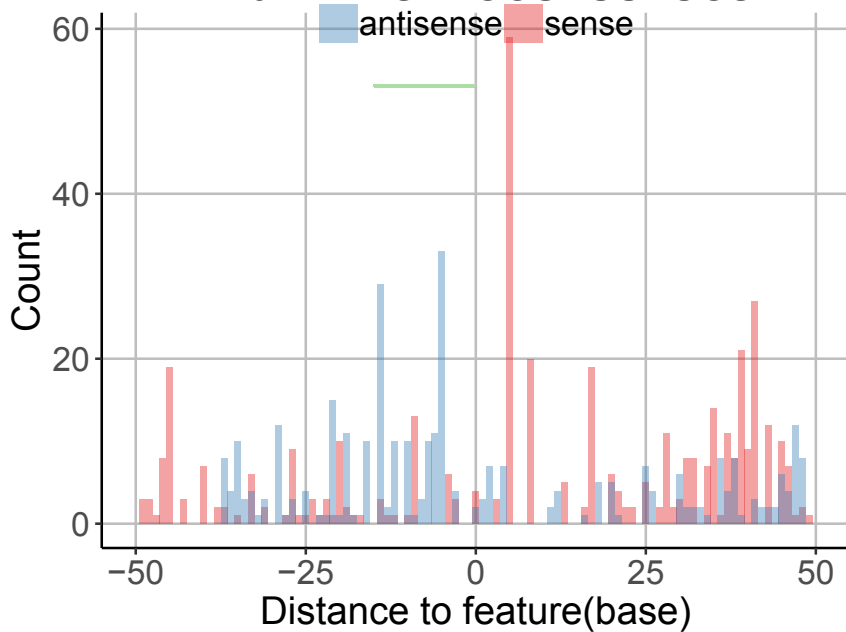

7

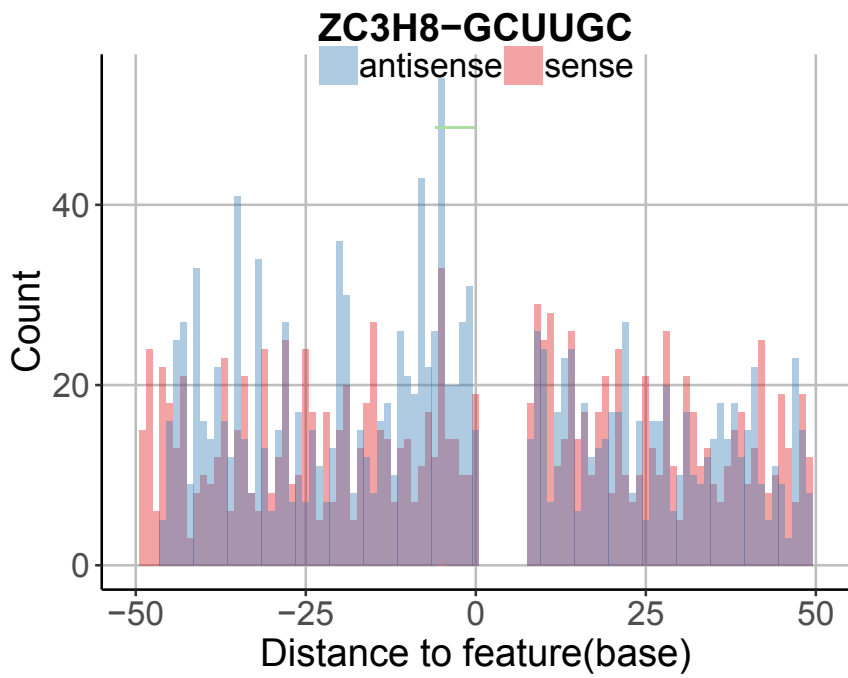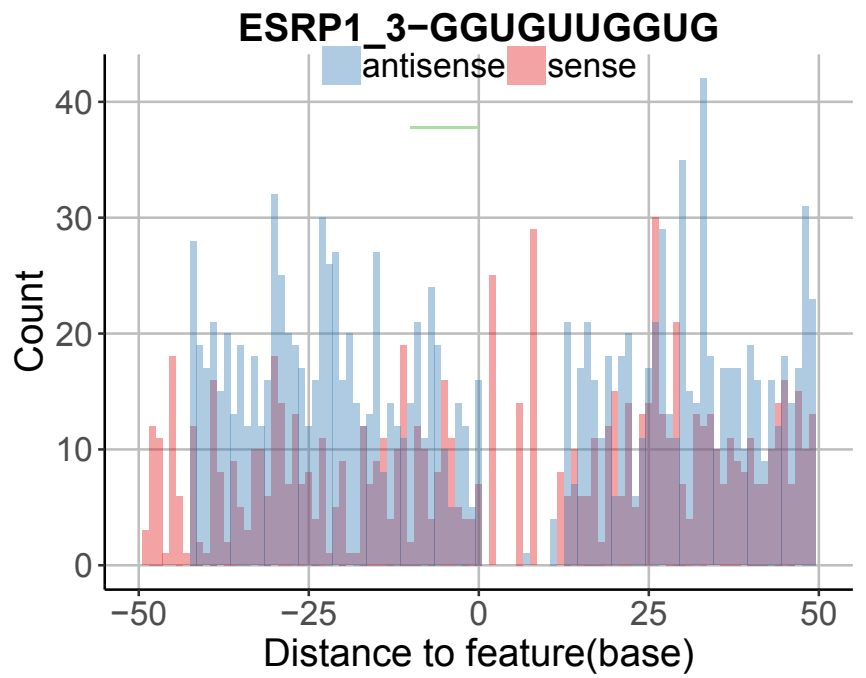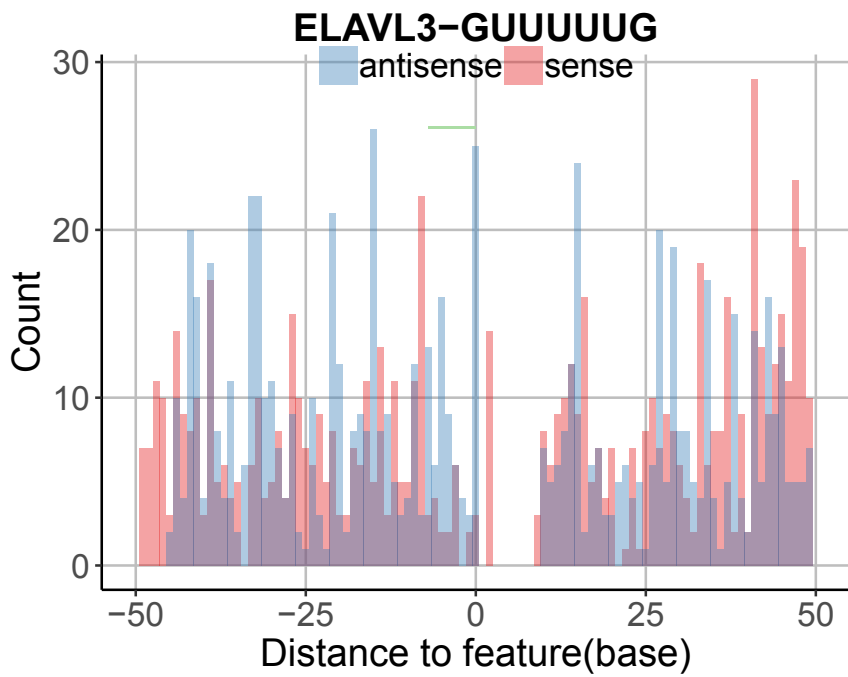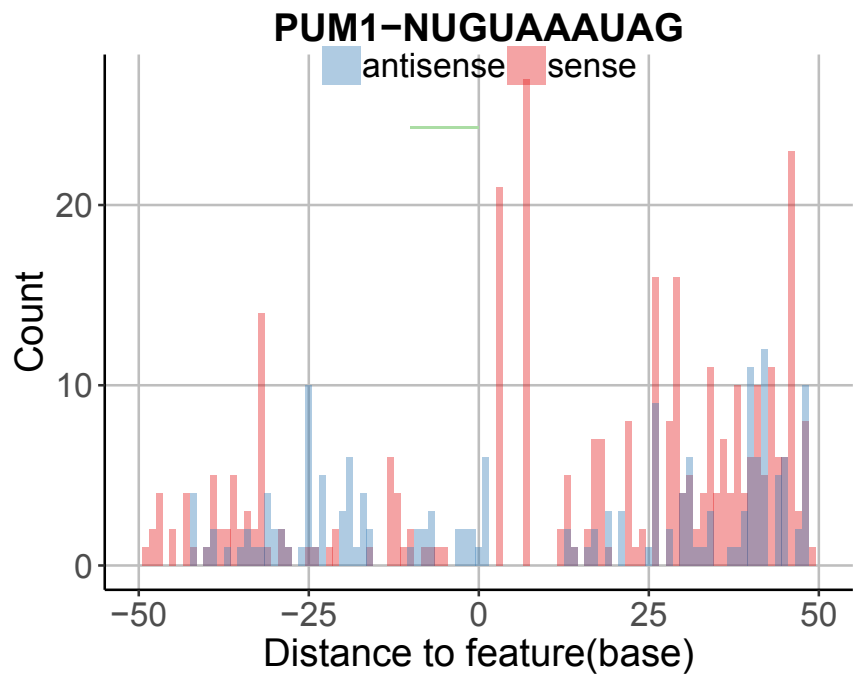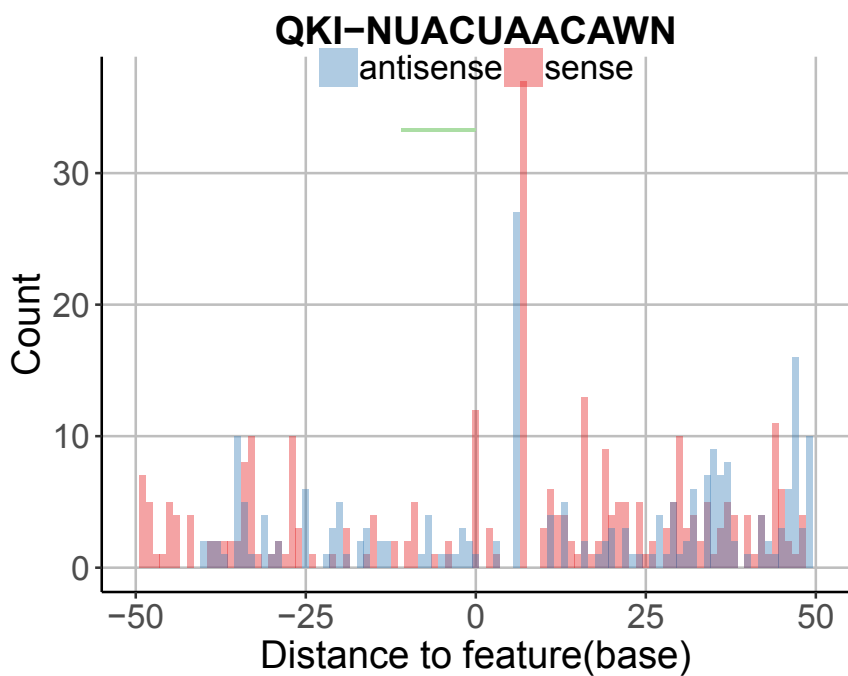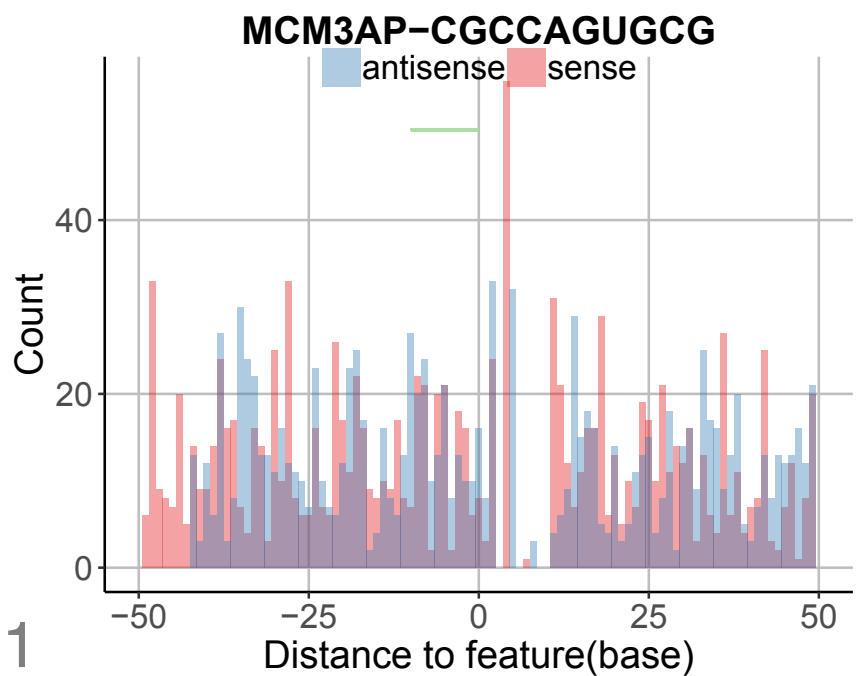

1

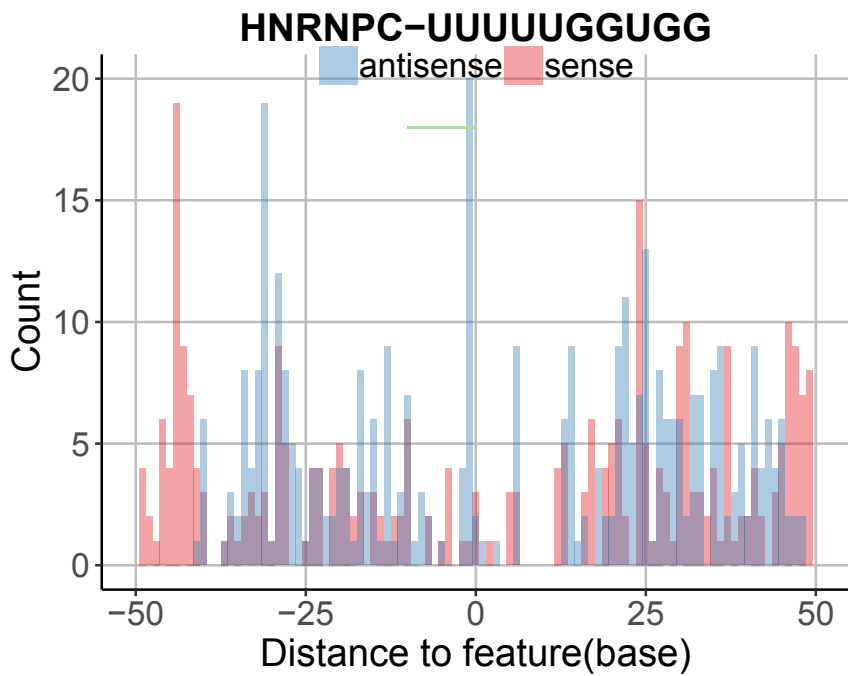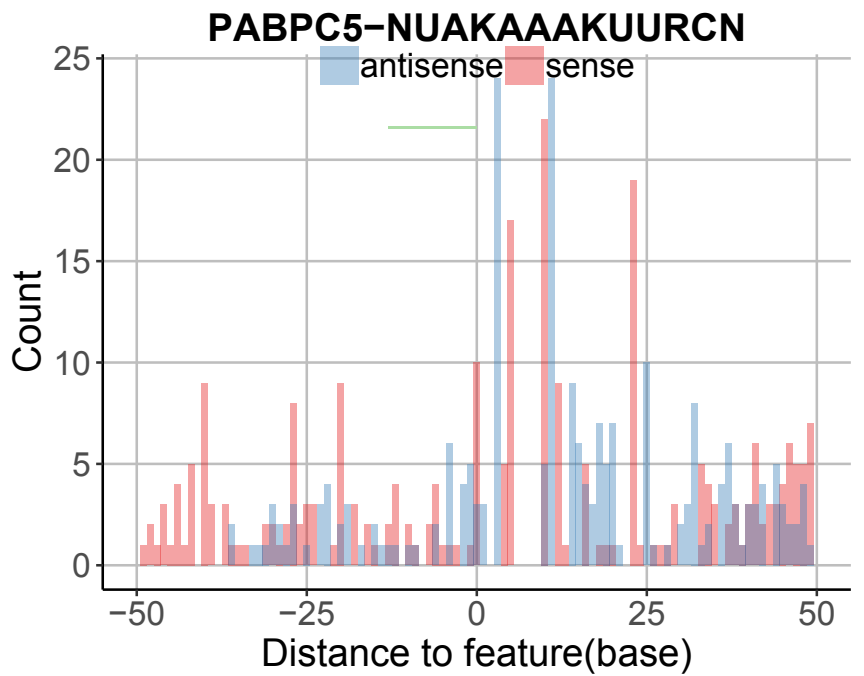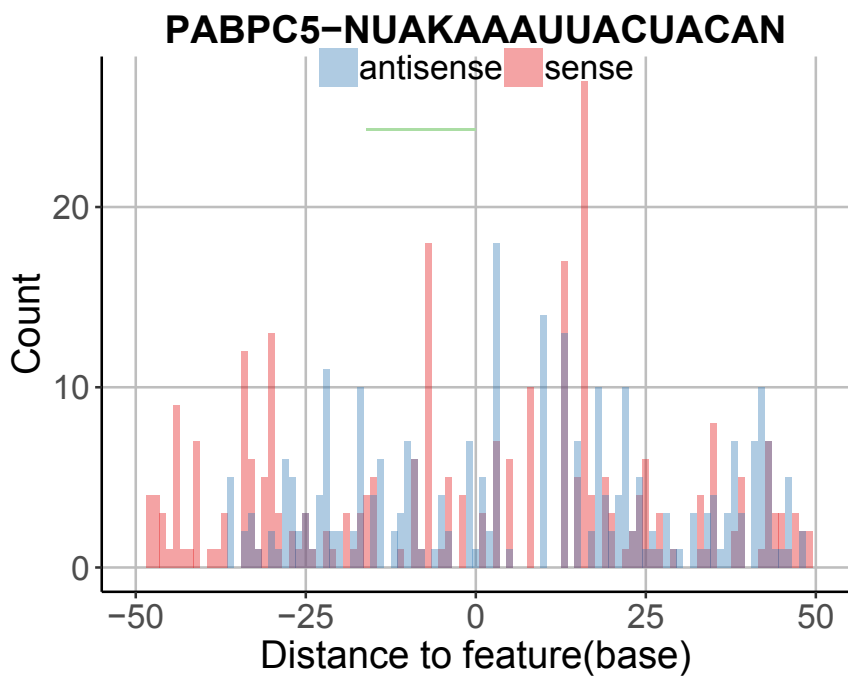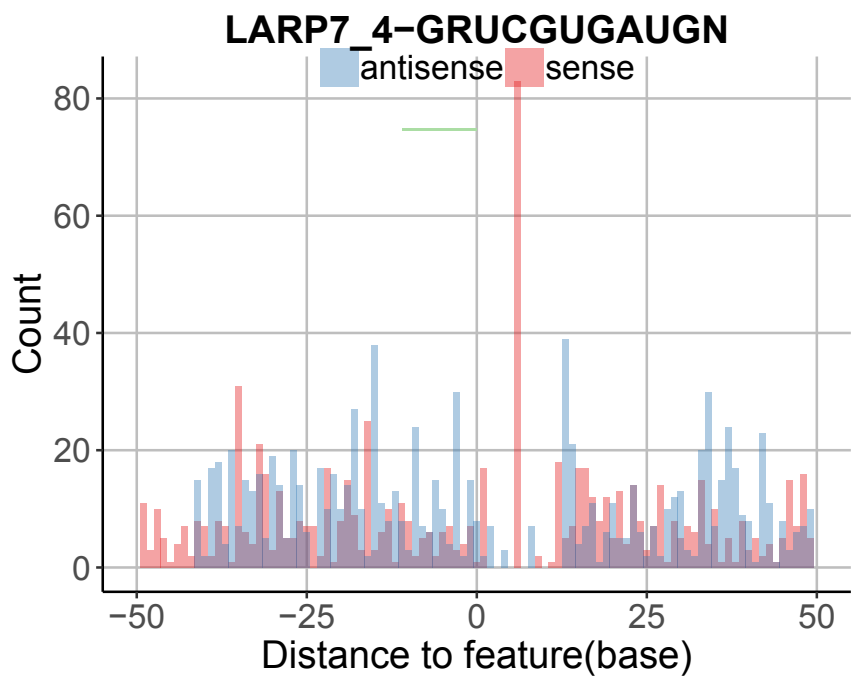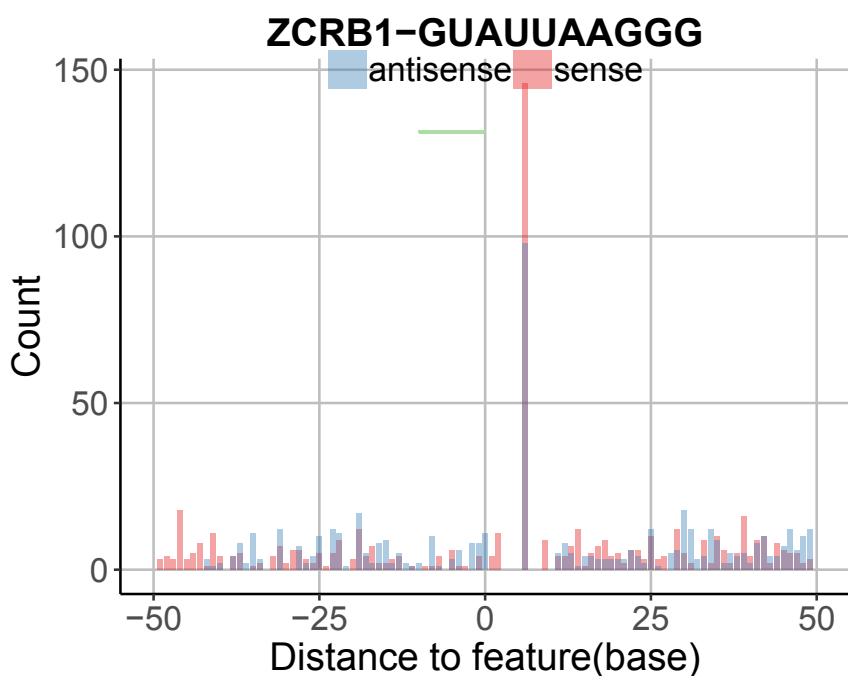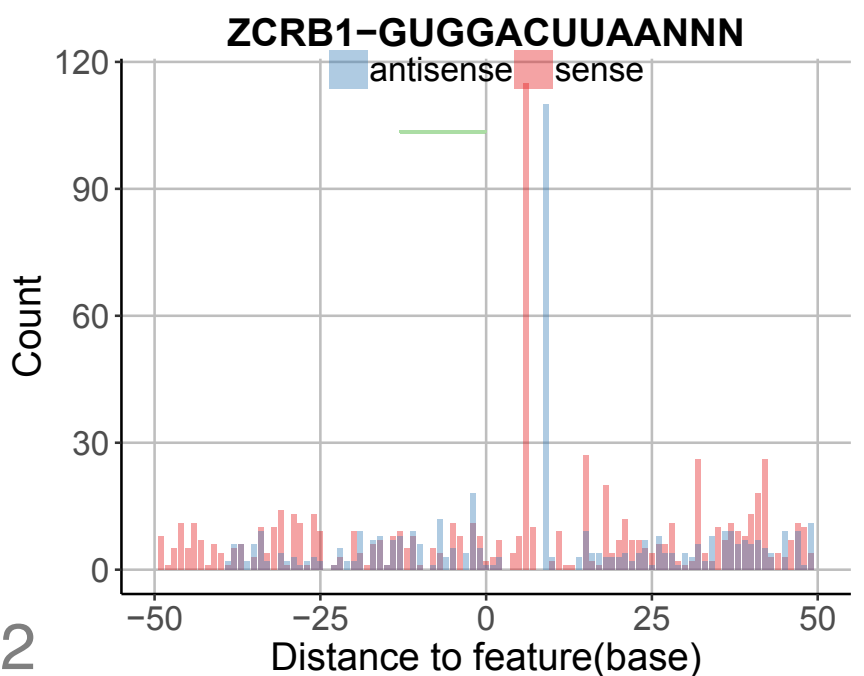

2

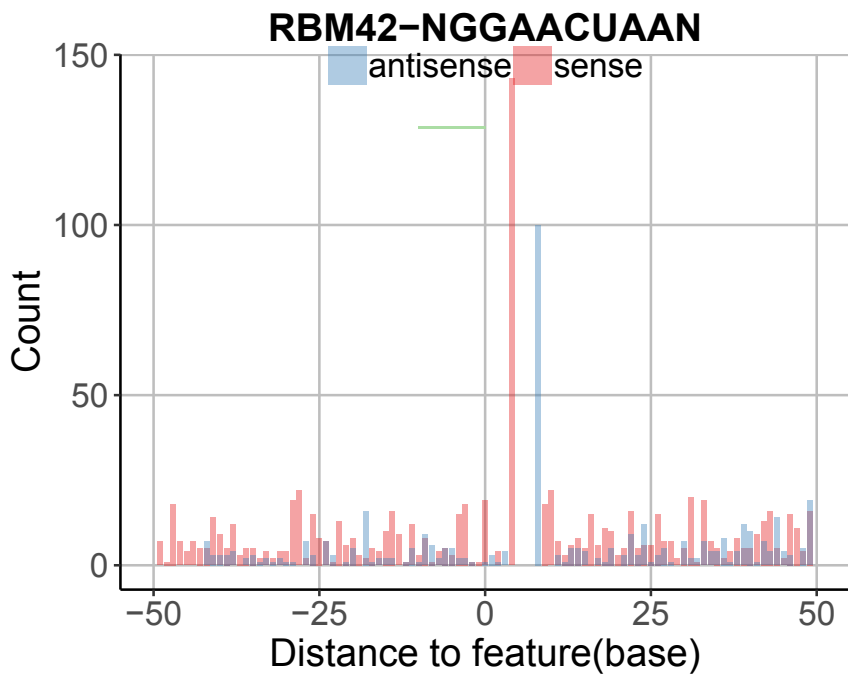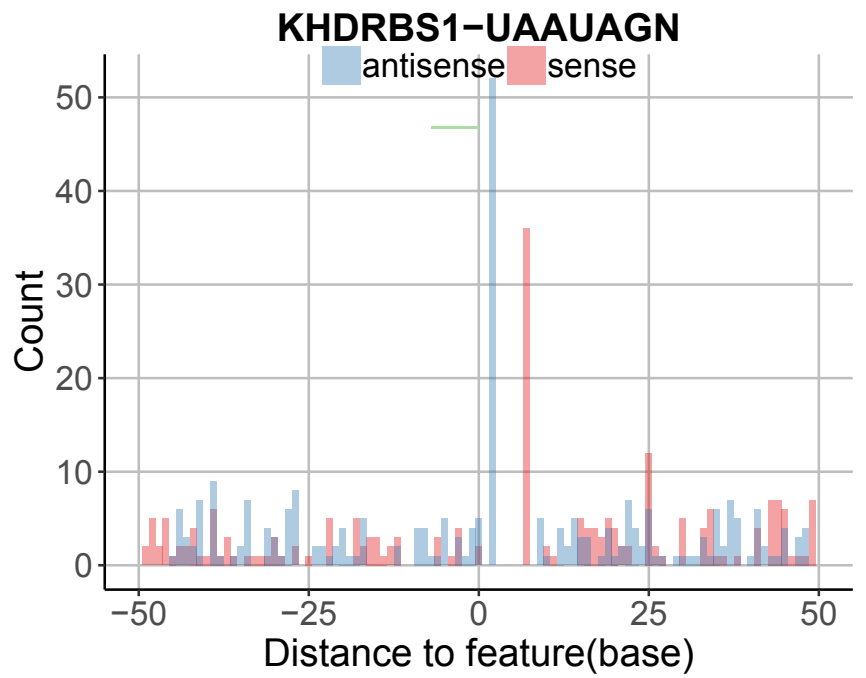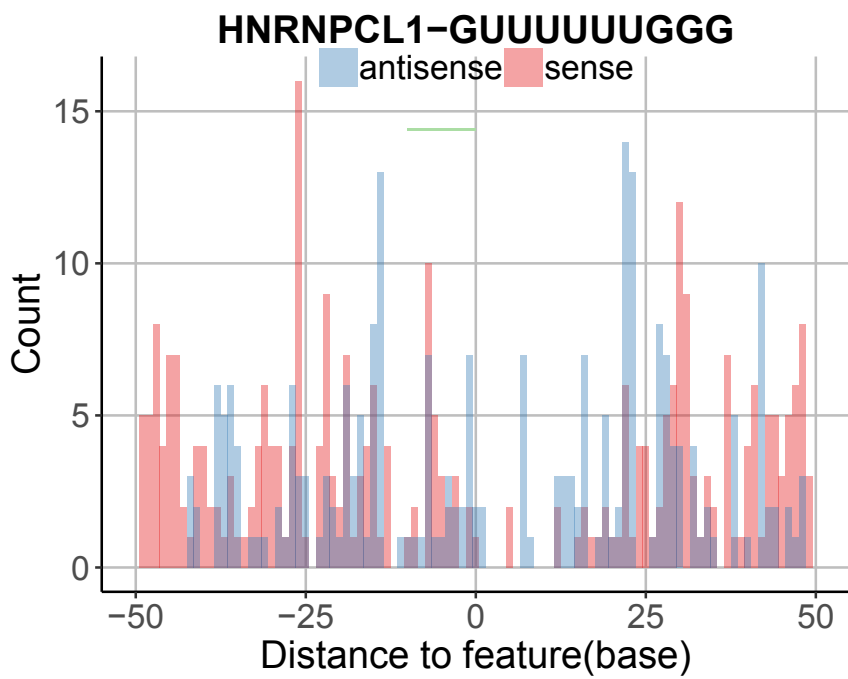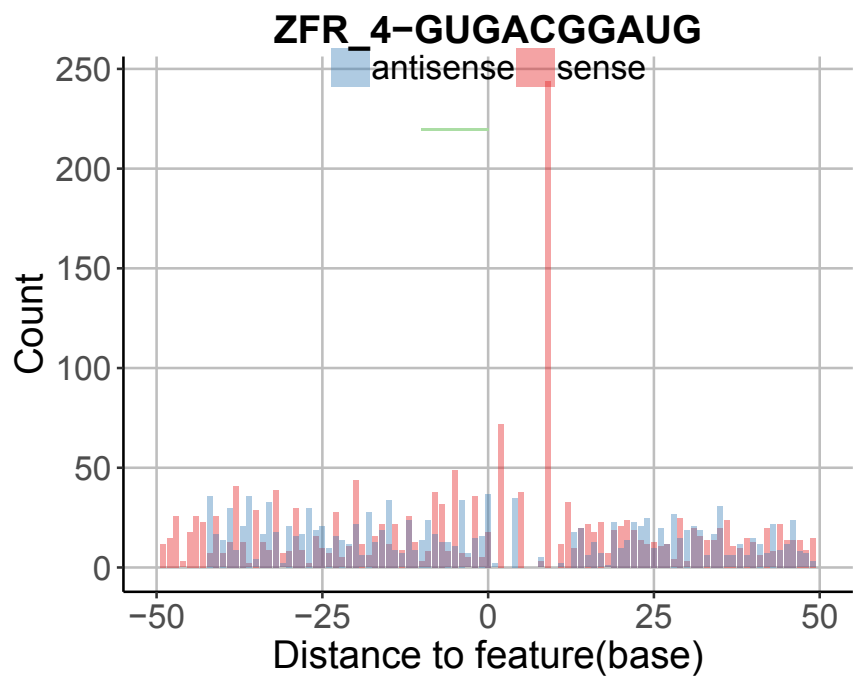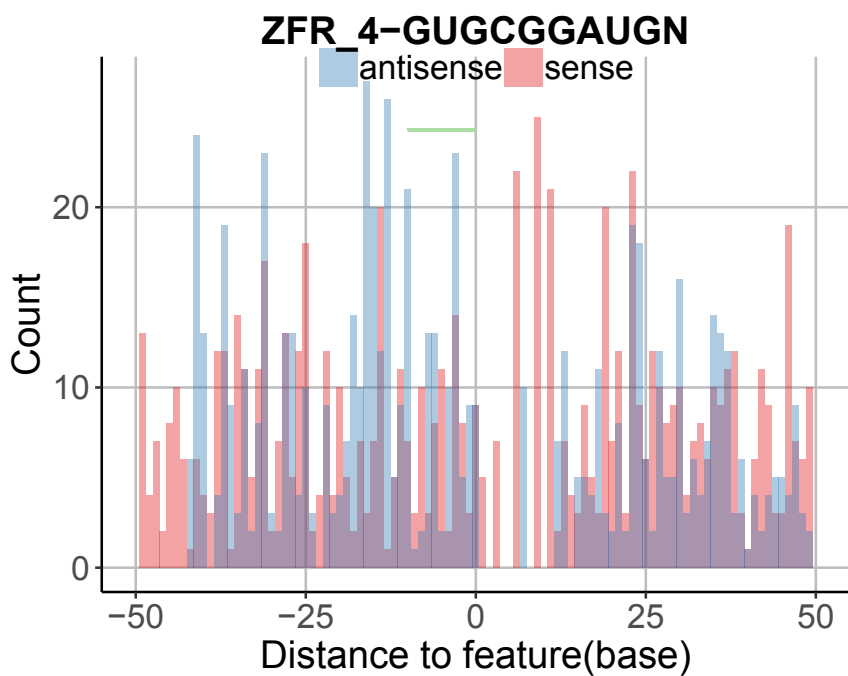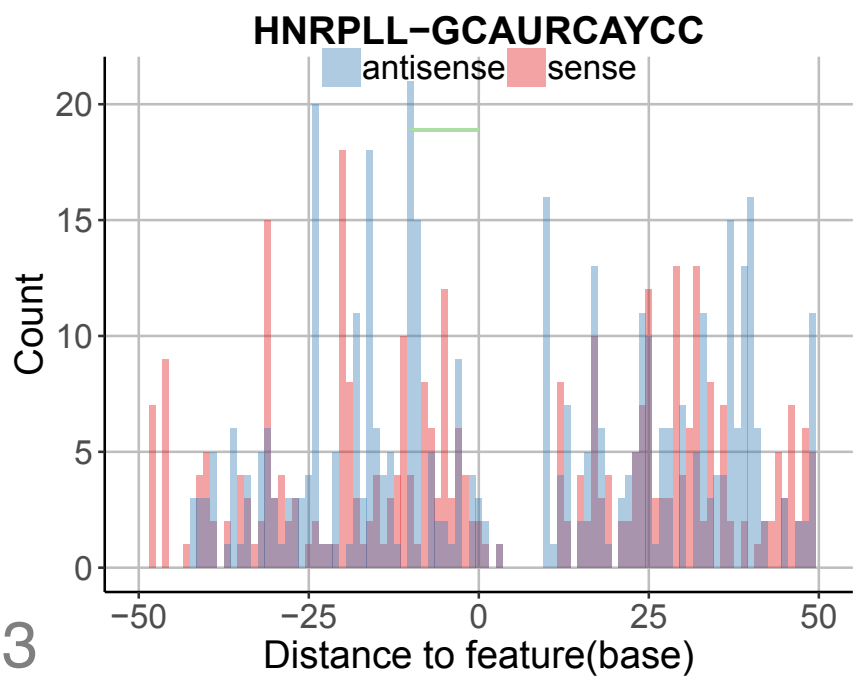

3

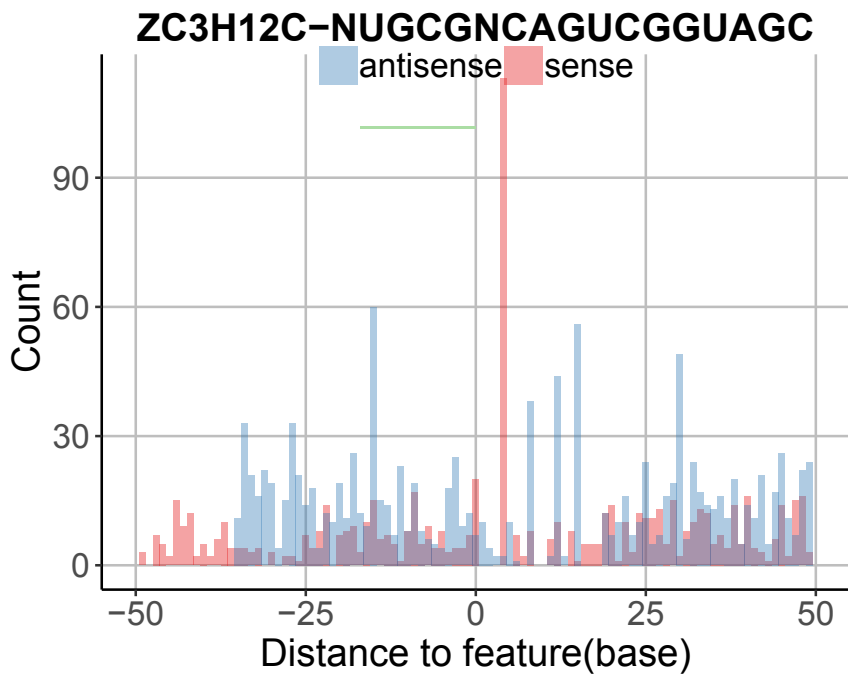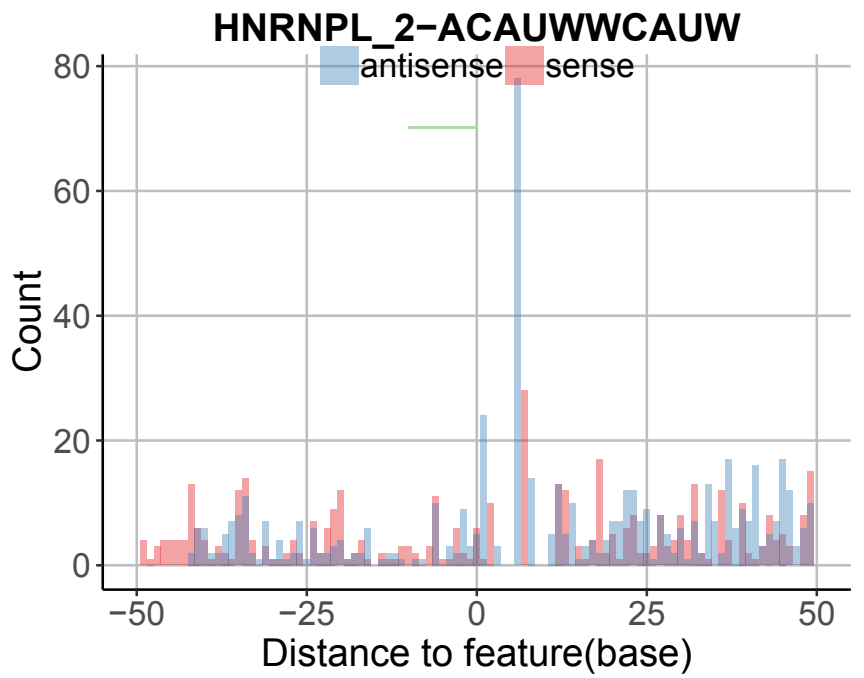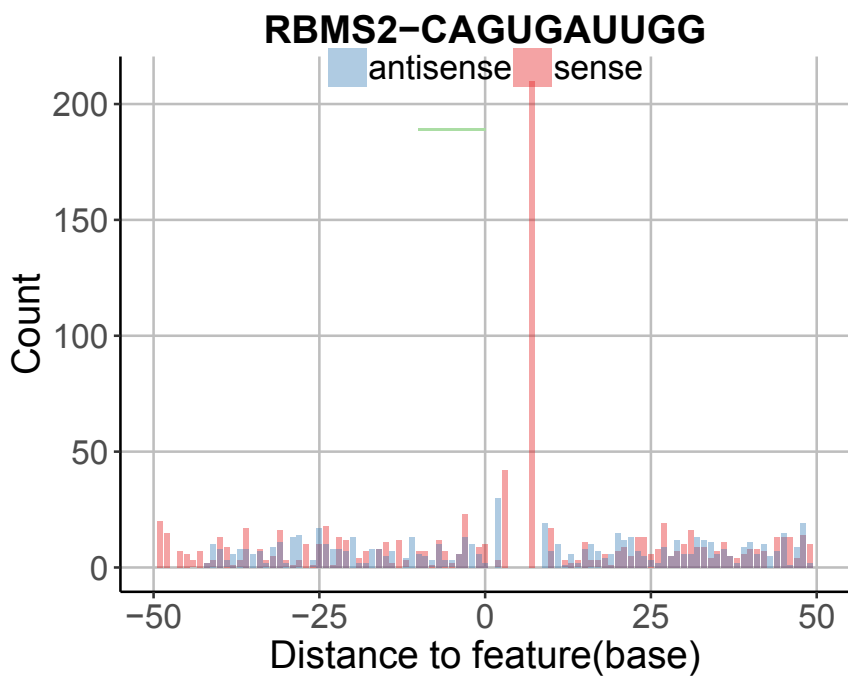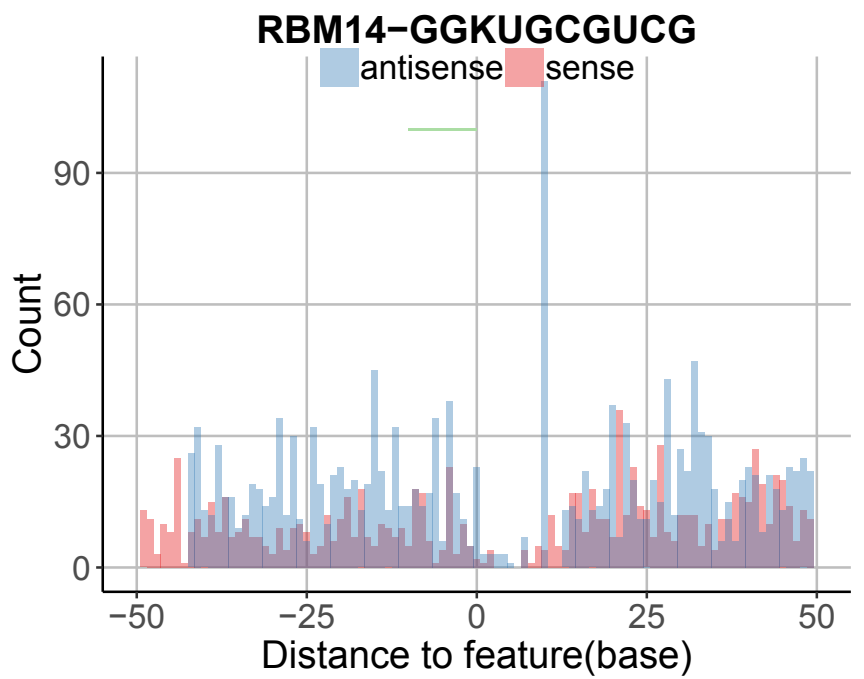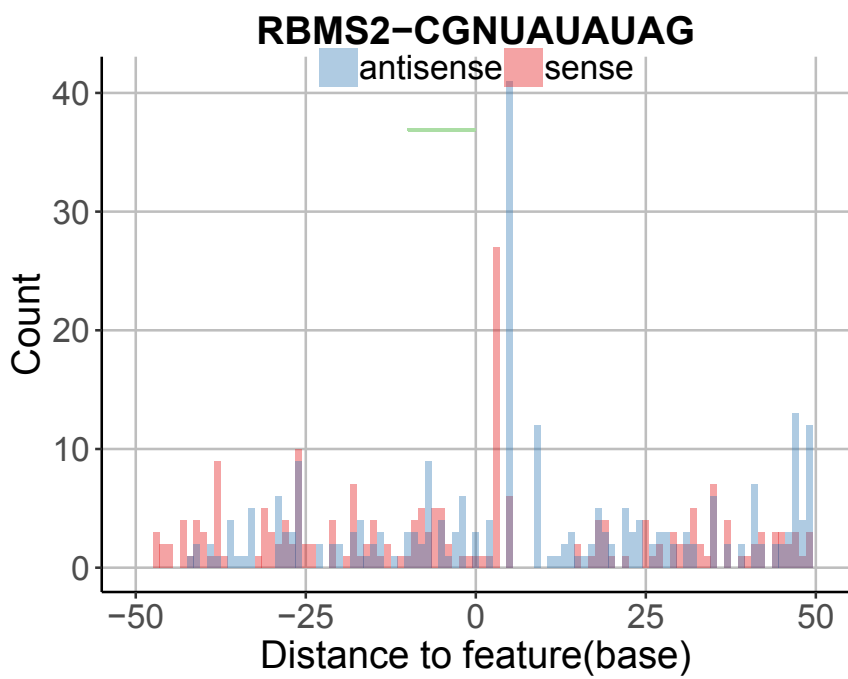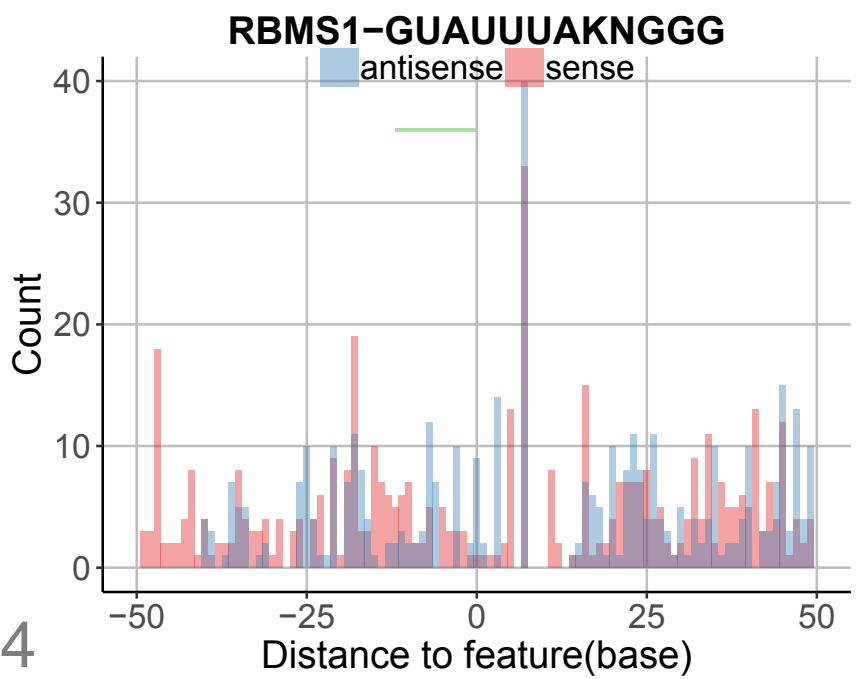

4

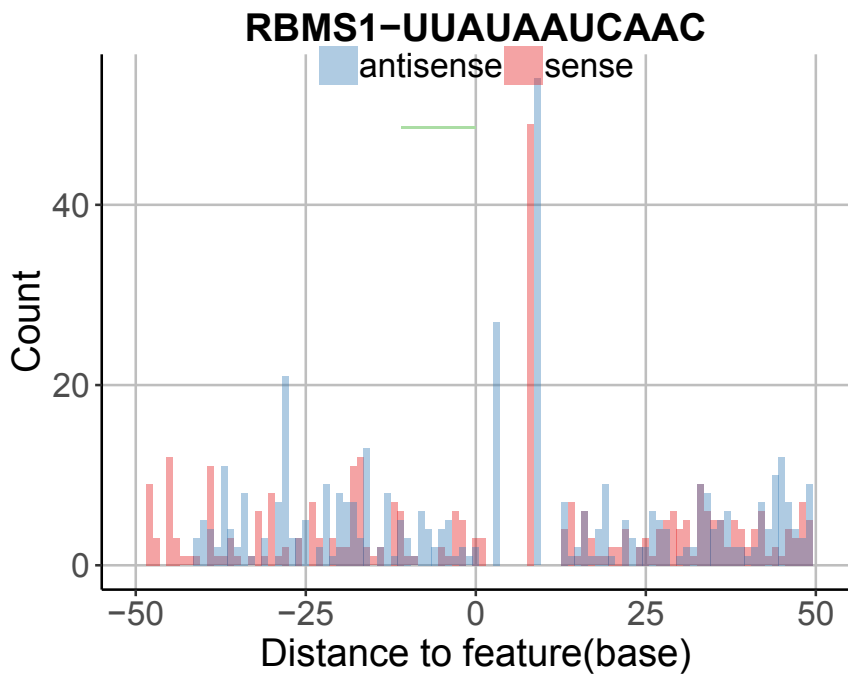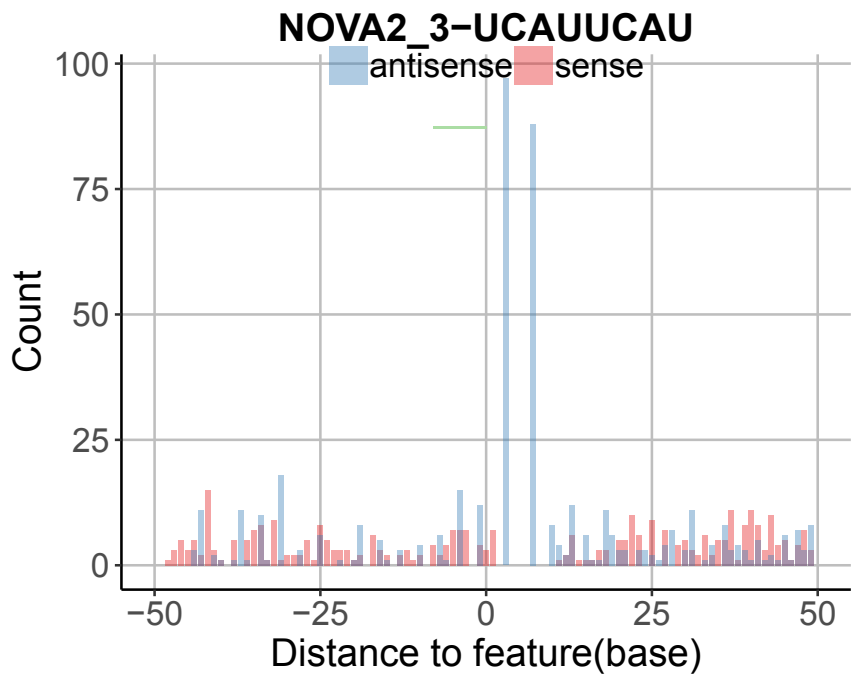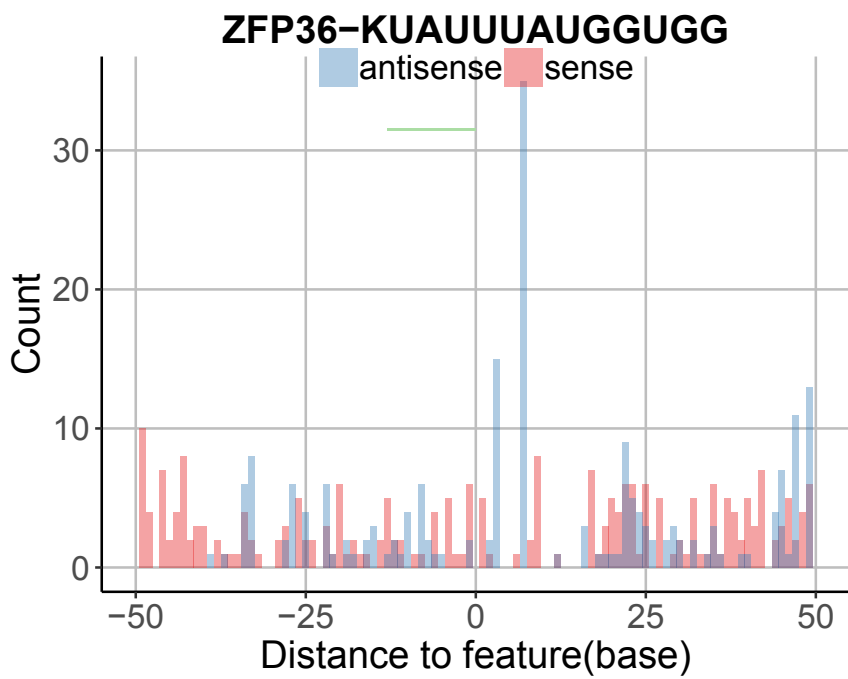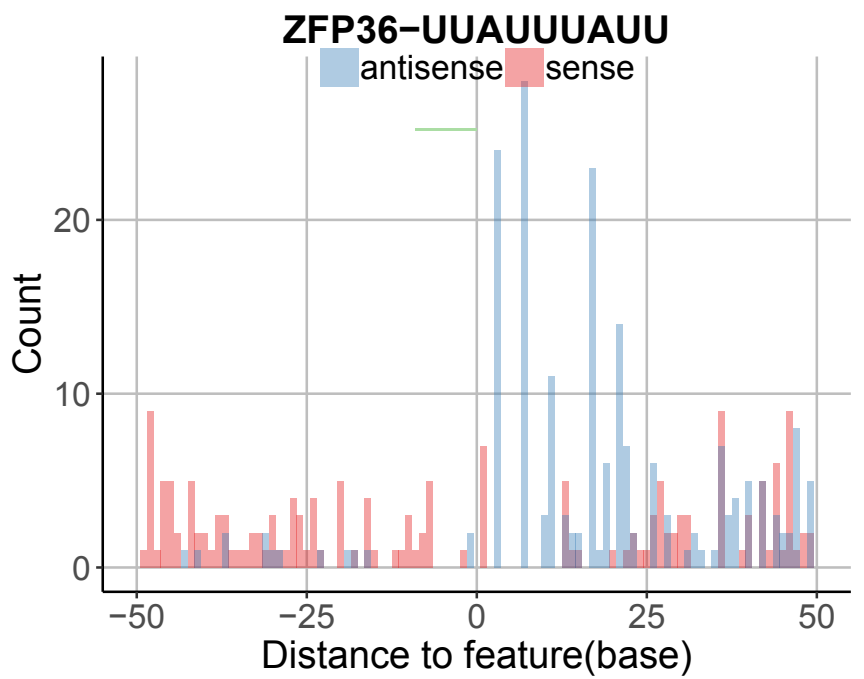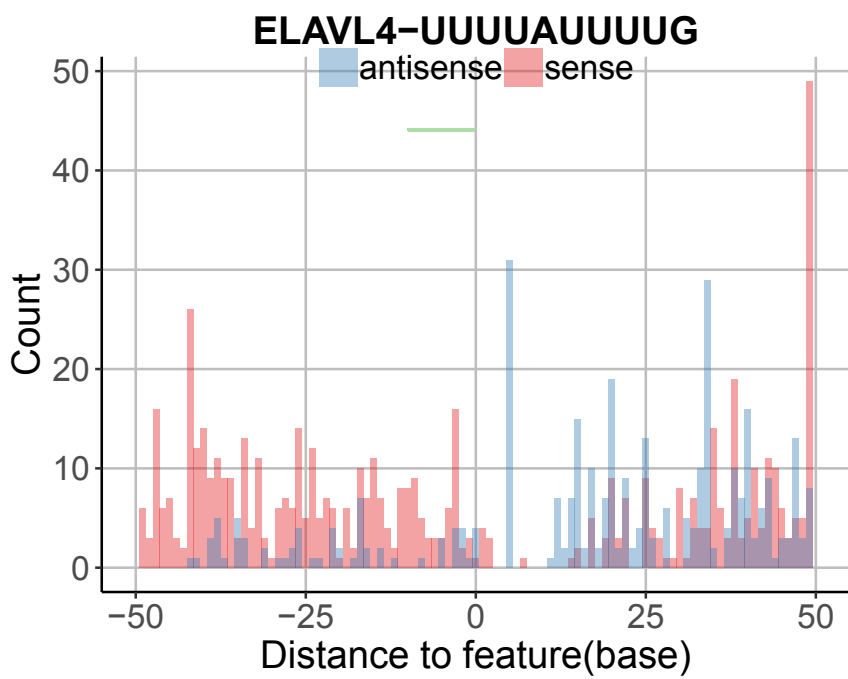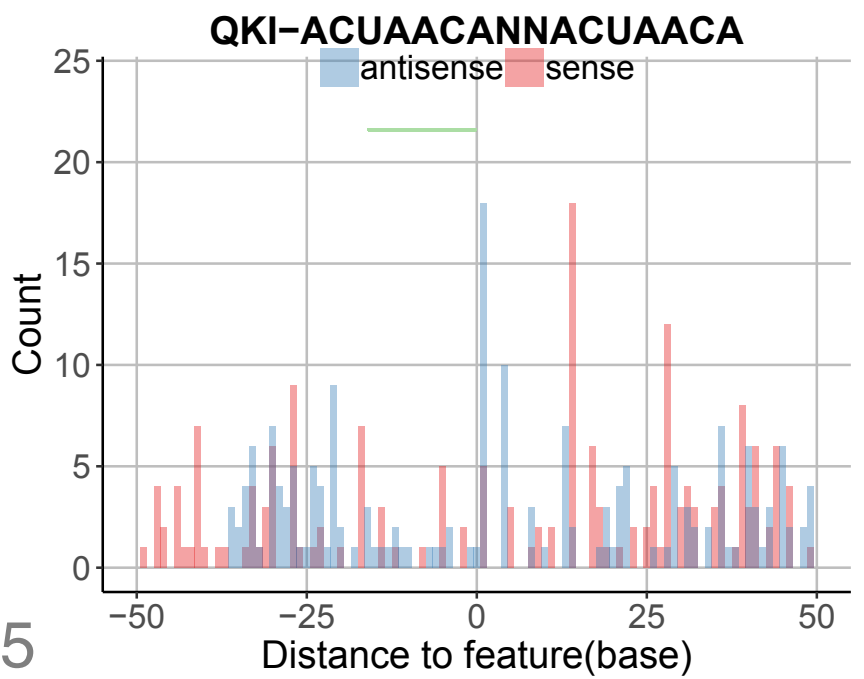

5

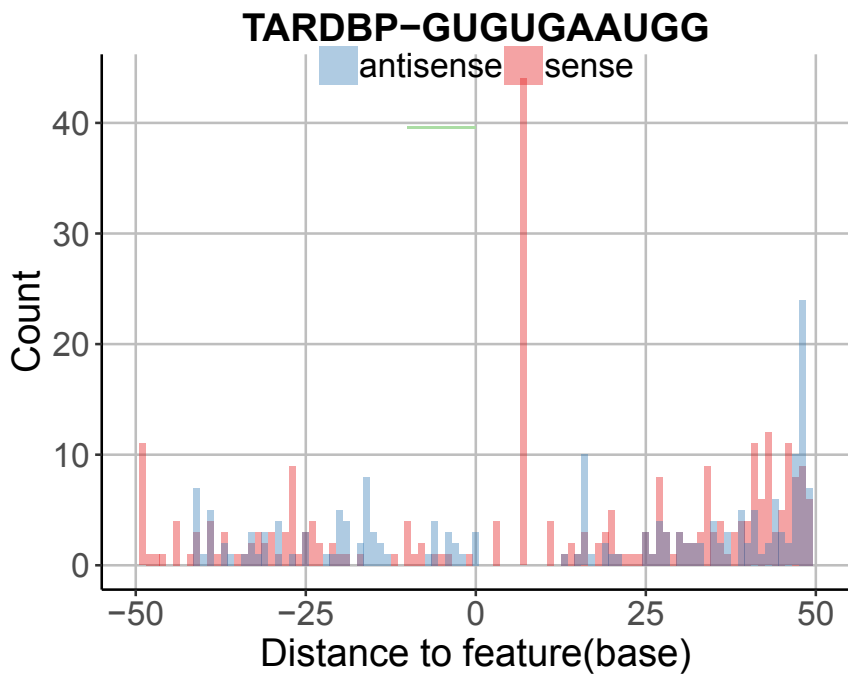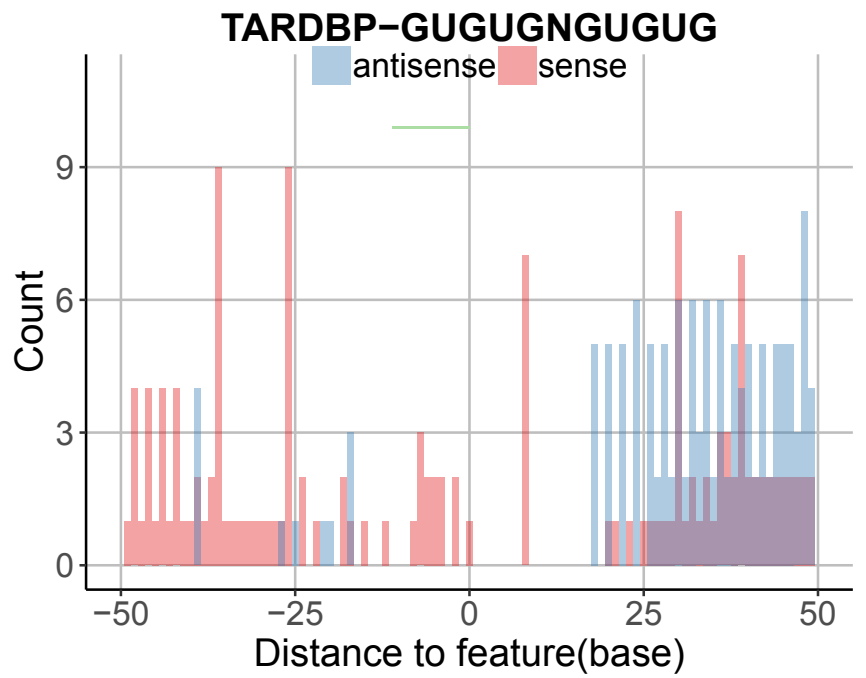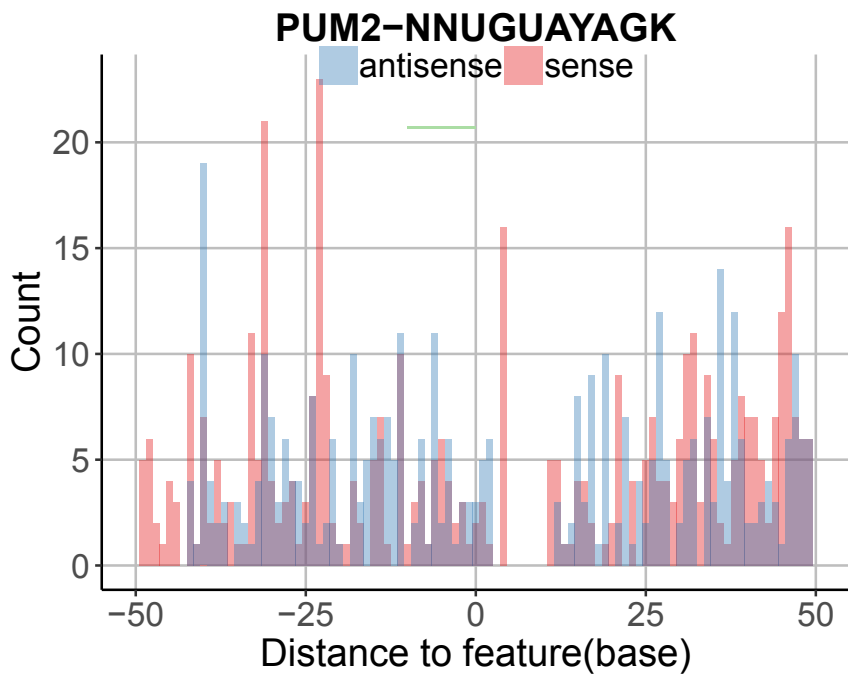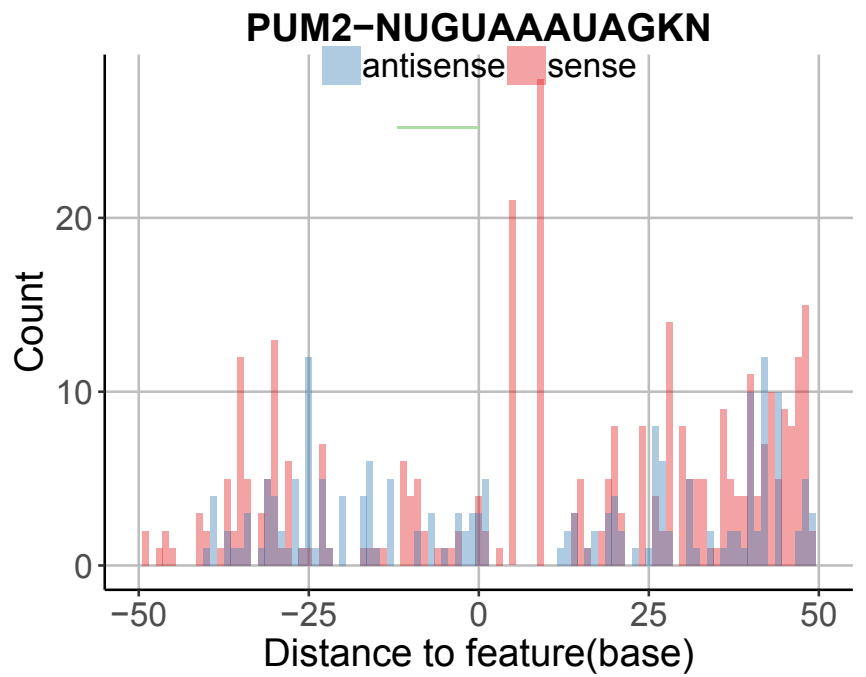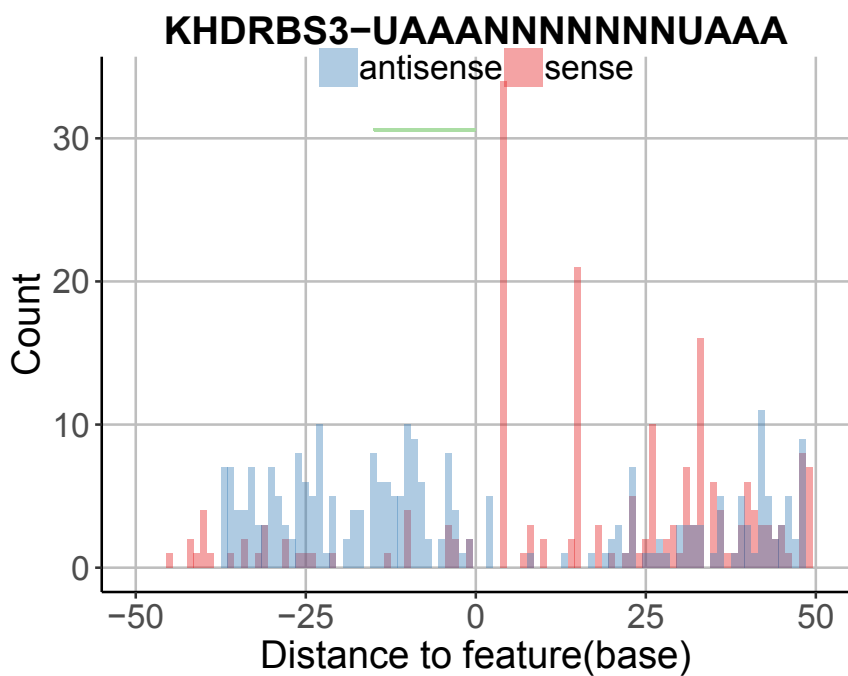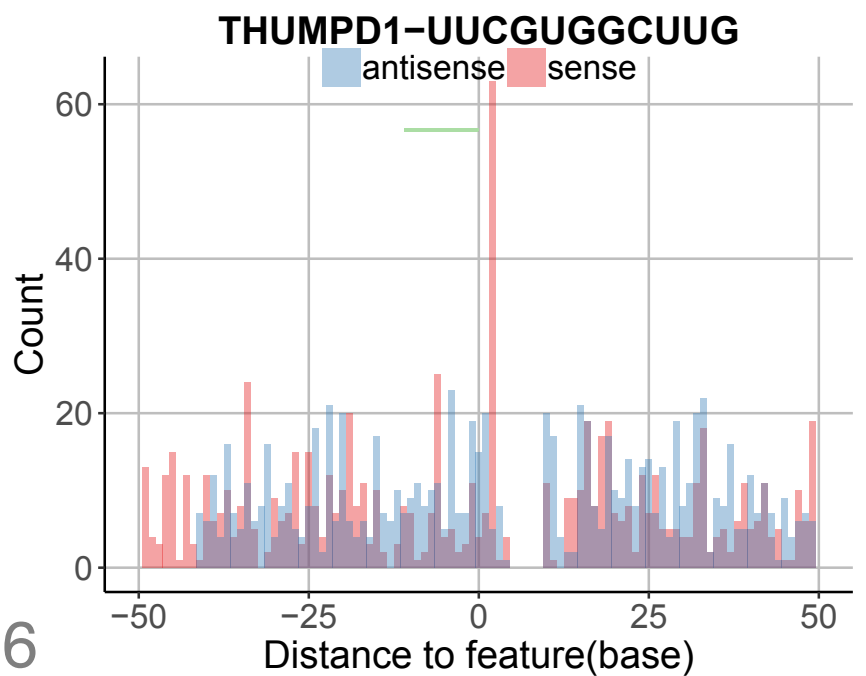

6

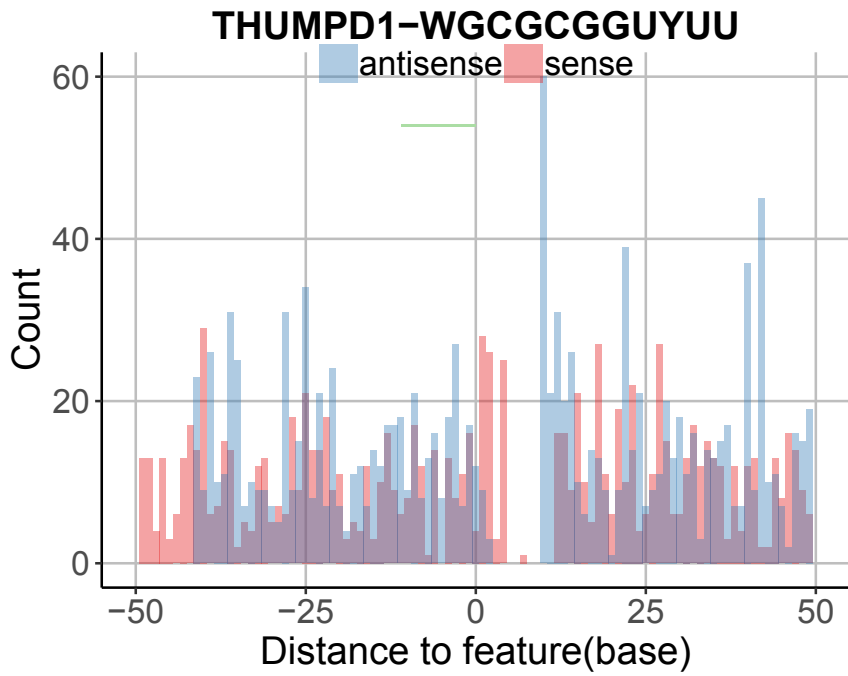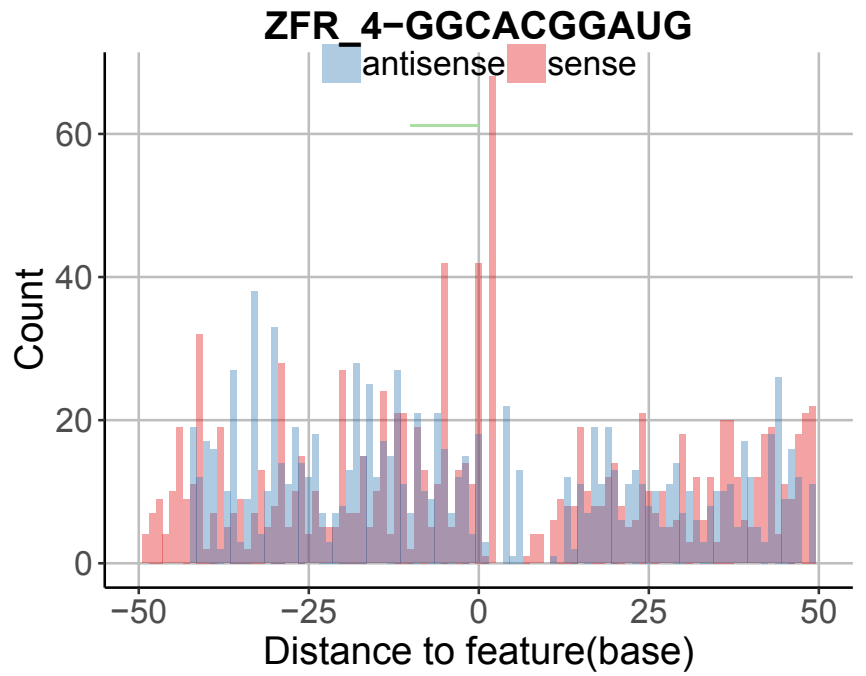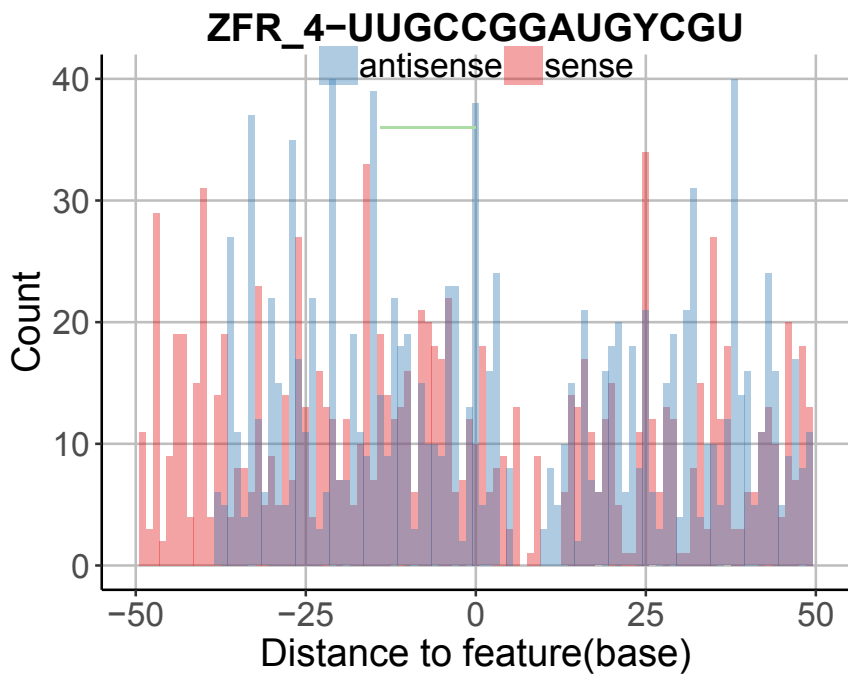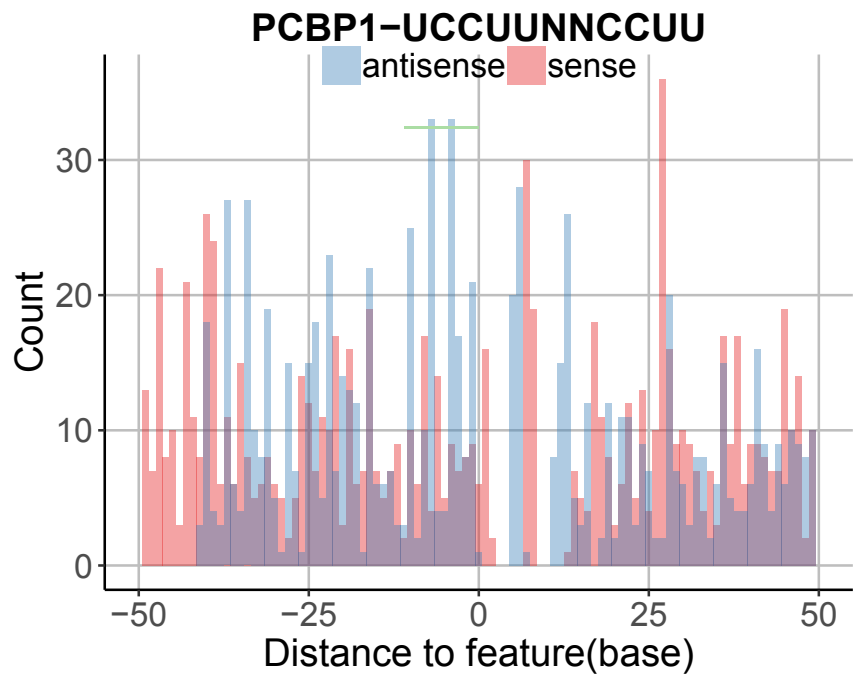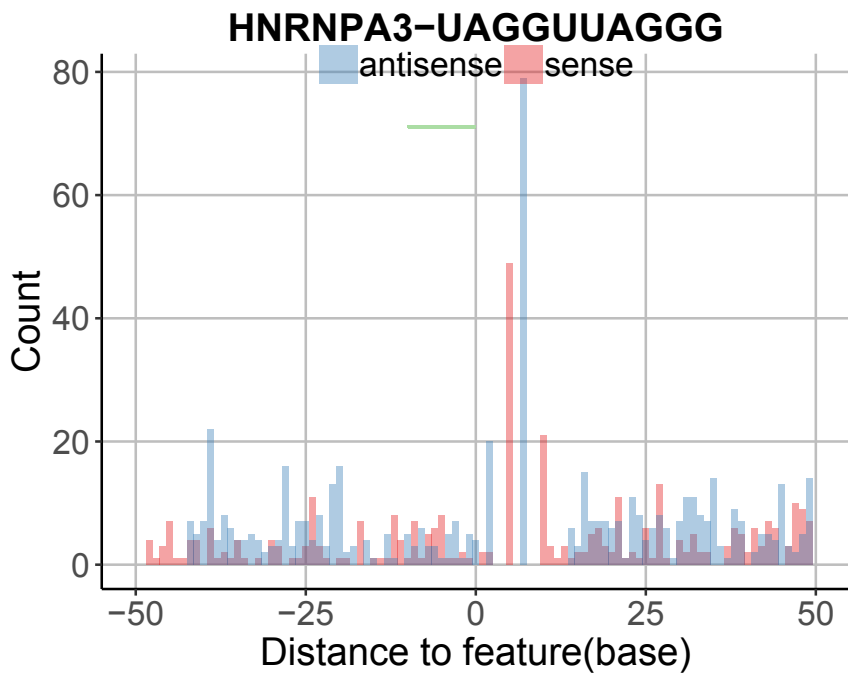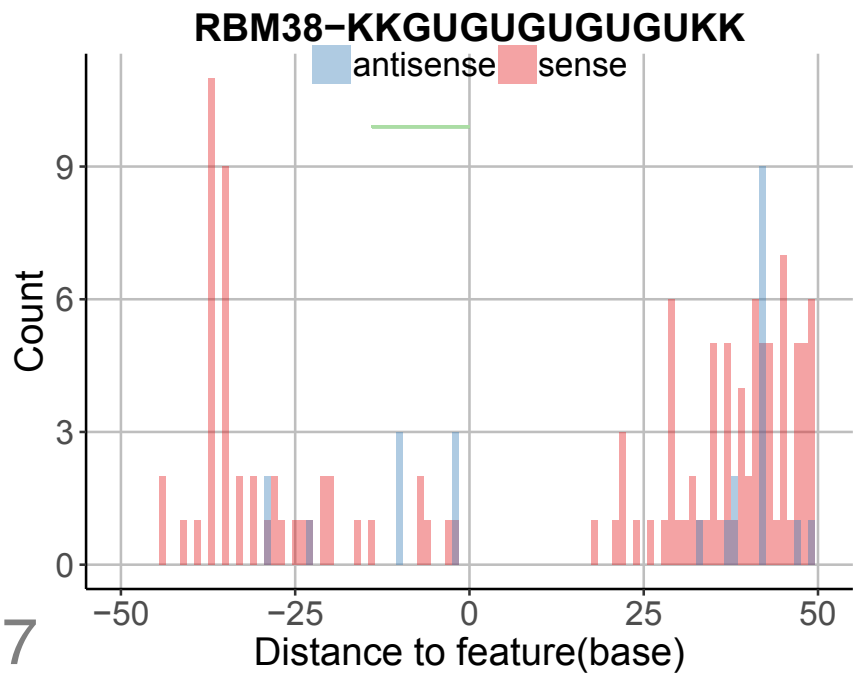

7



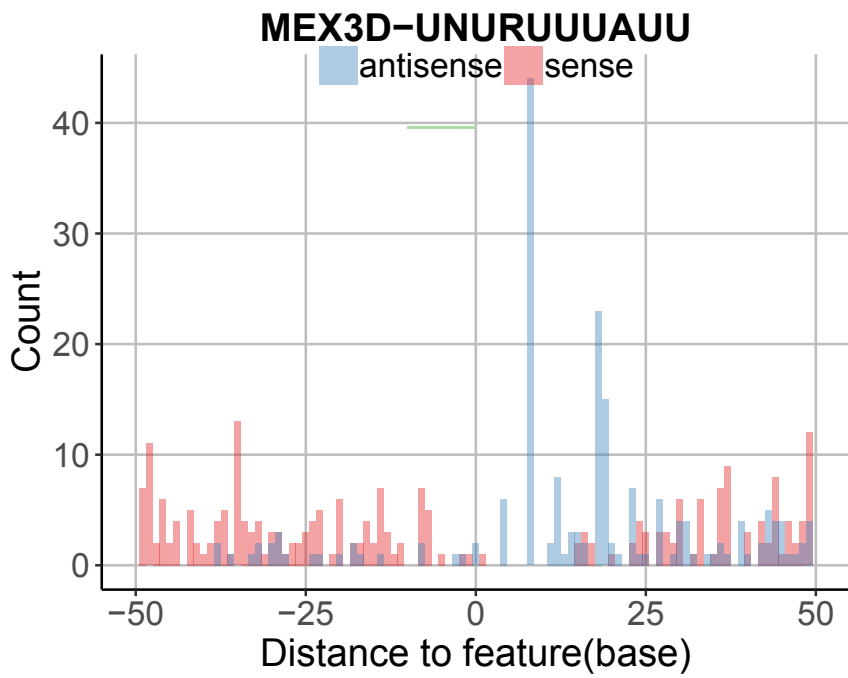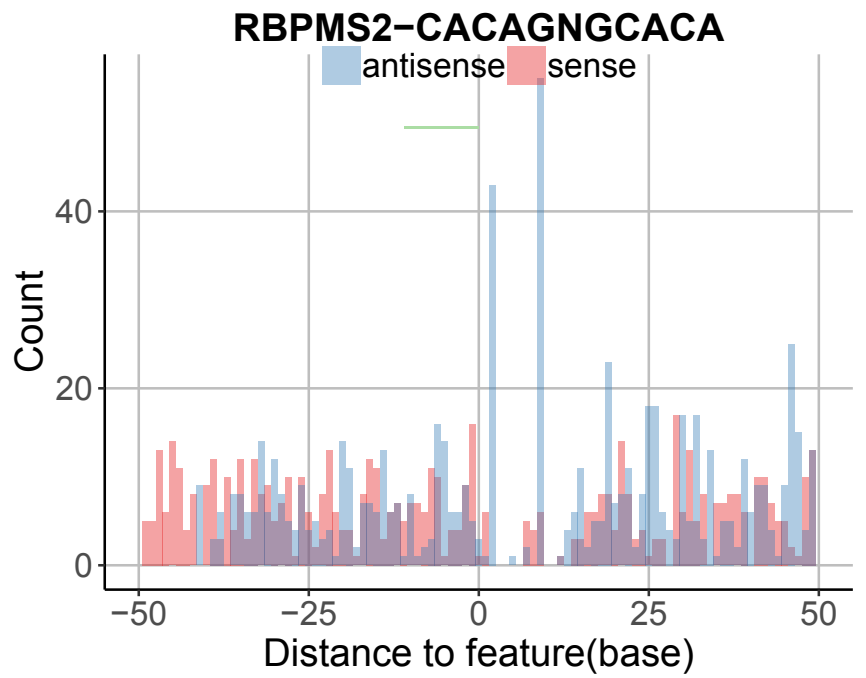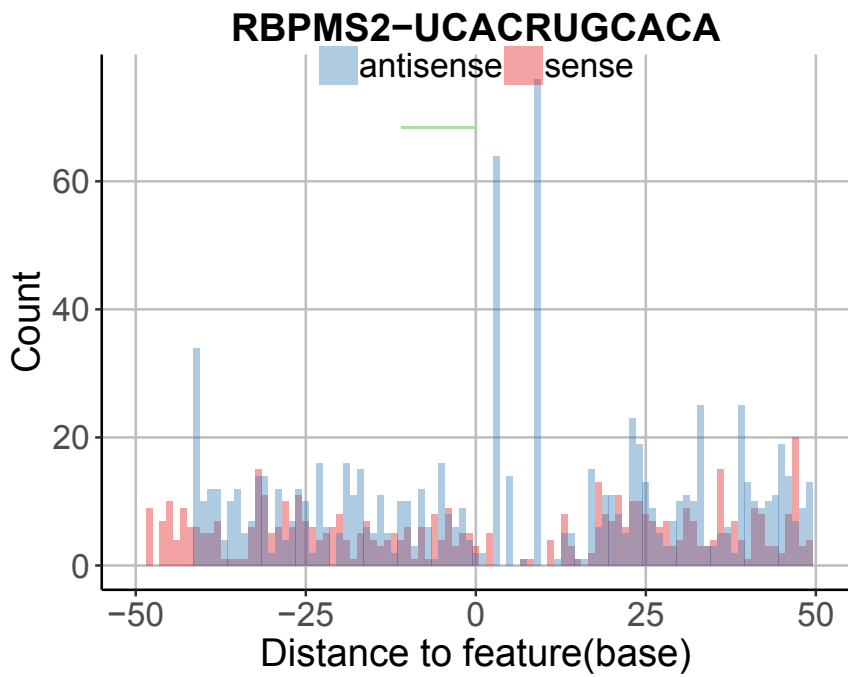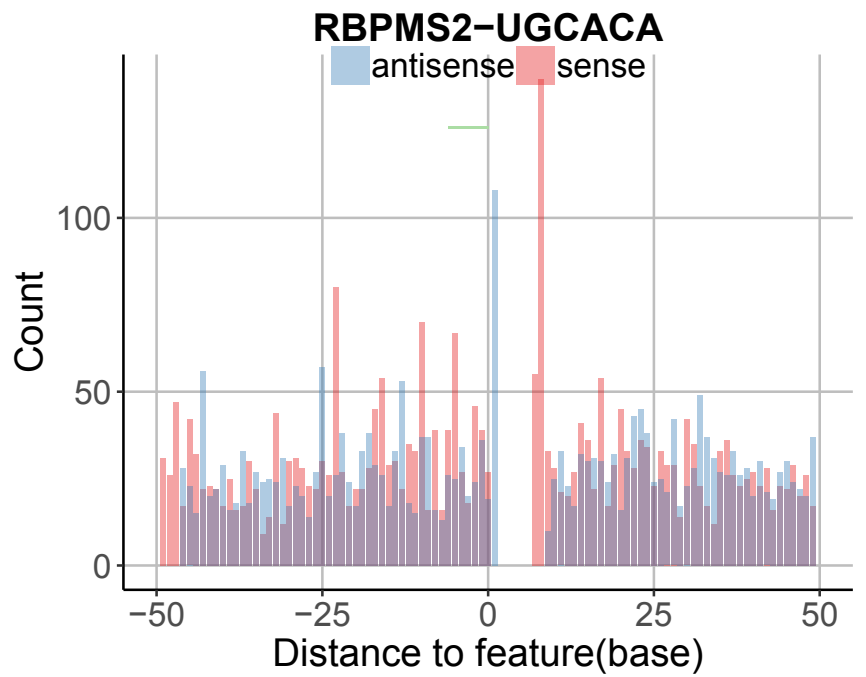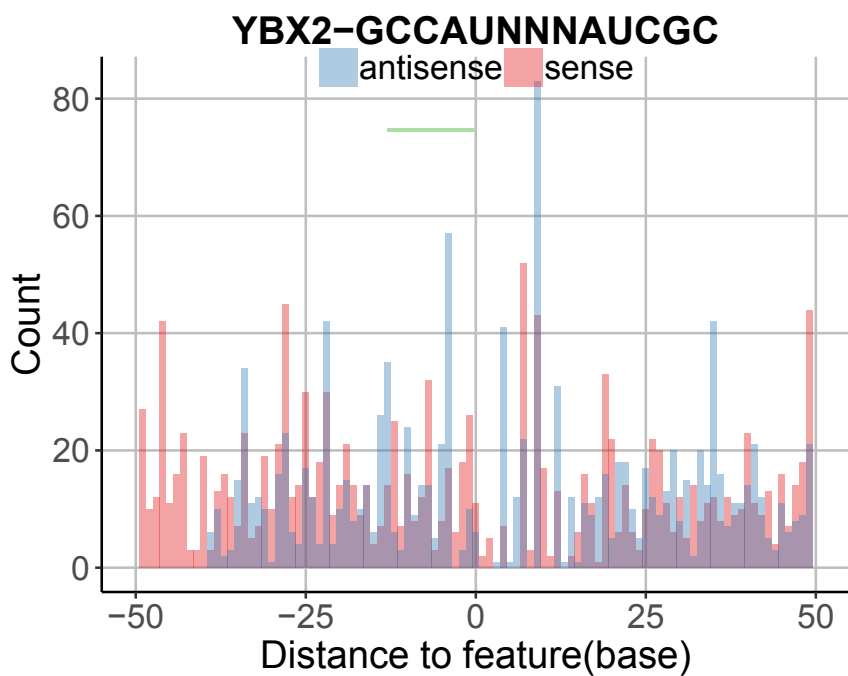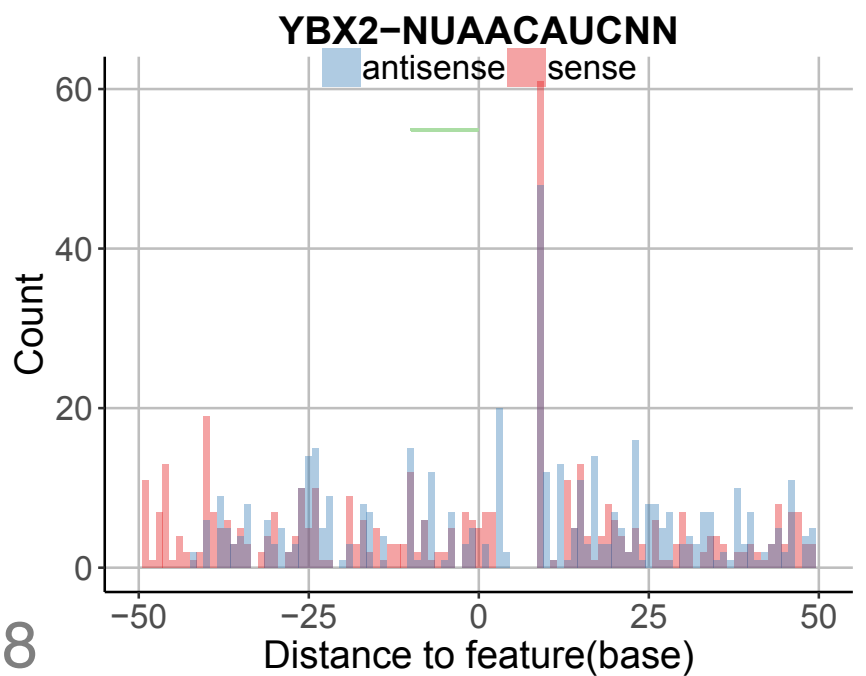

8

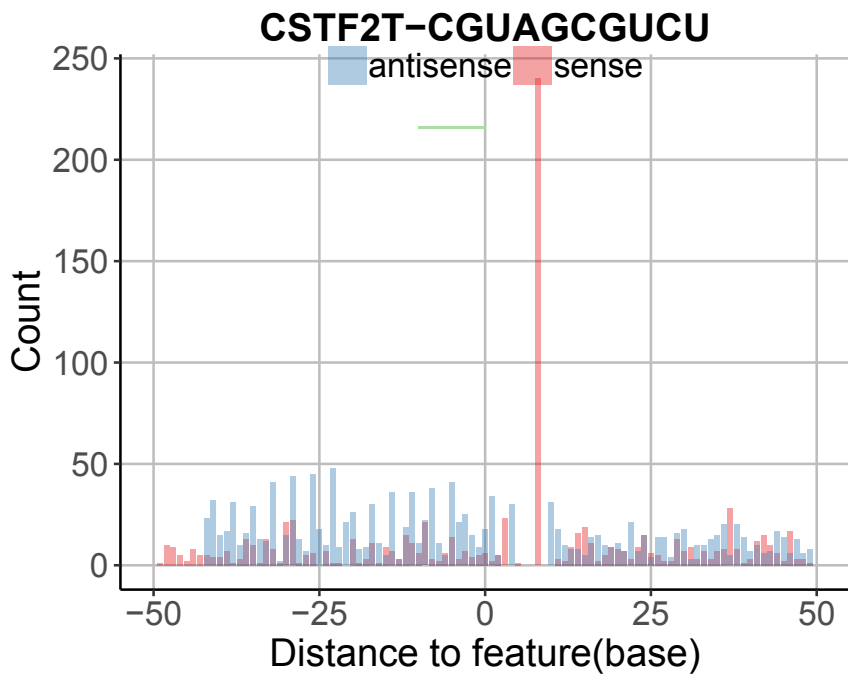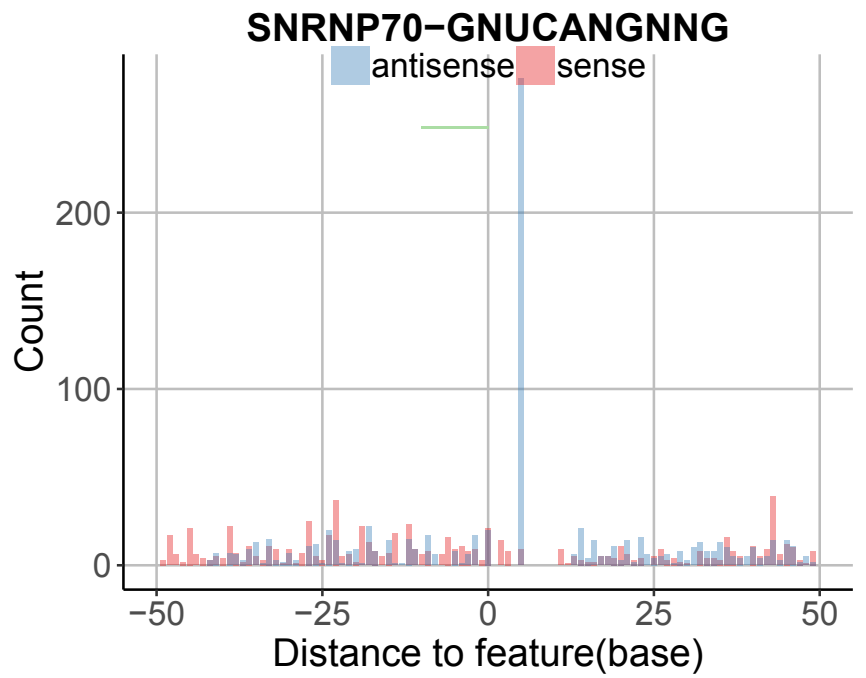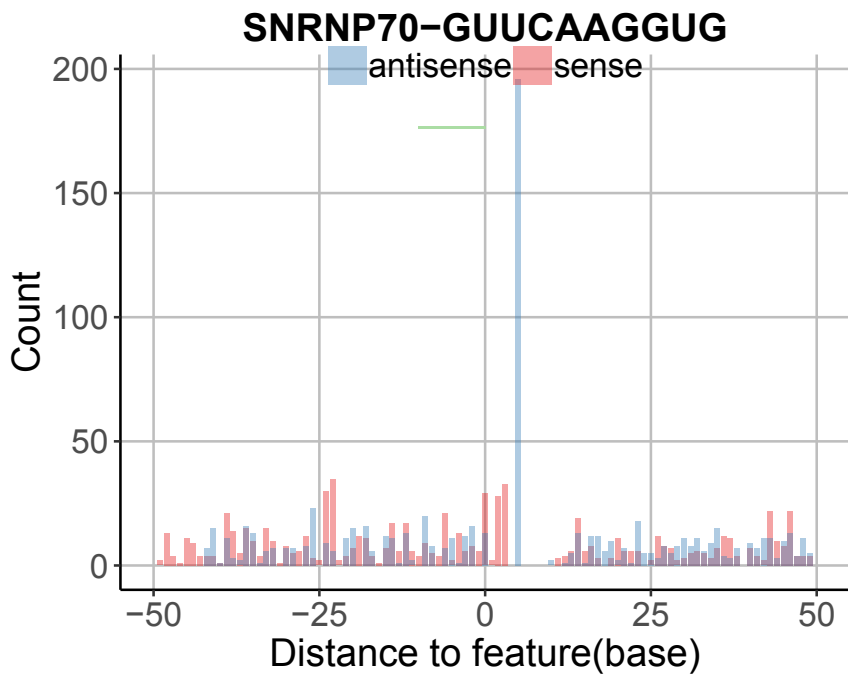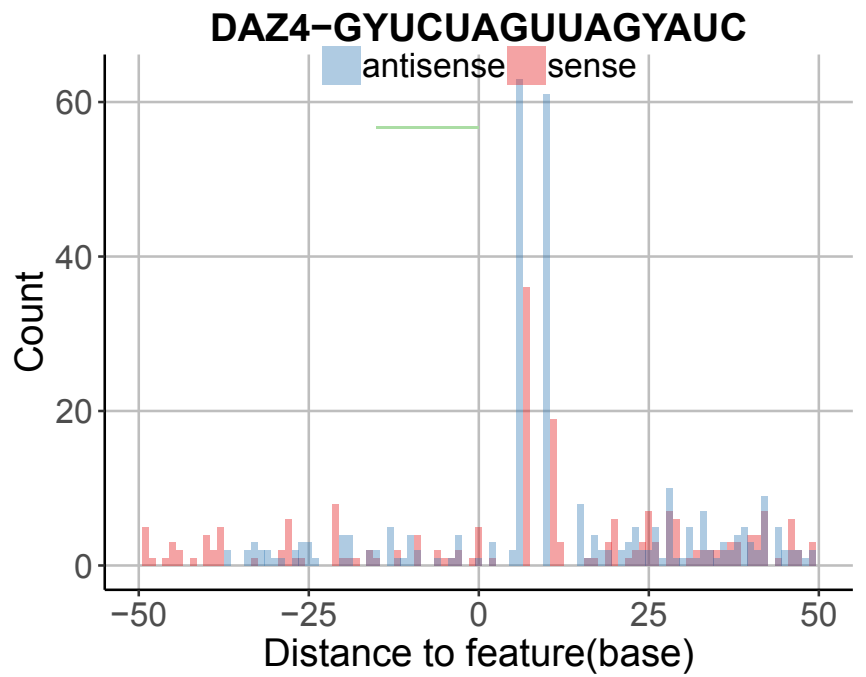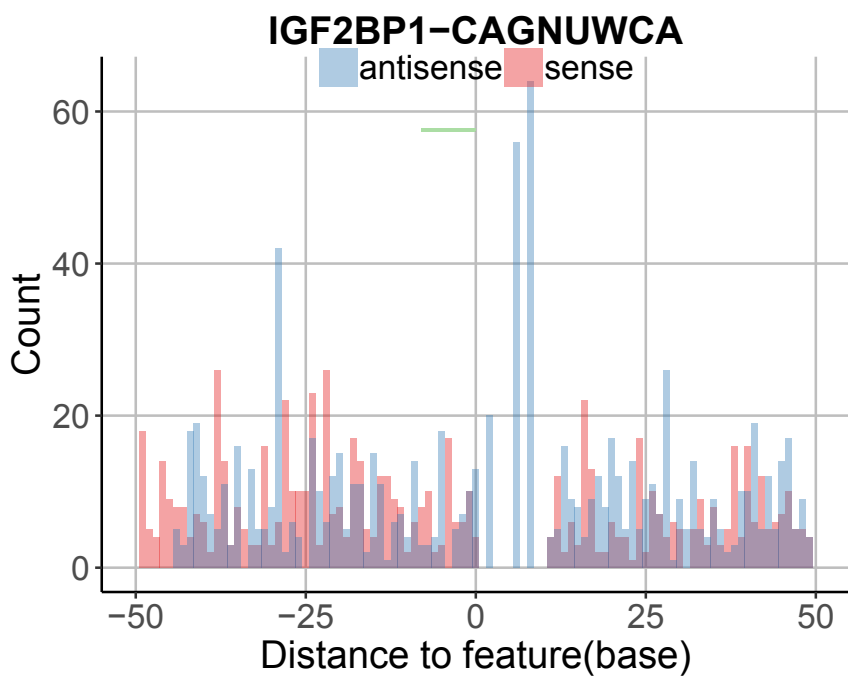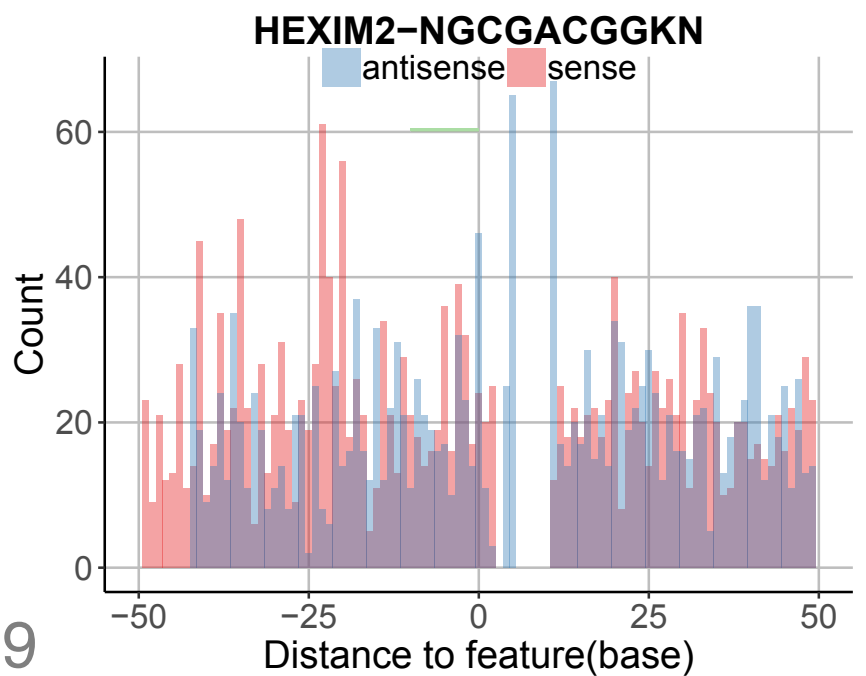

9

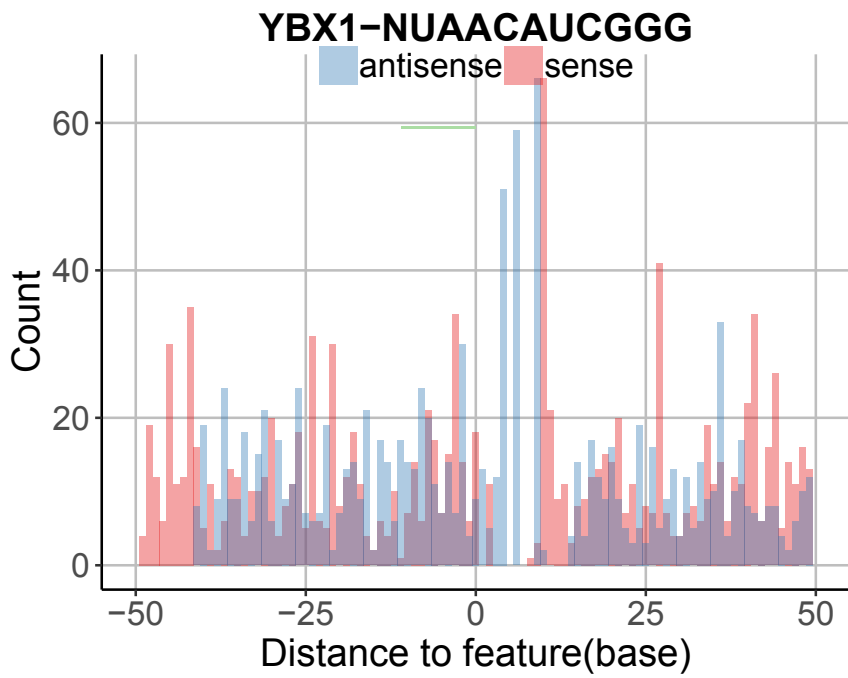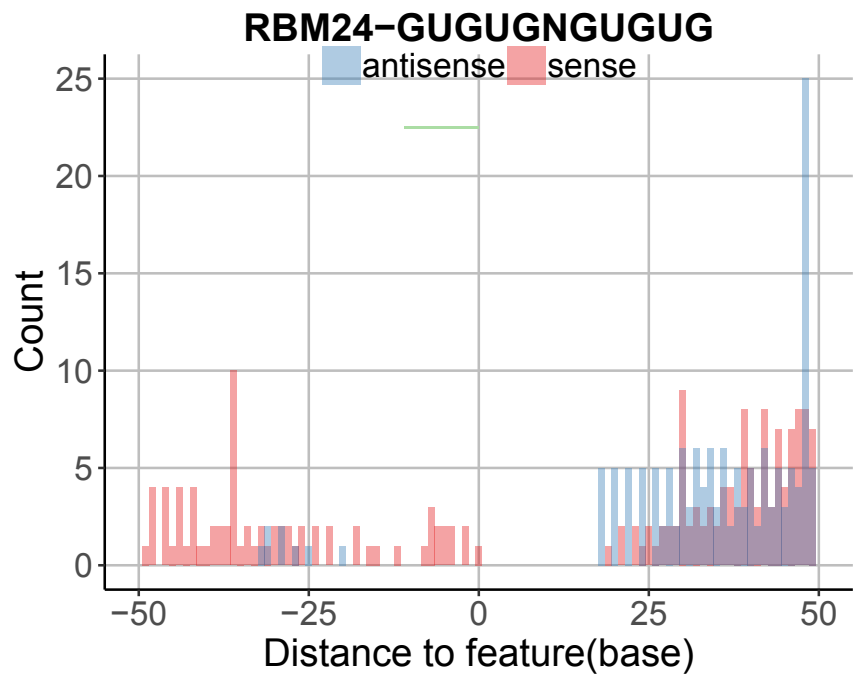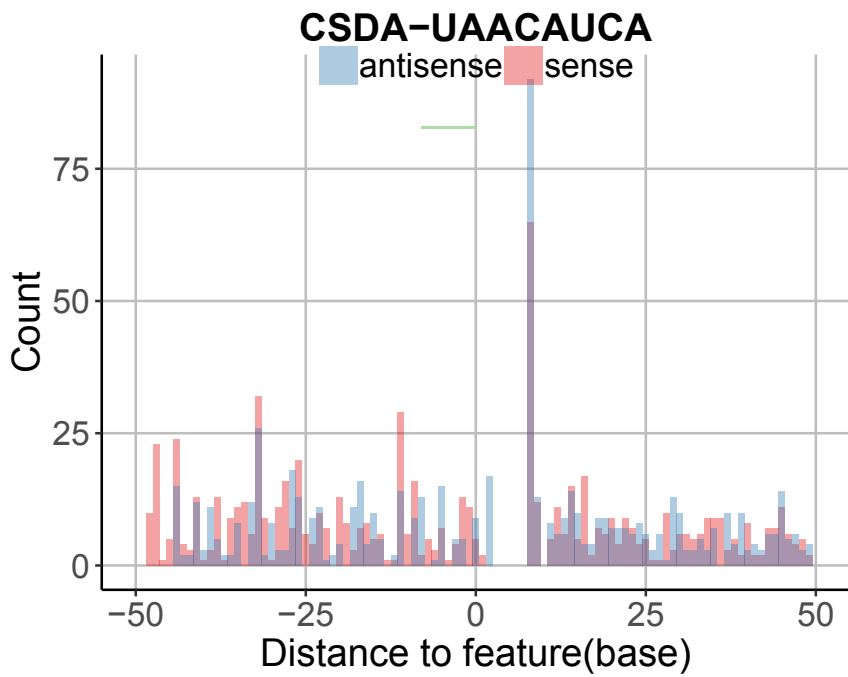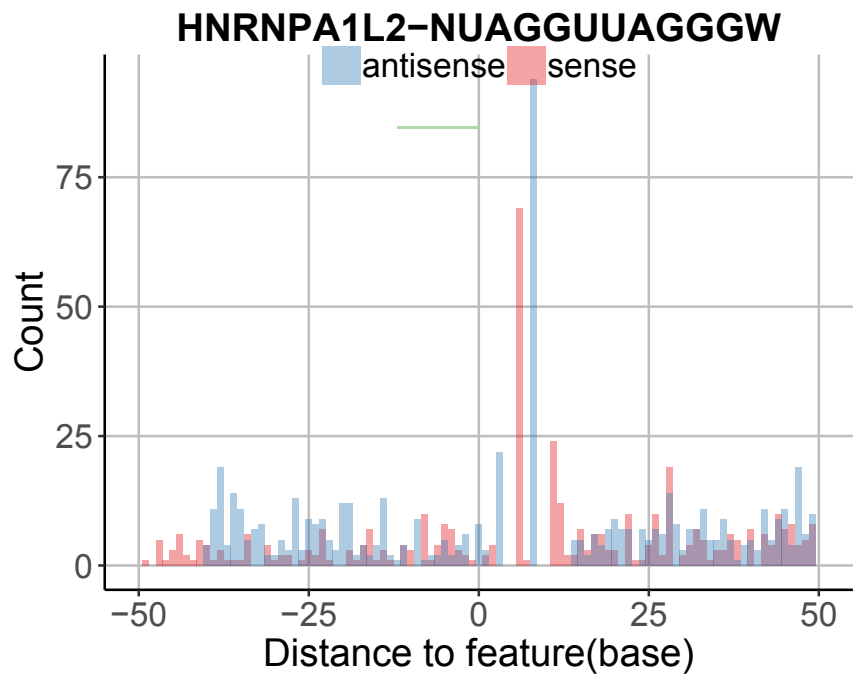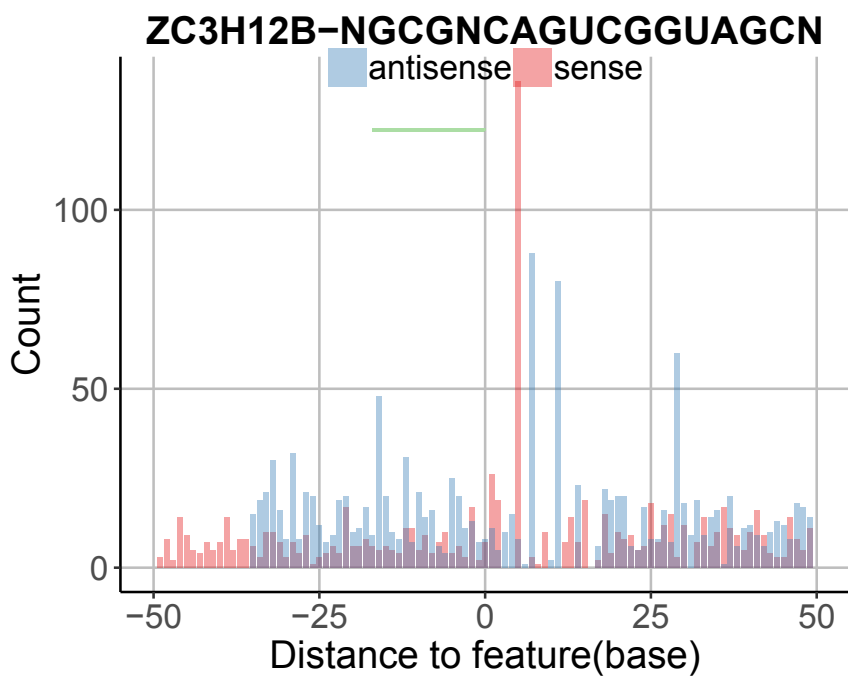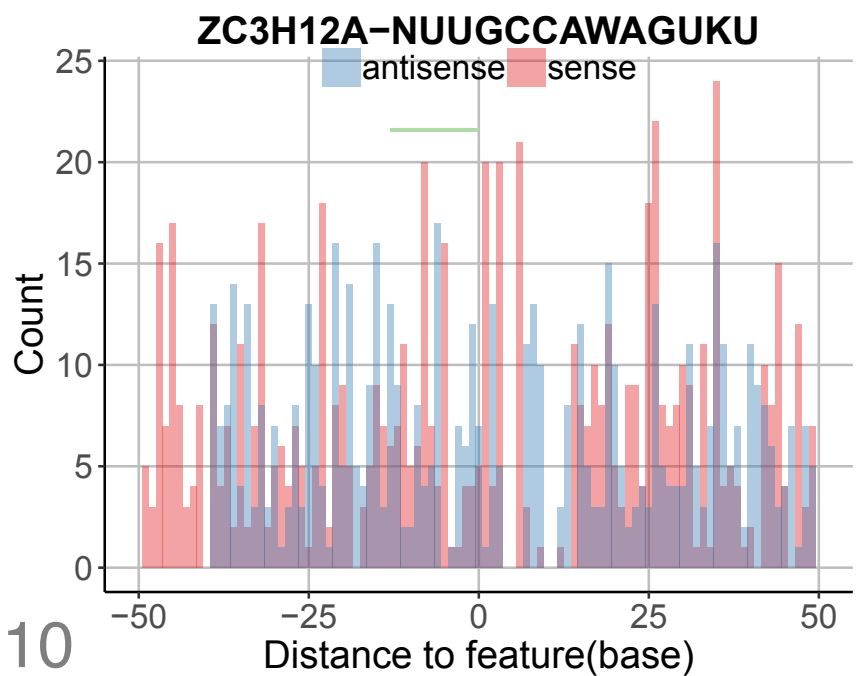

10

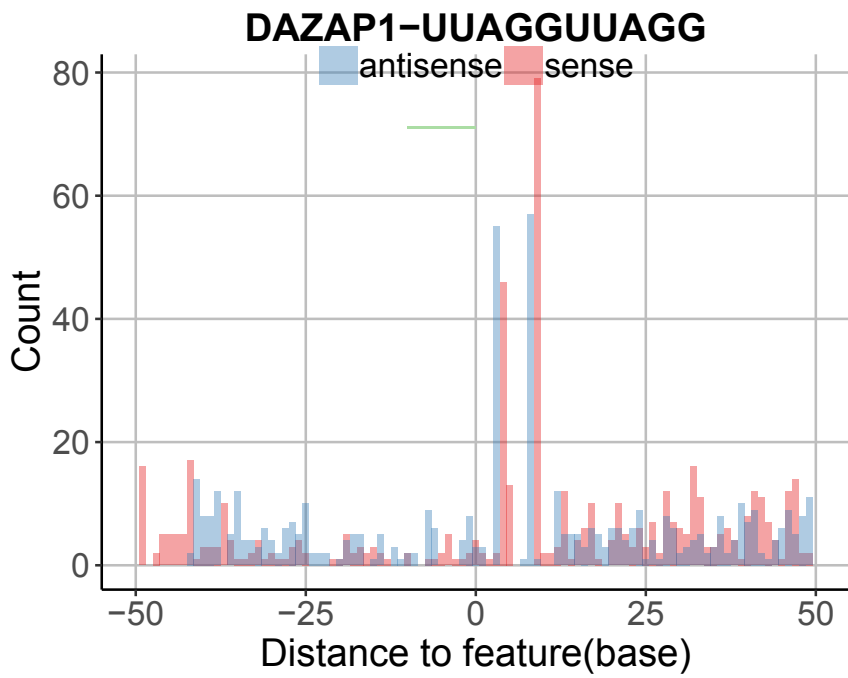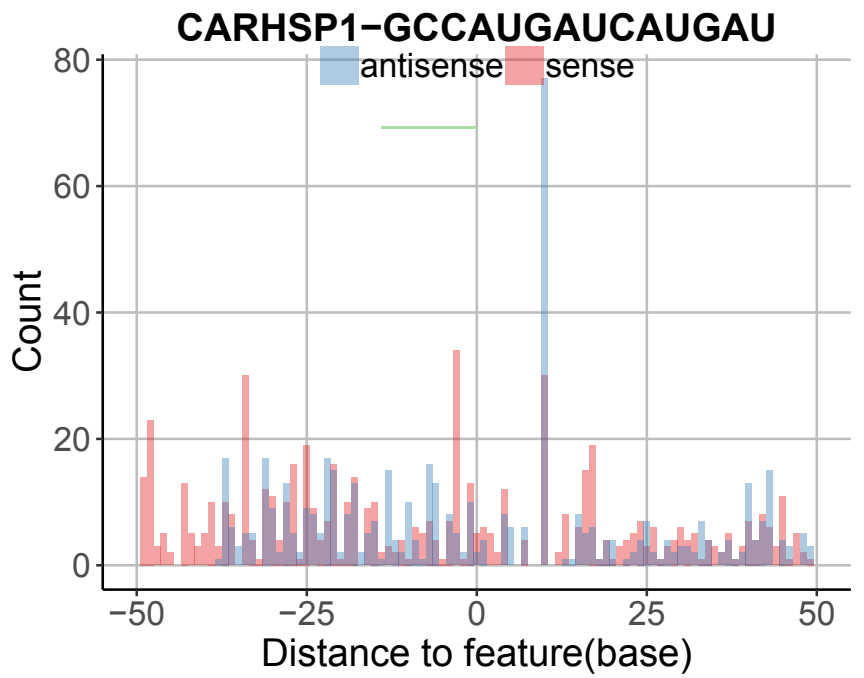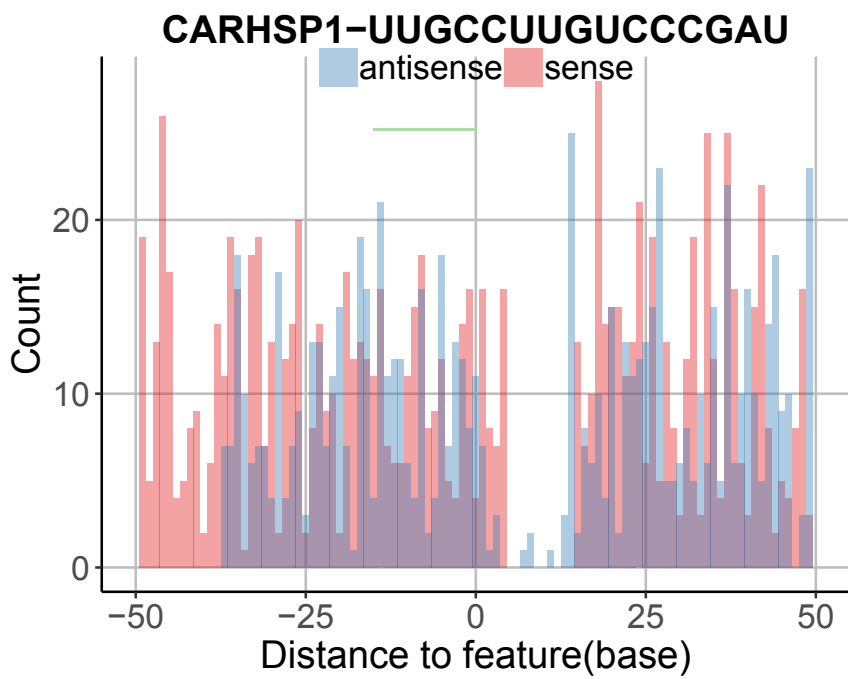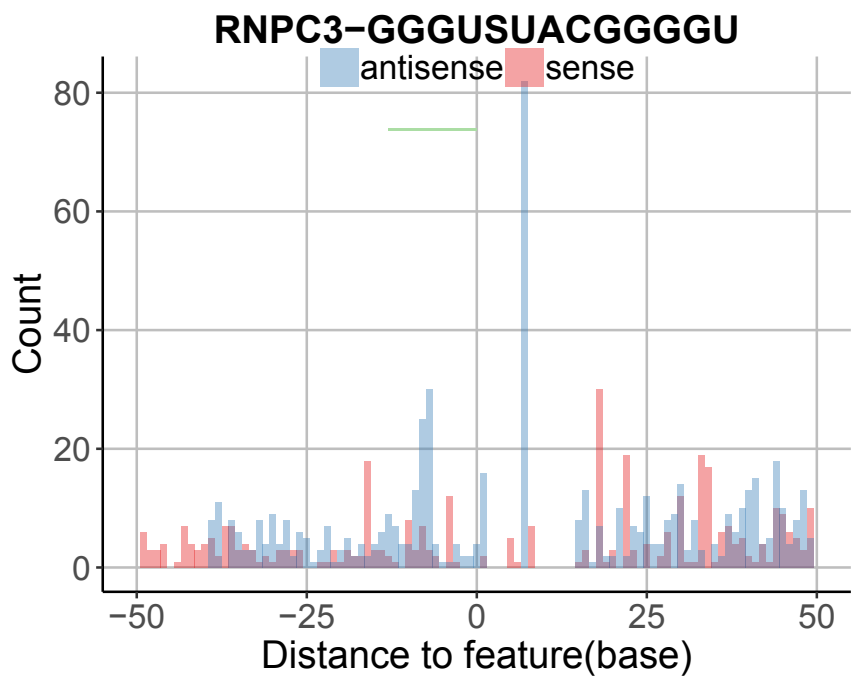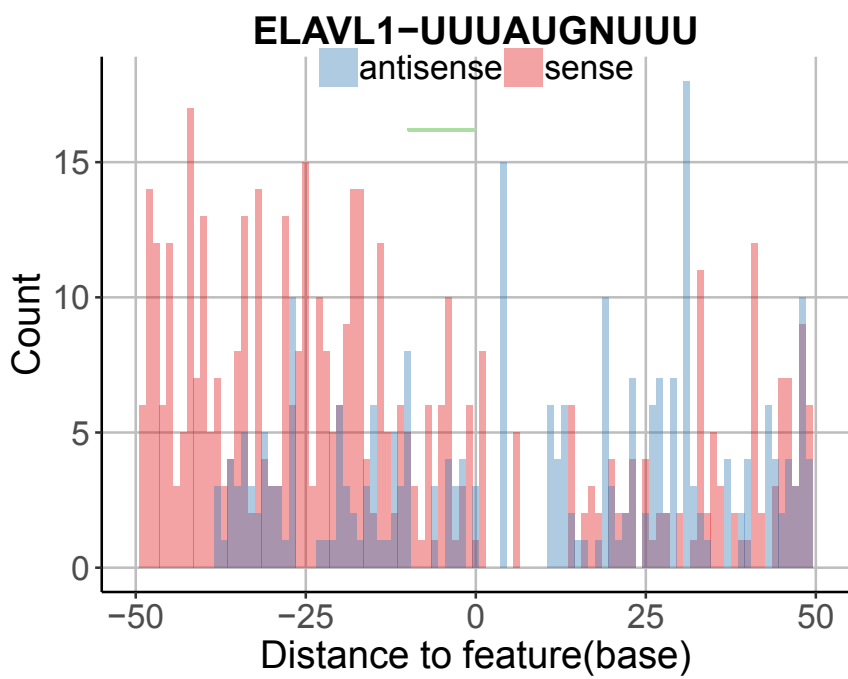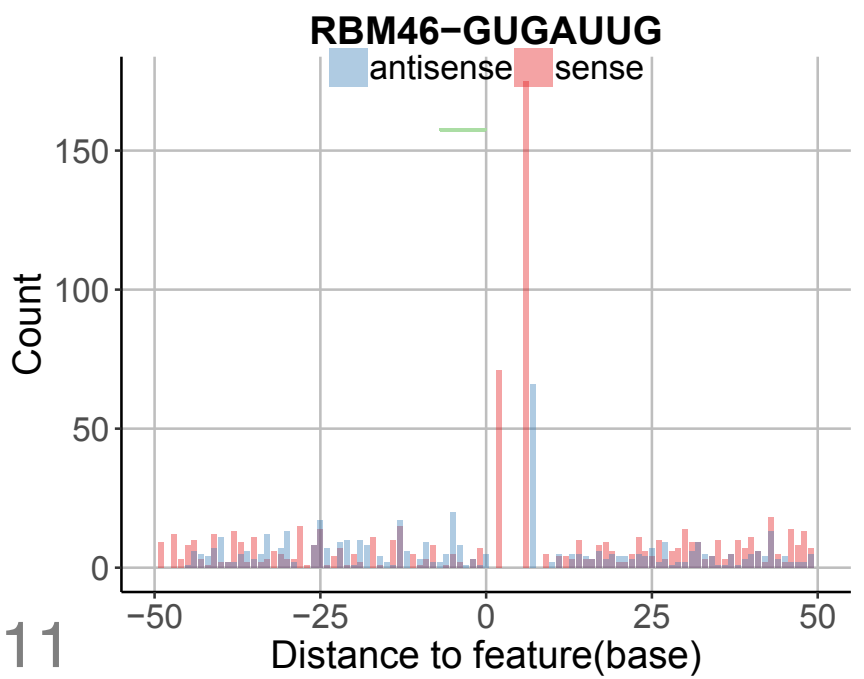

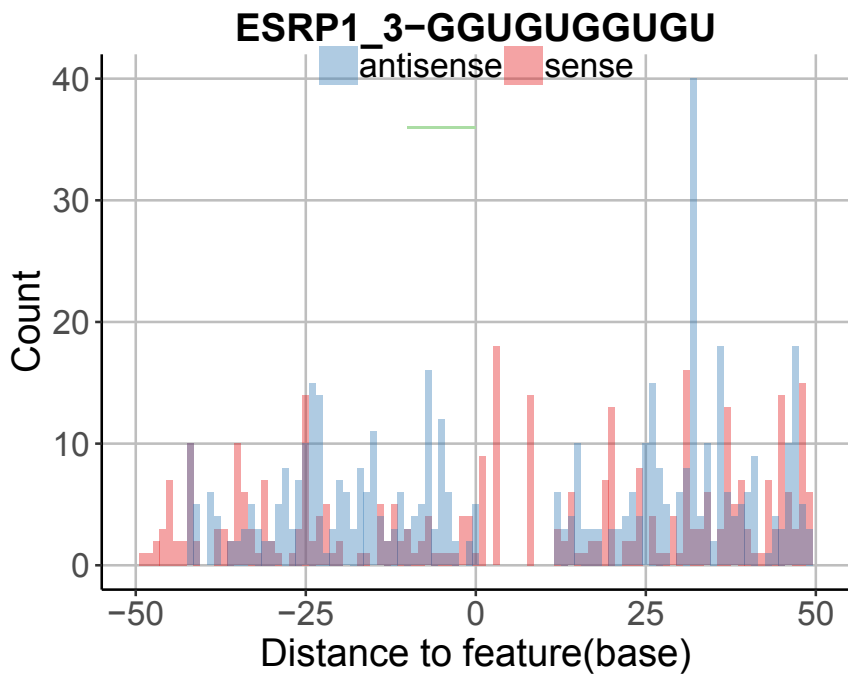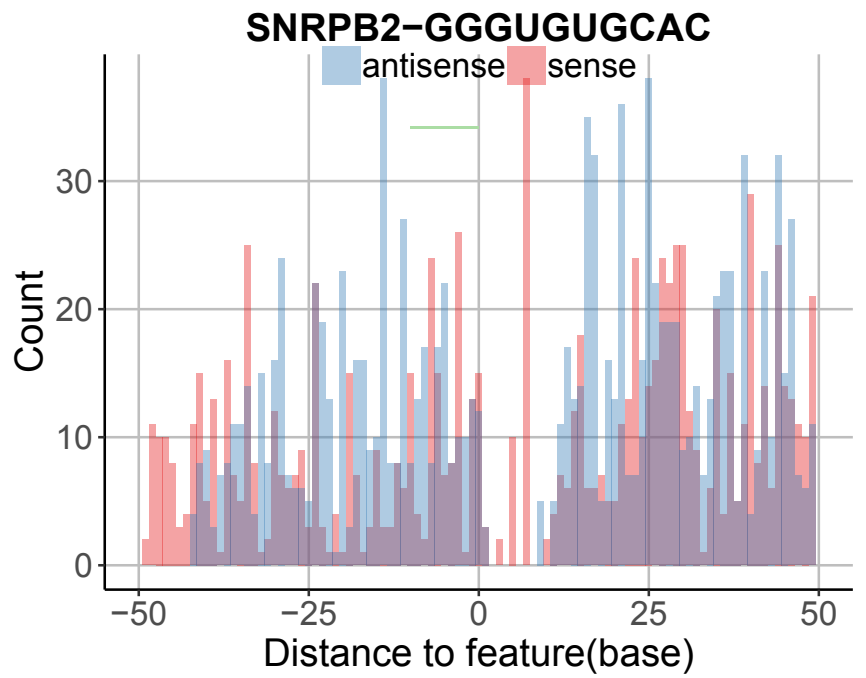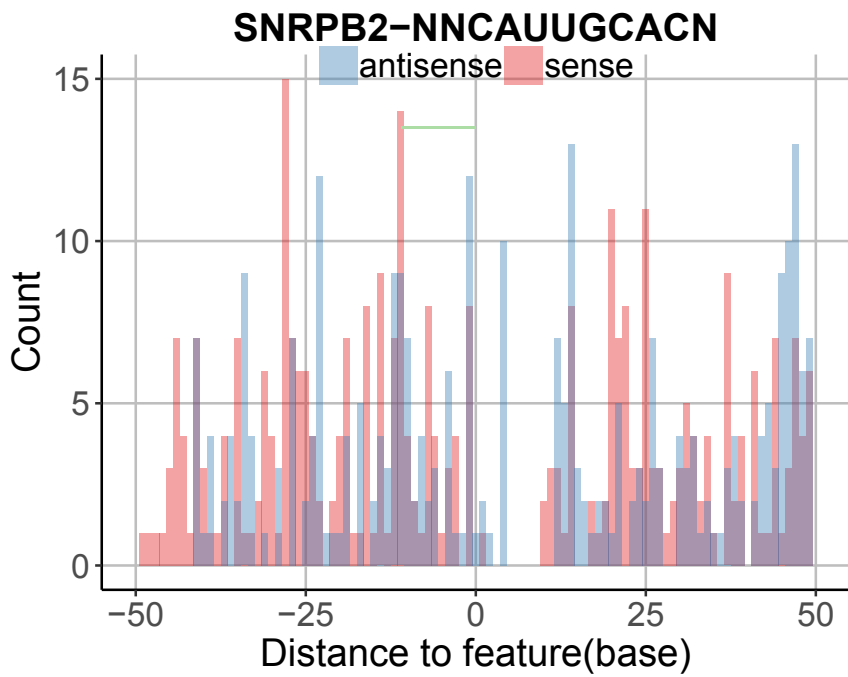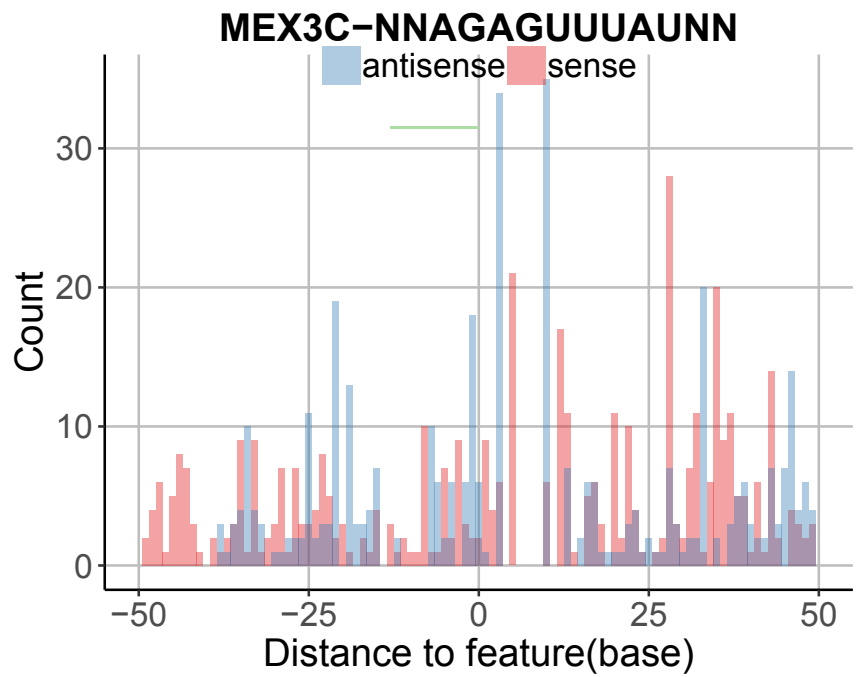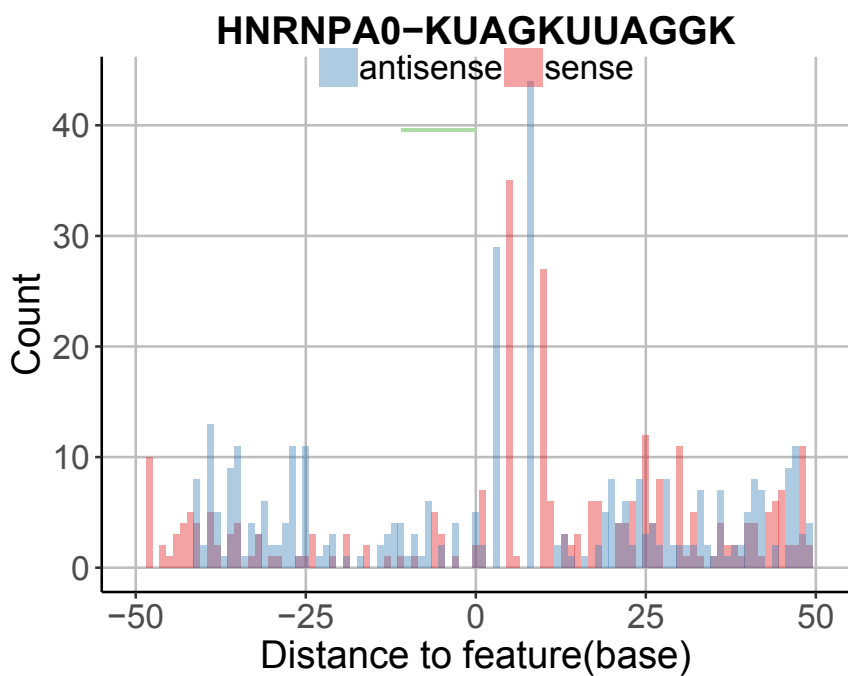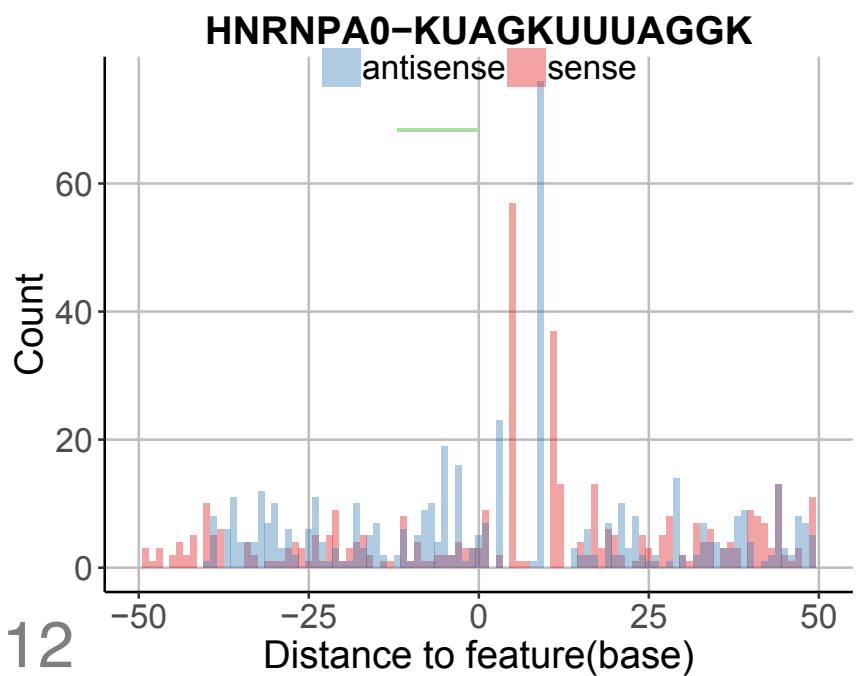

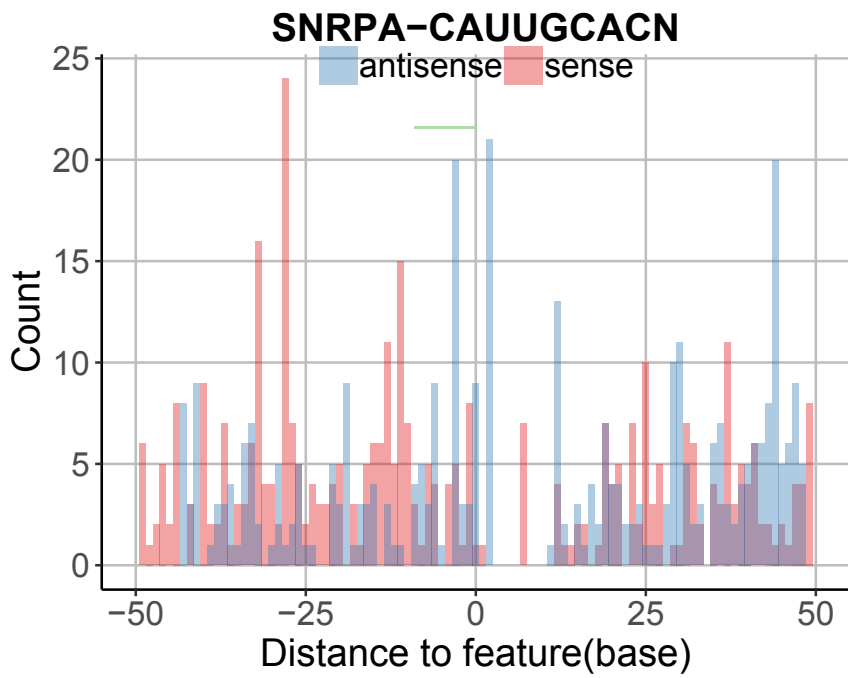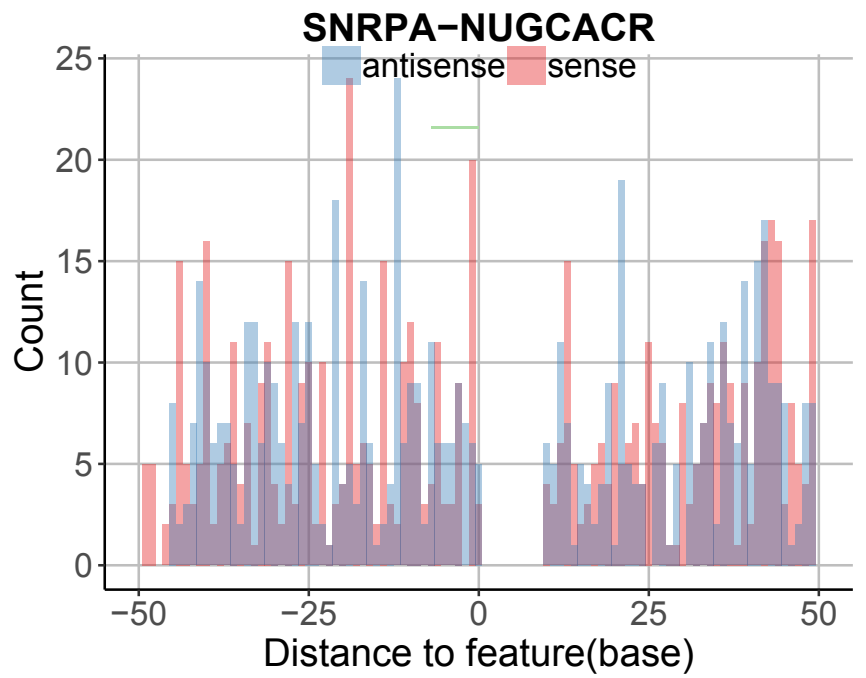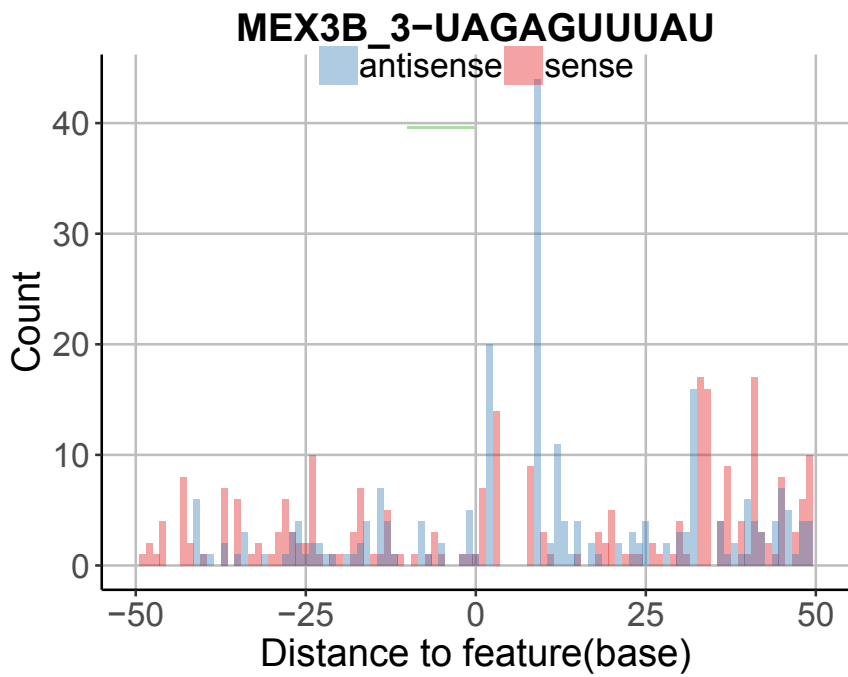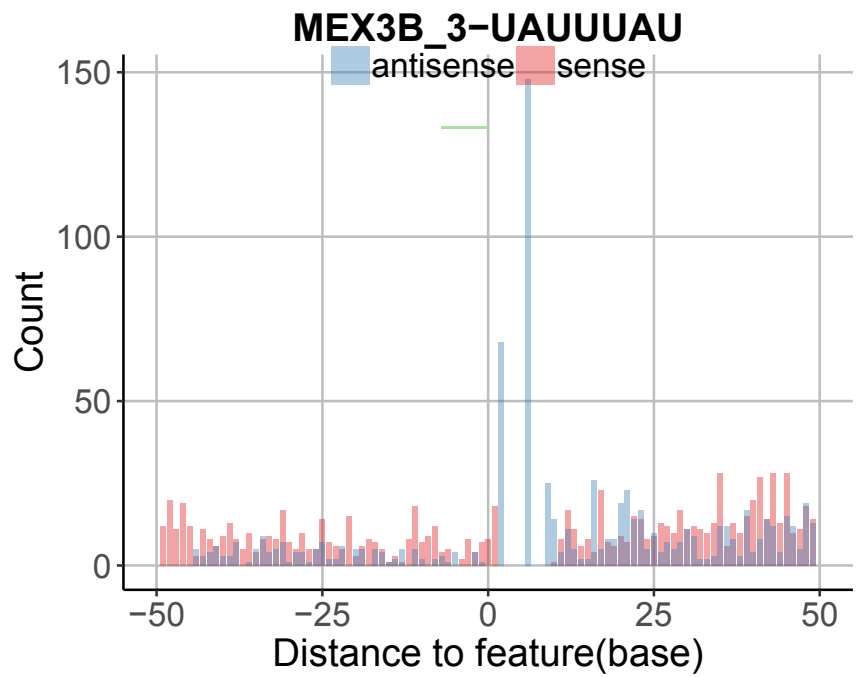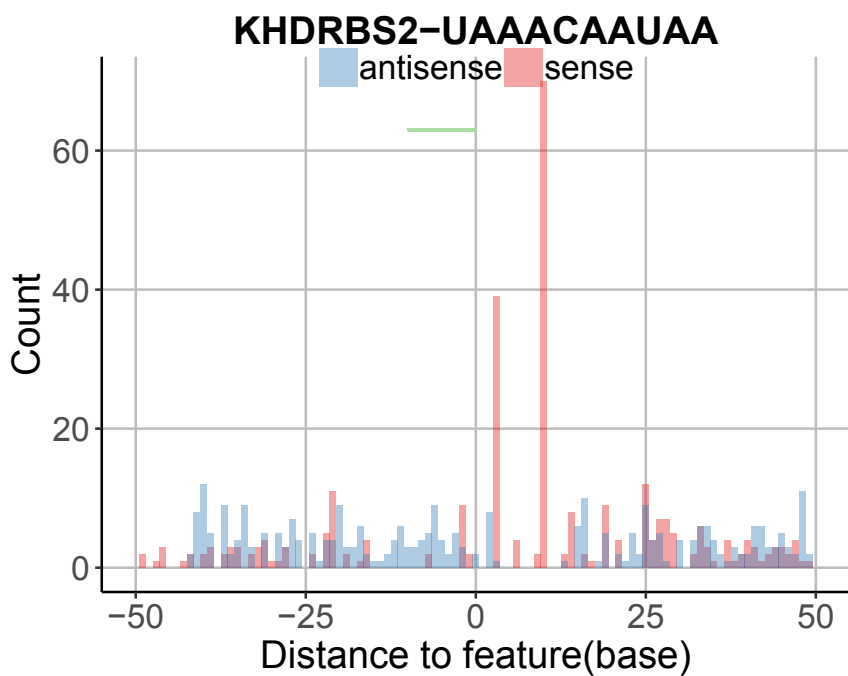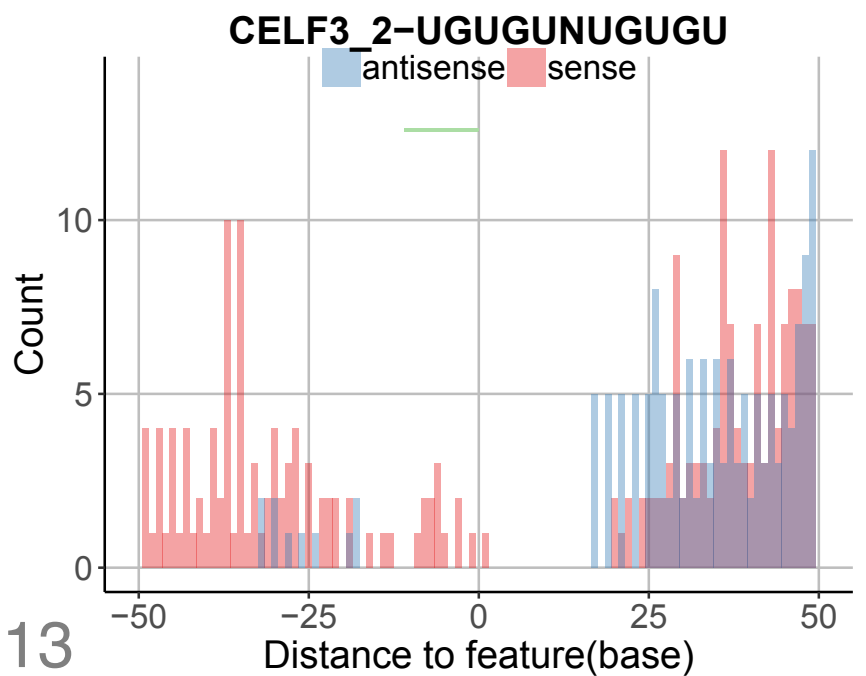

13

**RNPC3-GGGDDGGGDKUACKKGGK**

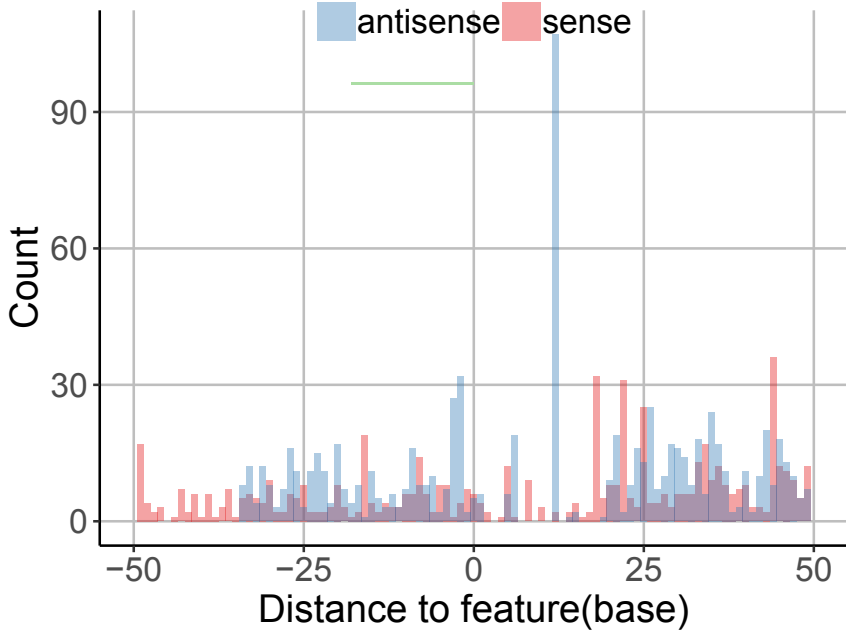

**RBM14-UGCGUCG**

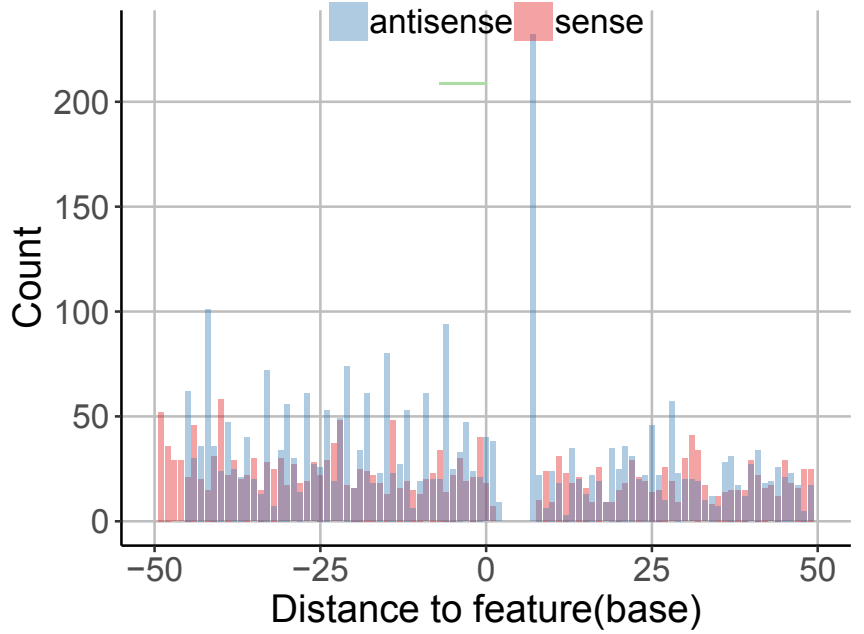

**CELF4-UGUGUUGUGU**

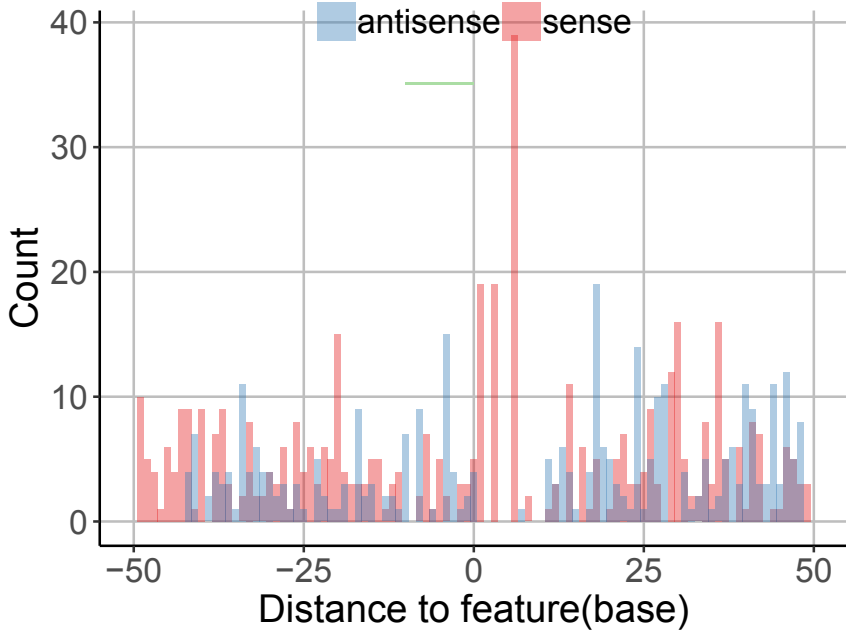

**ZRANB2-NNGGUAAGGUNN**

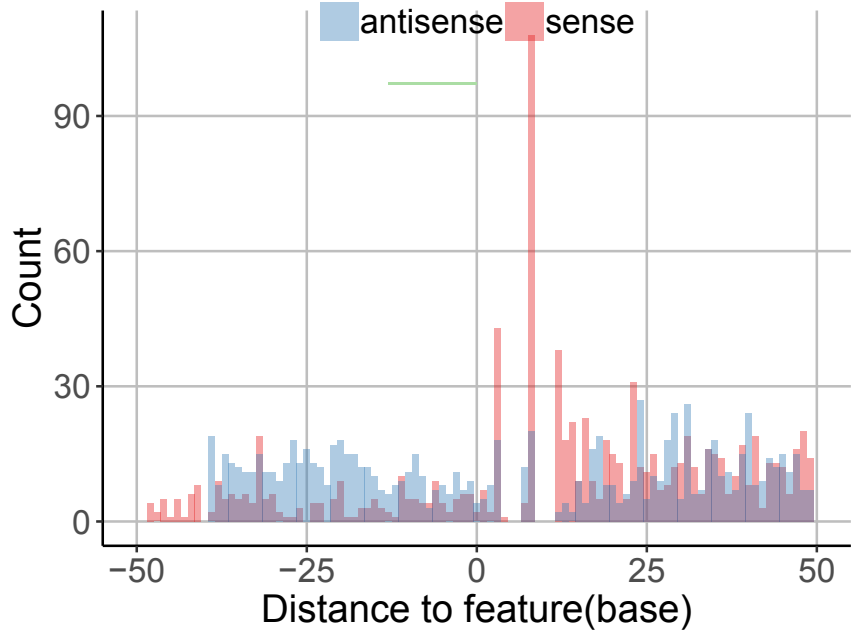

**RBM4-CGGGGURUGN**

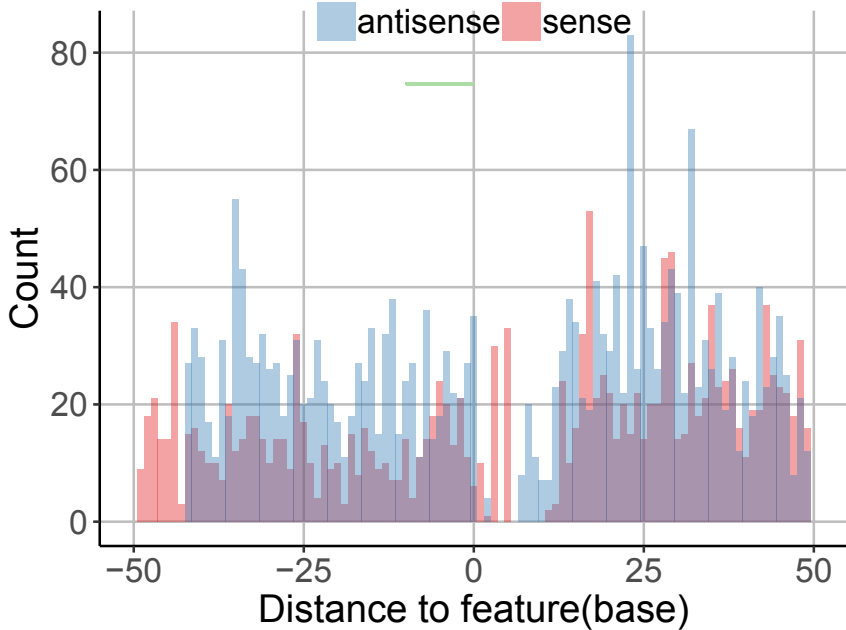

**RBPM5-NAGGCACR**

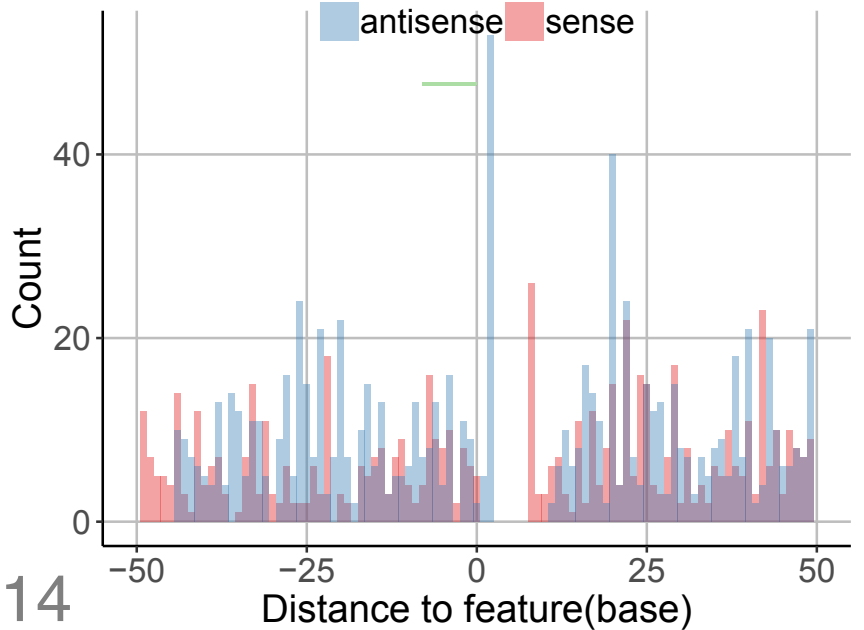

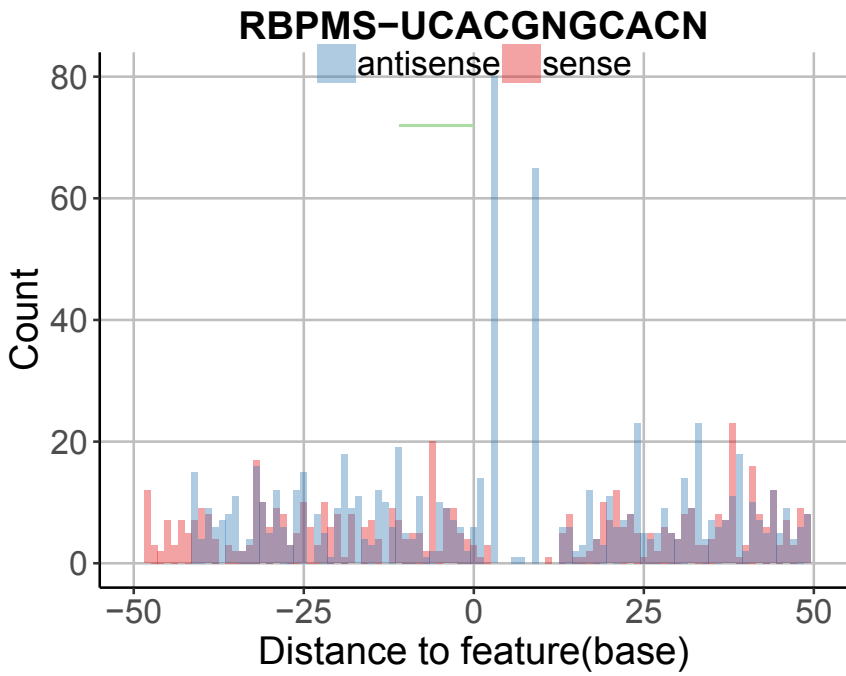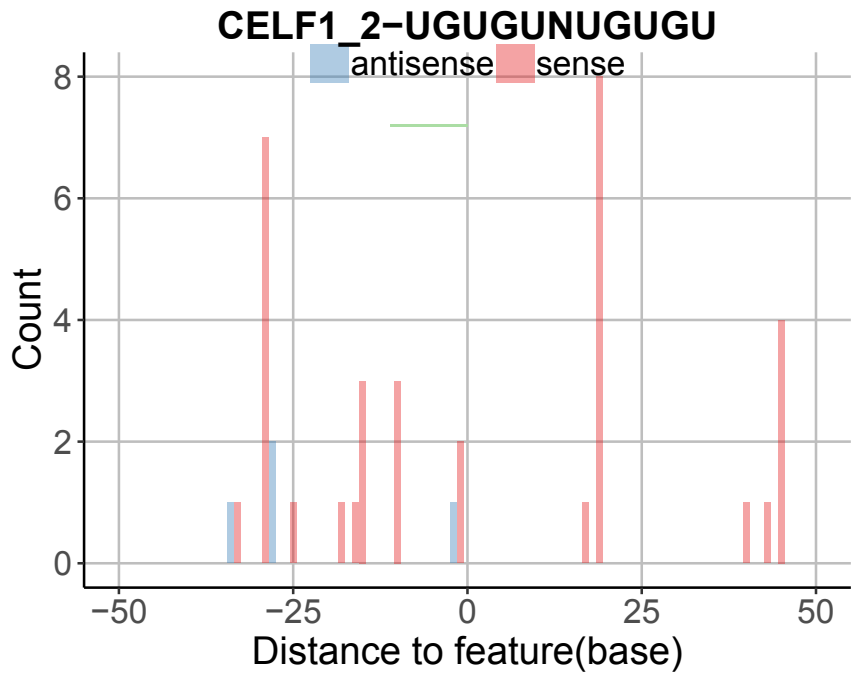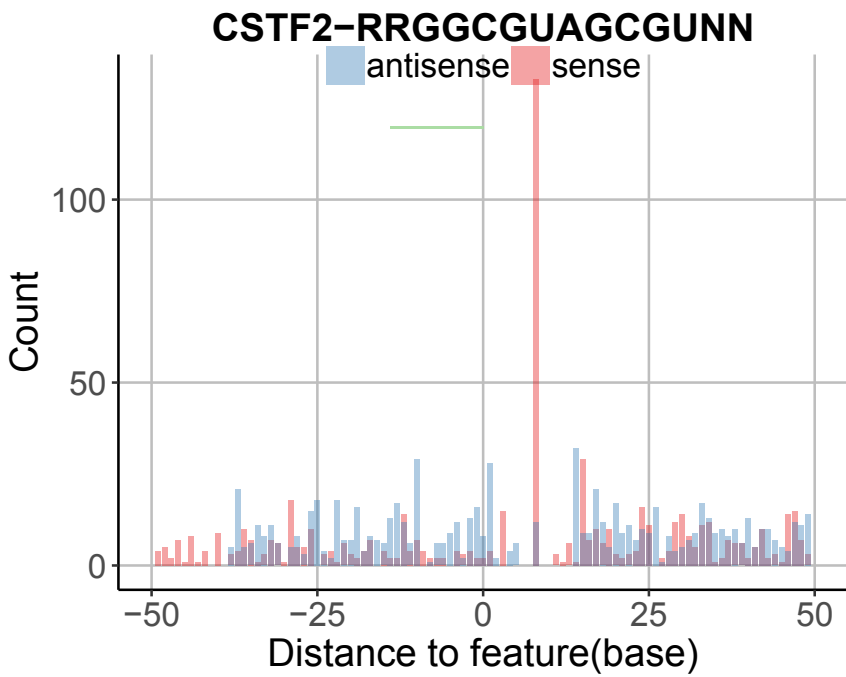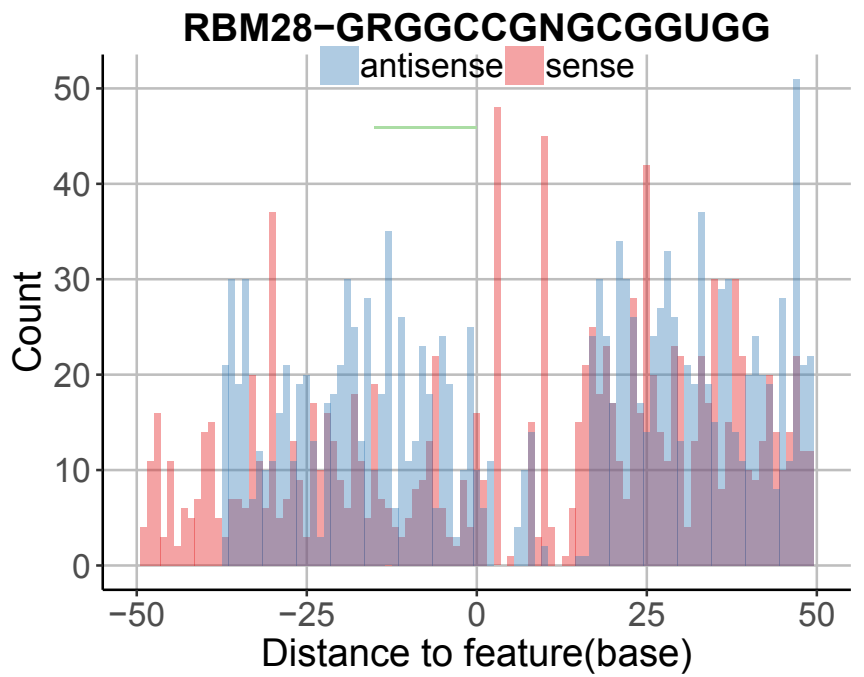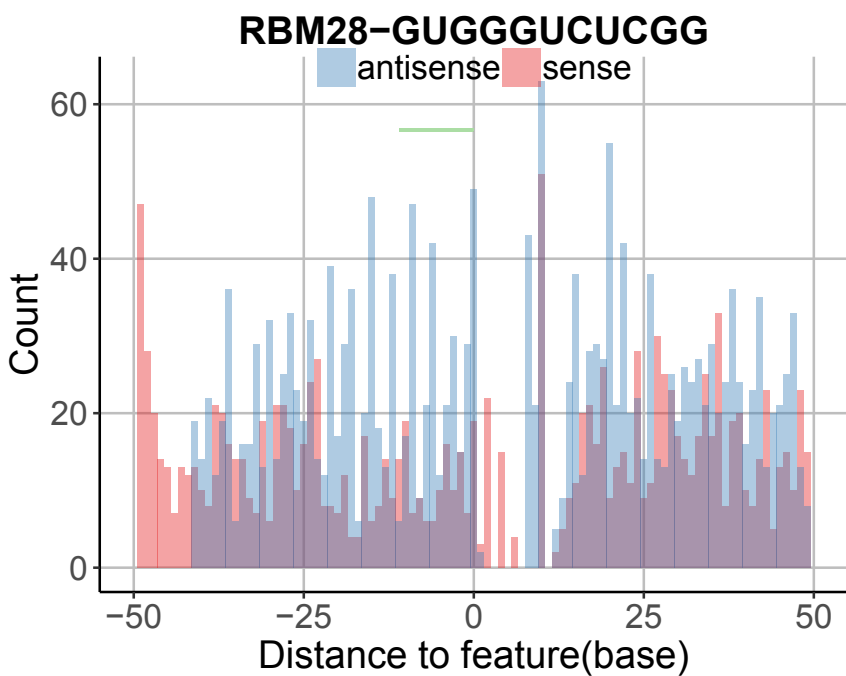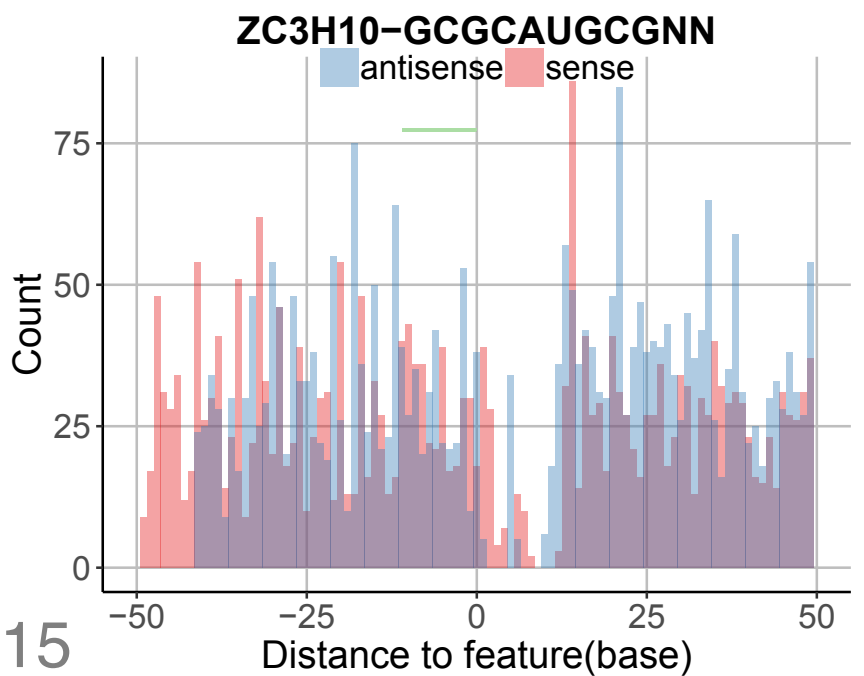

15



**ZC3H10-NGCGCAGCGUN**

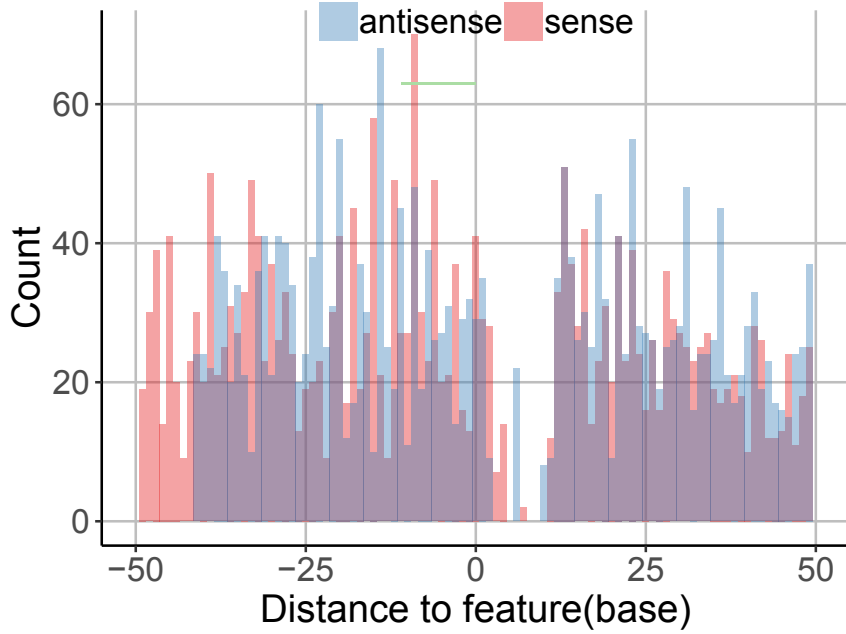

**RBFOX1\_2-GCAUGNNGCAUG**

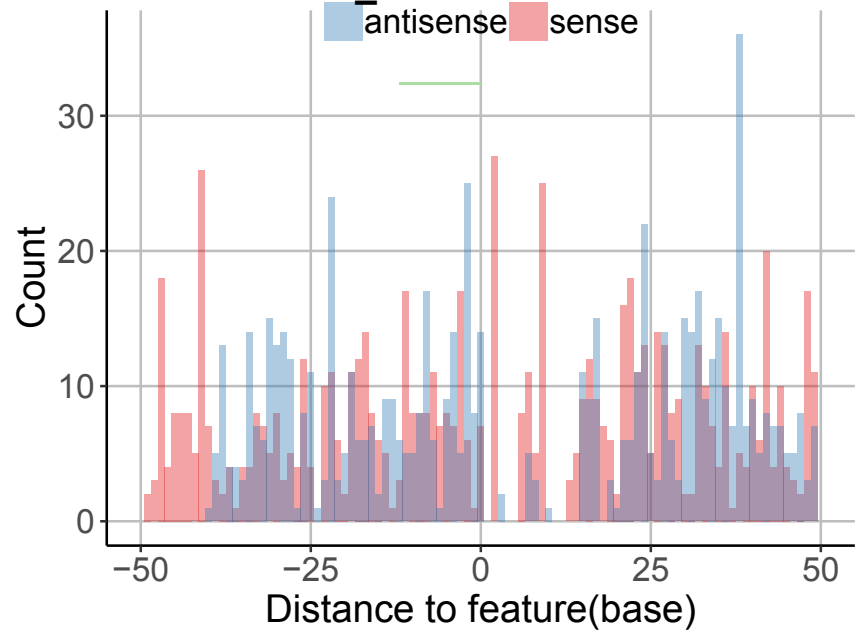

**MSI1-KUAGUWKUAGK**

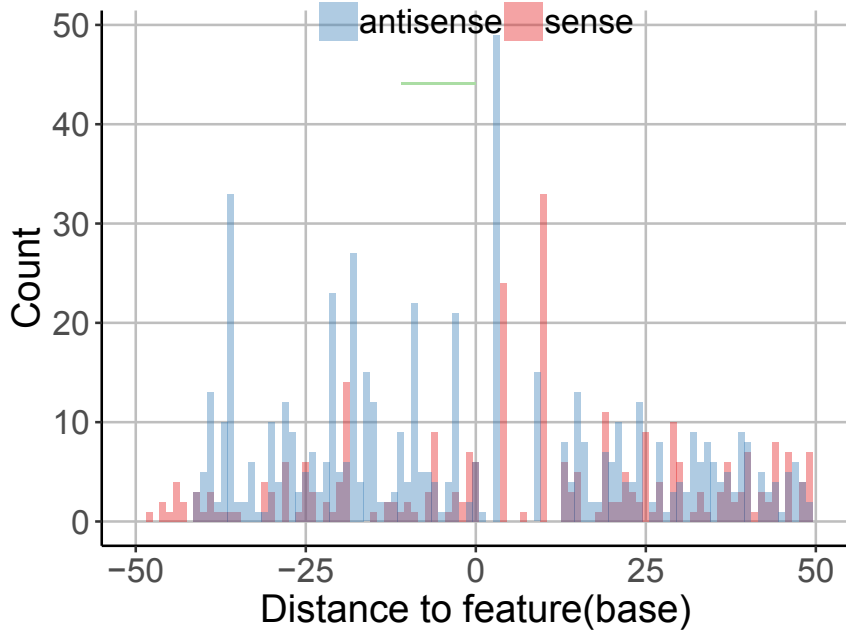

**HEXIM1-GKDKCGACGGK**

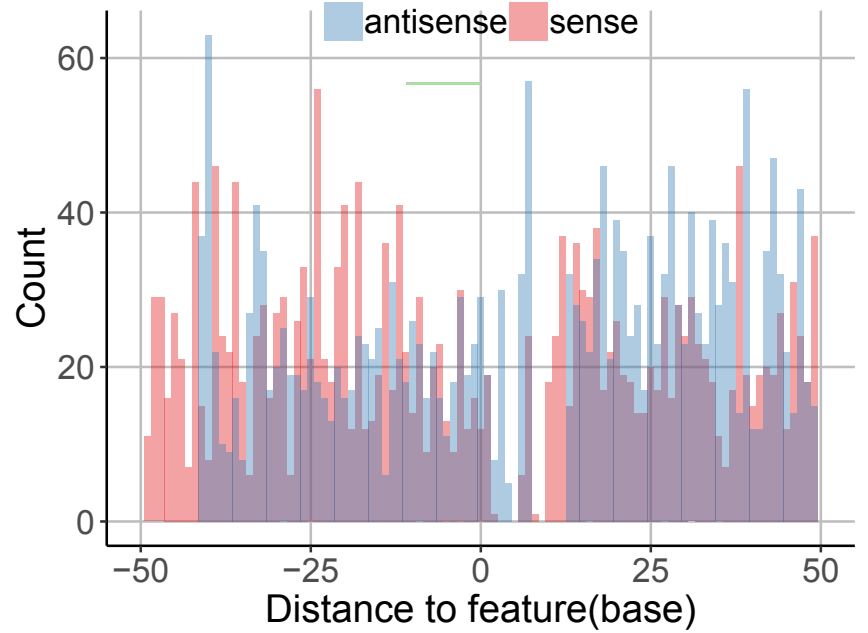

**SART3-NGUUAGCRK**

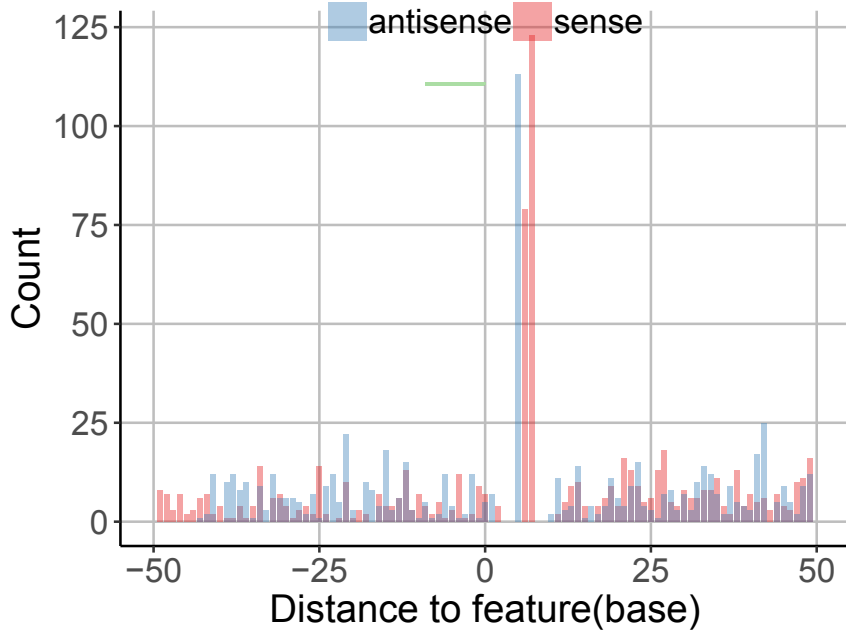

**MSI2-GUAGUGDGUAGK**

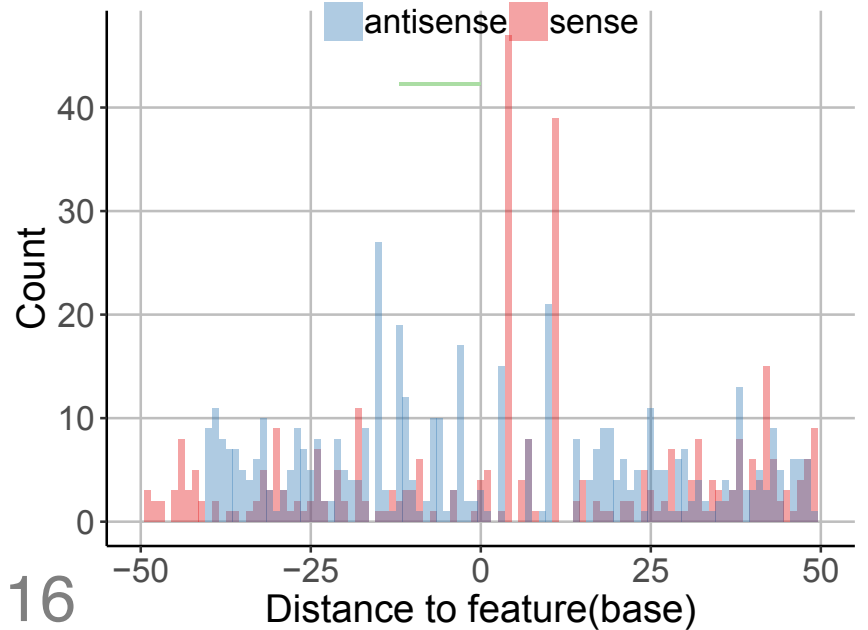

16

**MSI2-GUAGUNNGUAGK**

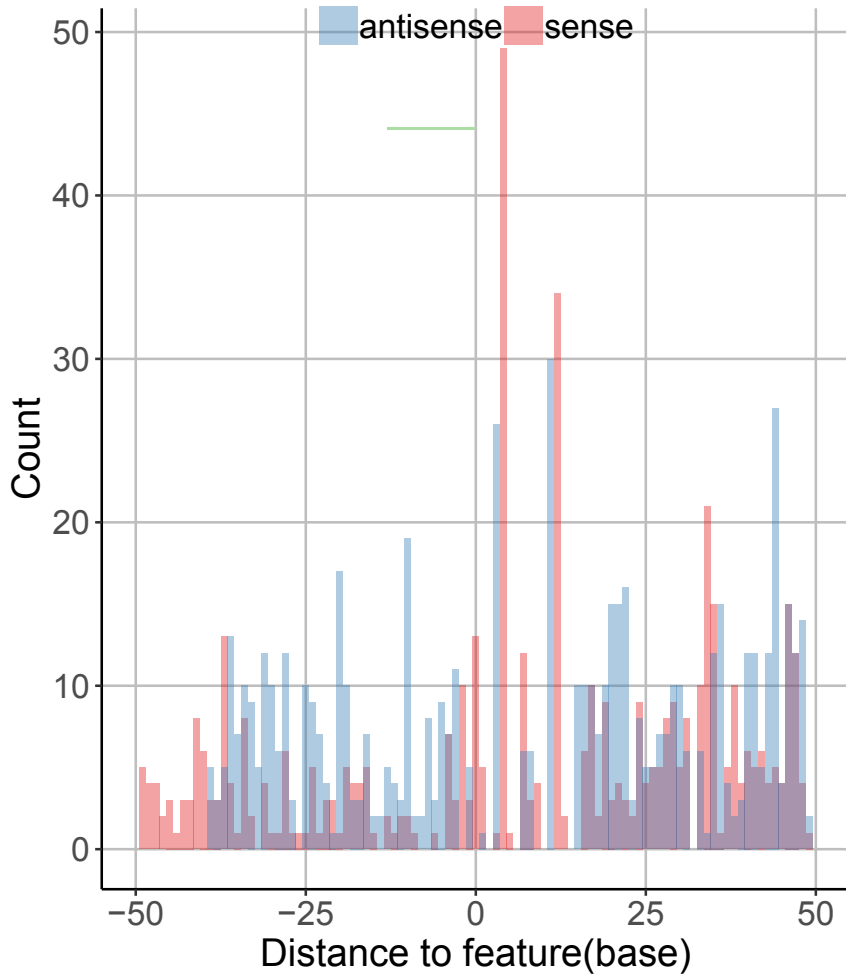

**ZCRB1-GNNUUAAKK**

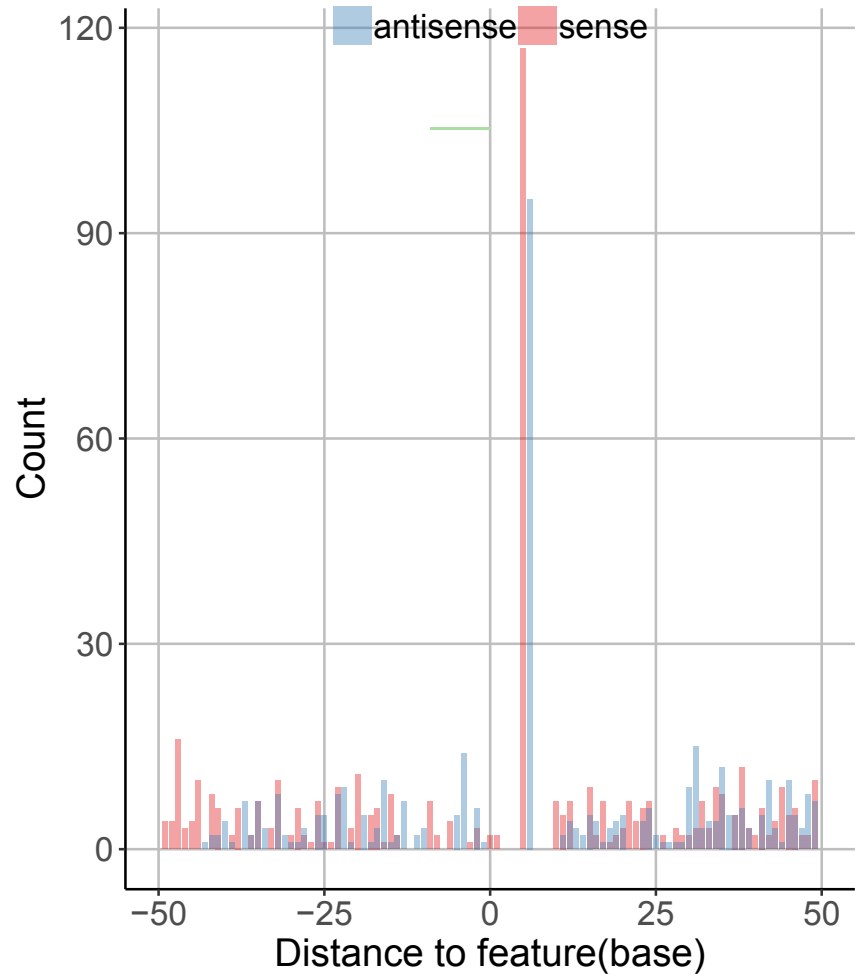

**ZCRB1-GUGGACUUA**

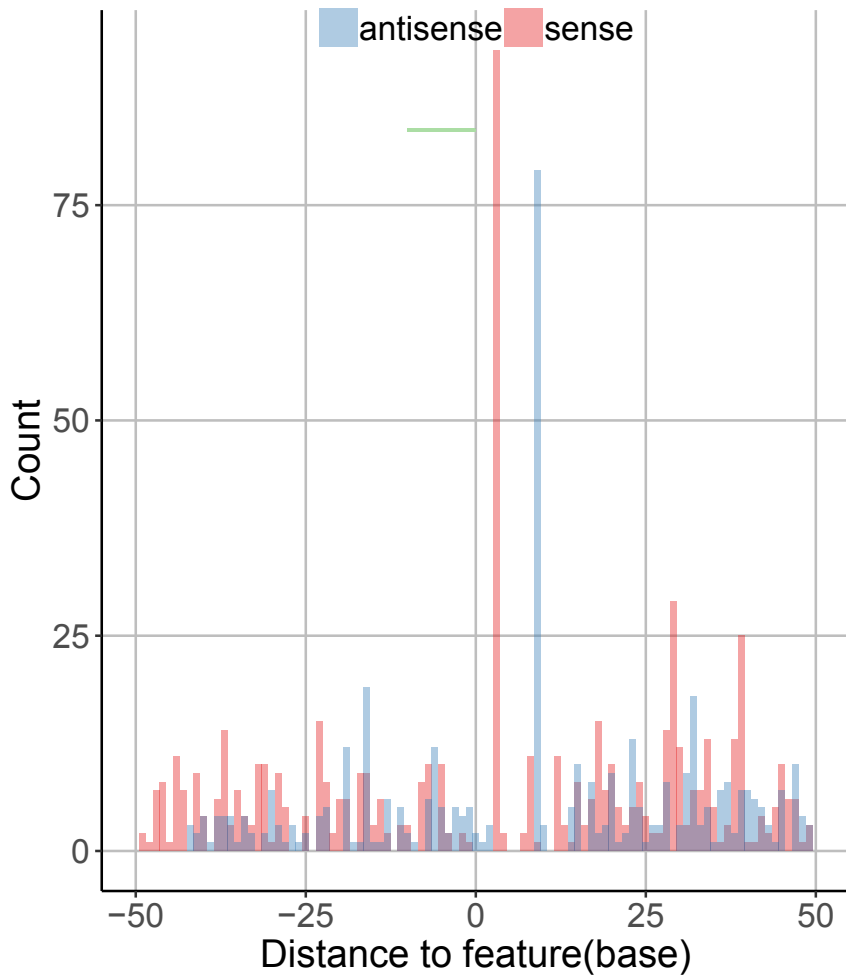

**LARP6-GUGUCNNNNNNNNNGAAGUCN**

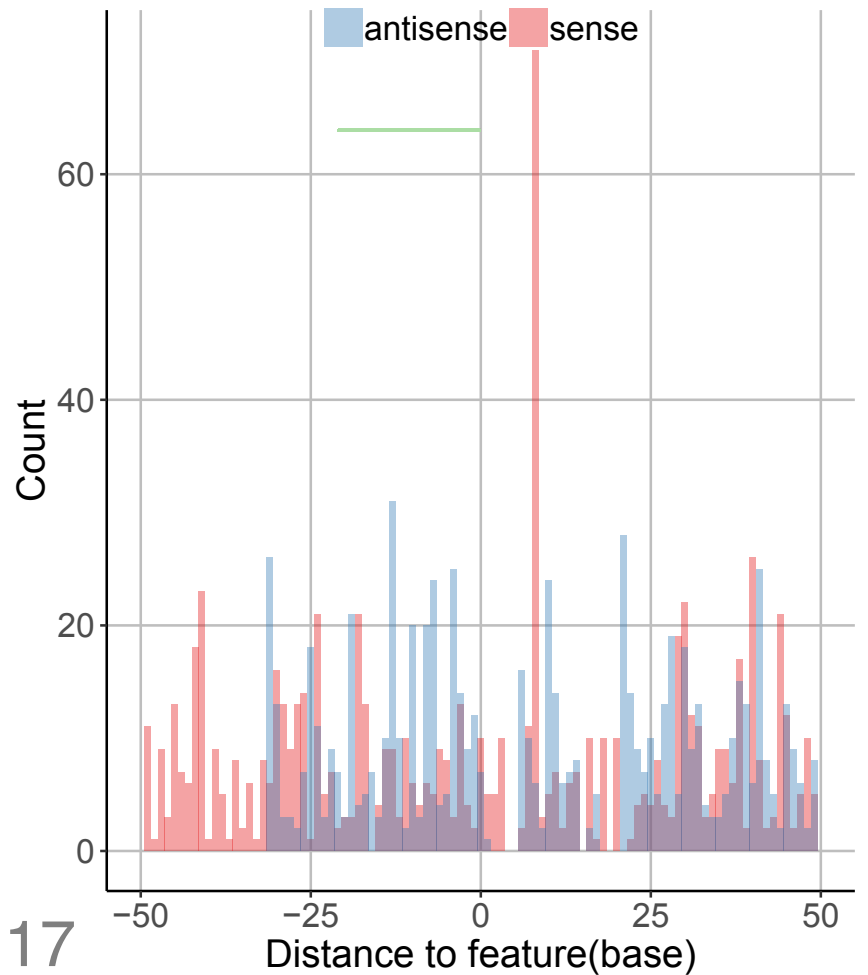

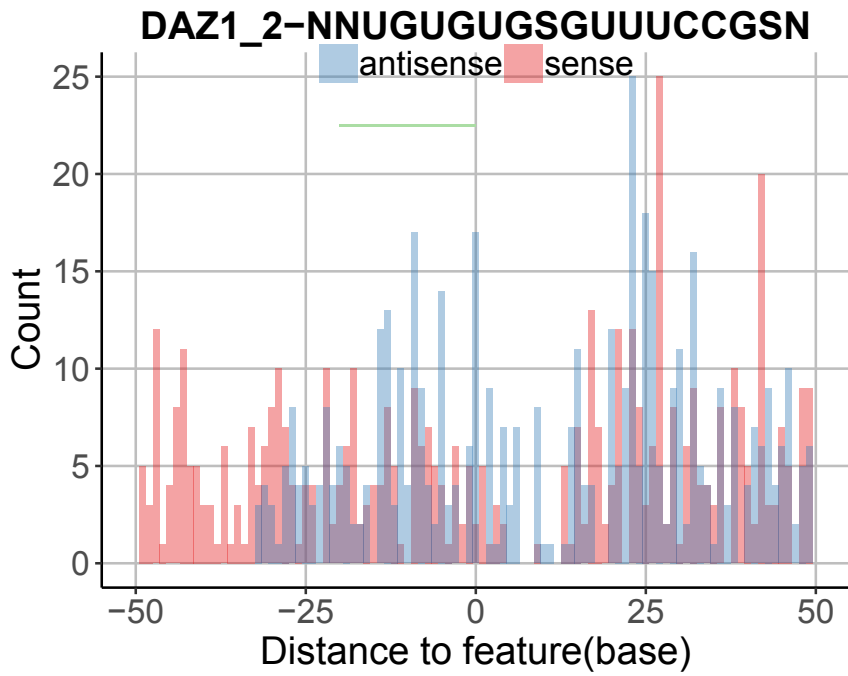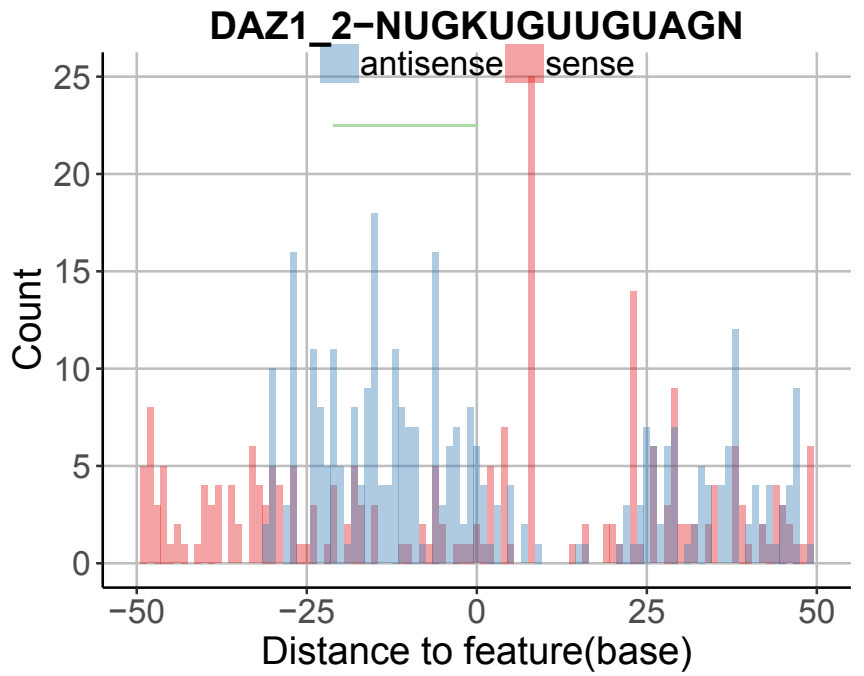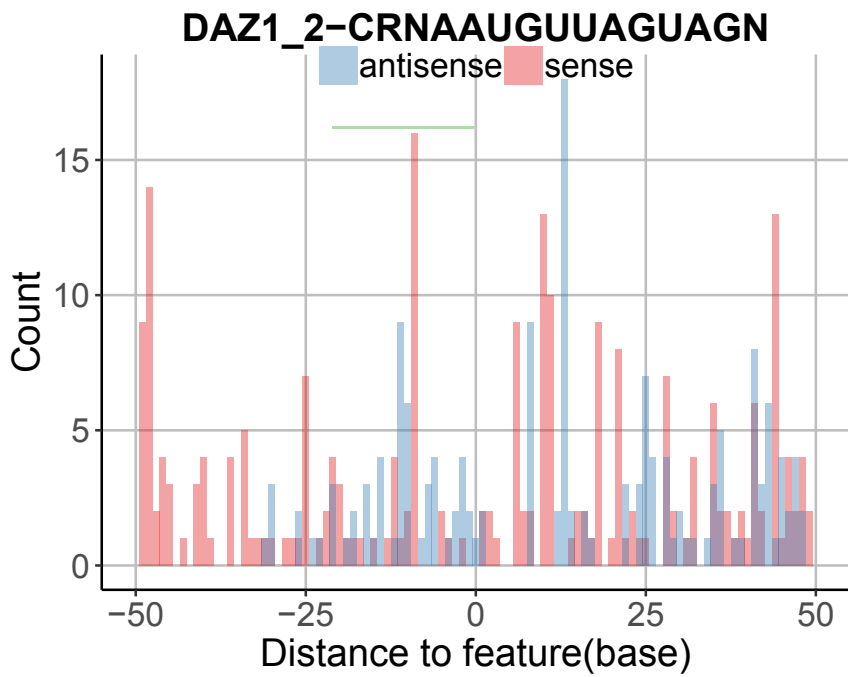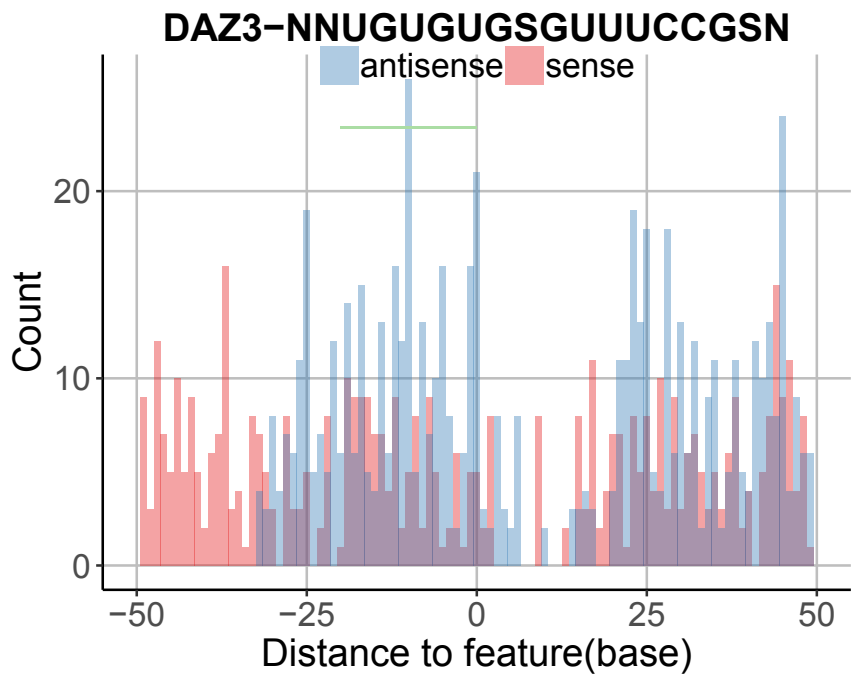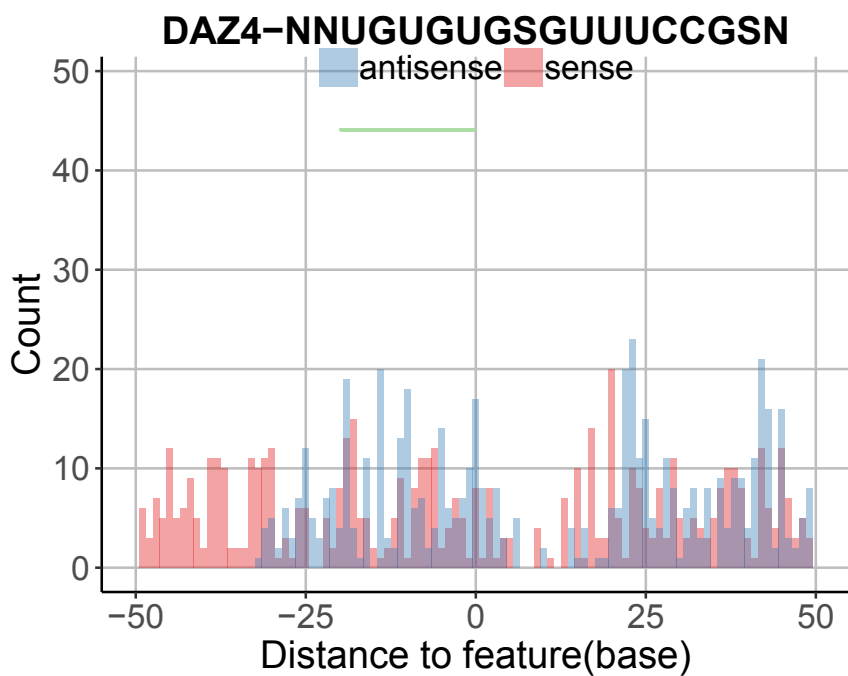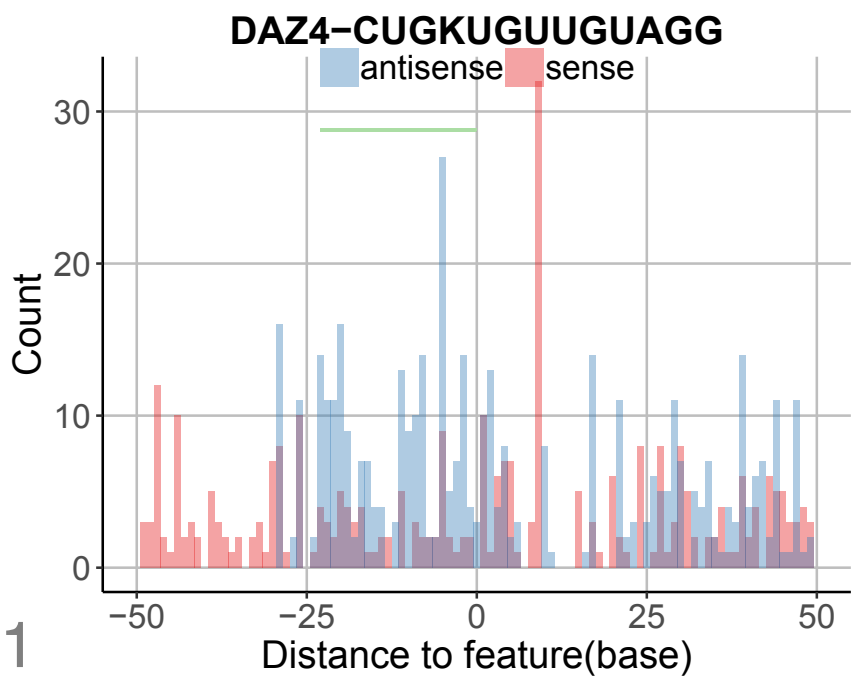

1

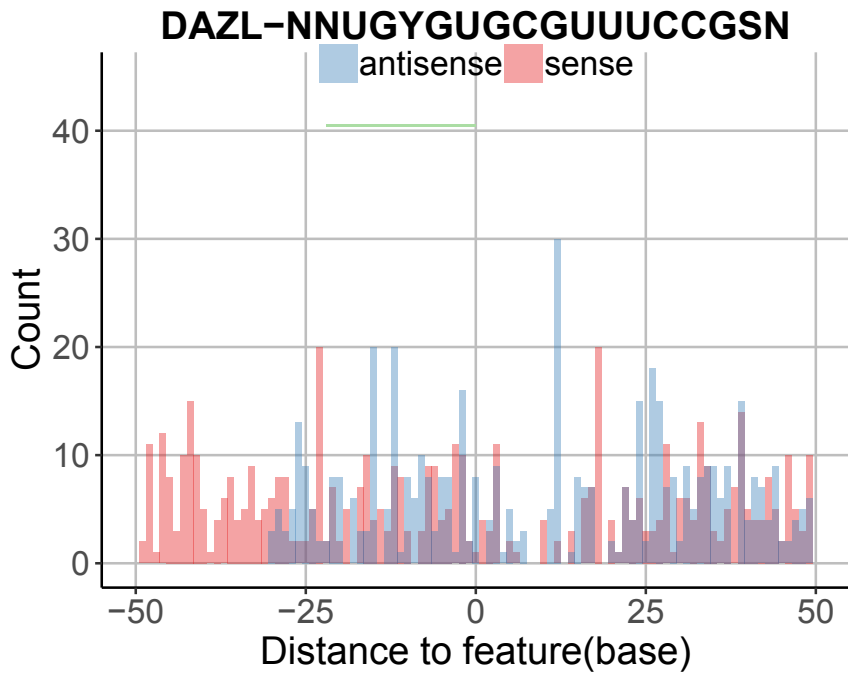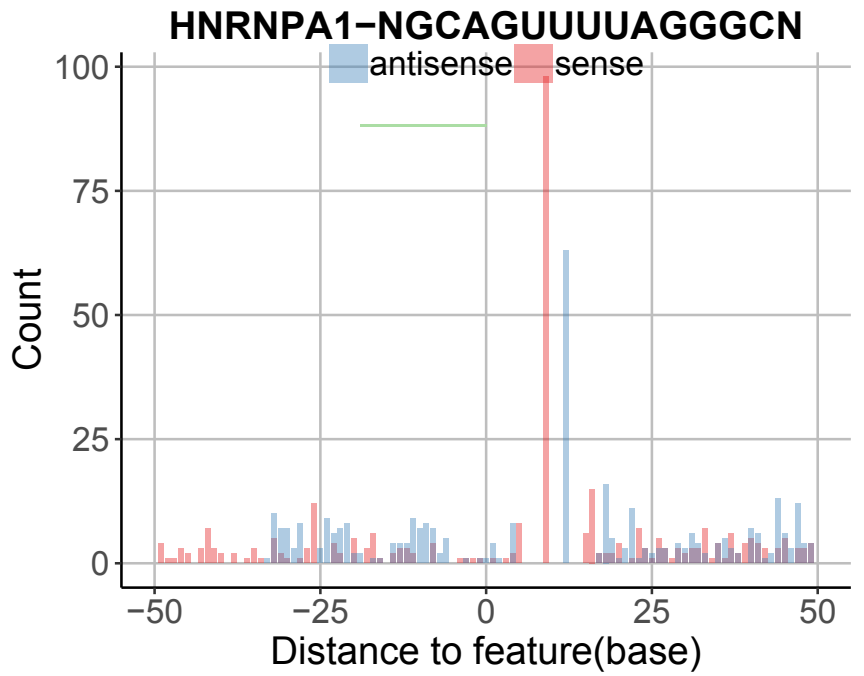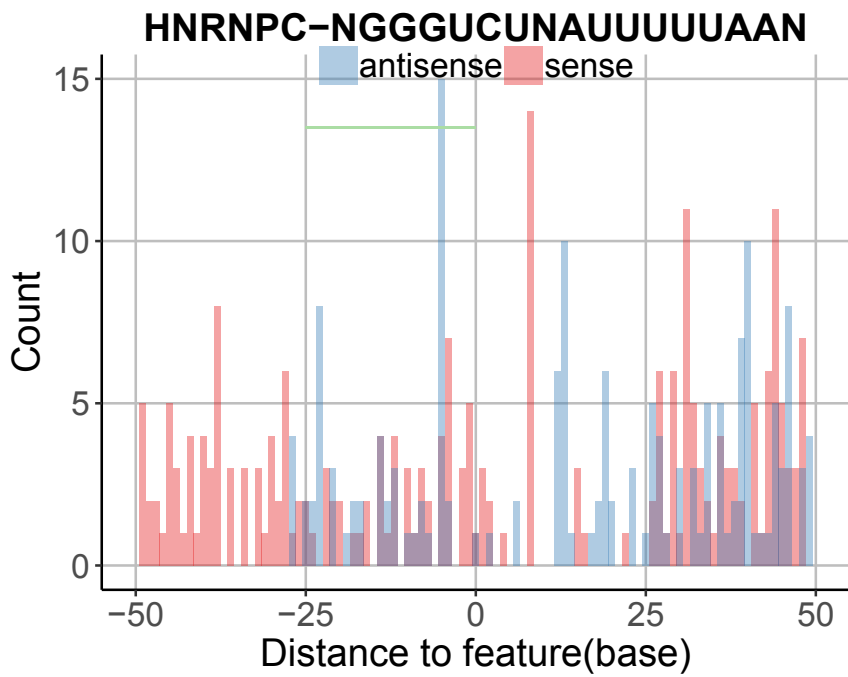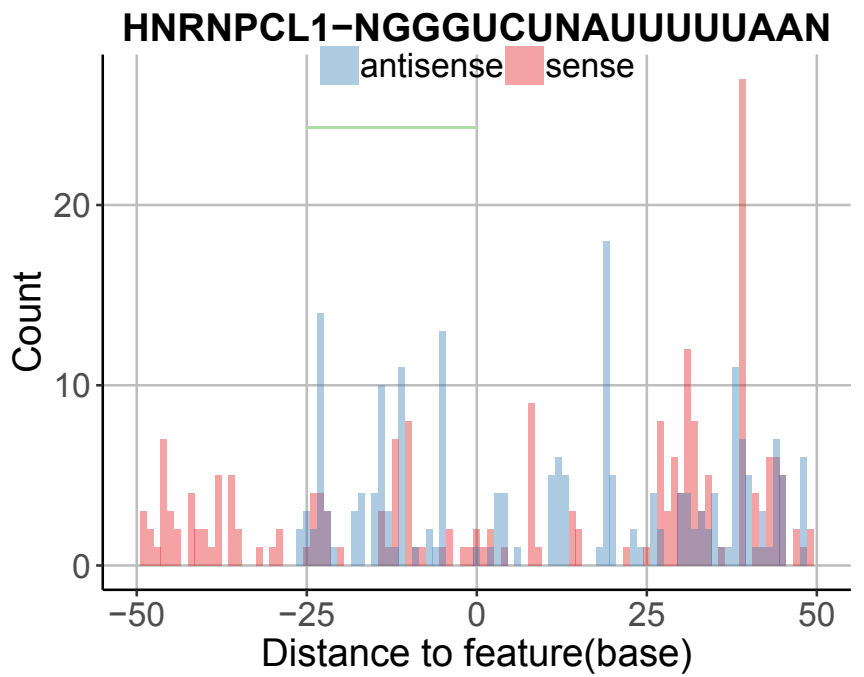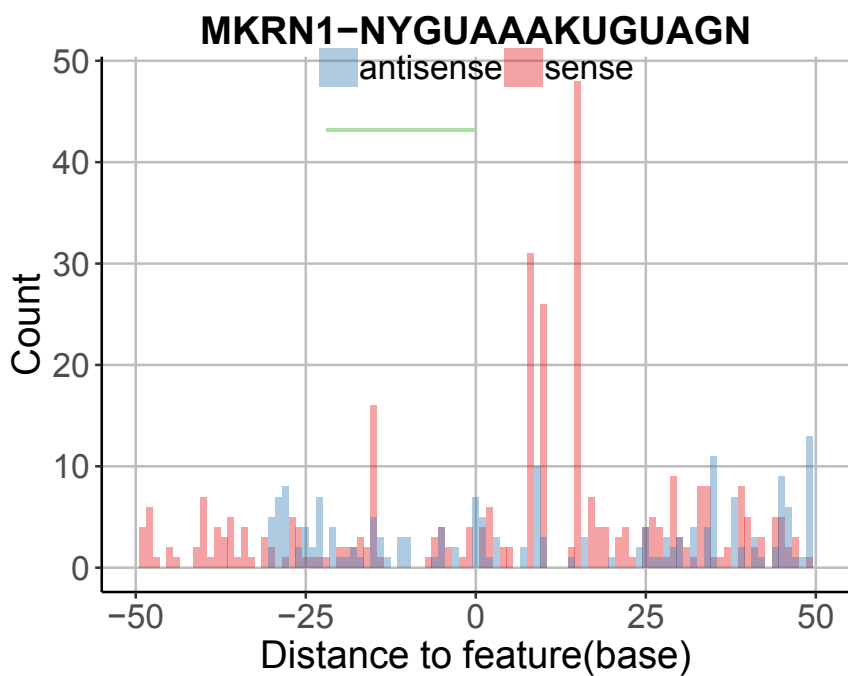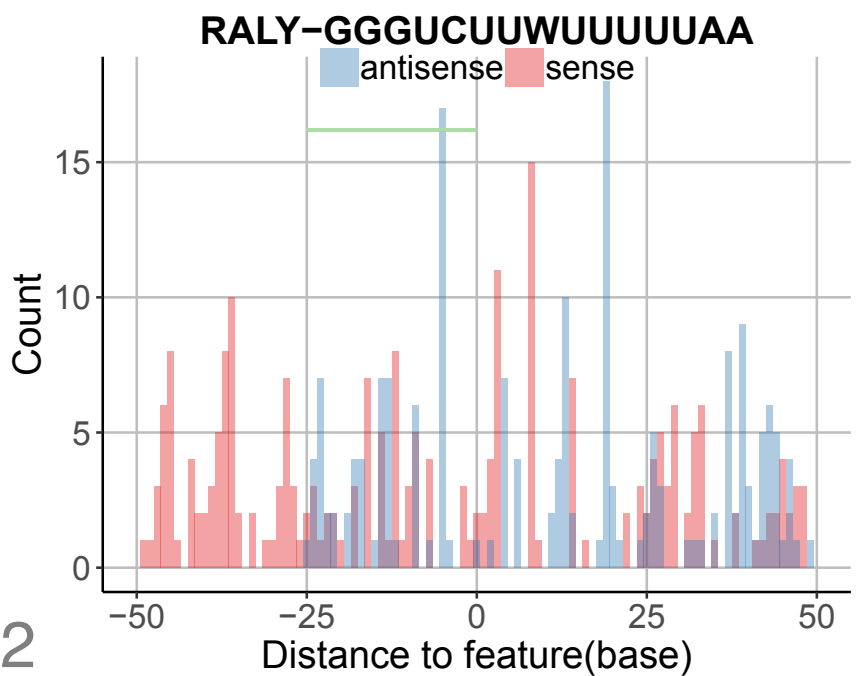

2

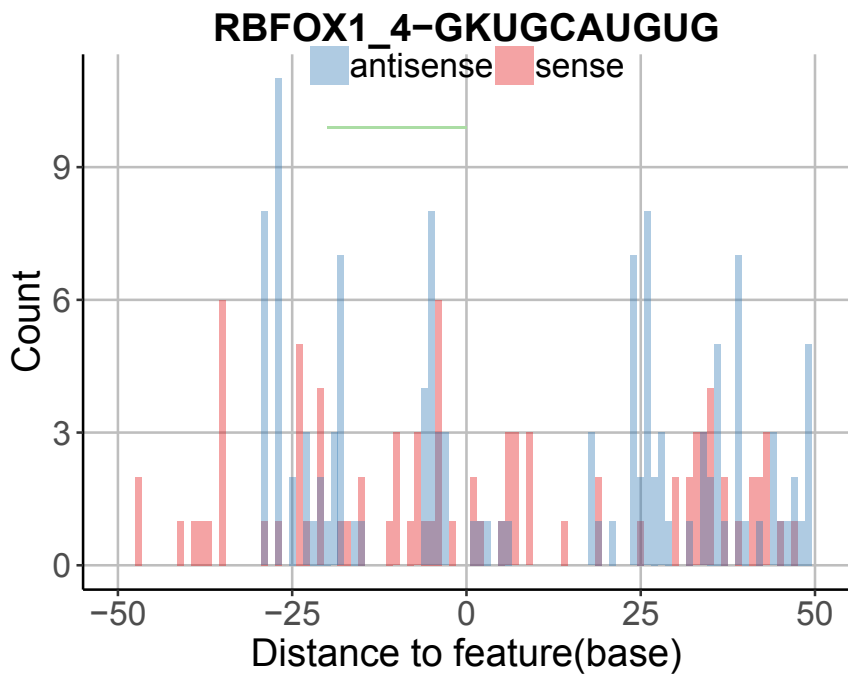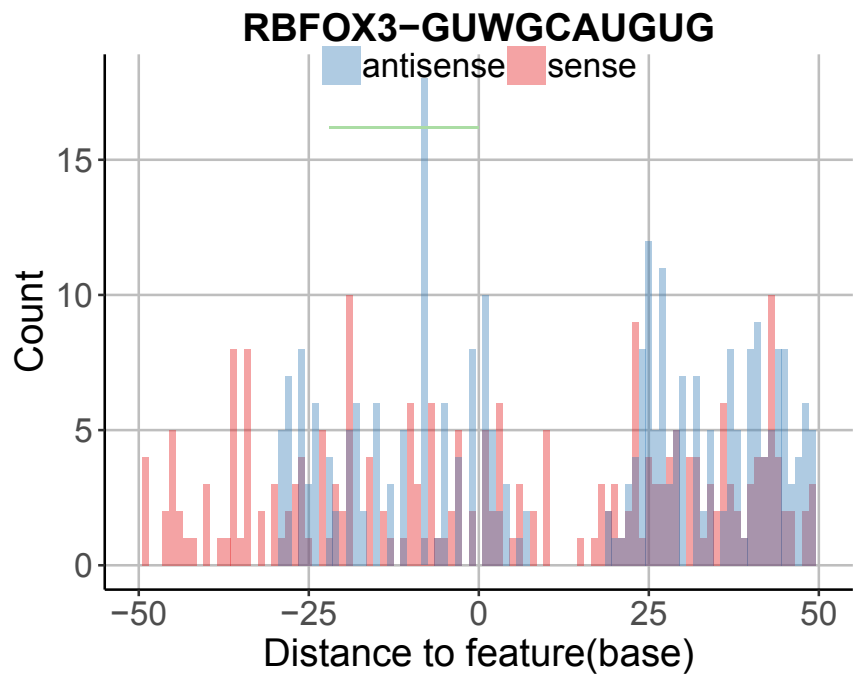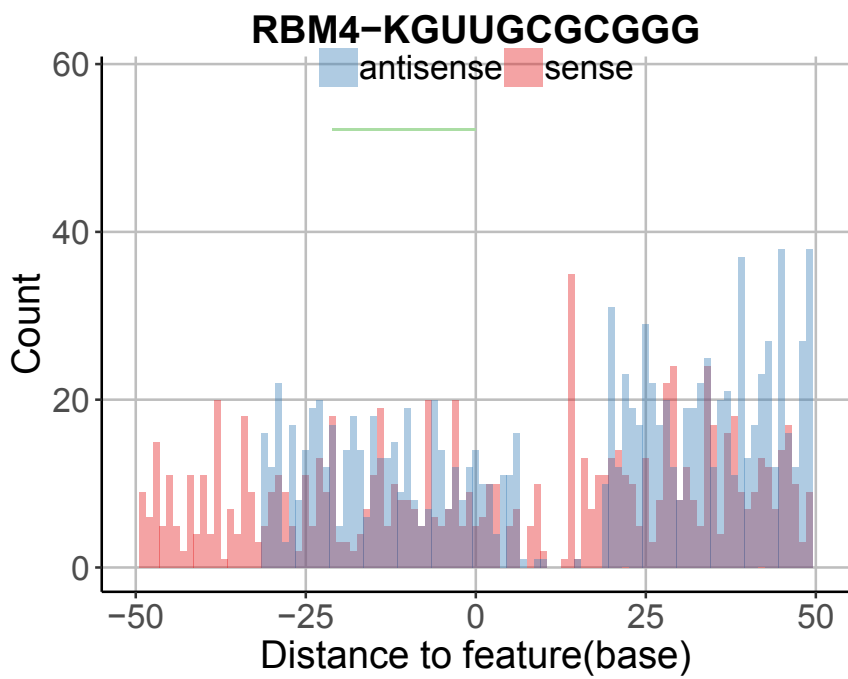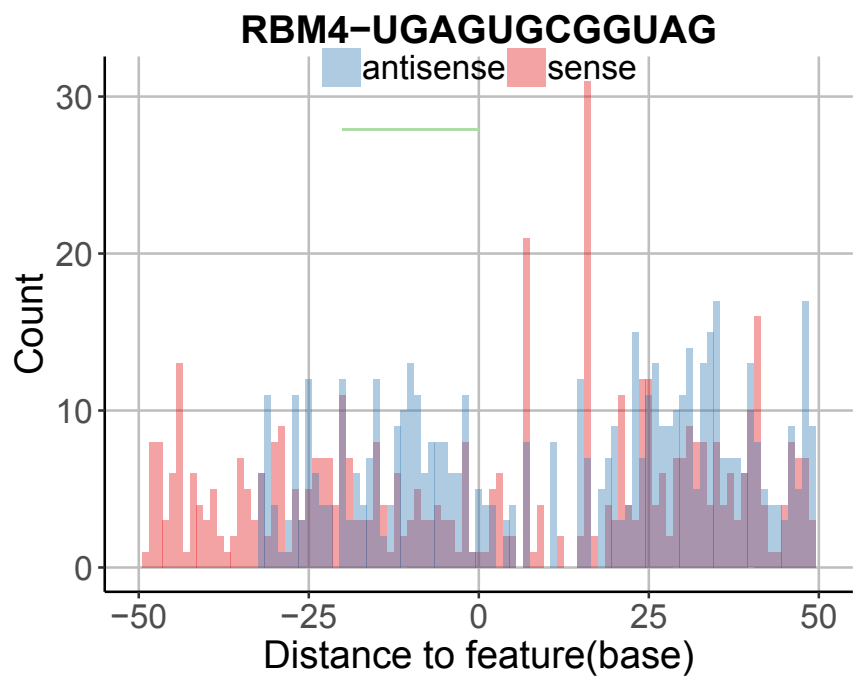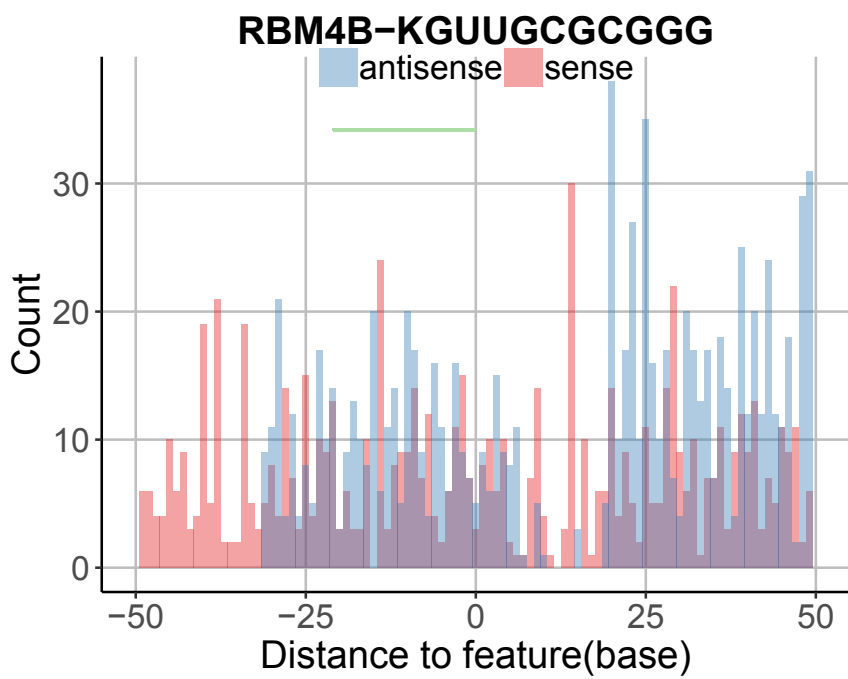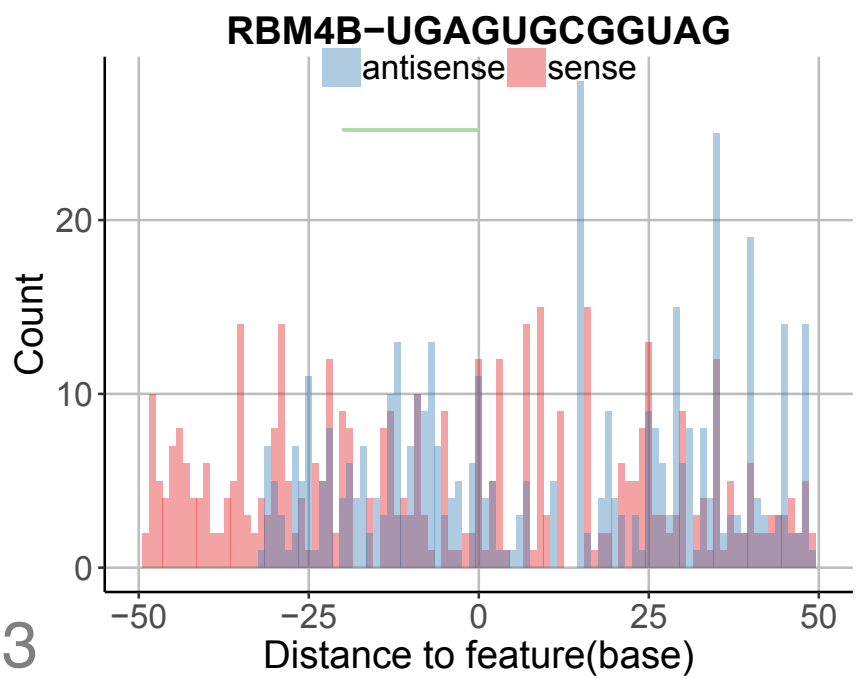

3

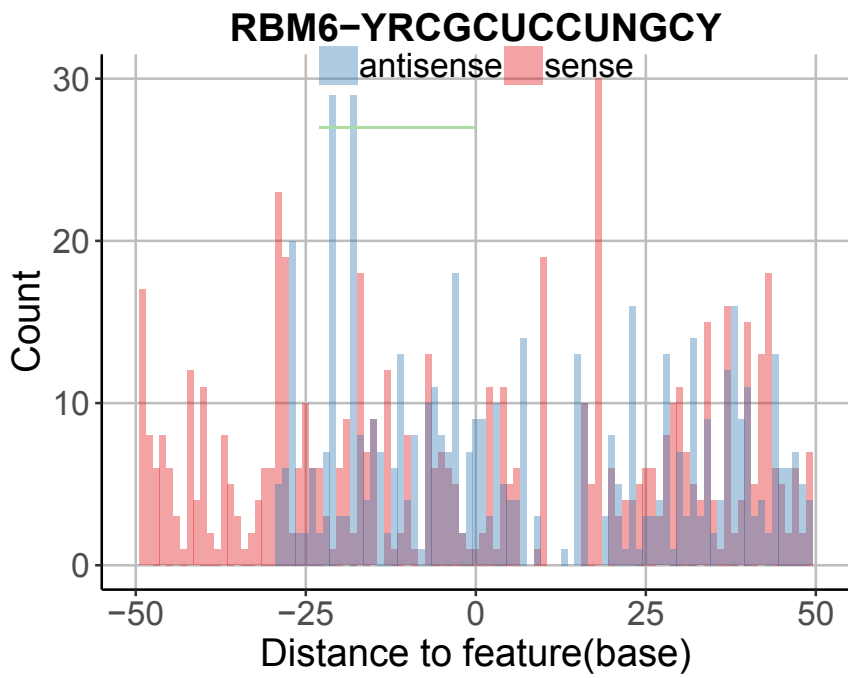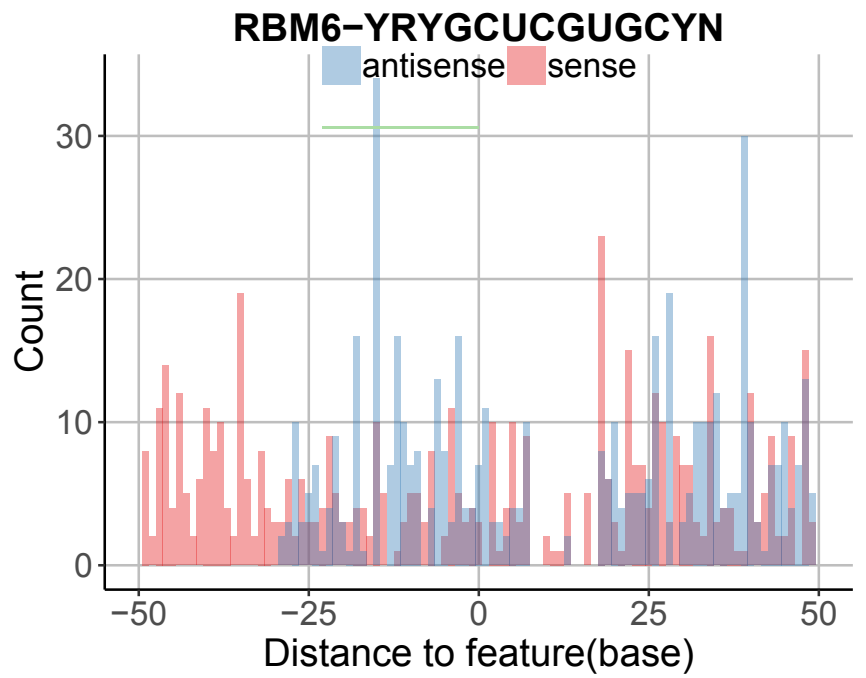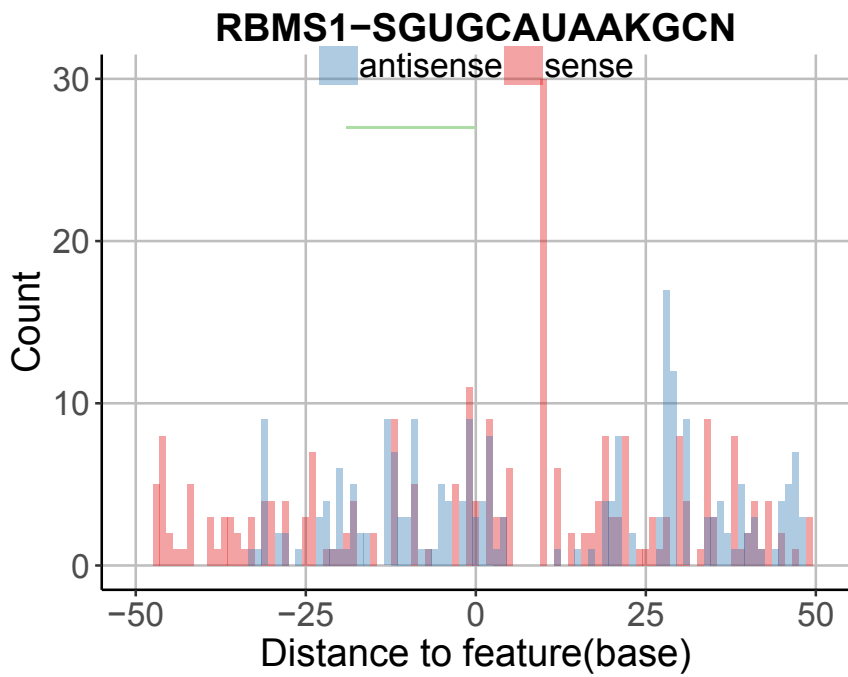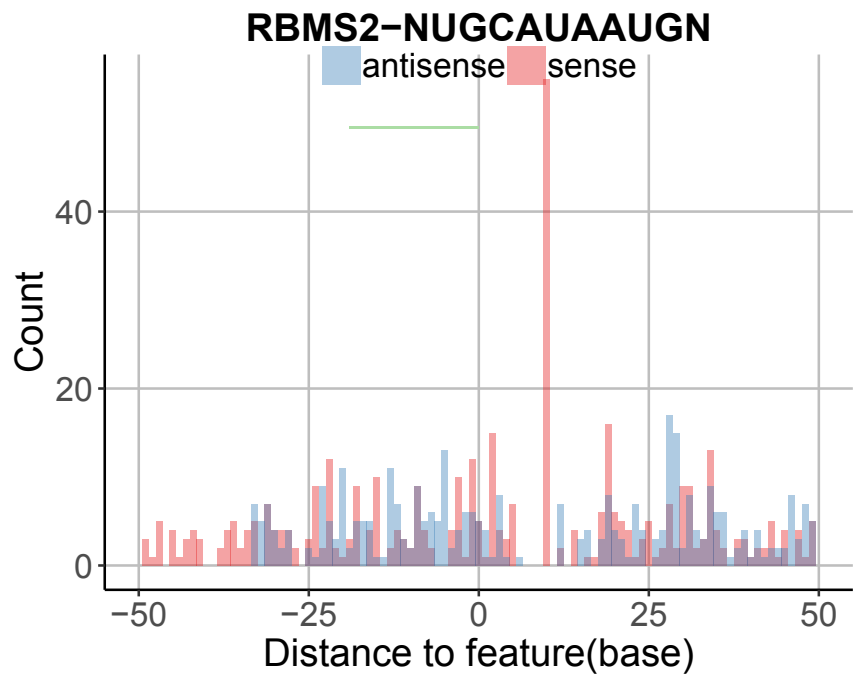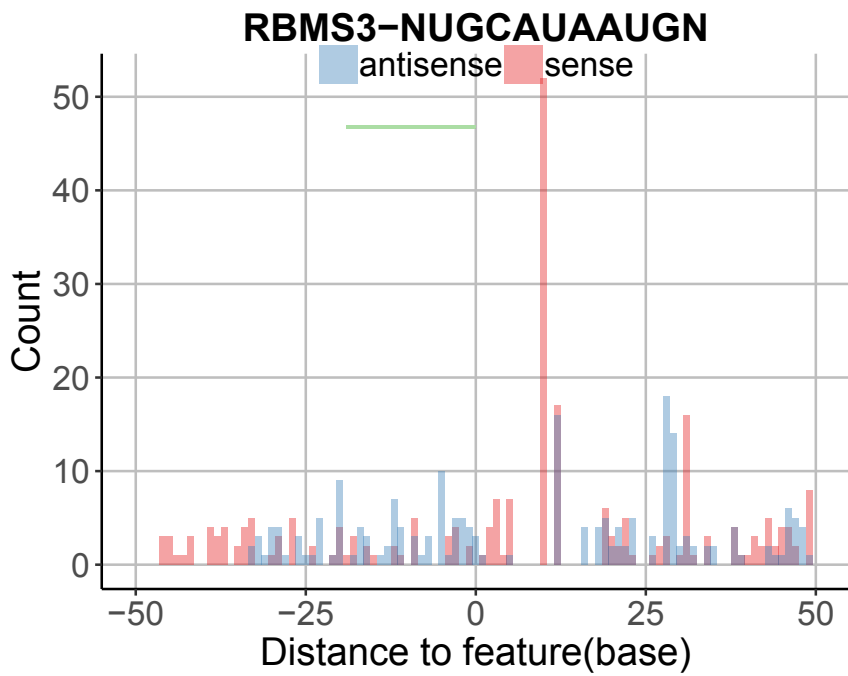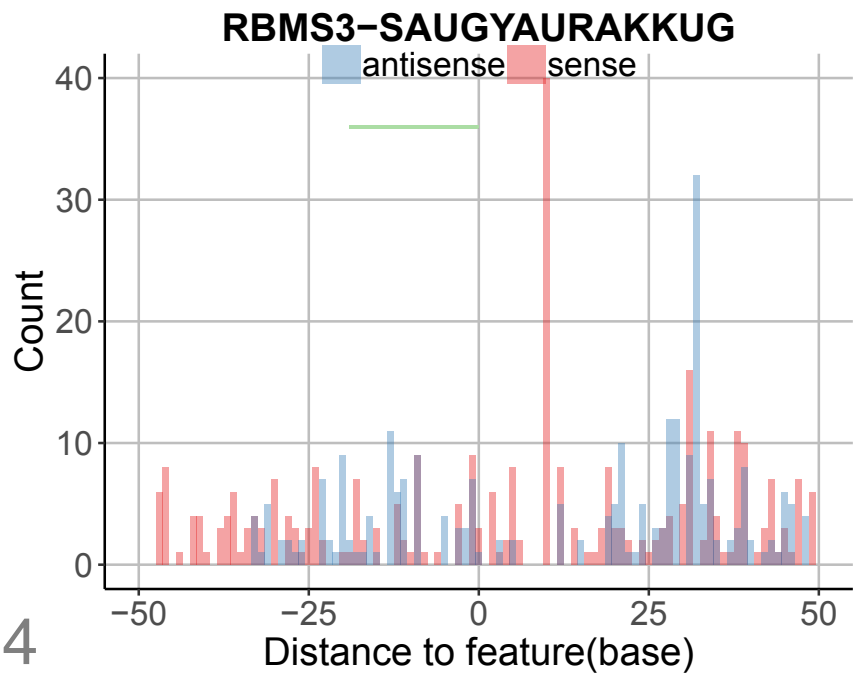

4

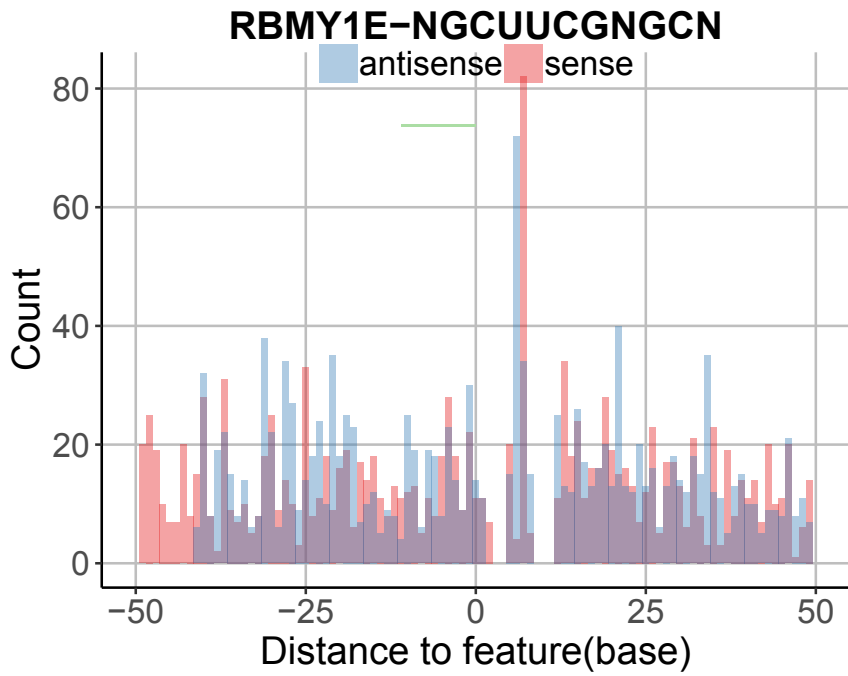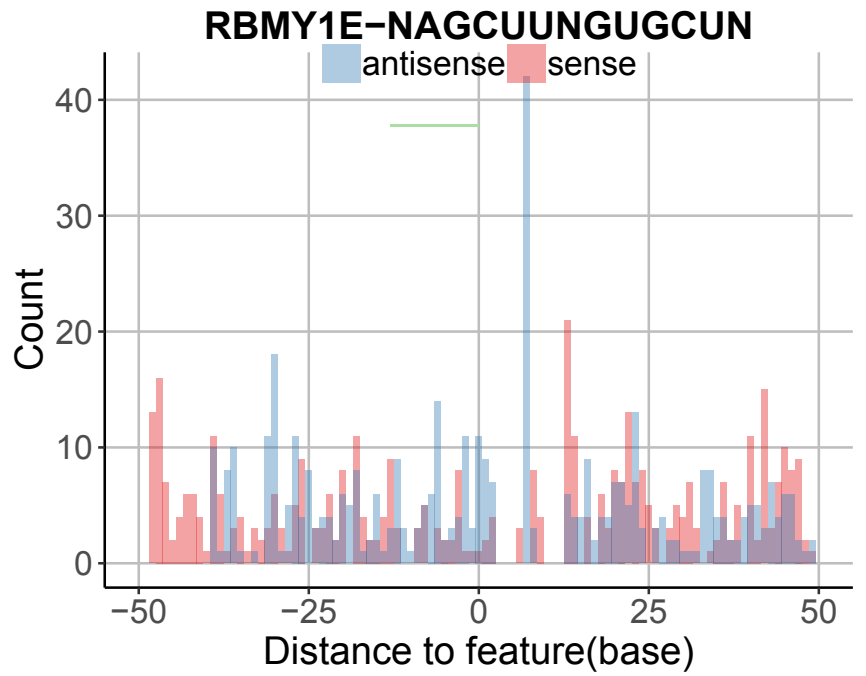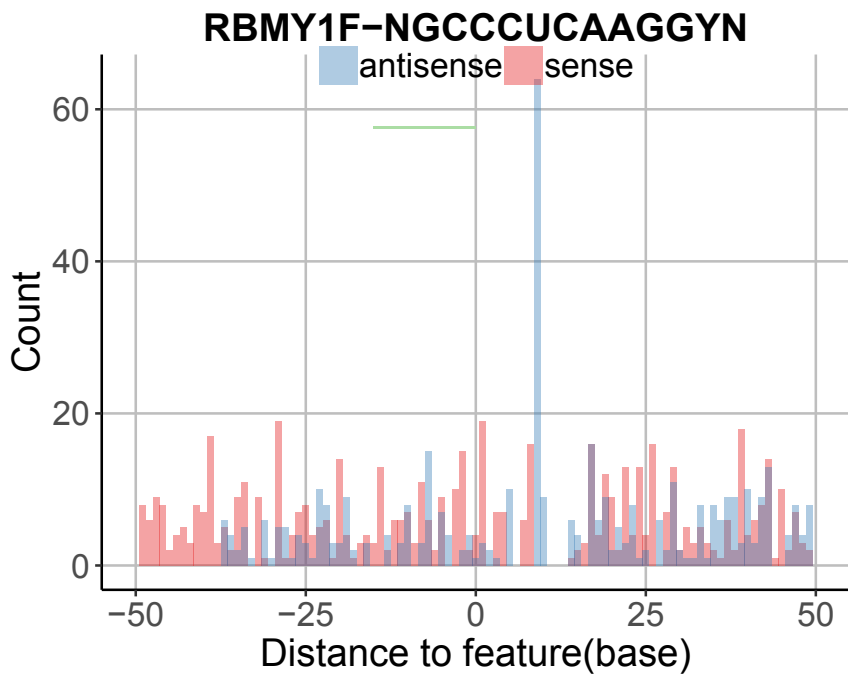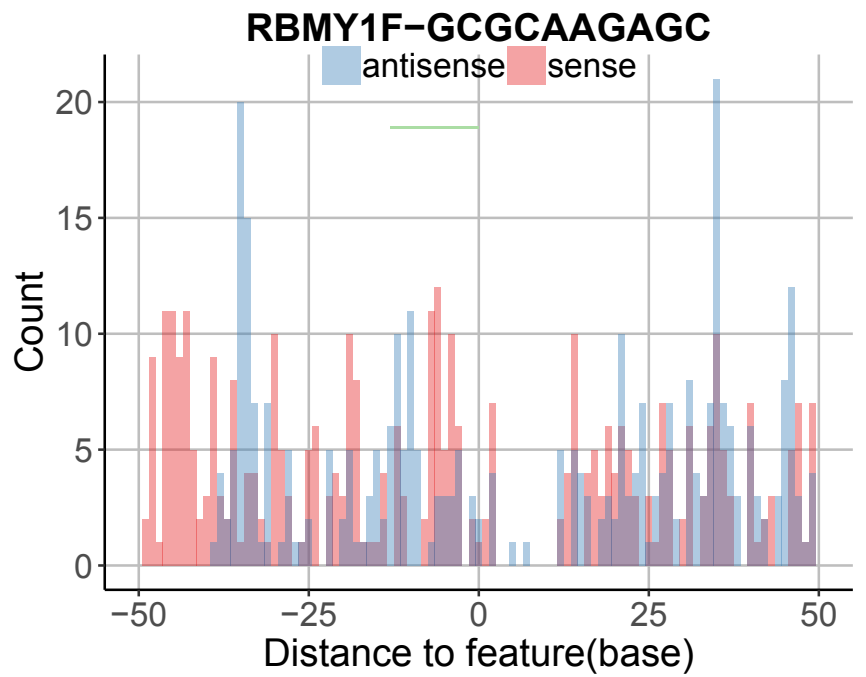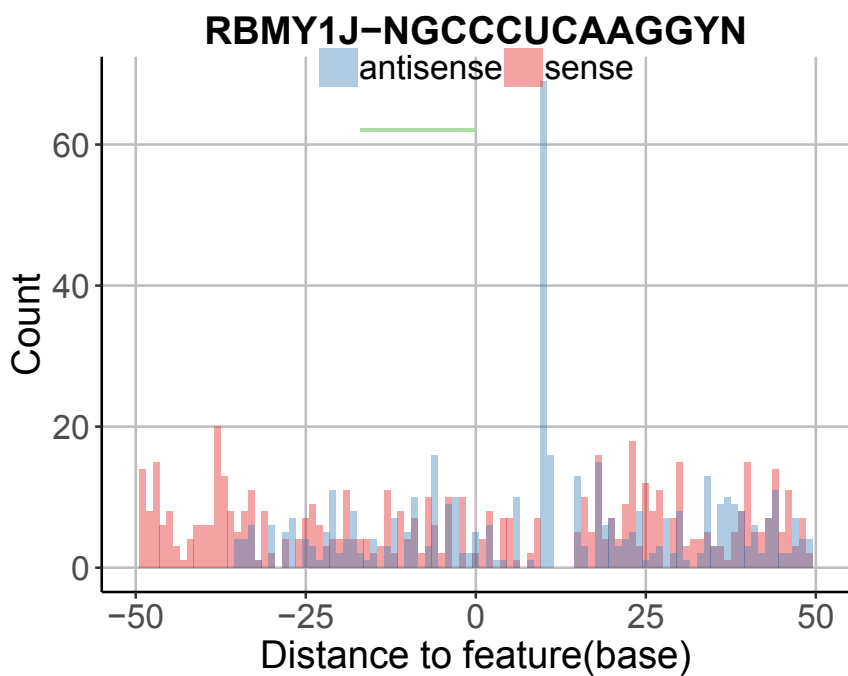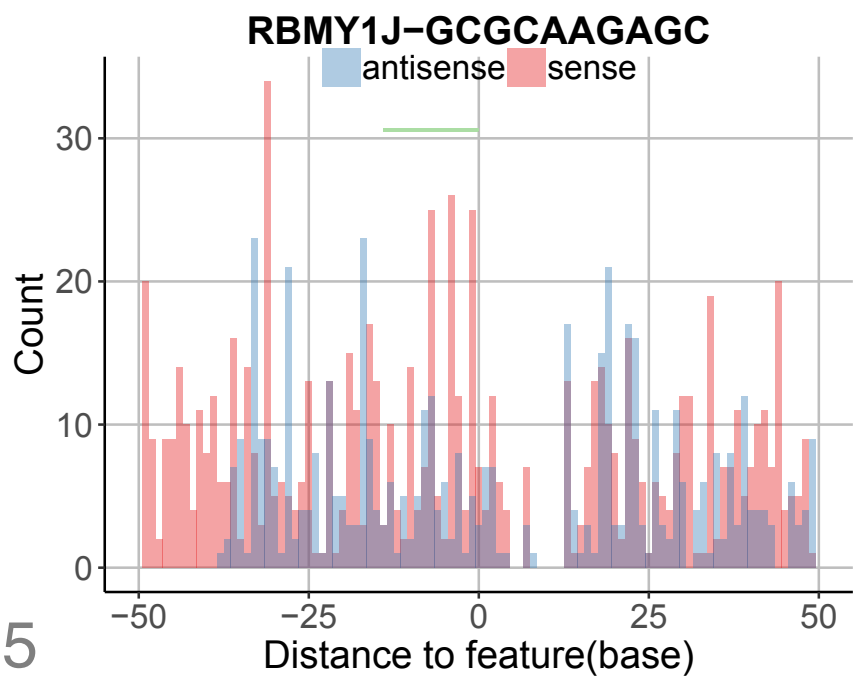

5

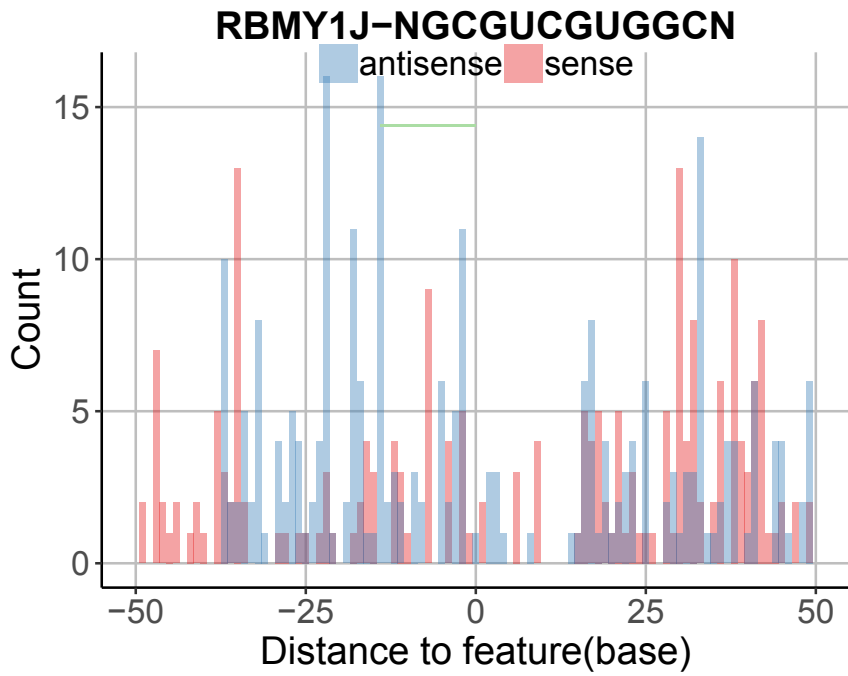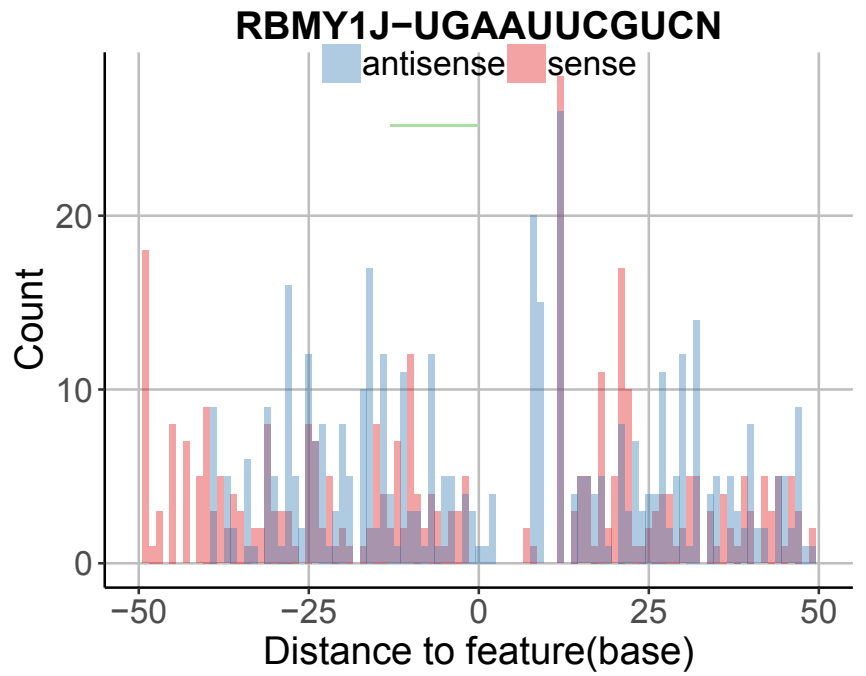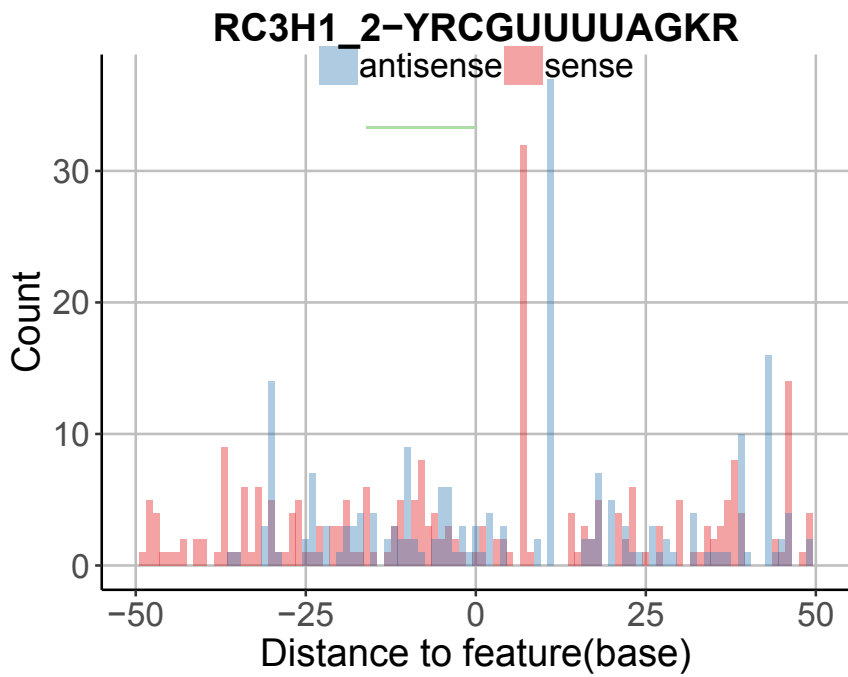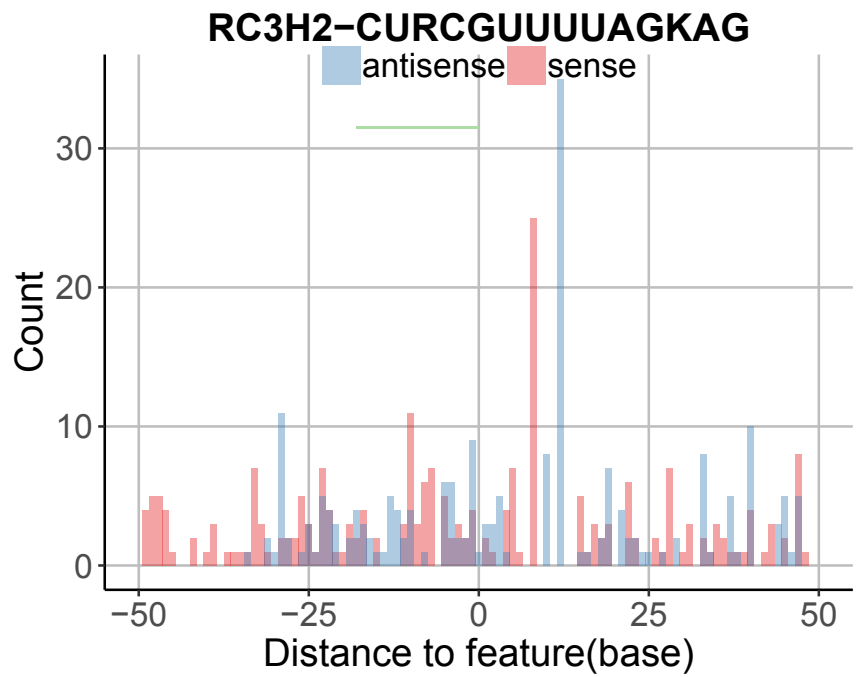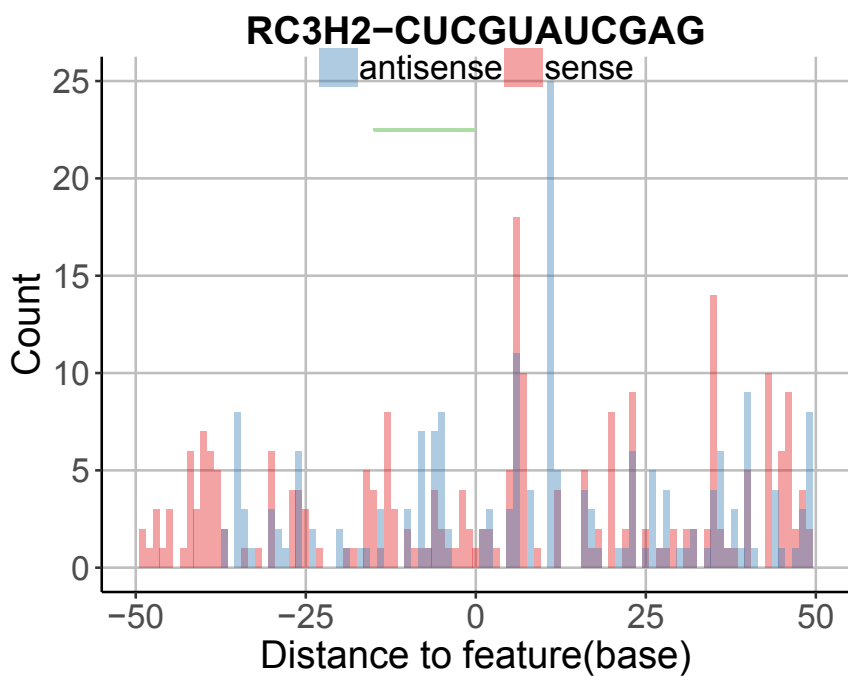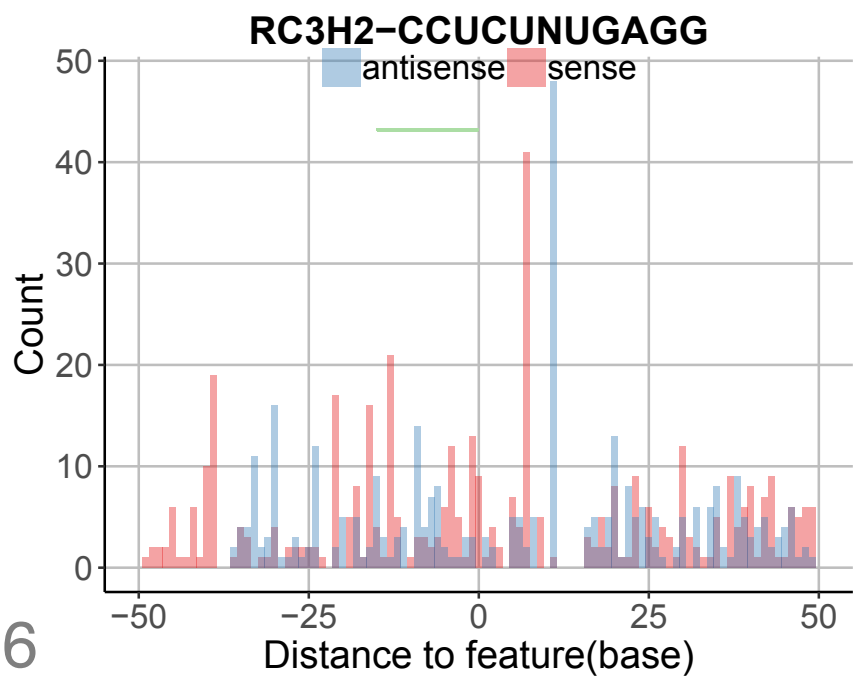

6



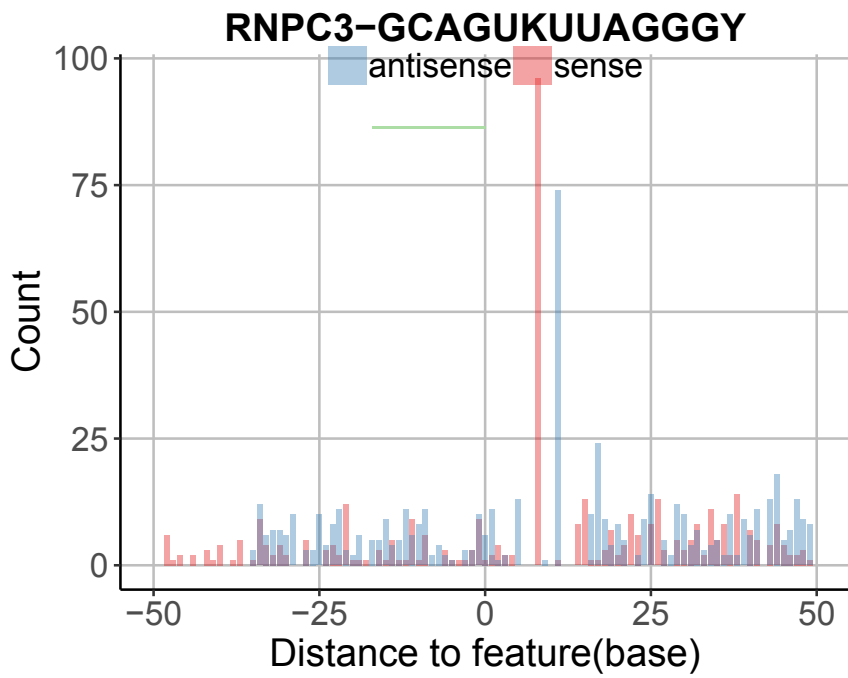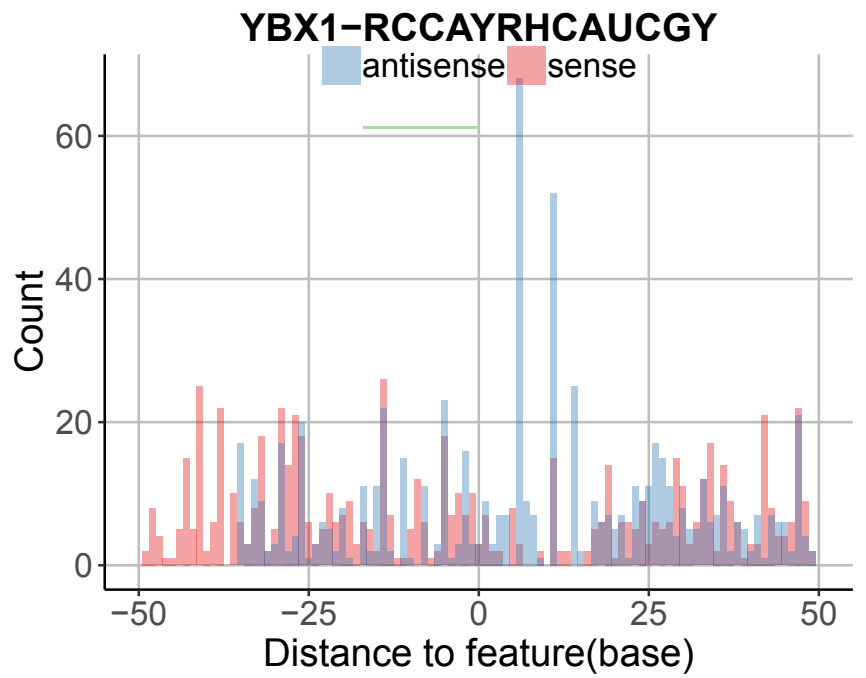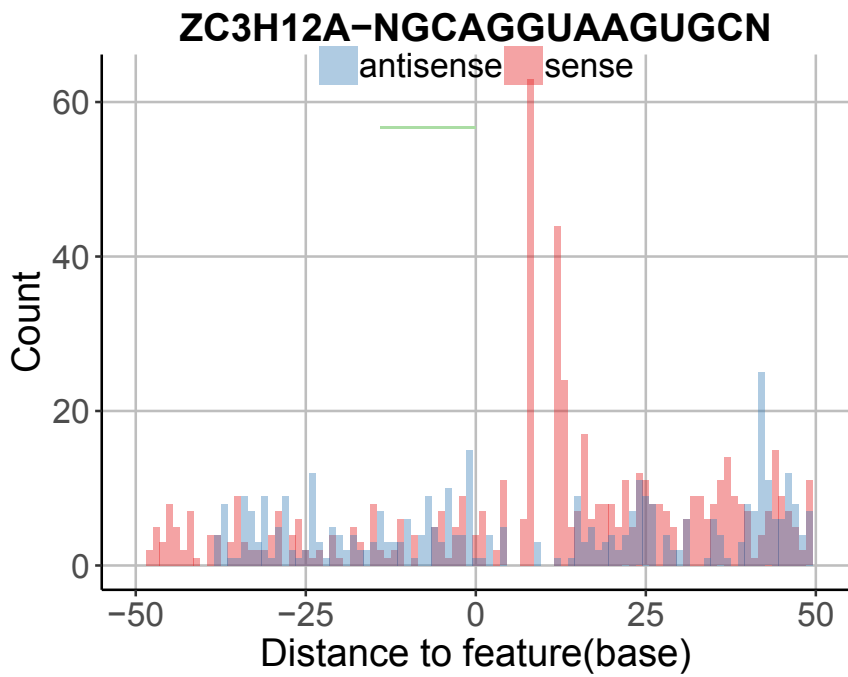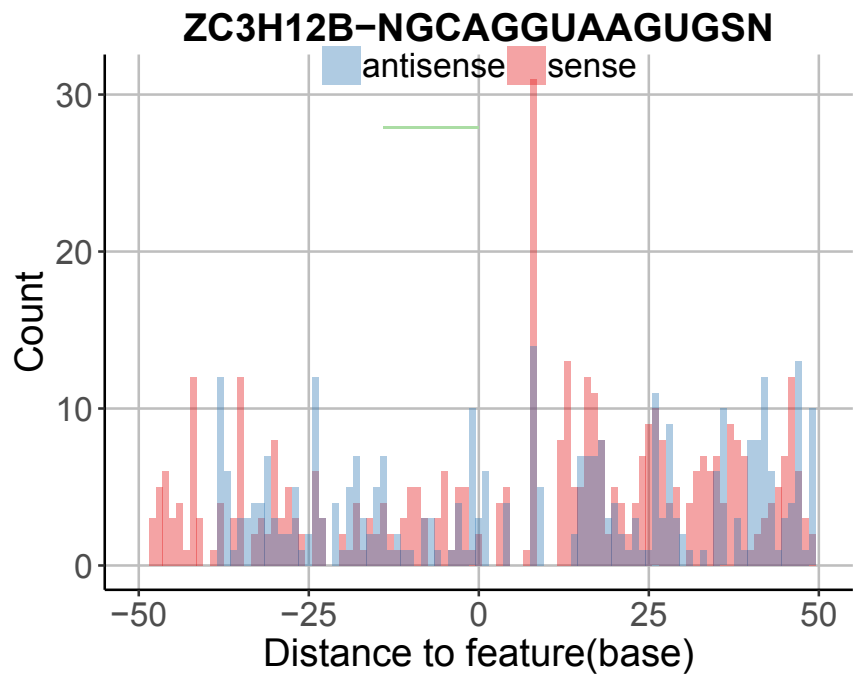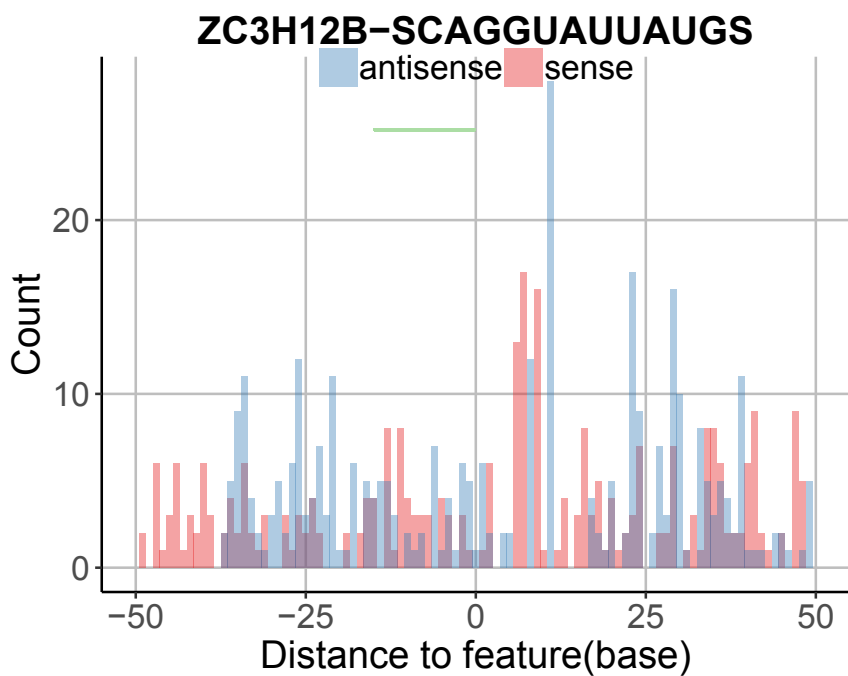

7
