# Supplementary material for: Binding specificities of human RNA-binding proteins toward structured and linear RNA sequences
Source: PubMed Central journal article supplement — Genome Res. 2020 Jul;30(7):962–73. doi: 10.1101/gr.258848.119 (PMC7397871; doi:10.1101/gr.258848.119), 2020-07
Supplement: supp_gr.258848.119_Supplemental_Materials.pdf [file supp_gr.258848.119_Supplemental_Materials.pdf]

1 **Supplemental Materials**

2 **Table of content**

3 Supplemental Methods.....2

4 Protein production.....2

5 Protein-RNA complex crystallization.....2

6 Structure determination and refinement.....3

7 Selection library generation.....3

8 Motif generation.....4

9 GO analysis and *in vivo* enrichment of the motifs.....7

10 Calculation of mutual information .....9

11 Supplemental Figures ..... 11

12 Supplemental Table ..... 32

13 Supplemental Data ..... 32

14 REFERENCES ..... 33

15  
16  
17

## 18 **Supplemental Methods**

19

### 20 **Protein production**

21

22 All constructs described in **Supplemental Table S1** were expressed in Rosetta P3 DE LysS  
23 *E.coli* using the autoinduction protocol described in (Jolma et al. 2015). Proteins were then purified  
24 using HIS-tag based IMAC purification. Protein production was assessed in parallel by 96-well SDS-  
25 PAGE (ePage, Invitrogen; see **Supplemental Fig. S16**). The success rate of protein production was  
26 dependent on the size of the proteins, with most small RBDs expressing well in *E.coli*. Significantly  
27 lower yield of protein was observed for full-length proteins larger than 50 kDa. All proteins were  
28 subjected to HTR-SELEX, regardless of protein level expressed. For interim storage, glycerol was  
29 added to a final concentration of 10%. Samples were split to single-use aliquots with approximately  
30 200 ng RBP in a 5µl volume and frozen at -80°C. Expression and purification of the RNA-binding  
31 domain fragment of human ZC3H12B including PIN (residues 179-354) and Zn-finger (residues 355-  
32 397) domains was performed as described in (Savitsky et al. 2010).

33

### 34 **Protein-RNA complex crystallization**

35

36 The fragment of RNA composed from 21 ribonucleotides used in crystallization trials was  
37 obtained from IDT. The RNA (sequence: 5'-A\*AUGCGACAGUCGGUAGCAUC-3') was protected from  
38 non-specific RNases by phosphorothioation of the 5' end (bond containing sulphur indicated by \*). The  
39 purified and concentrated protein was first mixed with a solution of RNA at a molar ratio 1:1.2 and after  
40 one hour on ice it was subjected to the crystallization trials with several crystallization screens from  
41 different vendors. The first crystals of 0.04 mm size were obtained in Nuc-Pro HTS screen from Jena  
42 Bioscience and they diffracted to 6Å only. The conditions for bigger crystals were optimized in house.  
43 Crystals of 0.1 mm size were grown in sitting drops from solution containing 50 mM Sodium cacodylate  
44 buffer (pH 6.5), 80 mM MgCl<sub>2</sub> and 5% MPD (2-Methyl-2,4-pentanediol). The lifetime of the crystals was

45 short (not more than 48 hours after the crystallization was set), suggesting that the RNA species was slowly  
46 hydrolyzed, possibly by the ZC3H12B RNase itself. The single data set was collected at the beamline P13  
47 at PETRA- III (EMBL, Hamburg, Germany) at 100 K. Data were processed and analyzed with the  
48 autoPROC toolbox (Vonrhein et al. 2011) including the STARANISO routine due to the high anisotropy  
49 (Tickle 2017). The datasets were indexed and integrated by XDS and scaled together with XSCALE.  
50 Statistics of data collection are presented in **Supplemental Table S5**.

51

## 52 **Structure determination and refinement**

53

54 The structure was solved by molecular replacement using the program Phaser (McCoy et al.  
55 2007) as implemented in CCP4 (Winn et al. 2011) with the structure of ZC3H12A PIN-domain  
56 (pdb:3V33) as a search model. The density of the part of RNA was clear near the active site and the  
57 molecule was built manually using COOT (Emsley et al. 2010). The rigid body refinement with  
58 REFMAC5 was followed by restrain refinement with REFMAC5, as implemented in CCP4 (Winn et  
59 al. 2011) and Phenix.refine (Afonine et al. 2012). The manual rebuilding of the model was performed  
60 using COOT. The refinement statistics are presented in **Supplemental Table S5**. The first five amino  
61 acids from N-termini and the Zn-finger part from C-termini were found disordered and were not built  
62 in the maps. The four last nucleotides of the 3'- end were not visible in the maps as well, thus, were not  
63 built to the map also. The protein model was validated using COOT and MOLPROBITY (Chen et al.  
64 2010). The structural figures were prepared using PyMOL(TM) Molecular Graphics System (Version  
65 1.8.6.0, Schrödinger, LLC).

66

## 67 **Selection library generation**

68

69 To produce a library of RNA sequences for selection (selection ligands), we first constructed  
70 dsDNA templates by combining three oligonucleotides together in a three cycle PCR reaction (Phusion,  
71 NEB). The ligand design was similar to that used in our previous work analyzing TF binding

72 specificities in dsDNA (Jolma et al. 2013) except for the addition of a T7 RNA polymerase promoter  
73 in the constant flanking regions of the ligand (fwd primer:  
74 TAATACGACTCACTATAGGGATATCCTCCAcggagtcggcaagcagaagacggcatacg). RNA was  
75 expressed from the DNA-templates using T7 *in vitro* transcription (Ampliscribe T7 High Yield  
76 Transcription Kit, *Epicentre* or Megascript-kit *Ambion*) according to manufacturer's instructions, after  
77 which the DNA-template was digested using RNase-free DNase I (*Epicentre*) or the TURBO-DNase  
78 supplied with the Megascript-kit. All RNA-production steps included RiboGuard RNase-inhibitor  
79 (*Epicentre*).

80 Two different approaches were used to facilitate the folding of RNA molecules. In the protocol  
81 used in experiments where the batch identifier starts with letters "EM", RNA-ligands were heated to  
82 +70°C followed by gradual, slow cooling to allow the RNA to fold into minimal energy structures,  
83 whereas in batches "AAG" and "AAH" RNA transcription was not followed by such folding protocol.  
84 The rationale was that spontaneous co-transcriptional RNA-folding may better reflect folded RNA  
85 structures in the *in vivo* context. In almost all of the cases where the same RBPs were tested with both  
86 of the protocols the results were highly similar.

87

## 88 **Motif generation**

89

90 The motifs were generated based on Autoseed; Autoseed identifies gapped and ungapped kmers  
91 that represent local maximal counts relative to similar sequences within their Huddinge neighborhood  
92 (Nitta et al. 2015). It then generates a draft motif using each such kmer as a seed. This procedure makes  
93 each generated PWM motif distinctly different from any other motif derived from the same data, by  
94 ensuring that the count for each seed is higher than that of any subsequence that is shifted by one base,  
95 or within a Hamming distance of one from the seed (see **Supplemental Fig. S19B**, and Supplementary  
96 Figure 1 of Nitta et al., 2015). It is important to note that the resulting motifs are not generated from a  
97 single set of aligned sequences, and that therefore the count for the base representing the consensus  
98 sequence is constant, whereas the total counts in each column vary (Jolma et al. 2013).

99           This initial set of motifs is then refined manually to identify the final seeds (**Supplemental**  
100 **Table S2**). The manual curation process was necessary to remove artefacts due to selection bottlenecks  
101 (low complexity libraries), partial motifs that included constant linker sequences (displayed a strong  
102 positional bias on the ligand), and motifs that were recovered from a large number of experiments; the  
103 motifs recovered from many experiments were removed because they represent common “aptamer”  
104 motifs that are enriched by the HTR-SELEX process itself, for example due to residual presence of  
105 *E.coli* derived RNA-binding proteins, or binding of folded “aptamer” RNAs to the TRX fusion partner,  
106 selection beads or plasticware (**Supplemental Fig. S19C**). To assess initial data, we compared the  
107 deduced motifs to known motifs, to replicate experiments (same experiment run again or separate  
108 experiment using full-length and RBD clones) and experiments performed with paralogous proteins.  
109 We also note that each cycle of HTR-SELEX independently enriches motifs over the input cycle,  
110 providing further evidence of reproducibility. Individual results that were not supported by replicate or  
111 prior experimental data were deemed inconclusive and were not included in the final dataset. Draft  
112 models were manually curated (by AJ, JT, QM, TRH) to remove unsuccessful experiments and artefacts  
113 due to bottlenecks and aptamer selection (see above), and final models were generated using the seeds  
114 indicated in **Supplemental Table S2**.

115           Autoseed detected more than one seed for many RBPs. Up to four seeds were used to generate  
116 a maximum of two unstructured and two structured motifs. Of these, the motif with largest number of  
117 seed matches using the multinomial setting indicated on **Supplemental Table S2** was designated the  
118 primary motif. The motif with the second largest number of matches was designated the secondary  
119 motif. The counts of the motifs represent the prevalence of the corresponding motifs in the sequence  
120 pool (**Supplemental Table S2**). Only these primary and secondary motifs were included in further  
121 analyses. Such additional motifs are shown for LARP6 in **Supplemental Fig. S10**.

122           To find RBPs that bind to dimeric motifs, we visually examined the PWMs to find direct repeat  
123 pattern of three or more base positions, with or without a gap between them (see **Supplemental Table**  
124 **S2**). The presence of such repetitive pattern could be either due to dimeric binding, or the presence of  
125 two RBDs that bind to similar sequences in the same protein.

126 To identify structured motifs, we visually investigated the correlation diagrams for each seed  
127 to find motifs that displayed the diagonal pattern evident in **Fig. 2B**. The plots display effect size and  
128 maximal sampling error, and show the deviation of nucleotide pair distribution from what is expected  
129 from the distribution of the individual nucleotides. For each structured motif, SLM models  
130 (**Supplemental Table S3**) were built from sequences matching the indicated seeds; a multinomial 2  
131 setting was used to prevent the paired bases from influencing each other. Specifically, when the number  
132 of occurrences of each pair of bases was counted at the base-paired positions, neither of the paired bases  
133 was used to identify the sequences that were analyzed. The SLMs were visualized either as the T-shaped  
134 logo (**Fig. 3**) or as a PWM type logo where the bases that constitute the stem were shaded based on the  
135 total fraction of A:U, G:C and G:U base pairs.

136 To control for potential secondary structure bias introduced by the constant linker regions, we  
137 used the program RNAfold (Lorenz et al. 2011) to fold a set of full ligands, containing 40 bp random  
138 sequences flanked by the linkers. This analysis revealed that the constant linkers did not impose a  
139 stereotypic secondary structure on the random sequence (**Supplemental Fig S15**), indicating that the  
140 random sequences can adopt many secondary structures that are known to be important for RBP  
141 binding, such as stem-loops and internal loops, even in the context of the flanking constant linkers.

142 For analysis of RNA structure in **Fig. 2** and **Supplemental Fig. S6**, sequences matching the  
143 regular expression NNNNCAGU[17N]AGGCNNN or sequences of the three human collagen gene  
144 transcripts (From 5' untranslated and the beginning the coding sequence, the start codon is marked with  
145 bold typeface: COL1A1 -CCACAAAGAGUCUACAUGUCUAGGGUCUAG-  
146 ACAUGUUCAGCUUUGUGG; COL1A2- CACAAGGAGUCUGCAUGUCUAAGUGCUAGA-  
147 CAUGCUCAGCUUUGUG and COL3A1 - CCACAAAGAGUCUACAUGGGUCAUGUUCAG-  
148 CUUUGUGG) were analyzed using “RNAstructure” software (Mathews 2014) through the web-  
149 interface in:<http://rna.urmc.rochester.edu/RNAstructureWeb/Servers/Fold/Fold.html> using default  
150 settings. All structures are based on the program’s minimum energy structure prediction. For analysis  
151 in **Fig. 3**, we extracted all sequences that matched the binding sequences of MKRN1 and ZRANB2  
152 (GUAAAKUGUAG and NNNGGUAAGGUNN, respectively; N denotes a weakly specified base)  
153 flanked with ten bases on both sides from the cycle four of HTR-SELEX. Subsequently, we predicted

154 their secondary structures using the program RNAfold (Vienna RNA package; (Lorenz et al. 2011))  
155 followed by counting the predicted secondary structure at each base position in the best reported model  
156 for each sequence. For both RBPs, the most common secondary structure for the bases within the  
157 defined part of the consensus (GUAAAKUGUAG and GGUAAGGU) was the fully single stranded  
158 state (82% and 30% of all predicted structures, respectively). To estimate the secondary structure at the  
159 flanks, the number of paired bases formed between the two flanks were identified for each sequence.  
160 Fraction of sequences with specific number of paired bases are shown in **Fig. 3**.

161

162

### 163 **GO analysis and *in vivo* enrichment of the motifs**

164

165 To determine whether RBPs with similar RBDs recognize and bind to similar targets, we  
166 compared the sequences of the RBDs and their motifs. First, the RBPs were classified based on the type  
167 and number of RBDs. For each class, we then extracted the amino-acid sequence of the RBPs starting  
168 from the first amino acid of the first RBD and ending at the last amino acid of the last RBD. We also  
169 confirmed the annotation of the RBDs by querying each amino acid sequence against that SMART  
170 database, and annotated the exact coordinates of the domains through the web-tools: [http://smart.embl-](http://smart.embl-heidelberg.de)  
171 [heidelberg.de](http://smart.embl-heidelberg.de) and <http://smart.embl-heidelberg.de/smart/batch.pl>. Sequence similarities and trees were  
172 built using PRANK (Loytynoja and Goldman 2005) (parameters: -d, -o, -showtree). The structure of  
173 the tree representing the similarity of the domain sequence was visualized using R (version 3.3.1).

174 For identification of classes of transcripts that are enriched in motif matches for each RBP, we  
175 extracted the top 100 transcripts according to the score density of each RBP motif. These 100 transcripts  
176 were compared to the whole transcriptome to conduct the GO enrichment analysis for each motif using  
177 the R package ClusterProfiler (version 3.0.5).

178 To analyze conservation of motif matches, sites recognized by each motif were searched from  
179 both strands of 100 bp windows centered at the features of interest (acceptor, donor sites) using the  
180 MOODS program (version 1.0.2.1). For each motif and feature type, 1000 highest affinity sites were

181 selected for further analysis regardless of the matching strand. Whether the evolutionary conservation  
182 of the high affinity sites was explained by the motifs was tested using program SiPhy (version 0.5, task  
183 16, seedMinScore 0) and multiz100way multiple alignments of 99 vertebrate species to human  
184 (downloaded from UCSC genome browser, version hg38). A site was marked as being conserved  
185 according to the motif if its SiPhy score was positive meaning that the aligned bases at the site were  
186 better explained by the motif than by a neutral evolutionary model (hg38.phastCons100way.mod  
187 obtained from UCSC genome browser). Two motifs (see Supplemental Table S2) were excluded from  
188 the analysis because the number of high affinity sites that could be evaluated by SiPhy was too small.  
189 The hypothesis that the motif sites in the sense strand were more likely to be conserved than sites in the  
190 antisense strand was tested against the null hypothesis that there was no association between site strand  
191 and conservation using Fisher's exact test (one-sided). The P values given by the tests for individual  
192 motifs were corrected for multiple testing using Holm's method. We note here that evidence obtained  
193 using this method establishes that the sequence under the motif matches is under purifying selection  
194 (not evolving according to the used neutral model), and is more conserved than the sequence under  
195 reverse complement matches. However, it can still be that the match sequences have another function,  
196 which can be either related (binding to a related protein) or unrelated (binding to a different class of  
197 regulator, e.g. spliceosome) to the biological mechanism of interest (RNA binding by the RBP protein).

198 To assess the utility of the produced motifs in predicting *in vivo* target sites (**Supplemental**  
199 **Fig. S20**), they were used to predict bound sequences in eCLIP from the ENCODE portal (Davis et al.  
200 2018). To compare HTR-SELEX with established methods, peaks from eCLIP experiments (see  
201 **Supplemental Table S8** for the accession numbers and details of the used datasets) were downloaded  
202 for proteins which had both an HTR-SELEX motif and an available RNAcompete motif on the CISBP-  
203 RNA database (Ray et al. 2013). RBFOX1 motifs were used in prediction of RBFOX2 eCLIP peaks as  
204 previous analysis has indicated that the proteins have identical RRM s (Chen et al. 2016). All peaks  
205 were extended by 20 bases upstream to account for RBP binding at the 5' end of the peak. A control set  
206 was created by taking length-matched sequences 300 bases upstream of each extended peak. The eCLIP  
207 peaks and control sets were scanned using the HTR-SELEX and RNAcompete motifs, and the max



208 score per sequence was taken. The ability of the motif to discriminate between the two sets was  
209 evaluated by calculating the area under the ROC curve (AUROC).

210 The preference of RBFOX1 for binding to a hairpin loop structure was determined by first  
211 folding the eCLIP peaks and control sequences using RNAfold with the “-p” option to determine the  
212 centroid structure (Lorenz et al. 2011). Before folding, 50 flanking bases were added to both ends of  
213 each sequence to provide greater context for defining the structure and were removed after folding.  
214 Occurrences of the sequence “GCAUG” in peak and control sets were counted within hairpin loops and  
215 in other structural contexts.

216

### 217 **Calculation of mutual information**

218

219 The global pattern of motifs across the features tested was analyzed by calculating the mutual  
220 information (MI) between 3-mer distributions at two non-overlapping positions of the aligned RNA  
221 sequences. MI can be used for such analysis, because if a binding event contacts two continuous or  
222 spaced 3-bp wide positions of the sequences at the same time, the 3-mer distributions at these two  
223 positions will be correlated. Such biased joint distribution can then be detected as an increase in MI  
224 between the positions.

225 Specifically, MI between two non-overlapping positions (pos1, pos2) was estimated using the  
226 observed frequencies of a 3-mer pair (3+3-mer), and of its constituent 3-mers at both positions:

$$227 \quad MI(pos1, pos2) = \sum P(3+3-mer) \log_2 \frac{P(3+3-mer)}{P_{pos1}(3-mer)P_{pos2}(3-mer)}$$

228 where  $P(3+3-mer)$  is the observed probability of the 3-mer pair (i.e. gapped or ungapped 6 mer).  $P_{pos1}(3-$   
229  $mer)$  and  $P_{pos2}(3-mer)$ , respectively, are the marginal probabilities of the constitutive 3-mers at position  
230 1 and position 2. The sum is over all possible 3-mer pairs.

231 To focus on RBPs that specifically bind to a few closely related sequences, such as RBPs with  
232 well-defined motifs, it is possible to filter out most background non-specific bindings (e.g., selection  
233 on the shape of RNA backbone) by restricting the MI calculation, to consider only the most enriched

234 3-mer pairs for each two non-overlapping positions. Such enriched 3-mer pair based mutual  
235 information (E-MI) is calculated by summing MI over top-10 most enriched 3-mer pairs.

236 
$$E-MI(pos1, pos2) = \sum_{top\ 3+3\text{-mers}} P(3+3\text{-mer}) \log \frac{P(3+3\text{-mer})}{P_{pos1}(3\text{-mer})P_{pos2}(3\text{-mer})}$$

237

238 **Supplemental Figures**

239

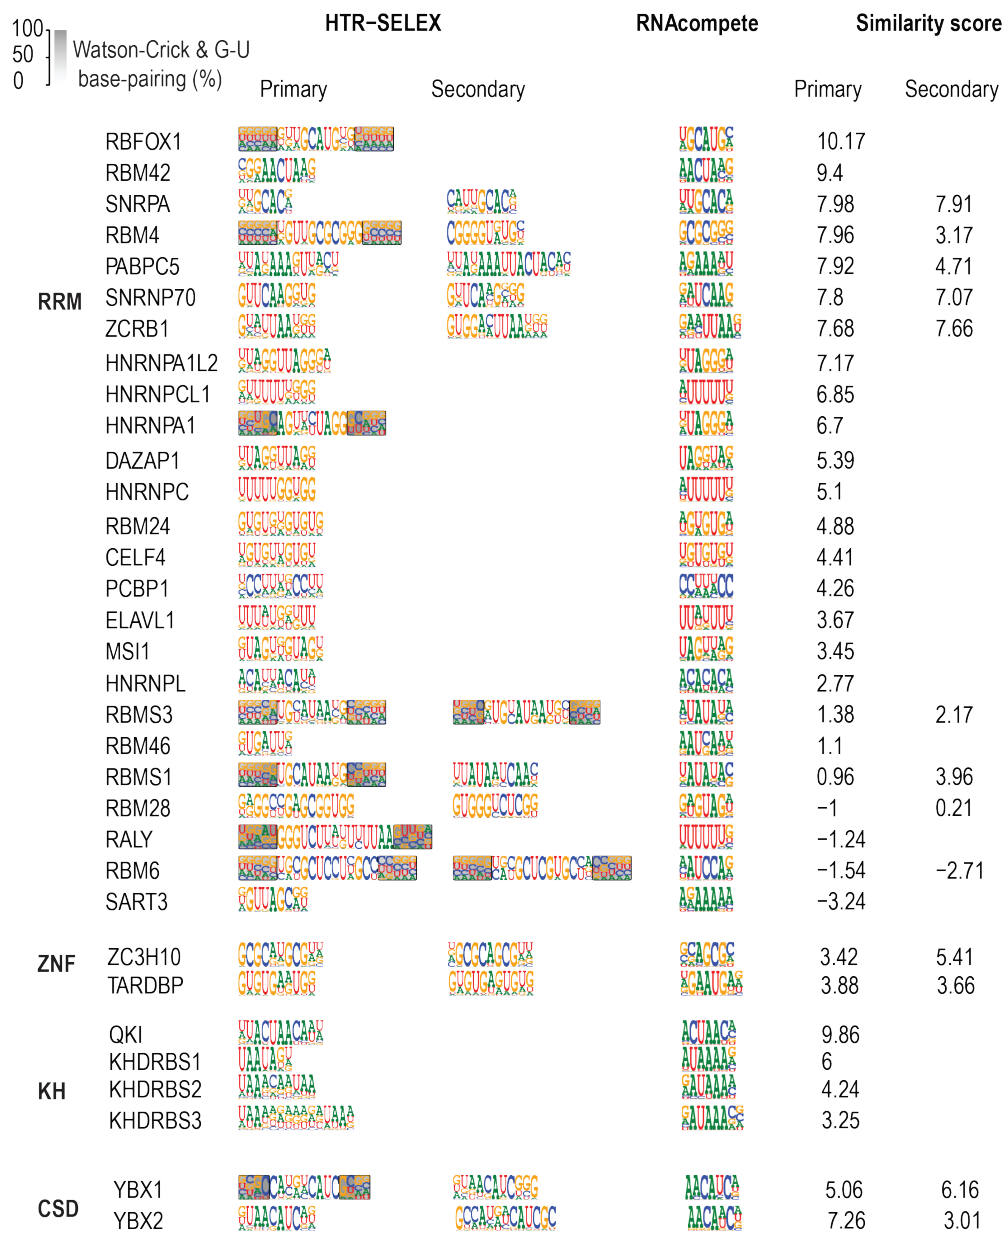

240

241 **Supplemental Figure S1. The similarity of motifs between HTR-SELEX and RNAcompete.**

242 Comparison of HTR-SELEX and RNAcompete generated motifs for all 33 proteins for which motifs  
 243 were obtained using both methods. Comparison includes both primary and secondary HTR-  
 244 SELEX motifs. Motifs are organized according to protein structural family, each of which is further  
 245 ordered by motif alignment score (see **Methods**). Higher score indicates higher similarity  
 246 between motifs.



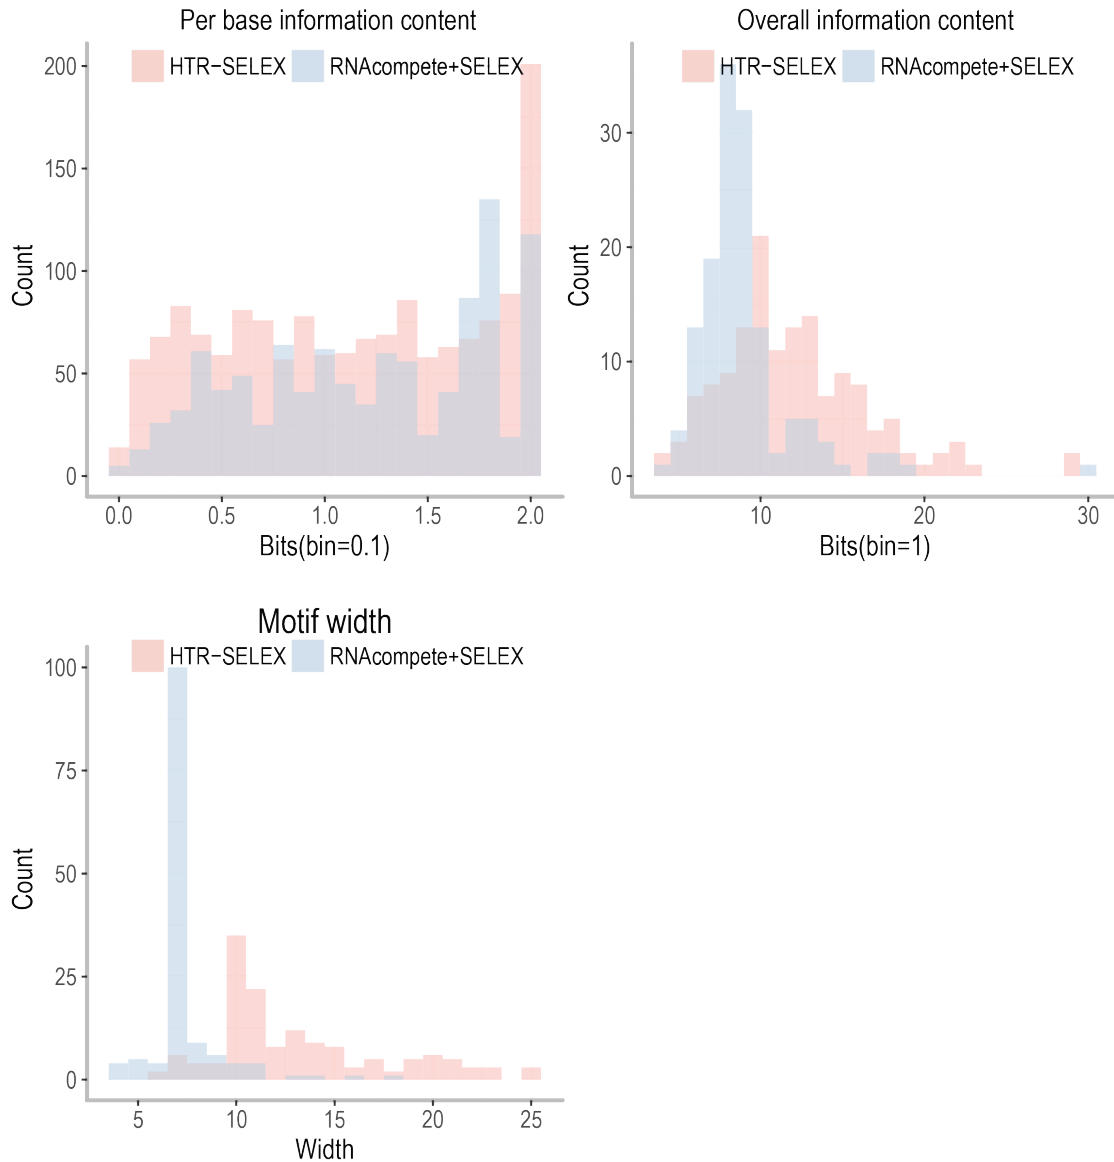

254

255 **Supplemental Figure S3. Higher information content and wider width distribution of HTR-**  
 256 **SELEX motifs.**

257 The available PWMs generated by RNAcompete and SELEX were collected from the CISBP-RNA  
 258 database for comparison. The per base information was calculated for every individual position  
 259 in the PWM. The overall information content of each motif is the sum of all positions in the PWM.  
 260 The width of each motif was generated by counting the number of position in the corresponding  
 261 PWM.

262

RBPs with dimeric binding specificities

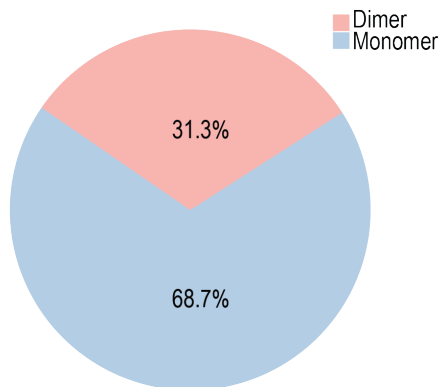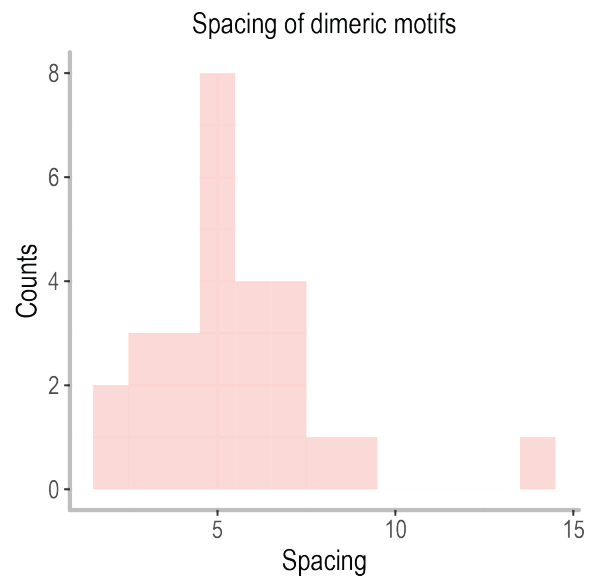

263

264

265 **Supplemental Figure S4. RBPs with multimeric binding sites.** About one third of RBPs

266 (31.3%, left) bind to the sequence as homodimers where two identical half-sites are separated

267 by a spacing sequence. The distribution of spacing preference of all RBPs is shown (right). The

268 discontinuous distribution of the spacing length is due to the small sample size.

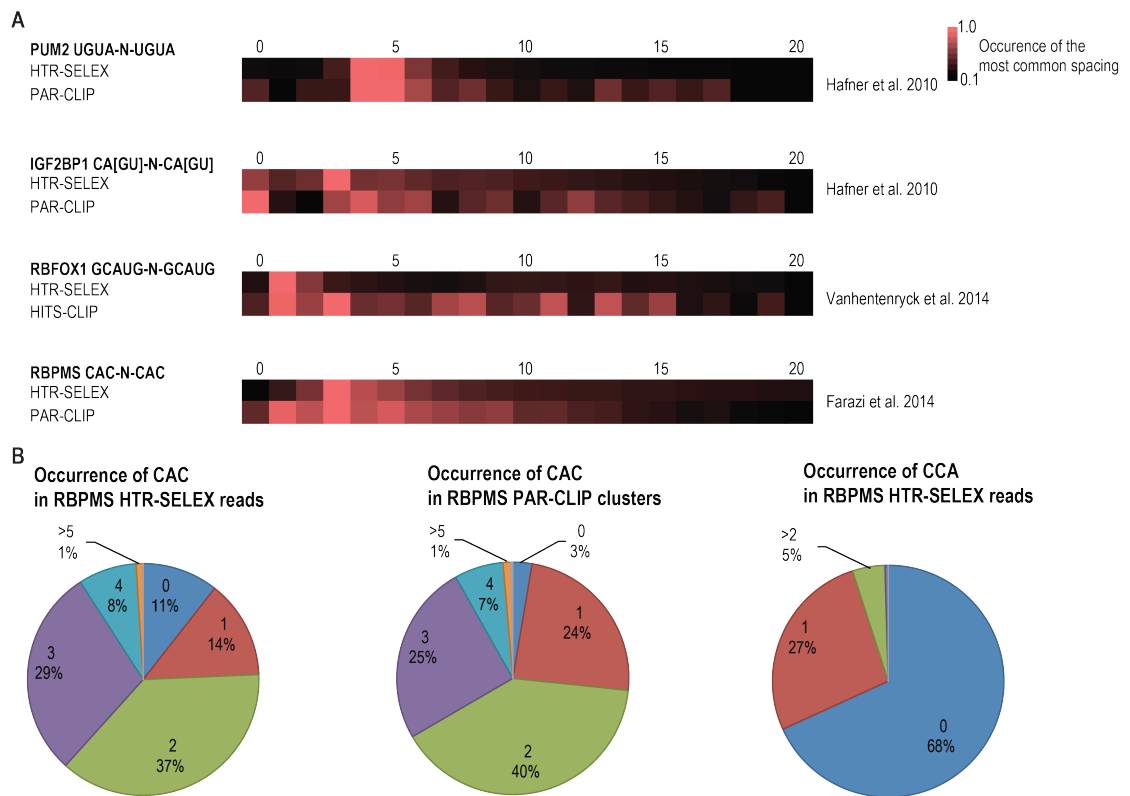

269

270 **Supplemental Figure S5. Spacing preferences between dimeric binding sites are consistent**  
 271 **in different assays.**

272 **(A)** For four RBPs, the same seeds were used in different assays to detect the spacing preferences.  
 273 The heatmaps represent the spacing information extracted from HTR-SELEX, PAR-CLIP and HITS-  
 274 CLIP. The results are consistent between HTR-SELEX (top row) and PAR-CLIP or HITS-CLIP  
 275 (bottom row). **(B)** Pie charts show the percentage of reads containing the indicated number of  
 276 matches to CAC sequence in RBPMS target sequences as determined by HTR-SELEX (left) or PAR-  
 277 CLIP (middle). Occurrence of the CCA-sequence that is not recognised by RBPMS but has the same  
 278 base content is also shown as an example of randomly expected incidence (right).

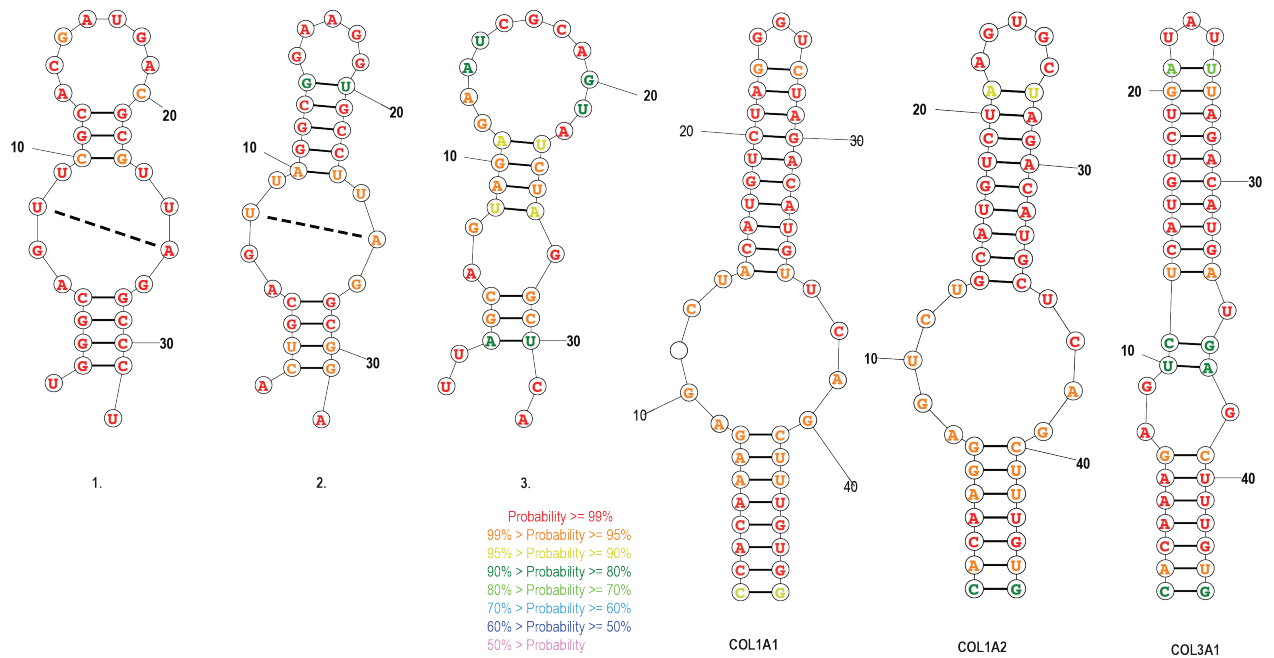

279

280

281 **Supplemental Figure S6. Known binding motifs of LARP6.**

282 The left three structures were generated using the sequences enriched in HTR-SELEX. The right  
 283 three structures illustrate the predicted structures of known collagen RNA sequences. The dash-  
 284 line indicates the internal base pair. The number labels the position of the base in the RNA  
 285 sequence.



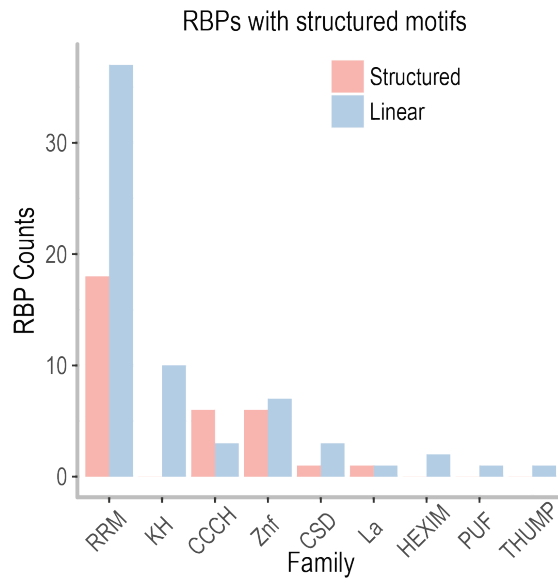

286

287 **Supplemental Figure S7. RBP families with and without structural specificity.**

288 The count of RBPs recognizing structured and unstructured binding motifs in each protein  
 289 structure family.

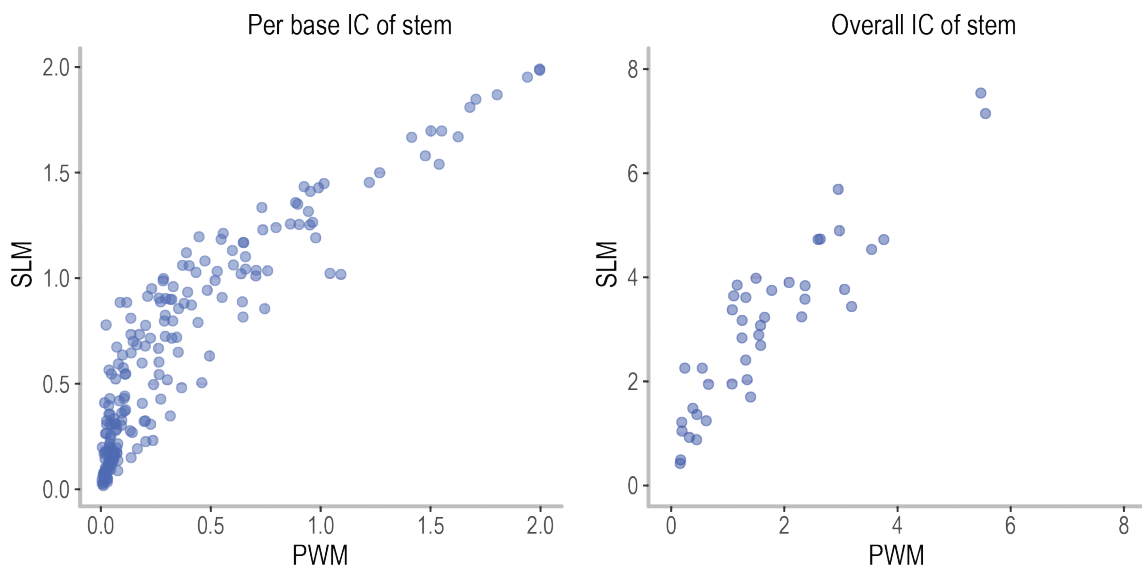

290

291 **Supplemental Figure S8. Information content correlation between the SLM and the mono-**  
 292 **nucleotide PWM.**

293 Left. Information content correlation per base. Right. Overall information content correlation. In  
 294 general, the SLM yielded higher per base information content due to the base pairing in the stem.

295



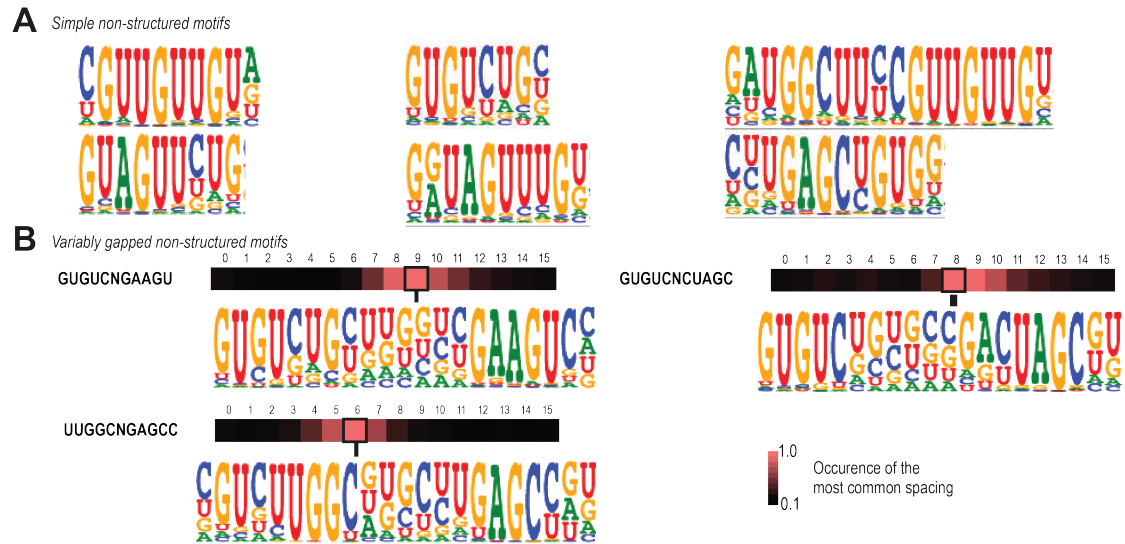

301

302 **Supplemental Figure S10. Various binding specificities detected for LARP6.**

303 LARP6 is able to recognise and bind to distinct sequences through different strategies besides  
 304 binding to the internal loop structure. **(A)** Short and long linear motifs **(B)** unstructured motifs  
 305 with gaps. The heatmap shows the preference of spacing between two half sites.

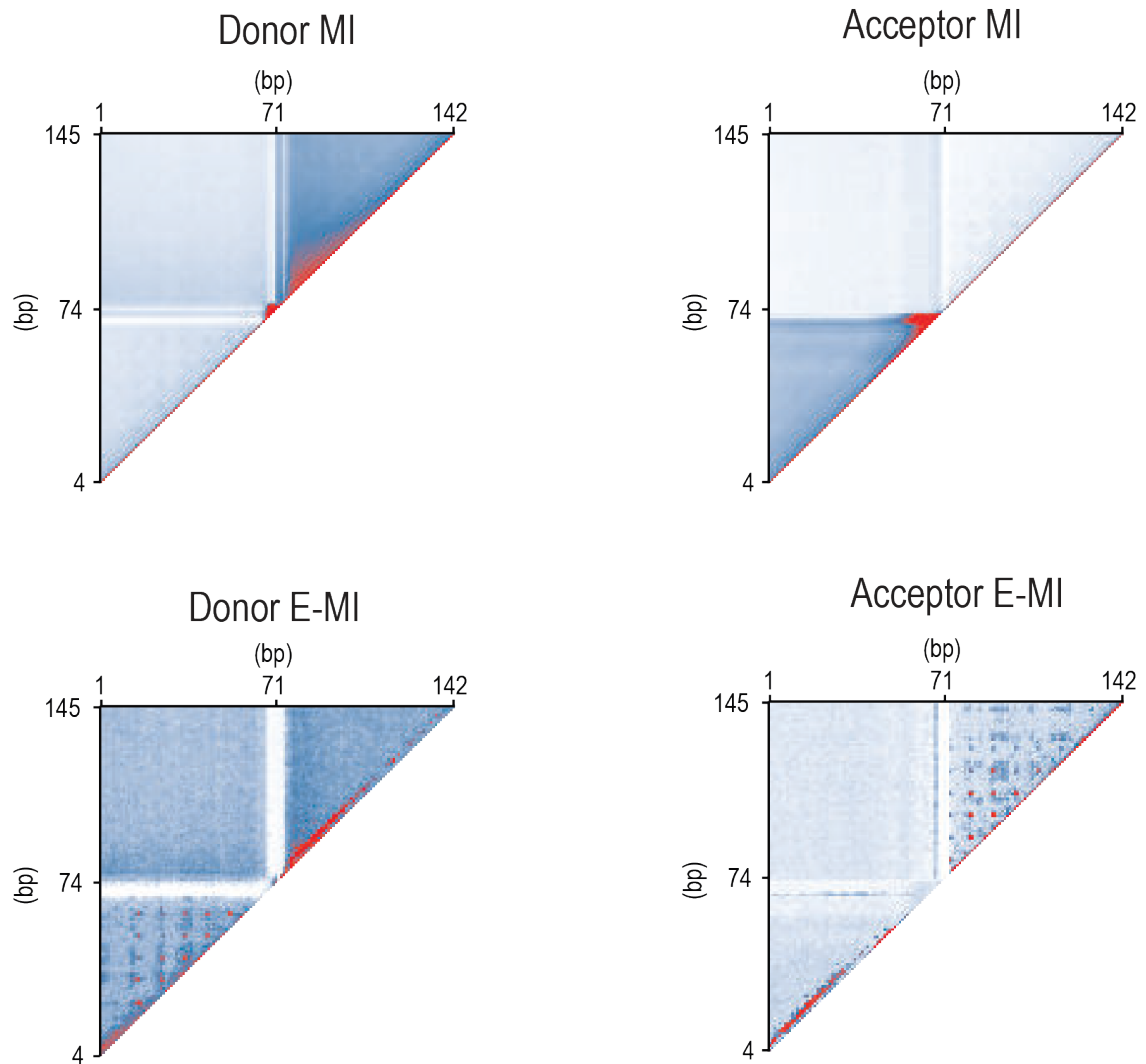

307

308 **Supplemental Figure S11. The mutual information (MI) meta-plots around the splicing**  
 309 **donor and acceptor sites.**

310 The splice donor and acceptor sites are placed in the centre of the 147nts sequence. The detected  
 311 signals close to the donor and acceptor sites are shown in red. The enriched 3-mer pair based  
 312 mutual information (E-MI) are also shown.

313

A

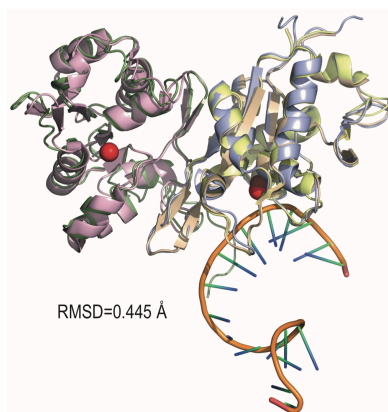

B

|         |                            |                |                |                        |                       |                |              |              |                 |                |                |             |           |            |           |           |           |           |           |           |           |             |          |          |          |          |          |          |          |          |          |          |          |          |          |          |          |          |          |          |          |          |              |              |              |              |              |              |              |              |              |              |              |     |
|---------|----------------------------|----------------|----------------|------------------------|-----------------------|----------------|--------------|--------------|-----------------|----------------|----------------|-------------|-----------|------------|-----------|-----------|-----------|-----------|-----------|-----------|-----------|-------------|----------|----------|----------|----------|----------|----------|----------|----------|----------|----------|----------|----------|----------|----------|----------|----------|----------|----------|----------|----------|--------------|--------------|--------------|--------------|--------------|--------------|--------------|--------------|--------------|--------------|--------------|-----|
|         |                            | β1             | α1             | α2                     |                       |                |              |              |                 |                |                |             |           |            |           |           |           |           |           |           |           |             |          |          |          |          |          |          |          |          |          |          |          |          |          |          |          |          |          |          |          |          |              |              |              |              |              |              |              |              |              |              |              |     |
| ZC3H12B | -----SLEDEIDNSDNLRFVVIDG   | <b>SNVAMSH</b> | GNKEEFS        | <b>CRGIQLAVDWFLDKG</b> | 225                   |                |              |              |                 |                |                |             |           |            |           |           |           |           |           |           |           |             |          |          |          |          |          |          |          |          |          |          |          |          |          |          |          |          |          |          |          |          |              |              |              |              |              |              |              |              |              |              |              |     |
| ZC3H12A | GGGTPKAPNLEPPLPEEEKEGSDLRH | <b>VVIDG</b>   | <b>SNVAMSH</b> | GNKEVFS                | <b>CRGILLAVNWFLER</b> |                |              |              |                 |                |                |             |           |            |           |           |           |           |           |           |           |             |          |          |          |          |          |          |          |          |          |          |          |          |          |          |          |          |          |          |          |          |              |              |              |              |              |              |              |              |              |              |              |     |
|         |                            | β2             | α3             | α4                     | β3                    | α5             |              |              |                 |                |                |             |           |            |           |           |           |           |           |           |           |             |          |          |          |          |          |          |          |          |          |          |          |          |          |          |          |          |          |          |          |          |              |              |              |              |              |              |              |              |              |              |              |     |
| ZC3H12B | <b>HKDITVFP</b>            | <b>AWK</b>     | EQSRF          | <b>L</b>               | APITD                 | <b>QDILRKL</b> | <b>KEKI</b>  | <b>LVFT</b>  | PSRRVQG         | <b>RVVCY</b>   | <b>DDRFIVK</b> | 285         |           |            |           |           |           |           |           |           |           |             |          |          |          |          |          |          |          |          |          |          |          |          |          |          |          |          |          |          |          |          |              |              |              |              |              |              |              |              |              |              |              |     |
| ZC3H12A | <b>HTDITVFP</b>            | <b>SWRKE</b>   | QPRPDV         | <b>PITDQ</b>           | <b>HILRELE</b>        | <b>KKKIL</b>   | <b>LVFT</b>  | <b>PSRRV</b> | <b>GGKRVVCY</b> | <b>DDRFIVK</b> | 231            |             |           |            |           |           |           |           |           |           |           |             |          |          |          |          |          |          |          |          |          |          |          |          |          |          |          |          |          |          |          |          |              |              |              |              |              |              |              |              |              |              |              |     |
|         |                            | α5             | β4             | α6                     | α7                    | β5             | β6           | α8           |                 |                |                |             |           |            |           |           |           |           |           |           |           |             |          |          |          |          |          |          |          |          |          |          |          |          |          |          |          |          |          |          |          |          |              |              |              |              |              |              |              |              |              |              |              |     |
| ZC3H12B | <b>LAFDS</b>               | <b>DG</b>      | <b>IV</b>      | <b>SN</b>              | <b>DNY</b>            | <b>L</b>       | <b>QVEKP</b> | <b>EWK</b>   | <b>FT</b>       | <b>EE</b>      | <b>RL</b>      | <b>LMYS</b> | <b>SF</b> | <b>VND</b> | <b>KF</b> | <b>MP</b> | <b>DD</b> | <b>PL</b> | <b>GR</b> | <b>HG</b> | <b>PS</b> | <b>LENF</b> | 345      |          |          |          |          |          |          |          |          |          |          |          |          |          |          |          |          |          |          |          |              |              |              |              |              |              |              |              |              |              |              |     |
| ZC3H12A | <b>LAYES</b>               | <b>DG</b>      | <b>IV</b>      | <b>V</b>               | <b>S</b>              | <b>N</b>       | <b>D</b>     | <b>T</b>     | <b>Y</b>        | <b>R</b>       | <b>D</b>       | <b>L</b>    | <b>Q</b>  | <b>G</b>   | <b>E</b>  | <b>R</b>  | <b>K</b>  | <b>F</b>  | <b>T</b>  | <b>E</b>  | <b>E</b>  | <b>R</b>    | <b>L</b> | <b>M</b> | <b>S</b> | <b>F</b> | <b>V</b> | <b>N</b> | <b>D</b> | <b>K</b> | <b>F</b> | <b>M</b> | <b>P</b> | <b>D</b> | <b>D</b> | <b>P</b> | <b>L</b> | <b>G</b> | <b>R</b> | <b>H</b> | <b>G</b> | <b>P</b> | <b>S</b>     | <b>L</b>     | <b>D</b>     | <b>N</b>     | 291          |              |              |              |              |              |              |     |
| ZC3H12B | <b>L</b>                   | <b>R</b>       | <b>K</b>       | <b>R</b>               | <b>I</b>              | <b>V</b>       | <b>P</b>     | <b>E</b>     | <b>H</b>        | <b>K</b>       | <b>K</b>       | <b>Q</b>    | <b>P</b>  | <b>C</b>   | <b>P</b>  | <b>Y</b>  | <b>G</b>  | <b>K</b>  | <b>R</b>  | <b>C</b>  | <b>T</b>  | <b>Y</b>    | <b>G</b> | <b>H</b> | <b>K</b> | <b>K</b> | <b>Y</b> | <b>H</b> | <b>P</b> | <b>E</b> | <b>R</b> | <b>A</b> | <b>N</b> | <b>Q</b> | <b>P</b> | <b>O</b> | <b>R</b> | <b>S</b> | <b>V</b> | <b>A</b> | <b>D</b> | <b>E</b> | <b>L</b>     | <b>R</b>     | <b>I</b>     | <b>S</b>     | <b>A</b>     | <b>K</b>     | 397          |              |              |              |              |     |
| ZC3H12A | <b>L</b>                   | <b>R</b>       | <b>K</b>       | <b>K</b>               | <b>P</b>              | <b>L</b>       | <b>T</b>     | <b>L</b>     | <b>E</b>        | <b>H</b>       | <b>R</b>       | <b>K</b>    | <b>Q</b>  | <b>P</b>   | <b>C</b>  | <b>P</b>  | <b>Y</b>  | <b>G</b>  | <b>R</b>  | <b>K</b>  | <b>C</b>  | <b>T</b>    | <b>Y</b> | <b>G</b> | <b>I</b> | <b>K</b> | <b>R</b> | <b>F</b> | <b>F</b> | <b>H</b> | <b>P</b> | <b>E</b> | <b>R</b> | <b>P</b> | <b>S</b> | <b>C</b> | <b>P</b> | <b>O</b> | <b>R</b> | <b>S</b> | <b>V</b> | <b>A</b> | <b>-----</b> | 334 |

314

315 **Supplemental Figure S12. The comparison of ZC3H12B with the homologous protein**  
 316 **ZC3H12A.**

317 **(A)** Superimposition of homodimer ZC3H12B (colored in green and blue) with the respective  
 318 dimer from ZC3H12A NCD-ZF (colored in pink and yellow, respectively) and ZC3H12A NCD  
 319 monomer containing a Mg<sup>2+</sup> ion (colored beige, the Mg<sup>2+</sup> ion is presented as brown sphere).  
 320 Overall the structures are very similar (rmsd = 0.456Å and 0.439 Å, respectively). The difference  
 321 is observed in the loop areas and in the slightly shifted position of the Mg<sup>2+</sup> ion. **(B)** The sequence  
 322 alignment of ZC3H12B and ZC3H12A performed with Clustal Omega (Sievers et al. 2011).  
 323 Sequence numbering is presented in the right side of the sequences. The secondary structure  
 324 elements correspond to ZC3H12B are named on the top and highlighted in yellow (α-helices) and  
 325 blue (β-strands). The residues involved in the interactions with RNA are shown in bold violet and  
 326 highlighted by green boxes. Two aspartate residues (Asp280 and Asp298) involved the Mg-ion  
 327 coordination are colored red. The sequence corresponds to Zn-finger is highlighted grey for both  
 328 proteins.

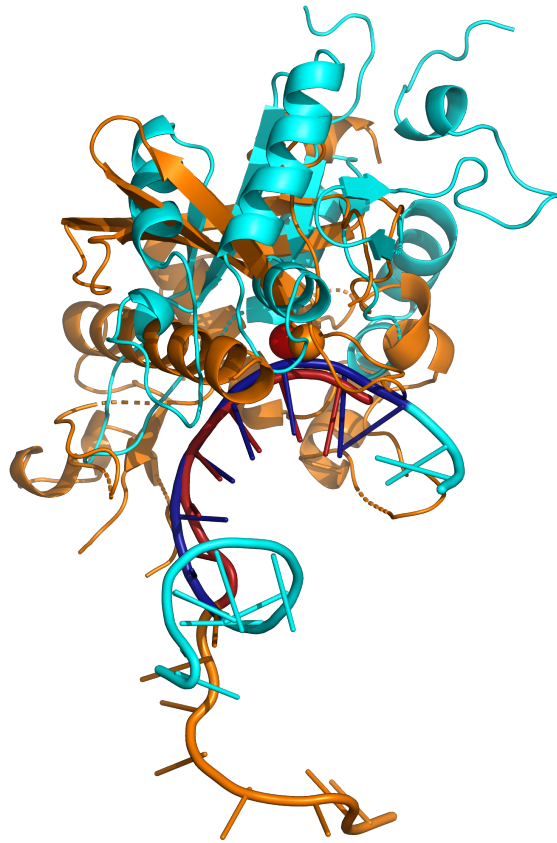

329

330 **Supplemental Figure S13. Comparison of ZC3H12B:RNA and DIS3:RNA structures.**

331 Superimposition of ZC3H12B:RNA (cyan) structure with a structure of the DIS3:RNA (orange)  
332 complex from the human exosome bound to an inhibitory nucleic acid. Note that the protein  
333 structures of ZC3H12B and DIS3 are completely different, whereas the overall horseshoe-like  
334 structure of the bound RNA is very similar near the active site. Only RNA segments (U9-U14 of  
335 DIS3:RNA and U11CGGUAG17 of ZC3H12B:RNA) that form the horseshoe-shape are used to  
336 overlay. The RNA segments folded into the horseshoe-shape in complexes with ZC3H12B and  
337 DIS3 are indicated dark blue and dark brown, respectively.

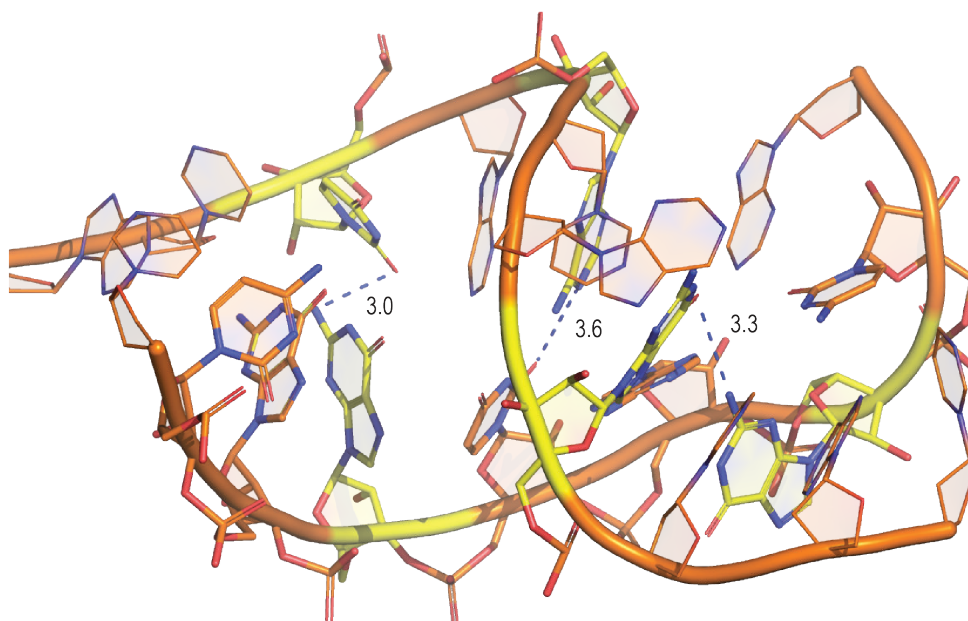

338

339 **Supplemental Figure S14. Interaction between two fragments of two RNA molecules.**

340 Fragments of two RNA molecules interacting around a 2-fold axis form three hydrogen bonds

341 between G14-U'11, U15-A'9 and A16-G'6.





352

353

Gel1

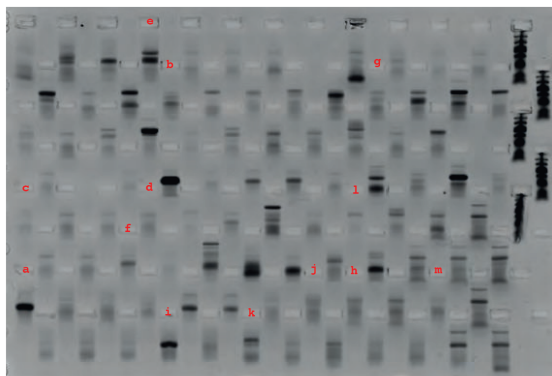

Gel2

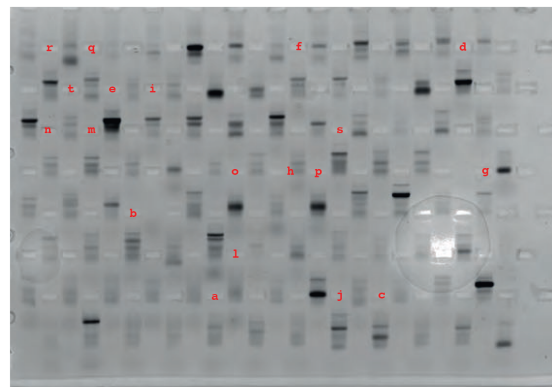

Gel3

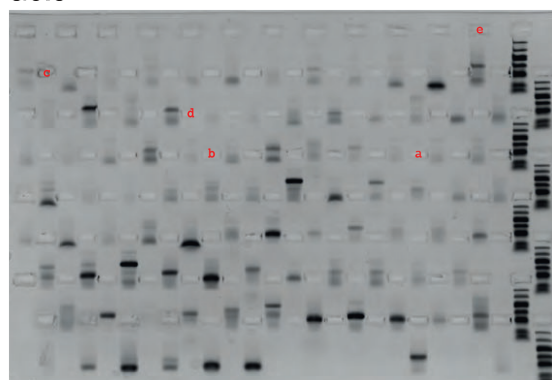

Gel4

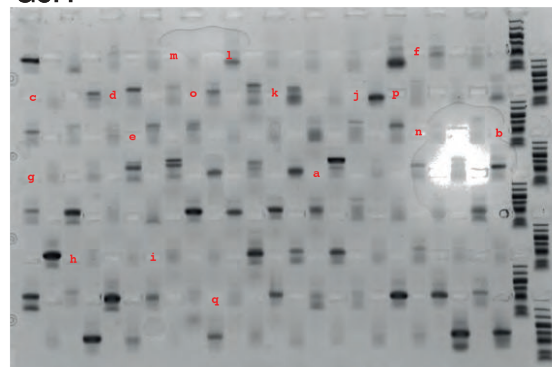

Gel5

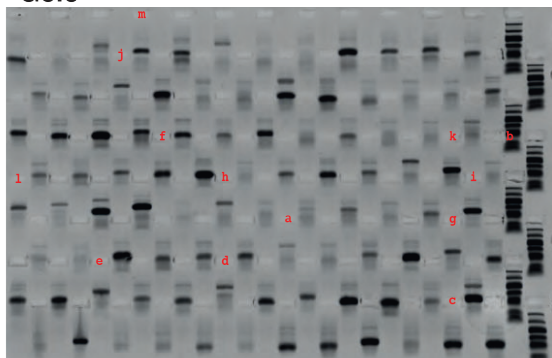

Gel6

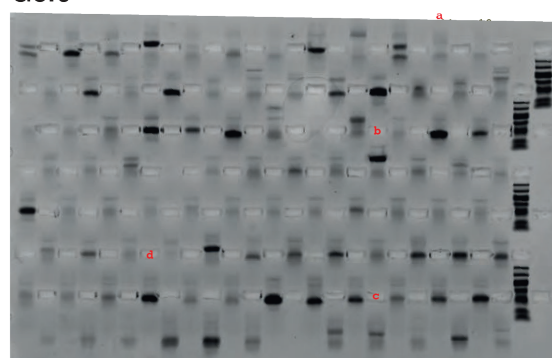

354

355 **Supplemental Figure S16. SDS page analysis of the proteins subjected to HTR-SELEX.**

356 RBP fusion proteins were expressed in 96-well plates, purified and analyzed using 96-well SDS-  
357 PAGE gels (ePAGE, Invitrogen, run downward). Lanes containing proteins that correspond to  
358 generated motifs (see **Supplemental Table S1**) are indicated in red letters in the respective  
359 loading wells.

360  
361  
362  
363  
364  
365  
366  
367  
368  
369

**Supplemental Figure 17. Annotation of RBDs in the constructs and full length protein sequences.** SMART database was used to annotate the RBDs in both constructs and full length amino acid sequences of the longest protein-coding transcripts obtained from Eensembl (version 99). For each construct, the full length protein is shown (top) with the aligned construct sequence (bottom). The RBDs are indicated by the colored boxes and the entire amino acid sequence is presented as a grey bar. The primary motif and secondary motif are shown on the middle and right columns, respectively (see the enclosed Supplemental\_Fig\_S17.pdf).

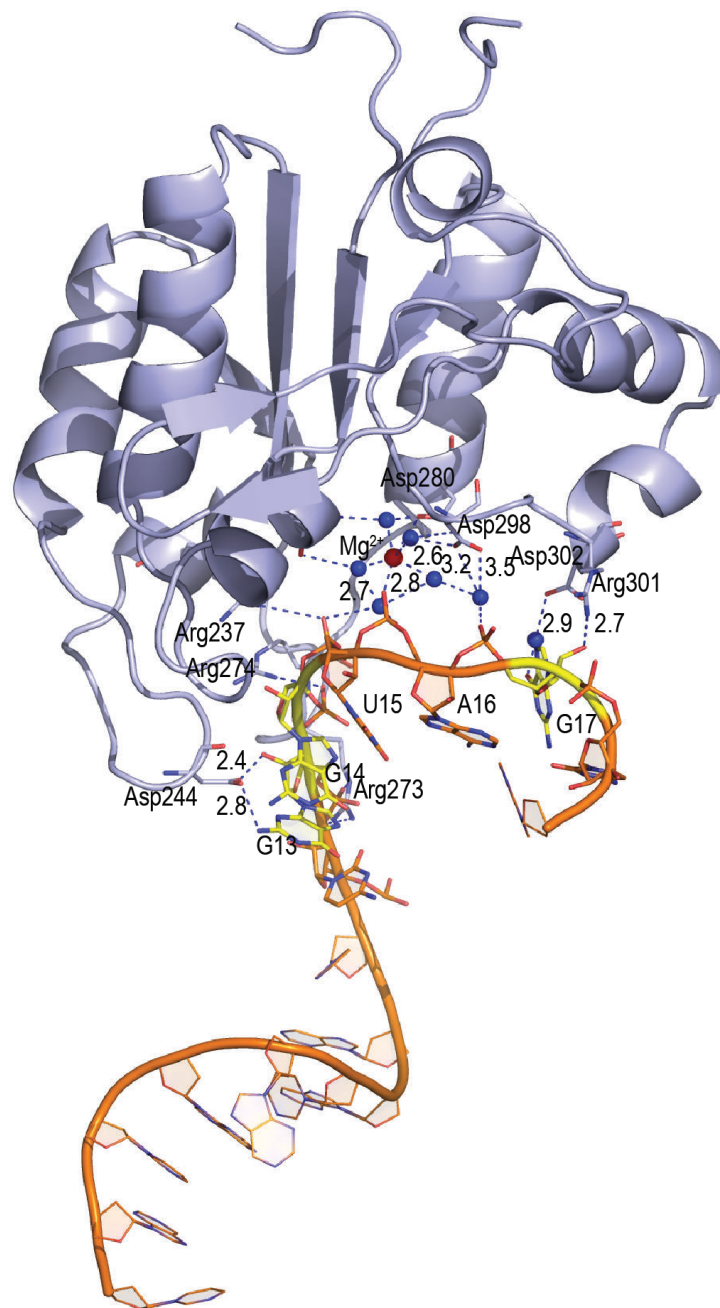

370

371 **Supplemental Figure S18. Magnified view of the structure of the ZC3H12B:RNA complex.**

372 ZC3H12B binds to the GGUAG sequence that is located close to the 3' end of the co-crystallized

373 RNA. Interaction between the protein and RNA molecule is mediated by a  $Mg^{2+}$  ion (red sphere),

374 water molecules (blue spheres) and multiple direct hydrogen bonds between the two

375 macromolecules. For clarity, only the water molecules found in the active site are shown, and the

376 involved hydrogen bonds are indicated by dashed lines (numbers indicate bond length in Å).

377

**A**

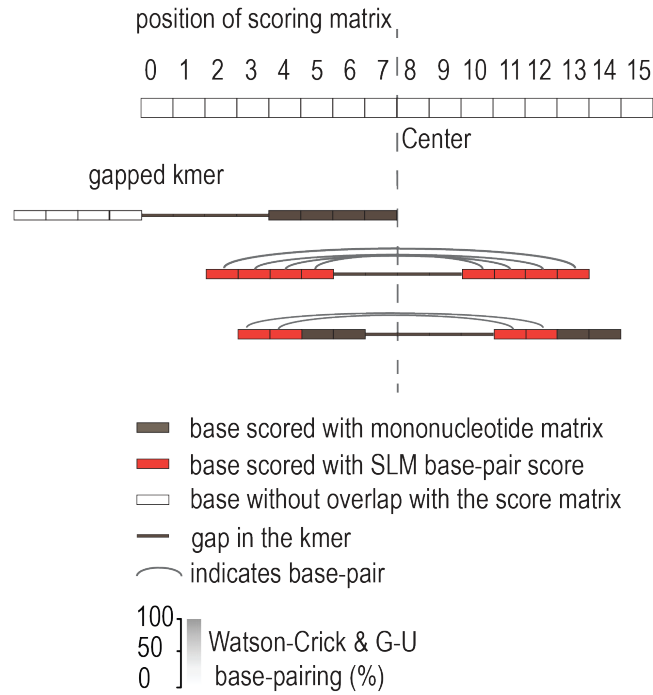

**B**

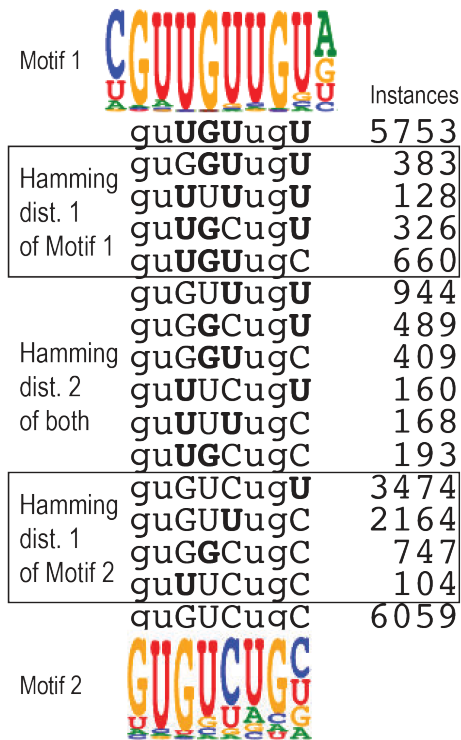

**C**

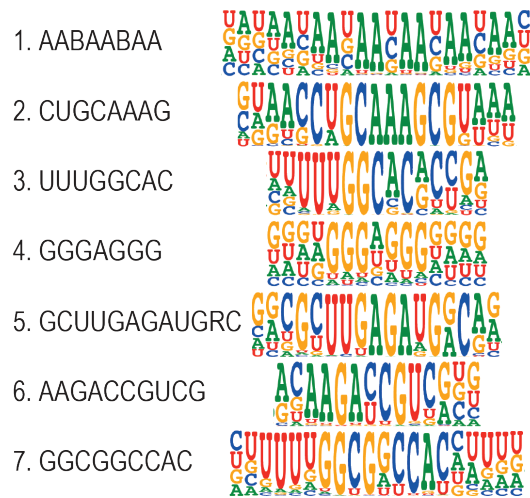

378

379

380 **Supplemental Figure S19. Motifs and controls**

381 **A)** Schematic description of the scoring process for the SLM. All possible alignment positions

382 between an 8-mer with a 4 base gap in the middle and the model are searched in order to find the

383 aligned position with the best score. When the 8-mer overlaps both bases of a SLM-predicted  
384 base-pair, the score for the paired position (red tiles connected by black lines) is derived from the  
385 SLM base-pair score. In cases where the kmer aligns to only one base of the SLM base-pair, the  
386 score for the position (black) is derived from the mononucleotide matrix. **B)** Seeds that represent  
387 local maxima within a Huddinge distance of one (see **Supplemental Methods**) define distinctly  
388 different motifs. Panel displays a detailed analysis of an example case of subsequence counts near  
389 seeds for LARP6 Motifs 1 and 2. The count from the fourth HTR-SELEX cycle for the consensus  
390 sequences of these two motifs, and all possible subsequences that represent the shortest edit path  
391 between them are shown. Hamming distance from the seed closer in Hamming distance to the  
392 subsequences is also indicated. Note that no subsequence in the path between the two consensus  
393 sequences has a count higher than the consensus sequences themselves. **C)** Commonly enriching  
394 background motifs. Motifs that enrich in HTR-SELEX in a large fraction of all experiments  
395 performed using unrelated *E.coli*-derived proteins are shown. These motifs represent either  
396 specific target sites for unknown RBPs derived *E. coli*, or aptamers that have affinity towards  
397 plasticware, the magnetic beads or constant parts of the fusion proteins.  
398

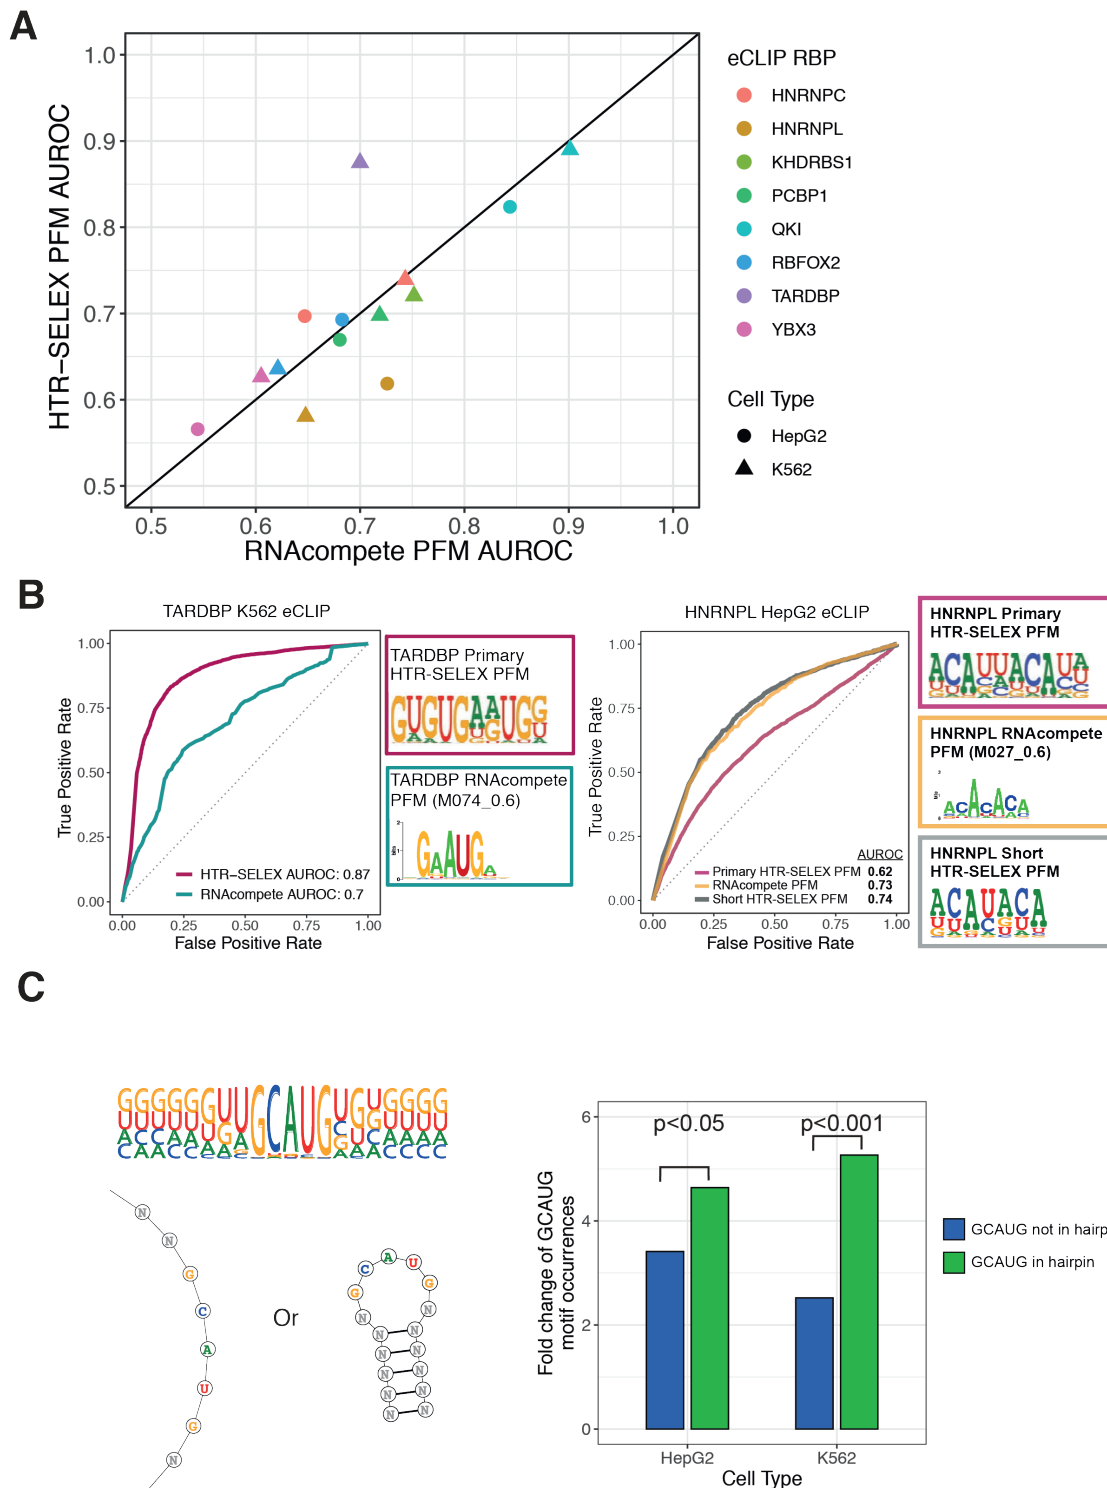

399

400 **Supplemental Figure S20. *in vivo* enrichment of the HT-SELEX motifs**

401 **A)** Plot compares the performance of HTR-SELEX and RNA-compete generated motifs (assessed  
 402 as AUROC scores) in predicting genomic regions bound by the corresponding proteins *in vivo*  
 403 based on eCLIP data. Note that the HTR-SELEX generated motif predicts *in vivo* binding better for  
 404 TARDBP, whereas the RNA-compete generated motif performs better in the case of HNRNPL. **B)**

405 ROC plots for the two most significant outliers TARDBP and HNRNPL. HTR-SELEX motif predicts  
 406 longer and higher information content motif for the TARDBP, which outperforms the short motif  
 407 derived from RNAcompete. In the case of HNRNPL, our original primary HTR-SELEX motif  
 408 performed worse than the RNAcompete motif. Re-analysis of the the 8-mer enrichment in the  
 409 HTR-SELEX data revealed a secondary motif with similar, shorter spacing of the ACAU half-site of  
 410 HNRNPL. The performance of this motif against the eCLIP data was similar to that of the  
 411 RNAcompete motif. The better performance of the shorter motif over the original primary HTR-  
 412 SELEX motif is potentially due to the fact that the short motif can match more than one spacing  
 413 between the ACAU half-sites. **C)** Binding preference of RBFOX proteins to structured sites is  
 414 confirmed by analysis of eCLIP data. Left: RBFOX1 motif and cartoons of the respective structural  
 415 contexts. Right: fold change of matches to the middle GCAUG consensus in two eCLIP datasets  
 416 from the indicated cell lines, compared to genomic control regions. Note that there is a larger  
 417 enrichment of GCAUG matches that are within a structural context. The *p*-values for the increase  
 418 in enrichment for the structured over the unstructured form are also indicated (calculated using  
 419 Winflat; (Audic and Claverie 1997)).

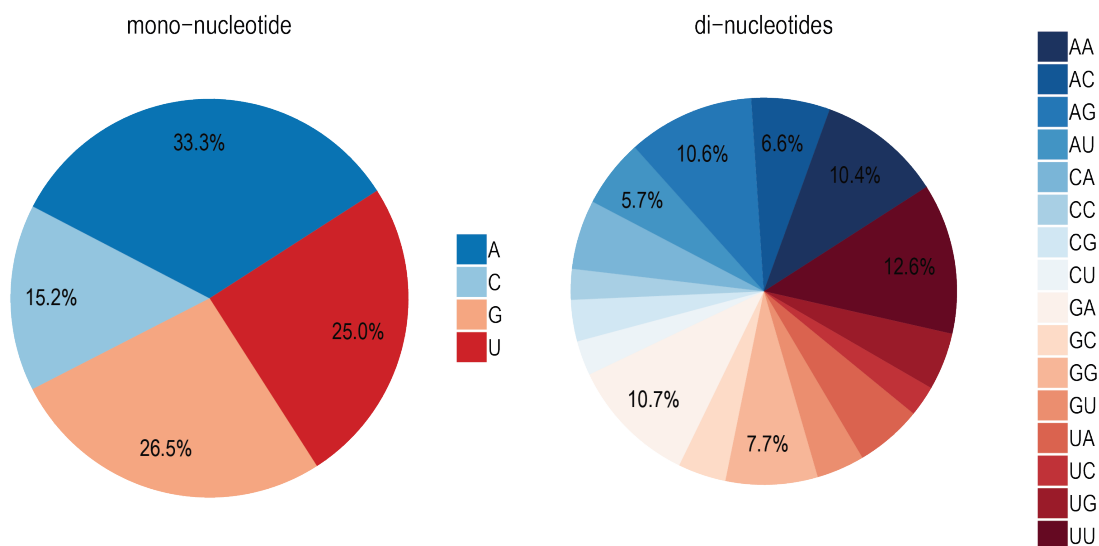

420

421 **Supplemental Figure 21. Nucleotide composition bias in the RNAcompete dataset.**

422 Frequencies of mononucleotides (left) and dinucleotides (right) across all of the human  
 423 RNAcompete motifs (downloaded from cisBP-RNA, version 0.6).

424 **Supplemental Table**

425

426 **Supplemental Table S1. Sequence information of proteins and DNA.**

427 **Supplemental Table S2. PWMs of the linear motifs.**

428 **Supplemental Table S3. PWMs of the structured motifs.**

429 **Supplemental Table S4. Dependency matrices of paired bases for the structured motifs.**

430 **Supplemental Table S5. X-ray data statistics and refinement parameters.**

431 **Supplemental Table S6. Full data for analysis of the conservation of motif matches.**

432 **Supplemental Table S7. Full data of the GO enrichment analysis.**

433 **Supplemental Table S8. Accession numbers and details of the eCLIP data used.**

434

435 **Supplemental Data**

436 **Supplemental Data S1. Meta-plots of the motif match enrichment near splice donor,**  
437 **acceptor, TSS, start and stop codon positions (y-axis scaled separately)**

438 **Supplemental Data S2. Meta-plots of the motif match enrichment near splice donor,**  
439 **acceptor, TSS, start and stop codon positions (common y-axis scale).**

440 **Supplemental Data S3. Histograms of the distances between motif matches and genomic**  
441 **features.** For both strands, motif matches cover the indicated positions, and positions to their  
442 left (green bar indicates the width of the motifs). Zero on the x-axis indicates the last base of the  
443 feature indicated on the left side.

444 **Supplemental Data S4. Count of motif matches near the genomic features.**



446 **REFERENCES**

447

448

449 Afonine PV, Grosse-Kunstleve RW, Echols N, Headd JJ, Moriarty NW, Mustyakimov M,  
 450 Terwilliger TC, Urzhumtsev A, Zwart PH, Adams PD. 2012. Towards automated  
 451 crystallographic structure refinement with phenix.refine. *Acta Crystallogr D Biol*  
 452 *Crystallogr* **68**: 352-367.

453 Audic S, Claverie JM. 1997. The significance of digital gene expression profiles. *Genome*  
 454 *Res* **7**: 986-995.

455 Chen VB, Arendall WB, 3rd, Headd JJ, Keedy DA, Immormino RM, Kapral GJ, Murray  
 456 LW, Richardson JS, Richardson DC. 2010. MolProbity: all-atom structure validation  
 457 for macromolecular crystallography. *Acta Crystallogr D Biol Crystallogr* **66**: 12-21.

458 Chen Y, Zubovic L, Yang F, Godin K, Pavelitz T, Castellanos J, Macchi P, Varani G. 2016.  
 459 Rbfox proteins regulate microRNA biogenesis by sequence-specific binding to their  
 460 precursors and target downstream Dicer. *Nucleic Acids Res* **44**: 4381-4395.

461 Davis CA, Hitz BC, Sloan CA, Chan ET, Davidson JM, Gabdank I, Hilton JA, Jain K,  
 462 Baymuradov UK, Narayanan AK et al. 2018. The Encyclopedia of DNA elements  
 463 (ENCODE): data portal update. *Nucleic Acids Res* **46**: D794-D801.

464 Emsley P, Lohkamp B, Scott WG, Cowtan K. 2010. Features and development of Coot. *Acta*  
 465 *Crystallogr D Biol Crystallogr* **66**: 486-501.

466 Jolma A, Yan J, Whittington T, Toivonen J, Nitta KR, Rastas P, Morgunova E, Enge M,  
 467 Taipale M, Wei G et al. 2013. DNA-binding specificities of human transcription  
 468 factors. *Cell* **152**: 327-339.

469 Jolma A, Yin Y, Nitta KR, Dave K, Popov A, Taipale M, Enge M, Kivioja T, Morgunova E,  
 470 Taipale J. 2015. DNA-dependent formation of transcription factor pairs alters their  
 471 binding specificity. *Nature* **527**: 384-388.

472 Lorenz R, Bernhart SH, Honer Zu Siederdisen C, Tafer H, Flamm C, Stadler PF, Hofacker  
 473 IL. 2011. ViennaRNA Package 2.0. *Algorithms Mol Biol* **6**: 26.

474 Loytynoja A, Goldman N. 2005. An algorithm for progressive multiple alignment of  
 475 sequences with insertions. *Proc Natl Acad Sci U S A* **102**: 10557-10562.

476 Mathews DH. 2014. RNA Secondary Structure Analysis Using RNAstructure. *Curr Protoc*  
 477 *Bioinformatics* **46**: 12.16.11-25.

478 McCoy AJ, Grosse-Kunstleve RW, Adams PD, Winn MD, Storoni LC, Read RJ. 2007.  
 479 Phaser crystallographic software. *J Appl Crystallogr* **40**: 658-674.

480 Nitta KR, Jolma A, Yin Y, Morgunova E, Kivioja T, Akhtar J, Hens K, Toivonen J,  
 481 Deplancke B, Furlong EE et al. 2015. Conservation of transcription factor binding  
 482 specificities across 600 million years of bilateria evolution. *Elife* **4**.

483 Ray D, Kazan H, Cook KB, Weirauch MT, Najafabadi HS, Li X, Gueroussov S, Albu M,  
 484 Zheng H, Yang A et al. 2013. A compendium of RNA-binding motifs for decoding  
 485 gene regulation. *Nature* **499**: 172-177.

486 Savitsky P, Bray J, Cooper CD, Marsden BD, Mahajan P, Burgess-Brown NA, Gileadi O.  
 487 2010. High-throughput production of human proteins for crystallization: the SGC  
 488 experience. *J Struct Biol* **172**: 3-13.

489 Tickle I, Flensburg, C, Keller, P, Paciorek, W, Sharff, A, Vornrhein, C, Bricogne, G. 2017.  
 490 STARANISO. **Cambridge, UK: Global Phasing Ltd;** .

491 Vornrhein C, Flensburg C, Keller P, Sharff A, Smart O, Paciorek W, Womack T, Bricogne G.  
 492 2011. Data processing and analysis with the autoPROC toolbox. *Acta Crystallogr D*  
 493 *Biol Crystallogr* **67**: 293-302.

494 Winn MD, Ballard CC, Cowtan KD, Dodson EJ, Emsley P, Evans PR, Keegan RM, Krissinel  
495 EB, Leslie AG, McCoy A et al. 2011. Overview of the CCP4 suite and current  
496 developments. *Acta Crystallogr D Biol Crystallogr* **67**: 235-242.  
497
